# Supplementary material for: The life history of retrocopies illuminates the evolution of new mammalian genes
Source: HighWire-hosted journal article supplement (doi:10.1101/gr.198473.115), 2016-01-04
Supplement: Supplemental_Methods.docx [file Supplemental_Methods.docx]

**Supplemental Methods**

**Detection of retrocopies**

We detected retrocopies in the genomes of human, chimpanzee, gorilla, orangutan, macaque, mouse, rat, opossum, Tasmanian devil, wallaby, platypus and chicken using a refined version of our published approach (Marques et al. 2005). For each species, the amino acid sequences of all protein coding genes [obtained from Ensembl release 65 (Flicek et al. 2012); filtered for intronless olfactory receptors genes] were aligned against their respective genomes using tBLASTn (Altschul et al. 1997) (version 2.2.25+). Loci where at least three exons from a gene mapped adjacently (separated by less than 40 bp) were considered as candidate retrocopy loci. This approach was chosen to avoid the inclusion of genes from large monoexonic gene families where one or multiple paralogs were annotated as multiexonic (due to intronization events, integration of new sequences in their locus or because of erroneous gene annotation). Despite this approach might lead to the exclusion of real retrocopies originated from short, potentially young parental genes, we chose it to avoid the inclusion of false positives that might affect our conclusions. These sequences were aligned back to the protein sequences using the *fasty* software from the FASTA package (Pearson and Lipman 1988) (version 36) in order to identify the putative parental gene, defined as the multiexonic protein coding gene with the best alignment (>50% similarity, aligned over >70% of its sequence, retrocopy sequence spanning at least 2 parental introns and more than 30 bp from at least 3 parental exons) with the retrocopy. Because of the poor protein annotations in some species, we alternatively aligned candidate retrocopies against protein sequences from all species (except for Tasmanian devil and wallaby, in which case we only used proteins from human, mouse and opossum), this time requiring the same retrocopy locus to be recognized by parental genes from at least two outgroup species. Using this approach, we identified between 25-2498 additional retrocopies in all species, corresponding to 9%-42% of the total number of annotated retrocopies.

We note that parental gene assignment might sometimes be erroneous in the case of sex chromosomes, for two reasons. First, given that Y chromosomal genes diverge much more rapidly than X-linked genes (Cortez et al. 2014), retrocopies could in principle be mistakenly assigned to X-linked parents in the similarity-based approach presented above, even if they stem from Y-linked genes. Second, the Ensembl database (Flicek et al. 2012), upon which our pipeline is based, does currently not cover Y chromosome sequences and their annotations for several studied species (gorilla, orangutan, rat, opossum, platypus). Y genes were recently identified in dedicated studies (Bellott et al. 2014; Cortez et al. 2014), but intron annotations are typically missing, making these data incompatible with our rigorous detection pipeline. Nevertheless, such misassignments are expected to be very rare, given that very few X-linked genes have extant Y gametologs and that a recent dedicated phylogenetic study (Hughes et al. 2015) only detected two likely Y-derived retrogenes in the seven species overlapping with our study (these retrogenes are marked in Supplemental Table S1). In all of these cases, the parental genes have been lost during evolution, rendering the detection of these events particularly challenging (see also our orphan detection approach described below).

**Synteny definition**

We defined syntenic regions for each species pair based on the genomic coordinates of 1-to-1 orthologues in Ensembl. Specifically, for each gene in species A we identified its closest downstream gene, and defined the syntenic interval delimited by the two loci in species B if the corresponding orthologous genes mapped on the same chromosome in collinear orientation and separated by a similar distance (+/- 50% of the distance in species A).

**Dating of retroposition events**

Retrocopy origin was dated using two alternative approaches. The first approach consisted in calculating the fraction of synonymous substitutions per synonymous site (*dS*) between the retrocopy and its parental gene. To this aim, we performed a pairwise codon-based alignment of the predicted coding sequences of retrocopies and their parental genes using ClustalW (Larkin et al. 2007) (version 2.0.12) and PAL2NAL (Suyama et al. 2006) (version 14), and then calculated pairwise *dS* values using the *codeml* program included in the PAML package (Yang 2007) (version 4.5).

To follow the evolution of orthologous retrocopies originated from the same retroposition event, we then dated their origin by looking for presence/absence of orthologous retrocopies in the ten species analyzed. We considered retrocopies to be orthologues if they were located in syntenic positions in two species and if their reciprocal sequence similarity was > 50%, based on *fasta* (Pearson and Lipman 1988)alignments of unmasked genomic sequences. For retrocopies that could not be placed on the synteny map, orthologues were defined as reciprocal best hits (sequence identity > 50%, alignment spanning at least 60% of total length of target retrocopy, e-value < 10-6) based on *fasta* alignments. For each species, we then grouped all its retrocopies with their 1-to-1 orthologous copies in other species, thus creating species-centred retrocopy families. Finally, species-centered families from all species containing similar sets of retrocopies were merged to define the final orthologous retrocopy families. After this merging step, if multiple retrocopies from the same species were found in a cluster, the whole cluster was removed. Similarly, if the same retrocopy from a given species was included in two or more retrocopy families, all families containing the retrocopy were deleted. This approach was used to conservatively ensure the absence of ambiguous 1-to-many or many-to-many orthology relationships, leaving only retrocopy families with 1-to-1 orthology relationships.

**Promoter origin analysis**

We identified retrocopy promoters in human and mouse based on cap analysis gene expression (CAGE) data from 152 and 271 tissues, respectively, produced by Forrest et al. (Forrest et al. 2014). For retrocopies with more than one reported CAGE peak, we defined the TSS as the highest scoring peak on the same strand within the assembled transcript or up to 2 kb upstream. We then evaluated the promoter origin of these transcripts as follows:

*Parental promoter inheritance:* We defined inherited parental promoters as regions upstream of a retrocopy TSS that could be aligned to the parental gene locus. To this aim, we aligned the repeat-masked 1 kb upstream region of each expressed retrocopy on the parental genomic locus (+5 kbp upstream of the annotated TSS; in case of multiple annotated isoforms we considered the longest one) using the *ssearch* algorithm from FASTA package (Pearson and Lipman 1988). We considered all retrocopy upstream sequences aligned over more than 100 bp and with a similarity >50% with their parental locus as inherited parental promoters.

*Integration into a host gene*: To identify chimeric gene transcripts where a retrocopy is spliced together with the upstream exons of a host protein coding gene, we determined the origins of newly gained retrocopy exons by aligning the exonic sequences of all multiexonic retrocopies to cDNAs from outgroup species (human/mouse, opossum or chicken) using the *fasta* software from FASTA package. To exclude the presence of the retrocopy in the outgroup species we verified that the retrocopy could not be aligned to any of the syntenic annotated cDNA sequences. We defined as host genes those were at least one newly gained exon of the retrocopy showed a significant alignment (identity > 50%, e-value < 10-4) with a single outgroup gene.

*Head-to-head promoter piggybacking*: Retrocopies transcribed from a bidirectional promoter of a neighbouring protein coding gene were defined as those copies oriented in divergent orientation with an annotated Ensembl gene located up to 2 kb upstream of their TSS.

*Novel promoters derived from CpG islands*: Retrocopy promoters that did not fit any of the aforementioned categories were considered putatively novel. We determined to what extent novel promoters were derived from CpG islands based on the overlap of the upstream retrocopy loci (1 kbp) with unmethylated CpG islands defined by CAP-seq (CXXC affinity purification followed by deep sequencing) (Illingworth et al. 2010) not associated to other protein-coding (from the Ensembl databases) or lncRNA (Necsulea et al. 2014) genes. CpG islands coordinates from human, originally mapped on the genome release hg18, were converted in their corresponding location in the release hg19 using the liftOver tool available on the UCSC website (Meyer et al. 2013). Significant enrichment of CpG island association to expressed retrocopies was tested against the ratio of CpG islands mapping up to 14 kbp (corresponding to the maximum distance between an expressed retrocopy and its CpG island-derived promoter) upstream of non-expressed retrocopy loci.

*Motif-enrichment analysis*: Novel promoters (1 kbp upstream, not repeat-masked) were tested for enrichment of known and novel sequence motifs against 1 kbp upstream sequences of not-expressed retrocopies using the HOMER software with standard settings (Heinz et al. 2010).

*Co-option of enhancer sequences*: to test for co-option of enhancer elements as novel retrocopy promoters, we determined the integration loci of rat-specific retrocopies and extracted H3K4me1 and H3K27ac ChIP-seq coverage from the corresponding syntenic regions in the mouse genome. We limited the analysis to this pair of species since ChIP-seq data from all six organs used in our study were available only for mouse, and since the sequence divergence between mouse and other species was too high to perform other comparisons. We aligned up- and downstream sequences of rat-specific retrocopies (specifically, we mapped the sequences at -1000 bp to -500 bp relative to the transcript start and +500 bp to +1000 bp relative to the transcript end to avoid retroposed sequences not transcribed) on the mouse genome using BLAT (Kent 2002), and defined their corresponding loci in mouse when both sequences aligned at least partially on the mouse syntenic region (minimum combined alignment length > 500 bp). Rat retrocopy alignment was also performed to ensure the absence of the copy in mouse. Genome-wide per-base H3K4me1 and H3K27ac ChIP-seq coverage was combined across replicates and organs using the BEDtools suite (Quinlan and Hall 2010). We then compared the mean per-base coverage of ChIP-seq and RNA-seq data between the syntenic integration loci of expressed and non-expressed (not covered by uniquely mapping RNA-seq reads) rat retrocopies using a Mann-Whitney *U* test. To remove potential sequencing biases in the ChIP-seq data, we divided the H3K4me1 and H3K27ac read counts at all integration sites by the input read count. Additionally, we calculated input-normalized read counts from H3K4me3 and PolII ChIP-seq experiments to ascertain the absence of pre-existing active promoters at the integration sites of rat-specific retrocopies. Finally, we evaluated the presence of H3K4me1/H3K27ac peaks, defined using MACS (see above), in these regions by overlapping their genomic coordinates using the BEDtools suite.

**Testing retrocopy families for sequence conservation**

Sequence conservation analyses were performed on intact families, i.e. families where all included retrocopies preserved at least 70% of the original open reading frame uninterrupted by frameshift or nonsense mutations. If only one retrocopy in the family had a disrupted open reading frame, it was removed and the analysis performed on the remaining copies. The selection test was performed on each family by including all retrocopies, one parental gene (the one with the highest similarity to its retrocopy), and the orthologous parental gene from the closest outgroup species. The outgroup parent was determined by aligning (using *fasta*) the parental genes against all protein coding cDNAs from the outgroup species and choosing the gene with the lowest e-value and an identity > 50% with the parental gene. We then obtained the codon-based multiple alignment of retrocopy and outgroup coding sequences using ClustalW (Larkin et al. 2007) and PAL2NAL (Suyama et al. 2006), and reconstructed the phylogenetic tree of all sequences based on the known phylogeny. Finally, we performed the following selection tests:

*codeml analysis*: Retrocopy families under purifying selection were identified using the branch-model test implemented in codeml (Yang 2007). The log-likelihood values of two alternative models (a single *d*N/*d*S estimated for the whole retrocopy clade vs a *d*N/*d*S of 1) were compared through a likelihood-ratio test (LRT). We defined as retrogene families those characterized by a *d*N/*d*S ratio significantly smaller than 1 (Benjamini-Hochberg corrected *P* < 0.05).

*ReEVOLVER analysis*: additional primate-specific retrocopies under purifying selection were identified by repeatedly simulating their neutral evolution with ReEVOLVER (Dupanloup and Kaessmann 2006) and then evaluating the probability of open reading frame preservation. For each family, we performed 10000 simulations, in which we reconstructed the ancestral sequences through maximum likelihood using a mutation rate of 0.001 per site per million years, fixed mutation rated for CpG sites, an indel rate of 0.0001 per site per million years and a Poisson process to define indel number. We defined as retrogene families those characterized by a disablement-accumulation Benjamini-Hochberg corrected probability < 0.05.

**Testing individual retrocopies for sequence conservation**

We tested for purifying selection all retrocopies not grouped into multispecies orthologous families (i.e., species-specific retrocopies or retrocopies whose orthology relationships could not be unambiguously determined) to retrieve additional retrogenes. To this aim, we aligned each intact retrocopy with its parental gene and its ortholog in mouse (for all primate retrocopies) or human (for other species) and then tested the retrocopy branch for signatures of purifying selection using the branch-model test implemented in *codeml* (see above). All retrocopies with a *d*N/*d*S ratio significantly smaller than 1 (Bonferroni-corrected LRT *P* < 0.05) were included in the list of retrogenes.

**Testing the testis-specific retrogenes loss and the “out of testis” scenarios**

As we observed that the proportions of broadly expressed retrogene families increase with increasing family age, while proportions of testis-specific genes decrease (Fig. 4B,C), we reasoned that this pattern could be explained by different scenarios: the “out of testis”, the selective loss of testis specific retrogenes, or the selective preservation of broadly expressed ones. We thus looked for evidence supporting any of these scenarios by employing different approaches.

To test whether retrogene copies would be more often lost in testis-specific families, we evaluated the sequence loss (due to gene deletion or sequence degeneration) of copies from testis-specific and broadly expressed gene families in one or more of the extant species. We manually inspected eutherian, therian, mammalian and vertebrate retrogene families, and in cases in which an annotated retrogene was missing in any species (33 families in total) we investigated the presence of its sequence using the liftOver tool from the UCSC website. We could not assess the presence/absence of 4 copies (2 in opossum and 2 in platypus) due to large assembly gaps or to the fragmented nature of the platypus genome. In the remaining 29/33 cases we always found the retrocopy sequence in all species that were part of the cluster. In these cases, the lack of an annotated copy in our retrogene families was either due to small assembly gaps hampering the annotation of the retrocopy, or by the removal of the retrocopy from the cluster do to ambiguous 1-to-many or many-to-many relationships with retrocopies from other clusters (as also described in the Methods section “Dating of retroposition events”).

To test whether the retrogene loss in one or more species was not due to the absence of its sequence, but rather to the potential loss of function, we then evaluated whether any retrogene family experienced a loss of expression in one or more lineages. To be sure that an eventual loss of expression could not be attributed to the lack of a reconstructed transcript, we inspected both our FPKM values and the read coverage of the retrocopy (which is independent of the transcript assembly). Also in this case, we did not observe any loss of expression, indicating that no retrogene family seems to have been specifically lost in any lineage of the analyzed species.

Finally, we assessed whether we could trace shifts in tissue-specificity (from broad expression to testis-specific, or vice-versa) of individual family retrogene family members in specific species/lineages. We did not detect such cases, which implies that the shifts in the expression profile of genes from testis-specific to broad, as indicated by our age distributions of tissue-specific expression patterns and as postulated in the “out of testis” hypothesis, probably preceded the divergence of the analyzed lineages/species or occurred independently in all lineages/species during their evolution. We note that most branches/lineages investigated in our study are long, which may render the chance to actually trace lineage-specific shifts low.

**REFERENCES**

Altschul SF, Madden TL, Schäffer a a, Zhang J, Zhang Z, Miller W, Lipman DJ. 1997. Gapped BLAST and PSI-BLAST: a new generation of protein database search programs. *Nucleic Acids Res* **25**: 3389–402.

Bellott DW, Hughes JF, Skaletsky H, Brown LG, Pyntikova T, Cho T-J, Koutseva N, Zaghlul S, Graves T, Rock S, et al. 2014. Mammalian Y chromosomes retain widely expressed dosage-sensitive regulators. *Nature* **508**: 494–9.

Cortez D, Marin R, Toledo-Flores D, Froidevaux L, Liechti A, Waters PD, Grützner F, Kaessmann H. 2014. Origins and functional evolution of Y chromosomes across mammals. *Nature* **508**: 488–93.

Dupanloup I, Kaessmann H. 2006. Evolutionary simulations to detect functional lineage-specific genes. *Bioinformatics* **22**: 1815–22.

Flicek P, Amode MR, Barrell D, Beal K, Brent S, Carvalho-Silva D, Clapham P, Coates G, Fairley S, Fitzgerald S, et al. 2012. Ensembl 2012. *Nucleic Acids Res* **40**: D84–90.

Forrest ARR, Kawaji H, Rehli M, Baillie JK, de Hoon MJL, Lassmann T, Itoh M, Summers KM, Suzuki H, Daub CO, et al. 2014. A promoter-level mammalian expression atlas. *Nature* **507**: 462–70.

Heinz S, Benner C, Spann N, Bertolino E, Lin YC, Laslo P, Cheng JX, Murre C, Singh H, Glass CK. 2010. Simple Combinations of Lineage-Determining Transcription Factors Prime cis-Regulatory Elements Required for Macrophage and B Cell Identities. *Mol Cell* **38**: 576–589.

Hughes JF, Skaletsky H, Koutseva N, Pyntikova T, Page DC. 2015. Sex chromosome-to-autosome transposition events counter Y-chromosome gene loss in mammals. *Genome Biol* **16**: 1–9.

Illingworth RS, Gruenewald-Schneider U, Webb S, Kerr ARW, James KD, Turner DJ, Smith C, Harrison DJ, Andrews R, Bird AP. 2010. Orphan CpG Islands Identify numerous conserved promoters in the mammalian genome. *PLoS Genet* **6**.

Kent WJ. 2002. BLAT — The BLAST -Like Alignment Tool. *Genome Res* **12**: 656–664.

Larkin M a, Blackshields G, Brown NP, Chenna R, McGettigan P a, McWilliam H, Valentin F, Wallace IM, Wilm a, Lopez R, et al. 2007. Clustal W and Clustal X version 2.0. *Bioinformatics* **23**: 2947–8.

Marques AC, Dupanloup I, Vinckenbosch N, Reymond A, Kaessmann H. 2005. Emergence of young human genes after a burst of retroposition in primates. *PLoS Biol* **3**: e357.

Meyer LR, Zweig AS, Hinrichs AS, Karolchik D, Kuhn RM, Wong M, Sloan C a., Rosenbloom KR, Roe G, Rhead B, et al. 2013. The UCSC Genome Browser database: Extensions and updates 2013. *Nucleic Acids Res* **41**: 64–69.

Necsulea A, Soumillon M, Warnefors M, Liechti A, Daish T, Zeller U, Baker JC, Grützner F, Kaessmann H. 2014. The evolution of lncRNA repertoires and expression patterns in tetrapods. *Nature* **505**: 635–40.

Pearson WR, Lipman DJ. 1988. Improved tools for biological sequence comparison. *Proc Natl Acad Sci U S A* **85**: 2444–8.

Quinlan AR, Hall IM. 2010. BEDTools: a flexible suite of utilities for comparing genomic features. *Bioinformatics* **26**: 841–2.

Suyama M, Torrents D, Bork P. 2006. PAL2NAL: robust conversion of protein sequence alignments into the corresponding codon alignments. *Nucleic Acids Res* **34**: W609–12.

Yang Z. 2007. PAML 4: phylogenetic analysis by maximum likelihood. *Mol Biol Evol* **24**: 1586–91.
