# Supplementary material for: The life history of retrocopies illuminates the evolution of new mammalian genes
Source: HighWire-hosted journal article supplement (doi:10.1101/gr.198473.115), 2016-01-04
Supplement: Supplemental_Tables.zip [file Supplemental_Table_S1.xlsx]

## Sheet: Human
# Supplemental Table S1: Retrocopy annotation in human (genome assembly version: GRCh37)
# annotated_retro_ID refers to the annotated Ensembl65 transcript overlapping most of the retrocopy locus
# Parental id% refers to the identity between the FASTY translated retrocopy and annotated parental protein
# dS values could not be calculated for retrocopies identified using parental proteins from other species
retro_ID	annotated_retro_ID	chr	start	end	strand	parental_protein	parental_gene	parental_chr	parental_id%	dS	comments
hsa_retrom00007	ENST00000442116	1	228295	228654	-	ENSP00000389103	ENSG00000198242	17	0.848	0.1974
hsa_retrop00052	ENST00000458203	1	470987	471366	+	ENSP00000389103	ENSG00000198242	17	0.85	0.207
hsa_retrom00065	ENST00000433407	1	6894403	6894660	-	ENSP00000274242	ENSG00000145592	5	0.791	0.1231
hsa_retrom00070	ENST00000399343	1	8117306	8118008	-	ENSP00000361076	ENSG00000148303	9	0.85	0.1827
hsa_retrop00112	ENST00000437586	1	8810535	8811158	+	ENSP00000339795	ENSG00000147604	8	0.876	0.0842
hsa_retrom00076	ENST00000428803	1	8846259	8846949	-	ENSP00000339795	ENSG00000147604	8	0.871	0.0898
hsa_retrop00114	hsa_retrop00114	1	8891110	8891453	+	ENSP00000389103	ENSG00000198242	17	0.723	0.288
hsairetrop00161	ENST00000425872	1	8953488	8953871	+	ENSGGOP00000000955	ENSGGOG00000000971	1	0.933	NA
hsa_retrop00131	ENST00000435277	1	9636485	9637040	+	ENSP00000400467	ENSG00000163682	4	0.802	0.0935
hsairetrom00135	ENST00000426570	1	9722358	9722686	-	ENSMMUP00000011468	ENSMMUG00000003448	16	0.669	NA
hsa_retrom00091	ENST00000456484	1	10114501	10114831	-	ENSP00000351021	ENSG00000122026	13	0.699	0.1081
hsa_retrom00154	ENST00000317869	1	12907264	12908142	-	ENSP00000451176	ENSG00000092199	14	0.908	0.0945
hsa_retrom00197	ENST00000449855	1	13182994	13183872	-	ENSP00000451176	ENSG00000092199	14	0.881	0.0952
hsa_retrom00218	ENST00000416175	1	15018625	15018909	-	ENSP00000429083	ENSG00000171530	5	0.832	0.1683
hsa_retrom00226	ENST00000400795	1	15518376	15518913	-	ENSP00000386641	ENSG00000168958	2	0.777	0.2246
hsa_retrop00176	ENST00000431782	1	16119299	16119781	+	ENSP00000354739	ENSG00000197958	9	0.92	0.0936
hsa_retrom00231	ENST00000538385	1	16133872	16134144	-	ENSP00000309565	ENSG00000173660	1	0.967	0.0077
hsa_retrop00178	ENST00000321418	1	16154727	16155164	+	ENSP00000251453	ENSG00000105193	19	0.925	0.0887
hsa_retrom00242	ENST00000445689	1	16695672	16695965	-	ENSP00000346088	ENSG00000116251	1	0.848	0.1024
hsa_retrom00277	ENST00000419267	1	17012182	17012475	-	ENSP00000368912	ENSG00000173674	X	0.978	0.0208
hsairetrom00318	ENST00000441355	1	18839558	18839887	-	ENSGGOP00000008597	ENSGGOG00000008793	12	0.874	NA
hsa_retrop00208	ENST00000457263	1	19934608	19935027	+	ENSP00000311028	ENSG00000164587	5	0.936	0.0802
hsa_retrop00221	ENST00000443195	1	20852516	20853234	+	ENSP00000362744	ENSG00000198034	X	0.772	0.2333
hsa_retrom00289	ENST00000420703	1	21330077	21330428	-	ENSP00000318646	ENSG00000134419	16	0.711	0.3373
hsa_retrop00223	ENST00000537790	1	21724486	21724776	+	ENSP00000365963	ENSG00000204619	6	0.938	0.0671
hsa_retrom00310	ENST00000455962	1	21786158	21786536	-	ENSP00000225655	ENSG00000108518	17	0.77	0.2554
hsa_retrop00256	ENST00000398929	1	22234591	22235070	+	ENSP00000370574	ENSG00000122026	13	0.919	0.0262
hsa_retrom00324	ENST00000487348	1	22649342	22649824	-	ENSP00000419425	ENSG00000196262	7	0.818	0.1257
hsa_retrop00288	ENST00000442089	1	23571258	23571721	+	ENSP00000417048	ENSG00000162244	3	0.855	0.0546
hsa_retrop00298	ENST00000445848	1	23737325	23737635	+	ENSP00000419579	ENSG00000106028	7	0.705	0.0885
hsa_retrom00624	ENST00000412176	1	24227964	24229227	-	ENSP00000376337	ENSG00000184887	14	0.929	0.1296
hsa_retrom00645	ENST00000421430	1	24275508	24275873	-	ENSP00000355778	ENSG00000163041	1	0.869	0.0634
hsa_retrom00666	ENST00000414693	1	25620658	25621134	-	ENSP00000364699	ENSG00000204370	11	0.962	0.0131
hsa_retrop00320	ENST00000419297	1	25725212	25725688	+	ENSP00000364699	ENSG00000204370	11	0.969	0.0067
hsa_retrop00322	ENST00000440710	1	26213851	26214072	+	ENSP00000266735	ENSG00000139343	12	0.813	0.1811
hsa_retrom00672	hsa_retrom00672	1	26589606	26589889	-	ENSP00000382250	ENSG00000243927	21	0.711	0.191
hsa_retrop00331	ENST00000434718	1	26653178	26653527	+	ENSP00000378163	ENSG00000109475	4	0.778	0.0989
hsa_retrom00679	ENST00000446498	1	26781184	26781678	-	ENSP00000397798	ENSG00000215472	18	0.909	0.0575
hsa_retrom00680	ENST00000418220	1	26845848	26846741	-	ENSP00000417710	ENSG00000163530	3	0.896	0.0698
hsa_retrop00372	ENST00000339276	1	27189707	27190438	+	ENSP00000379281	ENSG00000164924	8	0.722	14.5238
hsa_retrop00375	ENST00000310055	1	27306656	27307012	+	ENSP00000354739	ENSG00000197958	9	0.908	0.158
hsa_retrom00683	ENST00000437956	1	27312391	27312831	-	ENSP00000354676	ENSG00000198856	4	0.893	0.1727
hsa_retrop00382	ENST00000457038	1	27503242	27503765	+	ENSP00000222247	ENSG00000105640	19	0.886	0.2338
hsa_retrom00694	ENST00000446783	1	27527327	27527949	-	ENSP00000262570	ENSG00000106554	7	0.947	0.0386
hsa_retrop00388	ENST00000449818	1	27533421	27534281	+	ENSP00000296930	ENSG00000181163	5	0.925	0.0368
hsa_retrom00703	ENST00000445563	1	28013363	28013903	-	ENSP00000253475	ENSG00000131165	16	0.647	0.1774
hsa_retrop00398	ENST00000446554	1	28065621	28065947	+	ENSP00000250101	ENSG00000129235	17	0.804	0.2073
hsa_retrop00415	ENST00000425462	1	28066465	28067137	+	ENSP00000352401	ENSG00000197713	2	0.785	0.1679
hsa_retrom00715	ENST00000436160	1	28422256	28422840	-	ENSP00000263672	ENSG00000118363	11	0.995	0
hsa_retrom00719	hsa_retrom00719	1	28447346	28447973	-	ENSP00000414192	ENSG00000134108	3	0.857	0.0668
hsa_retrom00728	hsa_retrom00728	1	30377803	30378204	-	ENSP00000335636	ENSG00000173418	20	0.579	0.4482
hsairetrop00609	ENST00000417263	1	31509618	31510093	+	ENSMUSP00000022135	ENSMUSG00000078941	13	0.637	NA
hsa_retrom00737	ENST00000441274	1	31580994	31581471	-	ENSP00000346027	ENSG00000122026	13	0.869	0.0917
hsa_retrom00743	ENST00000401075	1	31960438	31961652	-	ENSP00000339053	ENSG00000156508	6	0.74	0.2273
hsa_retrom00756	ENST00000444107	1	32867713	32868707	-	ENSP00000229239	ENSG00000111640	12	0.711	0.3549
hsa_retrop00468	ENST00000395888	1	33445546	33446070	+	ENSP00000222247	ENSG00000105640	19	0.812	0.2894
hsa_retrop00469	ENST00000447420	1	33452732	33453224	+	ENSP00000433034	ENSG00000140988	16	0.797	0.6841
hsa_retrom00761	ENST00000424879	1	33977652	33978343	-	ENSP00000390491	ENSG00000100567	14	0.752	0.2983
hsairetrop00673	NA	1	34304122	34305694	+	ENSGGOP00000008081	ENSGGOG00000008267	2b	0.611	NA
hsa_retrop00537	ENST00000434805	1	35816323	35817205	+	ENSP00000359345	ENSG00000122406	1	0.875	0.0683
hsairetrop00729	ENST00000437933	1	38010403	38010880	+	ENSMUSP00000025563	ENSMUSG00000024661	19	0.83	NA
hsa_retrop00553	ENST00000473049	1	38243835	38245091	+	ENSP00000411187	ENSG00000130402	19	0.686	1.0221
hsa_retrom00786	hsa_retrom00786	1	38247912	38248557	-	ENSP00000379201	ENSG00000100483	14	0.855	0.1004
hsa_retrop00557	ENST00000447422	1	38306637	38307352	+	ENSP00000341885	ENSG00000140988	16	0.74	0.5673
hsa_retrop00583	ENST00000442006	1	39174671	39176561	+	ENSP00000324173	ENSG00000044574	9	0.905	0.0613
hsairetrom00680	ENST00000406997	1	39769969	39770220	-	ENSMUSP00000074724	ENSMUSG00000073676	1	0.869	NA
hsa_retrop00593	ENST00000447263	1	39980628	39982159	+	ENSP00000425348	ENSG00000083720	5	0.77	1.5743
hsa_retrop00599	ENST00000497982	1	40183700	40184265	+	ENSP00000428000	ENSG00000147419	8	0.9	0.0371
hsa_retrom00812	ENST00000327582	1	40235377	40236927	-	ENSP00000196371	ENSG00000083720	5	0.744	2.8761
hsa_retrop00603	ENST00000438210	1	40428378	40429073	+	ENSP00000341885	ENSG00000140988	16	0.929	0.1376
hsa_retrop00605	ENST00000430724	1	40598434	40599091	+	ENSP00000314813	ENSG00000104904	19	0.796	0.2036
hsa_retrom00821	ENST00000430225	1	40798751	40799230	-	ENSP00000370569	ENSG00000122026	13	0.938	0.0381
hsa_retrom00822	ENST00000445825	1	41059413	41060025	-	ENSP00000340823	ENSG00000188342	13	0.62	0.8392
hsa_retrom00832	ENST00000427711	1	41730223	41730549	-	ENSP00000404375	ENSG00000241343	X	0.679	0.2273
hsa_retrop01006	ENST00000391730	1	42506701	42507296	+	ENSP00000428620	ENSG00000169045	5	0.547	11.8984
hsairetrop00852	ENST00000434936	1	42606678	42607050	+	ENSPPYP00000005960	ENSPPYG00000005233	13	0.676	NA
hsa_retrom00837	ENST00000411908	1	42878072	42878413	-	ENSP00000318646	ENSG00000134419	16	0.774	0.1855
hsa_retrop01021	ENST00000426743	1	42957410	42958166	+	ENSP00000346050	ENSG00000145425	4	0.773	0.1488
hsairetrom00748	ENST00000536927	1	42965879	42966082	-	ENSGGOP00000006307	ENSGGOG00000006450	X	0.956	NA
hsa_retrom00848	ENST00000417517	1	43356768	43357999	-	ENSP00000417863	ENSG00000133606	7	0.86	0.091
hsa_retrop01035	ENST00000439215	1	43368903	43369577	+	ENSP00000253413	ENSG00000131100	22	0.907	0.0782
hsa_retrop01045	ENST00000427515	1	44209102	44209386	+	ENSP00000405965	ENSG00000188612	17	0.674	0.2996
hsa_retrom00872	ENST00000419974	1	44315973	44317405	-	ENSP00000318868	ENSG00000176974	17	0.872	0.1723
hsa_retrom00887	ENST00000434244	1	44569027	44570211	-	ENSP00000447402	ENSG00000170421	12	0.859	0.2241
hsa_retrom00891	ENST00000423265	1	44620635	44620974	-	ENSP00000381960	ENSG00000214788	11	0.69	0.2579
hsa_retrom00894	hsa_retrom00894	1	44653644	44654323	-	ENSP00000423302	ENSG00000177034	5	0.711	0.3594
hsa_retrom00898	ENST00000455333	1	45246001	45246387	-	ENSP00000318646	ENSG00000134419	16	0.938	0.0522
hsa_retrop01063	ENST00000428976	1	45424229	45424897	+	ENSP00000381229	ENSG00000100814	14	0.879	0.0582
hsa_retrom00917	ENST00000411837	1	45453909	45454397	-	ENSP00000419425	ENSG00000196262	7	0.878	0.1206
hsa_retrom00921	ENST00000425293	1	45535652	45536101	-	ENSP00000354676	ENSG00000198856	4	0.893	0.0905
hsa_retrom00928	ENST00000432472	1	46111491	46111828	-	ENSP00000318646	ENSG00000134419	16	0.8	0.2494
hsa_retrom00930	ENST00000437848	1	46116750	46117416	-	ENSP00000361076	ENSG00000148303	9	0.842	0.1641
hsa_retrop01081	ENST00000399997	1	46246949	46247629	+	ENSP00000403172	ENSG00000089009	12	0.921	0.0732
hsa_retrom00934	ENST00000413187	1	46312667	46313283	-	ENSP00000351380	ENSG00000198498	4	0.854	0.1069
hsa_retrom00937	ENST00000271139	1	47078559	47078957	-	ENSP00000386782	ENSG00000114978	2	0.504	67.6693
hsairetrop00975	ENST00000419949	1	47207883	47208798	+	ENSMUSP00000020529	ENSMUSG00000020288	11	0.713	NA
hsa_retrop01117	ENST00000437364	1	47357293	47358502	+	ENSP00000301072	ENSG00000167553	12	0.757	0.3099
hsa_retrom00949	ENST00000413752	1	47963567	47964014	-	ENSP00000370574	ENSG00000122026	13	0.753	0.3781
hsa_retrom00951	ENST00000452549	1	48790753	48791795	-	ENSP00000311677	ENSG00000117751	1	0.809	0.0921
hsa_retrop01133	ENST00000412769	1	48901639	48902892	+	ENSP00000194530	ENSG00000082146	2	0.974	0.0145
hsa_retrom00957	ENST00000416622	1	48962940	48963408	-	ENSP00000370569	ENSG00000122026	13	0.783	0.3446
hsa_retrop01368	ENST00000414530	1	50791963	50792682	+	ENSP00000341885	ENSG00000140988	16	0.912	0.1665
hsairetrom00928	ENST00000435986	1	50864612	50865015	-	ENSGGOP00000028322	ENSGGOG00000026764	13	0.809	NA
hsa_retrom00965	ENST00000456841	1	50871104	50871696	-	ENSP00000344393	ENSG00000119616	14	0.894	0.0704
hsa_retrop01375	ENST00000453979	1	51246012	51246532	+	ENSP00000407828	ENSG00000167085	17	0.697	0.273
hsa_retrom00984	ENST00000440986	1	51623646	51624143	-	ENSP00000309629	ENSG00000172757	11	0.867	0.1626
hsa_retrom00988	ENST00000480705	1	51716273	51716992	-	ENSP00000341885	ENSG00000140988	16	0.95	0.112
hsa_retrop01381	ENST00000422197	1	51837936	51838776	+	ENSP00000219313	ENSG00000103035	16	0.806	0.249
hsa_retrom00994	ENST00000426454	1	52172810	52173818	-	ENSP00000380070	ENSG00000111640	12	0.749	0.432
hsa_retrop01385	ENST00000424829	1	52174755	52175611	+	ENSP00000370808	ENSG00000169100	X	0.699	1.3865
hsa_retrop01386	ENST00000442453	1	52325439	52325806	+	ENSP00000355299	ENSG00000198860	1	0.78	0.2552
hsa_retrop01391	ENST00000429744	1	52645518	52646223	+	ENSP00000264254	ENSG00000115539	2	0.874	0.0731
hsa_retrop01400	ENST00000395991	1	52719293	52719851	+	ENSP00000423995	ENSG00000164162	4	0.909	0.0965
hsa_retrop01403	ENST00000497678	1	52834402	52834914	+	ENSP00000243501	ENSG00000123739	4	0.936	0.0313
hsa_retrom01001	ENST00000437890	1	53237844	53238320	-	ENSP00000435777	ENSG00000110700	11	0.94	0.0232
hsa_retrom01027	ENST00000427081	1	53409209	53409571	-	ENSP00000355781	ENSG00000163041	1	0.792	0.1216
hsa_retrom01058	ENST00000414168	1	53458871	53459374	-	ENSP00000437547	ENSG00000133818	11	0.982	0.0212
hsa_retrop01437	ENST00000427668	1	53460398	53461650	+	ENSP00000379672	ENSG00000196230	6	0.787	0.2915
hsa_retrom01063	ENST00000438361	1	53538785	53539083	-	ENSP00000398064	ENSG00000181061	3	0.78	0.2893
hsa_retrom01069	ENST00000443844	1	53904099	53904889	-	ENSP00000447740	ENSG00000075415	12	0.688	9.8294
hsa_retrop01440	ENST00000433953	1	54307218	54307474	+	ENSP00000274242	ENSG00000145592	5	0.674	0.1682
hsa_retrom01074	ENST00000437410	1	54441147	54441692	-	ENSP00000447782	ENSG00000135486	12	0.814	3.1745
hsa_retrop01451	ENST00000444055	1	54555529	54555768	+	ENSP00000417656	ENSG00000131174	X	0.825	0.0965
hsa_retrop01457	ENST00000427917	1	55002469	55003050	+	ENSP00000447260	ENSG00000135486	12	0.897	0.0901
hsa_retrop01466	ENST00000449769	1	55688052	55689042	+	ENSP00000296048	ENSG00000163754	3	0.901	0.0941
hsa_retrop01468	ENST00000440922	1	55833138	55834164	+	ENSP00000245206	ENSG00000125166	16	0.699	0.2664
hsa_retrom01084	ENST00000441455	1	56673245	56674128	-	ENSP00000346067	ENSG00000168028	3	0.736	0.2874
hsa_retrop01473	ENST00000446654	1	57004124	57004580	+	ENSP00000434298	ENSG00000122026	13	0.82	0.0844
hsa_retrom01090	ENST00000434808	1	58071522	58071878	-	ENSP00000009589	ENSG00000008988	8	0.807	0.1886
hsa_retrom01093	ENST00000394002	1	58514383	58514963	-	ENSP00000447260	ENSG00000135486	12	0.892	0.1082
hsa_retrom01098	ENST00000371225	1	59041860	59042756	-	ENSP00000263735	ENSG00000119888	2	0.507	69.7534
hsa_retrom01100	ENST00000427762	1	59096516	59097198	-	ENSP00000362548	ENSG00000004455	1	0.961	0.0155
hsa_retrop01480	ENST00000412562	1	59465348	59466163	+	ENSP00000300408	ENSG00000167085	17	0.901	0.0854
hsa_retrop01484	ENST00000444290	1	62504550	62504780	+	ENSP00000435085	ENSG00000134248	1	0.899	0.1061
hsa_retrop01485	ENST00000439294	1	62656194	62656600	+	ENSP00000318646	ENSG00000134419	16	0.704	0.2281
hsa_retrom01106	ENST00000258651	1	63106791	63107347	-	ENSP00000375730	ENSG00000142541	19	0.793	0.4221
hsa_retrop01487	ENST00000429660	1	63727784	63728378	+	ENSP00000410848	ENSG00000168028	3	0.707	0.2902
hsa_retrom01109	ENST00000455736	1	63825468	63826850	-	ENSP00000406463	ENSG00000168259	17	0.813	0.1795
hsairetrom01107	ENST00000418154	1	64254389	64254975	-	ENSPPYP00000009543	ENSPPYG00000008492	17	0.862	NA
hsa_retrom01128	ENST00000440942	1	64308865	64309347	-	ENSP00000432660	ENSG00000172757	11	0.827	0.2188
hsa_retrop01489	ENST00000442855	1	65384174	65384365	+	ENSP00000339720	ENSG00000189043	7	0.719	0.1356
hsa_retrom01150	ENST00000331747	1	65450348	65451787	-	ENSP00000075120	ENSG00000059804	12	0.84	0.1391
hsa_retrom01154	ENST00000426714	1	66041810	66043258	-	ENSP00000393399	ENSG00000178234	7	0.751	0.2587
hsa_retrom01186	ENST00000426952	1	68125983	68126698	-	ENSP00000452021	ENSG00000092199	14	0.785	0.2473
hsa_retrop01499	ENST00000435784	1	68509053	68509917	+	ENSP00000368552	ENSG00000124523	6	0.653	0.2673
hsa_retrom01206	ENST00000422584	1	68627440	68628773	-	ENSP00000357816	ENSG00000175029	10	0.932	0.1006
hsa_retrom01210	ENST00000444127	1	68708160	68708738	-	ENSP00000339095	ENSG00000171863	2	0.938	0.0681
hsa_retrop01500	ENST00000430845	1	68748071	68748303	+	ENSP00000246554	ENSG00000126267	19	0.646	0.3869
hsa_retrom01221	ENST00000443918	1	68980094	68980356	-	ENSP00000363641	ENSG00000136810	9	0.674	0.1956
hsa_retrop01502	ENST00000412108	1	70385040	70385520	+	ENSP00000247970	ENSG00000127445	19	0.871	0.2384
hsa_retrop01508	ENST00000456361	1	70996209	70996616	+	ENSP00000436945	ENSG00000110172	11	0.942	0.1166
hsa_retrom01228	ENST00000446037	1	71126346	71126944	-	ENSP00000311032	ENSG00000164305	4	0.825	0.1283
hsa_retrop01522	ENST00000422587	1	72767196	72767510	+	ENSP00000386681	ENSG00000071082	2	0.766	0.0789
hsa_retrop01537	ENST00000430398	1	73570475	73571964	+	ENSP00000449404	ENSG00000170421	12	0.796	0.2825
hsa_retrop01550	ENST00000413677	1	76047781	76048136	+	ENSP00000417048	ENSG00000162244	3	0.882	0.1045
hsa_retrop01553	ENST00000420977	1	77165441	77166220	+	ENSP00000229270	ENSG00000111669	12	0.965	0.0266
hsa_retrop01557	ENST00000535687	1	77594799	77595350	+	ENSP00000389465	ENSG00000215472	18	0.989	0.0102
hsa_retrom01272	ENST00000431536	1	78239553	78240564	-	ENSP00000331514	ENSG00000184009	17	0.806	1.2739
hsa_retrom01276	ENST00000406534	1	78276549	78277466	-	ENSP00000339161	ENSG00000186063	1	0.993	0
hsa_retrop01560	ENST00000444067	1	78312793	78313981	+	ENSP00000378303	ENSG00000126653	17	0.904	0.0876
hsa_retrom01277	ENST00000265259	1	78509067	78509817	-	ENSP00000377696	ENSG00000114021	3	0.769	0.1711
hsa_retrop01567	ENST00000448345	1	78557183	78557680	+	ENSP00000265044	ENSG00000114850	3	0.91	0.0945
hsa_retrop01577	ENST00000427236	1	79131956	79132379	+	ENSP00000420311	ENSG00000125691	17	0.695	0.2521
hsa_retrop01582	ENST00000444644	1	79214737	79216366	+	ENSP00000261531	ENSG00000100603	14	0.862	0.0857
hsa_retrom01280	ENST00000439132	1	79520633	79521740	-	ENSP00000365773	ENSG00000135069	9	0.922	0.0726
hsa_retrop01596	ENST00000425922	1	79986753	79987885	+	ENSP00000296412	ENSG00000197894	4	0.872	0.0977
hsa_retrop01613	ENST00000438801	1	80749037	80749538	+	ENSP00000343040	ENSG00000189403	13	0.769	0.3259
hsa_retrom01282	ENST00000411674	1	80917141	80917655	-	ENSP00000447782	ENSG00000135486	12	0.866	0.1187
hsa_retrop01614	ENST00000447525	1	80961588	80961875	+	ENSP00000229379	ENSG00000111775	12	0.792	0.0743
hsairetrom01249	ENST00000417407	1	81563949	81564691	-	ENSGGOP00000021992	ENSGGOG00000008034	8	0.883	NA
hsa_retrop01615	ENST00000426688	1	81674253	81674901	+	ENSP00000363018	ENSG00000198755	6	0.853	0.1813
hsairetrop01368	ENST00000444546	1	81892207	81892835	+	ENSMMUP00000002475	ENSMMUG00000001858	12	0.795	NA
hsa_retrop01621	ENST00000448213	1	81967521	81969151	+	ENSP00000343126	ENSG00000179361	15	0.982	0.0182
hsa_retrom01289	ENST00000438968	1	82061880	82062191	-	ENSP00000427788	ENSG00000008988	8	0.856	0.2124
hsa_retrop01626	ENST00000448052	1	84551424	84551913	+	ENSP00000216185	ENSG00000100348	22	0.849	0.1485
hsa_retrop01627	ENST00000441775	1	84710017	84710209	+	ENSP00000250495	ENSG00000129559	14	0.954	0.1124
hsa_retrom01299	hsa_retrom01299	1	86869867	86870477	-	ENSP00000346063	ENSG00000146223	6	0.706	0.182
hsa_retrop01633	ENST00000447415	1	87250596	87251147	+	ENSP00000389465	ENSG00000215472	18	0.929	0.0324
hsa_retrop01642	ENST00000421785	1	89043530	89043873	+	ENSP00000404375	ENSG00000241343	X	0.783	0.3258
hsa_retrom01308	ENST00000399794	1	89448451	89449506	-	ENSP00000359645	ENSG00000147274	X	0.958	0.0586	parental gene has paralogs on Y chromosome (ENSG00000234414, ENSG00000244395, ENSG00000242875, ENSG00000242389, ENSG00000226941, ENSG00000169800)
hsa_retrom01315	ENST00000439531	1	89569971	89570450	-	ENSP00000262033	ENSG00000110958	12	0.975	0.0636
hsa_retrom01319	ENST00000446360	1	89755362	89756020	-	ENSP00000334848	ENSG00000166352	11	0.887	0.1041
hsa_retrop01659	ENST00000401029	1	89859592	89860219	+	ENSP00000246533	ENSG00000126247	19	0.714	0.327
hsa_retrom01325	ENST00000440817	1	90126773	90127016	-	ENSP00000339720	ENSG00000189043	7	0.817	0.0961
hsa_retrop01689	ENST00000425640	1	91489474	91490363	+	ENSP00000359345	ENSG00000122406	1	0.892	0.0942
hsa_retrom01334	ENST00000361447	1	92000225	92001163	-	ENSP00000296490	ENSG00000164091	3	0.866	0.1193
hsa_retrop01694	ENST00000415545	1	92108292	92109470	+	ENSP00000413047	ENSG00000166598	12	0.898	0.0838
hsa_retrop01696	ENST00000420263	1	92532061	92533321	+	ENSP00000262134	ENSG00000087253	16	0.619	1.3929
hsa_retrom01340	ENST00000485873	1	92540261	92540908	-	ENSP00000361777	ENSG00000119335	9	0.958	0.0496
hsa_retrom01346	ENST00000424043	1	92580362	92581362	-	ENSP00000380068	ENSG00000111640	12	0.801	0.3045
hsa_retrop01700	ENST00000441422	1	92591428	92591961	+	ENSP00000383569	ENSG00000188191	7	0.695	8.5442
hsa_retrom01362	ENST00000441799	1	93112690	93113199	-	ENSP00000410354	ENSG00000029993	X	0.734	0.2043
hsa_retrop01706	ENST00000440471	1	93197619	93198104	+	ENSP00000429167	ENSG00000104231	8	0.789	0.1669
hsa_retrop01709	ENST00000457810	1	93221430	93222512	+	ENSP00000388902	ENSG00000107443	10	0.763	0.247
hsa_retrop01711	ENST00000418249	1	93397194	93397645	+	ENSP00000240488	ENSG00000121211	4	0.766	0.3787
hsa_retrom01368	ENST00000413542	1	93656285	93656638	-	ENSP00000404375	ENSG00000241343	X	0.832	0.1076
hsa_retrop01715	ENST00000429913	1	94767594	94768578	+	ENSP00000380068	ENSG00000111640	12	0.744	0.3452
hsa_retrom01379	ENST00000442943	1	94871953	94872438	-	ENSP00000351021	ENSG00000122026	13	0.687	0.2403
hsa_retrom01382	ENST00000433311	1	95116102	95116711	-	ENSP00000256544	ENSG00000134152	15	0.667	0.3148
hsa_retrop01729	ENST00000415278	1	96912486	96913871	+	ENSP00000339053	ENSG00000156508	6	0.952	0.0419
hsa_retrom01391	ENST00000468715	1	97144433	97145128	-	ENSP00000339795	ENSG00000147604	8	0.996	0
hsairetrop01527	ENST00000457466	1	98051422	98051826	+	ENSMMUP00000011468	ENSMMUG00000003448	16	0.752	NA
hsairetrop01530	hsairetrop01530	1	98542574	98543056	+	ENSGALP00000000045	ENSGALG00000000033	22	0.618	NA
hsa_retrop01739	ENST00000434734	1	100163822	100164210	+	ENSP00000417027	ENSG00000029993	X	0.826	0.1932
hsa_retrop01746	ENST00000443135	1	100564795	100565046	+	ENSP00000418787	ENSG00000214113	6	0.586	0.3084
hsa_retrop01748	ENST00000440440	1	100678849	100679223	+	ENSP00000297290	ENSG00000164713	7	0.904	0.1127
hsa_retrom01393	ENST00000425064	1	100858592	100859214	-	ENSP00000358554	ENSG00000116752	1	0.895	0.0693
hsa_retrom01395	ENST00000455141	1	101052205	101052907	-	ENSP00000361076	ENSG00000148303	9	0.771	0.2701
hsa_retrop01756	ENST00000435130	1	101117449	101117835	+	ENSP00000404375	ENSG00000241343	X	0.774	0.291
hsa_retrom01400	ENST00000425806	1	101406948	101407546	-	ENSP00000447782	ENSG00000135486	12	0.749	0.1587
hsa_retrop01768	ENST00000455561	1	101721838	101722176	+	ENSP00000427788	ENSG00000008988	8	0.895	0.1345
hsa_retrom01412	ENST00000454070	1	101736434	101736924	-	ENSP00000419425	ENSG00000196262	7	0.829	0.1701
hsa_retrom01420	ENST00000431241	1	102251895	102252740	-	ENSP00000346067	ENSG00000168028	3	0.975	0.0227
hsa_retrom01425	ENST00000396543	1	103565696	103566204	-	ENSP00000356022	ENSG00000112096	6	0.615	0.4923
hsa_retrop01785	ENST00000425123	1	104112175	104113293	+	ENSP00000331514	ENSG00000184009	17	0.813	0.479
hsa_retrom01429	ENST00000432567	1	104695931	104696452	-	ENSP00000366525	ENSG00000087086	19	0.651	0.3215
hsa_retrop01802	ENST00000454213	1	105976929	105977448	+	ENSP00000439076	ENSG00000135446	12	0.743	0.24
hsa_retrop01817	ENST00000415279	1	106434361	106436139	+	ENSP00000426743	ENSG00000015479	5	0.907	0.0805
hsa_retrom01432	hsa_retrom01432	1	107086964	107087281	-	ENSP00000359384	ENSG00000203907	6	0.64	0.2574
hsa_retrop01821	ENST00000416095	1	108047825	108048067	+	ENSP00000339720	ENSG00000189043	7	0.926	0.0004
hsa_retrop01834	ENST00000453250	1	109045143	109045595	+	ENSP00000438660	ENSG00000100380	22	0.766	0.1869
hsa_retrop01837	ENST00000428364	1	109051268	109051864	+	ENSP00000346063	ENSG00000146223	6	0.698	0.1116
hsa_retrop01841	ENST00000538262	1	109534904	109535455	+	ENSP00000389465	ENSG00000215472	18	0.984	0.0051
hsa_retrop01850	ENST00000427731	1	109589448	109590096	+	ENSP00000446215	ENSG00000132341	12	0.799	0.1989
hsa_retrop01869	ENST00000411964	1	110194042	110194719	+	ENSP00000339795	ENSG00000147604	8	0.849	0.1192
hsairetrom01520	NA	1	110353265	110353620	-	ENSPTRP00000047122	ENSPTRG00000019637	7	0.667	NA
hsa_retrop01879	hsa_retrop01879	1	110799352	110799549	+	ENSP00000330730	ENSG00000183513	2	0.726	0.1894
hsa_retrom01482	ENST00000432731	1	111390702	111391617	-	ENSP00000277746	ENSG00000148572	10	0.951	0.0285
hsa_retrop01885	ENST00000427832	1	111922889	111923173	+	ENSP00000408289	ENSG00000181061	3	0.848	0.1065
hsa_retrom01490	ENST00000443599	1	112190914	112191904	-	ENSP00000373489	ENSG00000111057	12	0.837	0.1602
hsa_retrop01890	ENST00000454560	1	112905893	112906144	+	ENSP00000363641	ENSG00000136810	9	0.738	0.4318
hsa_retrom01495	ENST00000414323	1	113168513	113168847	-	ENSP00000258105	ENSG00000204822	2	0.646	0.7102
hsa_retrop01894	ENST00000458353	1	113290717	113291094	+	ENSP00000219169	ENSG00000102898	16	0.874	0.1856
hsa_retrop01899	ENST00000460134	1	113465989	113466960	+	ENSP00000355377	ENSG00000162482	1	0.82	0.1531
hsa_retrop01900	ENST00000457967	1	113711616	113712022	+	ENSP00000221975	ENSG00000105372	19	0.821	0.1158
hsa_retrop01907	ENST00000424736	1	113992337	113992883	+	ENSP00000447782	ENSG00000135486	12	0.847	3.369
hsa_retrom01512	ENST00000413412	1	114241506	114242132	-	ENSP00000436227	ENSG00000140988	16	0.701	0.8414
hsa_retrop01912	ENST00000427409	1	115002556	115002984	+	ENSP00000293842	ENSG00000161970	17	0.779	0.1524
hsa_retrop01946	ENST00000441051	1	116107222	116108050	+	ENSP00000355279	ENSG00000198791	8	0.852	0.1108
hsa_retrom01524	ENST00000452680	1	116399585	116400440	-	ENSP00000448633	ENSG00000135486	12	0.875	0.1174
hsa_retrom01548	ENST00000319092	1	117075700	117076714	-	ENSP00000369915	ENSG00000205531	11	0.909	0.131
hsa_retrom01556	ENST00000419696	1	117256458	117257457	-	ENSP00000380068	ENSG00000111640	12	0.824	0.1826
hsa_retrom01559	ENST00000456305	1	117317741	117318060	-	ENSP00000433321	ENSG00000167996	11	0.638	0.3119
hsa_retrop01952	ENST00000439856	1	117680842	117681228	+	ENSP00000318646	ENSG00000134419	16	0.811	0.2013
hsa_retrop01953	ENST00000455691	1	118092074	118092469	+	ENSP00000253794	ENSG00000131475	17	0.799	0.3589
hsa_retrom01577	ENST00000430995	1	118183437	118184290	-	ENSP00000442811	ENSG00000078668	8	0.586	2.4412
hsa_retrom01586	ENST00000436509	1	119156958	119158144	-	ENSP00000261303	ENSG00000100764	14	0.834	0.1328
hsa_retrom01587	ENST00000450122	1	119627756	119628577	-	ENSP00000339090	ENSG00000134597	X	0.867	0.0749
hsa_retrom01601	ENST00000443616	1	119669165	119669914	-	ENSP00000421457	ENSG00000145425	4	0.767	0.0872
hsa_retrom01610	ENST00000425480	1	119761931	119762719	-	ENSP00000403172	ENSG00000089009	12	0.849	0.1357
hsa_retrom01611	ENST00000449411	1	119977188	119977718	-	ENSP00000395680	ENSG00000111640	12	0.723	0.257
hsa_retrom01618	ENST00000444823	1	120004655	120005644	-	ENSP00000229239	ENSG00000111640	12	0.734	0.3794
hsa_retrom01624	ENST00000438477	1	120038462	120039415	-	ENSP00000380068	ENSG00000111640	12	0.771	0.2632
hsa_retrom01630	ENST00000433816	1	120076376	120077369	-	ENSP00000380070	ENSG00000111640	12	0.742	0.273
hsa_retrom01636	ENST00000447427	1	120101381	120102397	-	ENSP00000380068	ENSG00000111640	12	0.683	0.3189
hsa_retrom01642	ENST00000443168	1	120138793	120139802	-	ENSP00000229239	ENSG00000111640	12	0.704	0.3827
hsa_retrop02002	ENST00000475753	1	120395956	120396368	+	ENSP00000225655	ENSG00000108518	17	0.763	0.1536
hsa_retrop02004	ENST00000419150	1	120880941	120881242	+	ENSP00000346088	ENSG00000116251	1	0.853	0.1843
hsairetrop01903	ENST00000401004	1	120904675	120905087	+	ENSGGOP00000019458	ENSGGOG00000022928	5	0.942	NA
hsa_retrom01667	ENST00000419275	1	143767357	143767848	-	ENSP00000419425	ENSG00000196262	7	0.848	0.1136
hsa_retrom01682	ENST00000540273	1	144363680	144364171	-	ENSP00000419425	ENSG00000196262	7	0.86	0.1224
hsa_retrom01685	ENST00000476442	1	144612265	144612663	-	ENSP00000225655	ENSG00000108518	17	0.767	0.1922
hsa_retrom01698	ENST00000360993	1	145139090	145139569	-	ENSP00000338352	ENSG00000173598	12	1	0
hsa_retrop02584	ENST00000433399	1	146059943	146060341	+	ENSP00000225655	ENSG00000108518	17	0.752	0.1767
hsa_retrom01814	ENST00000497012	1	146392454	146392852	-	ENSP00000225655	ENSG00000108518	17	0.737	0.1761
hsairetrop02015	ENST00000435000	1	146522505	146523947	+	ENSPPYP00000016077	ENSPPYG00000014373	3	0.825	NA
hsa_retrom01821	ENST00000438469	1	146553890	146555127	-	ENSP00000260956	ENSG00000138385	2	0.885	0.0716
hsa_retrop02787	ENST00000471856	1	146649693	146651203	+	ENSP00000300289	ENSG00000167004	15	0.968	0.0318
hsa_retrom01837	ENST00000413611	1	146674921	146676513	-	ENSP00000286788	ENSG00000156261	21	0.927	0.0585
hsa_retrop02789	ENST00000446956	1	146695229	146695887	+	ENSP00000361076	ENSG00000148303	9	0.804	0.2715
hsa_retrop02797	ENST00000435270	1	146790829	146791543	+	ENSP00000440281	ENSG00000106853	9	0.867	0.1263
hsa_retrop02806	ENST00000458399	1	147313096	147314495	+	ENSP00000365266	ENSG00000204479	1	0.805	0.1206
hsa_retrop02818	ENST00000450970	1	147601780	147602178	+	ENSP00000225655	ENSG00000108518	17	0.752	0.1767
hsa_retrom01885	ENST00000539781	1	147954853	147955344	-	ENSP00000419425	ENSG00000196262	7	0.86	0.1224
hsa_retrop02827	ENST00000433527	1	148193338	148193853	+	ENSP00000285279	ENSG00000154978	7	0.994	0.0091
hsa_retrom01954	ENST00000544708	1	148201970	148202461	-	ENSP00000419425	ENSG00000196262	7	0.841	0.1205
hsa_retrop02835	ENST00000443612	1	148349256	148349654	+	ENSP00000225655	ENSG00000108518	17	0.767	0.1765
hsa_retrom02263	ENST00000476786	1	148574653	148575051	-	ENSP00000225655	ENSG00000108518	17	0.744	0.2173
hsa_retrop02880	ENST00000538306	1	148644086	148644577	+	ENSP00000419425	ENSG00000196262	7	0.841	0.1296
hsa_retrom02266	ENST00000457353	1	148736689	148737087	-	ENSP00000225655	ENSG00000108518	17	0.744	0.2045
hsa_retrop02925	ENST00000541527	1	148806090	148806581	+	ENSP00000419425	ENSG00000196262	7	0.841	0.1205
hsairetrop02134	ENST00000455938	1	149114777	149115120	+	ENSMUSP00000018437	ENSMUSG00000018293	11	0.701	NA
hsa_retrom02320	ENST00000454459	1	149340661	149341066	-	ENSP00000378277	ENSG00000078967	7	0.826	0.1516
hsairetrom01971	ENST00000392948	1	149400135	149400542	-	ENSGGOP00000019458	ENSGGOG00000022928	5	0.941	NA
hsa_retrom02368	ENST00000422106	1	149424595	149424896	-	ENSP00000346088	ENSG00000116251	1	0.853	0.1843
hsa_retrop02952	ENST00000369222	1	149553078	149553569	+	ENSP00000419425	ENSG00000196262	7	0.86	0.1224
hsa_retrom02398	ENST00000451620	1	149725852	149726258	-	ENSP00000378277	ENSG00000078967	7	0.826	0.1446
hsairetrom02005	ENST00000331491	1	149784829	149785236	-	ENSGGOP00000019458	ENSGGOG00000022928	5	0.971	NA
hsairetrom02014	ENST00000369158	1	149812322	149812729	-	ENSGGOP00000019458	ENSGGOG00000022928	5	0.971	NA
hsairetrop02210	ENST00000403683	1	149824217	149824624	+	ENSGGOP00000019458	ENSGGOG00000022928	5	0.971	NA
hsa_retrop03100	ENST00000426826	1	150025846	150026502	+	ENSP00000403172	ENSG00000089009	12	0.823	0.1331
hsa_retrop03112	ENST00000283110	1	150752815	150753123	+	ENSP00000345262	ENSG00000153130	4	0.818	0.1017
hsairetrom02076	ENST00000427962	1	150853708	150854046	-	ENSMMUP00000020417	ENSMMUG00000015563	13	0.817	NA
hsa_retrop03138	ENST00000452587	1	151529922	151530374	+	ENSP00000347271	ENSG00000124614	6	0.914	0.0908
hsa_retrom02623	ENST00000429230	1	152096917	152097589	-	ENSP00000370467	ENSG00000130021	X	0.791	0.206
hsa_retrop03142	ENST00000453847	1	152372052	152372225	+	ENSP00000275036	ENSG00000118418	6	0.897	0.047
hsa_retrop03158	ENST00000445179	1	153197556	153198342	+	ENSP00000339027	ENSG00000089157	12	0.822	0.275
hsa_retrop03166	ENST00000431295	1	153968108	153968433	+	ENSP00000378162	ENSG00000109475	4	0.8	0.0602
hsa_retrom02663	ENST00000437336	1	154350679	154351563	-	ENSP00000346067	ENSG00000168028	3	0.949	0.0442
hsa_retrom02664	ENST00000436275	1	154386846	154387632	-	ENSP00000215071	ENSG00000099341	19	0.878	0.212
hsairetrop02352	hsairetrop02352	1	155120961	155121326	+	ENSGGOP00000000955	ENSGGOG00000000971	1	0.911	NA
hsa_retrop03183	ENST00000413175	1	155403056	155404012	+	ENSP00000259915	ENSG00000204531	6	0.95	0.0398
hsa_retrop03186	ENST00000413921	1	155815172	155816005	+	ENSP00000219313	ENSG00000103035	16	0.774	0.2053
hsa_retrom02705	ENST00000379752	1	157029026	157030554	-	ENSP00000380336	ENSG00000122692	9	0.953	0.0358
hsa_retrop03206	ENST00000414328	1	157043235	157044277	+	ENSP00000447402	ENSG00000170421	12	0.917	0.1071
hsa_retrom02710	ENST00000412766	1	157694006	157694811	-	ENSP00000378484	ENSG00000213585	5	0.654	0.4667
hsa_retrom02715	ENST00000413990	1	158145640	158147520	-	ENSP00000237853	ENSG00000118985	5	0.935	0.042
hsa_retrom02716	ENST00000439139	1	158165466	158165920	-	ENSP00000347271	ENSG00000124614	6	0.849	0.1164
hsa_retrop03224	ENST00000397776	1	158424041	158425060	+	ENSP00000278903	ENSG00000149547	11	0.891	0.0753
hsairetrop02459	NA	1	158493462	158495625	+	ENSPTRP00000058433	ENSPTRG00000006736	14	0.873	NA
hsa_retrom02781	ENST00000446414	1	159050925	159051588	-	ENSP00000371469	ENSG00000113456	5	0.737	0.2643
hsa_retrop03290	ENST00000426330	1	159728960	159729376	+	ENSP00000253788	ENSG00000131469	17	0.743	0.3303
hsa_retrop03294	ENST00000415679	1	159990087	159990515	+	ENSP00000346015	ENSG00000166441	11	0.725	0.1824
hsa_retrom02822	ENST00000453374	1	160236132	160236980	-	ENSP00000346067	ENSG00000168028	3	0.943	0.0733
hsa_retrop03311	ENST00000439961	1	160287191	160287493	+	ENSP00000376077	ENSG00000116030	2	0.98	0.0099
hsa_retrop03315	ENST00000423837	1	160639941	160640615	+	ENSP00000318012	ENSG00000119335	9	0.788	0.1199
hsa_retrop03332	ENST00000447284	1	160817799	160818290	+	ENSP00000419425	ENSG00000196262	7	0.756	0.2294
hsa_retrop03336	ENST00000425270	1	160864770	160865866	+	ENSP00000385746	ENSG00000102172	X	0.978	0.0259
hsairetrop02602	ENST00000400984	1	161376263	161376874	+	ENSGGOP00000021640	ENSGGOG00000009371	16	0.951	NA
hsairetrom02428	hsairetrom02428	1	161381390	161381592	-	ENSPTRP00000053460	ENSPTRG00000005933	13	0.691	NA
hsa_retrop03388	ENST00000545155	1	161494449	161496377	+	ENSP00000432083	ENSG00000109971	11	0.782	25.4045
hsa_retrop03433	ENST00000445535	1	161576081	161578004	+	ENSP00000227378	ENSG00000109971	11	0.757	26.5978
hsa_retrom02854	ENST00000426558	1	161654642	161654961	-	ENSP00000264258	ENSG00000071082	2	0.907	0.1097
hsa_retrop03440	ENST00000457671	1	161860730	161861467	+	ENSP00000409487	ENSG00000131467	17	0.539	10.815
hsa_retrom02867	ENST00000434394	1	162949344	162949583	-	ENSP00000417656	ENSG00000131174	X	0.725	0.085
hsa_retrop03450	ENST00000435192	1	164312242	164313008	+	ENSP00000366410	ENSG00000173614	1	0.768	0.2311
hsa_retrop03465	ENST00000444896	1	164326040	164326536	+	ENSP00000410354	ENSG00000029993	X	0.964	0.0452
hsa_retrop03471	ENST00000443009	1	165550992	165551712	+	ENSP00000341885	ENSG00000140988	16	0.875	0.4187
hsa_retrop03476	ENST00000447545	1	165640493	165640990	+	ENSP00000435777	ENSG00000110700	11	0.816	0.1472
hsa_retrop03481	ENST00000437709	1	165645552	165646019	+	ENSP00000370574	ENSG00000122026	13	0.803	0.1529
hsa_retrop03487	ENST00000415894	1	165788590	165789024	+	ENSP00000293842	ENSG00000161970	17	0.89	0.0752
hsa_retrop03492	ENST00000422100	1	165991452	165992098	+	ENSP00000346050	ENSG00000145425	4	0.809	0.1478
hsa_retrop03497	ENST00000447259	1	166716616	166717623	+	ENSP00000412939	ENSG00000174444	15	0.887	0.0817
hsa_retrop03504	ENST00000443067	1	166765503	166766344	+	ENSP00000263097	ENSG00000064666	19	0.785	0.6594
hsa_retrop03512	ENST00000425573	1	166838016	166838444	+	ENSP00000405160	ENSG00000128951	15	0.687	0.3556
hsa_retrom02881	ENST00000450126	1	167131643	167132074	-	ENSP00000346046	ENSG00000182774	15	0.825	0.2253
hsa_retrop03528	ENST00000457236	1	167488981	167489820	+	ENSP00000242375	ENSG00000122787	7	0.755	0.1384
hsa_retrop03529	ENST00000422817	1	167560660	167561018	+	ENSP00000393241	ENSG00000231500	6	0.705	0.1977
hsa_retrom02883	ENST00000443090	1	168025142	168025660	-	ENSP00000319531	ENSG00000140905	16	1	0.0056
hsa_retrop03535	ENST00000450455	1	168179854	168180204	+	ENSP00000378160	ENSG00000109475	4	0.889	0.0822
hsa_retrop03536	ENST00000451806	1	168184681	168184887	+	ENSP00000339720	ENSG00000189043	7	0.706	0.1077
hsa_retrop03537	ENST00000421214	1	168338292	168338836	+	ENSP00000300087	ENSG00000166847	16	0.885	0.1542
hsa_retrom02887	ENST00000400977	1	168418908	168420449	-	ENSP00000358042	ENSG00000130348	6	0.839	0.1306
hsa_retrom02890	ENST00000426573	1	168547892	168548553	-	ENSP00000361076	ENSG00000148303	9	0.789	0.2844
hsa_retrop03545	ENST00000452524	1	168867374	168867676	+	ENSP00000376077	ENSG00000116030	2	0.822	0.2474
hsa_retrom02908	ENST00000406739	1	170338370	170339322	-	ENSP00000452260	ENSG00000092036	14	0.852	0.1194
hsa_retrom02918	ENST00000413899	1	171240207	171240727	-	ENSP00000343040	ENSG00000189403	13	0.897	0.0917
hsa_retrop03563	ENST00000491764	1	171361450	171361930	+	ENSP00000349687	ENSG00000196743	5	0.708	0.227
hsa_retrom02929	ENST00000442087	1	171639658	171640058	-	ENSP00000225655	ENSG00000108518	17	0.94	0.0777
hsa_retrom02932	ENST00000428881	1	171652572	171653578	-	ENSP00000412939	ENSG00000174444	15	0.884	0.1095
hsa_retrop03566	ENST00000458247	1	172717700	172718639	+	ENSP00000273158	ENSG00000144659	3	0.901	0.0357
hsa_retrom02937	ENST00000450663	1	173110242	173111406	-	ENSP00000245206	ENSG00000125166	16	0.845	NA
hsa_retrop03571	ENST00000433683	1	173320835	173321146	+	ENSP00000293842	ENSG00000161970	17	0.856	0.1123
hsa_retrom02947	ENST00000432815	1	173331533	173332822	-	ENSP00000443436	ENSG00000166037	11	0.797	0.148
hsa_retrom02953	ENST00000488676	1	174059281	174059610	-	ENSP00000429483	ENSG00000156482	8	0.773	0.3889
hsa_retrom02958	ENST00000423946	1	174336462	174337178	-	ENSP00000241502	ENSG00000122068	3	0.747	0.2763
hsa_retrom02964	ENST00000454883	1	174818854	174819306	-	ENSP00000358272	ENSG00000123545	6	0.821	0.13
hsa_retrom02969	ENST00000326105	1	175013765	175014848	-	ENSP00000360790	ENSG00000165689	9	0.931	0.0953
hsa_retrom02971	ENST00000434367	1	176200335	176200966	-	ENSP00000376811	ENSG00000167526	16	0.758	0.3943
hsa_retrom02985	ENST00000423476	1	176585407	176585919	-	ENSP00000359685	ENSG00000112245	6	0.854	0.0727
hsa_retrop03605	ENST00000455621	1	178380769	178381104	+	ENSP00000311028	ENSG00000164587	5	0.874	0.0757
hsa_retrom02990	ENST00000423212	1	178715821	178716923	-	ENSP00000372822	ENSG00000175354	18	0.927	0.0305
hsa_retrop03610	ENST00000416911	1	179224899	179225213	+	ENSP00000258424	ENSG00000135940	2	0.623	0.2202
hsa_retrom03011	ENST00000411857	1	179425917	179426447	-	ENSP00000447782	ENSG00000135486	12	0.872	0.0815
hsa_retrop03622	ENST00000447583	1	179937821	179938636	+	ENSP00000346067	ENSG00000168028	3	0.818	0.1854
hsa_retrop03631	ENST00000450197	1	180403935	180404389	+	ENSP00000390129	ENSG00000213585	5	0.852	0.0668
hsa_retrop03635	ENST00000445515	1	182305143	182305472	+	ENSP00000419449	ENSG00000173812	17	0.937	0.1112
hsa_retrom03035	ENST00000419500	1	182911241	182911537	-	ENSP00000370125	ENSG00000205581	21	0.95	0.0757
hsa_retrom03038	ENST00000453838	1	182928212	182929497	-	ENSP00000373487	ENSG00000111057	12	0.851	0.1395
hsa_retrop03646	ENST00000454879	1	183235738	183236406	+	ENSP00000421770	ENSG00000145425	4	0.677	0.6628
hsa_retrop03655	ENST00000245811	1	184535645	184536991	+	ENSP00000437279	ENSG00000188917	X	0.759	0.1523
hsa_retrom03042	ENST00000447665	1	185040697	185041087	-	ENSP00000433321	ENSG00000167996	11	0.595	0.2615
hsa_retrom03045	ENST00000392009	1	185195940	185196832	-	ENSP00000359345	ENSG00000122406	1	0.872	0.076
hsa_retrop03657	ENST00000413701	1	185249976	185250782	+	ENSP00000219313	ENSG00000103035	16	0.701	0.4011
hsa_retrom03052	hsa_retrom03052	1	185302038	185302403	-	ENSP00000268607	ENSG00000140941	16	0.65	0.4612
hsa_retrop03658	ENST00000424976	1	187532201	187533260	+	ENSP00000391755	ENSG00000160752	1	0.822	0.1128
hsa_retrom03068	hsa_retrom03068	1	187683388	187684456	-	ENSP00000400787	ENSG00000196290	2	0.648	0.2644
hsa_retrop03668	ENST00000417027	1	188663536	188664239	+	ENSP00000346050	ENSG00000145425	4	0.696	0.2883
hsa_retrom03097	ENST00000433910	1	189101484	189102376	-	ENSP00000380068	ENSG00000111640	12	0.682	0.4046
hsa_retrop03670	ENST00000445040	1	190766703	190767074	+	ENSP00000319531	ENSG00000140905	16	0.677	0.5814
hsa_retrom03103	ENST00000411735	1	191115552	191116091	-	ENSP00000447260	ENSG00000135486	12	0.845	0.1273
hsa_retrop03677	ENST00000497083	1	192685313	192685780	+	ENSP00000383981	ENSG00000143947	2	0.955	0.0242
hsa_retrop03681	ENST00000429211	1	192769828	192770280	+	ENSP00000353850	ENSG00000119185	2	0.77	0.2062
hsa_retrop03691	ENST00000421195	1	194158097	194159426	+	ENSP00000330054	ENSG00000156508	6	0.856	0.1019
hsairetrop02978	ENST00000446021	1	194687927	194688238	+	ENSMUSP00000119555	ENSMUSG00000062580	1	0.809	NA
hsa_retrop03697	ENST00000417716	1	197191400	197192382	+	ENSP00000440459	ENSG00000182220	X	0.88	0.122
hsa_retrop03711	ENST00000447479	1	197704766	197705095	+	ENSP00000419179	ENSG00000114391	3	0.855	0.136
hsa_retrom03142	ENST00000369171	1	197715885	197716581	-	ENSP00000358170	ENSG00000165669	10	0.88	0.1065
hsa_retrom03144	ENST00000455475	1	198648697	198649162	-	ENSP00000261313	ENSG00000089220	12	0.803	0.2339
hsa_retrop03716	ENST00000436136	1	198918279	198918931	+	ENSP00000341885	ENSG00000140988	16	0.881	0.2665
hsa_retrop03719	ENST00000441715	1	199341073	199341414	+	ENSP00000389103	ENSG00000198242	17	0.719	0.4205
hsa_retrop03726	ENST00000430498	1	199356269	199357600	+	ENSP00000330054	ENSG00000156508	6	0.782	0.2287
hsa_retrop03728	ENST00000448132	1	199721606	199722021	+	ENSP00000254878	ENSG00000132541	8	0.75	0.2885
hsa_retrop03731	ENST00000439946	1	199846106	199846336	+	ENSP00000339720	ENSG00000189043	7	0.74	0.153
hsa_retrop03738	ENST00000439056	1	200182779	200183444	+	ENSP00000384396	ENSG00000147382	X	0.896	0.09
hsa_retrop03749	ENST00000425737	1	200298358	200298746	+	ENSP00000436431	ENSG00000172757	11	0.687	0.4446
hsa_retrop03754	ENST00000432390	1	200832936	200833271	+	ENSP00000378160	ENSG00000109475	4	0.868	0.1005
hsairetrop03072	ENST00000413162	1	201398185	201398488	+	ENSMMUP00000017005	ENSMMUG00000012956	X	0.806	NA
hsa_retrop03757	ENST00000482594	1	201489184	201489636	+	ENSP00000347271	ENSG00000124614	6	0.921	0.0539
hsa_retrop03761	ENST00000417053	1	202407775	202408627	+	ENSP00000222308	ENSG00000105701	19	0.859	0.355
hsa_retrop03764	ENST00000444461	1	202765158	202766222	+	ENSP00000366299	ENSG00000013306	17	0.681	0.3998
hsa_retrop03787	ENST00000456105	1	202842495	202843451	+	ENSP00000349960	ENSG00000075624	7	0.665	1.0727
hsa_retrop03792	ENST00000430583	1	202880940	202881499	+	ENSP00000447260	ENSG00000135486	12	0.893	0.1065
hsa_retrop03796	ENST00000427395	1	202969189	202969467	+	ENSP00000427788	ENSG00000008988	8	0.66	0.5271
hsa_retrom03179	ENST00000451818	1	203626098	203626888	-	ENSP00000296802	ENSG00000164346	5	0.868	0.0946
hsa_retrom03180	ENST00000432760	1	203774749	203775383	-	ENSP00000223500	ENSG00000086065	9	0.815	0.1947
hsa_retrom03188	ENST00000420409	1	203842333	203843121	-	ENSP00000448048	ENSG00000170421	12	0.758	0.389
hsairetrom02919	ENST00000540496	1	203872857	203873048	-	ENSMODP00000015398	ENSMODG00000012295	4	0.906	NA
hsa_retrop03808	ENST00000440142	1	204152200	204152640	+	ENSP00000447057	ENSG00000151131	12	0.681	0.3137
hsa_retrom03198	ENST00000403842	1	204315907	204316386	-	ENSP00000351021	ENSG00000122026	13	0.963	0.0291
hsairetrop03155	ENST00000428506	1	205103774	205104064	+	ENSPPYP00000015441	ENSPPYG00000013798	3	0.711	NA
hsairetrop03162	ENST00000448403	1	205171319	205171805	+	ENSMMUP00000024789	ENSMMUG00000018837	18	0.877	NA
hsa_retrop03820	ENST00000432323	1	205320375	205320596	+	ENSP00000272348	ENSG00000143977	2	0.986	0.0362
hsairetrop03182	ENST00000430042	1	206180126	206180413	+	ENSGALP00000001013	ENSGALG00000000719	21	0.854	NA
hsa_retrop03830	ENST00000428027	1	206702323	206702979	+	ENSP00000361076	ENSG00000148303	9	0.932	0.1181
hsa_retrom03219	ENST00000451736	1	206869206	206869614	-	ENSP00000311028	ENSG00000164587	5	0.886	0.1067
hsa_retrop03842	ENST00000446057	1	207080964	207081313	+	ENSP00000439545	ENSG00000142541	19	0.812	0.227
hsa_retrop03847	ENST00000429208	1	209405543	209406714	+	ENSP00000364519	ENSG00000198176	13	0.858	0.1447
hsa_retrom03238	ENST00000433580	1	209441146	209441598	-	ENSP00000340315	ENSG00000135390	12	0.894	0.1695
hsa_retrom03244	ENST00000442505	1	210440013	210440584	-	ENSP00000438660	ENSG00000100380	22	0.927	0.1014
hsa_retrop03851	ENST00000451327	1	210477030	210477882	+	ENSP00000313350	ENSG00000171865	2	0.745	0.2395
hsa_retrom03248	ENST00000455509	1	211032519	211034954	-	ENSP00000369042	ENSG00000205339	11	0.894	0.0747
hsa_retrop03852	ENST00000427600	1	211346879	211347190	+	ENSP00000435096	ENSG00000118181	11	0.913	0.0535
hsa_retrop03855	ENST00000431591	1	211380581	211381237	+	ENSP00000302114	ENSG00000169230	5	0.959	0.0809
hsa_retrop03859	ENST00000457786	1	211615616	211616145	+	ENSP00000228825	ENSG00000111229	12	0.899	0.1059
hsa_retrom03254	ENST00000438304	1	211833534	211834618	-	ENSP00000349078	ENSG00000160752	1	0.829	0.1549
hsa_retrom03259	ENST00000327274	1	212224869	212225348	-	ENSP00000351021	ENSG00000122026	13	0.994	0.0125
hsa_retrom03263	ENST00000416139	1	212482393	212482770	-	ENSP00000389103	ENSG00000198242	17	0.96	0.0888
hsa_retrop03865	ENST00000456479	1	212820745	212821097	+	ENSP00000365926	ENSG00000135002	9	0.78	0.2782
hsa_retrop03866	ENST00000449334	1	212997369	212997852	+	ENSP00000196551	ENSG00000083845	19	0.804	0.1407
hsa_retrom03265	ENST00000422630	1	213028556	213028708	-	ENSP00000397872	ENSG00000233927	19	0.704	0.4211
hsa_retrom03275	ENST00000484151	1	213602030	213602377	-	ENSP00000386271	ENSG00000071082	2	0.66	0.3583
hsa_retrom03278	ENST00000432577	1	214656153	214656730	-	ENSP00000325369	ENSG00000177879	5	0.948	0.049
hsa_retrop03870	ENST00000425245	1	214705756	214706811	+	ENSP00000373487	ENSG00000111057	12	0.825	0.1932
hsa_retrom03301	ENST00000436983	1	214786304	214786740	-	ENSP00000360739	ENSG00000244687	20	0.782	0.2336
hsa_retrop03874	ENST00000328713	1	215044077	215045059	+	ENSP00000380070	ENSG00000111640	12	0.741	0.4495
hsa_retrop03882	ENST00000416715	1	215549848	215550720	+	ENSP00000445901	ENSG00000165637	10	0.531	1.9908
hsa_retrom03307	ENST00000424737	1	219373254	219374040	-	ENSP00000438004	ENSG00000166532	12	0.721	0.2782
hsa_retrom03315	ENST00000431766	1	219783041	219785404	-	ENSP00000356183	ENSG00000058673	1	0.933	0.0188
hsa_retrom03320	ENST00000419498	1	220317303	220317692	-	ENSP00000318646	ENSG00000134419	16	0.923	0.102
hsa_retrop03902	ENST00000404582	1	220426912	220427880	+	ENSP00000408880	ENSG00000185787	15	0.991	0.0142
hsairetrom03121	ENST00000451805	1	220440049	220441255	-	ENSPTRP00000023475	ENSPTRG00000013646	20	0.916	NA
hsa_retrom03332	hsa_retrom03332	1	220487327	220488897	-	ENSP00000384941	ENSG00000196419	22	0.807	0.1573
hsa_retrom03343	ENST00000448115	1	220490150	220490941	-	ENSP00000449328	ENSG00000089157	12	0.859	0.1401
hsa_retrop03913	ENST00000457142	1	220641296	220641800	+	ENSP00000348206	ENSG00000101166	20	0.841	0.1371
hsairetrop03348	NA	1	220799191	220799877	+	ENSMUSP00000101149	ENSMUSG00000019777	10	0.723	NA
hsairetrom03152	ENST00000419031	1	221723207	221723990	-	ENSMMUP00000018633	ENSMMUG00000014187	11	0.615	NA
hsa_retrom03354	ENST00000413568	1	222814856	222815200	-	ENSP00000334188	ENSG00000123349	12	0.835	0.1824
hsa_retrom03360	ENST00000420249	1	223831814	223832085	-	ENSP00000400591	ENSG00000182004	1	0.783	0.1142
hsa_retrom03366	ENST00000420550	1	224044284	224045089	-	ENSP00000300408	ENSG00000167085	17	0.897	0.1445
hsa_retrom03395	ENST00000436287	1	224051431	224052553	-	ENSP00000349960	ENSG00000075624	7	0.867	0.2852
hsa_retrop03942	ENST00000441469	1	224485940	224486299	+	ENSP00000370569	ENSG00000122026	13	0.75	0.1523
hsa_retrop03952	ENST00000429105	1	224762136	224763088	+	ENSP00000285930	ENSG00000085662	7	0.877	0.2036
hsa_retrom03411	ENST00000429867	1	226376581	226376922	-	ENSP00000378163	ENSG00000109475	4	0.781	0.1149
hsa_retrop03972	ENST00000411586	1	226626262	226627030	+	ENSP00000346050	ENSG00000145425	4	0.872	0.1359
hsa_retrop03980	ENST00000445817	1	227618291	227618615	+	ENSP00000393241	ENSG00000231500	6	0.773	0.1587
hsa_retrop03984	ENST00000418784	1	227621762	227622049	+	ENSP00000436712	ENSG00000134717	1	0.638	20.0574
hsa_retrom03449	ENST00000414727	1	228302699	228303157	-	ENSP00000300030	ENSG00000166797	15	0.825	0.1039
hsa_retrom03452	ENST00000413855	1	228322529	228322693	-	ENSP00000397872	ENSG00000233927	19	0.745	0.4145
hsairetrom03253	ENST00000366696	1	228612619	228613026	-	ENSGGOP00000019458	ENSGGOG00000022928	5	0.934	NA
hsa_retrom03484	ENST00000450202	1	228636865	228637231	-	ENSP00000389103	ENSG00000198242	17	0.811	0.1594
hsa_retrop04050	ENST00000327449	1	228786025	228787123	+	ENSP00000358596	ENSG00000138166	10	0.719	0.3615
hsa_retrop04054	ENST00000413500	1	228823161	228823571	+	ENSP00000433321	ENSG00000167996	11	0.956	0.0297
hsairetrop03487	ENST00000366691	1	228879029	228879484	+	ENSGGOP00000025053	ENSGGOG00000024439	1	0.577	NA
hsa_retrop04060	ENST00000438679	1	229177845	229178336	+	ENSP00000365159	ENSG00000135070	9	0.874	0.1157
hsairetrop03499	ENST00000425149	1	229706275	229706547	+	ENSGGOP00000000955	ENSGGOG00000000971	1	0.879	NA
hsa_retrom03557	ENST00000434580	1	229824747	229825596	-	ENSP00000298569	ENSG00000122203	5	0.84	0.1296
hsa_retrom03565	ENST00000452520	1	229841090	229841579	-	ENSP00000382417	ENSG00000189403	13	0.827	0.146
hsairetrom03310	NA	1	230747755	230748158	-	ENSMUSP00000125977	ENSMUSG00000025290	14	0.799	NA
hsa_retrop04071	ENST00000413346	1	231157357	231157926	+	ENSP00000426503	ENSG00000063978	4	0.937	0.0917
hsa_retrom03594	ENST00000435008	1	231253583	231254066	-	ENSP00000419425	ENSG00000196262	7	0.795	0.1527
hsa_retrom03604	ENST00000443360	1	233424612	233425193	-	ENSP00000385018	ENSG00000171863	2	0.918	0.0473
hsa_retrop04082	ENST00000412915	1	234420789	234421288	+	ENSP00000425250	ENSG00000163682	4	0.663	0.3125
hsa_retrom03606	ENST00000422958	1	234492453	234492887	-	ENSP00000233609	ENSG00000115268	19	0.924	0.1475
hsa_retrop04094	ENST00000434479	1	235596300	235596549	+	ENSP00000388332	ENSG00000171858	20	0.662	0.2478
hsa_retrop04099	ENST00000424229	1	235778692	235779696	+	ENSP00000370635	ENSG00000104635	8	0.716	0.3083
hsa_retrop04118	ENST00000437325	1	235901231	235902286	+	ENSP00000445175	ENSG00000134333	11	0.875	0.1171
hsa_retrop04128	ENST00000446607	1	236273361	236275669	+	ENSP00000216254	ENSG00000100412	22	0.858	0.1858
hsa_retrop04145	ENST00000366587	1	236646465	236647766	+	ENSP00000234590	ENSG00000074800	1	0.887	0.1129
hsa_retrop04151	ENST00000414293	1	236982936	236983817	+	ENSP00000346067	ENSG00000168028	3	0.888	0.1458
hsa_retrop04154	ENST00000450819	1	237144721	237145005	+	ENSP00000259469	ENSG00000136942	9	0.895	0.0186
hsairetrop03612	ENST00000450208	1	238090265	238090828	+	ENSMODP00000001670	ENSMODG00000008918	2	0.835	NA
hsa_retrop04163	ENST00000424695	1	238654885	238655944	+	ENSP00000373489	ENSG00000111057	12	0.85	0.1606
hsa_retrop04172	ENST00000400943	1	240136087	240137544	+	ENSP00000322706	ENSG00000112972	5	0.784	0.1604
hsa_retrom03619	ENST00000451892	1	240305970	240308674	-	ENSP00000310129	ENSG00000175166	3	0.914	0.0839
hsa_retrop04191	ENST00000433842	1	240333470	240334591	+	ENSP00000296412	ENSG00000197894	4	0.896	0.081
hsa_retrom03624	ENST00000420757	1	240799894	240800340	-	ENSP00000270625	ENSG00000142534	19	0.812	0.13
hsairetrop03653	ENST00000442611	1	240817562	240817924	+	ENSMUSP00000010348	ENSMUSG00000079677	9	0.73	NA
hsa_retrom03627	ENST00000400940	1	240986317	240986733	-	ENSP00000365926	ENSG00000135002	9	0.806	0.1895
hsa_retrop04194	ENST00000458678	1	241082953	241083531	+	ENSP00000447260	ENSG00000135486	12	0.876	0.1103
hsa_retrom03629	ENST00000366553	1	241797101	241799068	-	ENSP00000350386	ENSG00000188419	X	0.72	0.7655
hsa_retrop04202	ENST00000414898	1	241995237	241996086	+	ENSP00000202773	ENSG00000089009	12	0.871	0.1058
hsa_retrop04204	ENST00000356052	1	242121078	242122355	+	ENSP00000355231	ENSG00000126581	17	0.561	1.2483
hsa_retrop04222	ENST00000451536	1	242156569	242156982	+	ENSP00000433910	ENSG00000172757	11	0.813	0.3409
hsa_retrop04249	ENST00000427498	1	242528583	242529113	+	ENSP00000363018	ENSG00000198755	6	0.808	0.3795
hsa_retrop04252	ENST00000400938	1	242935929	242936398	+	ENSP00000260443	ENSG00000137876	15	0.834	0.1304
hsa_retrom03636	ENST00000451185	1	243430960	243431421	-	ENSP00000344393	ENSG00000119616	14	0.883	0.0501
hsa_retrom03639	ENST00000424004	1	243788010	243788326	-	ENSP00000357429	ENSG00000164434	6	0.792	0.245
hsa_retrom03649	ENST00000416174	1	244857762	244858022	-	ENSP00000274242	ENSG00000145592	5	0.875	0.0757
hsa_retrop04265	ENST00000439523	1	247206093	247207326	+	ENSP00000350491	ENSG00000198056	12	0.833	0.0987
hsa_retrop04269	ENST00000452704	1	247338579	247338848	+	ENSP00000405965	ENSG00000188612	17	0.617	0.4315
hsa_retrom03676	ENST00000400933	1	247347118	247348736	-	ENSP00000379877	ENSG00000139197	12	0.831	0.1215
hsa_retrop04299	ENST00000397642	1	247393248	247395112	+	ENSP00000227378	ENSG00000109971	11	0.887	0.1323
hsa_retrop04363	ENST00000412419	1	247990790	247991423	+	ENSP00000356894	ENSG00000132196	1	0.768	0.132
hsa_retrom03764	ENST00000427566	1	248099358	248100329	-	ENSP00000394463	ENSG00000176444	1	0.52	10.7954
hsa_retrom03943	ENST00000427780	1	249065846	249067987	-	ENSP00000389630	ENSG00000156162	8	0.811	0.1525
hsa_retrop04784	ENST00000430973	1	249230903	249231265	+	ENSP00000389103	ENSG00000198242	17	0.857	0.2037
hsa_retrom03990	ENST00000451325	10	5346394	5346828	-	ENSP00000293842	ENSG00000161970	17	0.786	0.2735
hsa_retrom04009	ENST00000380332	10	5540964	5541401	-	ENSP00000349467	ENSG00000198668	14	0.514	21.7693
hsa_retrop04800	ENST00000442008	10	5566941	5567495	+	ENSP00000291295	ENSG00000160014	19	0.846	8.7694
hsa_retrop04809	hsa_retrop04809	10	5817966	5818793	+	ENSP00000277746	ENSG00000148572	10	0.815	0.1396
hsa_retrom04012	ENST00000380094	10	5904165	5904557	-	ENSP00000354739	ENSG00000197958	9	0.744	0.2421
hsa_retrom04018	ENST00000397237	10	6113477	6113828	-	ENSP00000380158	ENSG00000144713	3	0.617	0.2625
hsa_retrop04814	ENST00000451976	10	8203223	8203887	+	ENSP00000257181	ENSG00000134748	1	0.869	0.0667
hsa_retrom04054	ENST00000451609	10	8555648	8557142	-	ENSP00000449404	ENSG00000170421	12	0.86	0.2675
hsa_retrop04818	ENST00000425516	10	8661957	8662573	+	ENSP00000262570	ENSG00000106554	7	0.825	0.1185
hsa_retrom04061	ENST00000448495	10	10818182	10818624	-	ENSP00000376160	ENSG00000128699	2	0.678	0.3203
hsa_retrom04065	ENST00000441148	10	13099928	13100676	-	ENSP00000359345	ENSG00000122406	1	0.868	0.1202
hsa_retrom04080	hsa_retrom04080	10	13201474	13201852	-	ENSP00000404375	ENSG00000241343	X	0.783	0.0748
hsa_retrom04086	ENST00000429930	10	13350148	13350447	-	ENSP00000416245	ENSG00000176731	8	0.75	0.1317
hsa_retrom04090	ENST00000445338	10	13633460	13634186	-	ENSP00000202773	ENSG00000089009	12	0.833	0.1366
hsa_retrop04835	ENST00000475013	10	13912797	13913144	+	ENSP00000219169	ENSG00000102898	16	0.621	0.3403
hsa_retrom04095	ENST00000456871	10	14765170	14766018	-	ENSP00000346067	ENSG00000168028	3	0.845	0.1751
hsa_retrom04125	ENST00000415473	10	15196801	15197319	-	ENSP00000394670	ENSG00000196262	7	0.785	0.1584
hsa_retrom04126	ENST00000512032	10	15213035	15213277	-	ENSP00000339720	ENSG00000189043	7	0.765	0.068
hsa_retrop04845	ENST00000413342	10	19026797	19027562	+	ENSP00000316320	ENSG00000156709	X	0.767	0.1863
hsa_retrop04854	ENST00000457220	10	20639163	20640029	+	ENSP00000357880	ENSG00000123505	6	0.741	0.1311
hsairetrom03877	ENST00000453465	10	21914106	21915215	-	ENSOANP00000006266	ENSOANG00000003961	Contig7223	0.85	NA
hsa_retrop04867	ENST00000419532	10	22555959	22556271	+	ENSP00000386681	ENSG00000071082	2	0.771	0.2345
hsa_retrop04903	ENST00000415292	10	23425850	23426578	+	ENSP00000379287	ENSG00000164924	8	0.979	0.0697
hsairetrop04130	ENST00000422120	10	23547140	23547474	+	ENSGALP00000000226	ENSGALG00000000171	22	0.653	NA
hsa_retrop04915	ENST00000422734	10	24446764	24447674	+	ENSP00000295119	ENSG00000163002	2	0.84	0.0969
hsairetrom03903	ENST00000445714	10	27638648	27639219	-	ENSMUSP00000028995	ENSMUSG00000027495	2	0.72	NA
hsa_retrom04149	ENST00000435701	10	28629162	28629871	-	ENSP00000438249	ENSG00000223547	19	0.519	0.5161
hsa_retrop04923	ENST00000426103	10	28725185	28726007	+	ENSP00000346067	ENSG00000168028	3	0.841	0.1353
hsa_retrop04927	ENST00000456243	10	28947922	28948359	+	ENSP00000272424	ENSG00000144034	2	0.774	0.2188
hsa_retrom04154	ENST00000395291	10	29187934	29188413	-	ENSP00000370569	ENSG00000122026	13	0.963	0.0213
hsa_retrop04930	ENST00000497342	10	29986864	29987082	+	ENSP00000311083	ENSG00000173207	1	0.986	0.0115
hsa_retrom04160	ENST00000441292	10	30179973	30180296	-	ENSP00000265304	ENSG00000106028	7	0.787	0.3717
hsa_retrop04931	ENST00000398317	10	30669103	30669579	+	ENSP00000386449	ENSG00000155438	2	0.86	0.2034
hsa_retrop04942	ENST00000450921	10	32202096	32202462	+	ENSP00000369904	ENSG00000189403	13	0.713	0.239
hsa_retrom04178	ENST00000446897	10	32391450	32392221	-	ENSP00000362744	ENSG00000198034	X	0.876	0.0843
hsa_retrom04197	ENST00000405422	10	32477251	32477745	-	ENSP00000419425	ENSG00000196262	7	0.958	0.0165
hsairetrom03971	NA	10	32520786	32521172	-	ENSMMUP00000007295	ENSMMUG00000030562	9	0.881	NA
hsa_retrom04208	ENST00000426049	10	32800246	32800722	-	ENSP00000384304	ENSG00000197223	2	0.947	0.0515
hsairetrop04200	ENST00000432033	10	33233462	33233926	+	ENSOANP00000002407	ENSOANG00000001505	X5	0.717	NA
hsa_retrom04212	ENST00000468834	10	33346588	33347253	-	ENSP00000361076	ENSG00000148303	9	0.905	0.0986
hsa_retrom04214	ENST00000411602	10	34952784	34953029	-	ENSP00000274242	ENSG00000145592	5	0.51	0.6028
hsa_retrom04215	ENST00000399739	10	34964566	34964969	-	ENSP00000230050	ENSG00000112306	6	0.772	0.3028
hsa_retrop04949	ENST00000445923	10	35164138	35164332	+	ENSP00000401115	ENSG00000008324	3	0.923	0.2201
hsa_retrop04951	ENST00000438388	10	35447234	35447565	+	ENSP00000363162	ENSG00000136888	9	0.723	0.3301
hsa_retrop04960	ENST00000425095	10	35986273	35986964	+	ENSP00000339795	ENSG00000147604	8	0.866	0.0825
hsa_retrom04218	ENST00000440465	10	36811747	36813165	-	ENSP00000222553	ENSG00000105835	7	0.992	0.0226
hsa_retrop04965	ENST00000431356	10	37283951	37284479	+	ENSP00000440010	ENSG00000170540	16	0.818	0.0603
hsa_retrop04973	ENST00000457388	10	37626363	37627799	+	ENSP00000296595	ENSG00000164180	5	0.898	0.0646
hsa_retrom04232	ENST00000414066	10	38107628	38109695	-	ENSP00000275780	ENSG00000146872	17	0.889	0.0696
hsa_retrom04237	ENST00000444174	10	38380650	38380979	-	ENSP00000431427	ENSG00000137726	11	0.768	0.2626
hsa_retrop05002	ENST00000448440	10	38989707	38990929	+	ENSP00000263238	ENSG00000115091	2	0.708	8.4739
hsa_retrop05060	hsa_retrop05060	10	43050888	43051217	+	ENSP00000431446	ENSG00000137726	11	0.8	0.2299
hsa_retrom04289	ENST00000337970	10	43882088	43883332	-	ENSP00000426275	ENSG00000169045	5	0.773	1.1478
hsa_retrom04302	ENST00000417455	10	44100294	44101676	-	ENSP00000361878	ENSG00000131236	1	0.895	0.0933
hsa_retrop05070	ENST00000436649	10	44126395	44126871	+	ENSP00000370569	ENSG00000122026	13	0.814	0.218
hsa_retrop05071	ENST00000451503	10	44227782	44228054	+	ENSP00000309565	ENSG00000173660	1	0.857	0.3051
hsa_retrom04390	ENST00000423264	10	44285206	44285754	-	ENSP00000447782	ENSG00000135486	12	0.842	3.5527
hsairetrom04148	ENST00000392269	10	44910093	44910601	-	ENSGGOP00000027610	ENSGGOG00000022799	4	0.86	NA
hsa_retrop05074	ENST00000424793	10	45302339	45303421	+	ENSP00000372513	ENSG00000144895	3	0.724	0.3774
hsa_retrop05076	hsa_retrop05076	10	45551103	45551714	+	ENSP00000452398	ENSG00000258873	19	0.853	0.1539
hsa_retrom04398	ENST00000455650	10	45568592	45569004	-	ENSP00000221975	ENSG00000105372	19	0.864	0.1251
hsa_retrom04399	ENST00000433115	10	45646888	45647324	-	ENSP00000412534	ENSG00000100124	22	0.592	0.5041
hsairetrop04411	ENST00000399571	10	46773447	46774368	+	ENSMMUP00000030450	ENSMMUG00000023132	14	0.863	NA
hsa_retrop05104	ENST00000448647	10	46914151	46914702	+	ENSP00000262187	ENSG00000106615	7	0.989	0.0253
hsairetrop04437	ENST00000399538	10	47254247	47255168	+	ENSMMUP00000030450	ENSMMUG00000023132	14	0.859	NA
hsa_retrop05113	ENST00000450289	10	47396223	47396744	+	ENSP00000262187	ENSG00000106615	7	0.977	0.0464
hsa_retrop05116	ENST00000399501	10	47594379	47595303	+	ENSP00000217426	ENSG00000101444	20	0.764	0.3195
hsairetrom04210	ENST00000399452	10	48174185	48175106	-	ENSMMUP00000030450	ENSMMUG00000023132	14	0.853	NA
hsairetrop04485	ENST00000448376	10	48963182	48964103	+	ENSMMUP00000030450	ENSMMUG00000023132	14	0.863	NA
hsa_retrom04505	ENST00000434320	10	49953590	49954144	-	ENSP00000375730	ENSG00000142541	19	0.729	0.436
hsa_retrom04563	ENST00000439573	10	51532105	51532491	-	ENSP00000389103	ENSG00000198242	17	0.907	0.1592
hsa_retrop05239	ENST00000435916	10	52024738	52026572	+	ENSP00000386397	ENSG00000077380	2	0.979	0.0162
hsa_retrom04574	ENST00000443374	10	52389287	52391008	-	ENSP00000315182	ENSG00000144736	3	0.879	0.0928
hsa_retrom04578	ENST00000417131	10	52722752	52723187	-	ENSP00000291458	ENSG00000160124	3	0.834	0.1559
hsa_retrop05245	ENST00000412878	10	53079586	53080417	+	ENSP00000339521	ENSG00000148484	10	0.729	0.3093
hsa_retrom04584	ENST00000331173	10	53457792	53459309	-	ENSP00000362063	ENSG00000101811	X	0.72	0.7529
hsa_retrom04590	ENST00000450301	10	57427104	57428110	-	ENSP00000380068	ENSG00000111640	12	0.783	0.2965
hsa_retrom04596	ENST00000312966	10	59972349	59972745	-	ENSP00000368350	ENSG00000133112	13	0.768	0.2406
hsa_retrom04598	ENST00000429404	10	60896385	60897942	-	ENSP00000433623	ENSG00000175104	11	0.91	0.0488
hsa_retrop05274	ENST00000414123	10	64981915	64982805	+	ENSP00000276692	ENSG00000147687	8	0.943	0.0369
hsa_retrop05278	ENST00000439942	10	65187057	65187581	+	ENSP00000302114	ENSG00000169230	5	0.857	0.121
hsa_retrom04614	ENST00000452821	10	65662207	65662921	-	ENSP00000361076	ENSG00000148303	9	0.929	0.0563
hsairetrom04420	NA	10	65929801	65930560	-	ENSOANP00000006992	ENSOANG00000004415	15	0.676	NA
hsairetrom04427	ENST00000432217	10	66380302	66380619	-	ENSPPYP00000010281	ENSPPYG00000009151	18	0.574	NA
hsa_retrop05304	ENST00000404883	10	66585317	66586338	+	ENSP00000346032	ENSG00000182718	15	0.854	0.1216
hsa_retrom04636	ENST00000436904	10	66929195	66929642	-	ENSP00000446714	ENSG00000092841	12	0.821	0.1908
hsa_retrop05317	ENST00000422016	10	69093957	69094643	+	ENSP00000361076	ENSG00000148303	9	0.693	0.3672
hsa_retrop05332	ENST00000425765	10	69510042	69510987	+	ENSP00000352584	ENSG00000198074	7	0.915	0.0619
hsa_retrop05338	ENST00000454107	10	69553541	69554005	+	ENSP00000346027	ENSG00000122026	13	0.846	0.0895
hsa_retrop05341	ENST00000455312	10	69593521	69593799	+	ENSP00000372005	ENSG00000205981	3	0.839	0.1379
hsa_retrop05343	ENST00000482081	10	69634178	69634648	+	ENSP00000354739	ENSG00000197958	9	0.949	0.0789
hsa_retrom04647	ENST00000435889	10	69720519	69721173	-	ENSP00000346050	ENSG00000145425	4	0.76	0.2305
hsa_retrop05345	ENST00000443208	10	70020354	70021256	+	ENSP00000355124	ENSG00000171345	17	0.638	0.4399
hsa_retrop05351	ENST00000415623	10	70184317	70184751	+	ENSP00000430147	ENSG00000037241	5	0.869	0.1077
hsa_retrop05357	ENST00000414397	10	70259289	70259722	+	ENSP00000293842	ENSG00000161970	17	0.822	0.1565
hsa_retrom04658	hsa_retrom04658	10	70304144	70304590	-	ENSP00000368858	ENSG00000137210	6	0.956	0.0282
hsa_retrop05358	ENST00000366529	10	70392128	70392481	+	ENSP00000406327	ENSG00000203667	1	0.966	0.0216
hsa_retrop05370	ENST00000419176	10	70434133	70434861	+	ENSP00000346050	ENSG00000145425	4	0.824	0.1821
hsa_retrop05376	ENST00000399158	10	70750979	70751424	+	ENSP00000237380	ENSG00000118579	4	0.762	0.2939
hsa_retrop05402	ENST00000411655	10	70782513	70783431	+	ENSP00000331514	ENSG00000184009	17	0.791	1.8096
hsa_retrom04665	ENST00000438591	10	70921317	70921662	-	ENSP00000230050	ENSG00000112306	6	0.793	0.121
hsa_retrom04666	ENST00000435088	10	71060188	71060573	-	ENSP00000318646	ENSG00000134419	16	0.869	0.1341
hsa_retrom04671	ENST00000444398	10	71192728	71193127	-	ENSP00000377033	ENSG00000159199	17	0.858	0.1196
hsa_retrop05406	ENST00000438138	10	71538718	71539594	+	ENSP00000359345	ENSG00000122406	1	0.837	0.1559
hsa_retrop05415	ENST00000428512	10	71923388	71923879	+	ENSP00000291295	ENSG00000160014	19	0.919	8.0739
hsa_retrop05436	ENST00000430943	10	72149179	72150351	+	ENSP00000357964	ENSG00000183137	6	0.969	0.0447
hsa_retrop05458	ENST00000416278	10	73949705	73950331	+	ENSP00000390193	ENSG00000174748	3	0.847	0.1304
hsa_retrom04684	ENST00000428039	10	74677403	74678292	-	ENSP00000428755	ENSG00000181163	5	0.899	0.0704
hsa_retrop05469	ENST00000455776	10	74960121	74960983	+	ENSP00000348925	ENSG00000156976	3	0.834	0.1623
hsa_retrom04696	ENST00000440913	10	75182020	75182454	-	ENSP00000293842	ENSG00000161970	17	0.91	0.0587
hsairetrop04798	ENST00000422884	10	75491582	75492497	+	ENSMMUP00000030450	ENSMMUG00000023132	14	0.895	NA
hsa_retrom04728	ENST00000436122	10	76104305	76104563	-	ENSP00000450638	ENSG00000100575	14	0.83	0.2734
hsa_retrop05479	ENST00000417882	10	76131293	76132171	+	ENSP00000346067	ENSG00000168028	3	0.864	0.1079
hsa_retrom04741	ENST00000395972	10	76183191	76183861	-	ENSP00000411941	ENSG00000144566	3	0.533	4.9565
hsa_retrop05482	hsa_retrop05482	10	76287381	76287903	+	ENSP00000338389	ENSG00000132313	2	0.88	0.1048
hsairetrop04827	ENST00000398689	10	76414775	76415890	+	ENSGGOP00000007147	ENSGGOG00000007302	8	0.82	NA
hsa_retrom04756	ENST00000434706	10	76848993	76849448	-	ENSP00000419425	ENSG00000196262	7	0.927	0.1086
hsa_retrom04761	ENST00000416656	10	77142151	77142602	-	ENSP00000432305	ENSG00000064199	11	0.801	0.0787
hsa_retrop05490	hsa_retrop05490	10	78596222	78596566	+	ENSP00000348205	ENSG00000159199	17	0.862	0.12
hsairetrop04849	ENST00000394628	10	79491619	79494529	+	ENSMMUP00000001664	ENSMMUG00000001245	18	0.928	NA
hsa_retrom04781	ENST00000439688	10	79540095	79541643	-	ENSP00000265385	ENSG00000106348	7	0.878	0.1812
hsa_retrop05497	ENST00000446960	10	79713305	79713637	+	ENSP00000296417	ENSG00000164032	4	0.766	0.1058
hsa_retrop05507	ENST00000520547	10	81272376	81272867	+	ENSP00000336702	ENSG00000132507	17	0.97	0.0315
hsa_retrom04786	ENST00000455013	10	81784496	81784978	-	ENSP00000386468	ENSG00000197223	2	0.914	0.075
hsa_retrom04790	ENST00000418167	10	81791727	81792182	-	ENSP00000386468	ENSG00000197223	2	0.936	0.0817
hsa_retrom04794	ENST00000455429	10	81800380	81800832	-	ENSP00000384304	ENSG00000197223	2	0.882	0.1205
hsa_retrom04803	ENST00000441206	10	82006978	82007469	-	ENSP00000336702	ENSG00000132507	17	0.957	0.0279
hsa_retrom04807	ENST00000414704	10	82476242	82476824	-	ENSP00000385286	ENSG00000171863	2	0.747	0.3347
hsa_retrom04811	ENST00000419698	10	82896299	82897051	-	ENSP00000363021	ENSG00000117748	1	0.831	0.1385
hsa_retrom04816	ENST00000425565	10	86148923	86149372	-	ENSP00000354739	ENSG00000197958	9	0.767	0.3117
hsa_retrop05527	hsa_retrop05527	10	86320199	86321016	+	ENSP00000423953	ENSG00000145425	4	0.891	0.0203
hsa_retrop05530	ENST00000412054	10	87468514	87468924	+	ENSP00000272065	ENSG00000143727	2	0.706	0.4541
hsa_retrom04822	ENST00000540903	10	88390633	88391280	-	ENSP00000361076	ENSG00000148303	9	0.865	0.103
hsa_retrop05571	ENST00000395256	10	89705255	89705786	+	ENSP00000363676	ENSG00000142676	1	0.781	0.1781
hsa_retrom04828	ENST00000433316	10	90378039	90378644	-	ENSP00000339795	ENSG00000147604	8	0.735	0.3576
hsa_retrop05577	ENST00000441370	10	90487475	90488468	+	ENSP00000447881	ENSG00000170421	12	0.73	0.7835
hsa_retrop05585	ENST00000415579	10	90636144	90637299	+	ENSP00000308948	ENSG00000049883	5	0.668	0.2252
hsa_retrop05613	ENST00000450119	10	92812808	92814693	+	ENSP00000263239	ENSG00000088205	2	0.86	0.1232
hsa_retrom04840	hsa_retrom04840	10	92912354	92913315	-	ENSP00000424702	ENSG00000170502	4	0.761	0.7674
hsa_retrom04850	ENST00000455134	10	93426540	93427539	-	ENSP00000229239	ENSG00000111640	12	0.785	0.3512
hsa_retrom04852	ENST00000429974	10	93525659	93526965	-	ENSP00000261942	ENSG00000113194	5	0.775	0.1619
hsa_retrom04853	ENST00000445874	10	93566939	93567196	-	ENSP00000305230	ENSG00000143742	1	1	0
hsa_retrop05622	ENST00000398565	10	93878415	93878918	+	ENSP00000356953	ENSG00000143252	1	0.887	0.1084
hsa_retrop05624	ENST00000394444	10	93896646	93897427	+	ENSP00000413529	ENSG00000156976	3	0.755	58.3338
hsa_retrop05628	ENST00000335274	10	93976089	93976547	+	ENSP00000274606	ENSG00000145912	5	0.961	0.0453
hsa_retrom04857	ENST00000332269	10	94356618	94357009	-	ENSP00000398888	ENSG00000142676	1	0.731	0.232
hsa_retrom04858	ENST00000439671	10	94428505	94429500	-	ENSP00000364119	ENSG00000125977	20	0.919	0.0541
hsa_retrom04860	ENST00000433227	10	94866629	94867140	-	ENSP00000254940	ENSG00000132603	16	0.707	0.2154
hsa_retrom04863	ENST00000394133	10	95043858	95044295	-	ENSP00000389465	ENSG00000215472	18	0.938	0.102
hsa_retrom04867	ENST00000442978	10	95641046	95641695	-	ENSP00000261890	ENSG00000103769	15	0.783	0.1857
hsa_retrom04888	ENST00000480546	10	95719669	95721207	-	ENSP00000271663	ENSG00000143398	1	0.946	0.035
hsa_retrop05641	ENST00000455482	10	95897507	95898672	+	ENSP00000362649	ENSG00000116478	1	0.744	0.2829
hsairetrom04835	NA	10	96406747	96407668	-	ENSGALP00000015832	ENSGALG00000009738	6	0.691	NA
hsa_retrop05647	ENST00000458096	10	96642702	96643103	+	ENSP00000361071	ENSG00000148303	9	0.679	0.3823
hsa_retrop05652	ENST00000398190	10	97354364	97354964	+	ENSP00000346050	ENSG00000145425	4	0.896	0.0689
hsa_retrom04902	ENST00000415692	10	97759534	97760002	-	ENSP00000351021	ENSG00000122026	13	0.819	0.1178
hsa_retrop05661	ENST00000426339	10	98319942	98320558	+	ENSP00000377408	ENSG00000181163	5	0.844	0.0684
hsa_retrop05663	ENST00000439189	10	98510045	98510653	+	ENSP00000375730	ENSG00000142541	19	0.995	0.0149
hsa_retrom04907	ENST00000414870	10	99069315	99069715	-	ENSP00000354739	ENSG00000197958	9	0.866	0.1109
hsa_retrom04914	ENST00000442771	10	99152952	99153303	-	ENSP00000378163	ENSG00000109475	4	0.681	0.2857
hsa_retrom04917	ENST00000444698	10	100772860	100773212	-	ENSP00000406276	ENSG00000162980	2	0.907	0.0842
hsa_retrop05680	ENST00000444633	10	100807444	100808079	+	ENSP00000339795	ENSG00000147604	8	0.83	0.1147
hsa_retrom04923	ENST00000429190	10	101548320	101549100	-	ENSP00000435288	ENSG00000111704	12	0.584	0.4415
hsa_retrop05689	ENST00000453578	10	102008028	102008826	+	ENSP00000300408	ENSG00000167085	17	0.836	0.1288
hsa_retrom04941	ENST00000440453	10	104332517	104332901	-	ENSP00000389103	ENSG00000198242	17	0.907	0.1199
hsa_retrop05702	ENST00000426243	10	104605352	104605704	+	ENSP00000262033	ENSG00000110958	12	0.8	0.1582
hsa_retrom04942	ENST00000438729	10	104647629	104647921	-	ENSP00000346088	ENSG00000116251	1	0.859	0.2946
hsa_retrom04943	ENST00000445539	10	104884777	104885173	-	ENSP00000318646	ENSG00000134419	16	0.818	0.2379
hsa_retrop05707	ENST00000417082	10	104975466	104976072	+	ENSP00000438660	ENSG00000100380	22	0.851	0.0713
hsa_retrop05724	ENST00000441178	10	105005754	105006437	+	ENSP00000352401	ENSG00000197713	2	0.961	0.0385
hsa_retrom04966	ENST00000450091	10	107445140	107445623	-	ENSP00000419425	ENSG00000196262	7	0.798	0.2721
hsa_retrop05766	ENST00000419975	10	107446077	107446813	+	ENSP00000398599	ENSG00000164924	8	0.914	0.0156
hsa_retrop05773	ENST00000434943	10	111287877	111288769	+	ENSP00000441875	ENSG00000215021	12	0.757	0.313
hsa_retrop05775	ENST00000455606	10	111294413	111294768	+	ENSP00000338516	ENSG00000145741	5	0.636	0.2379
hsa_retrop05782	ENST00000429231	10	111567409	111567879	+	ENSP00000351021	ENSG00000122026	13	0.815	0.1424
hsa_retrop05783	ENST00000397433	10	112016822	112017046	+	ENSP00000434298	ENSG00000122026	13	0.684	0.2364
hsa_retrop05793	ENST00000428894	10	112210401	112210911	+	ENSP00000410354	ENSG00000029993	X	0.818	NA
hsa_retrom04973	ENST00000446943	10	112309873	112310567	-	ENSP00000339795	ENSG00000147604	8	0.763	0.2867
hsa_retrom04978	ENST00000430133	10	112696383	112696991	-	ENSP00000375730	ENSG00000142541	19	0.916	0.0655
hsa_retrom04981	ENST00000431996	10	113258009	113258699	-	ENSP00000369757	ENSG00000137154	9	0.73	NA
hsa_retrop05796	ENST00000420976	10	114747241	114747620	+	ENSP00000318646	ENSG00000134419	16	0.713	0.3799
hsa_retrop05808	ENST00000415988	10	115242384	115242869	+	ENSP00000419425	ENSG00000196262	7	0.758	0.224
hsa_retrop05816	ENST00000440070	10	115876906	115877281	+	ENSP00000360739	ENSG00000244687	20	0.781	0.2102
hsa_retrom04999	ENST00000486414	10	116449905	116450399	-	ENSP00000419425	ENSG00000196262	7	0.885	0.1178
hsa_retrop05823	ENST00000451124	10	118168769	118168951	+	ENSP00000272348	ENSG00000143977	2	0.79	0.1246
hsa_retrom05010	ENST00000449709	10	118199023	118199557	-	ENSP00000410354	ENSG00000029993	X	0.906	0.0993
hsa_retrop05826	ENST00000437011	10	118509417	118510157	+	ENSP00000359345	ENSG00000122406	1	0.751	0.29
hsa_retrom05013	ENST00000452430	10	118955688	118956119	-	ENSP00000354739	ENSG00000197958	9	0.78	0.3736
hsa_retrop05828	ENST00000450572	10	120403312	120403707	+	ENSP00000216034	ENSG00000100216	22	0.916	0.1116
hsa_retrom05019	ENST00000420302	10	120631564	120632114	-	ENSP00000397798	ENSG00000215472	18	0.929	0.0112
hsa_retrom05020	ENST00000394996	10	120692184	120692774	-	ENSP00000406172	ENSG00000134333	11	0.889	0.0922
hsa_retrop05836	ENST00000231383	10	121380580	121381416	+	ENSP00000340879	ENSG00000113456	5	0.897	0.0844
hsa_retrop05838	ENST00000454541	10	121397968	121398591	+	ENSP00000379888	ENSG00000142937	1	0.837	0.1391
hsa_retrom05023	ENST00000441872	10	121443047	121443280	-	ENSP00000363641	ENSG00000136810	9	0.833	0.0943
hsairetrom05050	NA	10	121756628	121757224	-	ENSMMUP00000004102	ENSMMUG00000003073	11	0.862	NA
hsa_retrom05039	ENST00000536557	10	122114216	122114695	-	ENSP00000346027	ENSG00000122026	13	1	0
hsa_retrop05841	ENST00000436276	10	123473121	123473492	+	ENSP00000318646	ENSG00000134419	16	0.855	0.1915
hsairetrop05396	hsairetrop05396	10	124653976	124654278	+	ENSPPYP00000012753	ENSPPYG00000011426	21	0.624	NA
hsa_retrom05049	ENST00000442662	10	126178786	126179147	-	ENSP00000347271	ENSG00000124614	6	0.762	0.2546
hsa_retrop05866	hsa_retrop05866	10	126556080	126556809	+	ENSP00000377408	ENSG00000181163	5	0.824	0.078
hsa_retrom05061	ENST00000398050	10	127355447	127356540	-	ENSP00000378669	ENSG00000149925	16	0.833	0.1701
hsa_retrop05877	ENST00000392696	10	127961387	127961982	+	ENSP00000362335	ENSG00000079332	10	0.653	0.2778
hsa_retrop05893	ENST00000435712	10	131904310	131906715	+	ENSP00000280083	ENSG00000150527	14	0.874	0.1107
hsa_retrom05080	ENST00000449940	10	131930037	131930453	-	ENSP00000419425	ENSG00000196262	7	0.755	0.165
hsa_retrom05088	ENST00000418634	10	134958104	134958808	-	ENSP00000359345	ENSG00000122406	1	0.852	0.1022
hsa_retrom05120	hsa_retrom05120	11	303857	304319	-	ENSP00000318158	ENSG00000062582	7	0.742	0.1837
hsa_retrop06038	ENST00000445859	11	1813756	1814115	+	ENSP00000404375	ENSG00000241343	X	0.896	0.1759
hsairetrom05236	NA	11	1824122	1825325	-	ENSMUSP00000130611	ENSMUSG00000029580	5	0.789	NA
hsa_retrom05170	ENST00000453533	11	2356545	2356979	-	ENSP00000430147	ENSG00000037241	5	0.979	0.0066
hsairetrop05558	NA	11	3297312	3297590	+	ENSPTRP00000047122	ENSPTRG00000019637	7	0.849	NA
hsairetrop05565	NA	11	3343128	3343406	+	ENSPTRP00000047122	ENSPTRG00000019637	7	0.849	NA
hsa_retrom05314	ENST00000426436	11	3570972	3571749	-	ENSP00000346050	ENSG00000145425	4	0.814	0.1134
hsairetrop05576	NA	11	3580887	3581248	+	ENSPTRP00000042761	ENSPTRG00000002666	10	0.657	NA
hsa_retrom05363	ENST00000396979	11	3848796	3849368	-	ENSP00000258737	ENSG00000136238	7	0.719	66.7072
hsa_retrom05384	ENST00000308739	11	3913626	3914123	-	ENSP00000419425	ENSG00000196262	7	0.915	0.0981
hsairetrom05340	ENST00000531069	11	4010390	4010692	-	ENSPTRP00000053956	ENSPTRG00000031426	21	0.921	NA
hsa_retrom05406	ENST00000528172	11	4231580	4233272	-	ENSP00000342830	ENSG00000137710	11	0.882	0.1127
hsa_retrop06087	ENST00000532495	11	4254518	4255099	+	ENSP00000291386	ENSG00000160075	1	0.706	1.2567
hsa_retrom05408	ENST00000524542	11	4263289	4263870	-	ENSP00000291386	ENSG00000160075	1	0.711	1.2642
hsa_retrop06090	ENST00000532644	11	4299937	4300422	+	ENSP00000291386	ENSG00000160075	1	0.735	1.1131
hsa_retrom05411	ENST00000530088	11	4308732	4309313	-	ENSP00000291386	ENSG00000160075	1	0.711	1.2435
hsa_retrop06093	ENST00000334468	11	4351095	4351676	+	ENSP00000291386	ENSG00000160075	1	0.716	1.1857
hsa_retrom05414	ENST00000532284	11	4359893	4360474	-	ENSP00000291386	ENSG00000160075	1	0.706	1.2812
hsa_retrom05492	hsa_retrom05492	11	4744171	4745426	-	ENSP00000449404	ENSG00000170421	12	0.868	0.2435
hsa_retrom05821	ENST00000441603	11	5592884	5593422	-	ENSP00000447782	ENSG00000135486	12	0.906	0.11
hsa_retrom05872	ENST00000527480	11	6015107	6016159	-	ENSP00000373489	ENSG00000111057	12	0.856	0.2358
hsa_retrom05912	ENST00000524809	11	6510065	6510607	-	ENSP00000390129	ENSG00000213585	5	0.788	0.231
hsa_retrom05919	ENST00000464563	11	6707119	6707589	-	ENSP00000351021	ENSG00000122026	13	0.778	0.2611
hsa_retrom05932	ENST00000530632	11	6864709	6865897	-	ENSP00000297540	ENSG00000164902	5	0.799	0.1731
hsa_retrop06597	ENST00000306904	11	7110352	7111455	+	ENSP00000359645	ENSG00000147274	X	0.739	3.3221	parental gene has paralogs on Y chromosome (ENSG00000234414, ENSG00000244395, ENSG00000242875, ENSG00000242389, ENSG00000226941, ENSG00000169800)
hsa_retrop06609	ENST00000480271	11	7805325	7805903	+	ENSP00000416638	ENSG00000148303	9	0.881	0.1346
hsa_retrop06653	ENST00000533985	11	9116001	9117277	+	ENSP00000449404	ENSG00000170421	12	0.814	0.3175
hsa_retrop06657	ENST00000475608	11	9627770	9628153	+	ENSP00000389103	ENSG00000198242	17	0.93	0.0415
hsa_retrop06662	ENST00000540439	11	9681985	9682464	+	ENSP00000370569	ENSG00000122026	13	0.956	0.0171
hsa_retrom05997	ENST00000533128	11	9980321	9981333	-	ENSP00000388535	ENSG00000135821	1	0.799	0.1336
hsa_retrop06673	ENST00000529697	11	11157029	11158283	+	ENSP00000379807	ENSG00000166669	16	0.776	0.1745
hsa_retrom06017	ENST00000528848	11	11373494	11374666	-	ENSP00000217244	ENSG00000101266	20	0.985	0.0063
hsa_retrom06028	ENST00000524621	11	11780649	11780897	-	ENSP00000426523	ENSG00000131508	5	0.723	2.0204
hsa_retrom06051	ENST00000530297	11	11878037	11878415	-	ENSP00000355781	ENSG00000163041	1	0.615	0.3514
hsa_retrom06075	ENST00000525966	11	14695150	14696101	-	ENSP00000408880	ENSG00000185787	15	0.927	0.1469
hsa_retrom06094	hsa_retrom06094	11	16505284	16506218	-	ENSP00000285930	ENSG00000085662	7	0.873	0.1647
hsa_retrom06102	ENST00000459748	11	16996228	16996590	-	ENSP00000404375	ENSG00000241343	X	1	0
hsa_retrom06107	ENST00000477436	11	17159526	17159863	-	ENSP00000378163	ENSG00000109475	4	0.885	0.0549
hsa_retrop06709	ENST00000443932	11	17249976	17250695	+	ENSP00000341885	ENSG00000140988	16	0.946	0.1222
hsa_retrom06122	ENST00000532834	11	17457222	17457728	-	ENSP00000356953	ENSG00000143252	1	0.893	0.0795
hsa_retrop06713	ENST00000529959	11	18128135	18128383	+	ENSP00000319393	ENSG00000181061	3	0.827	0.2804
hsa_retrop06729	ENST00000528859	11	18210547	18211170	+	ENSP00000315263	ENSG00000139433	12	0.933	0.1244
hsa_retrop06743	ENST00000526214	11	18283529	18284635	+	ENSP00000216218	ENSG00000100380	22	0.962	0.0265
hsa_retrom06155	ENST00000540201	11	18511786	18512501	-	ENSP00000300161	ENSG00000166913	20	0.861	0.1535
hsa_retrom06180	ENST00000532690	11	19296085	19296815	-	ENSP00000368458	ENSG00000132646	20	0.784	0.2827
hsa_retrop06753	ENST00000525269	11	21305327	21306479	+	ENSP00000217901	ENSG00000067829	X	0.652	1.0484
hsa_retrop06758	ENST00000531444	11	23425240	23427148	+	ENSP00000401180	ENSG00000011451	19	0.84	0.1521
hsa_retrop06760	ENST00000528321	11	23499919	23501976	+	ENSP00000260045	ENSG00000137492	11	0.75	0.2221
hsa_retrop06766	ENST00000474589	11	23542027	23542745	+	ENSP00000341885	ENSG00000140988	16	0.767	0.4056
hsa_retrom06188	ENST00000398926	11	25610024	25610377	-	ENSP00000404375	ENSG00000241343	X	0.847	1.1267
hsa_retrop06776	ENST00000540179	11	27603287	27603565	+	ENSP00000435096	ENSG00000118181	11	0.989	0.0507
hsa_retrop06781	ENST00000325243	11	27828076	27828531	+	ENSP00000336687	ENSG00000122565	7	0.914	0.125
hsairetrom06120	NA	11	27910949	27912580	-	ENSPTRP00000058433	ENSPTRG00000006736	14	0.96	NA
hsa_retrom06218	hsa_retrom06218	11	28166444	28166752	-	ENSP00000300688	ENSG00000167283	11	0.738	0.3771
hsairetrom06135	ENST00000449387	11	28308787	28309172	-	ENSMMUP00000007395	ENSMMUG00000005593	20	0.829	NA
hsairetrop06288	ENST00000525759	11	29297444	29297998	+	ENSMODP00000030006	ENSMODG00000018533	2	0.778	NA
hsa_retrop06789	ENST00000498657	11	29747395	29748039	+	ENSP00000361076	ENSG00000148303	9	0.847	0.1261
hsa_retrop06793	ENST00000488389	11	30389786	30390190	+	ENSP00000354739	ENSG00000197958	9	0.748	0.1947
hsa_retrop06798	ENST00000466686	11	32779814	32780160	+	ENSP00000423316	ENSG00000109475	4	0.786	0.1964
hsa_retrom06247	ENST00000500025	11	33211702	33212049	-	ENSP00000417048	ENSG00000162244	3	0.69	NA
hsairetrop06330	NA	11	33258554	33258952	+	ENSMMUP00000007295	ENSMMUG00000030562	9	0.89	NA
hsairetrom06180	ENST00000529152	11	33808600	33809332	-	ENSMODP00000003698	ENSMODG00000003044	8	0.735	NA
hsa_retrom06256	ENST00000531489	11	34356664	34357549	-	ENSP00000389060	ENSG00000168288	2	0.889	0.1172
hsa_retrop06816	hsa_retrop06816	11	34731157	34731708	+	ENSP00000299166	ENSG00000166136	10	0.652	0.3274
hsa_retrom06261	ENST00000534205	11	35881797	35882854	-	ENSP00000373487	ENSG00000111057	12	0.875	0.1802
hsa_retrom06263	ENST00000529830	11	35988563	35990220	-	ENSP00000380675	ENSG00000214102	7	0.731	0.1789
hsa_retrop06848	ENST00000476420	11	37747300	37748006	+	ENSP00000361076	ENSG00000148303	9	0.699	0.4775
hsa_retrop06857	ENST00000486306	11	39183003	39183498	+	ENSP00000407348	ENSG00000063177	19	0.88	0.299
hsa_retrom06271	ENST00000525564	11	40105320	40106067	-	ENSP00000369546	ENSG00000131732	5	0.689	0.3027
hsa_retrop06862	ENST00000489849	11	41559984	41560533	+	ENSP00000400467	ENSG00000163682	4	0.717	0.2735
hsairetrom06234	ENST00000511537	11	43283833	43284975	-	ENSMMUP00000012171	ENSMMUG00000018871	15	0.726	NA
hsa_retrop06877	ENST00000529659	11	43487942	43488421	+	ENSP00000419425	ENSG00000196262	7	0.72	0.2708
hsa_retrop06891	ENST00000526402	11	43543526	43544814	+	ENSP00000357816	ENSG00000175029	10	0.832	0.1803
hsa_retrop06895	ENST00000498752	11	43740307	43740693	+	ENSP00000389103	ENSG00000198242	17	0.899	0.1068
hsa_retrop06903	ENST00000532859	11	43755309	43756092	+	ENSP00000300408	ENSG00000167085	17	0.905	0.1883
hsa_retrop06910	ENST00000534767	11	43919006	43921047	+	ENSP00000389838	ENSG00000129657	17	0.869	0.1346
hsa_retrom06280	ENST00000525465	11	44561332	44561655	-	ENSP00000361071	ENSG00000148303	9	0.843	0.2975
hsa_retrom06296	ENST00000467930	11	46450245	46450700	-	ENSP00000347271	ENSG00000124614	6	0.993	0.0069
hsa_retrom06317	ENST00000473109	11	47212743	47213093	-	ENSP00000427788	ENSG00000008988	8	0.966	0.082
hsa_retrom06331	ENST00000524963	11	47926875	47927159	-	ENSP00000223641	ENSG00000106803	9	0.947	0.1249
hsa_retrom06414	hsa_retrom06414	11	49119713	49123478	-	ENSP00000263577	ENSG00000064309	11	0.75	0.2462
hsa_retrom06422	ENST00000526165	11	49455028	49455990	-	ENSP00000306328	ENSG00000171612	1	0.984	0.0063
hsa_retrop07237	ENST00000525487	11	50227332	50228440	+	ENSP00000239231	ENSG00000120137	5	0.916	0.0546
hsa_retrom06806	ENST00000532142	11	55972600	55973100	-	ENSP00000240922	ENSG00000121579	3	0.817	0.1479
hsa_retrom06857	ENST00000528813	11	56098823	56099964	-	ENSP00000259963	ENSG00000137414	6	0.76	0.1707
hsa_retrop07794	ENST00000482972	11	56124845	56125694	+	ENSP00000359345	ENSG00000122406	1	0.866	0.0652
hsa_retrop07907	ENST00000525853	11	56263257	56263892	+	ENSP00000284440	ENSG00000154277	4	0.64	0.4133
hsa_retrop07910	ENST00000532561	11	56277115	56277672	+	ENSP00000422542	ENSG00000154277	4	0.618	0.4081
hsa_retrop07941	hsa_retrop07941	11	56457754	56458195	+	ENSP00000368579	ENSG00000089063	20	0.95	0.0396
hsa_retrom07166	ENST00000483219	11	57343768	57344516	-	ENSP00000362744	ENSG00000198034	X	0.873	0.0595
hsa_retrom07183	ENST00000530952	11	57485521	57486002	-	ENSP00000419425	ENSG00000196262	7	0.901	0.1213
hsa_retrom07189	ENST00000530974	11	57637798	57638043	-	ENSP00000339720	ENSG00000189043	7	0.707	0.2124
hsa_retrom07244	ENST00000525903	11	58009515	58010569	-	ENSP00000348925	ENSG00000156976	3	0.794	0.1514
hsa_retrom07391	ENST00000529148	11	58563710	58564330	-	ENSP00000351380	ENSG00000198498	4	0.836	0.1705
hsa_retrom07427	ENST00000524732	11	59548789	59549193	-	ENSP00000297258	ENSG00000164687	8	1	0
hsa_retrop08190	hsa_retrop08190	11	59665673	59666607	+	ENSP00000264228	ENSG00000128039	4	0.816	0.1239
hsa_retrop08235	ENST00000496593	11	61404152	61404958	+	ENSP00000339027	ENSG00000089157	12	0.896	0.098
hsa_retrom07448	ENST00000491725	11	61779226	61779938	-	ENSP00000341885	ENSG00000140988	16	0.814	0.3887
hsa_retrop08262	ENST00000533043	11	62098420	62099288	+	ENSP00000428755	ENSG00000181163	5	0.878	0.1138
hsa_retrop08266	ENST00000526625	11	62139447	62140644	+	ENSP00000364582	ENSG00000179051	1	0.913	0.1025
hsa_retrom07477	ENST00000536213	11	62799979	62800575	-	ENSP00000430642	ENSG00000164611	5	0.784	0.1279
hsa_retrop08301	ENST00000472881	11	62814257	62815593	+	ENSP00000248437	ENSG00000127824	2	0.765	0.2442
hsa_retrom07483	ENST00000498718	11	62883451	62883810	-	ENSP00000420673	ENSG00000162244	3	0.8	0.072
hsa_retrop08306	ENST00000539268	11	63010885	63011506	+	ENSP00000261254	ENSG00000118971	12	0.798	0.2631
hsa_retrop08318	hsa_retrop08318	11	63399711	63400192	+	ENSP00000435576	ENSG00000148950	11	0.881	0.0567
hsa_retrop08355	ENST00000428947	11	64649024	64649334	+	ENSP00000251453	ENSG00000105193	19	0.692	0.3248
hsa_retrom07532	ENST00000527837	11	64913165	64913464	-	ENSP00000398064	ENSG00000181061	3	0.86	0.1402
hsa_retrom07533	ENST00000534819	11	64942509	64942919	-	ENSP00000400512	ENSG00000171314	10	0.949	0.0357
hsa_retrop08405	ENST00000534154	11	65494627	65495459	+	ENSP00000448048	ENSG00000170421	12	0.758	0.4993
hsa_retrop08420	ENST00000528671	11	66221705	66222049	+	ENSP00000453964	ENSG00000164241	5	0.896	0.0792
hsa_retrom07579	ENST00000528754	11	66529049	66529870	-	ENSP00000225698	ENSG00000108561	17	0.827	0.1676
hsairetrom07240	ENST00000426387	11	67419725	67420432	-	ENSMUSP00000021406	ENSMUSG00000062198	12	0.685	NA
hsa_retrom07594	ENST00000472498	11	67450266	67450529	-	ENSP00000274242	ENSG00000145592	5	0.886	0.0235
hsa_retrom07622	ENST00000480160	11	67693125	67693902	-	ENSP00000346050	ENSG00000145425	4	0.822	0.1082
hsa_retrom07657	ENST00000413963	11	69552113	69552784	-	ENSP00000400665	ENSG00000105993	7	0.839	0.1849
hsa_retrom07683	ENST00000534148	11	70125021	70125341	-	ENSP00000296417	ENSG00000164032	4	0.804	0.1219
hsa_retrop08495	ENST00000462701	11	71380635	71381340	+	ENSP00000346050	ENSG00000145425	4	0.784	0.1042
hsa_retrom07697	ENST00000542775	11	71960894	71962332	-	ENSP00000233668	ENSG00000115325	2	0.819	0.1033
hsa_retrop08531	ENST00000464109	11	72419298	72419607	+	ENSP00000230050	ENSG00000112306	6	0.645	0.6777
hsa_retrop08542	ENST00000439829	11	72651543	72652151	+	ENSP00000309334	ENSG00000174748	3	0.842	0.0969
hsa_retrom07706	ENST00000543613	11	73632717	73633237	-	ENSP00000228825	ENSG00000111229	12	0.902	0.1751
hsa_retrom07713	ENST00000534962	11	73702324	73703223	-	ENSP00000335306	ENSG00000121570	3	0.761	0.1574
hsairetrop07585	ENST00000426371	11	74065491	74066259	+	ENSGGOP00000002992	ENSGGOG00000003040	12	0.911	NA
hsa_retrom07719	ENST00000524889	11	74196616	74196965	-	ENSP00000260443	ENSG00000137876	15	0.748	0.3192
hsa_retrom07724	ENST00000461163	11	74449536	74449859	-	ENSP00000404375	ENSG00000241343	X	0.731	0.2623
hsa_retrom07729	ENST00000428553	11	74456764	74457159	-	ENSP00000230050	ENSG00000112306	6	0.97	0.0351
hsa_retrop08588	ENST00000525104	11	74630632	74631007	+	ENSP00000264258	ENSG00000071082	2	0.848	0.115
hsa_retrom07735	ENST00000532878	11	74790305	74791174	-	ENSP00000296930	ENSG00000181163	5	0.871	0.099
hsa_retrom07741	ENST00000525622	11	75622244	75622633	-	ENSP00000257905	ENSG00000135447	12	0.645	0.2575
hsa_retrom07746	ENST00000530091	11	75653169	75653477	-	ENSP00000376076	ENSG00000116030	2	0.65	0.3175
hsa_retrop08625	ENST00000534518	11	77024653	77025042	+	ENSP00000355566	ENSG00000173726	1	0.9	0.0696
hsa_retrom07768	hsa_retrom07768	11	77445523	77446255	-	ENSP00000384656	ENSG00000167996	11	0.893	0.0607
hsa_retrom07773	ENST00000404439	11	77524406	77524722	-	ENSP00000009589	ENSG00000008988	8	0.84	0.1166
hsa_retrom07778	ENST00000495378	11	77579768	77580241	-	ENSP00000370574	ENSG00000122026	13	0.799	NA
hsa_retrop08647	hsa_retrop08647	11	78095254	78096782	+	ENSP00000359802	ENSG00000186376	X	0.824	0.1183
hsa_retrop08651	ENST00000528393	11	79698556	79700675	+	ENSP00000376586	ENSG00000135336	6	0.885	0.1028
hsa_retrom07798	ENST00000524544	11	80364505	80365028	-	ENSP00000440010	ENSG00000170540	16	0.81	0.0613
hsa_retrop08652	ENST00000531124	11	80668392	80668679	+	ENSP00000229379	ENSG00000111775	12	0.619	0.4526
hsa_retrop08653	ENST00000536099	11	82400601	82400765	+	ENSP00000397872	ENSG00000233927	19	1	0
hsa_retrop08663	ENST00000525361	11	82668551	82669224	+	ENSP00000361076	ENSG00000148303	9	0.719	0.3175
hsa_retrom07803	ENST00000527291	11	82817616	82817892	-	ENSP00000258424	ENSG00000135940	2	0.645	0.2976
hsa_retrop08668	ENST00000533906	11	82920441	82920659	+	ENSP00000311083	ENSG00000173207	1	0.945	0.0461
hsa_retrom07808	hsa_retrom07808	11	83525620	83526488	-	ENSP00000280706	ENSG00000166800	11	0.689	0.3327
hsa_retrop08685	ENST00000472460	11	84351036	84351605	+	ENSP00000346022	ENSG00000163682	4	0.818	0.153
hsairetrom07538	ENST00000532151	11	84708278	84708684	-	ENSGGOP00000002701	ENSGGOG00000002741	1	0.537	NA
hsa_retrop08686	hsa_retrop08686	11	85568129	85569420	+	ENSP00000217426	ENSG00000101444	20	0.782	0.3743
hsa_retrop08688	ENST00000528351	11	85645822	85646628	+	ENSP00000215882	ENSG00000100075	22	0.844	0.3144
hsa_retrop08694	ENST00000530657	11	85906320	85907307	+	ENSP00000303423	ENSG00000168522	8	0.909	0.05
hsa_retrop08698	ENST00000534163	11	86005857	86006505	+	ENSP00000361777	ENSG00000119335	9	0.79	0.1726
hsa_retrop08711	ENST00000531034	11	86143141	86143618	+	ENSP00000359685	ENSG00000112245	6	0.812	0.2892
hsa_retrom07839	hsa_retrom07839	11	86532185	86532858	-	ENSP00000315702	ENSG00000115540	2	0.842	0.1222
hsa_retrom07856	ENST00000528959	11	86969894	86970285	-	ENSP00000216034	ENSG00000100216	22	0.832	0.1544
hsa_retrom07858	ENST00000526365	11	87040398	87041092	-	ENSP00000223321	ENSG00000106588	7	0.732	0.2656
hsa_retrom07869	ENST00000528472	11	87191835	87192355	-	ENSP00000410354	ENSG00000029993	X	0.713	0.1576
hsa_retrom07877	ENST00000515281	11	88141350	88142391	-	ENSP00000380070	ENSG00000111640	12	0.84	0.2362
hsa_retrom07880	ENST00000532876	11	89026912	89027298	-	ENSP00000379670	ENSG00000122565	7	0.746	0.3103
hsa_retrom07886	ENST00000532005	11	89231913	89232260	-	ENSP00000355778	ENSG00000163041	1	0.706	0.5874
hsa_retrop08733	ENST00000527668	11	89464182	89467951	+	ENSP00000263577	ENSG00000064309	11	0.748	0.2313
hsa_retrom07896	ENST00000531260	11	89630414	89633617	-	ENSP00000263577	ENSG00000064309	11	0.744	0.2194
hsa_retrop08775	ENST00000530835	11	90015814	90017132	+	ENSP00000336799	ENSG00000123416	12	0.945	0.0451
hsa_retrop08780	ENST00000497708	11	91894378	91895056	+	ENSP00000361076	ENSG00000148303	9	0.758	0.228
hsa_retrom07901	ENST00000455818	11	92069204	92069584	-	ENSP00000367042	ENSG00000147123	X	0.787	0.138
hsa_retrom07902	ENST00000503887	11	92099818	92100416	-	ENSP00000359991	ENSG00000171314	10	0.795	0.2329
hsa_retrom07912	ENST00000471604	11	92231354	92232100	-	ENSP00000346050	ENSG00000145425	4	0.743	0.26
hsa_retrop08783	ENST00000533275	11	92670609	92670827	+	ENSP00000272348	ENSG00000143977	2	0.743	0.1998
hsa_retrom07919	ENST00000463604	11	92785564	92785993	-	ENSP00000293842	ENSG00000161970	17	0.772	0.3809
hsa_retrop08792	ENST00000533701	11	93268635	93268879	+	ENSP00000453120	ENSG00000140319	15	0.926	0.1091
hsa_retrom07926	ENST00000527217	11	93342942	93343561	-	ENSP00000436490	ENSG00000156239	21	0.855	0.156
hsa_retrom07928	ENST00000446318	11	93788771	93789138	-	ENSP00000425035	ENSG00000167085	17	0.748	0.1359
hsa_retrom07930	ENST00000397300	11	93921618	93922163	-	ENSP00000228825	ENSG00000111229	12	0.94	0.0341
hsa_retrop08804	ENST00000439405	11	94646212	94646820	+	ENSP00000438660	ENSG00000100380	22	0.901	0.0916
hsa_retrop08828	ENST00000472927	11	95696383	95696785	+	ENSP00000380158	ENSG00000144713	3	0.765	0.3097
hsa_retrop08831	ENST00000533268	11	100207650	100208354	+	ENSP00000363021	ENSG00000117748	1	0.827	0.1288
hsa_retrop08838	ENST00000527147	11	100537160	100537687	+	ENSP00000419425	ENSG00000196262	7	0.884	0.0933
hsa_retrom07948	ENST00000530032	11	101636666	101637891	-	ENSP00000445339	ENSG00000102024	X	0.561	65.4298
hsa_retrop08859	ENST00000463969	11	102165791	102166471	+	ENSP00000369757	ENSG00000137154	9	0.807	0.1631
hsa_retrom07958	ENST00000546014	11	102677676	102678632	-	ENSP00000261798	ENSG00000113712	5	0.816	0.2007
hsa_retrop08866	ENST00000463339	11	102915966	102916151	+	ENSP00000434298	ENSG00000122026	13	0.75	0.139
hsa_retrop08870	ENST00000302259	11	103907551	103908738	+	ENSP00000417748	ENSG00000197312	1	0.714	1.5021
hsa_retrop08878	ENST00000531988	11	105577025	105578524	+	ENSP00000373620	ENSG00000144381	2	0.646	0.4818
hsa_retrom08005	ENST00000531301	11	106697121	106698616	-	ENSP00000240651	ENSG00000121350	12	0.968	0.0314
hsa_retrop08883	ENST00000526512	11	107047012	107048253	+	ENSP00000361471	ENSG00000130707	9	0.867	0.14
hsa_retrom08015	ENST00000417747	11	107274173	107275261	-	ENSP00000441857	ENSG00000073584	17	0.853	0.0863
hsa_retrom08016	ENST00000532684	11	107471135	107471440	-	ENSP00000395792	ENSG00000138382	2	0.658	0.2332
hsa_retrom08025	ENST00000492327	11	108561098	108561566	-	ENSP00000433034	ENSG00000140988	16	0.758	0.8423
hsa_retrop08895	ENST00000481955	11	109852918	109853772	+	ENSP00000346067	ENSG00000168028	3	0.76	0.2623
hsa_retrop08896	ENST00000525414	11	109920253	109920879	+	ENSP00000215587	ENSG00000099817	19	0.852	0.2796
hsa_retrom08036	ENST00000415310	11	110659133	110659711	-	ENSP00000447260	ENSG00000135486	12	0.889	0.0679
hsa_retrom08039	ENST00000475609	11	110976271	110976619	-	ENSP00000346046	ENSG00000182774	15	0.709	0.3744
hsa_retrom08055	ENST00000425960	11	111541680	111543149	-	ENSP00000449404	ENSG00000170421	12	0.74	0.5936
hsa_retrom08059	ENST00000494116	11	111759926	111760180	-	ENSP00000418082	ENSG00000197756	2	0.859	0.1602
hsa_retrom08076	ENST00000428428	11	111900591	111901091	-	ENSP00000306614	ENSG00000171960	1	0.88	0.1097
hsa_retrop08907	ENST00000534436	11	112079326	112079618	+	ENSP00000256441	ENSG00000134056	5	0.743	0.3702
hsa_retrop08908	ENST00000393032	11	112089049	112089440	+	ENSP00000230050	ENSG00000112306	6	0.742	0.1772
hsa_retrom08083	ENST00000479691	11	112106159	112106748	-	ENSP00000369757	ENSG00000137154	9	0.746	0.2495
hsa_retrom08087	ENST00000526466	11	112138476	112139094	-	ENSP00000438660	ENSG00000100380	22	0.899	0.0818
hsa_retrop08913	ENST00000321235	11	113582445	113583106	+	ENSP00000356200	ENSG00000112031	6	0.83	0.0971
hsa_retrop08916	ENST00000397185	11	113640382	113640678	+	ENSP00000234301	ENSG00000115944	2	0.788	0.2282
hsa_retrop08922	ENST00000544730	11	113659989	113660721	+	ENSP00000369981	ENSG00000107295	9	0.672	4.8223
hsa_retrop08947	ENST00000536916	11	114453975	114455128	+	ENSP00000362649	ENSG00000116478	1	0.777	0.1945
hsa_retrom08110	ENST00000475768	11	115820914	115821519	-	ENSP00000309334	ENSG00000174748	3	0.803	0.1081
hsa_retrop08961	ENST00000465511	11	118431405	118432292	+	ENSP00000359345	ENSG00000122406	1	0.889	0.0601
hsa_retrom08137	ENST00000531054	11	118704590	118705188	-	ENSP00000361777	ENSG00000119335	9	0.805	0.1887
hsa_retrom08142	ENST00000469465	11	118873725	118874082	-	ENSP00000389103	ENSG00000198242	17	0.744	0.2373
hsa_retrom08206	ENST00000533003	11	119473575	119475079	-	ENSP00000449404	ENSG00000170421	12	0.89	0.214
hsa_retrom08214	ENST00000527539	11	119692133	119693008	-	ENSP00000392669	ENSG00000198563	6	0.835	0.0822
hsa_retrom08229	ENST00000532126	11	120806972	120807364	-	ENSP00000382412	ENSG00000189403	13	0.68	0.2354
hsairetrom08043	ENST00000451822	11	121232571	121233653	-	ENSOANP00000014179	ENSOANG00000008907	Ultra334	0.974	NA
hsa_retrom08243	ENST00000526011	11	122484155	122485272	-	ENSP00000307900	ENSG00000135821	1	0.859	0.1001
hsa_retrop08973	ENST00000526403	11	122831035	122831793	+	ENSP00000358737	ENSG00000116459	1	0.764	0.1406
hsa_retrop08977	ENST00000532044	11	122888399	122889369	+	ENSP00000270225	ENSG00000142230	19	0.894	0.0803
hsa_retrop08983	ENST00000469983	11	122906602	122906922	+	ENSP00000423983	ENSG00000109475	4	0.755	0.2065
hsa_retrop08988	ENST00000479573	11	122921883	122922119	+	ENSP00000408172	ENSG00000071082	2	0.667	0.2243
hsa_retrom08250	ENST00000527351	11	123006673	123007082	-	ENSP00000367284	ENSG00000069509	X	0.876	0.1472
hsa_retrom08252	ENST00000528675	11	123468654	123470160	-	ENSP00000362110	ENSG00000183431	1	0.917	0.0731
hsa_retrom08454	ENST00000533974	11	124677755	124678164	-	ENSP00000306906	ENSG00000168894	2	0.679	0.1987
hsa_retrop09153	ENST00000524879	11	124983742	124984755	+	ENSP00000373489	ENSG00000111057	12	0.774	0.284
hsa_retrop09172	ENST00000524793	11	125937519	125938308	+	ENSP00000447793	ENSG00000187109	12	0.901	0.0616
hsa_retrom08472	ENST00000526843	11	127810828	127811550	-	ENSP00000397556	ENSG00000105993	7	0.979	0.0047
hsa_retrom08494	ENST00000531501	11	129165190	129166338	-	ENSP00000322265	ENSG00000177842	3	0.704	0.2632
hsa_retrom08497	ENST00000535377	11	129902762	129903115	-	ENSP00000386652	ENSG00000103363	16	0.941	0.2655
hsa_retrop09198	hsa_retrop09198	11	130165046	130166825	+	ENSP00000263239	ENSG00000088205	2	0.873	0.1613
hsa_retrom08508	ENST00000532665	11	130416694	130417322	-	ENSP00000353878	ENSG00000030110	6	0.915	0.2286
hsa_retrom08515	ENST00000529222	11	133734698	133735513	-	ENSP00000263097	ENSG00000064666	19	0.812	0.4032
hsa_retrom08528	ENST00000534330	11	133993722	133994222	-	ENSP00000344909	ENSG00000184007	1	0.91	0.074
hsa_retrom08539	ENST00000493072	12	1866400	1867177	-	ENSP00000362744	ENSG00000198034	X	0.886	0.116
hsa_retrop09214	ENST00000468281	12	2891154	2891534	+	ENSP00000389103	ENSG00000198242	17	0.835	0.2351
hsa_retrom08545	ENST00000425943	12	3180712	3181311	-	ENSP00000375730	ENSG00000142541	19	0.88	0.1508
hsa_retrop09252	ENST00000456928	12	4206617	4208584	+	ENSP00000433316	ENSG00000109971	11	0.91	0.089
hsa_retrom08560	ENST00000489396	12	4218875	4219384	-	ENSP00000084795	ENSG00000063177	19	0.692	0.5699
hsairetrom08378	ENST00000493323	12	4433541	4433977	-	ENSGGOP00000002777	ENSGGOG00000002818	19	0.878	NA
hsairetrom08384	ENST00000538921	12	4711359	4712586	-	ENSPPYP00000000619	ENSPPYG00000000533	1	0.854	NA
hsa_retrom08573	ENST00000537929	12	4744511	4745001	-	ENSP00000273047	ENSG00000144566	3	0.872	0.083
hsa_retrop09297	ENST00000545761	12	5692963	5693250	+	ENSP00000349679	ENSG00000125971	20	0.75	0.0789
hsa_retrom08589	ENST00000498412	12	6518886	6519179	-	ENSP00000412976	ENSG00000071082	2	0.939	0.0759
hsa_retrop09300	ENST00000425281	12	6547674	6547964	+	ENSP00000267884	ENSG00000140319	15	0.907	0.2125
hsa_retrop09303	ENST00000541242	12	6586881	6589373	+	ENSP00000342800	ENSG00000057294	12	0.913	0.086
hsa_retrop09329	ENST00000441655	12	6993317	6993762	+	ENSP00000376811	ENSG00000167526	16	0.753	0.6706
hsa_retrop09348	ENST00000504533	12	6994066	6994518	+	ENSP00000246069	ENSG00000125868	20	0.89	0.1822
hsa_retrop09352	ENST00000468816	12	7139412	7139702	+	ENSP00000274242	ENSG00000145592	5	0.701	0.1237
hsa_retrop09359	ENST00000509325	12	7718965	7719949	+	ENSP00000380070	ENSG00000111640	12	0.733	0.4627
hsa_retrom08631	ENST00000417799	12	7756945	7757806	-	ENSP00000285814	ENSG00000155438	2	0.835	0.1208
hsa_retrop09368	ENST00000544818	12	7759436	7759929	+	ENSP00000242284	ENSG00000122705	9	0.812	NA
hsa_retrop09377	ENST00000480485	12	8013036	8013363	+	ENSP00000427788	ENSG00000008988	8	0.664	0.4249
hsa_retrop09380	ENST00000536322	12	8023492	8023898	+	ENSP00000279022	ENSG00000101335	20	0.828	0.2686
hsa_retrom08641	hsa_retrom08641	12	8286370	8287447	-	ENSP00000259915	ENSG00000204531	6	0.967	0.0262
hsa_retrom08642	ENST00000538792	12	8294922	8295303	-	ENSP00000319531	ENSG00000140905	16	0.677	0.2879
hsa_retrom08662	ENST00000479743	12	8511653	8512430	-	ENSP00000346050	ENSG00000145425	4	0.826	0.1351
hsa_retrop09403	ENST00000477936	12	8613214	8613825	+	ENSP00000388529	ENSG00000174748	3	0.858	0.0563
hsa_retrom08690	ENST00000501248	12	8664968	8665320	-	ENSP00000225504	ENSG00000213246	17	0.873	0.0733
hsa_retrop09407	ENST00000497462	12	8895054	8895641	+	ENSP00000410848	ENSG00000168028	3	0.727	0.2612
hsa_retrop09421	ENST00000544463	12	9188898	9189831	+	ENSP00000361686	ENSG00000165637	10	0.732	0.2234
hsa_retrop09427	ENST00000426641	12	9794314	9795604	+	ENSP00000245206	ENSG00000125166	16	0.852	0.1143
hsa_retrop09436	ENST00000396690	12	9847980	9848818	+	ENSP00000377408	ENSG00000181163	5	0.907	0.075
hsa_retrop09450	ENST00000406003	12	10264378	10265070	+	ENSP00000348093	ENSG00000197451	5	0.866	0.0587
hsa_retrop09455	ENST00000538173	12	10658502	10659917	+	ENSP00000253039	ENSG00000130741	X	0.985	0.048
hsairetrop08640	ENST00000412576	12	10922906	10923205	+	ENSMUSP00000074724	ENSMUSG00000073676	1	0.804	NA
hsa_retrop09461	ENST00000453927	12	11634297	11634594	+	ENSP00000398064	ENSG00000181061	3	0.7	0.3446
hsa_retrop09465	hsa_retrop09465	12	11665641	11667046	+	ENSP00000238146	ENSG00000111364	12	0.824	0.2044
hsa_retrop09471	ENST00000472093	12	12308196	12308515	+	ENSP00000434298	ENSG00000122026	13	0.91	0.0832
hsa_retrom08787	hsa_retrom08787	12	12352986	12353771	-	ENSP00000408880	ENSG00000185787	15	0.88	0.152
hsa_retrop09477	hsa_retrop09477	12	12401945	12402361	+	ENSP00000360739	ENSG00000244687	20	0.864	0.0953
hsairetrom08641	ENST00000483524	12	12721162	12721628	-	ENSMMUP00000000399	ENSMMUG00000004235	16	0.71	NA
hsa_retrom08799	ENST00000464893	12	12993738	12994013	-	ENSP00000418082	ENSG00000197756	2	0.783	0.3096
hsa_retrop09490	ENST00000475592	12	13003916	13004608	+	ENSP00000369757	ENSG00000137154	9	0.866	0.0803
hsa_retrop09492	ENST00000424500	12	13028433	13029041	+	ENSP00000375730	ENSG00000142541	19	0.931	0.0411
hsa_retrop09498	ENST00000538670	12	13154433	13155761	+	ENSP00000277874	ENSG00000148680	10	0.835	0.2361
hsa_retrom08835	ENST00000428182	12	15408147	15408740	-	ENSP00000407180	ENSG00000123600	2	0.849	0.0242
hsa_retrop09550	ENST00000469884	12	15592619	15593335	+	ENSP00000341885	ENSG00000140988	16	0.842	0.2492
hsa_retrom08839	ENST00000541727	12	16124823	16125543	-	ENSP00000250457	ENSG00000129521	14	0.701	0.3367
hsa_retrom08841	ENST00000537175	12	16552212	16555354	-	ENSP00000216297	ENSG00000092201	14	0.921	0.0597
hsa_retrop09553	hsa_retrop09553	12	16666418	16667601	+	ENSP00000245206	ENSG00000125166	16	0.81	0.2476
hsa_retrop09561	ENST00000444513	12	17142060	17142497	+	ENSP00000331708	ENSG00000113558	5	0.904	0.0832
hsa_retrop09570	ENST00000325349	12	17143604	17144974	+	ENSP00000330054	ENSG00000156508	6	0.865	0.1115
hsa_retrop09576	ENST00000481703	12	17274769	17275338	+	ENSP00000379729	ENSG00000147604	8	0.716	0.3507
hsa_retrom08853	ENST00000536820	12	17536286	17537459	-	ENSP00000261303	ENSG00000100764	14	0.839	0.1031
hsa_retrop09579	ENST00000545713	12	17553333	17553836	+	ENSP00000365766	ENSG00000126768	X	0.905	0.1136
hsa_retrop09608	ENST00000396338	12	18845841	18847030	+	ENSP00000261303	ENSG00000100764	14	0.94	0.028
hsa_retrop09614	ENST00000449390	12	19242127	19242822	+	ENSP00000339795	ENSG00000147604	8	0.953	0.0434
hsa_retrom08856	ENST00000502742	12	19260788	19261117	-	ENSP00000424833	ENSG00000254901	19	0.882	0.3912
hsa_retrop09618	ENST00000543528	12	19566087	19566391	+	ENSP00000221784	ENSG00000105185	19	0.932	0.1151
hsa_retrom08867	ENST00000359165	12	19609182	19610582	-	ENSP00000339053	ENSG00000156508	6	0.884	0.0717
hsa_retrop09623	ENST00000498395	12	19661838	19662179	+	ENSP00000378163	ENSG00000109475	4	0.772	0.1703
hsa_retrop09630	ENST00000414406	12	20094306	20095949	+	ENSP00000317334	ENSG00000120438	6	0.914	0.0927
hsa_retrop09631	ENST00000540175	12	20704719	20705942	+	ENSP00000379936	ENSG00000034063	19	0.99	0.0405
hsa_retrop09640	hsa_retrop09640	12	24736120	24737483	+	ENSP00000219837	ENSG00000103550	16	0.827	0.1609
hsa_retrom08886	ENST00000555897	12	25245676	25246783	-	ENSP00000281453	ENSG00000151725	4	0.734	0.286
hsa_retrop09650	ENST00000543961	12	25956522	25957460	+	ENSP00000266775	ENSG00000139372	12	0.958	0.0429
hsa_retrop09679	ENST00000418882	12	27855273	27855749	+	ENSP00000384678	ENSG00000189403	13	0.72	0.367
hsa_retrom08908	ENST00000463466	12	28717710	28718074	-	ENSP00000418868	ENSG00000162244	3	0.846	0.1363
hsa_retrom08909	ENST00000480369	12	29811525	29811731	-	ENSP00000434298	ENSG00000122026	13	0.783	0.0844
hsa_retrop09690	hsa_retrop09690	12	31397374	31397619	+	ENSP00000339720	ENSG00000189043	7	0.695	0.2166
hsa_retrom08913	ENST00000495623	12	31404926	31405530	-	ENSP00000375730	ENSG00000142541	19	0.96	0.064
hsa_retrop09699	ENST00000544433	12	31630483	31630918	+	ENSP00000338057	ENSG00000185414	2	0.76	0.2197
hsa_retrom08928	ENST00000418260	12	31768705	31769373	-	ENSP00000445912	ENSG00000162433	1	0.991	0.0129
hsa_retrom08933	ENST00000399727	12	31868276	31868715	-	ENSP00000363409	ENSG00000117632	1	0.758	0.1492
hsa_retrom08956	ENST00000340398	12	31944696	31945100	-	ENSP00000355781	ENSG00000163041	1	0.956	18.1911
hsa_retrop09713	ENST00000484010	12	32101268	32101761	+	ENSP00000354739	ENSG00000197958	9	0.903	0.1222
hsa_retrop09716	ENST00000534895	12	32160061	32160363	+	ENSP00000418348	ENSG00000187118	3	0.631	0.1015
hsairetrom08831	ENST00000549976	12	32380622	32381088	-	ENSPTRP00000016413	ENSPTRG00000009660	17	0.718	NA
hsa_retrom08976	ENST00000550917	12	32879317	32880321	-	ENSP00000448167	ENSG00000187109	12	0.876	0.0644
hsa_retrop09735	ENST00000553060	12	33138774	33140001	+	ENSP00000361471	ENSG00000130707	9	0.883	0.141
hsa_retrop09741	ENST00000393026	12	33607281	33608390	+	ENSP00000216218	ENSG00000100380	22	0.814	0.1964
hsa_retrop09745	ENST00000540219	12	34402421	34402890	+	ENSP00000370201	ENSG00000085231	5	0.854	0.0761
hsa_retrom09029	ENST00000549020	12	38472331	38472780	-	ENSP00000370201	ENSG00000085231	5	0.907	0.1135
hsa_retrom09035	ENST00000418873	12	40462048	40462392	-	ENSP00000428085	ENSG00000156482	8	0.809	0.2498
hsa_retrop09783	ENST00000548175	12	41122710	41123699	+	ENSP00000440993	ENSG00000164024	4	0.7	0.3784
hsa_retrom09039	hsa_retrom09039	12	42463778	42464263	-	ENSP00000422338	ENSG00000150756	5	0.77	0.392
hsa_retrop09793	ENST00000550858	12	42680713	42682359	+	ENSP00000320204	ENSG00000073792	3	0.91	0.0721
hsa_retrom09051	hsa_retrom09051	12	42825965	42827159	-	ENSP00000388828	ENSG00000114416	3	0.875	0.0777
hsa_retrom09052	ENST00000550326	12	43030621	43030943	-	ENSP00000363041	ENSG00000122873	10	0.917	0.091
hsa_retrom09059	ENST00000551909	12	43447899	43448187	-	ENSP00000256441	ENSG00000134056	5	0.77	0.4192
hsa_retrom09060	ENST00000479116	12	43954840	43955100	-	ENSP00000434298	ENSG00000122026	13	0.908	0.1147
hsa_retrom09062	ENST00000551685	12	43963575	43965841	-	ENSP00000260045	ENSG00000137492	11	0.897	0.0753
hsa_retrop09800	ENST00000547505	12	44053674	44054901	+	ENSP00000339053	ENSG00000156508	6	0.873	0.0999
hsa_retrom09075	ENST00000546499	12	44402426	44403940	-	ENSP00000359802	ENSG00000186376	X	0.76	0.1483
hsa_retrom09076	ENST00000548007	12	44642238	44642787	-	ENSP00000307958	ENSG00000173389	3	0.62	0.2072
hsa_retrom09099	ENST00000550663	12	45457259	45459134	-	ENSP00000449370	ENSG00000161800	12	0.87	0.0618
hsairetrop09022	NA	12	45465561	45465986	+	ENSGGOP00000011224	ENSGGOG00000011507	2b	0.804	NA
hsa_retrom09105	ENST00000256692	12	45566940	45568496	-	ENSP00000397947	ENSG00000106086	7	0.952	0.019
hsa_retrom09109	hsa_retrom09109	12	46274742	46275962	-	ENSP00000219837	ENSG00000103550	16	0.674	0.381
hsa_retrop09811	hsa_retrop09811	12	46289927	46290134	+	ENSP00000386974	ENSG00000257529	X	0.768	2.073
hsa_retrom09115	ENST00000480555	12	46397948	46398427	-	ENSP00000375730	ENSG00000142541	19	0.613	0.9023
hsa_retrop09820	ENST00000432328	12	47628847	47630142	+	ENSP00000353868	ENSG00000132635	20	0.538	1.7096
hsa_retrom09136	ENST00000546707	12	47735397	47735769	-	ENSP00000419425	ENSG00000196262	7	0.736	0.4304
hsa_retrom09151	ENST00000468202	12	48448769	48449036	-	ENSP00000274242	ENSG00000145592	5	0.775	0.2072
hsairetrom09007	ENST00000551045	12	48554133	48554488	-	ENSGALP00000021792	ENSGALG00000013382	18	0.694	NA
hsa_retrom09166	ENST00000546648	12	48562633	48563442	-	ENSP00000300408	ENSG00000167085	17	0.871	0.1642
hsa_retrop09835	ENST00000266594	12	48866448	48866927	+	ENSP00000453838	ENSG00000140350	15	0.862	0.0683
hsa_retrop09837	ENST00000494130	12	48881772	48882215	+	ENSP00000347271	ENSG00000124614	6	0.796	0.0895
hsairetrop09078	hsairetrop09078	12	48922092	48922405	+	ENSPTRP00000029963	ENSPTRG00000017544	5	0.738	NA
hsa_retrom09181	hsa_retrom09181	12	49194357	49194883	-	ENSP00000382580	ENSG00000101220	20	0.805	0.3563
hsa_retrom09188	ENST00000489971	12	49297201	49297602	-	ENSP00000380158	ENSG00000144713	3	0.924	0.1232
hsa_retrop09862	ENST00000551907	12	49783474	49783945	+	ENSP00000323763	ENSG00000111790	12	0.861	0.1322
hsa_retrop09868	ENST00000547655	12	49988966	49989471	+	ENSP00000366711	ENSG00000116288	1	0.858	0.1862
hsa_retrop09873	ENST00000550710	12	50013093	50013395	+	ENSP00000398064	ENSG00000181061	3	0.822	0.2146
hsairetrop09140	hsairetrop09140	12	50102829	50103115	+	ENSGGOP00000001126	ENSGGOG00000001142	2a	0.701	NA
hsa_retrop09894	ENST00000498788	12	50759435	50759869	+	ENSP00000293842	ENSG00000161970	17	0.855	0.1356
hsa_retrom09248	ENST00000547512	12	51518426	51519153	-	ENSP00000393320	ENSG00000167085	17	0.828	0.2488
hsa_retrom09253	ENST00000547726	12	52106761	52107309	-	ENSP00000447782	ENSG00000135486	12	0.836	4.185
hsa_retrop09919	ENST00000549824	12	53142562	53143882	+	ENSP00000278174	ENSG00000148925	11	0.914	0.0542
hsa_retrop09920	ENST00000550907	12	53157306	53157674	+	ENSP00000219204	ENSG00000102931	16	0.846	0.3099
hsa_retrop09921	ENST00000547968	12	53176434	53176595	+	ENSP00000397872	ENSG00000233927	19	0.667	0.6105
hsa_retrop09927	ENST00000485823	12	53279560	53280114	+	ENSP00000379730	ENSG00000147604	8	0.805	0.2644
hsa_retrop09929	ENST00000550220	12	53525134	53525771	+	ENSP00000450731	ENSG00000100568	14	0.716	0.2313
hsa_retrop09935	ENST00000550979	12	53535813	53536115	+	ENSP00000398064	ENSG00000181061	3	0.98	0.0716
hsa_retrop09941	ENST00000550578	12	53547056	53548271	+	ENSP00000293831	ENSG00000161960	17	0.916	0.076
hsa_retrom09278	ENST00000462065	12	54026565	54026876	-	ENSP00000264258	ENSG00000071082	2	0.845	0.165
hsa_retrom09304	ENST00000552982	12	55196527	55197371	-	ENSP00000378487	ENSG00000213585	5	0.894	0.0955
hsa_retrom09361	ENST00000554248	12	56048342	56048952	-	ENSP00000225426	ENSG00000108294	17	0.805	0.2553
hsa_retrom09367	ENST00000550756	12	56263832	56264383	-	ENSP00000340167	ENSG00000138430	2	0.729	0.2282
hsa_retrom09384	ENST00000552016	12	56374212	56374817	-	ENSP00000357564	ENSG00000143545	1	0.98	0.0242
hsa_retrop10234	ENST00000547203	12	56904786	56906451	+	ENSP00000373620	ENSG00000144381	2	0.948	0.0595
hsa_retrop10248	ENST00000557452	12	57265494	57266112	+	ENSP00000371267	ENSG00000134308	2	0.78	0.3165
hsa_retrom09438	ENST00000551532	12	58378006	58378544	-	ENSP00000438660	ENSG00000100380	22	0.877	0.1039
hsa_retrop10305	ENST00000479921	12	58638292	58638645	+	ENSP00000370569	ENSG00000122026	13	0.778	0.1221
hsa_retrop10318	ENST00000552027	12	58788392	58788920	+	ENSP00000272102	ENSG00000143761	1	0.723	0.5287
hsa_retrop10321	ENST00000497406	12	59413950	59414525	+	ENSP00000369757	ENSG00000137154	9	0.789	0.1387
hsa_retrom09443	ENST00000550567	12	59446764	59447965	-	ENSP00000384369	ENSG00000169519	11	0.904	0.1036
hsa_retrop10333	ENST00000464143	12	62169707	62170181	+	ENSP00000370574	ENSG00000122026	13	0.786	0.1671
hsa_retrop10343	ENST00000551916	12	62273130	62274348	+	ENSP00000447566	ENSG00000170421	12	0.835	0.3322
hsairetrom09283	ENST00000487417	12	62415416	62415954	-	ENSGALP00000027953	ENSGALG00000017330	1	0.872	NA
hsa_retrom09456	ENST00000547105	12	62628183	62629296	-	ENSP00000361373	ENSG00000171872	1	0.792	0.1321
hsa_retrop10352	ENST00000480482	12	63052603	63052999	+	ENSP00000388674	ENSG00000144713	3	0.842	0.1275
hsa_retrop10357	ENST00000513513	12	63149010	63150010	+	ENSP00000380068	ENSG00000111640	12	0.88	0.2532
hsa_retrop10361	ENST00000484568	12	63359105	63359488	+	ENSP00000443391	ENSG00000188846	3	0.953	0.0261
hsa_retrop10363	ENST00000546650	12	63396252	63396575	+	ENSP00000356112	ENSG00000215712	6	0.917	0.0633
hsa_retrop10387	ENST00000502352	12	63397333	63398468	+	ENSP00000280706	ENSG00000166800	11	0.773	0.3389
hsa_retrom09458	ENST00000553036	12	63449123	63449545	-	ENSP00000260443	ENSG00000137876	15	0.745	0.16
hsa_retrop10391	ENST00000552536	12	63665181	63665682	+	ENSP00000447782	ENSG00000135486	12	0.75	0.1532
hsa_retrop10420	ENST00000539977	12	64216151	64217677	+	ENSP00000429594	ENSG00000070756	8	0.898	0.0873
hsa_retrom09472	ENST00000493820	12	64265522	64265854	-	ENSP00000404375	ENSG00000241343	X	0.819	0.8478
hsa_retrop10423	ENST00000536546	12	64660202	64660548	+	ENSP00000359384	ENSG00000203907	6	0.759	0.155
hsairetrom09331	ENST00000545001	12	64731959	64732573	-	ENSMMUP00000028293	ENSMMUG00000021477	10	0.757	NA
hsa_retrop10427	ENST00000535684	12	64790313	64790777	+	ENSP00000270625	ENSG00000142534	19	0.735	0.5388
hsa_retrom09481	ENST00000481157	12	65261736	65262431	-	ENSP00000339795	ENSG00000147604	8	0.797	0.2388
hsairetrop09714	ENST00000536787	12	65528475	65529052	+	ENSMUSP00000109530	ENSMUSG00000079508	X	0.679	NA
hsa_retrom09484	ENST00000312876	12	65812505	65813536	-	ENSP00000373489	ENSG00000111057	12	0.817	0.1638
hsa_retrom09486	ENST00000493929	12	66151998	66152660	-	ENSP00000410848	ENSG00000168028	3	0.842	0.1292
hsa_retrop10433	ENST00000469899	12	66431015	66431491	+	ENSP00000370569	ENSG00000122026	13	0.894	0.0644
hsa_retrom09505	ENST00000417216	12	66627856	66629001	-	ENSP00000294904	ENSG00000153250	2	0.966	0.0129
hsa_retrop10434	ENST00000542687	12	67745283	67745821	+	ENSP00000333401	ENSG00000185608	22	0.646	0.2674
hsa_retrop10454	ENST00000420836	12	68429547	68430116	+	ENSP00000447260	ENSG00000135486	12	0.758	0.1837
hsa_retrop10462	ENST00000216407	12	68867506	68868684	+	ENSP00000401802	ENSG00000100519	14	0.893	0.0885
hsa_retrom09519	ENST00000483913	12	68946778	68947662	-	ENSP00000346067	ENSG00000168028	3	0.963	0.0209
hsa_retrom09522	ENST00000414313	12	69036297	69036773	-	ENSP00000301587	ENSG00000167863	17	0.938	0.0636
hsa_retrop10475	ENST00000396270	12	69099351	69100848	+	ENSP00000449404	ENSG00000170421	12	0.839	0.2992
hsa_retrop10490	ENST00000548895	12	69678177	69679267	+	ENSP00000223122	ENSG00000106392	7	0.843	0.1396
hsa_retrop10499	ENST00000546381	12	71065698	71066638	+	ENSP00000272610	ENSG00000144199	2	0.869	0.1248
hsa_retrom09541	ENST00000550293	12	72243062	72244161	-	ENSP00000367637	ENSG00000124532	6	0.838	0.0879
hsairetrom09423	ENST00000547971	12	72825518	72825784	-	ENSMUSP00000125754	ENSMUSG00000060743	1	0.772	NA
hsa_retrop10511	ENST00000474343	12	74042493	74042819	+	ENSP00000386681	ENSG00000071082	2	0.78	0.1539
hsa_retrop10512	ENST00000548427	12	74686104	74686878	+	ENSP00000357556	ENSG00000151650	10	0.746	0.2073
hsairetrop09793	ENST00000550926	12	74931893	74932174	+	ENSMMUP00000034346	ENSMMUG00000029935	16	0.654	NA
hsa_retrom09550	ENST00000441072	12	75057580	75057921	-	ENSP00000268607	ENSG00000140941	16	0.817	0.1136
hsa_retrom09559	ENST00000547218	12	75121860	75122627	-	ENSP00000339917	ENSG00000187325	X	0.58	0.8134
hsa_retrom09560	ENST00000549521	12	75651542	75652217	-	ENSP00000426476	ENSG00000138764	4	0.647	0.5278
hsa_retrop10522	ENST00000552477	12	76451318	76451898	+	ENSP00000280557	ENSG00000139726	12	0.903	0.102
hsa_retrop10524	ENST00000553021	12	76531205	76532392	+	ENSP00000358059	ENSG00000130347	6	0.894	0.1013
hsa_retrop10526	ENST00000484287	12	76993535	76994247	+	ENSP00000361076	ENSG00000148303	9	0.832	0.208
hsa_retrop10532	ENST00000485945	12	77054185	77054664	+	ENSP00000370574	ENSG00000122026	13	0.969	0.0077
hsa_retrop10536	ENST00000478876	12	77115378	77116066	+	ENSP00000339795	ENSG00000147604	8	0.735	0.2962
hsa_retrop10543	ENST00000548926	12	77151002	77151615	+	ENSP00000420357	ENSG00000111832	6	0.908	0.0646
hsa_retrom09569	ENST00000418757	12	78524113	78524693	-	ENSP00000361259	ENSG00000122378	10	0.726	0.2229
hsa_retrom09578	ENST00000546724	12	79187414	79187897	-	ENSP00000005257	ENSG00000006451	7	0.858	0.1649
hsa_retrop10550	ENST00000488396	12	80422719	80423405	+	ENSP00000339795	ENSG00000147604	8	0.878	0.1488
hsa_retrom09585	ENST00000492623	12	80496679	80497113	-	ENSP00000293842	ENSG00000161970	17	0.945	0.0627
hsairetrom09489	ENST00000547384	12	80954801	80955141	-	ENSMMUP00000012274	ENSMMUG00000009373	1	0.621	NA
hsa_retrop10563	ENST00000464696	12	83545110	83545966	+	ENSP00000202773	ENSG00000089009	12	0.885	0.1026
hsa_retrom09587	hsa_retrom09587	12	84842409	84843398	-	ENSP00000261015	ENSG00000138442	2	0.71	NA
hsa_retrop10564	ENST00000546698	12	85065434	85065745	+	ENSP00000317780	ENSG00000178741	15	0.655	0.2365
hsa_retrom09595	ENST00000549998	12	86175669	86176226	-	ENSP00000452823	ENSG00000184277	15	0.717	0.2788
hsa_retrom09607	ENST00000480924	12	87563762	87564127	-	ENSP00000389103	ENSG00000198242	17	0.659	0.2733
hsa_retrom09616	ENST00000546624	12	88176898	88178177	-	ENSP00000255977	ENSG00000133606	7	0.9	0.0839
hsa_retrop10570	ENST00000489210	12	88344003	88344602	+	ENSP00000362744	ENSG00000198034	X	0.734	0.3574
hsa_retrop10575	ENST00000533085	12	89893870	89896716	+	ENSP00000273853	ENSG00000145241	4	0.915	0.0431
hsa_retrom09624	ENST00000548729	12	89916593	89918326	-	ENSP00000364150	ENSG00000119514	9	0.578	38.2326
hsa_retrop10579	ENST00000546688	12	90146691	90147607	+	ENSP00000373404	ENSG00000112651	6	0.794	0.1053
hsa_retrop10584	ENST00000496249	12	92562176	92562653	+	ENSP00000370574	ENSG00000122026	13	0.8	0.1499
hsa_retrop10588	ENST00000552900	12	92924296	92925095	+	ENSP00000303222	ENSG00000109919	11	0.766	0.2554
hsa_retrop10594	ENST00000551090	12	93251865	93253048	+	ENSP00000303147	ENSG00000168906	2	0.868	0.1113
hsa_retrop10599	ENST00000546565	12	93277538	93278111	+	ENSP00000447260	ENSG00000135486	12	0.91	0.0511
hsa_retrop10601	hsa_retrop10601	12	93429041	93429520	+	ENSP00000339250	ENSG00000187569	12	0.75	0.0424
hsairetrom09579	NA	12	93517879	93518310	-	ENSGALP00000000669	ENSGALG00000000489	E22C19W28_E50C23	0.868	NA
hsa_retrom09655	ENST00000548270	12	94034601	94035362	-	ENSP00000359991	ENSG00000171314	10	1	0.0043
hsa_retrom09672	ENST00000525031	12	94817632	94818744	-	ENSP00000262031	ENSG00000076067	12	0.976	0.0093
hsa_retrom09677	ENST00000551218	12	94914869	94915647	-	ENSP00000296802	ENSG00000164346	5	0.915	0.0702
hsa_retrop10622	ENST00000307241	12	94942095	94943273	+	ENSP00000307432	ENSG00000172340	3	0.947	0.0332
hsa_retrop10623	ENST00000551246	12	94984597	94984869	+	ENSP00000302160	ENSG00000170860	3	0.835	0.0786
hsa_retrop10631	ENST00000557173	12	95228004	95228931	+	ENSP00000355124	ENSG00000171345	17	0.765	0.2287
hsa_retrop10632	ENST00000553003	12	95494307	95494792	+	ENSP00000342026	ENSG00000117592	1	0.739	0.3301
hsa_retrop10634	ENST00000470084	12	95519536	95519913	+	ENSP00000443391	ENSG00000188846	3	0.825	0.0688
hsa_retrom09684	ENST00000552017	12	95680099	95680582	-	ENSP00000379670	ENSG00000122565	7	0.861	0.2031
hsa_retrom09691	ENST00000478358	12	95861173	95861637	-	ENSP00000418153	ENSG00000162244	3	0.931	0.0222
hsa_retrop10640	ENST00000548011	12	96066081	96066841	+	ENSP00000359991	ENSG00000171314	10	0.87	0.1173
hsairetrom09635	NA	12	97295647	97296476	-	ENSMMUP00000014115	ENSMMUG00000004852	4	0.732	NA
hsa_retrom09706	ENST00000554613	12	98126378	98127045	-	ENSP00000435289	ENSG00000168092	11	0.718	0.2778
hsa_retrop10646	ENST00000547032	12	98711471	98712107	+	ENSP00000441449	ENSG00000139146	12	0.731	0.2309
hsa_retrom09707	ENST00000554295	12	98848659	98850698	-	ENSP00000408680	ENSG00000181804	3	0.604	2.911
hsa_retrom09722	ENST00000557282	12	98984504	98984983	-	ENSP00000419425	ENSG00000196262	7	0.854	0.1443
hsa_retrop10653	ENST00000549019	12	99188396	99188745	+	ENSP00000260443	ENSG00000137876	15	0.898	0.0451
hsairetrom09676	hsairetrom09676	12	100330672	100331042	-	ENSGGOP00000026272	ENSGGOG00000006432	2a	0.738	NA
hsa_retrom09732	ENST00000482189	12	100402814	100403646	-	ENSP00000362744	ENSG00000198034	X	0.878	0.097
hsa_retrop10657	ENST00000547380	12	100972522	100973972	+	ENSP00000369820	ENSG00000165195	X	0.864	0.151
hsa_retrop10668	ENST00000547000	12	101462036	101463010	+	ENSP00000404448	ENSG00000089006	20	0.893	0.1009
hsa_retrop10682	ENST00000547454	12	104424557	104425318	+	ENSP00000359991	ENSG00000171314	10	0.996	0.0061
hsa_retrop10685	ENST00000462885	12	104659087	104659614	+	ENSP00000222247	ENSG00000105640	19	0.994	0
hsa_retrop10688	ENST00000527879	12	104697713	104698711	+	ENSP00000358019	ENSG00000107672	10	0.527	0.9297
hsa_retrop10698	ENST00000548397	12	104907807	104908214	+	ENSP00000377033	ENSG00000159199	17	0.846	0.08
hsa_retrom09748	ENST00000548986	12	105370589	105371575	-	ENSP00000373489	ENSG00000111057	12	0.874	0.135
hsa_retrop10707	ENST00000546640	12	106409675	106410778	+	ENSP00000216218	ENSG00000100380	22	0.938	0.0312
hsa_retrop10715	ENST00000474666	12	107304557	107304887	+	ENSP00000428085	ENSG00000156482	8	0.757	0.3299
hsa_retrop10724	ENST00000488371	12	108113376	108113830	+	ENSP00000389465	ENSG00000215472	18	0.801	0.2781
hsa_retrom09764	ENST00000547904	12	108297026	108297575	-	ENSP00000402524	ENSG00000071994	6	0.877	0.0855
hsairetrom09738	ENST00000548873	12	108675312	108676012	-	ENSPTRP00000024786	ENSPTRG00000014387	22	0.647	NA
hsa_retrop10746	ENST00000490759	12	110898793	110899167	+	ENSP00000264258	ENSG00000071082	2	0.896	0.0777
hsa_retrom09792	ENST00000552501	12	112107745	112108166	-	ENSP00000265260	ENSG00000081154	3	0.88	0.0979
hsairetrom09766	ENST00000493495	12	112317493	112318048	-	ENSGGOP00000021640	ENSGGOG00000009371	16	0.576	NA
hsa_retrom09793	ENST00000549244	12	112438544	112438789	-	ENSP00000256433	ENSG00000134049	18	0.854	0.1729
hsa_retrom09796	ENST00000469026	12	112739677	112740389	-	ENSP00000361076	ENSG00000148303	9	0.903	0.0915
hsa_retrop10789	ENST00000552954	12	113453412	113453897	+	ENSP00000278200	ENSG00000148950	11	0.855	0.0739
hsa_retrop10790	ENST00000460336	12	113491911	113492240	+	ENSP00000318646	ENSG00000134419	16	0.704	0.5209
hsa_retrop10801	ENST00000550242	12	115026047	115026607	+	ENSP00000340836	ENSG00000134996	9	0.872	0.1923
hsa_retrom09821	ENST00000486088	12	116030417	116030788	-	ENSP00000388107	ENSG00000221983	19	0.849	0.359
hsa_retrop10816	ENST00000306985	12	117013748	117014122	+	ENSP00000268607	ENSG00000140941	16	0.992	0.012
hsa_retrop10822	ENST00000358708	12	118684048	118684767	+	ENSP00000341885	ENSG00000140988	16	0.992	0.044
hsa_retrom09828	ENST00000490729	12	119175769	119176204	-	ENSP00000352143	ENSG00000215472	18	0.74	0.386
hsa_retrop10824	ENST00000392530	12	119632655	119633083	+	ENSP00000222968	ENSG00000106244	7	0.944	0.0482
hsa_retrop10844	ENST00000426182	12	120720040	120720516	+	ENSP00000426901	ENSG00000011052	17	0.947	0.0784
hsa_retrom09843	ENST00000407532	12	120888307	120888567	-	ENSP00000408172	ENSG00000071082	2	0.782	0.4413
hsa_retrom09846	ENST00000495697	12	121031818	121032351	-	ENSP00000363676	ENSG00000142676	1	0.761	0.1461
hsa_retrom09857	ENST00000392493	12	121282915	121283450	-	ENSP00000440005	ENSG00000143761	1	0.832	0.2772
hsa_retrop10873	ENST00000431907	12	121352207	121352926	+	ENSP00000364935	ENSG00000213719	6	0.858	0.1641
hsa_retrop10875	ENST00000485633	12	121354548	121355039	+	ENSP00000354739	ENSG00000197958	9	0.921	0.1088
hsairetrop10343	ENST00000399532	12	122849812	122850176	+	ENSGGOP00000002951	ENSGGOG00000003002	13	0.935	NA
hsa_retrom09893	ENST00000480427	12	125420053	125420349	-	ENSP00000346088	ENSG00000116251	1	0.879	0.1026
hsairetrop10375	ENST00000538133	12	127396684	127396869	+	ENSMODP00000015398	ENSMODG00000012295	4	0.758	NA
hsa_retrom09902	ENST00000539058	12	129428819	129429338	-	ENSP00000371230	ENSG00000147853	9	0.817	0.0858
hsa_retrom09909	ENST00000540993	12	132611007	132611281	-	ENSP00000399700	ENSG00000145287	4	0.935	0.1113
hsa_retrop10948	ENST00000488441	12	133402287	133402769	+	ENSP00000270625	ENSG00000142534	19	0.907	0.0453
hsa_retrop10957	ENST00000546033	12	133610105	133610556	+	ENSP00000344909	ENSG00000184007	1	0.789	0.2174
hsa_retrop11020	ENST00000465341	12	133702189	133702554	+	ENSP00000389103	ENSG00000198242	17	0.737	0.2625
hsa_retrop11038	ENST00000342224	13	19254635	19255843	+	ENSP00000276602	ENSG00000147601	8	0.936	0.0269
hsa_retrop11040	ENST00000447172	13	19271145	19271651	+	ENSP00000380926	ENSG00000160256	21	0.988	0.0417
hsa_retrom09943	hsa_retrom09943	13	19298554	19299779	-	ENSP00000280876	ENSG00000151233	12	0.795	0.1696
hsa_retrop11047	ENST00000330492	13	19300842	19301586	+	ENSP00000263097	ENSG00000064666	19	0.823	0.492
hsa_retrom09949	ENST00000452841	13	19466930	19469135	-	ENSP00000265909	ENSG00000120451	11	0.851	0.0995
hsa_retrom09961	ENST00000400109	13	19878732	19879900	-	ENSP00000264995	ENSG00000114686	3	0.914	0.0702
hsa_retrop11053	ENST00000428076	13	19956585	19957245	+	ENSP00000384396	ENSG00000147382	X	0.919	0.0709
hsa_retrom09969	ENST00000400596	13	20134156	20135305	-	ENSP00000385971	ENSG00000173153	11	0.908	0.0737
hsa_retrom09977	ENST00000456608	13	20137732	20139040	-	ENSP00000299957	ENSG00000166734	15	0.895	0.0704
hsa_retrom09993	ENST00000458378	13	20753120	20753601	-	ENSP00000419425	ENSG00000196262	7	0.721	0.2501
hsa_retrop11059	ENST00000419313	13	21181218	21182269	+	ENSP00000387152	ENSG00000127526	19	0.838	0.3328
hsa_retrop11064	ENST00000454001	13	21535487	21536334	+	ENSP00000346067	ENSG00000168028	3	0.982	0.0569
hsa_retrom10023	ENST00000419579	13	21668485	21668853	-	ENSP00000230050	ENSG00000112306	6	0.886	0.0792
hsa_retrop11071	ENST00000418437	13	21834475	21835719	+	ENSP00000385971	ENSG00000173153	11	0.903	0.0715
hsa_retrop11086	ENST00000400595	13	21893295	21894944	+	ENSP00000348230	ENSG00000198055	5	0.888	0.1781
hsa_retrop11090	ENST00000449535	13	21932681	21933450	+	ENSP00000380065	ENSG00000111640	12	0.619	0.7616
hsa_retrom10026	ENST00000464254	13	22202573	22203154	-	ENSP00000385286	ENSG00000171863	2	0.974	0.0397
hsa_retrom10036	ENST00000450676	13	23270165	23270701	-	ENSP00000273550	ENSG00000167996	11	0.95	0.0394
hsa_retrom10056	ENST00000445147	13	23279293	23280344	-	ENSP00000242776	ENSG00000123136	19	0.682	0.4319
hsa_retrom10058	hsa_retrom10058	13	23411162	23412337	-	ENSP00000363046	ENSG00000151151	10	0.89	0.0576
hsa_retrop11093	ENST00000422350	13	23424240	23424647	+	ENSP00000309229	ENSG00000175449	5	0.934	0.0507
hsa_retrop11094	ENST00000417358	13	23489831	23490662	+	ENSP00000357480	ENSG00000153989	6	0.903	0.1056
hsa_retrop11101	ENST00000423502	13	24902564	24903210	+	ENSP00000357480	ENSG00000153989	6	0.94	0.1075
hsairetrom10088	ENST00000431005	13	25278519	25278926	-	ENSMMUP00000011468	ENSMMUG00000003448	16	0.594	NA
hsa_retrom10072	ENST00000428810	13	25562716	25563063	-	ENSP00000423983	ENSG00000109475	4	0.862	0.0493
hsa_retrop11144	ENST00000281589	13	25670337	25672229	+	ENSP00000313007	ENSG00000070756	8	0.92	0.0831
hsa_retrom10076	ENST00000447693	13	25939940	25940293	-	ENSP00000386652	ENSG00000103363	16	0.898	0.2343
hsa_retrom10085	hsa_retrom10085	13	26691685	26692744	-	ENSP00000357932	ENSG00000143363	1	0.841	0.1523
hsa_retrop11159	ENST00000425466	13	27151023	27151812	+	ENSP00000346050	ENSG00000145425	4	0.891	0.0755
hsa_retrom10100	ENST00000456044	13	27591691	27592026	-	ENSP00000009589	ENSG00000008988	8	0.786	0.1701
hsairetrop10644	ENST00000302979	13	28197043	28197357	+	ENSOANP00000013871	ENSOANG00000008708	Ultra519	0.819	NA
hsa_retrom10107	ENST00000414095	13	28270536	28271341	-	ENSP00000341168	ENSG00000181163	5	0.679	0.2587
hsa_retrop11179	ENST00000417549	13	28788705	28790031	+	ENSP00000330054	ENSG00000156508	6	0.824	0.1505
hsa_retrop11191	ENST00000421800	13	29172975	29174186	+	ENSP00000293831	ENSG00000161960	17	0.889	0.1106
hsa_retrom10112	ENST00000419457	13	29296522	29297499	-	ENSP00000406757	ENSG00000001630	7	0.957	0.019
hsa_retrop11198	ENST00000425504	13	29880915	29881919	+	ENSP00000380070	ENSG00000111640	12	0.845	0.1806
hsa_retrop11210	ENST00000450181	13	30870284	30870869	+	ENSP00000301522	ENSG00000167815	19	0.843	0.1828
hsa_retrop11217	ENST00000436446	13	31002128	31002589	+	ENSP00000344259	ENSG00000185651	22	0.974	0.0522
hsa_retrop11221	ENST00000433704	13	31127808	31128950	+	ENSP00000320298	ENSG00000175354	18	0.896	0.0864
hsa_retrop11254	ENST00000453244	13	35825200	35825816	+	ENSP00000426433	ENSG00000167085	17	0.697	NA
hsa_retrop11259	ENST00000428620	13	37496676	37497043	+	ENSP00000424183	ENSG00000109270	4	0.847	0.1159
hsa_retrom10168	ENST00000428062	13	37512458	37513663	-	ENSP00000293831	ENSG00000161960	17	0.868	0.1319
hsa_retrom10183	ENST00000379800	13	37678461	37679366	-	ENSP00000261798	ENSG00000113712	5	0.927	0.2198
hsa_retrom10203	ENST00000420325	13	38567300	38568857	-	ENSP00000373620	ENSG00000144381	2	0.772	0.1882
hsa_retrom10206	ENST00000447765	13	39191559	39192119	-	ENSP00000349432	ENSG00000165672	10	0.624	0.3049
hsa_retrom10241	ENST00000400429	13	41744839	41745332	-	ENSP00000349467	ENSG00000198668	14	0.893	24.9698
hsa_retrom10255	ENST00000450245	13	41773947	41774797	-	ENSP00000452808	ENSG00000185787	15	0.612	0.4477
hsa_retrom10269	ENST00000416129	13	41861880	41862456	-	ENSP00000258737	ENSG00000136238	7	0.798	0.2177
hsa_retrop11283	ENST00000451871	13	42499861	42501484	+	ENSP00000303043	ENSG00000065427	16	0.8	0.1671
hsa_retrop11284	ENST00000435020	13	42577568	42577732	+	ENSP00000397872	ENSG00000233927	19	0.709	1.1174
hsa_retrom10293	ENST00000403865	13	42643082	42645229	-	ENSP00000261845	ENSG00000069956	15	0.912	0.0557
hsa_retrom10298	ENST00000458199	13	42943398	42943793	-	ENSP00000362817	ENSG00000121769	1	0.826	0.2111
hsa_retrop11292	ENST00000396712	13	43508041	43508751	+	ENSP00000379941	ENSG00000136247	7	0.686	0.3075
hsairetrop10816	ENST00000430744	13	43968679	43968965	+	ENSMUSP00000079340	ENSMUSG00000057863	17	0.688	NA
hsa_retrop11310	ENST00000378718	13	44542560	44545332	+	ENSP00000391021	ENSG00000149091	11	0.983	0.021
hsa_retrop11317	ENST00000422303	13	45026761	45026976	+	ENSP00000261692	ENSG00000111328	12	0.512	0.7903
hsa_retrop11323	ENST00000412207	13	45169048	45170174	+	ENSP00000445370	ENSG00000073584	17	0.889	0.0583
hsa_retrom10321	ENST00000398357	13	45964489	45965399	-	ENSP00000054950	ENSG00000049449	11	0.977	0.0171
hsa_retrop11338	ENST00000420177	13	46010307	46010785	+	ENSP00000419425	ENSG00000196262	7	0.825	0.1719
hsa_retrom10326	ENST00000428659	13	46127059	46127271	-	ENSP00000450638	ENSG00000100575	14	0.718	0.3415
hsairetrop10852	ENST00000447446	13	46246164	46246527	+	ENSMUSP00000034276	ENSMUSG00000031818	8	0.685	NA
hsa_retrom10330	ENST00000426552	13	46261684	46262607	-	ENSP00000285930	ENSG00000085662	7	0.785	0.3529
hsa_retrop11344	ENST00000510179	13	46844212	46844754	+	ENSP00000363753	ENSG00000119328	9	0.878	0.0604
hsa_retrom10336	ENST00000535073	13	47011521	47012123	-	ENSP00000328178	ENSG00000184203	3	0.825	0.1819
hsa_retrop11359	ENST00000423650	13	47079253	47079573	+	ENSP00000371138	ENSG00000088832	20	0.822	0.118
hsairetrop10889	NA	13	48337700	48338625	+	ENSMUSP00000126444	ENSMUSG00000058799	10	0.875	NA
hsa_retrom10344	ENST00000424277	13	48340811	48341231	-	ENSP00000346015	ENSG00000166441	11	0.759	0.265
hsa_retrop11375	ENST00000453033	13	49345264	49345962	+	ENSP00000216802	ENSG00000100911	14	0.887	0.062
hsa_retrop11395	ENST00000318353	13	50464727	50467135	+	ENSP00000280083	ENSG00000150527	14	0.876	0.1264
hsa_retrop11414	ENST00000425606	13	50673470	50674008	+	ENSP00000447001	ENSG00000063177	19	0.715	0.4643
hsa_retrop11419	ENST00000495613	13	50746225	50747319	+	ENSP00000216218	ENSG00000100380	22	0.954	0.0383
hsa_retrom10363	ENST00000445636	13	50935549	50935899	-	ENSP00000423316	ENSG00000109475	4	0.829	0.0303
hsairetrom10459	NA	13	51735859	51736475	-	ENSMUSP00000123474	ENSMUSG00000058558	5	0.808	NA
hsa_retrop11426	ENST00000427198	13	52034643	52035462	+	ENSP00000362744	ENSG00000198034	X	0.897	0.0993
hsa_retrom10372	ENST00000411777	13	52070162	52070387	-	ENSP00000272348	ENSG00000143977	2	0.72	0.1512
hsa_retrom10386	ENST00000454280	13	52482460	52484757	-	ENSP00000280083	ENSG00000150527	14	0.867	0.0983
hsa_retrop11429	ENST00000439042	13	52540878	52541282	+	ENSP00000297258	ENSG00000164687	8	0.956	0.0291
hsa_retrop11436	ENST00000521776	13	52602941	52605238	+	ENSP00000377944	ENSG00000156697	X	0.902	0.0746
hsa_retrop11442	ENST00000357495	13	53216628	53217206	+	ENSP00000447260	ENSG00000135486	12	0.974	0.0227
hsa_retrop11457	ENST00000377951	13	53394632	53395150	+	ENSP00000419425	ENSG00000196262	7	0.828	0.1602
hsa_retrom10397	ENST00000484130	13	55014842	55015450	-	ENSP00000375730	ENSG00000142541	19	0.975	0.0677
hsa_retrom10399	ENST00000430567	13	56573365	56574510	-	ENSP00000346339	ENSG00000164749	8	0.749	0.182
hsa_retrop11524	ENST00000435601	13	59102749	59104988	+	ENSP00000339286	ENSG00000150527	14	0.86	0.1309
hsa_retrom10403	ENST00000425106	13	59325183	59326117	-	ENSP00000369127	ENSG00000086061	9	0.734	0.469
hsa_retrop11527	ENST00000448913	13	60849097	60849717	+	ENSP00000313129	ENSG00000120948	1	0.847	0.1075
hsa_retrom10412	ENST00000448133	13	61211023	61212231	-	ENSP00000293831	ENSG00000161960	17	0.845	0.1421
hsa_retrop11528	ENST00000427086	13	62379414	62379738	+	ENSP00000385270	ENSG00000128340	22	0.655	17.8498
hsairetrom10531	ENST00000393023	13	64385139	64385740	-	ENSPPYP00000016140	ENSPPYG00000014429	3	0.855	NA
hsa_retrom10429	ENST00000441282	13	65532225	65533527	-	ENSP00000376911	ENSG00000100600	14	0.896	0.1422
hsa_retrom10433	ENST00000397973	13	65883934	65884614	-	ENSP00000431082	ENSG00000147465	8	0.895	0.1635
hsa_retrom10458	ENST00000433498	13	67840967	67841785	-	ENSP00000346067	ENSG00000168028	3	0.892	0.0919
hsa_retrom10462	ENST00000427761	13	68406011	68406878	-	ENSP00000296930	ENSG00000181163	5	0.844	0.1287
hsa_retrop11552	ENST00000424532	13	69228704	69229116	+	ENSP00000354739	ENSG00000197958	9	0.664	0.4717
hsa_retrop11559	ENST00000411421	13	69559190	69560199	+	ENSP00000371905	ENSG00000180776	13	0.932	0.064
hsa_retrom10469	ENST00000458195	13	70468218	70469370	-	ENSP00000445147	ENSG00000100764	14	0.708	0.183
hsa_retrop11581	ENST00000440551	13	72249199	72249603	+	ENSP00000355780	ENSG00000163041	1	0.956	0.0002
hsa_retrop11586	ENST00000422213	13	72278313	72278784	+	ENSP00000346027	ENSG00000122026	13	0.762	0.0861
hsa_retrom10470	ENST00000430654	13	72487871	72488314	-	ENSP00000347271	ENSG00000124614	6	0.675	0.3196
hsa_retrop11593	ENST00000433345	13	73277831	73278276	+	ENSP00000370574	ENSG00000122026	13	0.819	0.2274
hsa_retrop11596	ENST00000437000	13	73610539	73610945	+	ENSP00000354906	ENSG00000101843	X	0.904	0.0928
hsa_retrom10476	ENST00000420287	13	73674719	73675123	-	ENSP00000297258	ENSG00000164687	8	0.97	0.0189
hsa_retrom10483	ENST00000413857	13	74951733	74952088	-	ENSP00000370574	ENSG00000122026	13	0.697	0.2063
hsa_retrop11597	ENST00000418778	13	75402693	75404219	+	ENSP00000341874	ENSG00000101782	18	0.694	0.1875
hsa_retrom10489	ENST00000451540	13	75812163	75814476	-	ENSP00000280083	ENSG00000150527	14	0.842	0.1007
hsa_retrop11600	ENST00000426582	13	77502605	77502967	+	ENSP00000338516	ENSG00000145741	5	0.831	0.1095
hsa_retrom10500	ENST00000424827	13	77555318	77556003	-	ENSP00000339795	ENSG00000147604	8	0.904	0.1559
hsa_retrop11602	ENST00000436565	13	77559003	77562486	+	ENSP00000356520	ENSG00000135829	1	0.896	0.0972
hsa_retrop11610	ENST00000429803	13	78996994	78997230	+	ENSP00000408172	ENSG00000071082	2	0.692	0.3425
hsa_retrop11615	ENST00000418453	13	79335320	79335785	+	ENSP00000370569	ENSG00000122026	13	0.846	0.1212
hsa_retrop11625	ENST00000432974	13	79483059	79484679	+	ENSP00000280326	ENSG00000150753	5	0.852	0.117
hsa_retrop11629	ENST00000416374	13	79740356	79741024	+	ENSP00000358554	ENSG00000116752	1	0.755	0.1547
hsa_retrop11631	ENST00000439608	13	81462574	81462901	+	ENSP00000412701	ENSG00000004059	7	0.705	24.3366
hsa_retrop11634	ENST00000446367	13	81847084	81847302	+	ENSP00000319393	ENSG00000181061	3	0.781	0.2805
hsa_retrop11641	ENST00000426437	13	83397309	83398275	+	ENSP00000296048	ENSG00000163754	3	0.786	0.0877
hsairetrop11179	ENST00000446970	13	87871296	87871518	+	ENSMUSP00000122797	ENSMUSG00000090137	8	0.842	NA
hsa_retrom10515	ENST00000448725	13	88888877	88889224	-	ENSP00000418346	ENSG00000162244	3	0.619	0.6471
hsa_retrom10517	hsa_retrom10517	13	89630603	89631039	-	ENSP00000426331	ENSG00000164284	5	0.75	0.1345
hsa_retrom10522	ENST00000414049	13	90013412	90015526	-	ENSP00000406140	ENSG00000172845	2	0.847	0.0981
hsa_retrom10525	ENST00000448259	13	90485567	90486301	-	ENSP00000346063	ENSG00000146223	6	0.833	0.0729
hsa_retrop11650	ENST00000400284	13	90644099	90645146	+	ENSP00000225873	ENSG00000108733	17	0.853	0.0944
hsa_retrop11651	ENST00000427163	13	90823120	90824158	+	ENSP00000449349	ENSG00000064763	12	0.503	6.3467
hsa_retrop11655	ENST00000427733	13	90882921	90883933	+	ENSP00000373489	ENSG00000111057	12	0.855	0.1926
hsa_retrom10537	ENST00000420099	13	91924338	91924831	-	ENSP00000419425	ENSG00000196262	7	0.842	0.1137
hsa_retrom10542	ENST00000426409	13	94047552	94048071	-	ENSP00000447782	ENSG00000135486	12	0.686	0.2846
hsa_retrop11662	hsa_retrop11662	13	95263828	95264079	+	ENSP00000398290	ENSG00000170906	19	0.738	0.3596
hsa_retrom10549	ENST00000434403	13	95412822	95413205	-	ENSP00000370574	ENSG00000122026	13	0.78	0.1965
hsa_retrop11664	ENST00000415152	13	97225896	97226740	+	ENSP00000376726	ENSG00000144233	2	0.734	0.161
hsa_retrom10560	ENST00000426420	13	97535939	97538039	-	ENSP00000360609	ENSG00000096384	6	0.789	0.2262
hsa_retrop11679	ENST00000476869	13	98086725	98087039	+	ENSP00000437415	ENSG00000127314	12	0.731	12.2642
hsa_retrop11685	hsa_retrop11685	13	98128004	98128697	+	ENSP00000261479	ENSG00000100902	14	0.788	0.1687
hsa_retrop11687	ENST00000443410	13	98553906	98554428	+	ENSP00000361071	ENSG00000148303	9	0.681	0.5726
hsairetrom10770	ENST00000401550	13	99262546	99263139	-	ENSGALP00000023987	ENSGALG00000014899	3	0.702	NA
hsa_retrom10584	ENST00000430810	13	99293065	99293561	-	ENSP00000291295	ENSG00000160014	19	0.845	4.7608
hsa_retrom10586	ENST00000417594	13	99602011	99602674	-	ENSP00000418221	ENSG00000146223	6	0.843	0.1127
hsa_retrom10595	ENST00000394213	13	99867632	99867994	-	ENSP00000296417	ENSG00000164032	4	0.91	0.0561
hsairetrop11252	ENST00000428776	13	100024436	100024850	+	ENSGGOP00000022203	ENSGGOG00000027164	X	0.592	NA
hsa_retrom10623	ENST00000432924	13	100802738	100803349	-	ENSP00000309334	ENSG00000174748	3	0.897	0.0267
hsairetrom10852	hsairetrom10852	13	101276026	101276297	-	ENSMUSP00000132927	ENSMUSG00000061518	1	0.725	NA
hsa_retrom10638	ENST00000397387	13	101408811	101409310	-	ENSP00000306010	ENSG00000168374	3	0.747	0.1991
hsa_retrop11707	ENST00000400214	13	102454228	102454711	+	ENSP00000417027	ENSG00000029993	X	0.686	0.3774
hsa_retrop11719	ENST00000455851	13	105466731	105467417	+	ENSP00000339795	ENSG00000147604	8	0.803	0.183
hsa_retrop11724	ENST00000446059	13	107078121	107078390	+	ENSP00000259469	ENSG00000136942	9	0.8	0.2286
hsa_retrop11731	ENST00000452440	13	107315785	107316192	+	ENSP00000348205	ENSG00000159199	17	0.838	0.0795
hsa_retrom10659	ENST00000328558	13	107516167	107516634	-	ENSP00000419425	ENSG00000196262	7	0.787	0.2286
hsa_retrom10673	ENST00000411449	13	111415035	111415450	-	ENSP00000370574	ENSG00000122026	13	0.835	0.1207
hsa_retrop11744	ENST00000413631	13	111589106	111592135	+	ENSP00000355759	ENSG00000143799	1	0.885	0.1651
hsairetrom10939	ENST00000548856	14	19400492	19401665	-	ENSMMUP00000029758	ENSMMUG00000022603	14	0.891	NA
hsa_retrom10701	ENST00000546860	14	19421522	19422698	-	ENSP00000360371	ENSG00000157216	1	0.865	0.0976
hsa_retrop11765	ENST00000484916	14	19468568	19468855	+	ENSP00000346088	ENSG00000116251	1	0.879	0.096
hsa_retrom10703	ENST00000547616	14	19475220	19476455	-	ENSP00000355966	ENSG00000117650	1	0.891	0.0476
hsa_retrop11796	ENST00000409832	14	19584798	19585922	+	ENSP00000349960	ENSG00000075624	7	0.907	0.3875
hsa_retrom10710	ENST00000550526	14	19719546	19720465	-	ENSP00000410339	ENSG00000130204	19	0.938	0.083
hsa_retrop11806	ENST00000550868	14	19854942	19855861	+	ENSP00000252487	ENSG00000130204	19	0.935	0.0958
hsa_retrom10745	ENST00000551509	14	19987714	19988838	-	ENSP00000349960	ENSG00000075624	7	0.909	0.3957
hsa_retrop11809	ENST00000547023	14	20097282	20098517	+	ENSP00000355966	ENSG00000117650	1	0.901	0.0474
hsairetrop11404	ENST00000550646	14	20136988	20137804	+	ENSMMUP00000027602	ENSMMUG00000020976	1	0.912	NA
hsairetrop11411	ENST00000549782	14	20158015	20159188	+	ENSMMUP00000029758	ENSMMUG00000022603	14	0.899	NA
hsa_retrom10781	ENST00000554965	14	20376357	20376798	-	ENSP00000440307	ENSG00000069849	3	0.589	0.3466
hsa_retrom10838	ENST00000556014	14	20996413	20997059	-	ENSP00000361777	ENSG00000119335	9	0.817	0.1234
hsa_retrop12154	ENST00000553649	14	21630671	21631859	+	ENSP00000323967	ENSG00000073584	17	0.856	0.0815
hsa_retrop12160	ENST00000480068	14	21867084	21867401	+	ENSP00000396910	ENSG00000221983	19	0.81	0.4679
hsa_retrop12177	ENST00000398583	14	22031988	22033215	+	ENSP00000398242	ENSG00000162521	1	0.903	0.1101
hsa_retrom10917	ENST00000541653	14	22053416	22054222	-	ENSP00000443446	ENSG00000115091	2	0.729	0.1945
hsa_retrom10930	ENST00000545592	14	22080081	22080535	-	ENSP00000316176	ENSG00000177889	12	0.888	0.051
hsa_retrom10940	ENST00000545836	14	22117991	22118553	-	ENSP00000306788	ENSG00000170540	16	0.755	0.2132
hsa_retrop12213	ENST00000496596	14	22218553	22219604	+	ENSP00000412939	ENSG00000174444	15	0.847	0.131
hsa_retrom10964	ENST00000490836	14	23163310	23163744	-	ENSP00000293842	ENSG00000161970	17	0.807	0.26
hsa_retrop12392	ENST00000408907	14	23511435	23512334	+	ENSP00000355325	ENSG00000100804	14	0.527	61.3529
hsairetrop11949	ENST00000557705	14	24218626	24220356	+	ENSMMUP00000004172	ENSMMUG00000003119	20	0.752	NA
hsairetrom11226	hsairetrom11226	14	25736236	25736622	-	ENSGGOP00000000955	ENSGGOG00000000971	1	0.967	NA
hsairetrom11232	NA	14	25900402	25901440	-	ENSMMUP00000020139	ENSMMUG00000015359	5	0.733	NA
hsairetrop11982	ENST00000549779	14	26677242	26677633	+	ENSMMUP00000030675	ENSMMUG00000013607	18	0.735	NA
hsa_retrom11049	ENST00000556395	14	27727926	27728368	-	ENSP00000383981	ENSG00000143947	2	0.703	0.3359
hsa_retrop12475	ENST00000547295	14	28733760	28734319	+	ENSP00000357625	ENSG00000176171	10	0.989	0.0548
hsa_retrom11058	ENST00000547436	14	29142448	29142936	-	ENSP00000369965	ENSG00000145741	5	0.817	0.085
hsa_retrom11065	ENST00000557130	14	31152254	31152804	-	ENSP00000348838	ENSG00000175063	20	0.796	0.2707
hsa_retrop12479	ENST00000475149	14	31260306	31260692	+	ENSP00000354739	ENSG00000197958	9	0.767	0.274
hsa_retrop12480	ENST00000468034	14	31290641	31291046	+	ENSP00000253788	ENSG00000131469	17	0.853	0.1685
hsa_retrop12484	ENST00000554576	14	31433532	31433815	+	ENSP00000398064	ENSG00000181061	3	0.719	0.3107
hsa_retrom11066	ENST00000554662	14	31581221	31581445	-	ENSP00000434298	ENSG00000122026	13	0.811	0.119
hsa_retrop12487	hsa_retrop12487	14	31756908	31757571	+	ENSP00000407919	ENSG00000134440	18	0.704	0.2887
hsa_retrom11073	hsa_retrom11073	14	31789433	31789840	-	ENSP00000377033	ENSG00000159199	17	0.846	0.064
hsa_retrom11084	ENST00000484753	14	31932004	31932528	-	ENSP00000425250	ENSG00000163682	4	0.794	0.1565
hsa_retrom11086	ENST00000556746	14	32741064	32741507	-	ENSP00000296121	ENSG00000163807	3	0.986	0.006
hsa_retrop12501	ENST00000470966	14	34955266	34955631	+	ENSP00000389103	ENSG00000198242	17	0.846	0.1892
hsa_retrom11089	ENST00000480487	14	35037898	35038335	-	ENSP00000221975	ENSG00000105372	19	0.904	0.0861
hsa_retrop12505	ENST00000479812	14	35163480	35163839	+	ENSP00000389103	ENSG00000198242	17	0.842	0.1815
hsa_retrom11110	ENST00000495231	14	35209545	35210039	-	ENSP00000354739	ENSG00000197958	9	0.958	0.1172
hsa_retrop12508	ENST00000554337	14	35408531	35409538	+	ENSP00000363661	ENSG00000089289	X	0.855	0.0941
hsa_retrom11113	ENST00000483361	14	35613233	35613605	-	ENSP00000389103	ENSG00000198242	17	0.617	0.7422
hsa_retrom11129	ENST00000541658	14	35704383	35704820	-	ENSP00000361071	ENSG00000148303	9	0.89	0.1499
hsa_retrop12515	ENST00000475906	14	35731668	35732239	+	ENSP00000400467	ENSG00000163682	4	0.895	0.0993
hsa_retrom11141	ENST00000459899	14	35857471	35858275	-	ENSP00000339027	ENSG00000089157	12	0.844	0.1817
hsa_retrop12527	ENST00000555161	14	35937537	35938110	+	ENSP00000346050	ENSG00000145425	4	0.798	0.1616
hsa_retrom11147	ENST00000555540	14	35981031	35982289	-	ENSP00000447278	ENSG00000111057	12	0.774	0.2978
hsa_retrop12529	ENST00000552666	14	36235061	36236316	+	ENSP00000358042	ENSG00000130348	6	0.834	0.1473
hsa_retrop12530	ENST00000555918	14	36289044	36289425	+	ENSP00000219169	ENSG00000102898	16	0.937	0.0785
hsa_retrop12531	ENST00000553589	14	36840619	36841095	+	ENSP00000339250	ENSG00000187569	12	0.981	0.031
hsa_retrom11158	ENST00000486611	14	37046852	37047210	-	ENSP00000417048	ENSG00000162244	3	0.833	0.112
hsa_retrop12535	ENST00000361487	14	37132113	37132769	+	ENSP00000398652	ENSG00000075891	10	0.57	12.7768
hsa_retrop12553	ENST00000557533	14	39196482	39197678	+	ENSP00000447402	ENSG00000170421	12	0.828	0.3173
hsa_retrop12562	ENST00000556877	14	39577478	39577840	+	ENSP00000419425	ENSG00000196262	7	0.85	0.1287
hsa_retrop12567	ENST00000496515	14	39626349	39627058	+	ENSP00000361076	ENSG00000148303	9	0.815	0.18
hsairetrom11387	hsairetrom11387	14	39630868	39631163	-	ENSMUSP00000125754	ENSMUSG00000060743	1	0.727	NA
hsa_retrop12570	hsa_retrop12570	14	39680990	39681456	+	ENSP00000425144	ENSG00000167105	17	0.792	0.126
hsairetrom11403	ENST00000556081	14	42024867	42025229	-	ENSPTRP00000060835	ENSPTRG00000039804	7	0.661	NA
hsa_retrom11203	ENST00000553339	14	43276658	43277029	-	ENSP00000379278	ENSG00000164924	8	0.526	1.8276
hsa_retrom11208	ENST00000555080	14	44589416	44589964	-	ENSP00000228136	ENSG00000110696	11	0.923	0.0512
hsa_retrom11222	ENST00000557196	14	45356640	45356944	-	ENSP00000352928	ENSG00000130311	19	0.892	0.1228
hsa_retrop12616	ENST00000555084	14	45759239	45759586	+	ENSP00000372005	ENSG00000205981	3	0.983	0.028
hsa_retrom11235	ENST00000298283	14	47120298	47120939	-	ENSP00000358832	ENSG00000147403	X	0.953	0.5361
hsa_retrop12618	ENST00000556557	14	47465705	47466292	+	ENSP00000363021	ENSG00000117748	1	0.648	0.2908
hsa_retrom11238	ENST00000497800	14	47913313	47913697	-	ENSP00000318646	ENSG00000134419	16	0.715	0.3383
hsa_retrom11239	hsa_retrom11239	14	48788280	48788593	-	ENSP00000331849	ENSG00000183617	19	0.533	0.3986
hsa_retrop12624	ENST00000497218	14	48959086	48959379	+	ENSP00000407348	ENSG00000063177	19	0.735	0.4563
hsa_retrop12625	ENST00000554200	14	49840664	49841067	+	ENSP00000340315	ENSG00000135390	12	0.807	0.1775
hsa_retrom11245	ENST00000497398	14	50044113	50044512	-	ENSP00000380158	ENSG00000144713	3	0.756	0.2298
hsa_retrop12663	ENST00000555758	14	50066712	50067281	+	ENSP00000238738	ENSG00000119729	2	0.963	0.0163
hsa_retrom11253	ENST00000298289	14	50085505	50085879	-	ENSP00000404375	ENSG00000241343	X	0.896	1.0353
hsa_retrop12670	hsa_retrop12670	14	50143701	50144608	+	ENSP00000379964	ENSG00000115661	2	0.793	0.2068
hsa_retrop12685	ENST00000298316	14	50360449	50360979	+	ENSP00000256682	ENSG00000134287	12	0.684	91.7582
hsa_retrop12694	hsa_retrop12694	14	50517086	50518051	+	ENSP00000360305	ENSG00000107438	10	0.848	0.1612
hsa_retrop12695	ENST00000494283	14	50519962	50520278	+	ENSP00000318646	ENSG00000134419	16	0.692	0.2491
hsa_retrom11265	ENST00000553864	14	51038628	51038858	-	ENSP00000272348	ENSG00000143977	2	0.878	0.1606
hsa_retrop12704	ENST00000553886	14	51902813	51903465	+	ENSP00000361777	ENSG00000119335	9	0.849	0.121
hsa_retrop12718	ENST00000554418	14	52584349	52584713	+	ENSP00000317780	ENSG00000178741	15	0.844	0.0547
hsairetrop12280	hsairetrop12280	14	52754705	52755986	+	ENSMMUP00000003160	ENSMMUG00000002362	15	0.79	NA
hsa_retrom11285	ENST00000441945	14	54457821	54458713	-	ENSP00000349142	ENSG00000165629	10	0.872	0.1098
hsa_retrom11294	ENST00000415189	14	55471580	55472394	-	ENSP00000346067	ENSG00000168028	3	0.812	0.166
hsa_retrop12738	hsa_retrop12738	14	55695935	55696396	+	ENSP00000344259	ENSG00000185651	22	0.987	0.0286
hsa_retrom11296	hsa_retrom11296	14	55707343	55707784	-	ENSP00000317780	ENSG00000178741	15	0.878	0.0881
hsa_retrom11301	ENST00000488313	14	55749014	55749361	-	ENSP00000423983	ENSG00000109475	4	0.718	0.2297
hsa_retrop12739	ENST00000556017	14	55765404	55765937	+	ENSP00000217402	ENSG00000101421	20	0.902	0.0582
hsa_retrom11306	ENST00000247219	14	55880277	55880777	-	ENSP00000434298	ENSG00000122026	13	0.816	0.1154
hsa_retrop12744	ENST00000483820	14	56010204	56010890	+	ENSP00000361076	ENSG00000148303	9	0.804	0.2124
hsa_retrop12751	ENST00000487479	14	56232895	56233459	+	ENSP00000375730	ENSG00000142541	19	0.894	0.1759
hsa_retrom11314	ENST00000471982	14	57150127	57150480	-	ENSP00000404375	ENSG00000241343	X	0.821	0.1232
hsa_retrop12760	ENST00000467870	14	57445127	57446336	+	ENSP00000346001	ENSG00000100316	22	0.869	0.1361
hsa_retrop12769	ENST00000555466	14	58567703	58568284	+	ENSP00000354724	ENSG00000185619	4	0.736	0.8559
hsa_retrop12774	ENST00000491303	14	58607998	58608381	+	ENSP00000396910	ENSG00000221983	19	0.859	0.2097
hsa_retrop12790	ENST00000557424	14	58751491	58751996	+	ENSP00000343040	ENSG00000189403	13	0.833	0.1443
hsa_retrop12791	hsa_retrop12791	14	58930658	58930881	+	ENSP00000392896	ENSG00000230989	16	0.868	0.1053
hsa_retrop12805	ENST00000479477	14	59030845	59031334	+	ENSP00000425250	ENSG00000163682	4	0.77	0.1516
hsa_retrop12821	ENST00000480540	14	59261418	59261744	+	ENSP00000264258	ENSG00000071082	2	0.963	0.0464
hsa_retrom11329	hsa_retrom11329	14	59294400	59295073	-	ENSP00000378138	ENSG00000006042	17	0.92	0.08
hsa_retrom11332	ENST00000556311	14	59602207	59603139	-	ENSP00000285930	ENSG00000085662	7	0.759	0.3697
hsairetrop12421	ENST00000555184	14	59648302	59648656	+	ENSMMUP00000021879	ENSMMUG00000016638	3	0.75	NA
hsairetrop12426	ENST00000554676	14	60625750	60625968	+	ENSMMUP00000029422	ENSMMUG00000022351	5	0.808	NA
hsa_retrop12827	ENST00000555485	14	60646200	60646732	+	ENSP00000452056	ENSG00000100567	14	0.778	0.2443
hsa_retrom11340	ENST00000491913	14	60679182	60679633	-	ENSP00000389465	ENSG00000215472	18	0.796	0.1912
hsa_retrop12841	ENST00000555532	14	60864475	60864927	+	ENSP00000333001	ENSG00000131795	1	0.96	0.0059
hsa_retrom11343	ENST00000492636	14	61038772	61039017	-	ENSP00000274242	ENSG00000145592	5	0.768	0.1465
hsa_retrom11346	ENST00000489560	14	61068867	61069223	-	ENSP00000318646	ENSG00000134419	16	0.833	0.2306
hsa_retrop12844	ENST00000556153	14	61246699	61247310	+	ENSP00000296509	ENSG00000164109	4	0.975	0.0508
hsa_retrom11351	ENST00000553832	14	61385960	61386740	-	ENSP00000366156	ENSG00000116649	1	0.637	0.7448
hsairetrom11641	ENST00000555868	14	61746840	61747865	-	ENSMODP00000023071	ENSMODG00000018502	2	0.539	NA
hsa_retrom11361	ENST00000554239	14	62298632	62299087	-	ENSP00000253452	ENSG00000131143	16	0.75	0.155
hsa_retrom11362	hsa_retrom11362	14	62981602	62982067	-	ENSP00000359685	ENSG00000112245	6	0.55	0.3558
hsairetrop12494	ENST00000381654	14	64034686	64035027	+	ENSGGOP00000026272	ENSGGOG00000006432	2a	0.752	NA
hsa_retrom11367	hsa_retrom11367	14	64060752	64061992	-	ENSP00000248924	ENSG00000100116	22	0.874	0.1791
hsairetrop12501	ENST00000554777	14	64068317	64068529	+	ENSMODP00000015398	ENSMODG00000012295	4	0.887	NA
hsa_retrop12862	hsa_retrop12862	14	64275264	64275428	+	ENSP00000397872	ENSG00000233927	19	0.6	0.4781
hsa_retrop12913	ENST00000394709	14	65007568	65009484	+	ENSP00000227378	ENSG00000109971	11	0.862	16.8694
hsa_retrom11388	ENST00000557463	14	65733359	65733703	-	ENSP00000370569	ENSG00000122026	13	0.878	0.0551
hsa_retrop12921	ENST00000484315	14	65735523	65735810	+	ENSP00000386655	ENSG00000257529	X	0.773	1.8148
hsairetrop12545	ENST00000554374	14	65745940	65746696	+	ENSMMUP00000021611	ENSMMUG00000016450	19	0.87	NA
hsa_retrom11391	ENST00000555940	14	65995613	65995897	-	ENSP00000368912	ENSG00000173674	X	0.71	0.4738
hsa_retrom11397	ENST00000557194	14	66367653	66368114	-	ENSP00000273550	ENSG00000167996	11	0.779	0.1397
hsa_retrom11399	ENST00000445822	14	66479551	66480507	-	ENSP00000361626	ENSG00000065978	1	0.963	0.0284
hsa_retrop12928	ENST00000556832	14	67227250	67227733	+	ENSP00000260443	ENSG00000137876	15	0.877	0.1687
hsa_retrop12951	ENST00000559968	14	68082201	68082716	+	ENSP00000384678	ENSG00000189403	13	0.827	0.1553
hsairetrop12567	ENST00000557141	14	68265709	68266263	+	ENSGGOP00000028459	ENSGGOG00000015046	10	0.924	NA
hsa_retrom11410	ENST00000473054	14	68805497	68806162	-	ENSP00000361076	ENSG00000148303	9	0.87	0.1369
hsa_retrom11424	ENST00000557078	14	68888408	68888913	-	ENSP00000419425	ENSG00000196262	7	0.904	0.0656
hsairetrop12579	ENST00000493832	14	69159792	69160237	+	ENSMMUP00000000568	ENSMMUG00000000422	15	0.745	NA
hsa_retrop12954	hsa_retrop12954	14	69328479	69328778	+	ENSP00000437512	ENSG00000111196	12	0.886	0.1046
hsa_retrom11436	ENST00000555136	14	69354505	69354804	-	ENSP00000370125	ENSG00000205581	21	0.89	0.0649
hsa_retrop12961	ENST00000556558	14	69550115	69552103	+	ENSP00000263239	ENSG00000088205	2	0.891	0.1159
hsa_retrom11439	ENST00000467051	14	70027867	70028187	-	ENSP00000419179	ENSG00000114391	3	0.72	0.1614
hsa_retrom11442	ENST00000447432	14	70352060	70352773	-	ENSP00000361076	ENSG00000148303	9	0.979	0.035
hsa_retrop12964	hsa_retrop12964	14	70701212	70701809	+	ENSP00000340429	ENSG00000205307	7	0.915	0.0751
hsairetrop12616	ENST00000557241	14	71061519	71062542	+	ENSPPYP00000005204	ENSPPYG00000004563	12	0.821	NA
hsa_retrom11454	ENST00000554427	14	71797056	71797475	-	ENSP00000239666	ENSG00000120509	X	0.921	0.0347
hsairetrom11818	ENST00000488095	14	73396356	73396638	-	ENSGGOP00000014989	ENSGGOG00000015365	19	0.894	NA
hsa_retrop12990	ENST00000557330	14	74098179	74098723	+	ENSP00000299166	ENSG00000166136	10	0.728	0.2313
hsa_retrop13001	ENST00000555526	14	74659291	74659527	+	ENSP00000405965	ENSG00000188612	17	0.817	0.1694
hsa_retrom11466	ENST00000554490	14	74844429	74845121	-	ENSP00000341885	ENSG00000140988	16	0.909	0.2097
hsa_retrop13038	ENST00000554629	14	74949722	74950208	+	ENSP00000358723	ENSG00000116473	1	0.892	0.1418
hsa_retrop13050	ENST00000555980	14	75340387	75340954	+	ENSP00000386703	ENSG00000138382	2	0.838	0.1847
hsairetrom11859	NA	14	76062160	76062546	-	ENSGALP00000007763	ENSGALG00000004871	6	0.899	NA
hsa_retrom11493	ENST00000464073	14	77101121	77101968	-	ENSP00000346067	ENSG00000168028	3	0.936	0.0563
hsa_retrom11514	ENST00000463521	14	78149548	78149916	-	ENSP00000370574	ENSG00000122026	13	0.816	0.1586
hsairetrom11909	ENST00000555153	14	78526281	78526619	-	ENSOANP00000020947	ENSOANG00000013265	X5	0.788	NA
hsairetrop12711	hsairetrop12711	14	81288800	81289165	+	ENSGGOP00000000955	ENSGGOG00000000971	1	0.911	NA
hsa_retrom11522	hsa_retrom11522	14	81467657	81468142	-	ENSP00000397798	ENSG00000215472	18	0.779	0.2447
hsa_retrop13096	ENST00000554095	14	81498873	81499641	+	ENSP00000366410	ENSG00000173614	1	0.824	0.1917
hsairetrop12725	ENST00000380761	14	81712632	81712952	+	ENSGGOP00000008597	ENSGGOG00000008793	12	0.88	NA
hsa_retrom11529	hsa_retrom11529	14	81725984	81726577	-	ENSP00000440568	ENSG00000076248	12	0.746	0.2956
hsairetrom11939	NA	14	81799341	81799705	-	ENSMMUP00000007295	ENSMMUG00000030562	9	0.855	NA
hsairetrom11945	ENST00000554807	14	81879260	81879589	-	ENSGGOP00000008597	ENSGGOG00000008793	12	0.872	NA
hsa_retrop13111	ENST00000553854	14	82127952	82129213	+	ENSP00000339053	ENSG00000156508	6	0.742	0.206
hsa_retrop13117	ENST00000554099	14	82382653	82384229	+	ENSP00000416892	ENSG00000100129	22	0.863	0.1111
hsa_retrom11548	ENST00000554405	14	83159049	83159399	-	ENSP00000271690	ENSG00000143420	1	0.991	0.035
hsa_retrop13125	hsa_retrop13125	14	88418871	88421538	+	ENSP00000298786	ENSG00000122376	10	0.904	0.0624
hsa_retrom11561	ENST00000557743	14	89756532	89757938	-	ENSP00000229922	ENSG00000112186	6	0.722	0.3122
hsa_retrom11570	ENST00000557601	14	90204161	90204643	-	ENSP00000436945	ENSG00000110172	11	0.912	0.1433
hsa_retrom11576	ENST00000461458	14	90833044	90833523	-	ENSP00000351021	ENSG00000122026	13	0.956	0.0066
hsa_retrop13145	ENST00000393407	14	91232875	91233267	+	ENSP00000393241	ENSG00000231500	6	0.878	0.0166
hsa_retrop13151	ENST00000557756	14	91885799	91886092	+	ENSP00000418348	ENSG00000187118	3	0.857	0.1008
hsa_retrom11587	hsa_retrom11587	14	92069348	92069777	-	ENSP00000422164	ENSG00000113356	5	0.966	0.0509
hsa_retrom11594	ENST00000554450	14	92070749	92071663	-	ENSP00000229307	ENSG00000111704	12	0.908	0.064
hsairetrop12809	ENST00000553543	14	93604443	93604809	+	ENSPPYP00000010369	ENSPPYG00000009240	18	0.862	NA
hsa_retrom11599	ENST00000469219	14	93689947	93690485	-	ENSP00000222247	ENSG00000105640	19	0.894	0.3938
hsa_retrop13159	ENST00000492041	14	93710385	93710666	+	ENSP00000446503	ENSG00000241343	X	0.719	0.2364
hsa_retrop13176	ENST00000554199	14	95100072	95100862	+	ENSP00000395469	ENSG00000159346	1	0.83	0.1753
hsa_retrop13182	ENST00000488229	14	95192625	95193509	+	ENSP00000346067	ENSG00000168028	3	0.949	0.0613
hsa_retrom11632	ENST00000490252	14	95267191	95267800	-	ENSP00000388529	ENSG00000174748	3	0.882	0.0621
hsa_retrom11639	ENST00000554856	14	96890034	96890547	-	ENSP00000414975	ENSG00000089220	12	0.833	0.2844
hsa_retrom11642	ENST00000489946	14	96922916	96923303	-	ENSP00000389103	ENSG00000198242	17	0.646	0.4955
hsa_retrop13224	hsa_retrop13224	14	100430866	100431712	+	ENSP00000022615	ENSG00000078668	8	0.905	0.1159
hsa_retrom11655	ENST00000486273	14	100440701	100441348	-	ENSP00000433034	ENSG00000140988	16	0.652	0.687
hsairetrop12909	ENST00000556820	14	100947287	100947610	+	ENSPTRP00000053956	ENSPTRG00000031426	21	0.796	NA
hsa_retrop13243	ENST00000472981	14	102144280	102144714	+	ENSP00000293842	ENSG00000161970	17	0.938	0.0161
hsairetrom12107	ENST00000553295	14	102309732	102310459	-	ENSMODP00000031200	ENSMODG00000006503	1	0.625	NA
hsa_retrom11674	ENST00000556294	14	102435702	102435938	-	ENSP00000339720	ENSG00000189043	7	0.722	0.218
hsa_retrom11694	ENST00000475260	14	103128561	103128920	-	ENSP00000389103	ENSG00000198242	17	0.877	0.1446
hsa_retrop13261	ENST00000488133	14	103507822	103508391	+	ENSP00000307889	ENSG00000167526	16	0.78	0.341
hsa_retrop13263	ENST00000560510	14	103606018	103606401	+	ENSP00000184266	ENSG00000065518	3	0.578	0.3606
hsa_retrop13268	ENST00000559810	14	103614934	103615304	+	ENSP00000370569	ENSG00000122026	13	0.847	0.0873
hsairetrop12966	ENST00000560971	14	103650729	103651004	+	ENSOANP00000017565	ENSOANG00000011089	Ultra380	0.793	NA
hsa_retrop13274	ENST00000488305	14	103707829	103708306	+	ENSP00000370574	ENSG00000122026	13	0.838	0.0925
hsa_retrop13277	ENST00000494237	14	103749301	103749750	+	ENSP00000389465	ENSG00000215472	18	0.821	0.2506
hsa_retrom11708	ENST00000560051	14	103830627	103831157	-	ENSP00000410354	ENSG00000029993	X	0.833	0.1965
hsa_retrom11714	ENST00000485258	14	103840379	103841217	-	ENSP00000346067	ENSG00000168028	3	0.893	0.0976
hsa_retrom11715	ENST00000490023	14	103878475	103879098	-	ENSP00000363018	ENSG00000198755	6	0.834	0.1945
hsa_retrom11726	ENST00000491637	14	105302334	105303053	-	ENSP00000341885	ENSG00000140988	16	0.954	0.1516
hsa_retrom11742	hsa_retrom11742	14	106251851	106252168	-	ENSP00000363162	ENSG00000136888	9	0.684	0.3672
hsa_retrom11765	ENST00000392301	14	106444610	106445233	-	ENSP00000379888	ENSG00000142937	1	0.894	0.0818
hsa_retrom13797	hsa_retrom13797	15	20832125	20833956	-	ENSP00000430397	ENSG00000145860	5	0.93	0.0356
hsa_retrom13802	ENST00000556364	15	21009042	21010092	-	ENSP00000284878	ENSG00000154639	21	0.946	0.0607
hsa_retrom13826	ENST00000556425	15	21936566	21938126	-	ENSP00000314067	ENSG00000180370	3	0.945	0.0714
hsa_retrom13828	ENST00000556905	15	22015705	22016755	-	ENSP00000284878	ENSG00000154639	21	0.943	0.0596
hsa_retrom13850	ENST00000460876	15	22440223	22440846	-	ENSP00000379888	ENSG00000142937	1	0.899	0.071
hsa_retrom13941	ENST00000558695	15	22691019	22692818	-	ENSP00000355637	ENSG00000135776	1	0.902	0.083
hsa_retrom13961	ENST00000558708	15	23499529	23501360	-	ENSP00000430397	ENSG00000145860	5	0.935	0.0355
hsa_retrop13389	ENST00000314520	15	23811008	23812450	+	ENSP00000255977	ENSG00000133606	7	0.52	1.0484
hsa_retrom13972	ENST00000441797	15	25154079	25154972	-	ENSP00000359345	ENSG00000122406	1	0.919	0.0423
hsa_retrom13987	ENST00000557200	15	26173296	26173723	-	ENSP00000295491	ENSG00000163319	4	0.833	0.0784
hsa_retrop13398	hsa_retrop13398	15	27210124	27210629	+	ENSP00000305654	ENSG00000171928	17	0.778	0.2995
hsa_retrom13990	ENST00000438334	15	27453236	27453782	-	ENSP00000226004	ENSG00000108861	17	0.773	0.5476
hsa_retrop13403	ENST00000454085	15	28140852	28141725	+	ENSP00000359345	ENSG00000122406	1	0.834	0.1892
hsa_retrop13407	hsa_retrop13407	15	28648379	28650177	+	ENSP00000355637	ENSG00000135776	1	0.91	0.0867
hsa_retrom13995	hsa_retrom13995	15	28751773	28753571	-	ENSP00000355637	ENSG00000135776	1	0.907	0.0845
hsairetrop13277	hsairetrop13277	15	30022843	30023223	+	ENSGGOP00000000955	ENSGGOG00000000971	1	1	NA
hsa_retrop13418	hsa_retrop13418	15	30336926	30337495	+	ENSP00000225777	ENSG00000108639	17	0.953	0.092
hsa_retrop13425	hsa_retrop13425	15	30515308	30517371	+	ENSP00000251287	ENSG00000099822	19	0.926	0.2381
hsa_retrop13435	ENST00000561405	15	31712331	31712849	+	ENSP00000348838	ENSG00000175063	20	0.829	0.267
hsairetrom13132	hsairetrom13132	15	32605722	32607353	-	ENSMODP00000008053	ENSMODG00000006487	3	0.921	NA
hsa_retrom14034	ENST00000561418	15	33129185	33129527	-	ENSP00000268607	ENSG00000140941	16	0.696	0.2437
hsairetrop13344	ENST00000559135	15	33304337	33304711	+	ENSOANP00000021620	ENSOANG00000013708	Contig30988	0.827	NA
hsa_retrom14043	ENST00000487972	15	34378112	34378515	-	ENSP00000380158	ENSG00000144713	3	0.77	0.2041
hsa_retrom14068	hsa_retrom14068	15	34665785	34666803	-	ENSP00000349960	ENSG00000075624	7	0.762	0.5243
hsa_retrom14078	hsa_retrom14078	15	34781206	34782698	-	ENSP00000221419	ENSG00000104824	19	0.952	0.0426
hsa_retrop13466	hsa_retrop13466	15	34786621	34788098	+	ENSP00000371798	ENSG00000075618	7	0.927	0.1855
hsairetrom13203	ENST00000559655	15	35141336	35142593	-	ENSMODP00000029535	ENSMODG00000023336	3	0.656	NA
hsa_retrop13476	ENST00000491307	15	35235251	35235610	+	ENSP00000404375	ENSG00000241343	X	0.948	0.039
hsa_retrom14107	ENST00000528386	15	35376397	35377311	-	ENSP00000229307	ENSG00000111704	12	0.99	0.0113
hsa_retrop13483	ENST00000558778	15	35384682	35385230	+	ENSP00000291552	ENSG00000160201	21	0.892	0.0979
hsa_retrom14111	hsa_retrom14111	15	35413625	35414285	-	ENSP00000302114	ENSG00000169230	5	0.905	0.1076
hsa_retrop13488	ENST00000560832	15	35529527	35530006	+	ENSP00000453838	ENSG00000140350	15	0.906	0.0275
hsa_retrop13489	ENST00000560892	15	35574797	35575168	+	ENSP00000219169	ENSG00000102898	16	0.888	0.2016
hsa_retrom14115	ENST00000558517	15	35590451	35591641	-	ENSP00000388638	ENSG00000134453	10	0.88	0.1255
hsa_retrop13491	ENST00000560893	15	35692939	35693418	+	ENSP00000447782	ENSG00000135486	12	0.815	0.1287
hsairetrop13421	hsairetrop13421	15	36905673	36906314	+	ENSMODP00000021533	ENSMODG00000017253	2	0.903	NA
hsa_retrop13517	hsa_retrop13517	15	36909290	36911467	+	ENSP00000381490	ENSG00000161813	12	0.887	0.0988
hsa_retrom14120	hsa_retrom14120	15	36918878	36919867	-	ENSP00000385192	ENSG00000128294	22	0.699	0.6622
hsa_retrom14133	hsa_retrom14133	15	37109405	37110312	-	ENSP00000385776	ENSG00000113712	5	0.838	0.0901
hsa_retrop13518	ENST00000476363	15	37782892	37783295	+	ENSP00000233609	ENSG00000115268	19	0.853	0.7291
hsa_retrom14144	ENST00000559695	15	38751007	38751656	-	ENSP00000381148	ENSG00000175215	12	0.825	0.285
hsa_retrom14169	ENST00000471253	15	40604694	40605490	-	ENSP00000339027	ENSG00000089157	12	0.862	0.1331
hsa_retrom14179	ENST00000489027	15	40772951	40773514	-	ENSP00000400467	ENSG00000163682	4	0.865	0.0839
hsa_retrom14183	hsa_retrom14183	15	40824275	40824617	-	ENSP00000376836	ENSG00000198015	12	0.778	0.2221
hsa_retrop13539	hsa_retrop13539	15	41052806	41053096	+	ENSP00000405965	ENSG00000188612	17	0.761	0.2083
hsa_retrom14185	ENST00000220507	15	41165349	41165702	-	ENSP00000385270	ENSG00000128340	22	0.544	86.2457
hsa_retrom14188	hsa_retrom14188	15	41240688	41241190	-	ENSP00000409332	ENSG00000135070	9	0.768	0.1427
hsa_retrop13569	hsa_retrop13569	15	42864125	42864628	+	ENSP00000383039	ENSG00000118680	18	0.901	0.0897
hsa_retrom14210	hsa_retrom14210	15	43093164	43094646	-	ENSP00000449404	ENSG00000170421	12	0.857	0.2385
hsa_retrom14213	ENST00000534629	15	43231512	43232580	-	ENSP00000349078	ENSG00000160752	1	0.809	0.133
hsa_retrom14225	ENST00000487100	15	43407900	43408691	-	ENSP00000346050	ENSG00000145425	4	0.943	0.0224
hsa_retrop13572	hsa_retrop13572	15	43423304	43423882	+	ENSP00000263672	ENSG00000118363	11	0.933	0.0597
hsa_retrom14230	hsa_retrom14230	15	43432351	43433453	-	ENSP00000357340	ENSG00000160752	1	0.818	0.114
hsa_retrom14232	hsa_retrom14232	15	43560105	43560586	-	ENSP00000301587	ENSG00000167863	17	0.888	0.1229
hsairetrom13373	ENST00000451079	15	44168050	44168472	-	ENSPPYP00000022907	ENSPPYG00000020460	X	0.949	NA
hsa_retrom14277	ENST00000418351	15	44281262	44282382	-	ENSP00000349960	ENSG00000075624	7	0.827	0.3387
hsa_retrop13589	ENST00000423136	15	44355709	44356511	+	ENSP00000380070	ENSG00000111640	12	0.761	0.3355
hsa_retrop13591	ENST00000508195	15	44646897	44647647	+	ENSP00000380068	ENSG00000111640	12	0.714	0.4932
hsa_retrom14280	ENST00000560685	15	44740227	44741542	-	ENSP00000442876	ENSG00000099783	19	0.687	0.2874
hsa_retrop13603	ENST00000561335	15	45212160	45213016	+	ENSP00000419371	ENSG00000163512	3	0.741	0.1686
hsa_retrom14287	ENST00000559765	15	45262233	45263362	-	ENSP00000419371	ENSG00000163512	3	0.722	0.2089
hsa_retrop13639	hsa_retrop13639	15	45344975	45345679	+	ENSP00000379287	ENSG00000164924	8	0.868	0.0496
hsairetrop13575	ENST00000559063	15	45507793	45508141	+	ENSMMUP00000028664	ENSMMUG00000021766	16	0.882	NA
hsairetrop13582	ENST00000313559	15	45847660	45848166	+	ENSGGOP00000000955	ENSGGOG00000000971	1	0.844	NA
hsa_retrop13647	ENST00000560476	15	47119710	47120155	+	ENSP00000308430	ENSG00000103018	16	0.7	0.2665
hsa_retrom14295	ENST00000497325	15	48022341	48023041	-	ENSP00000361076	ENSG00000148303	9	0.962	0.0814
hsairetrop13605	NA	15	49017548	49018025	+	ENSMUSP00000096743	ENSMUSG00000074628	2	0.526	NA
hsa_retrop13674	ENST00000560290	15	49264228	49265341	+	ENSP00000447566	ENSG00000170421	12	0.841	0.4523
hsa_retrop13683	ENST00000559425	15	49448562	49449044	+	ENSP00000358272	ENSG00000123545	6	0.863	0.1194
hsa_retrom14299	ENST00000560630	15	49470591	49470937	-	ENSP00000387925	ENSG00000174748	3	0.767	0.2751
hsa_retrom14302	ENST00000560489	15	49657322	49658881	-	ENSP00000261854	ENSG00000138600	15	0.9	0.0672
hsa_retrop13689	ENST00000560847	15	50709580	50710887	+	ENSP00000217426	ENSG00000101444	20	0.803	0.446
hsa_retrop13697	ENST00000495139	15	50758936	50759293	+	ENSP00000009589	ENSG00000008988	8	0.824	0.1866
hsa_retrop13702	ENST00000561147	15	51236801	51238193	+	ENSP00000297579	ENSG00000164934	8	0.869	0.0882
hsa_retrom14313	ENST00000560291	15	52151384	52152850	-	ENSP00000261708	ENSG00000108651	17	0.847	0.1316
hsa_retrop13707	ENST00000486386	15	52387492	52387969	+	ENSP00000435777	ENSG00000110700	11	0.901	0.1318
hsa_retrop13713	ENST00000443885	15	52797386	52798057	+	ENSP00000236957	ENSG00000114942	2	0.933	0.071
hsa_retrop13720	ENST00000477347	15	53177792	53178667	+	ENSP00000346067	ENSG00000168028	3	0.892	0.1058
hsa_retrom14322	ENST00000559385	15	53229372	53230715	-	ENSP00000339063	ENSG00000156508	6	0.863	0.0857
hsa_retrom14329	ENST00000561168	15	54129491	54129757	-	ENSP00000330343	ENSG00000184900	21	0.575	2.7866
hsa_retrom14334	hsa_retrom14334	15	54340376	54342173	-	ENSP00000420646	ENSG00000068885	3	0.8	0.1823
hsa_retrom14340	ENST00000560782	15	54613315	54613846	-	ENSP00000447782	ENSG00000135486	12	0.769	0.2067
hsa_retrom14345	hsa_retrom14345	15	55734833	55735555	-	ENSP00000357804	ENSG00000159445	1	0.929	0.0569
hsa_retrom14358	ENST00000559681	15	56297911	56299383	-	ENSP00000424896	ENSG00000138767	4	0.909	0.0701
hsa_retrom14367	hsa_retrom14367	15	56484551	56485401	-	ENSP00000312288	ENSG00000138796	4	0.742	0.262
hsairetrop13684	hsairetrop13684	15	56615311	56615804	+	ENSMODP00000007109	ENSMODG00000005735	X	0.594	NA
hsa_retrop13726	ENST00000325778	15	57138511	57138801	+	ENSP00000367453	ENSG00000176244	10	0.75	0.1543
hsa_retrom14370	hsa_retrom14370	15	57539618	57540159	-	ENSP00000447782	ENSG00000135486	12	0.775	2.8999
hsa_retrop13729	hsa_retrop13729	15	57780760	57781181	+	ENSP00000428596	ENSG00000132541	8	0.733	0.3578
hsa_retrom14373	ENST00000485045	15	57848113	57848577	-	ENSP00000435777	ENSG00000110700	11	0.856	0.1858
hsa_retrom14383	ENST00000558410	15	58271974	58272811	-	ENSP00000263097	ENSG00000064666	19	0.803	0.5327
hsa_retrop13735	ENST00000486795	15	58492805	58493119	+	ENSP00000453319	ENSG00000108107	19	0.679	0.8557
hsa_retrop13743	hsa_retrop13743	15	58964497	58964983	+	ENSP00000382417	ENSG00000189403	13	0.738	0.3752
hsa_retrop13757	ENST00000465295	15	59161858	59162333	+	ENSP00000370569	ENSG00000122026	13	0.881	0.0397
hsa_retrom14388	ENST00000467293	15	59341598	59341924	-	ENSP00000370574	ENSG00000122026	13	0.728	0.3021
hsa_retrop13786	ENST00000307144	15	59499140	59500282	+	ENSP00000379516	ENSG00000166800	11	0.822	0.3182
hsa_retrom14390	ENST00000560515	15	59693422	59694203	-	ENSP00000296802	ENSG00000164346	5	0.897	0.0973
hsa_retrom14391	ENST00000557949	15	59699857	59700269	-	ENSP00000416638	ENSG00000148303	9	0.804	0.2775
hsa_retrom14396	ENST00000463506	15	59817673	59818080	-	ENSP00000370569	ENSG00000122026	13	0.702	0.2136
hsa_retrom14401	ENST00000472975	15	59844814	59845292	-	ENSP00000351021	ENSG00000122026	13	0.894	0.049
hsa_retrop13810	ENST00000558833	15	59968956	59969517	+	ENSP00000216452	ENSG00000100564	14	0.968	0.0448
hsa_retrop13823	ENST00000398981	15	60060551	60061342	+	ENSP00000346050	ENSG00000145425	4	0.992	0.0121
hsa_retrom14404	ENST00000558620	15	60163711	60165238	-	ENSP00000263239	ENSG00000088205	2	0.867	0.1334
hsa_retrop13826	ENST00000559657	15	60257642	60258281	+	ENSP00000366410	ENSG00000173614	1	0.795	0.2277
hsa_retrom14414	ENST00000559787	15	60345406	60346264	-	ENSP00000396504	ENSG00000106484	7	0.818	0.1724
hsa_retrop13832	ENST00000475062	15	60682537	60682878	+	ENSP00000404375	ENSG00000241343	X	0.709	0.1939
hsa_retrop13836	ENST00000477729	15	60696662	60697117	+	ENSP00000347271	ENSG00000124614	6	0.895	0.0679
hsa_retrop13851	hsa_retrop13851	15	61966975	61967282	+	ENSP00000349722	ENSG00000109332	4	0.575	0.3944
hsairetrom13592	NA	15	62374647	62375513	-	ENSGGOP00000007063	ENSGGOG00000007220	5	0.736	NA
hsa_retrom14423	ENST00000558737	15	62654264	62654530	-	ENSP00000370125	ENSG00000205581	21	0.933	0.1569
hsa_retrop13854	ENST00000560358	15	63245372	63246312	+	ENSP00000361626	ENSG00000065978	1	0.857	0.0478
hsa_retrom14431	ENST00000507324	15	64820869	64821830	-	ENSP00000380068	ENSG00000111640	12	0.866	0.1864
hsa_retrom14436	ENST00000492168	15	64923311	64923720	-	ENSP00000370569	ENSG00000122026	13	0.842	0.0941
hsa_retrop13861	hsa_retrop13861	15	65318428	65319011	+	ENSP00000306887	ENSG00000171202	11	0.731	0.1219
hsa_retrom14442	hsa_retrom14442	15	66063513	66064479	-	ENSP00000404381	ENSG00000164031	4	0.939	0.0295
hsa_retrom14451	ENST00000489563	15	66671678	66672253	-	ENSP00000346022	ENSG00000163682	4	0.917	0.0591
hsairetrop13867	NA	15	67524784	67525128	+	ENSMMUP00000007295	ENSMMUG00000030562	9	0.838	NA
hsa_retrop13890	ENST00000560974	15	69126145	69127085	+	ENSP00000377914	ENSG00000005194	16	0.854	0.1058
hsa_retrop13896	ENST00000558160	15	69314569	69316476	+	ENSP00000237612	ENSG00000118777	4	0.705	0.2368
hsa_retrom14478	ENST00000470368	15	71089079	71089438	-	ENSP00000294189	ENSG00000162244	3	0.833	0.1464
hsa_retrop13909	ENST00000558927	15	71150989	71152356	+	ENSP00000449404	ENSG00000170421	12	0.856	0.2282
hsa_retrom14483	ENST00000493817	15	71355582	71356330	-	ENSP00000359345	ENSG00000122406	1	0.892	0.0851
hsa_retrom14492	hsa_retrom14492	15	71457250	71457755	-	ENSP00000384678	ENSG00000189403	13	0.964	0.0327
hsa_retrom14495	ENST00000401798	15	71633500	71634051	-	ENSP00000389465	ENSG00000215472	18	0.984	0.0177
hsa_retrom14504	hsa_retrom14504	15	72333542	72334021	-	ENSP00000295822	ENSG00000163577	3	0.788	0.0903
hsa_retrop13914	ENST00000478757	15	72426982	72427393	+	ENSP00000370574	ENSG00000122026	13	0.813	0.0718
hsa_retrom14509	ENST00000477007	15	72671559	72672051	-	ENSP00000354739	ENSG00000197958	9	0.976	0.1116
hsa_retrop13925	hsa_retrop13925	15	72742999	72743767	+	ENSP00000300408	ENSG00000167085	17	0.741	0.2003
hsa_retrom14517	ENST00000560329	15	73191741	73192601	-	ENSP00000428755	ENSG00000181163	5	0.837	0.1223
hsa_retrom14523	ENST00000560953	15	73435611	73435859	-	ENSP00000409863	ENSG00000088832	20	0.651	0.2395
hsa_retrop13956	hsa_retrop13956	15	74653931	74654395	+	ENSP00000419425	ENSG00000196262	7	0.907	0.0889
hsa_retrop13958	hsa_retrop13958	15	75406602	75407210	+	ENSP00000247020	ENSG00000132581	17	0.739	0.2184
hsa_retrom14534	ENST00000497944	15	75478995	75479345	-	ENSP00000404375	ENSG00000241343	X	0.847	0.949
hsairetrom13792	hsairetrom13792	15	75544085	75544841	-	ENSMMUP00000027538	ENSMMUG00000020928	13	0.838	NA
hsa_retrom14543	hsa_retrom14543	15	75614373	75614850	-	ENSP00000453838	ENSG00000140350	15	0.781	4.4214
hsa_retrom14544	hsa_retrom14544	15	75805143	75805383	-	ENSP00000266735	ENSG00000139343	12	0.709	0.1076
hsa_retrop13977	hsa_retrop13977	15	76039110	76039598	+	ENSP00000419425	ENSG00000196262	7	0.921	0.1395
hsa_retrom14576	ENST00000560090	15	77271629	77272855	-	ENSP00000449404	ENSG00000170421	12	0.829	0.2503
hsairetrop14014	hsairetrop14014	15	77570748	77571113	+	ENSGGOP00000000955	ENSGGOG00000000971	1	0.856	NA
hsa_retrop13980	ENST00000558606	15	78674921	78675460	+	ENSP00000420357	ENSG00000111832	6	0.802	0.1893
hsa_retrom14594	ENST00000494933	15	78953386	78953950	-	ENSP00000447001	ENSG00000063177	19	0.817	0.2962
hsa_retrom14599	ENST00000482506	15	79155592	79156071	-	ENSP00000370574	ENSG00000122026	13	0.925	0.0659
hsa_retrop13991	ENST00000560385	15	79528674	79529315	+	ENSP00000452021	ENSG00000092199	14	0.874	0.0924
hsa_retrom14601	hsa_retrom14601	15	79852166	79852809	-	ENSP00000386145	ENSG00000198176	13	0.921	0.087
hsa_retrom14605	hsa_retrom14605	15	79960687	79961415	-	ENSP00000346063	ENSG00000146223	6	0.882	0.0997
hsa_retrom14606	ENST00000493002	15	80044038	80044391	-	ENSP00000230050	ENSG00000112306	6	0.786	0.3033
hsa_retrop13999	ENST00000557880	15	80236819	80237919	+	ENSP00000349078	ENSG00000160752	1	0.84	0.1561
hsa_retrom14617	ENST00000559213	15	81410256	81410681	-	ENSP00000453838	ENSG00000140350	15	0.732	4.4736
hsairetrom13946	ENST00000558741	15	82302556	82302900	-	ENSOANP00000023178	ENSOANG00000014709	Ultra369	0.8	NA
hsa_retrom14628	ENST00000393394	15	82664517	82665092	-	ENSP00000346022	ENSG00000163682	4	1	0.005
hsa_retrom14637	ENST00000467036	15	83041058	83041633	-	ENSP00000400467	ENSG00000163682	4	1	0.005
hsa_retrom14644	ENST00000558391	15	83395062	83396177	-	ENSP00000331514	ENSG00000184009	17	0.681	0.896
hsa_retrop14013	ENST00000559181	15	83713120	83713520	+	ENSP00000297258	ENSG00000164687	8	0.919	0.0497
hsa_retrom14655	hsa_retrom14655	15	85483858	85484363	-	ENSP00000384678	ENSG00000189403	13	0.728	0.2982
hsa_retrom14658	ENST00000560500	15	85724851	85725314	-	ENSP00000386449	ENSG00000155438	2	0.813	0.175
hsa_retrop14050	ENST00000559487	15	85958458	85958862	+	ENSP00000297258	ENSG00000164687	8	0.933	0.046
hsa_retrop14060	ENST00000561341	15	89503349	89504272	+	ENSP00000373487	ENSG00000111057	12	0.73	0.2013
hsa_retrom14673	hsa_retrom14673	15	89532753	89533474	-	ENSP00000354947	ENSG00000198898	7	0.88	0.0528
hsa_retrom14678	ENST00000352732	15	89744352	89745033	-	ENSP00000382880	ENSG00000101558	18	0.902	0.0831
hsa_retrom14685	ENST00000460165	15	90231151	90231449	-	ENSP00000446503	ENSG00000241343	X	0.863	0.0901
hsa_retrop14070	ENST00000492017	15	90749802	90750196	+	ENSP00000230050	ENSG00000112306	6	0.886	0.1204
hsa_retrop14076	ENST00000411845	15	90818361	90818948	+	ENSP00000397157	ENSG00000112378	6	0.842	0.2496
hsa_retrom14691	hsa_retrom14691	15	90828351	90828791	-	ENSP00000386449	ENSG00000155438	2	0.858	0.2143
hsa_retrom14697	ENST00000412799	15	90892079	90892429	-	ENSP00000444186	ENSG00000139112	12	0.932	0.0985
hsa_retrop14167	ENST00000560814	15	90929045	90929287	+	ENSP00000398290	ENSG00000170906	19	0.631	0.4707
hsairetrop14230	ENST00000559254	15	91178050	91178262	+	ENSMODP00000015398	ENSMODG00000012295	4	0.93	NA
hsa_retrop14183	ENST00000553858	15	92824713	92825316	+	ENSP00000452398	ENSG00000258873	19	0.809	0.1407
hsa_retrop14188	ENST00000557228	15	92829058	92829907	+	ENSP00000377408	ENSG00000181163	5	0.865	0.07
hsa_retrop14190	ENST00000555268	15	93170312	93170642	+	ENSP00000424183	ENSG00000109270	4	0.664	0.4619
hsairetrop14262	ENST00000522935	15	93255038	93255337	+	ENSPTRP00000053956	ENSPTRG00000031426	21	0.98	NA
hsa_retrop14201	ENST00000484702	15	93262638	93262902	+	ENSP00000408172	ENSG00000071082	2	0.648	0.2596
hsa_retrom14708	ENST00000554246	15	93277087	93277407	-	ENSP00000308405	ENSG00000105968	7	0.915	0.0205
hsa_retrop14205	ENST00000557146	15	93338877	93339786	+	ENSP00000369852	ENSG00000102048	X	0.813	0.0569
hsa_retrom14718	ENST00000505622	15	96984799	96985543	-	ENSP00000359991	ENSG00000171314	10	0.862	0.1515
hsairetrop14292	ENST00000465747	15	96991384	96991709	+	ENSGALP00000027030	ENSGALG00000016775	1	0.783	NA
hsa_retrop14215	ENST00000533428	15	97300235	97301823	+	ENSP00000242505	ENSG00000138286	10	0.889	0.052
hsa_retrop14224	ENST00000559111	15	99798817	99800071	+	ENSP00000413047	ENSG00000166598	12	0.895	0.0777
hsa_retrom14726	ENST00000559372	15	99825238	99825762	-	ENSP00000447782	ENSG00000135486	12	0.869	0.1073
hsa_retrom14732	ENST00000471472	15	100091586	100092275	-	ENSP00000339795	ENSG00000147604	8	0.797	0.1944
hsa_retrom14738	ENST00000561423	15	101093737	101094489	-	ENSP00000262848	ENSG00000183943	X	0.838	0.2065
hsa_retrom14742	ENST00000561269	15	101185638	101186860	-	ENSP00000261015	ENSG00000138442	2	0.802	0.1707
hsa_retrop14314	ENST00000544386	16	436853	437230	+	ENSP00000389103	ENSG00000198242	17	0.825	0.1255
hsa_retrom14797	ENST00000468708	16	2382317	2382733	-	ENSP00000251453	ENSG00000105193	19	0.899	0.1405
hsa_retrom14803	hsa_retrom14803	16	2872658	2872969	-	ENSP00000419449	ENSG00000173812	17	0.808	0.2833
hsa_retrom14807	hsa_retrom14807	16	2972662	2973008	-	ENSP00000389103	ENSG00000198242	17	0.795	0.1399
hsa_retrom14826	hsa_retrom14826	16	3373189	3373925	-	ENSP00000418221	ENSG00000146223	6	0.862	0.0539
hsa_retrop14545	ENST00000459875	16	3546201	3546768	+	ENSP00000447001	ENSG00000063177	19	0.836	0.2941
hsa_retrop14546	hsa_retrop14546	16	3890567	3891011	+	ENSP00000339250	ENSG00000187569	12	0.597	0.1275
hsa_retrop14551	hsa_retrop14551	16	4180591	4180821	+	ENSP00000348116	ENSG00000155368	2	0.675	0.1938
hsa_retrom14847	hsa_retrom14847	16	4612815	4613123	-	ENSP00000422806	ENSG00000113387	5	0.893	0.1062
hsairetrom14393	NA	16	5310732	5311045	-	ENSPTRP00000042761	ENSPTRG00000002666	10	0.681	NA
hsa_retrop14568	ENST00000470389	16	5320235	5320952	+	ENSP00000346050	ENSG00000145425	4	0.824	0.1096
hsa_retrom14904	ENST00000403916	16	9250262	9250738	-	ENSP00000370569	ENSG00000122026	13	0.994	0.0176
hsa_retrop14586	hsa_retrop14586	16	10205236	10206737	+	ENSP00000265385	ENSG00000106348	7	0.833	0.2469
hsa_retrop14590	ENST00000425129	16	11120881	11121618	+	ENSP00000346063	ENSG00000146223	6	0.935	0.029
hsa_retrop14621	hsa_retrop14621	16	11336539	11337260	+	ENSP00000415799	ENSG00000092199	14	0.853	0.0986
hsa_retrom14922	hsa_retrom14922	16	12062362	12062553	-	ENSP00000351492	ENSG00000198258	19	0.574	0.5594
hsa_retrop14640	hsa_retrop14640	16	14294214	14294827	+	ENSP00000413355	ENSG00000175106	17	0.913	0.0467
hsa_retrom14945	ENST00000482912	16	16025560	16026153	-	ENSP00000390193	ENSG00000174748	3	0.828	0.074
hsa_retrom14949	ENST00000400791	16	16187950	16188364	-	ENSP00000397798	ENSG00000215472	18	0.761	0.2602
hsa_retrop14664	ENST00000497299	16	18026576	18027133	+	ENSP00000379730	ENSG00000147604	8	0.93	0.0182
hsa_retrom14961	hsa_retrom14961	16	20250294	20250569	-	ENSP00000400591	ENSG00000182004	1	0.891	0.0577
hsa_retrop14677	hsa_retrop14677	16	23511965	23512913	+	ENSP00000295414	ENSG00000163249	2	0.572	0.4143
hsairetrom14584	hsairetrom14584	16	26043826	26044212	-	ENSGGOP00000000955	ENSGGOG00000000971	1	0.989	NA
hsairetrom14594	hsairetrom14594	16	27144807	27145594	-	ENSMODP00000030006	ENSMODG00000018533	2	0.833	NA
hsa_retrom15048	ENST00000513369	16	28251013	28251988	-	ENSP00000380070	ENSG00000111640	12	0.864	0.2244
hsa_retrom15054	ENST00000469929	16	28825304	28825633	-	ENSP00000318646	ENSG00000134419	16	0.858	0.221
hsa_retrom15058	hsa_retrom15058	16	29396718	29397147	-	ENSP00000445593	ENSG00000183426	16	0.683	0.275
hsa_retrom15083	hsa_retrom15083	16	30238232	30238661	-	ENSP00000445593	ENSG00000183426	16	0.683	0.275
hsa_retrom15096	ENST00000418751	16	30455600	30456973	-	ENSP00000442768	ENSG00000086475	10	0.823	53.8412
hsa_retrom15135	hsa_retrom15135	16	30832393	30832835	-	ENSP00000382580	ENSG00000101220	20	0.78	0.3502
hsa_retrop14731	hsa_retrop14731	16	31185894	31186142	+	ENSP00000418438	ENSG00000170906	19	0.759	0.3961
hsa_retrop14735	hsa_retrop14735	16	31692164	31693083	+	ENSP00000199814	ENSG00000086589	5	0.679	0.2484
hsa_retrom15161	hsa_retrom15161	16	31708729	31708994	-	ENSP00000330343	ENSG00000184900	21	0.646	4.3353
hsa_retrop14752	hsa_retrop14752	16	31817177	31818020	+	ENSP00000384493	ENSG00000104695	8	0.879	0.0859
hsa_retrom15165	hsa_retrom15165	16	31882200	31882426	-	ENSP00000330343	ENSG00000184900	21	0.595	72.5643
hsa_retrom15175	hsa_retrom15175	16	32390392	32391762	-	ENSP00000263238	ENSG00000115091	2	0.71	8.0088
hsairetrom14769	NA	16	32450459	32451887	-	ENSMODP00000007717	ENSMODG00000006222	3	0.642	NA
hsa_retrom15334	hsa_retrom15334	16	34404065	34404613	-	ENSP00000253023	ENSG00000130725	19	0.94	0.0702
hsa_retrom15337	hsa_retrom15337	16	34455954	34456420	-	ENSP00000418483	ENSG00000106538	7	0.662	0.3476
hsairetrom14860	hsairetrom14860	16	34489568	34490034	-	ENSPPYP00000020372	ENSPPYG00000018166	7	0.634	NA
hsa_retrom15343	hsa_retrom15343	16	34648650	34649119	-	ENSP00000418483	ENSG00000106538	7	0.646	0.5305
hsa_retrom15347	hsa_retrom15347	16	34777657	34778016	-	ENSP00000223271	ENSG00000106538	7	0.661	0.3007
hsa_retrop15109	hsa_retrop15109	16	46605445	46606045	+	ENSP00000304565	ENSG00000168461	18	0.743	0.1896
hsa_retrom15365	hsa_retrom15365	16	46660319	46660894	-	ENSP00000376982	ENSG00000172780	3	0.995	0
hsa_retrom15374	ENST00000492447	16	47184046	47184414	-	ENSP00000389103	ENSG00000198242	17	0.662	0.5807
hsa_retrop15112	hsa_retrop15112	16	47296748	47297411	+	ENSP00000355325	ENSG00000100804	14	0.734	0.1441
hsairetrom14900	NA	16	47632567	47632908	-	ENSPTRP00000047122	ENSPTRG00000019637	7	0.965	NA
hsa_retrom15389	ENST00000498379	16	48368385	48368765	-	ENSP00000396910	ENSG00000221983	19	0.773	0.2127
hsa_retrop15119	hsa_retrop15119	16	48530654	48532514	+	ENSP00000344794	ENSG00000124615	6	0.865	0.1348
hsa_retrom15397	ENST00000478038	16	48611438	48612147	-	ENSP00000341885	ENSG00000140988	16	0.828	0.4187
hsa_retrop15122	hsa_retrop15122	16	48634094	48634560	+	ENSP00000260443	ENSG00000137876	15	0.884	0.1393
hsa_retrop15125	hsa_retrop15125	16	48751994	48752994	+	ENSP00000417303	ENSG00000102349	X	0.785	0.0967
hsa_retrom15417	hsa_retrom15417	16	50092375	50093142	-	ENSP00000414839	ENSG00000075624	7	0.708	1.1497
hsa_retrop15131	hsa_retrop15131	16	51141485	51141931	+	ENSP00000270142	ENSG00000142168	21	0.662	0.1634
hsa_retrop15135	hsa_retrop15135	16	51311783	51312620	+	ENSP00000242576	ENSG00000076248	12	0.67	0.6048
hsa_retrop15140	hsa_retrop15140	16	51679729	51680295	+	ENSP00000447260	ENSG00000135486	12	0.995	0.0196
hsa_retrop15168	ENST00000540332	16	52689219	52689959	+	ENSP00000357521	ENSG00000143549	1	0.96	0.0364
hsa_retrop15174	hsa_retrop15174	16	52968765	52969272	+	ENSP00000407828	ENSG00000167085	17	0.876	0.1048
hsa_retrom15428	hsa_retrom15428	16	53044297	53045199	-	ENSP00000303222	ENSG00000109919	11	0.674	0.2772
hsa_retrop15180	hsa_retrop15180	16	53332600	53333671	+	ENSP00000427528	ENSG00000071539	5	0.771	0.361
hsa_retrop15181	ENST00000457326	16	55600669	55601412	+	ENSP00000246533	ENSG00000126247	19	0.672	5.4222
hsairetrop15098	NA	16	56940446	56940865	+	ENSMMUP00000007295	ENSMMUG00000030562	9	0.822	NA
hsa_retrop15205	hsa_retrop15205	16	57637056	57637553	+	ENSP00000410354	ENSG00000029993	X	0.774	0.2636
hsa_retrop15206	hsa_retrop15206	16	57747765	57748162	+	ENSP00000432756	ENSG00000109919	11	0.649	0.1978
hsa_retrom15435	hsa_retrom15435	16	58125958	58126851	-	ENSP00000261881	ENSG00000075131	15	0.823	0.1513
hsa_retrom15441	hsa_retrom15441	16	58631496	58631849	-	ENSP00000361349	ENSG00000133678	10	0.649	0.3165
hsa_retrop15211	ENST00000470623	16	58859801	58860269	+	ENSP00000354739	ENSG00000197958	9	0.715	0.4381
hsa_retrom15443	hsa_retrom15443	16	59788368	59788930	-	ENSP00000368528	ENSG00000184831	X	0.834	0.0348
hsa_retrom15445	hsa_retrom15445	16	60688380	60689877	-	ENSP00000411640	ENSG00000116906	1	0.635	0.2175
hsa_retrom15452	hsa_retrom15452	16	63214514	63214975	-	ENSP00000386680	ENSG00000184182	2	0.804	0.211
hsa_retrom15454	ENST00000487776	16	63384667	63385053	-	ENSP00000318646	ENSG00000134419	16	0.723	0.2838
hsa_retrop15228	hsa_retrop15228	16	64770772	64771184	+	ENSP00000419425	ENSG00000196262	7	0.703	0.2614
hsa_retrom15456	hsa_retrom15456	16	66484901	66485244	-	ENSP00000394224	ENSG00000205423	16	0.746	0.4006
hsa_retrop15251	ENST00000465542	16	68243365	68243684	+	ENSP00000230050	ENSG00000112306	6	0.795	0.2178
hsa_retrom15476	hsa_retrom15476	16	68684942	68685843	-	ENSP00000263097	ENSG00000064666	19	0.847	0.4376
hsairetrop15203	hsairetrop15203	16	68720282	68720586	+	ENSMUSP00000074724	ENSMUSG00000073676	1	0.922	NA
hsa_retrop15271	hsa_retrop15271	16	68856487	68857035	+	ENSP00000446314	ENSG00000087086	19	0.674	0.3739
hsa_retrop15275	ENST00000490535	16	69067721	69068424	+	ENSP00000341885	ENSG00000140988	16	0.734	0.6576
hsa_retrom15494	hsa_retrom15494	16	69790441	69791840	-	ENSP00000362963	ENSG00000147140	X	0.934	0.0223
hsa_retrom15497	ENST00000472115	16	70113074	70113527	-	ENSP00000347271	ENSG00000124614	6	0.797	0.2336
hsa_retrom15536	hsa_retrom15536	16	72038968	72040529	-	ENSP00000282050	ENSG00000152234	18	0.87	0.0818
hsa_retrop15293	hsa_retrop15293	16	72312167	72312467	+	ENSP00000380702	ENSG00000214114	1	0.883	0.065
hsa_retrop15296	hsa_retrop15296	16	72762514	72763798	+	ENSP00000373489	ENSG00000111057	12	0.855	0.1466
hsa_retrom15543	ENST00000484897	16	73974539	73975423	-	ENSP00000346067	ENSG00000168028	3	0.915	0.0671
hsa_retrop15311	hsa_retrop15311	16	74254826	74255317	+	ENSP00000419425	ENSG00000196262	7	0.824	0.1411
hsa_retrop15314	ENST00000485799	16	74586149	74586602	+	ENSP00000347271	ENSG00000124614	6	0.797	0.2327
hsairetrom15182	hsairetrom15182	16	74646494	74646775	-	ENSMUSP00000074724	ENSMUSG00000073676	1	0.894	NA
hsa_retrop15316	hsa_retrop15316	16	74701404	74702601	+	ENSP00000450627	ENSG00000120802	12	0.836	0.11
hsa_retrom15549	ENST00000474978	16	75226370	75227145	-	ENSP00000250784	ENSG00000129824	Y	0.812	0.1
hsa_retrom15565	hsa_retrom15565	16	75743027	75743713	-	ENSP00000358737	ENSG00000116459	1	0.768	0.1163
hsa_retrom15569	ENST00000478088	16	76268956	76269521	-	ENSP00000447001	ENSG00000063177	19	0.872	0.2112
hsa_retrop15463	hsa_retrop15463	16	77926321	77926809	+	ENSP00000419425	ENSG00000196262	7	0.842	0.1887
hsa_retrom15588	hsa_retrom15588	16	78082383	78083803	-	ENSP00000449404	ENSG00000170421	12	0.83	0.2628
hsa_retrop15465	hsa_retrop15465	16	78389426	78389728	+	ENSP00000302160	ENSG00000170860	3	0.853	0.0816
hsa_retrop15474	ENST00000488662	16	78859178	78859900	+	ENSP00000433821	ENSG00000149273	11	0.765	0.1984
hsa_retrom15607	hsa_retrom15607	16	81509631	81510124	-	ENSP00000419425	ENSG00000196262	7	0.873	0.1758
hsa_retrom15613	ENST00000328945	16	82032719	82033834	-	ENSP00000330812	ENSG00000183921	16	0.609	12.7328
hsa_retrom15630	ENST00000484096	16	85849482	85850142	-	ENSP00000363018	ENSG00000198755	6	0.869	0.155
hsa_retrom15634	hsa_retrom15634	16	86468450	86469104	-	ENSP00000379229	ENSG00000213719	6	0.74	0.2515
hsa_retrop15483	ENST00000473913	16	86559154	86559801	+	ENSP00000361076	ENSG00000148303	9	0.894	0.1552
hsairetrop15481	hsairetrop15481	16	90237450	90238204	+	ENSGGOP00000020986	ENSGGOG00000027998	3	0.553	NA
hsa_retrom15661	ENST00000479057	17	560043	560808	-	ENSP00000362744	ENSG00000198034	X	0.862	0.1297
hsa_retrom15671	ENST00000451056	17	1761336	1761740	-	ENSP00000390558	ENSG00000143252	1	0.985	0.008
hsa_retrom15674	hsa_retrom15674	17	2030722	2031519	-	ENSP00000368468	ENSG00000050393	6	0.779	0.1054
hsa_retrop15796	hsa_retrop15796	17	2210057	2210635	+	ENSP00000447260	ENSG00000135486	12	0.886	0.0626
hsa_retrom15682	hsa_retrom15682	17	2490218	2491161	-	ENSP00000293831	ENSG00000161960	17	0.861	0.2321
hsa_retrop15879	ENST00000486753	17	3568514	3568993	+	ENSP00000370569	ENSG00000122026	13	0.95	0.0375
hsa_retrop15885	hsa_retrop15885	17	4125533	4127093	+	ENSP00000399527	ENSG00000163785	3	0.878	0.0583
hsa_retrop15889	hsa_retrop15889	17	4204732	4205990	+	ENSP00000264266	ENSG00000118855	3	0.815	0.2008
hsa_retrop15890	hsa_retrop15890	17	4475501	4475814	+	ENSP00000363641	ENSG00000136810	9	0.867	0.0468
hsa_retrom15814	ENST00000466297	17	4608114	4608509	-	ENSP00000230050	ENSG00000112306	6	0.947	0.1077
hsa_retrom15818	ENST00000394174	17	4760247	4760666	-	ENSP00000329757	ENSG00000185883	16	0.752	0.5418
hsa_retrop15898	hsa_retrop15898	17	5633639	5634332	+	ENSP00000216121	ENSG00000184117	22	0.712	0.5232
hsa_retrom15984	hsa_retrom15984	17	6225735	6226022	-	ENSP00000436712	ENSG00000134717	1	0.633	12.8215
hsa_retrop15903	ENST00000492507	17	6653170	6653523	+	ENSP00000389103	ENSG00000198242	17	0.812	0.1377
hsa_retrop15908	ENST00000483947	17	7044282	7044908	+	ENSP00000361076	ENSG00000148303	9	0.649	0.4433
hsa_retrop15948	hsa_retrop15948	17	8463794	8464280	+	ENSP00000419425	ENSG00000196262	7	0.787	0.4803
hsairetrom15578	ENST00000466869	17	9493402	9493799	-	ENSGALP00000002527	ENSGALG00000001658	27	0.778	NA
hsa_retrop15958	ENST00000475545	17	10162079	10162546	+	ENSP00000385659	ENSG00000143947	2	0.891	0.1079
hsa_retrom16030	hsa_retrom16030	17	10619429	10619698	-	ENSP00000437462	ENSG00000111196	12	0.91	4.7538
hsa_retrom16093	ENST00000460347	17	11914060	11914541	-	ENSP00000346027	ENSG00000122026	13	0.806	0.078
hsa_retrop15966	hsa_retrop15966	17	12018864	12019202	+	ENSP00000356056	ENSG00000146425	6	0.903	0.0675
hsa_retrom16095	ENST00000412454	17	14608459	14608851	-	ENSP00000393241	ENSG00000231500	6	0.947	0.0629
hsa_retrop15972	ENST00000424673	17	15346953	15347502	+	ENSP00000346022	ENSG00000163682	4	0.833	0.1012
hsa_retrop15987	ENST00000452091	17	15410180	15410664	+	ENSP00000419425	ENSG00000196262	7	0.819	0.1621
hsa_retrom16105	ENST00000450587	17	15607609	15608214	-	ENSP00000264552	ENSG00000108106	19	0.975	0.0261
hsa_retrop16032	hsa_retrop16032	17	15689932	15691006	+	ENSP00000388667	ENSG00000105419	19	0.95	0.0869
hsa_retrop16037	ENST00000453217	17	15987390	15987671	+	ENSP00000346088	ENSG00000116251	1	0.717	0.4243
hsa_retrop16041	ENST00000422309	17	16757249	16757620	+	ENSP00000262428	ENSG00000103187	16	0.655	0.2942
hsairetrop15867	ENST00000423783	17	17145334	17146202	+	ENSGGOP00000013697	ENSGGOG00000014043	5	0.788	NA
hsa_retrom16120	ENST00000392730	17	17286694	17287326	-	ENSP00000307889	ENSG00000167526	16	0.981	0.0501
hsa_retrop16055	ENST00000418183	17	18215339	18215969	+	ENSP00000361076	ENSG00000148303	9	0.662	0.3865
hsairetrop15900	ENST00000439258	17	18216459	18216844	+	ENSGALP00000029462	ENSGALG00000017100	1	0.696	NA
hsairetrop15910	NA	17	18365145	18366283	+	ENSOANP00000024889	ENSOANG00000015785	1	0.898	NA
hsa_retrop16069	ENST00000536115	17	18476066	18476230	+	ENSP00000397872	ENSG00000233927	19	0.982	0.0366
hsa_retrop16077	ENST00000447794	17	18553530	18554852	+	ENSP00000302768	ENSG00000172239	5	0.984	0.0131
hsa_retrop16087	ENST00000434303	17	18811592	18812175	+	ENSP00000384925	ENSG00000099901	22	0.878	0.1365
hsairetrop15954	ENST00000395604	17	19283922	19284473	+	ENSMODP00000030253	ENSMODG00000017722	3	0.543	NA
hsa_retrom16139	ENST00000439860	17	19349286	19350006	-	ENSP00000341885	ENSG00000140988	16	0.992	0.0318
hsa_retrop16108	ENST00000422360	17	19400256	19400839	+	ENSP00000352143	ENSG00000215472	18	0.849	0.0726
hsa_retrop16113	ENST00000418418	17	19743439	19743825	+	ENSP00000184266	ENSG00000065518	3	0.767	0.1006
hsa_retrop16115	ENST00000434406	17	19959600	19959943	+	ENSP00000361923	ENSG00000172586	10	0.712	0.3173
hsa_retrop16116	ENST00000430462	17	20015137	20016300	+	ENSP00000221200	ENSG00000104756	8	0.91	0.0701
hsa_retrom16149	ENST00000436471	17	20384645	20387327	-	ENSP00000336712	ENSG00000083312	5	0.906	0.0715
hsa_retrop16122	ENST00000455360	17	20467849	20468199	+	ENSP00000262428	ENSG00000103187	16	0.657	0.3233
hsa_retrop16159	ENST00000418141	17	20492606	20493679	+	ENSP00000388667	ENSG00000105419	19	0.941	0.0652
hsa_retrop16161	ENST00000452760	17	20515937	20517318	+	ENSP00000268676	ENSG00000140995	16	0.905	0.1543
hsa_retrop16165	ENST00000455244	17	20687958	20689037	+	ENSP00000359380	ENSG00000099194	10	0.939	0.0397
hsairetrom15792	hsairetrom15792	17	20805278	20806028	-	ENSGGOP00000028596	ENSGGOG00000034822	2a	0.885	NA
hsa_retrop16192	ENST00000482905	17	21407884	21408288	+	ENSP00000370574	ENSG00000122026	13	0.963	0.0081
hsa_retrop16203	hsa_retrop16203	17	22203800	22204849	+	ENSP00000299613	ENSG00000166483	11	0.645	0.4084
hsa_retrom16163	hsa_retrom16163	17	25409719	25411034	-	ENSP00000322439	ENSG00000178952	16	0.876	0.1349
hsa_retrop16209	ENST00000419419	17	25601159	25601491	+	ENSP00000378160	ENSG00000109475	4	0.856	0.0479
hsa_retrop16210	ENST00000479473	17	25607508	25607935	+	ENSP00000251453	ENSG00000105193	19	0.69	0.2896
hsa_retrom16165	hsa_retrom16165	17	25678887	25679580	-	ENSP00000388336	ENSG00000008282	7	0.702	0.3311
hsa_retrom16178	hsa_retrom16178	17	26603079	26604132	-	ENSP00000373489	ENSG00000111057	12	0.859	0.1742
hsa_retrom16187	hsa_retrom16187	17	26772335	26772583	-	ENSP00000445138	ENSG00000127314	12	0.759	4.6721
hsa_retrop16218	ENST00000465875	17	26794840	26795421	+	ENSP00000385018	ENSG00000171863	2	0.985	0.0111
hsa_retrop16219	ENST00000494679	17	26982658	26982999	+	ENSP00000230050	ENSG00000112306	6	0.73	0.3066
hsairetrop16158	ENST00000469001	17	27129468	27129810	+	ENSPPYP00000023499	ENSPPYG00000025870	2a	0.748	NA
hsa_retrom16203	hsa_retrom16203	17	27530444	27531561	-	ENSP00000321058	ENSG00000151239	12	0.989	0.0068
hsa_retrom16215	ENST00000493028	17	28043326	28043703	-	ENSP00000351021	ENSG00000122026	13	0.787	0.2093
hsa_retrop16233	ENST00000478775	17	28182777	28183347	+	ENSP00000400467	ENSG00000163682	4	0.719	0.3281
hsa_retrop16236	hsa_retrop16236	17	28299605	28299961	+	ENSP00000405925	ENSG00000103202	16	0.714	0.6555
hsa_retrop16243	hsa_retrop16243	17	28395650	28396649	+	ENSP00000305810	ENSG00000168818	4	0.943	0.072
hsa_retrop16256	hsa_retrop16256	17	28951429	28952510	+	ENSP00000269886	ENSG00000141985	19	0.855	0.3153
hsa_retrop16261	ENST00000490847	17	29157939	29158341	+	ENSP00000346046	ENSG00000182774	15	0.892	0.1987
hsa_retrop16269	hsa_retrop16269	17	29672537	29673205	+	ENSP00000445912	ENSG00000162433	1	1	0.0085
hsa_retrop16279	hsa_retrop16279	17	30367549	30368541	+	ENSP00000269886	ENSG00000141985	19	0.849	0.3284
hsa_retrom16226	hsa_retrom16226	17	30438580	30439609	-	ENSP00000376139	ENSG00000141580	17	0.933	0.0806
hsa_retrom16228	hsa_retrom16228	17	30554909	30555127	-	ENSP00000351492	ENSG00000198258	19	0.959	0.063
hsa_retrom16229	hsa_retrom16229	17	30670793	30671143	-	ENSP00000381960	ENSG00000214788	11	0.833	0.1059
hsa_retrom16230	hsa_retrom16230	17	30761958	30762371	-	ENSP00000258662	ENSG00000136159	13	0.833	0.1597
hsa_retrom16240	ENST00000530992	17	32364712	32366891	-	ENSP00000275780	ENSG00000146872	17	0.977	0.0137
hsa_retrop16285	ENST00000415412	17	33332279	33332698	+	ENSP00000354676	ENSG00000198856	4	0.885	0.1614
hsa_retrop16288	hsa_retrop16288	17	33517980	33518627	+	ENSP00000448580	ENSG00000166211	12	0.894	0.1114
hsa_retrop16295	hsa_retrop16295	17	33671331	33671578	+	ENSP00000273480	ENSG00000114125	3	0.714	0.3457
hsa_retrom16252	hsa_retrom16252	17	33704432	33704697	-	ENSP00000239878	ENSG00000120686	13	0.865	0.0957
hsa_retrom16254	hsa_retrom16254	17	33733964	33734845	-	ENSP00000425048	ENSG00000169570	5	0.843	0.1219
hsa_retrom16256	hsa_retrom16256	17	33736703	33737166	-	ENSP00000243662	ENSG00000123892	11	0.611	0.5071
hsa_retrop16297	hsa_retrop16297	17	33817128	33818257	+	ENSP00000262904	ENSG00000112242	6	0.849	0.1039
hsa_retrop16299	hsa_retrop16299	17	33825235	33826200	+	ENSP00000355635	ENSG00000135801	1	0.865	0.1072
hsa_retrom16270	ENST00000540082	17	33841814	33842205	-	ENSP00000355566	ENSG00000173726	1	0.778	0.1998
hsa_retrom16271	hsa_retrom16271	17	33923637	33924105	-	ENSP00000253047	ENSG00000130748	19	0.826	0.2783
hsa_retrop16307	ENST00000474264	17	34046926	34047341	+	ENSP00000389465	ENSG00000215472	18	0.707	0.5878
hsa_retrom16272	hsa_retrom16272	17	34188097	34188570	-	ENSP00000260443	ENSG00000137876	15	0.924	0.1123
hsa_retrom16282	ENST00000414616	17	34930301	34931020	-	ENSP00000341885	ENSG00000140988	16	0.879	0.2657
hsa_retrom16286	ENST00000494994	17	35497536	35498239	-	ENSP00000341885	ENSG00000140988	16	0.833	0.3003
hsa_retrom16297	ENST00000452924	17	35500672	35501215	-	ENSP00000382417	ENSG00000189403	13	0.896	0.1396
hsa_retrop16313	ENST00000492524	17	35519530	35520050	+	ENSP00000222247	ENSG00000105640	19	0.727	0.7399
hsa_retrop16323	ENST00000462007	17	37011567	37011920	+	ENSP00000009589	ENSG00000008988	8	0.916	0.1077
hsa_retrom16336	hsa_retrom16336	17	37991350	37992715	-	ENSP00000449404	ENSG00000170421	12	0.755	0.4474
hsa_retrop16344	hsa_retrop16344	17	38524203	38524690	+	ENSP00000419425	ENSG00000196262	7	0.86	0.1483
hsa_retrom16349	ENST00000491601	17	38595722	38596084	-	ENSP00000389103	ENSG00000198242	17	0.909	0.0821
hsa_retrop16366	hsa_retrop16366	17	40685546	40685992	+	ENSP00000344909	ENSG00000184007	1	0.925	0.0339
hsa_retrop16390	hsa_retrop16390	17	40800232	40800732	+	ENSP00000410354	ENSG00000029993	X	0.899	0.0991
hsa_retrop16395	ENST00000479088	17	40866342	40866661	+	ENSP00000423983	ENSG00000109475	4	0.785	0.1718
hsairetrom16221	hsairetrom16221	17	40905511	40905897	-	ENSGGOP00000000955	ENSGGOG00000000971	1	0.933	NA
hsa_retrop16405	ENST00000497954	17	41231319	41231552	+	ENSP00000434298	ENSG00000122026	13	0.91	0.0764
hsa_retrop16421	ENST00000431445	17	41553566	41553922	+	ENSP00000418346	ENSG00000162244	3	0.882	0.0689
hsa_retrom16415	hsa_retrom16415	17	42306496	42307596	-	ENSP00000357426	ENSG00000160691	1	0.843	0.1775
hsa_retrom16417	hsa_retrom16417	17	42442385	42442988	-	ENSP00000418221	ENSG00000146223	6	0.871	0.0487
hsa_retrom16420	ENST00000472109	17	42797131	42797816	-	ENSP00000202773	ENSG00000089009	12	0.795	0.172
hsa_retrop16438	hsa_retrop16438	17	43663237	43664292	+	ENSP00000445366	ENSG00000256453	5	0.929	0.043
hsairetrom16311	hsairetrom16311	17	43678238	43679574	-	ENSMODP00000034204	ENSMODG00000019877	5	0.877	NA
hsa_retrom16437	hsa_retrom16437	17	44336917	44337972	-	ENSP00000445366	ENSG00000256453	5	0.933	0.0437
hsa_retrom16442	ENST00000484240	17	44798951	44799533	-	ENSP00000385286	ENSG00000171863	2	0.974	0.006
hsa_retrom16448	ENST00000488906	17	45236560	45237281	-	ENSP00000341885	ENSG00000140988	16	0.884	0.26
hsa_retrop16458	hsa_retrop16458	17	45444964	45446474	+	ENSP00000356903	ENSG00000117143	1	0.838	0.1547
hsa_retrom16471	ENST00000461606	17	46768481	46769056	-	ENSP00000400467	ENSG00000163682	4	0.865	0.0472
hsa_retrop16464	ENST00000489624	17	46791092	46791307	+	ENSP00000246554	ENSG00000126267	19	0.667	0.3503
hsa_retrom16479	ENST00000504438	17	46952273	46952542	-	ENSP00000330343	ENSG00000184900	21	0.944	5.4708
hsa_retrop16468	ENST00000511142	17	47114499	47114793	+	ENSP00000418348	ENSG00000187118	3	0.848	0.0579
hsairetrom16437	ENST00000465845	17	47225804	47226136	-	ENSMODP00000017415	ENSMODG00000013929	2	0.775	NA
hsa_retrom16489	ENST00000462104	17	47477794	47478156	-	ENSP00000370574	ENSG00000122026	13	0.702	0.1093
hsa_retrom16496	ENST00000398202	17	47501634	47502284	-	ENSP00000389624	ENSG00000151247	4	0.991	0.0098
hsa_retrop16472	ENST00000513669	17	47872705	47872947	+	ENSP00000453120	ENSG00000140319	15	0.852	0.1009
hsa_retrop16473	ENST00000515049	17	48016486	48017137	+	ENSP00000364320	ENSG00000053372	1	0.879	0.1021
hsa_retrop16479	ENST00000511179	17	48313206	48313490	+	ENSP00000405965	ENSG00000188612	17	0.842	0.0693
hsa_retrop16502	ENST00000487833	17	48925359	48926057	+	ENSP00000359345	ENSG00000122406	1	0.786	0.2184
hsa_retrom16513	ENST00000461513	17	49579852	49580546	-	ENSP00000339795	ENSG00000147604	8	0.897	0.0839
hsa_retrom16517	ENST00000441047	17	51834353	51835072	-	ENSP00000341885	ENSG00000140988	16	0.946	0.1552
hsa_retrop16508	ENST00000268919	17	51900395	51902413	+	ENSP00000423772	ENSG00000068796	5	0.589	4.5577
hsa_retrop16537	hsa_retrop16537	17	52555163	52555479	+	ENSP00000365159	ENSG00000135070	9	0.879	0.0619
hsa_retrop16538	hsa_retrop16538	17	52780381	52780687	+	ENSP00000449490	ENSG00000111245	12	0.515	62.6329
hsa_retrom16519	hsa_retrom16519	17	52831526	52831944	-	ENSP00000219204	ENSG00000102931	16	0.729	0.2156
hsa_retrop16540	hsa_retrop16540	17	55029472	55029762	+	ENSP00000318646	ENSG00000134419	16	0.825	0.16
hsa_retrom16528	hsa_retrom16528	17	56553635	56554307	-	ENSP00000318012	ENSG00000119335	9	0.906	0.0951
hsa_retrom16531	hsa_retrom16531	17	56737941	56738954	-	ENSP00000348784	ENSG00000089289	X	0.858	0.1797
hsa_retrop16578	hsa_retrop16578	17	57358489	57358699	+	ENSP00000272348	ENSG00000143977	2	0.824	0.2176
hsa_retrop16584	hsa_retrop16584	17	57962376	57962913	+	ENSP00000299166	ENSG00000166136	10	0.796	0.1718
hsa_retrom16546	hsa_retrom16546	17	58179544	58180020	-	ENSP00000369645	ENSG00000182287	X	0.994	0.0117
hsa_retrom16553	ENST00000475274	17	58322665	58323008	-	ENSP00000339064	ENSG00000144713	3	0.639	0.2037
hsairetrop16719	hsairetrop16719	17	58393231	58393576	+	ENSMUSP00000124509	ENSMUSG00000060743	1	0.659	NA
hsa_retrom16555	ENST00000471280	17	58511087	58511573	-	ENSP00000354739	ENSG00000197958	9	0.94	0.0569
hsa_retrom16561	ENST00000437414	17	58804529	58804879	-	ENSP00000446503	ENSG00000241343	X	0.877	0.7817
hsa_retrop16591	hsa_retrop16591	17	58887560	58888540	+	ENSP00000447278	ENSG00000111057	12	0.798	0.17
hsa_retrop16596	ENST00000437246	17	59147322	59147699	+	ENSP00000389103	ENSG00000198242	17	0.952	0.0093
hsairetrom16610	NA	17	59667897	59668475	-	ENSMODP00000024778	ENSMODG00000019856	Un	0.896	NA
hsa_retrom16575	hsa_retrom16575	17	60214333	60218000	-	ENSP00000215591	ENSG00000099821	19	0.969	0.0712
hsa_retrop16603	ENST00000467217	17	60397218	60397547	+	ENSP00000446503	ENSG00000241343	X	0.755	0.2072
hsa_retrop16611	ENST00000466210	17	60474758	60475102	+	ENSP00000425865	ENSG00000186468	5	0.817	0.1627
hsa_retrop16615	hsa_retrop16615	17	60918462	60918986	+	ENSP00000348206	ENSG00000101166	20	0.81	0.2231
hsa_retrom16581	hsa_retrom16581	17	61028195	61028526	-	ENSP00000438349	ENSG00000173113	11	0.838	0.2272
hsa_retrom16582	hsa_retrom16582	17	61409346	61409900	-	ENSP00000280557	ENSG00000139726	12	0.791	0.0962
hsa_retrop16627	ENST00000416490	17	61548965	61549450	+	ENSP00000419425	ENSG00000196262	7	0.876	0.1148
hsa_retrom16583	hsa_retrom16583	17	61688132	61688546	-	ENSP00000037869	ENSG00000035141	2	0.841	0.1437
hsa_retrom16629	ENST00000461109	17	62385748	62386050	-	ENSP00000412976	ENSG00000071082	2	0.802	0.3062
hsa_retrom16630	hsa_retrom16630	17	62743382	62743610	-	ENSP00000325562	ENSG00000173436	1	0.897	0.0874
hsa_retrom16646	hsa_retrom16646	17	63639719	63640303	-	ENSP00000364935	ENSG00000213719	6	0.867	0.1317
hsa_retrop16644	hsa_retrop16644	17	63651032	63651513	+	ENSP00000221114	ENSG00000104671	8	0.863	0.0781
hsa_retrom16647	hsa_retrom16647	17	63996873	63997250	-	ENSP00000219169	ENSG00000102898	16	0.921	0.1219
hsa_retrop16646	hsa_retrop16646	17	64193870	64194597	+	ENSP00000219313	ENSG00000103035	16	0.881	0.1039
hsa_retrop16656	hsa_retrop16656	17	64754291	64754754	+	ENSP00000419425	ENSG00000196262	7	0.682	0.2111
hsa_retrop16660	ENST00000485521	17	65220787	65221154	+	ENSP00000404375	ENSG00000241343	X	0.88	0.2373
hsa_retrop16663	hsa_retrop16663	17	65409680	65410038	+	ENSP00000317780	ENSG00000178741	15	0.7	0.1919
hsa_retrop16666	ENST00000469329	17	65780966	65781349	+	ENSP00000389465	ENSG00000215472	18	0.826	0.0566
hsa_retrom16660	hsa_retrom16660	17	66130652	66131745	-	ENSP00000269886	ENSG00000141985	19	0.858	0.3476
hsa_retrop16704	hsa_retrop16704	17	68237411	68237899	+	ENSP00000349467	ENSG00000198668	14	0.829	5.9068
hsa_retrop16723	ENST00000412707	17	69617101	69617571	+	ENSP00000446955	ENSG00000092841	12	0.873	0.1676
hsa_retrop16742	ENST00000487023	17	70623370	70623734	+	ENSP00000412393	ENSG00000144713	3	0.776	0.3355
hsa_retrom16669	hsa_retrom16669	17	71064009	71064443	-	ENSP00000274459	ENSG00000145782	5	0.931	0.0581
hsa_retrom16670	hsa_retrom16670	17	71159174	71159500	-	ENSP00000293860	ENSG00000161980	16	0.727	0.1026
hsa_retrop16765	ENST00000413334	17	73334896	73335240	+	ENSP00000404375	ENSG00000241343	X	0.9	0.1522
hsa_retrom16689	ENST00000471402	17	74426502	74427161	-	ENSP00000339795	ENSG00000147604	8	0.733	0.1894
hsa_retrop16776	hsa_retrop16776	17	76153910	76154278	+	ENSP00000336776	ENSG00000132507	17	0.886	0.0961
hsa_retrop16777	hsa_retrop16777	17	76518329	76518715	+	ENSP00000395472	ENSG00000099901	22	0.707	0.3818
hsa_retrom16695	ENST00000460239	17	76842156	76842517	-	ENSP00000422191	ENSG00000163682	4	0.754	0.2579
hsa_retrop16793	ENST00000471666	17	78516003	78516405	+	ENSP00000380156	ENSG00000144713	3	0.844	0.1416
hsa_retrom16710	ENST00000545500	17	78576352	78576726	-	ENSP00000386681	ENSG00000071082	2	0.848	0.1474
hsa_retrop16795	ENST00000486874	17	78950262	78950745	+	ENSP00000354739	ENSG00000197958	9	0.852	0.1288
hsa_retrop16816	ENST00000425566	17	81187815	81188177	+	ENSP00000389103	ENSG00000198242	17	0.83	0.2123
hsa_retrop16833	ENST00000327228	18	580409	580924	+	ENSP00000359300	ENSG00000147400	X	0.837	4.431
hsa_retrop16844	hsa_retrop16844	18	2568769	2569118	+	ENSP00000360739	ENSG00000244687	20	0.752	0.194
hsa_retrom16806	ENST00000443475	18	2594433	2594887	-	ENSP00000453996	ENSG00000134152	15	0.761	0.2039
hsa_retrom16812	hsa_retrom16812	18	2946124	2946531	-	ENSP00000436945	ENSG00000110172	11	0.956	0.0715
hsairetrom16963	ENST00000486139	18	3377924	3378232	-	ENSGGOP00000026272	ENSGGOG00000006432	2a	0.705	NA
hsa_retrom16825	ENST00000490908	18	3406343	3406816	-	ENSP00000370569	ENSG00000122026	13	0.887	0.1103
hsa_retrom16831	ENST00000509132	18	3977649	3978615	-	ENSP00000380068	ENSG00000111640	12	0.767	0.4627
hsairetrom16984	hsairetrom16984	18	5002757	5003249	-	ENSGGOP00000019965	ENSGGOG00000026298	7	0.828	NA
hsairetrom16988	ENST00000400144	18	5132794	5133159	-	ENSMMUP00000018141	ENSMMUG00000013793	6	0.641	NA
hsa_retrom16844	ENST00000489915	18	6462146	6463009	-	ENSP00000202773	ENSG00000089009	12	0.99	0.0097
[truncated: 3,164 more rows]

## Sheet: Chimpanzee
# Supplemental Table S1: Retrocopy annotation in chimpanzee (genome assembly version: CHIMP2.1.4)
# annotated_retro_ID refers to the annotated Ensembl65 transcript overlapping most of the retrocopy locus
# Parental id% refers to the identity between the FASTY translated retrocopy and annotated parental protein
# dS values could not be calculated for retrocopies identified using parental proteins from other species
retro_ID	annotated_retro_ID	chr	start	end	strand	parental_protein	parental_gene	parental_chr	parental_id%	dS	comments
ptr_retrop10258	ptr_retrop10258	1	1590584	1590989	+	ENSPTRP00000019976	ENSPTRG00000011615	2A	0.693	0.2191
ptr_retrom09912	ptr_retrom09912	1	6832716	6832985	-	ENSPTRP00000059851	ENSPTRG00000016822	5	0.744	0.1515
ptriretrom37568	ptriretrom37568	1	8059921	8060623	-	ENSP00000361076	ENSG00000148303	9	0.85	NA
ptriretrop38313	ptriretrop38313	1	8771297	8771968	+	ENSGGOP00000007854	ENSGGOG00000008034	8	0.865	NA
ptriretrom37574	ptriretrom37574	1	8808979	8809711	-	ENSGGOP00000007854	ENSGGOG00000008034	8	0.866	NA
ptriretrop38339	ptriretrop38339	1	9671899	9672454	+	ENSP00000346022	ENSG00000163682	4	0.807	NA
ptr_retrom09917	ptr_retrom09917	1	10176941	10177274	-	ENSPTRP00000009758	ENSPTRG00000005728	13	0.71	0.1088
ptr_retrom09926	ENSPTRT00000067872	1	13043611	13044489	-	ENSPTRP00000046641	ENSPTRG00000006118	14	0.84	0.1239
ptr_retrom09932	ptr_retrom09932	1	14792868	14793146	-	ENSPTRP00000029133	ENSPTRG00000017013	5	0.849	0.1909
ptriretrom37665	ptriretrom37665	1	15298369	15298976	-	ENSP00000304134	ENSG00000168958	2	0.805	NA
ptr_retrop10282	ptr_retrop10282	1	15915426	15915908	+	ENSPTRP00000038960	ENSPTRG00000022808	9	0.907	0.0688
ptr_retrom09934	ENSPTRT00000073304	1	15929617	15929895	-	ENSPTRP00000001203	ENSPTRG00000000691	1	0.925	0.0158
ptr_retrom09936	ptr_retrom09936	1	16503287	16503580	-	ENSPTRP00000026873	ENSPTRG00000015620	3	0.646	9.8567
ptriretrom37707	ptriretrom37707	1	18445627	18445956	-	ENSGGOP00000008597	ENSGGOG00000008793	12	0.874	NA
ptr_retrop10290	ptr_retrop10290	1	19561715	19562134	+	ENSPTRP00000029765	ENSPTRG00000017418	5	0.921	0.0715
ptriretrop38493	ptriretrop38493	1	20498356	20499011	+	ENSOANP00000004684	ENSOANG00000002949	Ultra315	0.759	NA
ptr_retrom09940	ptr_retrom09940	1	20990073	20990462	-	ENSPTRP00000013350	ENSPTRG00000007823	16	0.724	0.2864
ptr_retrom09941	ENSPTRT00000063947	1	21447758	21448121	-	ENSPTRP00000014707	ENSPTRG00000008616	17	0.769	0.1842
ptr_retrop10300	ptr_retrop10300	1	21903114	21903593	+	ENSPTRP00000009758	ENSPTRG00000005728	13	0.906	0.0291
ptr_retrom09943	ptr_retrom09943	1	22320883	22321362	-	ENSPTRP00000042839	ENSPTRG00000023064	7	0.817	0.1152
ptriretrop38580	ptriretrop38580	1	23253255	23253715	+	ENSGGOP00000019158	ENSGGOG00000024691	3	0.884	NA
ptr_retrop10307	ptr_retrop10307	1	23426909	23427219	+	ENSPTRP00000060976	ENSPTRG00000019778	7	0.695	0.0906
ptr_retrom09947	ptr_retrom09947	1	23922992	23924255	-	ENSPTRP00000022731	ENSPTRG00000013252	20	0.758	56.9516
ptr_retrom09961	ptr_retrom09961	1	23969563	23969973	-	ENSPTRP00000016407	ENSPTRG00000009655	17	0.853	20.4912
ptr_retrop10311	ptr_retrop10311	1	24605620	24605989	+	ENSPTRP00000014891	ENSPTRG00000008742	17	0.596	0.5353
ptr_retrom09967	ptr_retrom09967	1	25316290	25316679	-	ENSPTRP00000013350	ENSPTRG00000007823	16	0.962	0.0082
ptr_retrop10313	ptr_retrop10313	1	25581904	25582384	+	ENSPTRP00000009758	ENSPTRG00000005728	13	1	0
ptriretrop38630	ptriretrop38630	1	25881353	25881574	+	ENSP00000266735	ENSG00000139343	12	0.827	NA
ptr_retrom09970	ptr_retrom09970	1	26269455	26269812	-	ENSPTRP00000023883	ENSPTRG00000013877	21	0.702	0.1693
ptr_retrop10316	ptr_retrop10316	1	26335779	26336128	+	ENSPTRP00000039611	ENSPTRG00000016353	4	0.795	0.0989
ptr_retrom09971	ptr_retrom09971	1	26467441	26467935	-	ENSPTRP00000017019	ENSPTRG00000010012	18	0.909	0.0572
ptr_retrom09972	ptr_retrom09972	1	26530271	26531164	-	ENSPTRP00000026228	ENSPTRG00000015199	3	0.893	0.0763
ptr_retrop10322	ENSPTRT00000037889	1	26865086	26865817	+	ENSPTRP00000020019	ENSPTRG00000011641	2A	0.717	83.302
ptr_retrop10324	ptr_retrop10324	1	26983018	26983377	+	ENSPTRP00000038960	ENSPTRG00000022808	9	0.917	0.1327
ptr_retrom09976	ptr_retrom09976	1	26988748	26989192	-	ENSPTRP00000042964	ENSPTRG00000024222	4	0.937	0.1119
ptr_retrop10327	ptr_retrop10327	1	27185601	27186126	+	ENSPTRP00000018237	ENSPTRG00000010686	19	0.863	0.2233
ptr_retrom09981	ptr_retrom09981	1	27199037	27199701	-	ENSPTRP00000033763	ENSPTRG00000019711	7	0.964	0.0129
ptriretrop38694	ptriretrop38694	1	27205105	27205975	+	ENSGGOP00000007063	ENSGGOG00000007220	5	0.937	NA
ptr_retrom09983	ptr_retrom09983	1	27693271	27693854	-	ENSPTRP00000014470	ENSPTRG00000008483	16	0.765	0.7633
ptr_retrop10332	ptr_retrop10332	1	27746411	27746737	+	ENSPTRP00000014752	ENSPTRG00000008644	17	0.804	0.2074
ptriretrop38723	ptriretrop38723	1	27747259	27747845	+	ENSP00000352401	ENSG00000197713	2	0.786	NA
ptr_retrom09988	ptr_retrom09988	1	28134877	28135505	-	ENSPTRP00000025125	ENSPTRG00000014572	3	0.852	0.069
ptr_retrom09994	ptr_retrom09994	1	29972235	29972724	-	ENSPTRP00000022806	ENSPTRG00000013299	20	0.548	0.5633
ptriretrop38760	ptriretrop38760	1	31140086	31140561	+	ENSP00000370197	ENSG00000085231	5	0.683	NA
ptr_retrom09996	ptr_retrom09996	1	31219129	31219606	-	ENSPTRP00000009758	ENSPTRG00000005728	13	0.875	0.099
ptr_retrom09998	ptr_retrom09998	1	31605566	31606826	-	ENSPTRP00000045593	ENSPTRG00000018347	6	0.739	0.2887
ptr_retrom10002	ptr_retrom10002	1	32542272	32543254	-	ENSPTRP00000007822	ENSPTRG00000004577	12	0.71	0.3759
ptr_retrop10345	ptr_retrop10345	1	33168145	33168669	+	ENSPTRP00000018237	ENSPTRG00000010686	19	0.818	0.2883
ptr_retrom10006	ptr_retrom10006	1	33702797	33703488	-	ENSPTRP00000010840	ENSPTRG00000006390	14	0.758	0.2493
ptr_retrop10364	ptr_retrop10364	1	35549397	35550283	+	ENSPTRP00000001659	ENSPTRG00000000963	1	0.882	0.0497
ptriretrop38901	ptriretrop38901	1	37775061	37775592	+	ENSMODP00000009409	ENSMODG00000007582	5	0.833	NA
ptr_retrom10011	ptr_retrom10011	1	38016870	38017515	-	ENSPTRP00000010722	ENSPTRG00000006327	14	0.86	0.0953
ptriretrop38924	ptriretrop38924	1	38078135	38078850	+	ENSP00000341885	ENSG00000140988	16	0.74	NA
ptr_retrop10372	ptr_retrop10372	1	38944242	38946138	+	ENSPTRP00000000984	ENSPTRG00000000563	9	0.912	0.0488
ptr_retrop10375	ptr_retrop10375	1	39783827	39785375	+	ENSPTRP00000028847	ENSPTRG00000016829	5	0.746	2.9135
ptriretrop38955	ptriretrop38955	1	39999199	39999809	+	ENSMMUP00000021065	ENSMMUG00000016016	8	0.92	NA
ptr_retrop10377	ptr_retrop10377	1	40420282	40420955	+	ENSPTRP00000017391	ENSPTRG00000010230	19	0.814	0.2161
ptr_retrom10020	ptr_retrom10020	1	40633758	40634237	-	ENSPTRP00000009758	ENSPTRG00000005728	13	0.95	0.043
ptr_retrom10021	ptr_retrom10021	1	40898018	40898656	-	ENSPTRP00000040063	ENSPTRG00000005840	GL392075.1	0.626	0.8938
ptriretrop38999	ptriretrop38999	1	41413481	41413808	+	ENSOANP00000015173	ENSOANG00000009558	Ultra497	0.765	NA
ptriretrom38135	ptriretrom38135	1	41579903	41580214	-	ENSP00000446503	ENSG00000241343	X	0.71	NA
ptr_retrop10383	ptr_retrop10383	1	42450302	42450674	+	ENSPTRP00000009758	ENSPTRG00000005728	13	0.684	0.3224
ptr_retrom10026	ptr_retrom10026	1	42727871	42728264	-	ENSPTRP00000013350	ENSPTRG00000007823	16	0.752	0.1973
ptriretrop39013	ptriretrop39013	1	42808577	42809153	+	ENSMODP00000001156	ENSMODG00000000969	5	0.801	NA
ptriretrom38156	ptriretrom38156	1	42817439	42817642	-	ENSGGOP00000006307	ENSGGOG00000006450	X	0.971	NA
ptr_retrom10029	ptr_retrom10029	1	43210927	43212192	-	ENSPTRP00000033861	ENSPTRG00000019766	7	0.857	0.0845
ptriretrop39029	ptriretrop39029	1	43223065	43223742	+	ENSP00000253413	ENSG00000131100	22	0.912	NA
ptriretrop39047	ptriretrop39047	1	44062127	44062399	+	ENSMMUP00000008895	ENSMMUG00000006760	3	0.733	NA
ptr_retrom10032	ptr_retrom10032	1	44171771	44173080	-	ENSPTRP00000015094	ENSPTRG00000008851	17	0.862	0.1653
ptr_retrom10037	ptr_retrom10037	1	44426773	44428151	-	ENSPTRP00000008493	ENSPTRG00000004987	12	0.572	105.31
ptr_retrom10039	ptr_retrom10039	1	44477975	44478314	-	ENSPTRP00000058878	ENSPTRG00000034506	11	0.681	0.2714
ptriretrom38208	ptriretrom38208	1	44513773	44514452	-	ENSP00000423302	ENSG00000177034	5	0.711	NA
ptr_retrom10043	ptr_retrom10043	1	45123597	45123986	-	ENSPTRP00000013350	ENSPTRG00000007823	16	0.931	0.047
ptr_retrop10391	ptr_retrop10391	1	45302082	45302813	+	ENSPTRP00000039061	ENSPTRG00000006088	14	0.891	0.0677
ptr_retrom10047	ptr_retrom10047	1	45336245	45336733	-	ENSPTRP00000042839	ENSPTRG00000023064	7	0.86	0.1435
ptr_retrom10050	ptr_retrom10050	1	45418508	45418957	-	ENSPTRP00000042964	ENSPTRG00000024222	4	0.91	0.0866
ptr_retrom10053	ptr_retrom10053	1	46002752	46003059	-	ENSPTRP00000013350	ENSPTRG00000007823	16	0.792	0.2458
ptriretrom38272	ptriretrom38272	1	46005996	46006703	-	ENSMUSP00000099962	ENSMUSG00000062647	2	0.851	NA
ptriretrop39102	ptriretrop39102	1	46140097	46140777	+	ENSP00000202773	ENSG00000089009	12	0.903	NA
ptr_retrom10055	ptr_retrom10055	1	46207242	46207847	-	ENSPTRP00000039312	ENSPTRG00000023618	4	0.837	0.0985
ptriretrop39135	ptriretrop39135	1	47119847	47120774	+	ENSPPYP00000013812	ENSPPYG00000012385	2a	0.748	NA
ptr_retrop10411	ptr_retrop10411	1	47273778	47274969	+	ENSPTRP00000008376	ENSPTRG00000004902	12	0.755	0.2824
ptr_retrom10065	ptr_retrom10065	1	47447974	47449165	-	ENSPTRP00000008376	ENSPTRG00000004902	12	0.762	0.2878
ptr_retrom10067	ptr_retrom10067	1	47867933	47868378	-	ENSPTRP00000009758	ENSPTRG00000005728	13	0.747	0.2645
ptr_retrom10068	ptr_retrom10068	1	48688919	48689961	-	ENSPTRP00000000731	ENSPTRG00000000417	1	0.818	0.1055
ptriretrop39158	ENSPTRT00000065159	1	48798286	48799522	+	ENSGGOP00000011897	ENSGGOG00000012183	2b	0.967	NA
ptr_retrom10070	ptr_retrom10070	1	48856336	48856804	-	ENSPTRP00000009758	ENSPTRG00000005728	13	0.783	0.3306
ptriretrom38346	ptriretrom38346	1	50764652	50765055	-	ENSGGOP00000028322	ENSGGOG00000026764	13	0.809	NA
ptr_retrom10072	ptr_retrom10072	1	50771178	50771757	-	ENSPTRP00000011102	ENSPTRG00000006540	14	0.869	0.0641
ptriretrop39185	ptriretrop39185	1	51147644	51148456	+	ENSGALP00000001750	ENSGALG00000001162	27	0.684	NA
ptr_retrop10414	ptr_retrop10414	1	51216840	51217210	+	ENSPTRP00000023883	ENSPTRG00000013877	21	0.792	0.0681
ptr_retrom10075	ptr_retrom10075	1	51529581	51530078	-	ENSPTRP00000004744	ENSPTRG00000003895	11	0.861	0.1992
ptriretrom38367	ptriretrom38367	1	51625619	51626338	-	ENSP00000341885	ENSG00000140988	16	0.929	NA
ptr_retrop10416	ptr_retrop10416	1	51748323	51749163	+	ENSPTRP00000014246	ENSPTRG00000008343	16	0.799	0.2679
ptr_retrom10076	ptr_retrom10076	1	52100321	52101329	-	ENSPTRP00000007822	ENSPTRG00000004577	12	0.755	0.4572
ptr_retrop10418	ptr_retrop10418	1	52102243	52103086	+	ENSPTRP00000028544	ENSPTRG00000016646	4	0.641	71.3903
ptriretrop39227	ptriretrop39227	1	52583735	52584259	+	ENSMUSP00000027247	ENSMUSG00000026078	1	0.851	NA
ptriretrop39238	ptriretrop39238	1	52658108	52658666	+	ENSP00000403891	ENSG00000164162	4	0.903	NA
ptriretrom38399	ptriretrom38399	1	53202449	53202887	-	ENSGALP00000009821	ENSGALG00000006096	5	0.94	NA
ptr_retrom10090	ptr_retrom10090	1	53386122	53386490	-	ENSPTRP00000016407	ENSPTRG00000009655	17	0.795	53.0032
ptr_retrom10098	ptr_retrom10098	1	53441269	53441772	-	ENSPTRP00000005902	ENSPTRG00000003383	11	0.988	0.0186
ptr_retrop10435	ptr_retrop10435	1	53442793	53444042	+	ENSPTRP00000030606	ENSPTRG00000017939	6	0.793	0.3124
ptr_retrom10102	ptr_retrom10102	1	53522201	53522502	-	ENSPTRP00000060206	ENSPTRG00000014802	3	0.808	0.2721
ptr_retrom10103	ptr_retrom10103	1	53887650	53888437	-	ENSPTRP00000009060	ENSPTRG00000005333	12	0.683	15.1668
ptr_retrop10437	ptr_retrop10437	1	54301691	54301947	+	ENSPTRP00000059851	ENSPTRG00000016822	5	0.709	0.1685
ptr_retrom10105	ptr_retrom10105	1	54332332	54332850	-	ENSPTRP00000060658	ENSPTRG00000040156	12	0.985	0.0001
ptriretrom38450	ptriretrom38450	1	54439263	54439856	-	ENSMMUP00000002475	ENSMMUG00000001858	12	0.97	NA
ptriretrom38456	ENSPTRT00000033747	1	54452348	54452926	-	ENSMMUP00000002475	ENSMMUG00000001858	12	0.912	NA
ptriretrop39288	ptriretrop39288	1	54567926	54568165	+	ENSP00000417656	ENSG00000131174	X	0.825	NA
ptriretrop39297	ptriretrop39297	1	55022237	55022617	+	ENSOANP00000021620	ENSOANG00000013708	Contig30988	0.882	NA
ptriretrop39309	ptriretrop39309	1	55715136	55716126	+	ENSP00000296048	ENSG00000163754	3	0.898	NA
ptr_retrop10441	ptr_retrop10441	1	55864074	55865097	+	ENSPTRP00000013976	ENSPTRG00000008185	16	0.707	0.2678
ptr_retrom10108	ptr_retrom10108	1	56722879	56723759	-	ENSPTRP00000025475	ENSPTRG00000022841	3	0.729	0.3082
ptr_retrom10109	ptr_retrom10109	1	58144681	58145016	-	ENSPTRP00000034700	ENSPTRG00000020264	8	0.777	0.1712
ptriretrom38494	ptriretrom38494	1	58592281	58592653	-	ENSOANP00000021620	ENSOANG00000013708	Contig30988	0.896	NA
ptr_retrom10110	ENSPTRT00000001504	1	59106892	59107788	-	ENSPTRP00000051989	ENSPTRG00000011902	2A	0.502	70.6064
ptr_retrop10444	ptr_retrop10444	1	59540781	59541596	+	ENSPTRP00000015927	ENSPTRG00000009376	17	0.897	0.0889
ptr_retrom10112	ptr_retrom10112	1	62399745	62400224	-	ENSPTRP00000009758	ENSPTRG00000005728	13	1	0.0127
ptriretrop39346	ptriretrop39346	1	62608211	62608480	+	ENSGALP00000000571	ENSGALG00000000419	26	0.815	NA
ptr_retrop10447	ptr_retrop10447	1	62761224	62761630	+	ENSPTRP00000013350	ENSPTRG00000007823	16	0.704	0.2195
ptr_retrom10114	ptr_retrom10114	1	63223490	63224046	-	ENSPTRP00000019396	ENSPTRG00000011298	19	0.793	0.4346
ptr_retrom10115	ptr_retrom10115	1	63946429	63947813	-	ENSPTRP00000015651	ENSPTRG00000009188	17	0.813	0.2054
ptriretrom38553	ptriretrom38553	1	64379880	64380466	-	ENSPPYP00000009543	ENSPPYG00000008492	17	0.867	NA
ptr_retrom10118	ptr_retrom10118	1	64434589	64435071	-	ENSPTRP00000004744	ENSPTRG00000003895	11	0.833	0.2033
ptr_retrop10448	ptr_retrop10448	1	65508922	65509162	+	ENSPTRP00000032349	ENSPTRG00000018934	7	0.695	0.1435
ptr_retrom10121	ptr_retrom10121	1	65576434	65577914	-	ENSPTRP00000007897	ENSPTRG00000004626	12	0.838	0.1429
ptr_retrom10123	ptr_retrom10123	1	66167091	66168768	-	ENSPTRP00000034064	ENSPTRG00000019891	7	0.755	0.2576
ptr_retrom10124	ptr_retrom10124	1	68284890	68285607	-	ENSPTRP00000046641	ENSPTRG00000006118	14	0.723	0.2529
ptr_retrom10127	ptr_retrom10127	1	68787473	68788727	-	ENSPTRP00000053767	ENSPTRG00000015827	4	0.749	5.246
ptr_retrom10129	ptr_retrom10129	1	68869657	68870238	-	ENSPTRP00000019976	ENSPTRG00000011615	2A	0.943	0.0533
ptriretrop39397	ptriretrop39397	1	68909914	68910146	+	ENSP00000246554	ENSG00000126267	19	0.62	NA
ptr_retrop10451	ptr_retrop10451	1	70554138	70554618	+	ENSPTRP00000017779	ENSPTRG00000010452	19	0.853	0.2344
ptriretrop39410	ptriretrop39410	1	71168875	71169282	+	ENSP00000436945	ENSG00000110172	11	0.92	NA
ptr_retrom10132	ptr_retrom10132	1	71287907	71288505	-	ENSPTRP00000054330	ENSPTRG00000016640	4	0.825	0.1524
ptriretrop39417	ptriretrop39417	1	72937529	72937876	+	ENSGGOP00000026272	ENSGGOG00000006432	2a	0.777	NA
ptr_retrop10456	ptr_retrop10456	1	73752992	73754472	+	ENSPTRP00000008481	ENSPTRG00000004969	12	0.56	2.5724
ptriretrop39440	ptriretrop39440	1	76241541	76241728	+	ENSGALP00000033891	ENSGALG00000001454	12	0.889	NA
ptr_retrom10134	ptr_retrom10134	1	76404442	76405793	-	ENSPTRP00000011110	ENSPTRG00000006543	14	0.936	0.0325
ptr_retrop10458	ptr_retrop10458	1	77363353	77364098	+	ENSPTRP00000057240	ENSPTRG00000004595	12	0.968	0.0372
ptr_retrop10459	ptr_retrop10459	1	77794507	77795058	+	ENSPTRP00000017019	ENSPTRG00000010012	18	0.984	0.0238
ptr_retrom10140	ptr_retrom10140	1	78456750	78457762	-	ENSPTRP00000039339	ENSPTRG00000018890	7	0.804	0.5508
ptr_retrom10141	ptr_retrom10141	1	78728545	78729295	-	ENSPTRP00000051200	ENSPTRG00000015161	3	0.769	0.16
ptr_retrop10461	ptr_retrop10461	1	78777202	78777699	+	ENSPTRP00000026787	ENSPTRG00000015560	3	0.916	0.1103
ptr_retrop10463	ptr_retrop10463	1	79439944	79441509	+	ENSPTRP00000011189	ENSPTRG00000006587	14	0.868	0.1036
ptriretrom38692	ptriretrom38692	1	79740355	79741463	-	ENSMMUP00000015577	ENSMMUG00000011868	15	0.927	NA
ptr_retrop10467	ptr_retrop10467	1	80206954	80208080	+	ENSPTRP00000028003	ENSPTRG00000016303	4	0.872	0.1078
ptr_retrop10469	ptr_retrop10469	1	80971008	80971522	+	ENSPTRP00000028484	ENSPTRG00000016597	4	0.659	17.0874
ptriretrom38699	ptriretrom38699	1	81144783	81145410	-	ENSMMUP00000017057	ENSMMUG00000012989	11	0.871	NA
ptr_retrom10146	ptr_retrom10146	1	81157782	81158140	-	ENSPTRP00000034647	ENSPTRG00000020231	8	0.615	1.8071
ptr_retrop10471	ptr_retrop10471	1	81190426	81190662	+	ENSPTRP00000009388	ENSPTRG00000005532	12	0.835	0.1191
ptriretrom38713	ptriretrom38713	1	81789939	81790681	-	ENSGGOP00000021992	ENSGGOG00000008034	8	0.883	NA
ptr_retrop10472	ptr_retrop10472	1	81901154	81901802	+	ENSPTRP00000030891	ENSPTRG00000018085	6	0.843	0.1795
ptriretrop39530	ptriretrop39530	1	82123335	82123711	+	ENSOANP00000021620	ENSOANG00000013708	Contig30988	0.717	NA
ptr_retrom10147	ptr_retrom10147	1	82288902	82289213	-	ENSPTRP00000034700	ENSPTRG00000020264	8	0.865	0.2137
ptriretrop39541	ptriretrop39541	1	84807518	84808007	+	ENSP00000385393	ENSG00000100348	22	0.849	NA
ptr_retrom10148	ptr_retrom10148	1	87143121	87143731	-	ENSPTRP00000031053	ENSPTRG00000018175	6	0.706	0.1789
ptriretrop39568	ptriretrop39568	1	89363257	89363570	+	ENSPPYP00000023470	ENSPPYG00000025837	X	0.788	NA
ptriretrom38759	ENSPTRT00000001765	1	89779067	89780125	-	ENSP00000359645	ENSG00000147274	X	0.96	NA
ptr_retrom10153	ptr_retrom10153	1	89901232	89901711	-	ENSPTRP00000008687	ENSPTRG00000005108	12	0.969	0.0576
ptr_retrom10154	ptr_retrom10154	1	90087471	90088129	-	ENSPTRP00000006102	ENSPTRG00000003514	11	0.878	0.1018
ptr_retrop10476	ptr_retrop10476	1	90157881	90158510	+	ENSPTRP00000018650	ENSPTRG00000010887	19	0.686	0.3492
ptr_retrom10155	ptr_retrom10155	1	90418776	90419019	-	ENSPTRP00000032349	ENSPTRG00000018934	7	0.841	0.1071
ptr_retrop10486	ptr_retrop10486	1	91791285	91792170	+	ENSPTRP00000001659	ENSPTRG00000000963	1	0.882	0.1124
ptriretrom38807	ptriretrom38807	1	92293674	92294444	-	ENSOANP00000021466	ENSOANG00000013610	Contig4951	0.857	NA
ptr_retrop10491	ptr_retrop10491	1	92835756	92837045	+	ENSPTRP00000013861	ENSPTRG00000008124	16	0.636	1.3139
ptr_retrom10159	ptr_retrom10159	1	92843991	92844643	-	ENSPTRP00000036650	ENSPTRG00000021436	9	0.94	0.0775
ptr_retrom10160	ptr_retrom10160	1	92883071	92884069	-	ENSPTRP00000007822	ENSPTRG00000004577	12	0.777	0.4003
ptriretrop39660	ptriretrop39660	1	92893875	92894630	+	ENSMUSP00000106514	ENSMUSG00000025855	5	0.73	NA
ptriretrom38848	ptriretrom38848	1	93962030	93962347	-	ENSPPYP00000023470	ENSPPYG00000025837	X	0.849	NA
ptr_retrop10493	ptr_retrop10493	1	95066636	95067620	+	ENSPTRP00000007822	ENSPTRG00000004577	12	0.738	0.358
ptr_retrom10166	ptr_retrom10166	1	95172113	95172598	-	ENSPTRP00000009758	ENSPTRG00000005728	13	0.687	0.2266
ptr_retrom10167	ptr_retrom10167	1	95417310	95417919	-	ENSPTRP00000011749	ENSPTRG00000006877	15	0.667	0.302
ptr_retrop10496	ptr_retrop10496	1	97246764	97248148	+	ENSPTRP00000045593	ENSPTRG00000018347	6	0.952	0.0444
ptr_retrop10498	ptr_retrop10498	1	98385054	98385476	+	ENSPTRP00000014891	ENSPTRG00000008742	17	0.754	0.5445
ptriretrop39702	ptriretrop39702	1	98884197	98884679	+	ENSGALP00000000045	ENSGALG00000000033	22	0.618	NA
ptriretrop39712	ptriretrop39712	1	100515465	100515853	+	ENSP00000417027	ENSG00000029993	X	0.826	NA
ptr_retrop10504	ptr_retrop10504	1	101041830	101042204	+	ENSPTRP00000033245	ENSPTRG00000019436	7	0.912	0.1349
ptr_retrom10169	ptr_retrom10169	1	101159504	101160298	-	ENSPTRP00000029482	ENSPTRG00000017234	5	0.887	0.0978
ptr_retrom10170	ptr_retrom10170	1	101221714	101222336	-	ENSPTRP00000001951	ENSPTRG00000001136	1	0.89	0.0573
ptriretrom38906	ptriretrom38906	1	101417072	101417839	-	ENSMMUP00000029411	ENSMMUG00000022341	15	0.76	NA
ptriretrop39745	ptriretrop39745	1	101482843	101483160	+	ENSPPYP00000023470	ENSPPYG00000025837	X	0.802	NA
ptriretrom38911	ptriretrom38911	1	101773922	101774430	-	ENSP00000447782	ENSG00000135486	12	0.782	NA
ptr_retrop10512	ptr_retrop10512	1	102094547	102094867	+	ENSPTRP00000034700	ENSPTRG00000020264	8	0.88	0.1308
ptr_retrom10173	ptr_retrom10173	1	102109072	102109515	-	ENSPTRP00000042839	ENSPTRG00000023064	7	0.851	0.1599
ptr_retrom10174	ptr_retrom10174	1	103981678	103982186	-	ENSPTRP00000042459	ENSPTRG00000018757	6	0.609	0.4429
ptr_retrop10515	ptr_retrop10515	1	104581785	104582904	+	ENSPTRP00000039339	ENSPTRG00000018890	7	0.805	1.3514
ptr_retrom10177	ptr_retrom10177	1	105062223	105062683	-	ENSPTRP00000019324	ENSPTRG00000011268	19	0.626	0.2926
ptriretrop39782	ptriretrop39782	1	106748356	106750133	+	ENSP00000426743	ENSG00000015479	5	0.907	NA
ptr_retrop10521	ENSPTRT00000073962	1	108379451	108379693	+	ENSPTRP00000032349	ENSPTRG00000018934	7	0.926	0.0132
ptriretrop39806	ptriretrop39806	1	109227993	109228445	+	ENSP00000438660	ENSG00000100380	22	0.773	NA
ptr_retrop10522	ptr_retrop10522	1	109234460	109235059	+	ENSPTRP00000031053	ENSPTRG00000018175	6	0.728	0.0906
ptr_retrop10523	ptr_retrop10523	1	109725148	109725699	+	ENSPTRP00000017019	ENSPTRG00000010012	18	0.984	0.0158
ptr_retrop10527	ptr_retrop10527	1	109779969	109780617	+	ENSPTRP00000009585	ENSPTRG00000005636	12	0.799	0.2051
ptriretrop39866	ptriretrop39866	1	110409916	110410650	+	ENSGGOP00000021992	ENSGGOG00000008034	8	0.839	NA
ptriretrom38981	ENSPTRT00000074130	1	110447919	110448362	-	ENSP00000261369	ENSG00000064652	5	1	NA
ptriretrop39891	ptriretrop39891	1	111274855	111276516	+	ENSP00000320204	ENSG00000073792	3	0.905	NA
ptr_retrom10202	ptr_retrom10202	1	111396355	111397781	-	ENSPTRP00000052838	ENSPTRG00000030820	1	0.789	0.1128
ptriretrom39020	ptriretrom39020	1	111942347	111943061	-	ENSP00000440281	ENSG00000106853	9	0.875	NA
ptriretrop39906	ptriretrop39906	1	112060154	112061746	+	ENSP00000286788	ENSG00000156261	21	0.932	NA
ptr_retrom10205	ENSPTRT00000074456	1	112085657	112087167	-	ENSPTRP00000051552	ENSPTRG00000007002	15	0.97	0.0224
ptr_retrop10545	ptr_retrop10545	1	112183160	112184394	+	ENSPTRP00000021558	ENSPTRG00000012620	2B	0.866	0.0595
ptr_retrom10206	ptr_retrom10206	1	112215052	112216369	-	ENSPTRP00000032446	ENSPTRG00000018986	7	0.59	17.158
ptriretrop39930	ENSPTRT00000010884	1	112381987	112383357	+	ENSP00000366915	ENSG00000102554	13	0.991	NA
ptr_retrom10209	ptr_retrom10209	1	112419529	112419918	-	ENSPTRP00000014707	ENSPTRG00000008616	17	0.738	0.1739
ptr_retrop10557	ptr_retrop10557	1	113686975	113687364	+	ENSPTRP00000014707	ENSPTRG00000008616	17	0.754	0.1884
ptr_retrop10564	ENSPTRT00000074140	1	116147318	116147860	+	ENSPTRP00000003488	ENSPTRG00000002066	1	1	0.0391
ptr_retrom10222	ptr_retrom10222	1	116824009	116824403	-	ENSPTRP00000014707	ENSPTRG00000008616	17	0.759	0.1681
ptr_retrop10573	ptr_retrop10573	1	117106105	117107117	+	ENSPTRP00000007822	ENSPTRG00000004577	12	0.719	0.3529
ptr_retrop10574	ptr_retrop10574	1	117151305	117152321	+	ENSPTRP00000007822	ENSPTRG00000004577	12	0.695	0.4018
ptr_retrop10575	ptr_retrop10575	1	117176334	117177327	+	ENSPTRP00000007822	ENSPTRG00000004577	12	0.742	0.3058
ptr_retrop10576	ptr_retrop10576	1	117214113	117215072	+	ENSPTRP00000007822	ENSPTRG00000004577	12	0.773	0.2529
ptriretrop40013	ptriretrop40013	1	117251640	117252230	+	ENSP00000380065	ENSG00000111640	12	0.728	NA
ptriretrop40025	ptriretrop40025	1	117280346	117280696	+	ENSGALP00000014264	ENSGALG00000008782	Un_random	0.735	NA
ptriretrop40036	ptriretrop40036	1	117499023	117499697	+	ENSPPYP00000023484	ENSPPYG00000025855	12	0.85	NA
ptriretrop40040	ptriretrop40040	1	117582872	117583621	+	ENSP00000422994	ENSG00000145425	4	0.908	NA
ptr_retrop10579	ptr_retrop10579	1	117622712	117623419	+	ENSPTRP00000047264	ENSPTRG00000022269	X	0.846	0.0899
ptr_retrop10583	ptr_retrop10583	1	119067466	119068319	+	ENSPTRP00000053176	ENSPTRG00000020205	8	0.585	2.6036
ptr_retrom10240	ptr_retrom10240	1	119164587	119165019	-	ENSPTRP00000015696	ENSPTRG00000009220	17	0.795	0.3663
ptr_retrom10242	ptr_retrom10242	1	119583470	119583847	-	ENSPTRP00000013350	ENSPTRG00000007823	16	0.795	0.1981
ptriretrom39161	ENSPTRT00000065989	1	119925204	119925719	-	ENSP00000431872	ENSG00000133112	13	0.994	NA
ptr_retrop10584	ptr_retrop10584	1	120019591	120020591	+	ENSPTRP00000007822	ENSPTRG00000004577	12	0.821	0.1942
ptr_retrop10586	ptr_retrop10586	1	120202858	120203867	+	ENSPTRP00000008902	ENSPTRG00000028747	11	0.9	0.0958
ptriretrop40100	ptriretrop40100	1	120887382	120887760	+	ENSOANP00000021620	ENSOANG00000013708	Contig30988	0.898	NA
ptr_retrom10247	ptr_retrom10247	1	121181923	121182751	-	ENSPTRP00000029810	ENSPTRG00000017451	5	0.652	13.0612
ptriretrom39185	ptriretrom39185	1	122293543	122294358	-	ENSPPYP00000012209	ENSPPYG00000010933	20	0.745	NA
ptr_retrom10253	ptr_retrom10253	1	122302856	122303284	-	ENSPTRP00000014891	ENSPTRG00000008742	17	0.786	0.1641
ptr_retrom10256	ptr_retrom10256	1	123590821	123591210	-	ENSPTRP00000017340	ENSPTRG00000010200	19	0.885	0.396
ptr_retrom10257	ptr_retrom10257	1	123622062	123622479	-	ENSPTRP00000018953	ENSPTRG00000011037	19	0.834	0.0995
ptr_retrom10259	ptr_retrom10259	1	123884167	123885165	-	ENSPTRP00000000465	ENSPTRG00000000265	1	0.79	0.2641
ptr_retrom10260	ptr_retrom10260	1	123974809	123975116	-	ENSPTRP00000047641	ENSPTRG00000004288	11	0.65	0.3606
ptriretrom39231	ptriretrom39231	1	124063867	124064244	-	ENSP00000219169	ENSG00000102898	16	0.874	NA
ptr_retrom10263	ptr_retrom10263	1	124458342	124458658	-	ENSPTRP00000036292	ENSPTRG00000021245	9	0.694	0.3561
ptr_retrop10595	ptr_retrop10595	1	125173025	125174015	+	ENSPTRP00000008508	ENSPTRG00000004996	12	0.84	0.1628
ptr_retrop10596	ptr_retrop10596	1	125995577	125996218	+	ENSPTRP00000055273	ENSPTRG00000002539	10	0.949	0.0197
ptr_retrom10269	ptr_retrom10269	1	126585673	126585870	-	ENSPTRP00000021017	ENSPTRG00000012267	2A	0.726	0.2016
ptr_retrop10616	ptr_retrop10616	1	127040502	127040857	+	ENSPTRP00000047122	ENSPTRG00000019637	7	0.684	0.2733
ptr_retrop10619	ENSPTRT00000058786	1	127195365	127195853	+	ENSPTRP00000042839	ENSPTRG00000023064	7	0.865	0.1231
ptriretrop40235	ptriretrop40235	1	127697674	127698082	+	ENSMUSP00000018437	ENSMUSG00000018293	11	0.727	NA
ptr_retrom10281	ptr_retrom10281	1	127923228	127923634	-	ENSPTRP00000029578	ENSPTRG00000017303	5	0.714	5.4633
ptriretrom39332	ENSPTRT00000055780	1	127982873	127983280	-	ENSGGOP00000019458	ENSGGOG00000022928	5	0.971	NA
ptriretrom39341	ENSPTRT00000002295	1	128011633	128012040	-	ENSGGOP00000019458	ENSGGOG00000022928	5	0.971	NA
ptr_retrop10677	ptr_retrop10677	1	128755286	128756090	+	ENSPTRP00000005810	ENSPTRG00000003326	11	0.835	0.1821
ptr_retrop10678	ptr_retrop10678	1	128961758	128962066	+	ENSPTRP00000028257	ENSPTRG00000016460	4	0.818	0.0977
ptriretrom39396	ptriretrom39396	1	129063239	129063577	-	ENSMMUP00000020417	ENSMMUG00000015563	13	0.817	NA
ptriretrom39431	ptriretrom39431	1	130325321	130325993	-	ENSP00000370467	ENSG00000130021	X	0.791	NA
ptriretrop40369	ptriretrop40369	1	130609013	130609186	+	ENSP00000275036	ENSG00000118418	6	0.897	NA
ptriretrop40383	ptriretrop40383	1	131451012	131451789	+	ENSMUSP00000083705	ENSMUSG00000067274	5	0.813	NA
ptr_retrop10690	ptr_retrop10690	1	132246333	132246658	+	ENSPTRP00000039611	ENSPTRG00000016353	4	0.809	0.0612
ptr_retrom10413	ptr_retrom10413	1	132628743	132629627	-	ENSPTRP00000025475	ENSPTRG00000022841	3	0.953	0.0527
ptr_retrom10414	ptr_retrom10414	1	132667221	132668007	-	ENSPTRP00000018723	ENSPTRG00000010926	19	0.871	0.1996
ptr_retrop10695	ptr_retrop10695	1	133686711	133687669	+	ENSPTRP00000030631	ENSPTRG00000017953	6	0.953	0.0473
ptr_retrop10696	ptr_retrop10696	1	134097182	134098015	+	ENSPTRP00000014246	ENSPTRG00000008343	16	0.763	0.1953
ptr_retrom10424	ptr_retrom10424	1	135364354	135365888	-	ENSPTRP00000035660	ENSPTRG00000020853	9	0.955	0.0423
ptr_retrop10705	ptr_retrop10705	1	135378318	135379818	+	ENSPTRP00000008490	ENSPTRG00000020404	12	0.604	3.4585
ptr_retrom10426	ptr_retrom10426	1	136039075	136039877	-	ENSPTRP00000029484	ENSPTRG00000017235	5	0.672	0.4085
ptr_retrom10427	ptr_retrom10427	1	136495687	136497567	-	ENSPTRP00000029254	ENSPTRG00000017090	5	0.927	0.0272
ptriretrom39594	ptriretrom39594	1	136522672	136523057	-	ENSOANP00000023276	ENSOANG00000014778	Contig9439	0.86	NA
ptr_retrop10709	ptr_retrop10709	1	136777772	136778791	+	ENSPTRP00000047576	ENSPTRG00000004444	11	0.888	0.0687
ptr_retrop10723	ptr_retrop10723	1	136848576	136850739	+	ENSPTRP00000058433	ENSPTRG00000006736	14	0.87	0.121
ptr_retrop10748	ptr_retrop10748	1	138095076	138095492	+	ENSPTRP00000015712	ENSPTRG00000009232	17	0.75	0.337
ptr_retrop10749	ptr_retrop10749	1	138361384	138361812	+	ENSPTRP00000005825	ENSPTRG00000003333	11	0.718	0.1695
ptr_retrom10507	ptr_retrom10507	1	138607027	138607875	-	ENSPTRP00000025475	ENSPTRG00000022841	3	0.936	0.0515
ptriretrop40657	ENSPTRT00000073616	1	138655495	138655788	+	ENSGALP00000013729	ENSGALG00000008435	7	0.959	NA
ptriretrop40671	ptriretrop40671	1	139014542	139015216	+	ENSGALP00000007476	ENSGALG00000004701	17	0.792	NA
ptr_retrop10762	ptr_retrop10762	1	139191538	139192029	+	ENSPTRP00000042839	ENSPTRG00000023064	7	0.75	0.2228
ptriretrop40705	ptriretrop40705	1	139752417	139753028	+	ENSPPYP00000007896	ENSPPYG00000006975	16	0.946	NA
ptr_retrom10509	ptr_retrom10509	1	139757514	139757701	-	ENSPTRP00000053460	ENSPTRG00000005933	13	0.737	0.1934
ptriretrom39804	ptriretrom39804	1	139935739	139936100	-	ENSGALP00000027030	ENSGALG00000016775	1	0.884	NA
ptr_retrom10513	ENSPTRT00000073598	1	140078043	140079269	-	ENSPTRP00000021742	ENSPTRG00000012717	2B	0.99	0.0066
ptr_retrop10763	ptr_retrop10763	1	140144535	140145272	+	ENSPTRP00000015706	ENSPTRG00000009225	17	0.539	9.7286
ptriretrom39822	ptriretrom39822	1	140805128	140805412	-	ENSPPYP00000021046	ENSPPYG00000018763	8	0.713	NA
ptriretrom39830	ptriretrom39830	1	141252786	141253025	-	ENSP00000417656	ENSG00000131174	X	0.762	NA
ptriretrop40735	ptriretrop40735	1	142650754	142651139	+	ENSP00000385131	ENSG00000173614	1	0.794	NA
ptr_retrop10766	ptr_retrop10766	1	142665217	142665689	+	ENSPTRP00000038541	ENSPTRG00000022371	X	0.943	0.039
ptriretrop40750	ptriretrop40750	1	143836725	143837227	+	ENSP00000302114	ENSG00000169230	5	0.669	NA
ptriretrop40762	ptriretrop40762	1	143921772	143922507	+	ENSPPYP00000007896	ENSPPYG00000006975	16	0.882	NA
ptriretrop40764	ptriretrop40764	1	144025161	144025633	+	ENSGALP00000009821	ENSGALG00000006096	5	0.816	NA
ptr_retrop10768	ptr_retrop10768	1	144030197	144030664	+	ENSPTRP00000009758	ENSPTRG00000005728	13	0.822	0.1573
ptr_retrop10770	ptr_retrop10770	1	144174910	144175344	+	ENSPTRP00000014891	ENSPTRG00000008742	17	0.897	0.0692
ptriretrop40791	ptriretrop40791	1	144377151	144377956	+	ENSMMUP00000039579	ENSMMUG00000021821	1099214456047	0.864	NA
ptr_retrop10774	ptr_retrop10774	1	145109079	145109909	+	ENSPTRP00000060165	ENSPTRG00000007195	15	0.888	0.0777
ptr_retrop10775	ptr_retrop10775	1	145149101	145149924	+	ENSPTRP00000001688	ENSPTRG00000000979	1	0.548	7.342
ptriretrop40817	ptriretrop40817	1	145224989	145225315	+	ENSOANP00000020461	ENSOANG00000012936	Ultra375	0.764	NA
ptriretrom39852	ptriretrom39852	1	145520660	145521089	-	ENSP00000346046	ENSG00000182774	15	0.825	NA
ptr_retrop10781	ptr_retrop10781	1	145889014	145889853	+	ENSPTRP00000033814	ENSPTRG00000019740	7	0.755	0.1515
ptr_retrop10784	ptr_retrop10784	1	145962858	145963216	+	ENSPTRP00000030810	ENSPTRG00000018039	6	0.713	0.2217
ptr_retrop10785	ptr_retrop10785	1	146587154	146587504	+	ENSPTRP00000039611	ENSPTRG00000016353	4	0.872	0.0829
ptr_retrop10786	ptr_retrop10786	1	146591954	146592129	+	ENSPTRP00000032349	ENSPTRG00000018934	7	0.678	0.0465
ptr_retrop10787	ptr_retrop10787	1	146743352	146743896	+	ENSPTRP00000013474	ENSPTRG00000007891	16	0.901	0.1303
ptr_retrom10525	ptr_retrom10525	1	146830920	146832461	-	ENSPTRP00000031534	ENSPTRG00000018462	6	0.826	0.1377
ptriretrom39872	ptriretrom39872	1	146962224	146962883	-	ENSP00000361076	ENSG00000148303	9	0.794	NA
ptriretrop40864	ptriretrop40864	1	147291732	147292025	+	ENSGALP00000013729	ENSGALG00000008435	7	0.816	NA
ptriretrop40871	ptriretrop40871	1	147332089	147332277	+	ENSGALP00000033891	ENSGALG00000001454	12	0.921	NA
ptriretrom39884	ptriretrom39884	1	148784583	148785466	-	ENSPPYP00000006423	ENSPPYG00000005651	14	0.869	NA
ptr_retrom10530	ptr_retrom10530	1	149696711	149697231	-	ENSPTRP00000028484	ENSPTRG00000016597	4	0.759	2.5634
ptr_retrop10793	ptr_retrop10793	1	149827084	149827564	+	ENSPTRP00000029783	ENSPTRG00000017431	5	0.696	0.2309
ptr_retrom10533	ptr_retrom10533	1	150116656	150117046	-	ENSPTRP00000014707	ENSPTRG00000008616	17	0.885	0.0721
ptr_retrom10536	ptr_retrom10536	1	150129925	150130760	-	ENSPTRP00000060165	ENSPTRG00000007195	15	0.878	0.1139
ptr_retrop10794	ptr_retrop10794	1	151212703	151213642	+	ENSPTRP00000025473	ENSPTRG00000014772	3	0.888	0.0517
ptr_retrom10538	ptr_retrom10538	1	151600337	151601523	-	ENSPTRP00000013976	ENSPTRG00000008185	16	0.86	NA
ptr_retrom10540	ptr_retrom10540	1	151714202	151714798	-	ENSPTRP00000031053	ENSPTRG00000018175	6	0.975	0.0042
ptr_retrop10796	ptr_retrop10796	1	151822434	151822739	+	ENSPTRP00000014891	ENSPTRG00000008742	17	0.882	0.1206
ptr_retrom10541	ptr_retrom10541	1	151833151	151834443	-	ENSPTRP00000007215	ENSPTRG00000004194	11	0.8	0.1673
ptriretrom39947	NA	1	152577139	152577465	-	ENSMMUP00000026408	ENSMMUG00000020073	8	0.786	NA
ptr_retrom10543	ptr_retrom10543	1	152847968	152848902	-	ENSPTRP00000027177	ENSPTRG00000015796	3	0.746	0.3231
ptriretrom39968	ptriretrom39968	1	153340845	153341343	-	ENSP00000358272	ENSG00000123545	6	0.794	NA
ptr_retrom10548	ptr_retrom10548	1	153541238	153542156	-	ENSPTRP00000046911	ENSPTRG00000021555	9	0.938	0.0761
ptr_retrom10549	ptr_retrom10549	1	154746584	154747215	-	ENSPTRP00000014462	ENSPTRG00000008480	16	0.758	0.4631
ptr_retrom10551	ptr_retrom10551	1	155130884	155131396	-	ENSPTRP00000031296	ENSPTRG00000018314	GL390389.1	0.86	0.0637
ptriretrom40013	ptriretrom40013	1	157261400	157262499	-	ENSP00000372822	ENSG00000175354	18	0.933	NA
ptr_retrop10807	ptr_retrop10807	1	157690695	157691337	+	ENSPTRP00000036650	ENSPTRG00000021436	9	0.803	0.256
ptr_retrop10808	ptr_retrop10808	1	157762929	157763212	+	ENSPTRP00000021006	ENSPTRG00000012257	2A	0.642	0.191
ptriretrom40036	ptriretrom40036	1	157967942	157968472	-	ENSOANP00000021620	ENSOANG00000013708	Contig30988	0.912	NA
ptr_retrom10562	ptr_retrom10562	1	158180201	158180680	-	ENSPTRP00000009758	ENSPTRG00000005728	13	0.994	0.0175
ptr_retrop10810	ptr_retrop10810	1	158480483	158481301	+	ENSPTRP00000025475	ENSPTRG00000022841	3	0.815	0.1749
ptriretrop41014	ptriretrop41014	1	158951607	158952061	+	ENSP00000390129	ENSG00000213585	5	0.865	NA
ptr_retrop10813	ptr_retrop10813	1	160885541	160885870	+	ENSPTRP00000015627	ENSPTRG00000009175	17	0.946	0.121
ptr_retrom10572	ptr_retrom10572	1	161514933	161515229	-	ENSPTRP00000053956	ENSPTRG00000031426	21	0.95	0.089
ptr_retrom10574	ptr_retrom10574	1	161533465	161534750	-	ENSPTRP00000008508	ENSPTRG00000004996	12	0.853	0.1268
ptr_retrop10814	ptr_retrop10814	1	161563933	161564229	+	ENSPTRP00000060206	ENSPTRG00000014802	3	0.755	0.0978
ptriretrop41044	ptriretrop41044	1	161848496	161849152	+	ENSP00000424547	ENSG00000145425	4	0.71	NA
ptr_retrop10818	ptr_retrop10818	1	163175699	163177045	+	ENSPTRP00000047344	ENSPTRG00000023413	X	0.763	0.1501
ptriretrom40123	ptriretrom40123	1	163690129	163690522	-	ENSMODP00000009409	ENSMODG00000007582	5	0.588	NA
ptr_retrom10576	ptr_retrom10576	1	163845961	163846853	-	ENSPTRP00000001659	ENSPTRG00000000963	1	0.875	0.0718
ptr_retrom10580	ptr_retrom10580	1	163956375	163956740	-	ENSPTRP00000014400	ENSPTRG00000008445	16	0.659	0.468
ptriretrom40148	ptriretrom40148	1	165203628	165204306	-	ENSMMUP00000023250	ENSMMUG00000017670	5	0.689	NA
ptr_retrop10819	ptr_retrop10819	1	166171331	166172475	+	ENSPTRP00000002407	ENSPTRG00000001422	1	0.806	0.1432
ptr_retrom10582	ptr_retrom10582	1	166320836	166321904	-	ENSPTRP00000045313	ENSPTRG00000012794	2B	0.653	0.2672
ptriretrop41065	ptriretrop41065	1	167320075	167320661	+	ENSMODP00000001156	ENSMODG00000000969	5	0.712	NA
ptr_retrom10583	ptr_retrom10583	1	167759391	167760283	-	ENSPTRP00000007822	ENSPTRG00000004577	12	0.676	0.418
ptriretrom40169	ptriretrom40169	1	168593276	168595905	-	ENSPPYP00000017284	ENSPPYG00000015468	5	0.808	NA
ptriretrop41075	ptriretrop41075	1	169412791	169413222	+	ENSMMUP00000017189	ENSMMUG00000013088	20	0.67	NA
ptriretrom40175	ptriretrom40175	1	169763969	169764318	-	ENSOANP00000021620	ENSOANG00000013708	Contig30988	0.889	NA
ptr_retrop10821	ptr_retrop10821	1	171438580	171439035	+	ENSPTRP00000020014	ENSPTRG00000011637	2A	0.778	0.1821
ptr_retrop10824	ptr_retrop10824	1	172847530	172848867	+	ENSPTRP00000045593	ENSPTRG00000018347	6	0.823	0.0995
ptriretrop41097	ptriretrop41097	1	173390139	173390450	+	ENSMUSP00000119555	ENSMUSG00000062580	1	0.819	NA
ptriretrop41103	ptriretrop41103	1	175919482	175920464	+	ENSP00000440459	ENSG00000182220	X	0.88	NA
ptriretrop41117	ptriretrop41117	1	176398824	176399590	+	ENSMODP00000030006	ENSMODG00000018533	2	0.7	NA
ptr_retrom10587	ptr_retrom10587	1	176450406	176451100	-	ENSPTRP00000005263	ENSPTRG00000002984	10	0.866	0.0932
ptr_retrom10588	ptr_retrom10588	1	177399902	177400367	-	ENSPTRP00000009358	ENSPTRG00000005512	12	0.815	0.248
ptriretrop41129	ptriretrop41129	1	177675574	177676229	+	ENSP00000341885	ENSG00000140988	16	0.89	NA
ptriretrop41139	ptriretrop41139	1	178105835	178106176	+	ENSOANP00000015173	ENSOANG00000009558	Ultra497	0.727	NA
ptr_retrop10829	ptr_retrop10829	1	178121036	178122273	+	ENSPTRP00000045593	ENSPTRG00000018347	6	0.776	0.2511
ptr_retrop10830	ptr_retrop10830	1	178480342	178480735	+	ENSPTRP00000034976	ENSPTRG00000020457	8	0.765	0.3278
ptr_retrop10831	ptr_retrop10831	1	178605821	178606051	+	ENSPTRP00000032349	ENSPTRG00000018934	7	0.727	0.1495
ptriretrop41165	ptriretrop41165	1	178947513	178948163	+	ENSP00000384396	ENSG00000147382	X	0.912	NA
ptr_retrop10835	ptr_retrop10835	1	179065343	179065732	+	ENSPTRP00000004744	ENSPTRG00000003895	11	0.656	0.4556
ptr_retrop10836	ptr_retrop10836	1	179613669	179614010	+	ENSPTRP00000039611	ENSPTRG00000016353	4	0.886	0.0983
ptriretrop41193	ptriretrop41193	1	180193481	180193784	+	ENSMMUP00000017005	ENSMMUG00000012956	X	0.835	NA
ptriretrop41224	ptriretrop41224	1	181223804	181224656	+	ENSMMUP00000012534	ENSMMUG00000009587	19	0.855	NA
ptr_retrop10840	ptr_retrop10840	1	181589558	181590622	+	ENSPTRP00000015771	ENSPTRG00000009272	17	0.689	0.4166
ptr_retrop10841	ptr_retrop10841	1	181668013	181668969	+	ENSPTRP00000039339	ENSPTRG00000018890	7	0.656	1.1983
ptriretrop41246	ptriretrop41246	1	181710658	181711032	+	ENSOANP00000021620	ENSOANG00000013708	Contig30988	0.912	NA
ptriretrop41252	ptriretrop41252	1	181799865	181800143	+	ENSGALP00000023266	ENSGALG00000014432	2	0.66	NA
ptr_retrom10600	ptr_retrom10600	1	182475375	182476165	-	ENSPTRP00000029097	ENSPTRG00000016990	5	0.864	0.0999
ptr_retrom10601	ptr_retrom10601	1	182629837	182630469	-	ENSPTRP00000035664	ENSPTRG00000020857	9	0.805	0.1986
ptriretrom40314	ptriretrom40314	1	182700614	182701402	-	ENSP00000448048	ENSG00000170421	12	0.762	NA
ptriretrom40319	ptriretrom40319	1	182732904	182733098	-	ENSMODP00000015398	ENSMODG00000012295	4	0.908	NA
ptriretrom40334	ENSPTRT00000019605	1	182768922	182769308	-	ENSP00000389103	ENSG00000198242	17	1	NA
ptr_retrop10848	ptr_retrop10848	1	183016372	183016812	+	ENSPTRP00000009139	ENSPTRG00000005381	12	0.688	0.3001
ptr_retrom10609	ptr_retrom10609	1	183181274	183181753	-	ENSPTRP00000009758	ENSPTRG00000005728	13	0.95	0.0216
ptriretrop41300	ptriretrop41300	1	183984589	183984879	+	ENSPPYP00000015441	ENSPPYG00000013798	3	0.701	NA
ptr_retrop10849	ENSPTRT00000074238	1	184207445	184207666	+	ENSPTRP00000020652	ENSPTRG00000012029	2A	0.986	0.0176
ptr_retrom10619	ptr_retrom10619	1	185260755	185261068	-	ENSPTRP00000026873	ENSPTRG00000015620	3	0.657	11.4624
ptriretrop41317	ptriretrop41317	1	185625906	185626595	+	ENSGGOP00000014087	ENSGGOG00000014442	9	0.93	NA
ptr_retrom10623	ptr_retrom10623	1	185794154	185794563	-	ENSPTRP00000029765	ENSPTRG00000017418	5	0.864	0.0985
ptr_retrop10855	ptr_retrop10855	1	186008633	186009238	+	ENSPTRP00000019396	ENSPTRG00000011298	19	0.847	0.0871
ptriretrop41340	ptriretrop41340	1	188329112	188330283	+	ENSP00000364519	ENSG00000198176	13	0.846	NA
ptr_retrom10628	ptr_retrom10628	1	188363210	188363653	-	ENSPTRP00000008549	ENSPTRG00000005023	12	0.899	0.1556
ptr_retrop10859	ptr_retrop10859	1	189391804	189392656	+	ENSPTRP00000019974	ENSPTRG00000011614	2A	0.741	0.2695
ptr_retrop10860	ptr_retrop10860	1	190276029	190276340	+	ENSPTRP00000007472	ENSPTRG00000004361	11	0.923	0.0538
ptriretrop41383	ptriretrop41383	1	190311916	190312572	+	ENSP00000302114	ENSG00000169230	5	0.959	NA
ptriretrop41387	ptriretrop41387	1	190567543	190568009	+	ENSPPYP00000005645	ENSPPYG00000004947	12	0.911	NA
ptr_retrom10630	ptr_retrom10630	1	190776401	190777478	-	ENSPTRP00000002407	ENSPTRG00000001422	1	0.831	0.1584
ptriretrom40474	ptriretrom40474	1	191425676	191426062	-	ENSP00000389103	ENSG00000198242	17	0.961	NA
ptr_retrop10864	ptr_retrop10864	1	191771658	191772010	+	ENSPTRP00000035961	ENSPTRG00000021036	9	0.805	0.2812
ptr_retrom10635	ptr_retrom10635	1	191979757	191979906	-	ENSPTRP00000061334	ENSPTRG00000040141	19	0.704	0.571
ptriretrom40494	ptriretrom40494	1	192556732	192557088	-	ENSGGOP00000026272	ENSGGOG00000006432	2a	0.661	NA
ptr_retrom10639	ptr_retrom10639	1	193637006	193637584	-	ENSPTRP00000029350	ENSPTRG00000017155	5	0.953	0.0528
ptr_retrop10866	ptr_retrop10866	1	193686582	193687634	+	ENSPTRP00000008508	ENSPTRG00000004996	12	0.814	0.1898
ptr_retrom10642	ptr_retrom10642	1	193768390	193768823	-	ENSPTRP00000034647	ENSPTRG00000020231	8	0.741	3.4587
ptr_retrop10867	ptr_retrop10867	1	194025967	194026949	+	ENSPTRP00000007822	ENSPTRG00000004577	12	0.756	0.4532
ptr_retrop10868	ptr_retrop10868	1	194533033	194533901	+	ENSPTRP00000029484	ENSPTRG00000017235	5	0.724	NA
ptriretrom40523	ptriretrom40523	1	197036665	197036895	-	ENSP00000408482	ENSG00000143947	2	0.895	NA
ptr_retrom10643	ptr_retrom10643	1	198397279	198398065	-	ENSPTRP00000007924	ENSPTRG00000004643	12	0.717	0.2504
ptr_retrom10646	ptr_retrom10646	1	199325520	199325909	-	ENSPTRP00000013350	ENSPTRG00000007823	16	0.931	0.0759
ptr_retrop10871	ENSPTRT00000066917	1	199415650	199416096	+	ENSPTRP00000042964	ENSPTRG00000024222	4	1	0.0066
ptr_retrom10649	ptr_retrom10649	1	199467425	199468632	-	ENSPTRP00000023475	ENSPTRG00000013646	20	0.911	0.0628
ptriretrom40568	ptriretrom40568	1	199533797	199535373	-	ENSP00000384941	ENSG00000196419	22	0.791	NA
ptriretrom40578	ptriretrom40578	1	199536665	199537408	-	ENSGALP00000011717	ENSGALG00000023294	15	0.822	NA
ptr_retrop10873	ptr_retrop10873	1	199688464	199688965	+	ENSPTRP00000023537	ENSPTRG00000013682	20	0.841	0.1442
ptriretrop41481	NA	1	199850086	199850772	+	ENSMUSP00000101149	ENSMUSG00000019777	10	0.723	NA
ptriretrom40589	ptriretrom40589	1	200779468	200780252	-	ENSMMUP00000018634	ENSMMUG00000014187	11	0.621	NA
ptriretrom40599	ptriretrom40599	1	201712653	201714678	-	ENSGGOP00000020986	ENSGGOG00000027998	3	0.604	NA
ptr_retrom10670	ptr_retrom10670	1	201908292	201908618	-	ENSPTRP00000008528	ENSPTRG00000005010	12	0.853	0.1494
ptr_retrom10671	ptr_retrom10671	1	202958222	202958493	-	ENSPTRP00000051301	ENSPTRG00000030224	1	0.772	0.0664
ptr_retrom10672	ptr_retrom10672	1	203171473	203172278	-	ENSPTRP00000015927	ENSPTRG00000009376	17	0.901	0.129
ptr_retrom10678	ptr_retrom10678	1	203178630	203179752	-	ENSPTRP00000039339	ENSPTRG00000018890	7	0.87	0.3062
ptr_retrop10879	ptr_retrop10879	1	203467469	203467828	+	ENSPTRP00000009758	ENSPTRG00000005728	13	0.75	0.1541
ptr_retrop10884	ptr_retrop10884	1	203749781	203750728	+	ENSPTRP00000033770	ENSPTRG00000019716	7	0.867	0.2492
ptr_retrop10885	ptr_retrop10885	1	205132755	205132985	+	ENSPTRP00000048498	ENSPTRG00000028890	19	0.792	0.3986
ptr_retrom10679	ptr_retrom10679	1	205367571	205367921	-	ENSPTRP00000039611	ENSPTRG00000016353	4	0.795	0.1132
ptriretrop41554	ptriretrop41554	1	205621054	205621828	+	ENSMMUP00000039579	ENSMMUG00000021821	1099214456047	0.863	NA
ptr_retrop10888	ptr_retrop10888	1	206621064	206621388	+	ENSPTRP00000030810	ENSPTRG00000018039	6	0.755	0.1657
ptr_retrom10684	ptr_retrom10684	1	207257668	207258126	-	ENSPTRP00000012231	ENSPTRG00000007153	15	0.818	0.1017
ptr_retrom10685	ptr_retrom10685	1	207280049	207280213	-	ENSPTRP00000061334	ENSPTRG00000040141	19	0.745	0.5528
ptriretrom40704	ptriretrom40704	1	207603165	207603621	-	ENSMUSP00000099541	ENSMUSG00000058546	11	0.854	NA
ptr_retrop10924	ptr_retrop10924	1	207787143	207787553	+	ENSPTRP00000019324	ENSPTRG00000011268	19	0.535	3.6895
ptriretrop41627	ENSPTRT00000003817	1	207843290	207843745	+	ENSGGOP00000025053	ENSGGOG00000024439	1	0.577	NA
ptr_retrop10927	ptr_retrop10927	1	208143976	208144467	+	ENSPTRP00000036025	ENSPTRG00000021075	9	0.789	0.1314
ptriretrop41640	ptriretrop41640	1	208675931	208676203	+	ENSGGOP00000000955	ENSGGOG00000000971	1	0.868	NA
ptr_retrom10726	ptr_retrom10726	1	208796763	208797616	-	ENSPTRP00000029983	ENSPTRG00000017558	5	0.843	0.138
ptr_retrom10729	ptr_retrom10729	1	208812998	208813477	-	ENSPTRP00000028484	ENSPTRG00000016597	4	0.698	2.568
ptriretrop41652	ENSPTRT00000075357	1	210139404	210139973	+	ENSP00000426503	ENSG00000063978	4	0.942	NA
ptr_retrom10733	ptr_retrom10733	1	210239675	210240203	-	ENSPTRP00000042839	ENSPTRG00000023064	7	0.798	0.1536
ptr_retrom10737	ptr_retrom10737	1	212438897	212439478	-	ENSPTRP00000019976	ENSPTRG00000011615	2A	0.938	0.0678
ptriretrom40781	ptriretrom40781	1	213004808	213005144	-	ENSP00000272065	ENSG00000143727	2	0.83	NA
ptriretrom40787	ptriretrom40787	1	213195792	213196152	-	ENSP00000403778	ENSG00000128340	22	0.681	NA
ptriretrop41669	ptriretrop41669	1	213456478	213457048	+	ENSP00000400467	ENSG00000163682	4	0.653	NA
ptr_retrom10739	ptr_retrom10739	1	213528030	213528416	-	ENSPTRP00000017340	ENSPTRG00000010200	19	0.922	0.2006
ptr_retrop10935	ptr_retrop10935	1	214721593	214721832	+	ENSPTRP00000023600	ENSPTRG00000013708	20	0.662	0.2122
ptriretrop41708	NA	1	214910747	214911749	+	ENSPPYP00000020643	ENSPPYG00000018421	8	0.68	NA
ptr_retrop10940	ptr_retrop10940	1	215035359	215036417	+	ENSPTRP00000005957	ENSPTRG00000003421	11	0.878	0.1078
ptriretrop41724	ptriretrop41724	1	215413870	215416170	+	ENSPPYP00000013248	ENSPPYG00000011871	22	0.864	NA
ptr_retrop10944	ptr_retrop10944	1	215791528	215792828	+	ENSPTRP00000000207	ENSPTRG00000000109	1	0.882	0.1268
ptr_retrop10946	ptr_retrop10946	1	216133477	216134358	+	ENSPTRP00000025475	ENSPTRG00000022841	3	0.885	0.1575
ptr_retrop10947	ptr_retrop10947	1	216298546	216298830	+	ENSPTRP00000036507	ENSPTRG00000021361	9	0.884	0.0199
ptr_retrop10950	ptr_retrop10950	1	217237547	217238315	+	ENSPTRP00000058292	ENSPTRG00000018890	7	0.805	1.0604
ptr_retrom10744	ptr_retrom10744	1	217386047	217386808	-	ENSPTRP00000000611	ENSPTRG00000000350	1	0.773	0.1257
ptr_retrop10951	ptr_retrop10951	1	217810573	217811502	+	ENSPTRP00000008508	ENSPTRG00000004996	12	0.848	0.1638
ptr_retrop10955	ptr_retrop10955	1	219288931	219290420	+	ENSPTRP00000028865	ENSPTRG00000016845	5	0.793	0.167
ptr_retrop10957	ptr_retrop10957	1	219328325	219328897	+	ENSPTRP00000019976	ENSPTRG00000011615	2A	0.838	0.1924
ptr_retrom10748	ptr_retrom10748	1	219461283	219463991	-	ENSPTRP00000026991	ENSPTRG00000015689	3	0.917	0.0764
ptr_retrop10961	ptr_retrop10961	1	219489190	219490050	+	ENSPTRP00000028003	ENSPTRG00000016303	4	0.889	0.0823
ptr_retrom10752	ptr_retrom10752	1	219968078	219968533	-	ENSPTRP00000019397	ENSPTRG00000011299	19	0.771	0.1793
ptr_retrop10962	ptr_retrop10962	1	219985633	219986143	+	ENSPTRP00000017830	ENSPTRG00000010465	19	0.694	0.317
ptr_retrom10755	ptr_retrom10755	1	220160496	220160869	-	ENSPTRP00000035961	ENSPTRG00000021036	9	0.808	0.1566
ptriretrop41808	ptriretrop41808	1	220257354	220257731	+	ENSOANP00000021620	ENSOANG00000013708	Contig30988	0.89	NA
ptriretrom40879	ptriretrom40879	1	220655899	220656177	-	ENSGGOP00000014989	ENSGGOG00000015365	19	0.684	NA
ptr_retrom10757	ptr_retrom10757	1	220988751	220990706	-	ENSPTRP00000037969	ENSPTRG00000022071	X	0.718	0.7577
ptriretrop41818	ptriretrop41818	1	221191771	221192448	+	ENSP00000403172	ENSG00000089009	12	0.867	NA
ptriretrop41826	ptriretrop41826	1	221195206	221195883	+	ENSP00000403172	ENSG00000089009	12	0.871	NA
ptr_retrop10966	ptr_retrop10966	1	221324481	221325758	+	ENSPTRP00000046569	ENSPTRG00000022819	17	0.563	1.2092
ptr_retrop10967	ptr_retrop10967	1	221730458	221730988	+	ENSPTRP00000030891	ENSPTRG00000018085	6	0.808	0.3434
ptr_retrop10968	ptr_retrop10968	1	222143738	222144207	+	ENSPTRP00000012123	ENSPTRG00000007094	15	0.854	0.1092
ptr_retrom10761	ptr_retrom10761	1	222660154	222660615	-	ENSPTRP00000011102	ENSPTRG00000006540	14	0.877	0.0641
ptr_retrom10764	ptr_retrom10764	1	223021917	223022236	-	ENSPTRP00000031694	ENSPTRG00000018564	6	0.783	0.2547
ptr_retrom10768	ptr_retrom10768	1	224103960	224104220	-	ENSPTRP00000059851	ENSPTRG00000016822	5	0.875	0.0637
ptriretrom40948	ENSPTRT00000062038	1	224655427	224656272	-	ENSMMUP00000017257	ENSMMUG00000013136	1	0.986	NA
ptr_retrop10971	ptr_retrop10971	1	226527477	226528710	+	ENSPTRP00000041095	ENSPTRG00000022987	12	0.84	0.1008
ptriretrop41887	ptriretrop41887	1	226658522	226658770	+	ENSGALP00000012928	ENSGALG00000007971	18	0.605	NA
ptriretrom40964	ptriretrom40964	1	226667224	226668839	-	ENSP00000379877	ENSG00000139197	12	0.798	NA
ptr_retrop10980	ptr_retrop10980	1	226713067	226714958	+	ENSPTRP00000007540	ENSPTRG00000004404	11	0.872	0.1617
ptr_retrop11024	ptr_retrop11024	1	227319071	227320035	+	ENSPTRP00000004166	ENSPTRG00000002435	1	0.788	0.1463
ptriretrom41035	NA	1	227425220	227425960	-	ENSGALP00000039184	ENSGALG00000001362	10	0.612	NA
ptriretrop42170	ENSPTRT00000026104	1	228064103	228064457	+	ENSP00000330343	ENSG00000184900	21	1	NA
ptr_retrom05422	ptr_retrom05422	10	5388098	5388532	-	ENSPTRP00000014891	ENSPTRG00000008742	17	0.786	0.2127
ptr_retrop05221	ENSPTRT00000004138	10	5603399	5603845	+	ENSPTRP00000020427	ENSPTRG00000011901	2A	0.846	57.6164
ptr_retrop05222	ptr_retrop05222	10	5860005	5860766	+	ENSPTRP00000055273	ENSPTRG00000002539	10	0.823	0.1523
ptr_retrom05426	ptr_retrom05426	10	5946874	5947266	-	ENSPTRP00000038960	ENSPTRG00000022808	9	0.744	0.2447
ptriretrom18426	ptriretrom18426	10	6156437	6156803	-	ENSMMUP00000001790	ENSMMUG00000001340	2	0.616	NA
ptr_retrop05225	ptr_retrop05225	10	8259561	8260225	+	ENSPTRP00000041680	ENSPTRG00000000739	1	0.878	0.0546
ptr_retrom05431	ptr_retrom05431	10	8613739	8615004	-	ENSPTRP00000008491	ENSPTRG00000004979	12	0.595	107.566
ptr_retrop05226	ptr_retrop05226	10	8720411	8721076	+	ENSPTRP00000033763	ENSPTRG00000019711	7	0.811	0.096
ptr_retrom05433	ptr_retrom05433	10	10919441	10919882	-	ENSPTRP00000021773	ENSPTRG00000012736	2B	0.697	0.2873
ptr_retrom05435	ptr_retrom05435	10	13248073	13248821	-	ENSPTRP00000001659	ENSPTRG00000000963	1	0.888	0.1386
ptriretrom18486	ptriretrom18486	10	13351459	13351837	-	ENSP00000404375	ENSG00000241343	X	0.783	NA
ptr_retrom05438	ptr_retrom05438	10	13500777	13501071	-	ENSPTRP00000034873	ENSPTRG00000020385	8	0.758	0.1266
ptriretrom18494	ptriretrom18494	10	13794152	13794913	-	ENSP00000403172	ENSG00000089009	12	0.797	NA
ptriretrop18269	ptriretrop18269	10	14075873	14076220	+	ENSP00000219169	ENSG00000102898	16	0.629	NA
ptriretrom18500	ptriretrom18500	10	14952304	14953146	-	ENSGGOP00000014676	ENSGGOG00000015038	3	0.851	NA
ptriretrom18529	ptriretrom18529	10	15354644	15355421	-	ENSGALP00000016361	ENSGALG00000010077	4	0.811	NA
ptr_retrom05469	ptr_retrom05469	10	15593873	15594391	-	ENSPTRP00000042839	ENSPTRG00000023064	7	0.776	0.1416
ptr_retrom05470	ptr_retrom05470	10	15610360	15610602	-	ENSPTRP00000032349	ENSPTRG00000018934	7	0.741	0.0647
ptriretrop18300	ptriretrop18300	10	20655172	20655951	+	ENSMMUP00000000721	ENSMMUG00000000535	4	0.743	NA
ptriretrom18587	NA	10	21968803	21969912	-	ENSOANP00000006266	ENSOANG00000003961	Contig7223	0.844	NA
ptriretrom18596	ENSPTRT00000026297	10	21971706	21972293	-	ENSP00000384925	ENSG00000099901	22	1	NA
ptriretrop18312	ptriretrop18312	10	22610293	22610605	+	ENSGALP00000027030	ENSGALG00000016775	1	0.762	NA
ptr_retrop05238	ptr_retrop05238	10	23492050	23492778	+	ENSPTRP00000052121	ENSPTRG00000013529	20	0.872	46.066
ptriretrop18330	ptriretrop18330	10	23620631	23620965	+	ENSGALP00000000226	ENSGALG00000000171	22	0.653	NA
ptr_retrop05241	ptr_retrop05241	10	24544391	24545341	+	ENSPTRP00000021737	ENSPTRG00000012711	2B	0.831	0.1084
ptriretrom18630	ptriretrom18630	10	27734944	27735515	-	ENSMUSP00000028995	ENSMUSG00000027495	2	0.72	NA
ptr_retrop05245	ptr_retrop05245	10	28850290	28851119	+	ENSPTRP00000025475	ENSPTRG00000022841	3	0.835	0.1414
ptr_retrom05483	ptr_retrom05483	10	29331528	29332007	-	ENSPTRP00000009758	ENSPTRG00000005728	13	0.969	0.0218
ptr_retrom05484	ptr_retrom05484	10	30339370	30339775	-	ENSPTRP00000033880	ENSPTRG00000019778	7	0.765	0.3236
ptriretrop18385	ptriretrop18385	10	30837561	30838059	+	ENSP00000386449	ENSG00000155438	2	0.885	NA
ptriretrop18395	ptriretrop18395	10	32372708	32373047	+	ENSMUSP00000118733	ENSMUSG00000066551	5	0.743	NA
ptr_retrop05246	ptr_retrop05246	10	32445413	32445698	+	ENSPTRP00000039611	ENSPTRG00000016353	4	0.635	0.4502
ptr_retrom05493	ptr_retrom05493	10	32563461	32564231	-	ENSPTRP00000037867	ENSPTRG00000022025	X	0.88	0.0753
ptr_retrom05497	ptr_retrom05497	10	32645179	32645673	-	ENSPTRP00000042839	ENSPTRG00000023064	7	0.952	0.0158
ptr_retrom05498	ptr_retrom05498	10	32687436	32687828	-	ENSPTRP00000042761	ENSPTRG00000002666	10	0.871	0.1767
ptr_retrom05499	ENSPTRT00000075772	10	32961707	32962060	-	ENSPTRP00000055317	ENSPTRG00000023558	2A	0.983	0.0111
ptr_retrop05248	ENSPTRT00000010772	10	33352560	33353051	+	ENSPTRP00000061157	ENSPTRG00000042329	13	1	0.0056
ptriretrop18416	ptriretrop18416	10	33399336	33399800	+	ENSOANP00000002407	ENSOANG00000001505	X5	0.71	NA
ptriretrom18724	ptriretrom18724	10	33513750	33514436	-	ENSMUSP00000099962	ENSMUSG00000062647	2	0.908	NA
ptr_retrom05501	ptr_retrom05501	10	35150758	35151159	-	ENSPTRP00000031780	ENSPTRG00000018618	6	0.756	0.2804
ptriretrop18431	ENSPTRT00000072737	10	35352195	35352389	+	ENSP00000401115	ENSG00000008324	3	0.908	NA
ptriretrop18437	ptriretrop18437	10	35642949	35643280	+	ENSP00000363162	ENSG00000136888	9	0.706	NA
ptriretrop18450	ptriretrop18450	10	36194219	36194940	+	ENSGGOP00000021992	ENSGGOG00000008034	8	0.88	NA
ptr_retrom05504	ENSPTRT00000075217	10	37028297	37029712	-	ENSPTRP00000055668	ENSPTRG00000019571	7	0.981	0.0104
ptr_retrop05255	ptr_retrop05255	10	37526211	37526739	+	ENSPTRP00000013352	ENSPTRG00000007824	16	0.838	0.0966
ptr_retrop05256	ptr_retrop05256	10	37873375	37874665	+	ENSPTRP00000029207	ENSPTRG00000017064	5	0.872	0.0587
ptr_retrom05507	ptr_retrom05507	10	38357688	38359755	-	ENSPTRP00000016134	ENSPTRG00000009506	17	0.898	0.0841
ptr_retrom05508	ptr_retrom05508	10	38637841	38638125	-	ENSPTRP00000045861	ENSPTRG00000004329	11	0.758	0.2695
ptriretrop18496	ptriretrop18496	10	39290545	39292050	+	ENSP00000429594	ENSG00000070756	8	0.666	NA
ptr_retrop05260	ptr_retrop05260	10	39351552	39352772	+	ENSPTRP00000021215	ENSPTRG00000012388	2B	0.705	9.6283
ptr_retrop05262	ptr_retrop05262	10	42383614	42383898	+	ENSPTRP00000045861	ENSPTRG00000004329	11	0.779	0.2387
ptr_retrom05511	ENSPTRT00000004547	10	43239681	43240925	-	ENSPTRP00000004408	ENSPTRG00000002553	10	0.579	4.3429
ptr_retrom05512	ptr_retrom05512	10	43380721	43381629	-	ENSPTRP00000001688	ENSPTRG00000000979	1	0.648	88.9394
ptr_retrom05514	ptr_retrom05514	10	43475243	43476625	-	ENSPTRP00000001011	ENSPTRG00000000583	1	0.893	0.096
ptr_retrop05264	ptr_retrop05264	10	43501079	43501550	+	ENSPTRP00000009758	ENSPTRG00000005728	13	0.801	0.2175
ptr_retrop05265	ptr_retrop05265	10	43603441	43603713	+	ENSPTRP00000001203	ENSPTRG00000000691	1	0.857	0.2564
ptriretrom18813	ptriretrom18813	10	44322001	44322399	-	ENSGALP00000000205	ENSGALG00000000150	4	0.865	NA
ptriretrop18545	ptriretrop18545	10	44712296	44713202	+	ENSMMUP00000023280	ENSMMUG00000017696	2	0.727	NA
ptr_retrop05266	ptr_retrop05266	10	44973520	44974131	+	ENSPTRP00000048471	ENSPTRG00000028871	19	0.853	0.1591
ptr_retrom05516	ptr_retrom05516	10	44990809	44991221	-	ENSPTRP00000018953	ENSPTRG00000011037	19	0.85	0.0887
ptriretrom18831	ptriretrom18831	10	45069178	45069621	-	ENSMMUP00000020001	ENSMMUG00000015254	10	0.624	NA
ptriretrom18846	ptriretrom18846	10	45721492	45723520	-	ENSMUSP00000038142	ENSMUSG00000036123	13	0.677	NA
ptriretrop18579	ptriretrop18579	10	46114691	46115068	+	ENSOANP00000015173	ENSOANG00000009558	Ultra497	0.913	NA
ptriretrop18583	ENSPTRT00000076319	10	46271882	46272433	+	ENSP00000262187	ENSG00000106615	7	0.995	NA
ptr_retrom05521	ptr_retrom05521	10	49028103	49029813	-	ENSPTRP00000026081	ENSPTRG00000015106	3	0.892	0.0805
ptriretrom18898	ptriretrom18898	10	49369587	49370022	-	ENSMUSP00000125874	ENSMUSG00000075229	16	0.821	NA
ptr_retrop05274	ptr_retrop05274	10	49733222	49734053	+	ENSPTRP00000003935	ENSPTRG00000002325	10	0.722	0.2966
ptriretrom18906	ENSPTRT00000004695	10	50118367	50119887	-	ENSMODP00000031416	ENSMODG00000011785	X	0.751	NA
ptriretrom18911	ptriretrom18911	10	50803438	50803785	-	ENSGGOP00000026272	ENSGGOG00000006432	2a	0.895	NA
ptr_retrom05526	ptr_retrom05526	10	54043161	54044161	-	ENSPTRP00000007822	ENSPTRG00000004577	12	0.809	0.2974
ptriretrop18617	ENSPTRT00000073636	10	55622336	55623115	+	ENSPPYP00000016543	ENSPPYG00000014814	4	0.969	NA
ptriretrom18931	ptriretrom18931	10	56551060	56551508	-	ENSGALP00000035709	ENSGALG00000016977	1	0.692	NA
ptr_retrom05530	ptr_retrom05530	10	57475166	57476723	-	ENSPTRP00000006096	ENSPTRG00000003510	11	0.914	0.0571
ptr_retrop05281	ptr_retrop05281	10	59329199	59329605	+	ENSPTRP00000013917	ENSPTRG00000008150	16	0.601	NA
ptriretrop18657	ptriretrop18657	10	61599162	61599849	+	ENSPPYP00000021169	ENSPPYG00000018868	8	0.943	NA
ptriretrop18662	ptriretrop18662	10	61806024	61806539	+	ENSPPYP00000018002	ENSPPYG00000016086	5	0.866	NA
ptriretrom18969	ENSPTRT00000073220	10	61972319	61973029	-	ENSP00000433919	ENSG00000074201	11	0.996	NA
ptr_retrom05536	ptr_retrom05536	10	62016742	62017232	-	ENSPTRP00000020842	ENSPTRG00000012152	2A	0.865	0.1755
ptriretrom18988	ptriretrom18988	10	62288797	62289569	-	ENSMMUP00000029411	ENSMMUG00000022341	15	0.931	NA
ptriretrom18989	NA	10	62559514	62560273	-	ENSOANP00000006992	ENSOANG00000004415	15	0.672	NA
ptr_retrom05539	ptr_retrom05539	10	63011960	63012414	-	ENSPTRP00000017019	ENSPTRG00000010012	18	0.558	0.6171
ptr_retrop05285	ptr_retrop05285	10	63235529	63236557	+	ENSPTRP00000051456	ENSPTRG00000007132	15	0.843	0.1491
ptr_retrom05545	ptr_retrom05545	10	63547605	63548052	-	ENSPTRP00000022019	ENSPTRG00000012879	2B	0.65	1.3784
ptriretrop18689	ptriretrop18689	10	65766574	65767278	+	ENSMUSP00000099962	ENSMUSG00000062647	2	0.697	NA
ptr_retrop05289	ptr_retrop05289	10	66187010	66187725	+	ENSPTRP00000033774	ENSPTRG00000019718	7	0.921	0.0942
ptr_retrop05291	ptr_retrop05291	10	66230762	66231226	+	ENSPTRP00000009758	ENSPTRG00000005728	13	0.853	0.0938
ptr_retrop05292	ptr_retrop05292	10	66270788	66271066	+	ENSPTRP00000050931	ENSPTRG00000030046	3	0.867	0.1379
ptr_retrop05294	ptr_retrop05294	10	66311682	66312176	+	ENSPTRP00000038960	ENSPTRG00000022808	9	0.958	0.0417
ptr_retrop05295	ptr_retrop05295	10	66716149	66717051	+	ENSPTRP00000041612	ENSPTRG00000009168	17	0.632	0.4297
ptr_retrop05297	ptr_retrop05297	10	66886603	66887037	+	ENSPTRP00000014891	ENSPTRG00000008742	17	0.828	6.2096
ptr_retrop05299	ptr_retrop05299	10	66960385	66960818	+	ENSPTRP00000014891	ENSPTRG00000008742	17	0.808	0.1464
ptriretrop18764	ptriretrop18764	10	67453160	67453489	+	ENSMMUP00000007570	ENSMMUG00000005734	5	0.784	NA
ptr_retrop05307	ptr_retrop05307	10	67483524	67484421	+	ENSPTRP00000039339	ENSPTRG00000018890	7	0.795	0.7782
ptr_retrom05549	ptr_retrom05549	10	67627131	67627476	-	ENSPTRP00000031780	ENSPTRG00000018618	6	0.785	0.1077
ptr_retrom05551	ptr_retrom05551	10	67772609	67772994	-	ENSPTRP00000013350	ENSPTRG00000007823	16	0.877	0.1427
ptr_retrom05552	ptr_retrom05552	10	67911259	67911658	-	ENSPTRP00000044536	ENSPTRG00000009364	17	0.828	0.1192
ptr_retrop05308	ptr_retrop05308	10	68268261	68269137	+	ENSPTRP00000001659	ENSPTRG00000000963	1	0.824	0.1501
ptr_retrop05312	ptr_retrop05312	10	68664875	68665198	+	ENSPTRP00000020427	ENSPTRG00000011901	2A	0.899	0.037
ptr_retrop05313	ptr_retrop05313	10	68895144	68896310	+	ENSPTRP00000031563	ENSPTRG00000018480	6	0.944	0.0603
ptriretrom19088	ptriretrom19088	10	68992632	68993119	-	ENSGALP00000028022	ENSGALG00000017388	5	0.718	NA
ptr_retrop05316	ptr_retrop05316	10	70725607	70726233	+	ENSPTRP00000025346	ENSPTRG00000014695	3	0.842	0.1385
ptriretrop18835	ptriretrop18835	10	71200137	71200406	+	ENSMODP00000029053	ENSMODG00000023241	2	0.912	NA
ptr_retrop05321	ptr_retrop05321	10	71788838	71789699	+	ENSPTRP00000027042	ENSPTRG00000015718	3	0.838	0.1529
ptr_retrom05558	ptr_retrom05558	10	72014764	72015198	-	ENSPTRP00000014891	ENSPTRG00000008742	17	0.917	0.061
ptriretrop18849	ENSPTRT00000073624	10	72308647	72309561	+	ENSMMUP00000030450	ENSMMUG00000023132	14	0.905	NA
ptr_retrom05561	ptr_retrom05561	10	72930817	72931075	-	ENSPTRP00000010848	ENSPTRG00000006394	14	0.841	0.2799
ptr_retrop05326	ptr_retrop05326	10	72957474	72958315	+	ENSPTRP00000025475	ENSPTRG00000022841	3	0.875	0.1139
ptr_retrom05563	ptr_retrom05563	10	73009353	73009927	-	ENSPTRP00000015661	ENSPTRG00000009194	17	0.667	0.2133
ptr_retrop05327	ptr_retrop05327	10	73114805	73115291	+	ENSPTRP00000020842	ENSPTRG00000012152	2A	0.883	0.1341
ptr_retrom05569	ptr_retrom05569	10	73683655	73684110	-	ENSPTRP00000042839	ENSPTRG00000023064	7	0.933	0.0999
ptr_retrom05570	ptr_retrom05570	10	73985296	73985747	-	ENSPTRP00000007569	ENSPTRG00000004426	11	0.808	0.1089
ptr_retrop05329	ptr_retrop05329	10	75437074	75437473	+	ENSPTRP00000044536	ENSPTRG00000009364	17	0.816	0.1941
ptriretrop18896	ptriretrop18896	10	76340687	76343597	+	ENSMMUP00000001664	ENSMMUG00000001245	18	0.925	NA
ptr_retrom05573	ptr_retrom05573	10	76389664	76391212	-	ENSPTRP00000033661	ENSPTRG00000019660	7	0.888	0.1827
ptr_retrop05342	ptr_retrop05342	10	76571892	76572224	+	ENSPTRP00000028020	ENSPTRG00000016312	4	0.775	0.0844
ptr_retrop05345	ENSPTRT00000074934	10	78144266	78144757	+	ENSPTRP00000039241	ENSPTRG00000008674	17	0.976	0.0451
ptr_retrop05346	ptr_retrop05346	10	78359793	78360212	+	ENSPTRP00000055317	ENSPTRG00000023558	2A	0.922	0.0775
ptr_retrom05576	ptr_retrom05576	10	79591156	79591647	-	ENSPTRP00000039241	ENSPTRG00000008674	17	0.951	0.028
ptr_retrom05578	ptr_retrom05578	10	80052375	80052957	-	ENSPTRP00000019976	ENSPTRG00000011615	2A	0.747	0.3292
ptr_retrom05582	ptr_retrom05582	10	81702534	81703017	-	ENSPTRP00000028484	ENSPTRG00000016597	4	0.778	2.158
ptr_retrom05584	ptr_retrom05584	10	83785350	83785799	-	ENSPTRP00000038960	ENSPTRG00000022808	9	0.742	0.3005
ptriretrop18957	ptriretrop18957	10	83957613	83958430	+	ENSMMUP00000039579	ENSMMUG00000021821	1099214456047	0.924	NA
ptr_retrop05350	ptr_retrop05350	10	85139281	85139691	+	ENSPTRP00000019951	ENSPTRG00000011605	2A	0.662	0.633
ptriretrom19252	ptriretrom19252	10	86075830	86076510	-	ENSGGOP00000014087	ENSGGOG00000014442	9	0.888	NA
ptriretrop18991	ptriretrop18991	10	87444615	87445145	+	ENSGALP00000006295	ENSGALG00000003954	23	0.775	NA
ptriretrom19264	ptriretrom19264	10	88118509	88119172	-	ENSGGOP00000021992	ENSGGOG00000008034	8	0.709	NA
ptriretrop19001	ptriretrop19001	10	88231584	88232577	+	ENSP00000447881	ENSG00000170421	12	0.716	NA
ptr_retrop05354	ptr_retrop05354	10	88388919	88390075	+	ENSPTRP00000029067	ENSPTRG00000016968	5	0.679	0.2374
ptriretrom19304	ptriretrom19304	10	90689139	90690172	-	ENSP00000424702	ENSG00000170502	4	0.756	NA
ptr_retrom05597	ptr_retrom05597	10	91203166	91204165	-	ENSPTRP00000007822	ENSPTRG00000004577	12	0.779	0.3547
ptr_retrom05598	ptr_retrom05598	10	91303728	91305034	-	ENSPTRP00000029993	ENSPTRG00000017563	5	0.773	0.1305
ptriretrop19060	ptriretrop19060	10	91658428	91658931	+	ENSP00000356953	ENSG00000143252	1	0.905	NA
ptriretrop19066	ptriretrop19066	10	91678149	91678988	+	ENSMMUP00000024691	ENSMMUG00000013499	16	0.843	NA
ptriretrop19071	ENSPTRT00000064615	10	91759765	91760223	+	ENSP00000274606	ENSG00000145912	5	0.941	NA
ptriretrom19337	ptriretrom19337	10	92149333	92149724	-	ENSP00000398888	ENSG00000142676	1	0.746	NA
ptr_retrom05599	ptr_retrom05599	10	92221706	92222685	-	ENSPTRP00000022998	ENSPTRG00000013412	20	0.912	0.0764
ptr_retrom05600	ptr_retrom05600	10	92659810	92660321	-	ENSPTRP00000046864	ENSPTRG00000008279	16	0.713	0.2125
ptr_retrom05601	ptr_retrom05601	10	92838256	92838786	-	ENSPTRP00000017019	ENSPTRG00000010012	18	0.943	0.064
ptr_retrom05603	ptr_retrom05603	10	93447294	93447943	-	ENSPTRP00000012292	ENSPTRG00000007188	15	0.793	0.1536
ptr_retrom05607	ptr_retrom05607	10	93517554	93519089	-	ENSPTRP00000002179	ENSPTRG00000001282	1	0.946	0.0267
ptr_retrop05375	ptr_retrop05375	10	93693665	93694877	+	ENSPTRP00000049696	ENSPTRG00000018519	6	0.672	59.0823
ptriretrom19393	ptriretrom19393	10	94150587	94150964	-	ENSGALP00000027030	ENSGALG00000016775	1	0.968	NA
ptriretrop19103	NA	10	94315865	94316266	+	ENSP00000361071	ENSG00000148303	9	0.679	NA
ptr_retrom05612	ptr_retrom05612	10	95459170	95459526	-	ENSPTRP00000009758	ENSPTRG00000005728	13	0.802	0.1896
ptriretrop19122	ptriretrop19122	10	96030843	96031465	+	ENSGGOP00000007063	ENSGGOG00000007220	5	0.895	NA
ptriretrom19420	ptriretrom19420	10	96091785	96092475	-	ENSGGOP00000021640	ENSGGOG00000009371	16	0.685	NA
ptr_retrom05614	ptr_retrom05614	10	96790480	96790878	-	ENSPTRP00000038960	ENSPTRG00000022808	9	0.851	0.0957
ptr_retrom05617	ptr_retrom05617	10	96874701	96875052	-	ENSPTRP00000039611	ENSPTRG00000016353	4	0.681	0.2824
ptriretrop19169	ptriretrop19169	10	98547499	98548191	+	ENSPPYP00000020944	ENSPPYG00000018671	8	0.85	NA
ptr_retrom05618	ptr_retrom05618	10	99296852	99297448	-	ENSPTRP00000041243	ENSPTRG00000010637	19	0.835	0.0792
ptr_retrop05383	ptr_retrop05383	10	99431038	99431836	+	ENSPTRP00000015927	ENSPTRG00000009376	17	0.843	0.133
ptr_retrop05385	ptr_retrop05385	10	102076753	102077105	+	ENSPTRP00000008687	ENSPTRG00000005108	12	0.808	0.1282
ptr_retrom05620	ptr_retrom05620	10	102118969	102119261	-	ENSPTRP00000026873	ENSPTRG00000015620	3	0.646	12.503
ptr_retrom05622	ptr_retrom05622	10	102359383	102359780	-	ENSPTRP00000013350	ENSPTRG00000007823	16	0.812	0.2226
ptriretrop19218	ENSPTRT00000005534	10	102483422	102484105	+	ENSP00000352401	ENSG00000197713	2	0.974	NA
ptr_retrom05626	ptr_retrom05626	10	104935534	104936008	-	ENSPTRP00000042839	ENSPTRG00000023064	7	0.787	0.2436
ptr_retrop05393	ptr_retrop05393	10	104936468	104937204	+	ENSPTRP00000052121	ENSPTRG00000013529	20	0.796	24.9337
ptriretrop19247	ptriretrop19247	10	108181522	108182197	+	ENSGALP00000038213	ENSGALG00000004743	15	0.552	NA
ptriretrop19250	ptriretrop19250	10	108883925	108884610	+	ENSGALP00000036292	ENSGALG00000014567	1	0.755	NA
ptriretrop19258	ptriretrop19258	10	108889909	108890264	+	ENSGALP00000029130	ENSGALG00000013512	Un_random	0.595	NA
ptr_retrop05396	ptr_retrop05396	10	109162218	109162688	+	ENSPTRP00000009758	ENSPTRG00000005728	13	0.809	0.1292
ptriretrom19538	ENSPTRT00000057405	10	109322568	109322972	-	ENSP00000380156	ENSG00000144713	3	1	NA
ptriretrom19546	ptriretrom19546	10	109916965	109917704	-	ENSGGOP00000021992	ENSGGOG00000008034	8	0.773	NA
ptr_retrom05629	ptr_retrom05629	10	110305724	110306332	-	ENSPTRP00000019396	ENSPTRG00000011298	19	0.946	0.0834
ptr_retrom05630	ptr_retrom05630	10	110876756	110877445	-	ENSPTRP00000060553	ENSPTRG00000039153	9	0.739	NA
ptr_retrop05399	ptr_retrop05399	10	112378246	112378626	+	ENSPTRP00000013350	ENSPTRG00000007823	16	0.736	0.367
ptr_retrop05401	ptr_retrop05401	10	112882691	112883119	+	ENSPTRP00000042839	ENSPTRG00000023064	7	0.781	0.2141
ptr_retrop05405	ptr_retrop05405	10	113529226	113529601	+	ENSPTRP00000034647	ENSPTRG00000020231	8	0.742	1.5682
ptr_retrom05634	ptr_retrom05634	10	114113738	114114232	-	ENSPTRP00000042839	ENSPTRG00000023064	7	0.879	0.101
ptr_retrom05636	ptr_retrom05636	10	115867995	115868523	-	ENSPTRP00000038541	ENSPTRG00000022371	X	0.888	0.0862
ptr_retrop05406	ptr_retrop05406	10	116178317	116179021	+	ENSPTRP00000001659	ENSPTRG00000000963	1	0.758	0.2853
ptr_retrom05638	ptr_retrom05638	10	116627657	116628019	-	ENSPTRP00000038960	ENSPTRG00000022808	9	0.78	0.3292
ptr_retrop05407	ptr_retrop05407	10	118085234	118085629	+	ENSPTRP00000024762	ENSPTRG00000014374	22	0.908	0.1204
ptr_retrom05640	ptr_retrom05640	10	118314839	118315389	-	ENSPTRP00000017019	ENSPTRG00000010012	18	0.967	0.0233
ptriretrom19609	ptriretrom19609	10	118373426	118373825	-	ENSOANP00000013294	ENSOANG00000008366	Contig3118	0.843	NA
ptr_retrop05409	ptr_retrop05409	10	119064722	119065558	+	ENSPTRP00000028778	ENSPTRG00000016783	5	0.894	0.0724
ptr_retrop05411	ptr_retrop05411	10	119084181	119084804	+	ENSPTRP00000001146	ENSPTRG00000000659	1	0.851	0.1391
ptr_retrom05641	ptr_retrom05641	10	119130485	119130715	-	ENSPTRP00000036292	ENSPTRG00000021245	9	0.831	0.0953
ptriretrom19625	ptriretrom19625	10	119449463	119450059	-	ENSMMUP00000004102	ENSMMUG00000003073	11	0.84	NA
ptr_retrop05414	ptr_retrop05414	10	121206107	121206478	+	ENSPTRP00000013350	ENSPTRG00000007823	16	0.847	0.2071
ptriretrop19450	ptriretrop19450	10	122374336	122374638	+	ENSPPYP00000012753	ENSPPYG00000011426	21	0.624	NA
ptriretrom19655	ptriretrom19655	10	122647506	122647802	-	ENSGGOP00000011278	ENSGGOG00000011566	12	0.889	NA
ptriretrop19465	ptriretrop19465	10	124422696	124423503	+	ENSGGOP00000007063	ENSGGOG00000007220	5	0.856	NA
ptr_retrom05646	ptr_retrom05646	10	125244711	125245782	-	ENSPTRP00000055755	ENSPTRG00000007983	16	0.838	0.1565
ptr_retrom05650	ptr_retrom05650	10	125535647	125536531	-	ENSPTRP00000025475	ENSPTRG00000022841	3	0.983	0.0214
ptr_retrop05418	ptr_retrop05418	10	125862912	125863507	+	ENSPTRP00000004479	ENSPTRG00000002584	10	0.668	0.2535
ptr_retrom05652	ptr_retrom05652	10	126669242	126669958	-	ENSPTRP00000043513	ENSPTRG00000013661	20	0.958	0.0474
ptr_retrop05419	ENSPTRT00000005818	10	129806521	129808779	+	ENSPTRP00000010683	ENSPTRG00000006297	14	0.883	0.098
ptr_retrom05654	ptr_retrom05654	10	129828578	129829046	-	ENSPTRP00000042839	ENSPTRG00000023064	7	0.727	0.2025
ptr_retrop05420	ptr_retrop05420	10	131724411	131724827	+	ENSPTRP00000015480	ENSPTRG00000009086	17	0.816	0.2553
ptr_retrom05656	ptr_retrom05656	10	132967285	132967989	-	ENSPTRP00000001659	ENSPTRG00000000963	1	0.877	0.1037
ptr_retrop05424	ptr_retrop05424	10	133486989	133488736	+	ENSPTRP00000029122	ENSPTRG00000017008	5	0.744	0.251
ptriretrop15841	ptriretrop15841	11	1798769	1799128	+	ENSP00000404375	ENSG00000241343	X	0.896	NA
ptriretrom15908	NA	11	1807771	1808975	-	ENSMUSP00000130611	ENSMUSG00000029580	5	0.8	NA
ptr_retrop04209	ptr_retrop04209	11	3295147	3295454	+	ENSPTRP00000047122	ENSPTRG00000019637	7	0.825	0.1237
ptriretrom15957	ptriretrom15957	11	3497599	3498375	-	ENSGALP00000016361	ENSGALG00000010077	4	0.803	NA
ptr_retrom04521	ENSPTRT00000055731	11	3725624	3726163	-	ENSPTRP00000032298	ENSPTRG00000018910	7	0.738	65.9014
ptr_retrom04529	ptr_retrom04529	11	3795375	3795865	-	ENSPTRP00000042839	ENSPTRG00000023064	7	0.921	0.1073
ptr_retrop04212	ptr_retrop04212	11	3868819	3869040	+	ENSPTRP00000061270	ENSPTRG00000041316	10	0.703	0.2319
ptr_retrom04531	ptr_retrom04531	11	3885276	3885578	-	ENSPTRP00000053956	ENSPTRG00000031426	21	0.911	0.1486
ptr_retrom04533	ptr_retrom04533	11	4105009	4106354	-	ENSPTRP00000007326	ENSPTRG00000004259	11	0.896	0.094
ptr_retrop04215	ptr_retrop04215	11	4127748	4128329	+	ENSPTRP00000000054	ENSPTRG00000000034	1	0.716	1.3285
ptr_retrop04216	ptr_retrop04216	11	4141400	4141981	+	ENSPTRP00000000054	ENSPTRG00000000034	1	0.711	1.3512
ptr_retrom04567	ptr_retrom04567	11	4497833	4499292	-	ENSPTRP00000008493	ENSPTRG00000004987	12	0.579	74.7916
ptriretrom16305	ptriretrom16305	11	5347164	5347540	-	ENSOANP00000021620	ENSOANG00000013708	Contig30988	0.93	NA
ptr_retrom04797	ptr_retrom04797	11	5775725	5776777	-	ENSPTRP00000008508	ENSPTRG00000004996	12	0.856	0.2457
ptr_retrom04820	ptr_retrom04820	11	6277410	6278045	-	ENSPTRP00000029484	ENSPTRG00000017235	5	0.779	0.2221
ptr_retrom04823	ptr_retrom04823	11	6474272	6474650	-	ENSPTRP00000009758	ENSPTRG00000005728	13	0.802	0.2362
ptr_retrom04835	ptr_retrom04835	11	6634776	6635961	-	ENSPTRP00000029395	ENSPTRG00000017186	5	0.81	0.2052
ptriretrop16360	NA	11	6847381	6848280	+	ENSPPYP00000023255	ENSPPYG00000020771	X	0.753	NA
ptriretrop16383	ptriretrop16383	11	7542853	7543431	+	ENSP00000416638	ENSG00000148303	9	0.888	NA
ptr_retrop04535	ptr_retrop04535	11	8908063	8909391	+	ENSPTRP00000008491	ENSPTRG00000004979	12	0.56	2.6276
ptr_retrom04867	ptr_retrom04867	11	9184391	9184870	-	ENSPTRP00000009758	ENSPTRG00000005728	13	0.994	0
ptriretrop16408	ptriretrop16408	11	9428612	9428956	+	ENSGALP00000006308	ENSGALG00000003966	19	0.956	NA
ptr_retrop04539	ptr_retrop04539	11	9482279	9482753	+	ENSPTRP00000009758	ENSPTRG00000005728	13	0.95	0.0166
ptriretrom16551	ptriretrom16551	11	9787157	9788157	-	ENSMUSP00000114377	ENSMUSG00000026473	1	0.805	NA
ptriretrom16562	ptriretrom16562	11	11602732	11603054	-	ENSOANP00000000943	ENSOANG00000000598	Contig2888	0.731	NA
ptr_retrom04883	ptr_retrom04883	11	11701011	11701401	-	ENSPTRP00000016407	ENSPTRG00000009655	17	0.615	55.8009
ptriretrom16583	ptriretrom16583	11	14482035	14482553	-	ENSOANP00000023079	ENSOANG00000014648	Ultra62	0.919	NA
ptriretrom16603	ptriretrom16603	11	16286778	16287385	-	ENSMUSP00000110703	ENSMUSG00000061758	6	0.623	NA
ptr_retrom04897	ptr_retrom04897	11	16927164	16927459	-	ENSPTRP00000039611	ENSPTRG00000016353	4	0.879	0.0899
ptriretrom16631	ptriretrom16631	11	17230068	17230574	-	ENSP00000356953	ENSG00000143252	1	0.882	NA
ptr_retrop04560	ptr_retrop04560	11	17905667	17905907	+	ENSPTRP00000025515	ENSPTRG00000014802	3	0.821	0.2137
ptr_retrop04568	ENSPTRT00000075234	11	17985233	17985856	+	ENSPTRP00000049917	ENSPTRG00000005431	12	0.931	0.1068
ptr_retrom04907	ptr_retrom04907	11	18279665	18280380	-	ENSPTRP00000052121	ENSPTRG00000013529	20	0.873	0.1595
ptr_retrom04922	ptr_retrom04922	11	19062859	19063589	-	ENSPTRP00000022674	ENSPTRG00000013222	20	0.784	0.28
ptr_retrop04573	ptr_retrop04573	11	21118379	21119011	+	ENSPTRP00000057012	ENSPTRG00000024398	X	0.678	1.2088
ptr_retrop04575	ptr_retrop04575	11	23315243	23317300	+	ENSPTRP00000047787	ENSPTRG00000004091	11	0.741	0.2119
ptriretrop16540	ptriretrop16540	11	23357321	23358048	+	ENSPPYP00000007896	ENSPPYG00000006975	16	0.782	NA
ptriretrom16696	ptriretrom16696	11	25444449	25444766	-	ENSPPYP00000023470	ENSPPYG00000025837	X	0.877	NA
ptr_retrop04578	ptr_retrop04578	11	27458050	27458331	+	ENSPTRP00000007472	ENSPTRG00000004361	11	0.989	0.062
ptr_retrop04579	ptr_retrop04579	11	27688253	27688708	+	ENSPTRP00000032477	ENSPTRG00000019003	7	0.914	0.1291
ptr_retrom04929	ptr_retrom04929	11	27771665	27773302	-	ENSPTRP00000058433	ENSPTRG00000006736	14	0.958	0.0444
ptr_retrom04930	ptr_retrom04930	11	28030672	28030980	-	ENSPTRP00000007446	ENSPTRG00000004342	11	0.718	0.3764
ptriretrom16737	ptriretrom16737	11	28171013	28171400	-	ENSMMUP00000008317	ENSMMUG00000005593	20	0.846	NA
ptriretrop16587	ptriretrop16587	11	29639797	29640557	+	ENSMMUP00000029411	ENSMMUG00000022341	15	0.83	NA
ptr_retrop04584	ptr_retrop04584	11	30291772	30292267	+	ENSPTRP00000038960	ENSPTRG00000022808	9	0.764	0.2486
ptriretrop16601	NA	11	31246672	31247052	+	ENSGALP00000040133	ENSGALG00000013464	25	0.898	NA
ptr_retrop04586	ptr_retrop04586	11	32700247	32700593	+	ENSPTRP00000039611	ENSPTRG00000016353	4	0.786	0.1964
ptriretrom16778	ptriretrom16778	11	33148050	33148235	-	ENSGALP00000033891	ENSGALG00000001454	12	0.738	NA
ptriretrom16786	ptriretrom16786	11	33754593	33755325	-	ENSMODP00000003698	ENSMODG00000003044	8	0.731	NA
ptriretrom16798	ptriretrom16798	11	34319130	34320015	-	ENSP00000389060	ENSG00000168288	2	0.882	NA
ptr_retrop04589	ptr_retrop04589	11	34695052	34695610	+	ENSPTRP00000005010	ENSPTRG00000002851	10	0.64	0.3147
ptr_retrom04945	ptr_retrom04945	11	35856300	35857358	-	ENSPTRP00000008508	ENSPTRG00000004996	12	0.89	0.1707
ptr_retrom04946	ptr_retrom04946	11	35967723	35969386	-	ENSPTRP00000047608	ENSPTRG00000028383	7	0.744	0.1778
ptr_retrom04948	ptr_retrom04948	11	35997944	35998381	-	ENSPTRP00000038960	ENSPTRG00000022808	9	0.811	0.2582
ptriretrop16667	ptriretrop16667	11	37735549	37736219	+	ENSGGOP00000014087	ENSGGOG00000014442	9	0.702	NA
ptriretrop16671	ptriretrop16671	11	39168818	39169328	+	ENSP00000407348	ENSG00000063177	19	0.83	NA
ptriretrop16679	ptriretrop16679	11	41636536	41637085	+	ENSMODP00000025713	ENSMODG00000020553	5	0.695	NA
ptriretrom16847	ptriretrom16847	11	43362115	43363257	-	ENSMMUP00000012171	ENSMMUG00000018871	15	0.739	NA
ptr_retrop04596	ptr_retrop04596	11	43560694	43561173	+	ENSPTRP00000042839	ENSPTRG00000023064	7	0.707	0.2778
ptriretrop16699	NA	11	43617484	43618771	+	ENSP00000357816	ENSG00000175029	10	0.829	NA
ptriretrop16708	ptriretrop16708	11	43814636	43815022	+	ENSP00000389103	ENSG00000198242	17	0.891	NA
ptr_retrop04600	ptr_retrop04600	11	43829633	43830439	+	ENSPTRP00000015927	ENSPTRG00000009376	17	0.882	0.1739
ptr_retrop04602	ptr_retrop04602	11	43994990	43997019	+	ENSPTRP00000057562	ENSPTRG00000009696	17	0.862	0.1314
ptriretrom16881	ptriretrom16881	11	46548357	46548803	-	ENSGALP00000004437	ENSGALG00000002813	26	0.96	NA
ptr_retrom04960	ptr_retrom04960	11	47322187	47322522	-	ENSPTRP00000034700	ENSPTRG00000020264	8	0.955	0.0902
ptr_retrom04962	ENSPTRT00000075563	11	48069931	48070215	-	ENSPTRP00000036204	ENSPTRG00000021184	9	0.947	0.112
ptr_retrom05023	ptr_retrom05023	11	49208734	49212499	-	ENSPTRP00000007603	ENSPTRG00000004452	11	0.754	0.2302
ptr_retrom05053	ptr_retrom05053	11	49808568	49809672	-	ENSPTRP00000029910	ENSPTRG00000017509	5	0.913	0.0581
ptr_retrop04870	ptr_retrop04870	11	57676623	57677560	+	ENSPTRP00000027640	ENSPTRG00000016070	4	0.81	0.117
ptr_retrop04874	ptr_retrop04874	11	58483250	58484101	+	ENSPTRP00000034962	ENSPTRG00000020448	8	0.993	0.0139
ptriretrop17018	ptriretrop17018	11	59472748	59473506	+	ENSGALP00000011717	ENSGALG00000023294	15	0.87	NA
ptriretrom17039	ptriretrom17039	11	59678327	59678577	-	ENSP00000379647	ENSG00000164687	8	0.795	NA
ptr_retrom05059	ptr_retrom05059	11	59681888	59682349	-	ENSPTRP00000008687	ENSPTRG00000005108	12	0.834	0.1577
ptriretrom17054	ptriretrom17054	11	59923224	59923936	-	ENSP00000341885	ENSG00000140988	16	0.818	NA
ptr_retrop04892	ptr_retrop04892	11	60289466	60290663	+	ENSPTRP00000052767	ENSPTRG00000000247	1	0.913	0.109
ptr_retrom05068	ptr_retrom05068	11	60957851	60958447	-	ENSPTRP00000029883	ENSPTRG00000017492	5	0.789	0.1295
ptr_retrop04903	ptr_retrop04903	11	60970665	60971773	+	ENSPTRP00000022120	ENSPTRG00000012949	2B	0.779	0.2284
ptriretrom17124	ptriretrom17124	11	61015273	61016502	-	ENSP00000276602	ENSG00000147601	8	0.976	NA
ptriretrom17130	ptriretrom17130	11	61038114	61038302	-	ENSGALP00000033891	ENSGALG00000001454	12	0.825	NA
ptriretrop17101	ptriretrop17101	11	61164653	61165601	+	ENSP00000362078	ENSG00000112576	6	0.526	NA
ptr_retrop04905	ptr_retrop04905	11	61554484	61554965	+	ENSPTRP00000006031	ENSPTRG00000003472	11	0.894	0.0669
ptr_retrom05071	ENSPTRT00000072983	11	61677064	61677498	-	ENSPTRP00000018953	ENSPTRG00000011037	19	1	0
ptr_retrop04910	ptr_retrop04910	11	62809122	62809507	+	ENSPTRP00000048733	ENSPTRG00000010970	19	0.677	0.2903
ptr_retrom05079	ptr_retrom05079	11	63085402	63085701	-	ENSPTRP00000060206	ENSPTRG00000014802	3	0.848	0.0948
ptriretrop17242	ptriretrop17242	11	64408494	64408838	+	ENSP00000453964	ENSG00000164241	5	0.887	NA
ptriretrom17267	ptriretrom17267	11	64719884	64720492	-	ENSPPYP00000008859	ENSPPYG00000007870	17	0.893	NA
ptriretrom17294	ptriretrom17294	11	65614399	65615106	-	ENSMODP00000016178	ENSMODG00000012929	1	0.656	NA
ptr_retrom05087	ptr_retrom05087	11	65645186	65645449	-	ENSPTRP00000059851	ENSPTRG00000016822	5	0.898	0.023
ptriretrop17289	ENSPTRT00000067381	11	67331465	67331980	+	ENSP00000431872	ENSG00000133112	13	1	NA
ptr_retrom05111	ptr_retrom05111	11	68008834	68009166	-	ENSPTRP00000028020	ENSPTRG00000016312	4	0.802	0.138
ptr_retrom05114	ptr_retrom05114	11	69329005	69329321	-	ENSPTRP00000042761	ENSPTRG00000002666	10	0.684	0.3482
ptriretrop17318	ptriretrop17318	11	69339182	69339957	+	ENSGALP00000016361	ENSGALG00000010077	4	0.795	NA
ptr_retrom05115	ptr_retrom05115	11	69975957	69977397	-	ENSPTRP00000020765	ENSPTRG00000012100	2A	0.815	0.1097
ptr_retrop04984	ptr_retrop04984	11	70441640	70442016	+	ENSPTRP00000031780	ENSPTRG00000018618	6	0.638	0.5856
ptr_retrop04985	ptr_retrop04985	11	70676438	70677046	+	ENSPTRP00000025346	ENSPTRG00000014695	3	0.852	0.0913
ptriretrom17392	ptriretrom17392	11	71675926	71676401	-	ENSPPYP00000005645	ENSPPYG00000004947	12	0.906	NA
ptr_retrom05118	ptr_retrom05118	11	71746419	71747316	-	ENSPTRP00000026230	ENSPTRG00000015200	3	0.771	0.1728
ptriretrop17423	ptriretrop17423	11	72113918	72114683	+	ENSGGOP00000002992	ENSGGOG00000003040	12	0.914	NA
ptriretrom17428	ptriretrom17428	11	72506091	72506396	-	ENSPPYP00000023470	ENSPPYG00000025837	X	0.765	NA
ptr_retrom05121	ENSPTRT00000075209	11	72513314	72513709	-	ENSPTRP00000031780	ENSPTRG00000018618	6	0.977	0.0192
ptriretrop17436	ptriretrop17436	11	72683151	72683526	+	ENSGALP00000027030	ENSGALG00000016775	1	0.864	NA
ptr_retrom05125	ptr_retrom05125	11	73670889	73671278	-	ENSPTRP00000008585	ENSPTRG00000005044	12	0.667	0.2522
ptriretrom17469	ptriretrom17469	11	73701589	73701888	-	ENSGALP00000013729	ENSGALG00000008435	7	0.63	NA
ptr_retrop04999	ptr_retrop04999	11	75098347	75098736	+	ENSPTRP00000003595	ENSPTRG00000002127	1	0.9	0.076
ptr_retrom05134	ptr_retrom05134	11	75540934	75541482	-	ENSPTRP00000019324	ENSPTRG00000011268	19	0.561	5.2763
ptr_retrom05135	ptr_retrom05135	11	75620829	75621145	-	ENSPTRP00000034700	ENSPTRG00000020264	8	0.84	0.146
ptr_retrom05137	ptr_retrom05137	11	75676222	75676698	-	ENSPTRP00000009758	ENSPTRG00000005728	13	0.794	NA
ptr_retrop05002	ptr_retrop05002	11	76197234	76198471	+	ENSPTRP00000038415	ENSPTRG00000022298	X	0.829	0.1028
ptr_retrop05003	ptr_retrop05003	11	77808923	77811044	+	ENSPTRP00000031448	ENSPTRG00000018408	6	0.882	0.1024
ptr_retrom05140	ptr_retrom05140	11	78497861	78498387	-	ENSPTRP00000013352	ENSPTRG00000007824	16	0.812	0.0636
ptr_retrop05005	ptr_retrop05005	11	78810362	78810643	+	ENSPTRP00000009388	ENSPTRG00000005532	12	0.632	0.4073
ptriretrop17552	ptriretrop17552	11	80870978	80871651	+	ENSP00000361076	ENSG00000148303	9	0.737	NA
ptr_retrom05143	ptr_retrom05143	11	81021755	81022052	-	ENSPTRP00000021006	ENSPTRG00000012257	2A	0.64	0.411
ptr_retrom05144	ptr_retrom05144	11	81026311	81026699	-	ENSPTRP00000055317	ENSPTRG00000023558	2A	0.771	0.152
ptr_retrop05012	ptr_retrop05012	11	81124024	81124242	+	ENSPTRP00000002352	ENSPTRG00000001398	1	0.945	0.0396
ptriretrop17573	ptriretrop17573	11	81127633	81128029	+	ENSP00000416429	ENSG00000144713	3	0.838	NA
ptriretrom17591	ptriretrom17591	11	81721519	81722010	-	ENSP00000379385	ENSG00000111716	12	0.57	NA
ptriretrop17588	ptriretrop17588	11	82553739	82554305	+	ENSP00000400467	ENSG00000163682	4	0.817	NA
ptriretrom17595	ptriretrom17595	11	82920882	82921288	-	ENSGGOP00000002701	ENSGGOG00000002741	1	0.551	NA
ptr_retrop05016	ptr_retrop05016	11	83775443	83776734	+	ENSPTRP00000023000	ENSPTRG00000013414	20	0.78	0.3703
ptr_retrop05017	ptr_retrop05017	11	83854784	83855655	+	ENSPTRP00000024206	ENSPTRG00000014057	22	0.859	0.2512
ptr_retrop05018	ptr_retrop05018	11	84224476	84225115	+	ENSPTRP00000036650	ENSPTRG00000021436	9	0.788	0.1895
ptr_retrop05021	ptr_retrop05021	11	84367975	84368452	+	ENSPTRP00000031296	ENSPTRG00000018314	GL390389.1	0.812	0.291
ptr_retrom05147	ptr_retrom05147	11	84756703	84757376	-	ENSPTRP00000021829	ENSPTRG00000012775	2B	0.851	0.1265
ptr_retrom05161	ptr_retrom05161	11	85188896	85189287	-	ENSPTRP00000024762	ENSPTRG00000014374	22	0.824	0.1363
ptr_retrom05162	ptr_retrom05162	11	85259475	85260126	-	ENSPTRP00000048032	ENSPTRG00000019120	7	0.724	0.2805
ptr_retrom05164	ptr_retrom05164	11	85408798	85409316	-	ENSPTRP00000038541	ENSPTRG00000022371	X	0.718	0.1663
ptr_retrom05165	ptr_retrom05165	11	86350937	86351977	-	ENSPTRP00000007822	ENSPTRG00000004577	12	0.842	0.2649
ptriretrom17691	ptriretrom17691	11	87461955	87462320	-	ENSMMUP00000028664	ENSMMUG00000021766	16	0.694	NA
ptr_retrop05023	ptr_retrop05023	11	87705372	87709033	+	ENSPTRP00000007603	ENSPTRG00000004452	11	0.751	0.2289
ptriretrom17700	ptriretrom17700	11	87808287	87809791	-	ENSP00000436755	ENSG00000064309	11	0.708	NA
ptr_retrop05034	ptr_retrop05034	11	88069168	88070495	+	ENSPTRP00000009674	ENSPTRG00000012950	12	0.91	0.0604
ptriretrop17664	ptriretrop17664	11	89924240	89924669	+	ENSP00000361071	ENSG00000148303	9	0.735	NA
ptriretrom17711	ptriretrom17711	11	90127488	90127868	-	ENSP00000367042	ENSG00000147123	X	0.803	NA
ptr_retrom05170	ptr_retrom05170	11	90157199	90157904	-	ENSPTRP00000004915	ENSPTRG00000002807	10	0.797	0.2321
ptr_retrop05036	ptr_retrop05036	11	90739209	90739433	+	ENSPTRP00000020652	ENSPTRG00000012029	2A	0.724	0.2526
ptr_retrom05173	ptr_retrom05173	11	90852807	90853237	-	ENSPTRP00000014891	ENSPTRG00000008742	17	0.779	0.2555
ptriretrop17689	ptriretrop17689	11	91328949	91329229	+	ENSGGOP00000009688	ENSGGOG00000009921	15	0.936	NA
ptr_retrom05174	ptr_retrom05174	11	91406574	91407194	-	ENSPTRP00000023802	ENSPTRG00000013817	21	0.86	0.1035
ptriretrom17764	ptriretrom17764	11	91979272	91979801	-	ENSP00000228825	ENSG00000111229	12	0.915	NA
ptriretrop17740	ptriretrop17740	11	93748325	93748725	+	ENSP00000380158	ENSG00000144713	3	0.763	NA
ptr_retrop05049	ptr_retrop05049	11	98188052	98188798	+	ENSPTRP00000052613	ENSPTRG00000000420	1	0.864	0.1385
ptr_retrop05054	ptr_retrop05054	11	98500320	98500814	+	ENSPTRP00000042839	ENSPTRG00000023064	7	0.897	0.101
ptr_retrom05176	ENSPTRT00000074826	11	98629808	98630809	-	ENSPTRP00000043693	ENSPTRG00000020317	8	0.997	0.0029
ptriretrop17768	ptriretrop17768	11	99447170	99448017	+	ENSP00000377326	ENSG00000122203	5	0.818	NA
ptr_retrop05056	ptr_retrop05056	11	100144433	100145113	+	ENSPTRP00000060553	ENSPTRG00000039153	9	0.789	0.1854
ptr_retrom05178	ptr_retrom05178	11	100654775	100655656	-	ENSPTRP00000016665	ENSPTRG00000009796	17	0.608	18.2623
ptriretrop17790	ptriretrop17790	11	100894138	100894607	+	ENSPPYP00000005960	ENSPPYG00000005233	13	0.786	NA
ptr_retrop05057	ENSPTRT00000055219	11	101895843	101897015	+	ENSPTRP00000000375	ENSPTRG00000024059	1	0.71	1.5485
ptriretrop17800	NA	11	103522503	103523446	+	ENSOANP00000016515	ENSOANG00000010414	Contig9065	0.614	NA
ptr_retrop05059	ptr_retrop05059	11	105031055	105032296	+	ENSPTRP00000036742	ENSPTRG00000021473	9	0.86	0.1373
ptr_retrom05196	ptr_retrom05196	11	105251121	105252189	-	ENSPTRP00000046617	ENSPTRG00000022902	17	0.844	0.0865
ptr_retrom05199	ptr_retrom05199	11	107778593	107779325	-	ENSPTRP00000004339	ENSPTRG00000002519	10	0.66	0.2869
ptr_retrop05062	ptr_retrop05062	11	107857728	107858581	+	ENSPTRP00000025475	ENSPTRG00000022841	3	0.771	0.2491
ptriretrom17902	ptriretrom17902	11	108671311	108671898	-	ENSP00000447260	ENSG00000135486	12	0.889	NA
ptriretrom17908	ptriretrom17908	11	108994433	108994787	-	ENSMODP00000002452	ENSMODG00000002011	1	0.706	NA
ptriretrom17919	ptriretrom17919	11	109567761	109568831	-	ENSMUSP00000023952	ENSMUSG00000049382	15	0.721	NA
ptr_retrom05205	ptr_retrom05205	11	109790273	109790527	-	ENSPTRP00000039476	ENSPTRG00000029029	2B	0.871	0.161
ptr_retrom05209	ptr_retrom05209	11	109936457	109936957	-	ENSPTRP00000001057	ENSPTRG00000000614	1	0.868	0.1098
ptr_retrop05067	ptr_retrop05067	11	110085315	110086159	+	ENSPTRP00000034400	ENSPTRG00000020092	8	0.922	0.029
ptriretrop17866	ptriretrop17866	11	110112884	110113176	+	ENSP00000256441	ENSG00000134056	5	0.743	NA
ptr_retrop05069	ENSPTRT00000045496	11	110122581	110122972	+	ENSPTRP00000031780	ENSPTRG00000018618	6	0.75	0.1918
ptr_retrom05210	ptr_retrom05210	11	110140216	110140811	-	ENSPTRP00000060553	ENSPTRG00000039153	9	0.756	0.2335
ptriretrop17883	ptriretrop17883	11	111681693	111682029	+	ENSP00000367938	ENSG00000115944	2	0.798	NA
ptriretrop17894	ptriretrop17894	11	111701320	111702053	+	ENSGALP00000034498	ENSGALG00000001121	28	0.821	NA
ptr_retrop05077	ptr_retrop05077	11	112488564	112489661	+	ENSPTRP00000029652	ENSPTRG00000017348	5	0.508	72.5477
ptr_retrom05215	ptr_retrom05215	11	113849757	113850362	-	ENSPTRP00000025346	ENSPTRG00000014695	3	0.793	0.0955
ptr_retrop05080	ptr_retrop05080	11	116486828	116487712	+	ENSPTRP00000001659	ENSPTRG00000000963	1	0.879	0.0702
ptr_retrom05223	ptr_retrom05223	11	116766498	116767126	-	ENSPTRP00000036650	ENSPTRG00000021436	9	0.801	0.23
ptriretrom18048	ptriretrom18048	11	116936316	116936686	-	ENSP00000389103	ENSG00000198242	17	0.822	NA
ptr_retrom05253	ptr_retrom05253	11	117544814	117546318	-	ENSPTRP00000008490	ENSPTRG00000020404	12	0.606	100.84
ptriretrom18092	ptriretrom18092	11	118897521	118897913	-	ENSP00000369904	ENSG00000189403	13	0.664	NA
ptr_retrom05254	ptr_retrom05254	11	120565430	120566546	-	ENSPTRP00000002925	ENSPTRG00000001751	1	0.877	0.1146
ptr_retrop05088	ptr_retrop05088	11	120930109	120930866	+	ENSPTRP00000001899	ENSPTRG00000001099	1	0.76	0.1385
ptr_retrop05089	ptr_retrop05089	11	120986166	120987136	+	ENSPTRP00000019221	ENSPTRG00000011202	19	0.884	0.0764
ptr_retrop05090	ptr_retrop05090	11	121004329	121004673	+	ENSPTRP00000039611	ENSPTRG00000016353	4	0.757	0.188
ptriretrop18012	ptriretrop18012	11	121018954	121019196	+	ENSP00000408172	ENSG00000071082	2	0.663	NA
ptriretrom18110	ptriretrom18110	11	121106162	121106553	-	ENSOANP00000010352	ENSOANG00000006482	Ultra222	0.809	NA
ptr_retrom05256	ptr_retrom05256	11	121572520	121574025	-	ENSPTRP00000000980	ENSPTRG00000000559	1	0.915	0.0783
ptr_retrom05390	ptr_retrom05390	11	122786763	122787172	-	ENSPTRP00000020819	ENSPTRG00000012138	2A	0.672	0.2115
ptr_retrop05197	ptr_retrop05197	11	123099128	123100141	+	ENSPTRP00000008508	ENSPTRG00000004996	12	0.776	0.2787
ptr_retrop05201	ptr_retrop05201	11	124046677	124047612	+	ENSPTRP00000008901	ENSPTRG00000005240	12	0.892	0.0812
ptr_retrom05397	ptr_retrom05397	11	128055629	128055982	-	ENSPTRP00000013091	ENSPTRG00000007663	16	0.915	0.263
ptr_retrop05214	ptr_retrop05214	11	128321787	128323558	+	ENSPTRP00000021219	ENSPTRG00000012391	2B	0.879	0.1513
ptr_retrom05401	ptr_retrom05401	11	128589600	128590228	-	ENSPTRP00000050271	ENSPTRG00000018053	6	0.905	0.2198
ptriretrom18350	ptriretrom18350	11	131954202	131955059	-	ENSMMUP00000020071	ENSMMUG00000015306	19	0.828	NA
ptr_retrom05404	ptr_retrom05404	11	132220533	132221034	-	ENSPTRP00000000818	ENSPTRG00000000467	1	0.892	0.11
ptr_retrom05663	ptr_retrom05663	12	1817158	1817935	-	ENSPTRP00000037867	ENSPTRG00000022025	X	0.875	0.1135
ptr_retrom05664	ptr_retrom05664	12	1925137	1926127	-	ENSPTRP00000053314	ENSPTRG00000006055	13	0.67	0.4145
ptriretrop19560	ptriretrop19560	12	2731543	2732122	+	ENSMMUP00000017698	ENSMMUG00000003412	15	0.673	NA
ptriretrop19565	ptriretrop19565	12	2861407	2861787	+	ENSP00000389103	ENSG00000198242	17	0.835	NA
ptr_retrom05666	ptr_retrom05666	12	3161388	3161989	-	ENSPTRP00000019396	ENSPTRG00000011298	19	0.92	0.1191
ptr_retrom05670	ptr_retrom05670	12	4209296	4209802	-	ENSPTRP00000019289	ENSPTRG00000011245	19	0.754	0.6025
ptr_retrom05672	ptr_retrom05672	12	4420880	4421311	-	ENSPTRP00000017340	ENSPTRG00000010200	19	0.883	0.6103
ptr_retrom05673	ptr_retrom05673	12	4710412	4711648	-	ENSPTRP00000002758	ENSPTRG00000001657	1	0.853	0.1052
ptr_retrom05676	ptr_retrom05676	12	4743136	4743627	-	ENSPTRP00000025327	ENSPTRG00000014682	3	0.861	0.0733
ptr_retrop05452	ptr_retrop05452	12	5721947	5722222	+	ENSPTRP00000014307	ENSPTRG00000008379	16	0.587	56.2395
ptriretrom19846	ptriretrom19846	12	6569170	6569424	-	ENSP00000408172	ENSG00000071082	2	0.906	NA
ptr_retrop05453	ptr_retrop05453	12	6596178	6596468	+	ENSPTRP00000011801	ENSPTRG00000006911	15	0.918	0.2031
ptr_retrop05456	ptr_retrop05456	12	6636319	6638812	+	ENSPTRP00000008236	ENSPTRG00000004820	12	0.898	0.091
ptr_retrop05461	ptr_retrop05461	12	7052220	7052672	+	ENSPTRP00000022766	ENSPTRG00000013275	20	0.877	0.1603
ptr_retrop05463	ptr_retrop05463	12	7200587	7200877	+	ENSPTRP00000059851	ENSPTRG00000016822	5	0.691	0.1343
ptr_retrop05465	ENSPTRT00000074395	12	7782088	7783866	+	ENSPTRP00000050501	ENSPTRG00000004601	12	0.586	78.3373
ptriretrop19719	ptriretrop19719	12	7835250	7835755	+	ENSMUSP00000103478	ENSMUSG00000028478	4	0.829	NA
ptriretrop19727	ptriretrop19727	12	8091262	8091589	+	ENSP00000427788	ENSG00000008988	8	0.655	NA
ptr_retrop05467	ptr_retrop05467	12	8103708	8104114	+	ENSPTRP00000016740	ENSPTRG00000009835	18	0.784	60.865
ptr_retrom05685	ptr_retrom05685	12	8371715	8372789	-	ENSPTRP00000030631	ENSPTRG00000017953	6	0.953	0.0275
ptr_retrom05686	ptr_retrom05686	12	8380273	8380654	-	ENSPTRP00000014317	ENSPTRG00000008386	16	0.677	0.2813
ptriretrom19957	ptriretrom19957	12	8592817	8593592	-	ENSGALP00000016361	ENSGALG00000010077	4	0.777	NA
ptr_retrop05468	ptr_retrop05468	12	8600130	8600446	+	ENSPTRP00000042761	ENSPTRG00000002666	10	0.675	0.3667
ptr_retrop05469	ptr_retrop05469	12	8672903	8673514	+	ENSPTRP00000025346	ENSPTRG00000014695	3	0.853	0.0627
ptr_retrom05696	ptr_retrom05696	12	8734697	8734978	-	ENSPTRP00000016051	ENSPTRG00000009451	17	0.862	0.1033
ptr_retrop05470	ptr_retrop05470	12	9265431	9266319	+	ENSPTRP00000053176	ENSPTRG00000020205	8	0.579	8.4691
ptriretrop19793	ptriretrop19793	12	9520068	9520472	+	ENSGGOP00000021916	ENSGGOG00000028305	15	0.854	NA
ptr_retrop05474	ptr_retrop05474	12	9823601	9824891	+	ENSPTRP00000013976	ENSPTRG00000008185	16	0.872	0.1086
ptriretrop19811	ptriretrop19811	12	9876995	9877841	+	ENSGGOP00000007063	ENSGGOG00000007220	5	0.859	NA
ptr_retrop05476	ptr_retrop05476	12	10303085	10303777	+	ENSPTRP00000027864	ENSPTRG00000016217	4	0.601	11.9927
ptriretrop19829	ENSPTRT00000062188	12	10716867	10718282	+	ENSP00000253039	ENSG00000130741	X	0.989	NA
ptriretrop19842	ptriretrop19842	12	10987398	10987697	+	ENSMUSP00000074724	ENSMUSG00000073676	1	0.794	NA
ptr_retrop05480	ptr_retrop05480	12	11729067	11729364	+	ENSPTRP00000060206	ENSPTRG00000014802	3	0.697	0.3155
ptriretrop19854	ptriretrop19854	12	11763543	11764948	+	ENSGGOP00000025368	ENSGGOG00000026102	12	0.822	NA
ptriretrom20076	ptriretrom20076	12	12464237	12464607	-	ENSOANP00000023079	ENSOANG00000014648	Ultra62	0.874	NA
ptriretrop19869	ptriretrop19869	12	12513111	12513671	+	ENSGALP00000012992	ENSGALG00000008015	20	0.857	NA
ptr_retrom05773	ptr_retrom05773	12	12830398	12830803	-	ENSPTRP00000015480	ENSPTRG00000009086	17	0.686	0.3669
ptr_retrom05775	ptr_retrom05775	12	13109234	13109509	-	ENSPTRP00000039476	ENSPTRG00000029029	2B	0.783	0.3111
ptr_retrop05486	ptr_retrop05486	12	13119314	13120004	+	ENSPTRP00000060553	ENSPTRG00000039153	9	0.866	0.0827
ptr_retrop05488	ptr_retrop05488	12	13143440	13144048	+	ENSPTRP00000019396	ENSPTRG00000011298	19	0.956	0.0593
ptriretrom20134	NA	12	14640582	14640831	-	ENSGALP00000013355	ENSGALG00000008212	2	0.721	NA
ptr_retrom05793	ptr_retrom05793	12	16270774	16271494	-	ENSPTRP00000010607	ENSPTRG00000006250	14	0.705	0.3042
ptr_retrop05516	ptr_retrop05516	12	16813083	16814266	+	ENSPTRP00000013976	ENSPTRG00000008185	16	0.823	0.214
ptriretrop19940	ptriretrop19940	12	17291298	17291735	+	ENSGALP00000010447	ENSGALG00000006474	13	0.863	NA
ptr_retrop05520	ptr_retrop05520	12	17293266	17294551	+	ENSPTRP00000045593	ENSPTRG00000018347	6	0.877	0.1125
ptriretrop19957	ptriretrop19957	12	17426685	17427280	+	ENSMODP00000008850	ENSMODG00000007136	3	0.693	NA
ptr_retrom05794	ptr_retrom05794	12	17689496	17690668	-	ENSPTRP00000011273	ENSPTRG00000006623	14	0.819	0.1168
ptr_retrop05523	ptr_retrop05523	12	17706702	17707205	+	ENSPTRP00000003082	ENSPTRG00000001842	1	0.693	16.62
ptriretrop19971	ptriretrop19971	12	19026723	19027516	+	ENSP00000445147	ENSG00000100764	14	0.947	NA
ptr_retrop05525	ptr_retrop05525	12	19115713	19116294	+	ENSPTRP00000015480	ENSPTRG00000009086	17	0.888	0.063
ptriretrop19989	ptriretrop19989	12	19437121	19437816	+	ENSP00000339795	ENSG00000147604	8	0.957	NA
ptr_retrom05796	ptr_retrom05796	12	19456576	19456905	-	ENSPTRP00000059966	ENSPTRG00000039907	19	0.867	0.2549
ptr_retrop05526	ptr_retrop05526	12	19763564	19763867	+	ENSPTRP00000018476	ENSPTRG00000010791	19	0.942	0.0839
ptr_retrom05799	ptr_retrom05799	12	19809313	19810713	-	ENSPTRP00000045593	ENSPTRG00000018347	6	0.882	0.0752
ptr_retrop05527	ptr_retrop05527	12	19862055	19862396	+	ENSPTRP00000039611	ENSPTRG00000016353	4	0.772	0.1651
ptr_retrop05528	ptr_retrop05528	12	20307209	20308852	+	ENSPTRP00000032017	ENSPTRG00000018760	6	0.906	0.0948
ptr_retrom05806	ptr_retrom05806	12	21870664	21871202	-	ENSPTRP00000024212	ENSPTRG00000014061	22	0.641	0.2669
ptriretrop20024	ptriretrop20024	12	21958514	21959657	+	ENSMUSP00000099858	ENSMUSG00000035778	2	0.643	NA
ptr_retrop05531	ENSPTRT00000075242	12	22995957	22997108	+	ENSPTRP00000008683	ENSPTRG00000005104	12	0.694	17.8547
ptr_retrop05532	ptr_retrop05532	12	23000031	23000894	+	ENSPTRP00000008683	ENSPTRG00000005104	12	0.661	18.3146
ptr_retrom05808	ptr_retrom05808	12	23199687	23200163	-	ENSPTRP00000009758	ENSPTRG00000005728	13	0.912	0.0728
ptr_retrop05537	ptr_retrop05537	12	23487532	23488409	+	ENSPTRP00000025475	ENSPTRG00000022841	3	0.854	0.1281
ptr_retrop05538	ptr_retrop05538	12	23830540	23831571	+	ENSPTRP00000008508	ENSPTRG00000004996	12	0.82	0.1708
ptriretrom20253	ptriretrom20253	12	24118363	24118940	-	ENSMUSP00000109530	ENSMUSG00000079508	X	0.684	NA
ptr_retrom05810	ptr_retrom05810	12	24873118	24873582	-	ENSPTRP00000019397	ENSPTRG00000011299	19	0.748	0.4701
ptriretrop20067	ptriretrop20067	12	24931319	24931936	+	ENSP00000382694	ENSG00000131100	22	0.85	NA
ptr_retrom05811	ptr_retrom05811	12	24997538	24997893	-	ENSPTRP00000049912	ENSPTRG00000029545	6	0.723	0.1263
ptriretrop20080	ptriretrop20080	12	25399543	25399845	+	ENSPPYP00000023470	ENSPPYG00000025837	X	0.877	NA
ptr_retrom05813	ptr_retrom05813	12	25448913	25450744	-	ENSPTRP00000023243	ENSPTRG00000013531	20	0.642	48.6116
ptr_retrop05544	ptr_retrop05544	12	26236566	26236988	+	ENSPTRP00000012123	ENSPTRG00000007094	15	0.766	0.1652
ptr_retrom05820	ptr_retrom05820	12	26287744	26288879	-	ENSPTRP00000005960	ENSPTRG00000003423	11	0.785	0.3517
ptr_retrom05821	ptr_retrom05821	12	26289636	26289959	-	ENSPTRP00000031977	ENSPTRG00000018735	6	0.898	0.052
ptr_retrom05823	ptr_retrom05823	12	26538105	26539101	-	ENSPTRP00000007822	ENSPTRG00000004577	12	0.898	0.2463
ptriretrom20316	ptriretrom20316	12	26635494	26635891	-	ENSP00000416429	ENSG00000144713	3	0.843	NA
ptriretrop20113	ptriretrop20113	12	27063209	27064319	+	ENSMMUP00000007867	ENSMMUG00000005986	1	0.787	NA
ptriretrop20115	ptriretrop20115	12	27279977	27280539	+	ENSGALP00000035584	ENSGALG00000017330	1	0.899	NA
ptr_retrom05827	ptr_retrom05827	12	27418161	27419280	-	ENSPTRP00000008490	ENSPTRG00000020404	12	0.58	101.698
ptriretrom20327	ptriretrom20327	12	27522792	27523185	-	ENSPPYP00000005960	ENSPPYG00000005233	13	0.788	NA
ptr_retrop05549	ENSPTRT00000075639	12	27537310	27537759	+	ENSPTRP00000032477	ENSPTRG00000019003	7	0.747	54.5035
ptr_retrop05551	ptr_retrop05551	12	30269384	30270589	+	ENSPTRP00000006015	ENSPTRG00000003461	11	0.904	0.1168
ptr_retrom05828	ptr_retrom05828	12	30302793	30303368	-	ENSPTRP00000060553	ENSPTRG00000039153	9	0.789	0.1465
ptr_retrom05830	ptr_retrom05830	12	30948460	30948988	-	ENSPTRP00000003488	ENSPTRG00000002066	1	0.723	0.4538
ptr_retrom05832	ptr_retrom05832	12	31090165	31090518	-	ENSPTRP00000009758	ENSPTRG00000005728	13	0.786	0.1135
ptriretrom20407	ptriretrom20407	12	32842159	32843820	-	ENSP00000373620	ENSG00000144381	2	0.935	NA
ptr_retrop05565	ptr_retrop05565	12	33383346	33383952	+	ENSPTRP00000002305	ENSPTRG00000001370	1	0.97	0.0333
ptriretrop20211	ptriretrop20211	12	33496601	33497152	+	ENSP00000340167	ENSG00000138430	2	0.74	NA
ptriretrop20217	ptriretrop20217	12	33711106	33711697	+	ENSPPYP00000009557	ENSPPYG00000008505	17	0.82	NA
ptr_retrop05577	ptr_retrop05577	12	34416292	34417136	+	ENSPTRP00000029484	ENSPTRG00000017235	5	0.89	0.1139
ptriretrop20280	ptriretrop20280	12	35619112	35619486	+	ENSGALP00000027030	ENSGALG00000016775	1	0.805	NA
ptr_retrom05912	ptr_retrom05912	12	36114346	36115563	-	ENSPTRP00000014825	ENSPTRG00000008694	17	0.924	0.0927
ptr_retrom05916	ptr_retrom05916	12	36128284	36128586	-	ENSPTRP00000060206	ENSPTRG00000014802	3	0.97	0.0576
ptr_retrom05917	ptr_retrom05917	12	36138659	36139296	-	ENSPTRP00000010967	ENSPTRG00000006468	14	0.707	0.2318
ptriretrom20691	ptriretrom20691	12	36397255	36397798	-	ENSP00000379730	ENSG00000147604	8	0.796	NA
ptr_retrom05920	ptr_retrom05920	12	36503868	36504029	-	ENSPTRP00000061334	ENSPTRG00000040141	19	0.667	0.6105
ptr_retrom05921	ptr_retrom05921	12	36522759	36523127	-	ENSPTRP00000013917	ENSPTRG00000008150	16	0.837	0.3078
ptr_retrom05922	ptr_retrom05922	12	36539875	36540903	-	ENSPTRP00000005896	ENSPTRG00000003377	11	0.895	0.0389
ptriretrop20307	ptriretrop20307	12	37595400	37595780	+	ENSOANP00000021620	ENSOANG00000013708	Contig30988	0.835	NA
ptr_retrop05583	ptr_retrop05583	12	38186425	38187212	+	ENSPTRP00000015927	ENSPTRG00000009376	17	0.826	0.2692
ptr_retrom05926	ptr_retrom05926	12	38968125	38968529	-	ENSPTRP00000014891	ENSPTRG00000008742	17	0.874	0.0242
ptriretrom20800	ptriretrom20800	12	39641269	39641537	-	ENSPPYP00000013467	ENSPPYG00000012078	2a	0.674	NA
ptr_retrom05934	ptr_retrom05934	12	39734093	39734389	-	ENSPTRP00000060206	ENSPTRG00000014802	3	0.806	0.1353
ptr_retrom05936	ptr_retrom05936	12	39766885	39767392	-	ENSPTRP00000052888	ENSPTRG00000000102	1	0.865	0.1317
ptriretrom20831	ptriretrom20831	12	39973160	39973812	-	ENSGALP00000022765	ENSGALG00000014084	1	0.82	NA
ptriretrop20395	ptriretrop20395	12	40472310	40472711	+	ENSP00000416429	ENSG00000144713	3	0.932	NA
ptr_retrop05592	ptr_retrop05592	12	40576092	40576618	+	ENSPTRP00000054941	ENSPTRG00000013204	20	0.792	0.3463
ptr_retrom05940	ptr_retrom05940	12	40858022	40858335	-	ENSPTRP00000029963	ENSPTRG00000017544	5	0.738	0.3104
ptriretrom20879	ptriretrom20879	12	40884497	40884972	-	ENSP00000453838	ENSG00000140350	15	0.862	NA
ptr_retrop05594	ptr_retrop05594	12	41195980	41196693	+	ENSPTRP00000015927	ENSPTRG00000009376	17	0.863	0.1453
ptr_retrop05595	ptr_retrop05595	12	41204591	41205435	+	ENSPTRP00000014948	ENSPTRG00000008774	17	0.634	0.3383
ptr_retrop05598	ptr_retrop05598	12	41308546	41308798	+	ENSPTRP00000059851	ENSPTRG00000016822	5	0.73	0.2224
ptr_retrom05947	ptr_retrom05947	12	41738472	41738946	-	ENSPTRP00000009758	ENSPTRG00000005728	13	0.975	0.0001
ptriretrop20471	ptriretrop20471	12	42035992	42036470	+	ENSGGOP00000019965	ENSGGOG00000026298	7	0.706	NA
ptr_retrom05948	ENSPTRT00000008996	12	42144672	42145967	-	ENSPTRP00000022579	ENSPTRG00000013185	20	0.538	1.5568
ptr_retrop05602	ptr_retrop05602	12	43381293	43381814	+	ENSPTRP00000019396	ENSPTRG00000011298	19	0.603	0.9517
ptriretrom20922	ptriretrom20922	12	43965029	43965493	-	ENSMUSP00000091768	ENSMUSG00000038503	7	0.677	NA
ptr_retrop05603	ptr_retrop05603	12	44234487	44236044	+	ENSPTRP00000032524	ENSPTRG00000019036	7	0.952	0.0295
ptr_retrop05604	ptr_retrop05604	12	44357110	44358735	+	ENSPTRP00000008406	ENSPTRG00000004921	12	0.885	0.0569
ptr_retrop05605	ptr_retrop05605	12	45170767	45171340	+	ENSPTRP00000025855	ENSPTRG00000014977	3	0.628	0.2354
ptriretrom20933	ptriretrom20933	12	45755000	45756261	-	ENSOANP00000021812	ENSOANG00000013836	Ultra746	0.856	NA
ptr_retrop05609	ptr_retrop05609	12	45852939	45853450	+	ENSPTRP00000009758	ENSPTRG00000005728	13	0.89	0.1285
ptriretrop20546	ptriretrop20546	12	46365053	46365340	+	ENSP00000256441	ENSG00000134056	5	0.76	NA
ptriretrop20561	ptriretrop20561	12	46792400	46792722	+	ENSP00000363041	ENSG00000122873	10	0.88	NA
ptr_retrop05616	ptr_retrop05616	12	47000876	47002568	+	ENSPTRP00000014831	ENSPTRG00000008698	17	0.554	43.1283
ptr_retrom05956	ptr_retrom05956	12	47146507	47148170	-	ENSPTRP00000032446	ENSPTRG00000018986	7	0.616	24.1082
ptr_retrom05957	ptr_retrom05957	12	48713010	48714012	-	ENSPTRP00000027998	ENSPTRG00000016302	4	0.711	0.3704
ptriretrop20579	NA	12	49390305	49390649	+	ENSMMUP00000026408	ENSMMUG00000020073	8	0.815	NA
ptriretrom20964	ptriretrom20964	12	50285534	50285767	-	ENSP00000417656	ENSG00000131174	X	0.633	NA
ptriretrom20972	ENSPTRT00000073594	12	50599472	50599768	-	ENSP00000295958	ENSG00000163683	4	0.99	NA
ptr_retrop05619	ptr_retrop05619	12	51373436	51373885	+	ENSPTRP00000029027	ENSPTRG00000016949	5	0.894	0.1246
ptr_retrom05966	ptr_retrom05966	12	54107582	54108027	-	ENSPTRP00000029027	ENSPTRG00000016949	5	0.852	0.1211
ptriretrom21003	NA	12	54912843	54913878	-	ENSP00000216218	ENSG00000100380	22	0.814	NA
ptr_retrom05969	ptr_retrom05969	12	55401944	55403171	-	ENSPTRP00000036742	ENSPTRG00000021473	9	0.871	0.1412
ptr_retrop05635	ptr_retrop05635	12	55664148	55665076	+	ENSPTRP00000008902	ENSPTRG00000028747	11	0.601	3.3294
ptr_retrop05636	ptr_retrop05636	12	56170898	56171364	+	ENSPTRP00000016413	ENSPTRG00000009660	17	0.73	0.4081
ptriretrom21032	ptriretrom21032	12	56403361	56403663	-	ENSP00000418348	ENSG00000187118	3	0.631	NA
ptr_retrom05975	ptr_retrom05975	12	56464706	56465199	-	ENSPTRP00000038960	ENSPTRG00000022808	9	0.921	0.0895
ptr_retrop05651	ptr_retrop05651	12	56639212	56639619	+	ENSPTRP00000016407	ENSPTRG00000009655	17	0.963	0.082
ptr_retrom05979	ptr_retrom05979	12	56955260	56955686	-	ENSPTRP00000021034	ENSPTRG00000012275	2A	0.769	0.2238
ptr_retrop05653	ptr_retrop05653	12	57187663	57188289	+	ENSPTRP00000019396	ENSPTRG00000011298	19	0.933	0.0776
ptr_retrom05980	ptr_retrom05980	12	57197227	57197472	-	ENSPTRP00000032349	ENSPTRG00000018934	7	0.683	0.216
ptriretrom21069	ptriretrom21069	12	57270631	57272627	-	ENSMUSP00000132990	ENSMUSG00000030662	14	0.726	NA
ptriretrop20665	ptriretrop20665	12	58823729	58823935	+	ENSP00000434298	ENSG00000122026	13	0.783	NA
ptriretrop20672	ptriretrop20672	12	59926708	59927171	+	ENSGGOP00000019158	ENSGGOG00000024691	3	0.842	NA
ptriretrom21109	ptriretrom21109	12	62714245	62715474	-	ENSP00000376611	ENSG00000139372	12	0.968	NA
ptriretrom21121	ptriretrom21121	12	63877521	63877889	-	ENSPPYP00000005960	ENSPPYG00000005233	13	0.707	NA
ptriretrom21129	ptriretrom21129	12	63936313	63937604	-	ENSP00000219837	ENSG00000103550	16	0.836	NA
ptriretrop20726	ptriretrop20726	12	67788514	67788890	+	ENSOANP00000021620	ENSOANG00000013708	Contig30988	0.764	NA
ptr_retrop05661	ptr_retrop05661	12	68233891	68235069	+	ENSPTRP00000010766	ENSPTRG00000006352	14	0.901	0.0843
ptr_retrom05992	ptr_retrom05992	12	68313787	68314671	-	ENSPTRP00000025475	ENSPTRG00000022841	3	0.953	0.0266
ptr_retrom05994	ptr_retrom05994	12	68406710	68407189	-	ENSPTRP00000016363	ENSPTRG00000009628	17	0.881	0.0641
ptr_retrop05663	ptr_retrop05663	12	68471561	68473058	+	ENSPTRP00000008493	ENSPTRG00000004987	12	0.543	96.8918
ptriretrop20757	ptriretrop20757	12	69049017	69050064	+	ENSMMUP00000021457	ENSMMUG00000016338	3	0.845	NA
ptr_retrop05665	ptr_retrop05665	12	70452516	70453456	+	ENSPTRP00000020939	ENSPTRG00000012214	2A	0.863	0.1195
ptr_retrom05999	ptr_retrom05999	12	71671299	71672449	-	ENSPTRP00000030349	ENSPTRG00000017774	6	0.828	0.1034
ptriretrom21209	ptriretrom21209	12	72270682	72270948	-	ENSMUSP00000125754	ENSMUSG00000060743	1	0.75	NA
ptriretrop20777	ptriretrop20777	12	73492111	73492488	+	ENSGALP00000027030	ENSGALG00000016775	1	0.81	NA
ptriretrop20787	ptriretrop20787	12	74159481	74160256	+	ENSGGOP00000003282	ENSGGOG00000003340	10	0.835	NA
ptriretrop20790	ENSPTRT00000073122	12	74411570	74411851	+	ENSMMUP00000034346	ENSMMUG00000029935	16	0.644	NA
ptr_retrom06003	ptr_retrom06003	12	74543140	74543481	-	ENSPTRP00000014400	ENSPTRG00000008445	16	0.835	0.1177
ptr_retrom06004	ptr_retrom06004	12	74608497	74609264	-	ENSPTRP00000047355	ENSPTRG00000022053	X	0.565	0.8365
ptr_retrom06005	ptr_retrom06005	12	75148868	75149722	-	ENSPTRP00000027828	ENSPTRG00000016196	4	0.592	0.711
ptr_retrop05673	ptr_retrop05673	12	75956083	75956666	+	ENSPTRP00000009486	ENSPTRG00000005584	12	0.903	0.1153
ptr_retrop05674	ptr_retrop05674	12	76034612	76035815	+	ENSPTRP00000031531	ENSPTRG00000018461	6	0.888	0.0892
ptriretrop20828	ptriretrop20828	12	76523244	76523974	+	ENSGGOP00000014087	ENSGGOG00000014442	9	0.82	NA
ptr_retrop05677	ptr_retrop05677	12	76583305	76583784	+	ENSPTRP00000009758	ENSPTRG00000005728	13	0.975	0.0082
ptriretrop20845	ptriretrop20845	12	76644927	76645630	+	ENSP00000339795	ENSG00000147604	8	0.735	NA
ptriretrom21254	ptriretrom21254	12	76908234	76908822	-	ENSP00000327583	ENSG00000099901	22	0.871	NA
ptr_retrom06010	ptr_retrom06010	12	78069274	78069854	-	ENSPTRP00000004683	ENSPTRG00000002685	10	0.721	0.1809
ptr_retrom06013	ptr_retrom06013	12	78788568	78789180	-	ENSPTRP00000032640	ENSPTRG00000019108	7	0.913	0.158
ptriretrop20865	ptriretrop20865	12	80035031	80035779	+	ENSMMUP00000006809	ENSMMUG00000005141	8	0.874	NA
ptr_retrom06015	ptr_retrom06015	12	80108478	80108912	-	ENSPTRP00000014891	ENSPTRG00000008742	17	0.952	0.0547
ptriretrom21291	ptriretrom21291	12	80561545	80561885	-	ENSMMUP00000012274	ENSMMUG00000009373	1	0.612	NA
ptriretrop20879	ptriretrop20879	12	83207074	83207806	+	ENSP00000403172	ENSG00000089009	12	0.899	NA
ptr_retrom06017	ptr_retrom06017	12	84526898	84527890	-	ENSPTRP00000021923	ENSPTRG00000012823	2B	0.723	NA
ptr_retrop05682	ptr_retrop05682	12	87063334	87063813	+	ENSPTRP00000009758	ENSPTRG00000005728	13	0.969	0.0088
ptriretrom21329	ptriretrom21329	12	87327847	87328197	-	ENSOANP00000015173	ENSOANG00000009558	Ultra497	0.669	NA
ptr_retrom06023	ptr_retrom06023	12	87938049	87939323	-	ENSPTRP00000033861	ENSPTRG00000019766	7	0.895	0.1008
ptr_retrop05687	ptr_retrop05687	12	88107095	88107670	+	ENSPTRP00000037867	ENSPTRG00000022025	X	0.755	0.3434
ptr_retrop05688	ptr_retrop05688	12	89640286	89643119	+	ENSPTRP00000027684	ENSPTRG00000016096	4	0.916	0.0429
ptr_retrom06024	ptr_retrom06024	12	89663201	89664565	-	ENSPTRP00000049150	ENSPTRG00000021180	9	0.614	10.6144
ptriretrop20925	ptriretrop20925	12	89894764	89895680	+	ENSGGOP00000010288	ENSGGOG00000010552	6	0.797	NA
ptr_retrop05690	ptr_retrop05690	12	92351427	92351904	+	ENSPTRP00000009758	ENSPTRG00000005728	13	0.806	0.1415
ptr_retrop05691	ptr_retrop05691	12	92713824	92714623	+	ENSPTRP00000006211	ENSPTRG00000003573	11	0.766	0.2603
ptr_retrop05695	ptr_retrop05695	12	93048702	93049884	+	ENSPTRP00000020815	ENSPTRG00000012134	2A	0.868	0.1067
ptriretrop20958	ptriretrop20958	12	93074654	93075029	+	ENSOANP00000021620	ENSOANG00000013708	Contig30988	0.921	NA
ptr_retrop05696	ptr_retrop05696	12	93233741	93234220	+	ENSPTRP00000007885	ENSPTRG00000004617	12	0.738	0.0522
ptriretrom21392	NA	12	93324260	93324691	-	ENSGALP00000000669	ENSGALG00000000489	E22C19W28_E50C23	0.868	NA
ptr_retrom06036	ptr_retrom06036	12	94646048	94647124	-	ENSPTRP00000008683	ENSPTRG00000005104	12	0.975	0.0123
ptr_retrom06037	ptr_retrom06037	12	94745341	94746119	-	ENSPTRP00000029097	ENSPTRG00000016990	5	0.904	0.0663
ptriretrop20985	ptriretrop20985	12	94772554	94773661	+	ENSGGOP00000021081	ENSGGOG00000027438	3	0.962	NA
ptr_retrop05699	ptr_retrop05699	12	94815533	94815805	+	ENSPTRP00000025273	ENSPTRG00000014650	3	0.824	0.077
ptr_retrop05705	ptr_retrop05705	12	95064384	95065311	+	ENSPTRP00000041612	ENSPTRG00000009168	17	0.771	0.219
ptr_retrop05707	ptr_retrop05707	12	95337387	95337872	+	ENSPTRP00000060423	ENSPTRG00000042455	1	0.745	0.327
ptriretrop21017	ptriretrop21017	12	95364242	95364624	+	ENSP00000443391	ENSG00000188846	3	0.781	NA
ptr_retrom06040	ptr_retrom06040	12	95525149	95525637	-	ENSPTRP00000032477	ENSPTRG00000019003	7	0.867	0.1829
ptriretrom21434	ptriretrom21434	12	95712223	95712411	-	ENSGALP00000033891	ENSGALG00000001454	12	0.984	NA
ptr_retrop05709	ptr_retrop05709	12	95925275	95926025	+	ENSPTRP00000004915	ENSPTRG00000002807	10	0.853	0.1523
ptr_retrom06045	ptr_retrom06045	12	97148446	97149153	-	ENSPTRP00000023661	ENSPTRG00000013737	20	0.664	13.1139
ptr_retrom06047	ptr_retrom06047	12	97996536	97997212	-	ENSPTRP00000007407	ENSPTRG00000004318	11	0.74	0.2626
ptriretrop21038	ptriretrop21038	12	98342224	98342482	+	ENSMUSP00000038943	ENSMUSG00000041571	7	0.621	NA
ptriretrop21039	ptriretrop21039	12	98587682	98588255	+	ENSGALP00000021084	ENSGALG00000012946	1	0.728	NA
ptriretrom21470	ptriretrom21470	12	98725268	98727319	-	ENSMUSP00000111051	ENSMUSG00000037341	X	0.858	NA
ptr_retrom06052	ptr_retrom06052	12	98863945	98864424	-	ENSPTRP00000042839	ENSPTRG00000023064	7	0.866	0.1254
ptr_retrop05710	ptr_retrop05710	12	99073302	99073651	+	ENSPTRP00000012123	ENSPTRG00000007094	15	0.898	0.0264
ptriretrom21500	ptriretrom21500	12	100229517	100229887	-	ENSGGOP00000026272	ENSGGOG00000006432	2a	0.738	NA
ptr_retrom06058	ptr_retrom06058	12	100301688	100302474	-	ENSPTRP00000037867	ENSPTRG00000022025	X	0.871	0.1074
ptr_retrop05712	ptr_retrop05712	12	100877434	100878883	+	ENSPTRP00000037149	ENSPTRG00000021684	X	0.864	0.1373
ptr_retrop05714	ptr_retrop05714	12	101367897	101368839	+	ENSPTRP00000052352	ENSPTRG00000013278	20	0.879	0.0758
ptr_retrom06059	ptr_retrom06059	12	101529774	101530452	-	ENSPTRP00000060553	ENSPTRG00000039153	9	0.694	0.2899
ptriretrom21525	ENSPTRT00000060122	12	102178865	102179170	-	ENSMUSP00000074724	ENSMUSG00000073676	1	0.902	NA
ptriretrop21104	ptriretrop21104	12	104557335	104557869	+	ENSGALP00000000205	ENSGALG00000000150	4	0.759	NA
ptr_retrop05720	ptr_retrop05720	12	104616914	104617855	+	ENSPTRP00000005315	ENSPTRG00000003006	10	0.522	0.9508
ptr_retrop05722	ptr_retrop05722	12	104831279	104831686	+	ENSPTRP00000044536	ENSPTRG00000009364	17	0.824	0.0801
ptr_retrom06061	ptr_retrom06061	12	105300792	105301837	-	ENSPTRP00000008508	ENSPTRG00000004996	12	0.867	0.1326
ptriretrop21143	ptriretrop21143	12	106361920	106363000	+	ENSP00000216218	ENSG00000100380	22	0.883	NA
ptriretrop21153	NA	12	107264684	107265011	+	ENSGALP00000013355	ENSGALG00000008212	2	0.755	NA
ptr_retrop05726	ptr_retrop05726	12	108085313	108085767	+	ENSPTRP00000017019	ENSPTRG00000010012	18	0.808	0.2676
ptriretrom21569	ptriretrom21569	12	108267479	108267981	-	ENSMMUP00000032895	ENSMMUG00000019916	4	0.869	NA
ptr_retrom06066	ptr_retrom06066	12	108656498	108657614	-	ENSPTRP00000024776	ENSPTRG00000014384	22	0.546	0.3135
ptriretrop21207	ptriretrop21207	12	110872776	110873150	+	ENSGALP00000027030	ENSGALG00000016775	1	0.928	NA
ptriretrom21599	ptriretrom21599	12	112115253	112115556	-	ENSMUSP00000112565	ENSMUSG00000071533	16	0.833	NA
ptriretrom21606	ptriretrom21606	12	112325433	112325991	-	ENSGGOP00000021640	ENSGGOG00000009371	16	0.576	NA
ptriretrom21610	ptriretrom21610	12	112472416	112472661	-	ENSP00000256433	ENSG00000134049	18	0.866	NA
ptriretrom21619	ptriretrom21619	12	112779482	112780245	-	ENSMMUP00000029411	ENSMMUG00000022341	15	0.914	NA
ptr_retrop05736	ptr_retrop05736	12	113501599	113502084	+	ENSPTRP00000006031	ENSPTRG00000003472	11	0.867	0.0648
ptr_retrop05738	ptr_retrop05738	12	113541012	113541341	+	ENSPTRP00000013350	ENSPTRG00000007823	16	0.704	0.5209
ptr_retrop05739	ptr_retrop05739	12	115073911	115074471	+	ENSPTRP00000035955	ENSPTRG00000021031	9	0.851	0.1819
ptr_retrom06075	ptr_retrom06075	12	116093030	116093401	-	ENSPTRP00000060271	ENSPTRG00000039223	19	0.833	0.3389
ptr_retrop05744	ENSPTRT00000024930	12	117099415	117099789	+	ENSPTRP00000014400	ENSPTRG00000008445	16	0.992	0.0125
ptr_retrom06077	ptr_retrom06077	12	119295724	119296271	-	ENSPTRP00000017019	ENSPTRG00000010012	18	0.747	0.3122
ptr_retrop05748	ENSPTRT00000036001	12	119751169	119751552	+	ENSPTRP00000061241	ENSPTRG00000041711	7	0.937	0.0428
ptr_retrop05753	ENSPTRT00000010147	12	120877235	120877705	+	ENSPTRP00000015997	ENSPTRG00000009415	17	0.821	1.4855
ptriretrom21676	ptriretrom21676	12	121053352	121053612	-	ENSP00000408172	ENSG00000071082	2	0.759	NA
ptriretrom21684	ptriretrom21684	12	121208867	121209361	-	ENSMMUP00000003295	ENSMMUG00000002445	1	0.76	NA
ptr_retrom06083	ptr_retrom06083	12	121469073	121469608	-	ENSPTRP00000003488	ENSPTRG00000002066	1	0.821	0.3049
ptr_retrop05761	ptr_retrop05761	12	121535453	121536172	+	ENSPTRP00000030690	ENSPTRG00000017982	6	0.854	0.1572
ptr_retrop05763	ptr_retrop05763	12	121537784	121538275	+	ENSPTRP00000038960	ENSPTRG00000022808	9	0.909	0.1305
ptr_retrom06085	ENSPTRT00000074559	12	122363171	122363506	-	ENSPTRP00000020748	ENSPTRG00000033835	2A	0.991	0
ptriretrop21399	ptriretrop21399	12	123198315	123198684	+	ENSGGOP00000002951	ENSGGOG00000003002	13	0.952	NA
ptr_retrom06090	ptr_retrom06090	12	125814472	125814767	-	ENSPTRP00000026873	ENSPTRG00000015620	3	0.697	5.9958
ptriretrop21430	ptriretrop21430	12	127411522	127411850	+	ENSPPYP00000020142	ENSPPYG00000017956	7	0.695	NA
ptriretrop21436	ptriretrop21436	12	127811795	127811980	+	ENSMODP00000015398	ENSMODG00000012295	4	0.774	NA
ptr_retrom06091	ptr_retrom06091	12	129866476	129866988	-	ENSPTRP00000035487	ENSPTRG00000020742	9	0.838	0.0793
ptriretrom21780	ptriretrom21780	12	131151712	131152028	-	ENSMMUP00000028078	ENSMMUG00000021314	8	0.623	NA
ptriretrop21459	ptriretrop21459	12	131324653	131325201	+	ENSP00000262225	ENSG00000086598	12	1	NA
ptr_retrom06092	ptr_retrom06092	12	131782766	131783719	-	ENSPTRP00000027640	ENSPTRG00000016070	4	0.997	0
ptr_retrom06093	ptr_retrom06093	12	132257502	132258181	-	ENSPTRP00000060553	ENSPTRG00000039153	9	0.8	0.2516
ptriretrom21808	ptriretrom21808	12	133118635	133118916	-	ENSMMUP00000029368	ENSMMUG00000022311	5	0.865	NA
ptr_retrop05779	ptr_retrop05779	12	133838376	133838858	+	ENSPTRP00000019397	ENSPTRG00000011299	19	0.919	0.0577
ptr_retrop05784	ptr_retrop05784	12	134046281	134046732	+	ENSPTRP00000000818	ENSPTRG00000000467	1	0.776	0.2304
ptriretrop21509	ptriretrop21509	12	134130718	134131062	+	ENSGALP00000006308	ENSGALG00000003966	19	0.729	NA
ptr_retrop04040	ptr_retrop04040	13	18091093	18092144	+	ENSPTRP00000023770	ENSPTRG00000013795	21	0.94	0.0512
ptriretrop14986	ptriretrop14986	13	18191706	18192917	+	ENSP00000276602	ENSG00000147601	8	0.941	NA
ptriretrop14990	ptriretrop14990	13	18208306	18208812	+	ENSP00000380926	ENSG00000160256	21	0.959	NA
ptr_retrom04311	ptr_retrom04311	13	18239839	18241034	-	ENSPTRP00000008264	ENSPTRG00000004836	12	0.807	0.1671
ptriretrop14994	ptriretrop14994	13	18242166	18242990	+	ENSP00000263097	ENSG00000064666	19	0.845	NA
ptr_retrom04314	ptr_retrom04314	13	18412605	18414812	-	ENSPTRP00000007677	ENSPTRG00000004487	11	0.855	0.1091
ptr_retrom04316	ptr_retrom04316	13	18827743	18828777	-	ENSPTRP00000026531	ENSPTRG00000015396	3	0.905	0.0835
ptriretrop15004	ptriretrop15004	13	18906207	18906867	+	ENSP00000384396	ENSG00000147382	X	0.919	NA
ptr_retrom04318	ptr_retrom04318	13	19079015	19080041	-	ENSPTRP00000006596	ENSPTRG00000003833	11	0.897	0.0872
ptr_retrom04319	ptr_retrom04319	13	19082588	19083896	-	ENSPTRP00000011983	ENSPTRG00000007010	15	0.904	0.0664
ptr_retrom04324	ptr_retrom04324	13	19707716	19708197	-	ENSPTRP00000042839	ENSPTRG00000023064	7	0.727	0.2403
ptr_retrop04047	ptr_retrop04047	13	20139453	20140507	+	ENSPTRP00000039053	ENSPTRG00000010648	19	0.841	0.332
ptr_retrop04050	ptr_retrop04050	13	20500341	20501184	+	ENSPTRP00000025475	ENSPTRG00000022841	3	0.979	0.0359
ptr_retrom04331	ptr_retrom04331	13	20635499	20635867	-	ENSPTRP00000031780	ENSPTRG00000018618	6	0.886	0.0791
ptr_retrop04052	ptr_retrop04052	13	20833960	20835626	+	ENSPTRP00000027312	ENSPTRG00000015853	4	0.62	28.4089
ptriretrop15057	ptriretrop15057	13	20874175	20874631	+	ENSOANP00000007123	ENSOANG00000004492	Ultra687	0.652	NA
ptr_retrom04334	ENSPTRT00000063880	13	21145297	21145878	-	ENSPTRP00000019976	ENSPTRG00000011615	2A	0.979	0.0521
ptr_retrom04336	ptr_retrom04336	13	22223960	22224490	-	ENSPTRP00000019324	ENSPTRG00000011268	19	0.532	3.5535
ptriretrom15066	ptriretrom15066	13	22233152	22234203	-	ENSMUSP00000105435	ENSMUSG00000005481	8	0.69	NA
ptr_retrom04340	ptr_retrom04340	13	22363718	22364893	-	ENSPTRP00000004336	ENSPTRG00000002516	10	0.903	0.0759
ptr_retrop04053	ptr_retrop04053	13	22376736	22377143	+	ENSPTRP00000048346	ENSPTRG00000017085	5	0.926	0.087
ptr_retrop04055	ptr_retrop04055	13	22444714	22445554	+	ENSPTRP00000031668	ENSPTRG00000018547	6	0.908	0.1072
ptr_retrop04060	ptr_retrop04060	13	23883494	23884140	+	ENSPTRP00000031668	ENSPTRG00000018547	6	0.931	0.1137
ptriretrom15106	ptriretrom15106	13	24234343	24234726	-	ENSMUSP00000129072	ENSMUSG00000060938	11	0.654	NA
ptr_retrom04346	ptr_retrom04346	13	24524370	24524717	-	ENSPTRP00000039611	ENSPTRG00000016353	4	0.855	0.0486
ptr_retrop04066	ENSPTRT00000045156	13	24635501	24637399	+	ENSPTRP00000023243	ENSPTRG00000013531	20	0.665	64.4079
ptr_retrom04348	ptr_retrom04348	13	24911473	24911826	-	ENSPTRP00000013091	ENSPTRG00000007663	16	0.881	0.2288
ptriretrom15135	ptriretrom15135	13	25668484	25669315	-	ENSP00000302092	ENSG00000143363	1	0.843	NA
ptr_retrop04072	ptr_retrop04072	13	26535826	26536019	+	ENSPTRP00000023600	ENSPTRG00000013708	20	0.677	0.3045
ptr_retrom04352	ptr_retrom04352	13	26578952	26579266	-	ENSPTRP00000034700	ENSPTRG00000020264	8	0.79	0.182
ptriretrop15155	ENSPTRT00000060269	13	27209652	27209966	+	ENSOANP00000013871	ENSOANG00000008708	Ultra519	0.819	NA
ptriretrom15169	ptriretrom15169	13	27290322	27291130	-	ENSGGOP00000007063	ENSGGOG00000007220	5	0.77	NA
ptr_retrop04077	ptr_retrop04077	13	27812833	27814115	+	ENSPTRP00000045593	ENSPTRG00000018347	6	0.818	0.1492
ptr_retrop04079	ptr_retrop04079	13	28201330	28202545	+	ENSPTRP00000014825	ENSPTRG00000008694	17	0.894	0.1156
ptr_retrop04081	ptr_retrop04081	13	28915563	28916567	+	ENSPTRP00000007822	ENSPTRG00000004577	12	0.845	0.2116
ptr_retrop04087	ptr_retrop04087	13	29908313	29908906	+	ENSPTRP00000017998	ENSPTRG00000010541	19	0.848	0.166
ptr_retrop04089	ptr_retrop04089	13	30042250	30042711	+	ENSPTRP00000006324	ENSPTRG00000003661	GL391837.1	0.553	34.0326
ptr_retrop04091	ptr_retrop04091	13	30167531	30168661	+	ENSPTRP00000016819	ENSPTRG00000009884	18	0.895	0.067
ptr_retrop04092	ptr_retrop04092	13	30260365	30260588	+	ENSPTRP00000020652	ENSPTRG00000012029	2A	0.693	0.1827
ptriretrom15208	ptriretrom15208	13	32140245	32140473	-	ENSP00000325562	ENSG00000173436	1	0.808	NA
ptr_retrom04357	ptr_retrom04357	13	32598345	32598695	-	ENSPTRP00000024762	ENSPTRG00000014374	22	0.746	0.4666
ptr_retrom04383	ptr_retrom04383	13	36563209	36564414	-	ENSPTRP00000014825	ENSPTRG00000008694	17	0.864	0.145
ptr_retrom04388	ENSPTRT00000010656	13	36732642	36733544	-	ENSPTRP00000040515	ENSPTRG00000014365	22	0.723	81.7705
ptriretrom15276	NA	13	37643193	37644755	-	ENSMODP00000015389	ENSMODG00000012289	4	0.728	NA
ptr_retrom04390	ptr_retrom04390	13	38271629	38272189	-	ENSPTRP00000005275	ENSPTRG00000002992	10	0.635	0.3165
ptr_retrom04393	ENSPTRT00000010743	13	45066939	45067847	-	ENSPTRP00000033676	ENSPTRG00000019668	7	0.614	64.3754
ptr_retrop04100	ptr_retrop04100	13	46194319	46194639	+	ENSPTRP00000022531	ENSPTRG00000013163	20	0.804	0.1183
ptriretrop15308	NA	13	47468932	47469647	+	ENSMMUP00000039130	ENSMMUG00000015583	11	0.896	NA
ptr_retrom04395	ptr_retrom04395	13	47471832	47472252	-	ENSPTRP00000005825	ENSPTRG00000003333	11	0.757	0.3056
ptr_retrom04396	ptr_retrom04396	13	47613165	47614536	-	ENSPTRP00000018507	ENSPTRG00000010813	19	0.976	0.0133
ptr_retrop04103	ptr_retrop04103	13	48481701	48482399	+	ENSPTRP00000010517	ENSPTRG00000006196	14	0.887	0.0737
ptr_retrop04105	ptr_retrop04105	13	49610772	49613027	+	ENSPTRP00000010683	ENSPTRG00000006297	14	0.874	0.1196
ptr_retrop04108	ptr_retrop04108	13	49824758	49825296	+	ENSPTRP00000019289	ENSPTRG00000011245	19	0.715	0.4416
ptriretrop15361	ptriretrop15361	13	49897273	49898368	+	ENSP00000216218	ENSG00000100380	22	0.94	NA
ptr_retrom04404	ptr_retrom04404	13	50090642	50090983	-	ENSPTRP00000039611	ENSPTRG00000016353	4	0.833	0.0412
ptriretrom15367	NA	13	50891188	50891804	-	ENSMUSP00000123474	ENSMUSG00000058558	5	0.795	NA
ptr_retrop04112	ptr_retrop04112	13	51190678	51191452	+	ENSPTRP00000037867	ENSPTRG00000022025	X	0.884	0.0894
ptr_retrom04407	ptr_retrom04407	13	51225163	51225388	-	ENSPTRP00000020652	ENSPTRG00000012029	2A	0.747	0.1969
ptr_retrom04408	ptr_retrom04408	13	51645810	51647931	-	ENSPTRP00000010683	ENSPTRG00000006297	14	0.879	0.0937
ptr_retrop04116	ptr_retrop04116	13	51704016	51704420	+	ENSPTRP00000034854	ENSPTRG00000020373	8	0.941	0.0431
ptr_retrop04117	ptr_retrop04117	13	51765899	51767659	+	ENSPTRP00000047268	ENSPTRG00000022262	X	0.912	0.0825
ptriretrop15393	ENSPTRT00000010843	13	52290950	52291330	+	ENSOANP00000021620	ENSOANG00000013708	Contig30988	0.945	NA
ptr_retrop04119	ptr_retrop04119	13	52470131	52470649	+	ENSPTRP00000042839	ENSPTRG00000023064	7	0.828	0.1465
ptriretrop15414	ENSPTRT00000076261	13	53260331	53261314	+	ENSP00000385763	ENSG00000106853	9	0.924	NA
ptriretrop15420	ptriretrop15420	13	53651779	53652165	+	ENSP00000389103	ENSG00000198242	17	0.992	NA
ptr_retrom04414	ptr_retrom04414	13	54116181	54116789	-	ENSPTRP00000019396	ENSPTRG00000011298	19	0.985	0.0438
ptr_retrom04415	ptr_retrom04415	13	55666585	55667759	-	ENSPTRP00000058378	ENSPTRG00000020357	8	0.751	0.1872
ptr_retrop04126	ptr_retrop04126	13	56975713	56976410	+	ENSPTRP00000028544	ENSPTRG00000016646	4	0.679	63.077
ptriretrop15454	ptriretrop15454	13	58212603	58214264	+	ENSPPYP00000006556	ENSPPYG00000005768	14	0.859	NA
ptriretrom15426	ptriretrom15426	13	58429961	58430541	-	ENSMUSP00000118294	ENSMUSG00000028410	4	0.754	NA
ptriretrop15456	ptriretrop15456	13	59962622	59963394	+	ENSMUSP00000101324	ENSMUSG00000041459	4	0.891	NA
ptr_retrom04417	ptr_retrom04417	13	60328954	60330162	-	ENSPTRP00000014825	ENSPTRG00000008694	17	0.85	0.146
ptriretrom15454	ptriretrom15454	13	63519520	63520122	-	ENSP00000328178	ENSG00000184203	3	0.84	NA
ptr_retrom04420	ptr_retrom04420	13	64670388	64671690	-	ENSPTRP00000011347	ENSPTRG00000006655	14	0.899	0.1424
ptr_retrom04424	ptr_retrom04424	13	67009294	67010112	-	ENSPTRP00000025475	ENSPTRG00000022841	3	0.892	0.09
ptriretrom15488	ptriretrom15488	13	67604532	67605242	-	ENSPPYP00000017949	ENSPPYG00000016037	5	0.847	NA
ptr_retrom04426	ptr_retrom04426	13	68139122	68139397	-	ENSPTRP00000059851	ENSPTRG00000016822	5	0.51	0.62
ptr_retrop04142	ptr_retrop04142	13	68469266	68469678	+	ENSPTRP00000038960	ENSPTRG00000022808	9	0.679	0.4363
ptr_retrop04143	ptr_retrop04143	13	68785128	68786200	+	ENSPTRP00000009711	ENSPTRG00000005695	13	0.908	0.0688
ptr_retrom04427	ptr_retrom04427	13	69710155	69711317	-	ENSPTRP00000011273	ENSPTRG00000006623	14	0.721	0.1944
ptr_retrop04151	ptr_retrop04151	13	71530304	71530714	+	ENSPTRP00000016407	ENSPTRG00000009655	17	0.978	10.9881
ptr_retrop04159	ptr_retrop04159	13	71559874	71560345	+	ENSPTRP00000009758	ENSPTRG00000005728	13	0.769	0.1145
ptr_retrop04163	ptr_retrop04163	13	72577548	72577998	+	ENSPTRP00000009758	ENSPTRG00000005728	13	0.831	0.3562
ptriretrop15524	ptriretrop15524	13	72914770	72915185	+	ENSP00000354906	ENSG00000101843	X	0.899	NA
ptr_retrom04432	ptr_retrom04432	13	72980241	72980645	-	ENSPTRP00000034854	ENSPTRG00000020373	8	0.933	0.0183
ptr_retrom04434	ptr_retrom04434	13	74271195	74271550	-	ENSPTRP00000009758	ENSPTRG00000005728	13	0.697	0.206
ptr_retrop04164	ptr_retrop04164	13	74729673	74731175	+	ENSPTRP00000016866	ENSPTRG00000009918	18	0.688	0.1937
ptr_retrom04435	ptr_retrom04435	13	75152433	75154200	-	ENSPTRP00000010683	ENSPTRG00000006297	14	0.855	0.1102
ptriretrop15537	ptriretrop15537	13	76859200	76859571	+	ENSP00000338516	ENSG00000145741	5	0.841	NA
ptriretrom15564	ptriretrom15564	13	76913322	76914055	-	ENSGGOP00000021992	ENSGGOG00000008034	8	0.893	NA
ptr_retrop04165	ptr_retrop04165	13	76917009	76920496	+	ENSPTRP00000002937	ENSPTRG00000001759	1	0.898	0.1008
ptriretrop15557	ptriretrop15557	13	78400349	78400627	+	ENSMMUP00000012930	ENSMMUG00000009873	13	0.702	NA
ptr_retrop04168	ptr_retrop04168	13	78743331	78743684	+	ENSPTRP00000009758	ENSPTRG00000005728	13	0.847	0.0993
ptriretrop15580	ptriretrop15580	13	78832308	78833959	+	ENSPPYP00000014577	ENSPPYG00000013046	2b	0.789	NA
ptr_retrop04169	ptr_retrop04169	13	78892703	78894322	+	ENSPTRP00000028695	ENSPTRG00000016725	5	0.846	0.1261
ptr_retrop04170	ptr_retrop04170	13	79156542	79157210	+	ENSPTRP00000001951	ENSPTRG00000001136	1	0.773	0.1546
ptr_retrop04175	ptr_retrop04175	13	80912865	80913378	+	ENSPTRP00000025997	ENSPTRG00000015051	3	0.721	0.3041
ptr_retrop04176	ptr_retrop04176	13	81303017	81303316	+	ENSPTRP00000060206	ENSPTRG00000014802	3	0.747	0.2251
ptriretrop15615	ptriretrop15615	13	82858038	82858993	+	ENSP00000296048	ENSG00000163754	3	0.803	NA
ptr_retrop04182	ptr_retrop04182	13	84048112	84048447	+	ENSPTRP00000004338	ENSPTRG00000002518	10	0.568	2.4594
ptriretrop15639	ptriretrop15639	13	87276628	87276853	+	ENSP00000408482	ENSG00000143947	2	0.842	NA
ptriretrom15615	ptriretrom15615	13	88318241	88318429	-	ENSGALP00000033891	ENSGALG00000001454	12	0.698	NA
ptr_retrom04446	ptr_retrom04446	13	89482891	89485010	-	ENSPTRP00000021610	ENSPTRG00000012647	2B	0.852	0.1016
ptr_retrom04447	ptr_retrom04447	13	89975977	89976711	-	ENSPTRP00000031053	ENSPTRG00000018175	6	0.841	0.0641
ptr_retrop04184	ptr_retrop04184	13	90138088	90139139	+	ENSPTRP00000015385	ENSPTRG00000009020	17	0.856	0.0834
ptriretrop15654	NA	13	90314775	90315819	+	ENSGALP00000036483	ENSGALG00000017291	1	0.619	NA
ptr_retrop04187	ptr_retrop04187	13	90373954	90375249	+	ENSPTRP00000008508	ENSPTRG00000004996	12	0.834	0.2388
ptr_retrom04450	ptr_retrom04450	13	91440938	91441431	-	ENSPTRP00000042839	ENSPTRG00000023064	7	0.848	0.126
ptriretrom15646	ptriretrom15646	13	93576242	93577072	-	ENSMMUP00000017057	ENSMMUG00000012989	11	0.683	NA
ptr_retrop04188	ptr_retrop04188	13	94794187	94794438	+	ENSPTRP00000048498	ENSPTRG00000028890	19	0.762	0.2633
ptr_retrom04453	ptr_retrom04453	13	94946493	94946876	-	ENSPTRP00000009758	ENSPTRG00000005728	13	0.765	0.202
ptr_retrop04189	ptr_retrop04189	13	96771216	96772060	+	ENSPTRP00000021300	ENSPTRG00000012437	2B	0.727	0.159
ptr_retrom04455	ptr_retrom04455	13	97084534	97086299	-	ENSPTRP00000031135	ENSPTRG00000018217	6	0.782	0.26
ptr_retrop04192	ptr_retrop04192	13	97690313	97691006	+	ENSPTRP00000010633	ENSPTRG00000006264	14	0.784	0.1793
ptriretrop15703	ptriretrop15703	13	98108278	98108833	+	ENSP00000361071	ENSG00000148303	9	0.647	NA
ptriretrom15701	ptriretrom15701	13	98836832	98837387	-	ENSGALP00000023987	ENSGALG00000014899	3	0.711	NA
ptr_retrom04464	ptr_retrom04464	13	98870202	98870628	-	ENSPTRP00000020427	ENSPTRG00000011901	2A	0.831	0.0959
ptr_retrom04465	ptr_retrom04465	13	99185478	99186168	-	ENSPTRP00000031053	ENSPTRG00000018175	6	0.862	0.0981
ptr_retrom04466	ENSPTRT00000072977	13	99391131	99392546	-	ENSPTRP00000052652	ENSPTRG00000009790	17	0.998	0.0074
ptr_retrom04469	ptr_retrom04469	13	99456349	99456711	-	ENSPTRP00000028020	ENSPTRG00000016312	4	0.91	0.0468
ptriretrop15713	ptriretrop15713	13	99610664	99611129	+	ENSGGOP00000022203	ENSGGOG00000027164	X	0.584	NA
ptr_retrom04474	ptr_retrom04474	13	100402078	100402689	-	ENSPTRP00000025346	ENSPTRG00000014695	3	0.897	0.0274
ptr_retrom04476	ptr_retrom04476	13	100888845	100889116	-	ENSPTRP00000021006	ENSPTRG00000012257	2A	0.703	0.1731
ptr_retrom04479	ptr_retrom04479	13	101017304	101017803	-	ENSPTRP00000025997	ENSPTRG00000015051	3	0.753	0.1955
ptr_retrop04195	ptr_retrop04195	13	102078474	102078957	+	ENSPTRP00000038541	ENSPTRG00000022371	X	0.676	0.379
ptriretrop15742	ptriretrop15742	13	105131035	105131769	+	ENSGGOP00000021992	ENSGGOG00000008034	8	0.786	NA
ptr_retrop04197	ptr_retrop04197	13	106774513	106774862	+	ENSPTRP00000036507	ENSPTRG00000021361	9	0.812	0.2316
ptr_retrop04198	ptr_retrop04198	13	107011207	107011614	+	ENSPTRP00000044536	ENSPTRG00000009364	17	0.824	0.0572
ptr_retrom04488	ptr_retrom04488	13	107220861	107221328	-	ENSPTRP00000042839	ENSPTRG00000023064	7	0.768	0.1848
ptr_retrom04493	ptr_retrom04493	13	111157286	111157701	-	ENSPTRP00000009758	ENSPTRG00000005728	13	0.842	0.1185
ptr_retrom03562	ptr_retrom03562	14	18438356	18439677	-	ENSPTRP00000039339	ENSPTRG00000018890	7	0.896	0.3989
ptr_retrom03563	ptr_retrom03563	14	18439964	18440706	-	ENSPTRP00000051059	ENSPTRG00000006890	15	0.871	1.2195
ptriretrop12004	ptriretrop12004	14	18572839	18573696	+	ENSP00000440237	ENSG00000117650	1	0.889	NA
ptriretrop12022	ptriretrop12022	14	18632984	18634127	+	ENSMMUP00000029758	ENSMMUG00000022603	14	0.904	NA
ptriretrom11938	ptriretrom11938	14	18843184	18843625	-	ENSP00000440307	ENSG00000069849	3	0.596	NA
ptr_retrop03556	ENSPTRT00000074433	14	19345222	19345938	+	ENSPTRP00000043513	ENSPTRG00000013661	20	0.967	0.047
ptr_retrom03603	ptr_retrom03603	14	19451420	19452066	-	ENSPTRP00000036650	ENSPTRG00000021436	9	0.817	0.1188
ptr_retrop03575	ptr_retrop03575	14	20047424	20048612	+	ENSPTRP00000046617	ENSPTRG00000022902	17	0.851	0.093
ptriretrom12036	ptriretrom12036	14	20236128	20236505	-	ENSGALP00000027030	ENSGALG00000016775	1	0.968	NA
ptriretrop12233	ptriretrop12233	14	20290862	20291176	+	ENSP00000396910	ENSG00000221983	19	0.81	NA
ptr_retrop03578	ptr_retrop03578	14	20458359	20459608	+	ENSPTRP00000047486	ENSPTRG00000021702	X	0.827	23.4455
ptriretrom12060	ptriretrom12060	14	20480415	20481221	-	ENSP00000443446	ENSG00000115091	2	0.747	NA
ptr_retrom03642	ptr_retrom03642	14	20507243	20507698	-	ENSPTRP00000009000	ENSPTRG00000005297	12	0.895	0.0678
ptr_retrom03649	ptr_retrom03649	14	20547944	20548506	-	ENSPTRP00000013352	ENSPTRG00000007824	16	0.761	0.2232
ptr_retrop03591	ptr_retrop03591	14	20651239	20652048	+	ENSPTRP00000060165	ENSPTRG00000007195	15	0.817	0.1289
ptr_retrom03660	ptr_retrom03660	14	21588031	21588465	-	ENSPTRP00000014891	ENSPTRG00000008742	17	0.821	0.2461
ptriretrop12539	ENSPTRT00000008748	14	22116206	22116670	+	ENSP00000379513	ENSG00000008394	12	1	NA
ptr_retrop03618	ptr_retrop03618	14	22637991	22639667	+	ENSPTRP00000013832	ENSPTRG00000008103	16	0.757	0.1815
ptriretrom12199	ptriretrom12199	14	24114559	24114828	-	ENSGGOP00000000955	ENSGGOG00000000971	1	0.967	NA
ptriretrom12205	NA	14	24279321	24280358	-	ENSMMUP00000020139	ENSMMUG00000015359	5	0.713	NA
ptr_retrop03622	ptr_retrop03622	14	25060080	25060471	+	ENSPTRP00000017180	ENSPTRG00000010111	18	0.72	0.5463
ptriretrop12626	ptriretrop12626	14	25418112	25418636	+	ENSP00000397358	ENSG00000117419	1	0.994	NA
ptr_retrom03670	ptr_retrom03670	14	26124433	26124875	-	ENSPTRP00000020489	ENSPTRG00000011928	2A	0.703	0.3516
ptr_retrom03672	ptr_retrom03672	14	27524273	27524761	-	ENSPTRP00000029082	ENSPTRG00000016979	5	0.811	0.094
ptr_retrom03674	ptr_retrom03674	14	29558841	29559391	-	ENSPTRP00000023301	ENSPTRG00000013564	20	0.796	0.27
ptr_retrop03624	ptr_retrop03624	14	29664364	29664750	+	ENSPTRP00000038960	ENSPTRG00000022808	9	0.767	0.2569
ptr_retrop03625	ptr_retrop03625	14	29696946	29697351	+	ENSPTRP00000015712	ENSPTRG00000009232	17	0.846	0.1675
ptr_retrop03628	ptr_retrop03628	14	29840645	29840928	+	ENSPTRP00000060206	ENSPTRG00000014802	3	0.705	0.2677
ptr_retrom03675	ptr_retrom03675	14	30203562	30203969	-	ENSPTRP00000044536	ENSPTRG00000009364	17	0.846	0.0639
ptriretrom12258	ptriretrom12258	14	30348517	30349053	-	ENSPPYP00000016394	ENSPPYG00000014675	4	0.81	NA
ptriretrop12678	ptriretrop12678	14	33383659	33384021	+	ENSGALP00000006308	ENSGALG00000003966	19	0.835	NA
ptr_retrom03679	ptr_retrom03679	14	33467700	33468137	-	ENSPTRP00000018953	ENSPTRG00000011037	19	0.911	0.0754
ptriretrop12686	ptriretrop12686	14	33594155	33594508	+	ENSGALP00000006308	ENSGALG00000003966	19	0.839	NA
ptr_retrom03681	ptr_retrom03681	14	33642623	33643117	-	ENSPTRP00000038960	ENSPTRG00000022808	9	0.976	0.0711
ptriretrop12696	ptriretrop12696	14	33843984	33844994	+	ENSMMUP00000018308	ENSMMUG00000013929	X	0.879	NA
ptriretrom12289	ptriretrom12289	14	34054737	34055109	-	ENSP00000389103	ENSG00000198242	17	0.609	NA
ptriretrop12706	ptriretrop12706	14	34185468	34186039	+	ENSMUSP00000109399	ENSMUSG00000047215	5	0.885	NA
ptriretrom12311	ptriretrom12311	14	34316127	34316949	-	ENSGGOP00000026220	ENSGGOG00000026582	12	0.843	NA
ptriretrop12713	ptriretrop12713	14	34406763	34407336	+	ENSGALP00000016361	ENSGALG00000010077	4	0.788	NA
ptr_retrom03685	ptr_retrom03685	14	34450167	34451425	-	ENSPTRP00000008508	ENSPTRG00000004996	12	0.783	0.2911
ptr_retrop03640	ptr_retrop03640	14	34705818	34707073	+	ENSPTRP00000031534	ENSPTRG00000018462	6	0.832	0.1479
ptriretrop12737	ptriretrop12737	14	34759418	34759831	+	ENSP00000219169	ENSG00000102898	16	0.929	NA
ptr_retrop03642	ptr_retrop03642	14	35319267	35319742	+	ENSPTRP00000007885	ENSPTRG00000004617	12	0.987	0.0404
ptriretrom12331	ptriretrom12331	14	35524290	35524477	-	ENSGALP00000033891	ENSGALG00000001454	12	0.873	NA
ptr_retrop03649	ptr_retrop03649	14	37718926	37720127	+	ENSPTRP00000008490	ENSPTRG00000020404	12	0.597	103.706
ptr_retrop03650	ptr_retrop03650	14	38104288	38104769	+	ENSPTRP00000042839	ENSPTRG00000023064	7	0.848	0.1192
ptriretrop12786	ptriretrop12786	14	38154456	38155171	+	ENSMMUP00000029411	ENSMMUG00000022341	15	0.812	NA
ptriretrom12361	ptriretrom12361	14	38158982	38159277	-	ENSMUSP00000125754	ENSMUSG00000060743	1	0.727	NA
ptr_retrop03653	ptr_retrop03653	14	38210281	38210688	+	ENSPTRP00000015955	ENSPTRG00000009394	17	0.779	0.1387
ptr_retrom03694	ptr_retrom03694	14	40364384	40364800	-	ENSPTRP00000029578	ENSPTRG00000017303	5	0.676	1.223
ptriretrop12804	ptriretrop12804	14	40550988	40551254	+	ENSP00000371134	ENSG00000088832	20	0.58	NA
ptriretrom12380	ptriretrom12380	14	41657141	41657564	-	ENSP00000443226	ENSG00000134308	2	0.669	NA
ptriretrom12390	ptriretrom12390	14	42993001	42993549	-	ENSP00000228136	ENSG00000110696	11	0.923	NA
ptriretrom12392	ptriretrom12392	14	43166080	43166474	-	ENSP00000427801	ENSG00000164924	8	0.733	NA
ptr_retrom03696	ENSPTRT00000075079	14	43775986	43776183	-	ENSPTRP00000043331	ENSPTRG00000010668	19	0.939	0.0951
ptr_retrop03660	ptr_retrop03660	14	44186733	44187080	+	ENSPTRP00000050931	ENSPTRG00000030046	3	0.966	0.0283
ptriretrom12424	ENSPTRT00000011557	14	45543641	45544282	-	ENSP00000413436	ENSG00000147403	X	0.958	NA
ptriretrop12840	ptriretrop12840	14	45892039	45892733	+	ENSP00000363021	ENSG00000117748	1	0.651	NA
ptr_retrom03703	ptr_retrom03703	14	46343013	46343397	-	ENSPTRP00000013350	ENSPTRG00000007823	16	0.7	0.3195
ptr_retrop03661	ptr_retrop03661	14	47368341	47368890	+	ENSPTRP00000019289	ENSPTRG00000011245	19	0.656	0.6289
ptr_retrop03663	ptr_retrop03663	14	48275527	48275965	+	ENSPTRP00000008549	ENSPTRG00000005023	12	0.816	0.157
ptriretrom12450	ptriretrom12450	14	48478691	48479090	-	ENSP00000380156	ENSG00000144713	3	0.756	NA
ptr_retrop03674	ptr_retrop03674	14	48502090	48502638	+	ENSPTRP00000010893	ENSPTRG00000006424	14	0.816	65.0501
ptriretrom12454	ENSPTRT00000011564	14	48520901	48521218	-	ENSPPYP00000023470	ENSPPYG00000025837	X	0.991	NA
ptr_retrop03675	ptr_retrop03675	14	48580160	48581067	+	ENSPTRP00000045362	ENSPTRG00000012948	2B	0.787	0.218
ptr_retrop03681	ENSPTRT00000011579	14	48809129	48809653	+	ENSPTRP00000033647	ENSPTRG00000019651	7	0.671	90.1526
ptr_retrop03682	ptr_retrop03682	14	48970059	48970931	+	ENSPTRP00000004858	ENSPTRG00000002783	10	0.855	0.1244
ptr_retrop03684	ptr_retrop03684	14	48972822	48973138	+	ENSPTRP00000013350	ENSPTRG00000007823	16	0.682	0.2482
ptr_retrom03710	ptr_retrom03710	14	49501254	49501474	-	ENSPTRP00000020652	ENSPTRG00000012029	2A	0.865	0.2168
ptr_retrop03685	ptr_retrop03685	14	50372990	50373645	+	ENSPTRP00000036650	ENSPTRG00000021436	9	0.826	0.1214
ptriretrop12923	ptriretrop12923	14	51058994	51059337	+	ENSMODP00000011471	ENSMODG00000009190	1	0.852	NA
ptriretrop12940	ptriretrop12940	14	51226657	51227930	+	ENSMMUP00000003160	ENSMMUG00000002362	15	0.774	NA
ptriretrop12957	ptriretrop12957	14	52565911	52566464	+	ENSP00000426466	ENSG00000145425	4	0.618	NA
ptr_retrom03722	ptr_retrom03722	14	52937849	52938741	-	ENSPTRP00000044643	ENSPTRG00000002277	10	0.886	0.1067
ptriretrom12515	ptriretrom12515	14	53842247	53843003	-	ENSP00000391755	ENSG00000160752	1	0.718	NA
ptr_retrom03724	ptr_retrom03724	14	53968653	53969467	-	ENSPTRP00000025475	ENSPTRG00000022841	3	0.808	0.1752
ptr_retrop03702	ENSPTRT00000010585	14	54201817	54202278	+	ENSPTRP00000006324	ENSPTRG00000003661	GL391837.1	0.546	70.13
ptriretrom12526	ptriretrom12526	14	54215502	54215819	-	ENSMUSP00000000090	ENSMUSG00000000088	9	0.924	NA
ptr_retrom03726	ptr_retrom03726	14	54256320	54256663	-	ENSPTRP00000039611	ENSPTRG00000016353	4	0.692	0.2071
ptr_retrop03704	ptr_retrop03704	14	54272680	54273207	+	ENSPTRP00000022993	ENSPTRG00000013408	20	0.89	0.0797
ptriretrop12997	ptriretrop12997	14	54521210	54521929	+	ENSMUSP00000099962	ENSMUSG00000062647	2	0.813	NA
ptr_retrop03708	ptr_retrop03708	14	54742216	54742825	+	ENSPTRP00000019396	ENSPTRG00000011298	19	0.887	0.1504
ptriretrom12545	ptriretrom12545	14	55654913	55655230	-	ENSPPYP00000023470	ENSPPYG00000025837	X	0.84	NA
ptr_retrop03709	ptr_retrop03709	14	55961342	55962524	+	ENSPTRP00000013016	ENSPTRG00000007617	16	0.686	3.1459
ptr_retrop03713	ptr_retrop03713	14	57118177	57118694	+	ENSPTRP00000045468	ENSPTRG00000015813	4	0.732	0.8883
ptr_retrop03714	ptr_retrop03714	14	57158077	57158457	+	ENSPTRP00000060271	ENSPTRG00000039223	19	0.852	0.1571
ptr_retrop03717	ptr_retrop03717	14	57301799	57302331	+	ENSPTRP00000038541	ENSPTRG00000022371	X	0.641	7.4216
ptr_retrop03719	ptr_retrop03719	14	57481866	57482093	+	ENSPTRP00000014338	ENSPTRG00000008401	16	0.868	0.11
ptriretrop13065	ptriretrop13065	14	57582389	57582902	+	ENSGALP00000000205	ENSGALG00000000150	4	0.746	NA
ptriretrop13081	ptriretrop13081	14	57818852	57819178	+	ENSGALP00000027030	ENSGALG00000016775	1	0.954	NA
ptr_retrom03730	ptr_retrom03730	14	57852372	57853045	-	ENSPTRP00000015346	ENSPTRG00000008993	17	0.92	0.0885
ptr_retrom03731	ptr_retrom03731	14	58174610	58175543	-	ENSPTRP00000033770	ENSPTRG00000019716	7	0.747	0.368
ptriretrop13090	ptriretrop13090	14	58220238	58220592	+	ENSMMUP00000021879	ENSMMUG00000016638	3	0.75	NA
ptr_retrop03723	ptr_retrop03723	14	59194535	59194846	+	ENSPTRP00000028257	ENSPTRG00000016460	4	0.788	0.2266
ptr_retrop03724	ptr_retrop03724	14	59214877	59215430	+	ENSPTRP00000010840	ENSPTRG00000006390	14	0.763	0.2253
ptriretrop13112	ptriretrop13112	14	59230785	59232029	+	ENSP00000219837	ENSG00000103550	16	0.976	NA
ptr_retrom03732	ptr_retrom03732	14	59250301	59250752	-	ENSPTRP00000017019	ENSPTRG00000010012	18	0.783	0.1641
ptr_retrom03735	ptr_retrom03735	14	59608962	59609222	-	ENSPTRP00000059851	ENSPTRG00000016822	5	0.767	0.1162
ptr_retrom03737	ptr_retrom03737	14	59643503	59643859	-	ENSPTRP00000013350	ENSPTRG00000007823	16	0.842	0.2362
ptr_retrop03729	ptr_retrop03729	14	59825750	59826361	+	ENSPTRP00000028167	ENSPTRG00000016401	4	0.98	0.0383
ptr_retrom03742	ptr_retrom03742	14	59963966	59964821	-	ENSPTRP00000000273	ENSPTRG00000000138	1	0.666	0.7633
ptriretrop13145	ENSPTRT00000062089	14	60307779	60308345	+	ENSP00000447260	ENSG00000135486	12	1	NA
ptr_retrom03743	ptr_retrom03743	14	60322822	60323819	-	ENSPTRP00000031372	ENSPTRG00000018355	6	0.539	77.8098
ptr_retrom03744	ptr_retrom03744	14	60886106	60886611	-	ENSPTRP00000014386	ENSPTRG00000008434	16	0.751	0.1955
ptr_retrom03745	ptr_retrom03745	14	61585972	61586350	-	ENSPTRP00000031296	ENSPTRG00000018314	GL390389.1	0.621	0.3324
ptriretrop13174	ptriretrop13174	14	62634785	62635126	+	ENSGGOP00000026272	ENSGGOG00000006432	2a	0.744	NA
ptr_retrom03746	ptr_retrom03746	14	62659379	62660556	-	ENSPTRP00000049680	ENSPTRG00000014348	22	0.872	0.1737
ptriretrop13183	ptriretrop13183	14	62666918	62667130	+	ENSMODP00000015398	ENSMODG00000012295	4	0.915	NA
ptr_retrop03735	ptr_retrop03735	14	62884720	62884884	+	ENSPTRP00000061334	ENSPTRG00000040141	19	0.618	0.4133
ptr_retrop03743	ENSPTRT00000011790	14	63623542	63625457	+	ENSPTRP00000007540	ENSPTRG00000004404	11	0.863	13.6976
ptriretrop13224	ptriretrop13224	14	64359398	64359685	+	ENSP00000386655	ENSG00000257529	X	0.763	NA
ptriretrop13232	ptriretrop13232	14	64369822	64370875	+	ENSMUSP00000059481	ENSMUSG00000006498	10	0.854	NA
ptriretrom12698	ptriretrom12698	14	64625581	64625811	-	ENSOANP00000025561	ENSOANG00000013689	Contig28790	0.779	NA
ptriretrom12701	ptriretrom12701	14	64978411	64979616	-	ENSP00000411018	ENSG00000138293	10	0.773	NA
ptriretrom12708	ptriretrom12708	14	64999717	65000178	-	ENSP00000273550	ENSG00000167996	11	0.792	NA
ptriretrom12716	ptriretrom12716	14	65112961	65113674	-	ENSP00000361626	ENSG00000065978	1	0.975	NA
ptr_retrop03746	ptr_retrop03746	14	65892042	65892522	+	ENSPTRP00000012123	ENSPTRG00000007094	15	0.883	0.1372
ptriretrop13256	ptriretrop13256	14	66757571	66758098	+	ENSGGOP00000028322	ENSGGOG00000026764	13	0.836	NA
ptriretrop13258	ptriretrop13258	14	66946806	66947360	+	ENSGGOP00000028459	ENSGGOG00000015046	10	0.919	NA
ptriretrom12740	ptriretrom12740	14	67494490	67495284	-	ENSMMUP00000029411	ENSMMUG00000022341	15	0.862	NA
ptr_retrom03757	ptr_retrom03757	14	67577131	67577636	-	ENSPTRP00000042839	ENSPTRG00000023064	7	0.922	0.074
ptriretrop13268	ptriretrop13268	14	67855142	67855587	+	ENSMMUP00000000568	ENSMMUG00000000422	15	0.731	NA
ptr_retrom03762	ptr_retrom03762	14	68054183	68054482	-	ENSPTRP00000053956	ENSPTRG00000031426	21	0.91	0.0617
ptr_retrop03749	ptr_retrop03749	14	68256306	68258297	+	ENSPTRP00000021219	ENSPTRG00000012391	2B	0.897	0.1102
ptr_retrop03752	ptr_retrop03752	14	69799961	69800958	+	ENSPTRP00000008508	ENSPTRG00000004996	12	0.818	0.1957
ptr_retrom03768	ptr_retrom03768	14	70538970	70539389	-	ENSPTRP00000037800	ENSPTRG00000021995	X	0.936	0.0546
ptriretrom12807	ptriretrom12807	14	72177350	72177631	-	ENSGGOP00000014989	ENSGGOG00000015365	19	0.904	NA
ptr_retrom03770	ptr_retrom03770	14	72212500	72212834	-	ENSPTRP00000031780	ENSPTRG00000018618	6	0.716	0.2752
ptr_retrop03753	ENSPTRT00000007127	14	72573468	72573830	+	ENSPTRP00000060135	ENSPTRG00000041138	11	1	0
ptr_retrom03771	ptr_retrom03771	14	72811939	72812495	-	ENSPTRP00000016369	ENSPTRG00000009632	17	0.58	0.5067
ptr_retrop03757	ptr_retrop03757	14	72874958	72875502	+	ENSPTRP00000005010	ENSPTRG00000002851	10	0.734	0.2258
ptriretrop13346	ptriretrop13346	14	73451526	73451762	+	ENSMMUP00000008895	ENSMMUG00000006760	3	0.831	NA
ptr_retrop03763	ptr_retrop03763	14	73743553	73744039	+	ENSPTRP00000039442	ENSPTRG00000001102	1	0.892	0.2076
ptr_retrop03764	ptr_retrop03764	14	74137027	74137591	+	ENSPTRP00000021561	ENSPTRG00000012621	2B	0.837	0.1747
ptr_retrom03778	ptr_retrom03778	14	74866184	74866579	-	ENSPTRP00000042761	ENSPTRG00000002666	10	0.879	0.0381
ptr_retrom03780	ptr_retrom03780	14	75923202	75924052	-	ENSPTRP00000025475	ENSPTRG00000022841	3	0.947	0.0419
ptr_retrom03781	ptr_retrom03781	14	76173913	76174209	-	ENSPTRP00000026873	ENSPTRG00000015620	3	0.697	8.5652
ptr_retrom03785	ptr_retrom03785	14	76982591	76982956	-	ENSPTRP00000009758	ENSPTRG00000005728	13	0.823	0.1603
ptriretrom12929	ptriretrom12929	14	77364338	77364676	-	ENSOANP00000020947	ENSOANG00000013265	X5	0.788	NA
ptriretrop13417	ptriretrop13417	14	80171013	80171378	+	ENSGGOP00000000955	ENSGGOG00000000971	1	0.922	NA
ptr_retrom03787	ptr_retrom03787	14	80350557	80351040	-	ENSPTRP00000017019	ENSPTRG00000010012	18	0.773	0.2605
ptriretrop13426	ptriretrop13426	14	80381414	80382182	+	ENSP00000366410	ENSG00000173614	1	0.828	NA
ptriretrop13431	ENSPTRT00000059391	14	80608315	80608635	+	ENSGGOP00000008597	ENSGGOG00000008793	12	0.852	NA
ptr_retrom03791	ptr_retrom03791	14	80696661	80697025	-	ENSPTRP00000042761	ENSPTRG00000002666	10	0.861	0.0773
ptriretrom12978	ptriretrom12978	14	80777224	80777553	-	ENSGGOP00000008597	ENSGGOG00000008793	12	0.89	NA
ptr_retrop03777	ptr_retrop03777	14	81027164	81028429	+	ENSPTRP00000045593	ENSPTRG00000018347	6	0.752	0.2115
ptr_retrop03778	ptr_retrop03778	14	81284395	81285359	+	ENSPTRP00000059279	ENSPTRG00000014352	22	0.852	0.1747
ptr_retrom03793	ptr_retrom03793	14	81461085	81462230	-	ENSPTRP00000045593	ENSPTRG00000018347	6	0.987	0.0092
ptriretrom12995	ptriretrom12995	14	82082377	82082731	-	ENSP00000271690	ENSG00000143420	1	0.983	NA
ptr_retrop03780	ptr_retrop03780	14	87414781	87415509	+	ENSPTRP00000004241	ENSPTRG00000002712	10	0.902	0.0449
ptriretrom13022	ptriretrom13022	14	89234263	89234751	-	ENSP00000436945	ENSG00000110172	11	0.912	NA
ptr_retrom03797	ptr_retrom03797	14	89885540	89886019	-	ENSPTRP00000009758	ENSPTRG00000005728	13	0.95	0.0062
ptr_retrop03788	ptr_retrop03788	14	90291678	90292070	+	ENSPTRP00000030810	ENSPTRG00000018039	6	0.878	0.0252
ptriretrop13521	ptriretrop13521	14	90955761	90956054	+	ENSP00000418348	ENSG00000187118	3	0.857	NA
ptriretrom13046	ptriretrom13046	14	91138128	91138575	-	ENSGGOP00000000262	ENSGGOG00000000266	5	0.933	NA
ptr_retrom03801	ptr_retrom03801	14	91139565	91140479	-	ENSPTRP00000007892	ENSPTRG00000029807	12	0.902	0.0679
ptriretrop13530	ptriretrop13530	14	92719206	92719572	+	ENSPPYP00000010369	ENSPPYG00000009240	18	0.878	NA
ptr_retrom03803	ptr_retrom03803	14	92806838	92807373	-	ENSPTRP00000018237	ENSPTRG00000010686	19	0.872	0.3688
ptriretrop13541	ptriretrop13541	14	92826076	92826357	+	ENSP00000446503	ENSG00000241343	X	0.719	NA
ptr_retrop03795	ptr_retrop03795	14	94314707	94315591	+	ENSPTRP00000025475	ENSPTRG00000022841	3	0.963	0.0797
ptr_retrom03804	ptr_retrom03804	14	94388395	94389004	-	ENSPTRP00000025346	ENSPTRG00000014695	3	0.887	0.0511
ptr_retrom03805	ptr_retrom03805	14	96047178	96047691	-	ENSPTRP00000060210	ENSPTRG00000005512	12	0.825	0.2603
ptriretrom13106	ptriretrom13106	14	96080053	96080441	-	ENSP00000389103	ENSG00000198242	17	0.646	NA
ptr_retrop03805	ptr_retrop03805	14	99638781	99639627	+	ENSPTRP00000053176	ENSPTRG00000020205	8	0.905	0.1285
ptriretrom13124	ptriretrom13124	14	99649063	99649716	-	ENSP00000433034	ENSG00000140988	16	0.669	NA
ptr_retrom03811	ptr_retrom03811	14	100918800	100919524	-	ENSPTRP00000013850	ENSPTRG00000008116	16	0.516	0.4785
ptr_retrop03808	ENSPTRT00000032416	14	101378431	101378865	+	ENSPTRP00000014891	ENSPTRG00000008742	17	0.972	0.0217
ptr_retrom03812	ptr_retrom03812	14	101668914	101669159	-	ENSPTRP00000032349	ENSPTRG00000018934	7	0.734	0.1977
ptriretrom13184	ptriretrom13184	14	102363671	102364137	-	ENSMUSP00000099541	ENSMUSG00000058546	11	0.853	NA
ptr_retrop03810	ptr_retrop03810	14	102749146	102749716	+	ENSPTRP00000014462	ENSPTRG00000008480	16	0.791	0.3545
ptr_retrop03811	ptr_retrop03811	14	102849169	102849552	+	ENSPTRP00000026324	ENSPTRG00000015270	3	0.578	0.3878
ptr_retrop03813	ptr_retrop03813	14	102857846	102858216	+	ENSPTRP00000009758	ENSPTRG00000005728	13	0.847	0.0869
ptriretrop13692	ptriretrop13692	14	102894021	102894298	+	ENSMMUP00000017189	ENSMMUG00000013088	20	0.817	NA
ptr_retrop03816	ptr_retrop03816	14	102951030	102951502	+	ENSPTRP00000009758	ENSPTRG00000005728	13	0.831	0.1042
ptr_retrop03817	ptr_retrop03817	14	102992813	102993292	+	ENSPTRP00000017019	ENSPTRG00000010012	18	0.79	0.2324
ptr_retrom03819	ptr_retrom03819	14	103089875	103090746	-	ENSPTRP00000025475	ENSPTRG00000022841	3	0.89	0.1057
ptr_retrom03820	ptr_retrom03820	14	103128658	103129297	-	ENSPTRP00000030891	ENSPTRG00000018085	6	0.825	0.1744
ptriretrom13243	ptriretrom13243	14	105463193	105463513	-	ENSP00000363162	ENSG00000136888	9	0.686	NA
ptr_retrom03826	ptr_retrom03826	14	105674320	105674949	-	ENSPTRP00000001146	ENSPTRG00000000659	1	0.89	0.0733
ptr_retrom03885	ptr_retrom03885	14	106086973	106087440	-	ENSPTRP00000060000	ENSPTRG00000041000	GL392151.1	0.635	0.3609
ptr_retrop03155	ptr_retrop03155	15	20407683	20408733	+	ENSPTRP00000023770	ENSPTRG00000013795	21	0.934	0.0508
ptr_retrop03157	ENSPTRT00000012595	15	21115965	21117407	+	ENSPTRP00000033861	ENSPTRG00000019766	7	0.518	1.0314
ptr_retrom03343	ptr_retrom03343	15	22348742	22349635	-	ENSPTRP00000001659	ENSPTRG00000000963	1	0.913	0.0591
ptr_retrom03347	ptr_retrom03347	15	23397810	23398237	-	ENSPTRP00000027890	ENSPTRG00000016233	4	0.826	0.0888
ptr_retrop03162	ptr_retrop03162	15	24521824	24522421	+	ENSPTRP00000052925	ENSPTRG00000007790	17	0.784	0.3473
ptr_retrop03163	ptr_retrop03163	15	25556768	25557641	+	ENSPTRP00000001659	ENSPTRG00000000963	1	0.828	0.1927
ptriretrom10832	ENSPTRT00000066249	15	26260495	26261072	-	ENSP00000225777	ENSG00000108639	17	0.912	NA
ptriretrop10943	ptriretrop10943	15	27449980	27450191	+	ENSP00000219400	ENSG00000103121	16	0.7	NA
ptr_retrom03358	ptr_retrom03358	15	28565038	28567492	-	ENSPTRP00000001460	ENSPTRG00000000847	1	0.92	0.0271
ptriretrom10856	ptriretrom10856	15	29122205	29124214	-	ENSP00000251287	ENSG00000099822	19	0.926	NA
ptr_retrom03366	ptr_retrom03366	15	29606955	29607301	-	ENSPTRP00000014400	ENSPTRG00000008445	16	0.672	0.2375
ptriretrop10966	ptriretrop10966	15	29787039	29787415	+	ENSOANP00000021620	ENSOANG00000013708	Contig30988	0.835	NA
ptriretrom10882	ptriretrom10882	15	30882987	30883390	-	ENSP00000388674	ENSG00000144713	3	0.756	NA
ptr_retrom03376	ptr_retrom03376	15	31179355	31180373	-	ENSPTRP00000039339	ENSPTRG00000018890	7	0.765	0.5564
ptr_retrom03379	ptr_retrom03379	15	31324127	31325618	-	ENSPTRP00000018758	ENSPTRG00000010941	19	0.926	0.0527
ptr_retrop03172	ptr_retrop03172	15	31329561	31331036	+	ENSPTRP00000032261	ENSPTRG00000018892	7	0.933	0.1873
ptriretrom10918	ptriretrom10918	15	31668073	31669329	-	ENSMODP00000029535	ENSMODG00000023336	3	0.661	NA
ptriretrop11004	ptriretrop11004	15	31763695	31764009	+	ENSPPYP00000023470	ENSPPYG00000025837	X	0.953	NA
ptr_retrop03176	ptr_retrop03176	15	31910975	31911541	+	ENSPTRP00000006938	ENSPTRG00000013952	21	0.838	0.1855
ptriretrom10931	ptriretrom10931	15	31940584	31941220	-	ENSMUSP00000021942	ENSMUSG00000021486	13	0.901	NA
ptriretrop11017	ptriretrop11017	15	32059991	32060311	+	ENSMUSP00000115293	ENSMUSG00000032249	9	0.785	NA
ptriretrop11025	ptriretrop11025	15	32104093	32104464	+	ENSP00000219169	ENSG00000102898	16	0.888	NA
ptriretrop11030	ptriretrop11030	15	32235336	32235679	+	ENSOANP00000021620	ENSOANG00000013708	Contig30988	0.853	NA
ptriretrop11045	ptriretrop11045	15	33452330	33452965	+	ENSMODP00000021533	ENSMODG00000017253	2	0.913	NA
ptr_retrop03180	ptr_retrop03180	15	33456451	33458623	+	ENSPTRP00000058410	ENSPTRG00000004935	12	0.884	0.1055
ptr_retrom03387	ptr_retrom03387	15	33466060	33467049	-	ENSPTRP00000024444	ENSPTRG00000014197	22	0.69	0.6121
ptr_retrom03388	ptr_retrom03388	15	33656652	33657533	-	ENSPTRP00000040515	ENSPTRG00000014365	22	0.654	74.0124
ptr_retrop03182	ptr_retrop03182	15	34335779	34336182	+	ENSPTRP00000017340	ENSPTRG00000010200	19	0.846	0.6526
ptriretrom10975	ptriretrom10975	15	37194176	37194988	-	ENSPPYP00000005724	ENSPPYG00000005022	12	0.864	NA
ptriretrom10988	ptriretrom10988	15	37374926	37375488	-	ENSP00000400467	ENSG00000163682	4	0.87	NA
ptr_retrom03398	ptr_retrom03398	15	37426440	37426782	-	ENSPTRP00000040236	ENSPTRG00000022791	12	0.752	0.3706
ptriretrop11093	ptriretrop11093	15	37657996	37658253	+	ENSGALP00000012928	ENSGALG00000007971	18	0.761	NA
ptriretrom10999	ENSPTRT00000012785	15	37776328	37776789	-	ENSMUSP00000132588	ENSMUSG00000006699	4	0.556	NA
ptr_retrom03401	ptr_retrom03401	15	37852551	37853053	-	ENSPTRP00000036025	ENSPTRG00000021075	9	0.762	0.1433
ptr_retrop03194	ptr_retrop03194	15	39567777	39568279	+	ENSPTRP00000016741	ENSPTRG00000009836	18	0.901	0.0823
ptr_retrom03405	ptr_retrom03405	15	39803408	39804884	-	ENSPTRP00000008490	ENSPTRG00000020404	12	0.544	2.7681
ptr_retrom03406	ptr_retrom03406	15	39944617	39945683	-	ENSPTRP00000002407	ENSPTRG00000001422	1	0.809	0.136
ptr_retrop03197	ptr_retrop03197	15	40139198	40139758	+	ENSPTRP00000007005	ENSPTRG00000004073	11	0.925	0.068
ptr_retrom03408	ptr_retrom03408	15	40148996	40150099	-	ENSPTRP00000002407	ENSPTRG00000001422	1	0.818	0.1079
ptr_retrom03410	ptr_retrom03410	15	40280923	40281404	-	ENSPTRP00000016363	ENSPTRG00000009628	17	0.845	0.1075
ptriretrom11099	ptriretrom11099	15	40989047	40989373	-	ENSOANP00000023178	ENSOANG00000014709	Ultra369	0.864	NA
ptr_retrom03418	ptr_retrom03418	15	41108754	41109873	-	ENSPTRP00000039339	ENSPTRG00000018890	7	0.832	0.3545
ptr_retrop03199	ptr_retrop03199	15	41183569	41184371	+	ENSPTRP00000007822	ENSPTRG00000004577	12	0.787	0.3519
ptr_retrop03200	ptr_retrop03200	15	41474800	41475790	+	ENSPTRP00000007822	ENSPTRG00000004577	12	0.733	0.5285
ptr_retrom03419	ptr_retrom03419	15	42117881	42119010	-	ENSPTRP00000025369	ENSPTRG00000014707	3	0.724	0.2254
ptr_retrop03207	ptr_retrop03207	15	42200456	42201168	+	ENSPTRP00000052121	ENSPTRG00000013529	20	0.777	42.0789
ptriretrop11214	ptriretrop11214	15	42363591	42363939	+	ENSMMUP00000028664	ENSMMUG00000021766	16	0.882	NA
ptriretrop11217	ptriretrop11217	15	42705140	42705646	+	ENSGGOP00000000955	ENSGGOG00000000971	1	0.867	NA
ptr_retrop03210	ptr_retrop03210	15	44002545	44002990	+	ENSPTRP00000014140	ENSPTRG00000008282	16	0.707	0.277
ptriretrom11128	ptriretrom11128	15	44906933	44907637	-	ENSP00000361076	ENSG00000148303	9	0.966	NA
ptriretrop11244	NA	15	45909447	45909914	+	ENSMMUP00000002787	ENSMMUG00000002089	10	0.533	NA
ptr_retrop03223	ptr_retrop03223	15	46157598	46158735	+	ENSPTRP00000008490	ENSPTRG00000020404	12	0.593	108.096
ptriretrop11259	ptriretrop11259	15	46342527	46343009	+	ENSP00000358272	ENSG00000123545	6	0.857	NA
ptr_retrom03421	ptr_retrom03421	15	46565129	46566689	-	ENSPTRP00000012087	ENSPTRG00000007070	15	0.904	0.0563
ptr_retrop03225	ptr_retrop03225	15	47634215	47635523	+	ENSPTRP00000023000	ENSPTRG00000013414	20	0.805	0.4385
ptr_retrop03226	ptr_retrop03226	15	47685043	47685379	+	ENSPTRP00000034700	ENSPTRG00000020264	8	0.821	0.2141
ptr_retrop03227	ptr_retrop03227	15	48170773	48172165	+	ENSPTRP00000035044	ENSPTRG00000020493	8	0.871	0.0912
ptriretrom11159	ptriretrom11159	15	49086458	49087717	-	ENSMMUP00000035026	ENSMMUG00000020403	16	0.838	NA
ptriretrop11300	ptriretrop11300	15	49325832	49326284	+	ENSGALP00000009821	ENSGALG00000006096	5	0.901	NA
ptriretrop11310	ptriretrop11310	15	49748818	49749462	+	ENSP00000376055	ENSG00000114942	2	0.898	NA
ptr_retrop03230	ptr_retrop03230	15	50136798	50137682	+	ENSPTRP00000025475	ENSPTRG00000022841	3	0.908	0.1092
ptr_retrom03430	ptr_retrom03430	15	50187938	50189224	-	ENSPTRP00000045593	ENSPTRG00000018347	6	0.873	0.0834
ptriretrom11194	ptriretrom11194	15	51097267	51097476	-	ENSGALP00000012928	ENSGALG00000007971	18	0.571	NA
ptr_retrom03432	ptr_retrom03432	15	51313494	51315246	-	ENSPTRP00000026810	ENSPTRG00000015578	3	0.792	0.1523
ptriretrom11203	ptriretrom11203	15	51588348	51588879	-	ENSP00000447782	ENSG00000135486	12	0.775	NA
ptr_retrom03433	ptr_retrom03433	15	52748210	52748932	-	ENSPTRP00000002219	ENSPTRG00000001301	1	0.905	0.0693
ptr_retrop03232	ptr_retrop03232	15	53060498	53060974	+	ENSPTRP00000009758	ENSPTRG00000005728	13	0.981	0.0001
ptr_retrom03436	ptr_retrom03436	15	53317871	53319345	-	ENSPTRP00000027832	ENSPTRG00000016198	4	0.921	0.0543
ptriretrom11248	ptriretrom11248	15	53504361	53505211	-	ENSGGOP00000022638	ENSGGOG00000004423	4	0.746	NA
ptr_retrop03233	ptr_retrop03233	15	54167961	54168239	+	ENSPTRP00000061270	ENSPTRG00000041316	10	0.761	0.2018
ptriretrom11254	ptriretrom11254	15	54571838	54572436	-	ENSMMUP00000002475	ENSMMUG00000001858	12	0.851	NA
ptr_retrop03235	ptr_retrop03235	15	54817692	54818103	+	ENSPTRP00000034976	ENSPTRG00000020457	8	0.752	0.265
ptriretrom11264	ptriretrom11264	15	54885060	54885488	-	ENSGALP00000009821	ENSGALG00000006096	5	0.856	NA
ptr_retrom03439	ptr_retrom03439	15	55322054	55322846	-	ENSPTRP00000001688	ENSPTRG00000000979	1	0.583	3.0407
ptriretrop11365	ptriretrop11365	15	55539812	55540156	+	ENSMUSP00000032597	ENSMUSG00000030432	7	0.698	NA
ptr_retrop03236	ptr_retrop03236	15	56016079	56016568	+	ENSPTRP00000028484	ENSPTRG00000016597	4	0.667	2.8809
ptriretrom11277	ptriretrom11277	15	56036286	56036891	-	ENSOANP00000010174	ENSOANG00000006370	Contig24387	0.833	NA
ptr_retrop03241	ptr_retrop03241	15	56216398	56216873	+	ENSPTRP00000009758	ENSPTRG00000005728	13	0.875	0.0488
ptr_retrop03246	ENSPTRT00000013149	15	56556552	56557694	+	ENSPTRP00000005960	ENSPTRG00000003423	11	0.825	0.319
ptr_retrom03443	ptr_retrom03443	15	56751987	56752767	-	ENSPTRP00000029097	ENSPTRG00000016990	5	0.893	0.1019
ptriretrom11298	ptriretrom11298	15	56758409	56758821	-	ENSP00000416638	ENSG00000148303	9	0.79	NA
ptr_retrom03445	ptr_retrom03445	15	56878072	56878534	-	ENSPTRP00000009758	ENSPTRG00000005728	13	0.706	0.1893
ptr_retrom03447	ptr_retrom03447	15	56906812	56907290	-	ENSPTRP00000009758	ENSPTRG00000005728	13	0.906	0.0578
ptr_retrop03250	ptr_retrop03250	15	57031270	57031830	+	ENSPTRP00000010965	ENSPTRG00000006466	14	0.957	0.0605
ptr_retrom03448	ptr_retrom03448	15	57235056	57236958	-	ENSPTRP00000021219	ENSPTRG00000012391	2B	0.858	0.1373
ptriretrom11325	ptriretrom11325	15	57422782	57423639	-	ENSP00000396504	ENSG00000106484	7	0.82	NA
ptriretrop11437	ptriretrop11437	15	57766250	57766558	+	ENSPPYP00000023470	ENSPPYG00000025837	X	0.726	NA
ptr_retrop03258	ptr_retrop03258	15	59063282	59063639	+	ENSPTRP00000004338	ENSPTRG00000002518	10	0.533	11.6708
ptriretrom11336	NA	15	59473833	59474699	-	ENSGGOP00000007063	ENSGGOG00000007220	5	0.759	NA
ptr_retrom03451	ptr_retrom03451	15	59748507	59748773	-	ENSPTRP00000053956	ENSPTRG00000031426	21	0.921	0.196
ptr_retrom03453	ptr_retrom03453	15	61940368	61941328	-	ENSPTRP00000007822	ENSPTRG00000004577	12	0.87	0.1967
ptr_retrom03455	ptr_retrom03455	15	62044326	62044729	-	ENSPTRP00000009758	ENSPTRG00000005728	13	0.847	0.0964
ptr_retrop03261	ptr_retrop03261	15	62452667	62453254	+	ENSPTRP00000007105	ENSPTRG00000004134	11	0.726	0.1088
ptr_retrom03456	ptr_retrom03456	15	63223297	63224262	-	ENSPTRP00000028018	ENSPTRG00000016311	4	0.946	0.0363
ptriretrom11394	ptriretrom11394	15	63850692	63851268	-	ENSMODP00000025713	ENSMODG00000020553	5	0.901	NA
ptr_retrop03262	ptr_retrop03262	15	64715051	64715395	+	ENSPTRP00000042761	ENSPTRG00000002666	10	0.821	0.1408
ptr_retrop03265	ptr_retrop03265	15	66348246	66349186	+	ENSPTRP00000058559	ENSPTRG00000008155	16	0.851	0.0947
ptr_retrop03267	ptr_retrop03267	15	66543517	66545414	+	ENSPTRP00000027946	ENSPTRG00000016270	4	0.708	0.2439
ptriretrom11442	ptriretrom11442	15	68339723	68340217	-	ENSPPYP00000015463	ENSPPYG00000013818	3	0.86	NA
ptr_retrop03272	ptr_retrop03272	15	68401985	68403103	+	ENSPTRP00000008490	ENSPTRG00000020404	12	0.612	101.704
ptr_retrom03464	ptr_retrom03464	15	68612705	68613453	-	ENSPTRP00000001659	ENSPTRG00000000963	1	0.888	0.086
ptr_retrom03465	ptr_retrom03465	15	68896314	68896865	-	ENSPTRP00000017019	ENSPTRG00000010012	18	0.984	0.0189
ptr_retrom03467	ptr_retrom03467	15	69605410	69605889	-	ENSPTRP00000026874	ENSPTRG00000015621	3	0.801	0.0682
ptriretrop11562	ENSPTRT00000075622	15	69627290	69627955	+	ENSPPYP00000005017	ENSPPYG00000004396	12	0.959	NA
ptr_retrop03274	ptr_retrop03274	15	69705314	69705725	+	ENSPTRP00000009758	ENSPTRG00000005728	13	0.842	0.0957
ptr_retrom03469	ptr_retrom03469	15	69952008	69952502	-	ENSPTRP00000038960	ENSPTRG00000022808	9	0.958	0.0921
ptr_retrop03276	ptr_retrop03276	15	70024369	70025105	+	ENSPTRP00000015927	ENSPTRG00000009376	17	0.769	0.1843
ptr_retrom03473	ptr_retrom03473	15	70686708	70686956	-	ENSPTRP00000022531	ENSPTRG00000013163	20	0.613	0.3241
ptriretrom11532	ptriretrom11532	15	72763492	72763806	-	ENSPPYP00000023470	ENSPPYG00000025837	X	0.906	NA
ptriretrom11550	ptriretrom11550	15	72874687	72875171	-	ENSOANP00000017078	ENSOANG00000010774	Ultra312	0.794	NA
ptriretrom11560	ptriretrom11560	15	73059175	73059415	-	ENSGALP00000018594	ENSGALG00000011409	1	0.696	NA
ptr_retrop03281	ptr_retrop03281	15	73299786	73300271	+	ENSPTRP00000042839	ENSPTRG00000023064	7	0.915	0.1149
ptriretrom11594	NA	15	74252624	74253888	-	ENSMODP00000030006	ENSMODG00000018533	2	0.969	NA
ptriretrom11605	ptriretrom11605	15	74558294	74559520	-	ENSP00000449404	ENSG00000170421	12	0.824	NA
ptriretrop11651	ptriretrop11651	15	74859625	74859990	+	ENSGGOP00000000955	ENSGGOG00000000971	1	0.867	NA
ptr_retrop03283	ptr_retrop03283	15	75977033	75977572	+	ENSPTRP00000031647	ENSPTRG00000018534	6	0.802	0.2071
ptriretrom11637	ptriretrom11637	15	76256854	76257072	-	ENSOANP00000027436	ENSOANG00000021547	Ultra723	0.795	NA
ptr_retrom03498	ptr_retrom03498	15	76500404	76500883	-	ENSPTRP00000009758	ENSPTRG00000005728	13	0.938	0.0792
ptr_retrop03287	ptr_retrop03287	15	76878587	76879462	+	ENSPTRP00000046641	ENSPTRG00000006118	14	0.856	0.1
ptriretrom11655	ptriretrom11655	15	77198643	77199286	-	ENSP00000386145	ENSG00000198176	13	0.926	NA
ptr_retrom03500	ptr_retrom03500	15	77305100	77305828	-	ENSPTRP00000031053	ENSPTRG00000018175	6	0.862	0.0545
ptr_retrom03501	ptr_retrom03501	15	77390250	77390606	-	ENSPTRP00000031780	ENSPTRG00000018618	6	0.761	0.2875
ptr_retrop03290	ptr_retrop03290	15	77583843	77584912	+	ENSPTRP00000002407	ENSPTRG00000001422	1	0.845	0.1148
ptriretrom11693	ptriretrom11693	15	78779136	78779582	-	ENSOANP00000021354	ENSOANG00000013539	Contig102	0.713	NA
ptriretrom11699	ptriretrom11699	15	79681419	79681763	-	ENSOANP00000023178	ENSOANG00000014709	Ultra369	0.835	NA
ptr_retrom03507	ptr_retrom03507	15	80294740	80295855	-	ENSPTRP00000039339	ENSPTRG00000018890	7	0.673	1.1755
ptr_retrop03297	ptr_retrop03297	15	80607064	80607464	+	ENSPTRP00000034854	ENSPTRG00000020373	8	0.919	0.0597
ptr_retrom03512	ptr_retrom03512	15	82237951	82238456	-	ENSPTRP00000028484	ENSPTRG00000016597	4	0.645	2.9434
ptriretrom11746	ptriretrom11746	15	82479555	82480305	-	ENSGGOP00000018120	ENSGGOG00000023498	2b	0.824	NA
ptr_retrop03301	ptr_retrop03301	15	82716014	82716418	+	ENSPTRP00000034854	ENSPTRG00000020373	8	0.896	0.0472
ptr_retrop03303	ptr_retrop03303	15	85883168	85883647	+	ENSPTRP00000009758	ENSPTRG00000005728	13	0.994	0
ptr_retrop03308	ptr_retrop03308	15	86304288	86305211	+	ENSPTRP00000008508	ENSPTRG00000004996	12	0.727	0.2335
ptr_retrom03516	ptr_retrom03516	15	86334255	86334974	-	ENSPTRP00000047674	ENSPTRG00000019615	7	0.892	0.0377
ptr_retrom03517	ptr_retrom03517	15	86382481	86382868	-	ENSPTRP00000015209	ENSPTRG00000008911	17	0.682	0.458
ptr_retrom03520	ptr_retrom03520	15	86545412	86546093	-	ENSPTRP00000016782	ENSPTRG00000009864	18	0.906	0.0913
ptriretrom11796	ptriretrom11796	15	87039568	87039851	-	ENSPPYP00000023470	ENSPPYG00000025837	X	0.853	NA
ptr_retrop03311	ptr_retrop03311	15	87555949	87556343	+	ENSPTRP00000031780	ENSPTRG00000018618	6	0.879	0.1013
ptr_retrom03524	ENSPTRT00000072487	15	87704297	87704647	-	ENSPTRP00000014784	ENSPTRG00000034115	17	0.845	4.3694
ptr_retrop03317	ptr_retrop03317	15	87743463	87743705	+	ENSPTRP00000048498	ENSPTRG00000028890	19	0.631	0.4428
ptriretrop11847	ptriretrop11847	15	88000415	88000627	+	ENSMODP00000015398	ENSMODG00000012295	4	0.901	NA
ptr_retrop03320	ptr_retrop03320	15	89661488	89662091	+	ENSPTRP00000048471	ENSPTRG00000028871	19	0.814	0.1706
ptriretrop11872	ptriretrop11872	15	89666127	89666998	+	ENSGGOP00000007063	ENSGGOG00000007220	5	0.892	NA
ptr_retrop03323	ENSPTRT00000036350	15	90096875	90097174	+	ENSPTRP00000053956	ENSPTRG00000031426	21	0.97	0.017
ptriretrop11889	ptriretrop11889	15	90104429	90104693	+	ENSP00000408172	ENSG00000071082	2	0.67	NA
ptr_retrom03545	ptr_retrom03545	15	90120875	90121234	-	ENSPTRP00000032725	ENSPTRG00000019153	7	0.908	0.0646
ptr_retrop03327	ptr_retrop03327	15	90182383	90183291	+	ENSPTRP00000045975	ENSPTRG00000021682	X	0.814	0.0501
ptriretrop11905	ptriretrop11905	15	91574831	91575235	+	ENSMMUP00000028664	ENSMMUG00000021766	16	0.719	NA
ptr_retrom03551	ptr_retrom03551	15	93892316	93893060	-	ENSPTRP00000004915	ENSPTRG00000002807	10	0.846	0.1982
ptriretrop11914	ptriretrop11914	15	93898880	93899205	+	ENSGALP00000027030	ENSGALG00000016775	1	0.775	NA
ptriretrop11925	ptriretrop11925	15	94213736	94215293	+	ENSMMUP00000014783	ENSMMUG00000011281	9	0.9	NA
ptriretrop11943	NA	15	96769222	96771454	+	ENSGGOP00000001900	ENSGGOG00000001928	12	0.884	NA
ptriretrom11874	ptriretrom11874	15	96796873	96797397	-	ENSP00000447782	ENSG00000135486	12	0.869	NA
ptriretrom11880	ptriretrom11880	15	97063421	97064146	-	ENSGGOP00000007854	ENSGGOG00000008034	8	0.787	NA
ptriretrom11894	ptriretrom11894	15	98177079	98178039	-	ENSOANP00000017578	ENSOANG00000011097	Ultra323	0.765	NA
ptriretrom09755	ptriretrom09755	16	2992583	2992917	-	ENSGALP00000006308	ENSGALG00000003966	19	0.79	NA
ptr_retrom03172	ptr_retrom03172	16	3357427	3358163	-	ENSPTRP00000031053	ENSPTRG00000018175	6	0.858	0.0437
ptr_retrop02965	ptr_retrop02965	16	3526315	3526881	+	ENSPTRP00000019289	ENSPTRG00000011245	19	0.841	0.2955
ptr_retrop02966	ptr_retrop02966	16	3871245	3871731	+	ENSPTRP00000007885	ENSPTRG00000004617	12	0.607	0.1473
ptriretrom09821	ptriretrom09821	16	4616212	4616520	-	ENSP00000422078	ENSG00000113387	5	0.903	NA
ptr_retrom03174	ptr_retrom03174	16	5326212	5326528	-	ENSPTRP00000042761	ENSPTRG00000002666	10	0.667	0.3766
ptriretrop10020	ptriretrop10020	16	5335809	5336491	+	ENSGALP00000016361	ENSGALG00000010077	4	0.81	NA
ptriretrop10030	ptriretrop10030	16	5432744	5433217	+	ENSGGOP00000007063	ENSGGOG00000007220	5	0.863	NA
ptr_retrop02971	ptr_retrop02971	16	10257690	10259192	+	ENSPTRP00000033661	ENSPTRG00000019660	7	0.849	0.2434
ptr_retrop02973	ptr_retrop02973	16	11194826	11195563	+	ENSPTRP00000031053	ENSPTRG00000018175	6	0.943	0.0181
ptr_retrop02975	ptr_retrop02975	16	11413323	11414088	+	ENSPTRP00000046641	ENSPTRG00000006118	14	0.862	0.0776
ptr_retrop02981	ptr_retrop02981	16	14430830	14431443	+	ENSPTRP00000052925	ENSPTRG00000007790	17	0.927	0.0514
ptriretrom09935	ptriretrom09935	16	16196966	16197435	-	ENSMODP00000004318	ENSMODG00000003534	3	0.777	NA
ptriretrop10106	ptriretrop10106	16	17855214	17855771	+	ENSP00000379729	ENSG00000147604	8	0.93	NA
ptr_retrom03187	ptr_retrom03187	16	20111568	20111843	-	ENSPTRP00000051301	ENSPTRG00000030224	1	0.88	0.056
ptr_retrop02986	ptr_retrop02986	16	23605305	23606063	+	ENSPTRP00000053583	ENSPTRG00000008072	16	0.826	0.065
ptr_retrom03188	ptr_retrom03188	16	24719244	24719435	-	ENSPTRP00000061270	ENSPTRG00000041316	10	0.734	0.29
ptriretrom10023	ptriretrom10023	16	27342593	27343380	-	ENSMODP00000030006	ENSMODG00000018533	2	0.825	NA
ptr_retrom03193	ptr_retrom03193	16	28459530	28460506	-	ENSPTRP00000007822	ENSPTRG00000004577	12	0.88	0.2625
ptr_retrom03195	ptr_retrom03195	16	28784619	28784862	-	ENSPTRP00000032349	ENSPTRG00000018934	7	0.988	0.0001
ptr_retrom03200	ptr_retrom03200	16	28966510	28966838	-	ENSPTRP00000013350	ENSPTRG00000007823	16	0.85	0.1263
ptriretrom10087	ENSPTRT00000014765	16	30579916	30581106	-	ENSOANP00000000596	ENSOANG00000000363	Ultra484	0.909	NA
ptr_retrom03218	ptr_retrom03218	16	30967081	30967523	-	ENSPTRP00000054941	ENSPTRG00000013204	20	0.753	0.3288
ptr_retrop02995	ptr_retrop02995	16	31341905	31342156	+	ENSPTRP00000048498	ENSPTRG00000028890	19	0.774	0.3603
ptriretrom10175	ptriretrom10175	16	31901561	31901826	-	ENSMMUP00000008895	ENSMMUG00000006760	3	0.615	NA
ptr_retrop03002	ptr_retrop03002	16	32012841	32013684	+	ENSPTRP00000053618	ENSPTRG00000007984	16	0.618	67.0049
ptriretrop10260	ptriretrop10260	16	32070505	32071367	+	ENSGGOP00000012633	ENSGGOG00000012947	5	0.681	NA
ptriretrom10187	ptriretrom10187	16	32077734	32077936	-	ENSGALP00000012928	ENSGALG00000007971	18	0.603	NA
ptr_retrom03232	ptr_retrom03232	16	32618750	32619965	-	ENSPTRP00000034079	ENSPTRG00000019897	7	0.73	0.2947
ptr_retrom03236	ptr_retrom03236	16	44294745	44295124	-	ENSPTRP00000008585	ENSPTRG00000005044	12	0.612	0.2181
ptr_retrop03046	ptr_retrop03046	16	44739388	44739750	+	ENSPTRP00000033999	ENSPTRG00000019854	7	0.689	0.292
ptr_retrop03048	ptr_retrop03048	16	44854163	44854546	+	ENSPTRP00000033999	ENSPTRG00000019854	7	0.705	0.3799
ptr_retrop03049	ptr_retrop03049	16	44922778	44923247	+	ENSPTRP00000033999	ENSPTRG00000019854	7	0.65	0.4692
ptr_retrop03050	ptr_retrop03050	16	45086428	45086893	+	ENSPTRP00000033999	ENSPTRG00000019854	7	0.625	0.4552
ptr_retrop03051	ptr_retrop03051	16	45120180	45120646	+	ENSPTRP00000033999	ENSPTRG00000019854	7	0.675	0.3613
ptr_retrop03053	ptr_retrop03053	16	45173751	45174299	+	ENSPTRP00000048453	ENSPTRG00000028859	19	0.938	0.0129
ptr_retrom03240	ptr_retrom03240	16	45259964	45260768	-	ENSPTRP00000014729	ENSPTRG00000008631	17	0.764	0.2596
ptr_retrop03056	ptr_retrop03056	16	45508851	45509451	+	ENSPTRP00000061136	ENSPTRG00000009861	18	0.738	0.1814
ptriretrom10253	ptriretrom10253	16	46092446	46092815	-	ENSP00000389103	ENSG00000198242	17	0.654	NA
ptriretrop10382	ptriretrop10382	16	46202765	46203425	+	ENSP00000355325	ENSG00000100804	14	0.738	NA
ptr_retrom03243	ptr_retrom03243	16	46546335	46546673	-	ENSPTRP00000047122	ENSPTRG00000019637	7	0.965	0.032
ptr_retrom03244	ptr_retrom03244	16	47302249	47302629	-	ENSPTRP00000060271	ENSPTRG00000039223	19	0.781	0.1806
ptriretrop10393	ptriretrop10393	16	47474771	47476631	+	ENSPPYP00000018544	ENSPPYG00000016580	6	0.876	NA
ptriretrom10288	ptriretrom10288	16	47556676	47557382	-	ENSGGOP00000021640	ENSGGOG00000009371	16	0.819	NA
ptr_retrop03059	ptr_retrop03059	16	47579362	47579828	+	ENSPTRP00000012123	ENSPTRG00000007094	15	0.871	0.1118
ptriretrop10403	ptriretrop10403	16	47696858	47697858	+	ENSP00000417303	ENSG00000102349	X	0.776	NA
ptriretrom10309	ptriretrom10309	16	49037372	49038107	-	ENSMUSP00000121577	ENSMUSG00000059430	6	0.746	NA
ptriretrop10420	ptriretrop10420	16	50098809	50099264	+	ENSMUSP00000023707	ENSMUSG00000022982	16	0.701	NA
ptr_retrop03061	ptr_retrop03061	16	50272766	50273636	+	ENSPTRP00000009190	ENSPTRG00000005419	12	0.668	0.5325
ptr_retrop03062	ptr_retrop03062	16	51663610	51664209	+	ENSPTRP00000002318	ENSPTRG00000001375	1	0.79	0.2163
ptriretrop10436	ptriretrop10436	16	51948395	51948920	+	ENSP00000407828	ENSG00000167085	17	0.908	NA
ptr_retrom03255	ptr_retrom03255	16	52025510	52026352	-	ENSPTRP00000006211	ENSPTRG00000003573	11	0.669	0.262
ptriretrop10446	ptriretrop10446	16	52316776	52317847	+	ENSP00000427528	ENSG00000071539	5	0.78	NA
ptr_retrop03064	ptr_retrop03064	16	54618960	54619586	+	ENSPTRP00000018650	ENSPTRG00000010887	19	0.713	9.2541
ptr_retrop03066	ptr_retrop03066	16	55985411	55985800	+	ENSPTRP00000042761	ENSPTRG00000002666	10	0.8	0.199
ptr_retrop03068	ptr_retrop03068	16	56686490	56687010	+	ENSPTRP00000038541	ENSPTRG00000022371	X	0.764	0.2471
ptr_retrom03259	ptr_retrom03259	16	57186844	57187747	-	ENSPTRP00000012301	ENSPTRG00000007192	15	0.833	0.1781
ptriretrom10368	ENSPTRT00000067173	16	57362936	57363811	-	ENSP00000428755	ENSG00000181163	5	1	NA
ptriretrom10382	NA	16	57756552	57756806	-	ENSGALP00000013355	ENSGALG00000008212	2	0.802	NA
ptr_retrop03071	ptr_retrop03071	16	57787544	57788023	+	ENSPTRP00000009758	ENSPTRG00000005728	13	0.963	0.0002
ptr_retrop03073	ptr_retrop03073	16	57789589	57790068	+	ENSPTRP00000009758	ENSPTRG00000005728	13	0.956	0.0002
ptr_retrop03075	ptr_retrop03075	16	57950749	57951217	+	ENSPTRP00000038960	ENSPTRG00000022808	9	0.709	0.4057
ptriretrom10384	ptriretrom10384	16	58886092	58886631	-	ENSMMUP00000021484	ENSMMUG00000016361	X	0.832	NA
ptr_retrom03266	ENSPTRT00000043458	16	60201493	60201960	-	ENSPTRP00000020489	ENSPTRG00000011928	2A	0.994	0.0067
ptr_retrom03267	ptr_retrom03267	16	62364434	62364896	-	ENSPTRP00000022382	ENSPTRG00000013081	2B	0.761	0.1875
ptr_retrom03269	ptr_retrom03269	16	62534242	62534628	-	ENSPTRP00000013350	ENSPTRG00000007823	16	0.746	0.2929
ptriretrom10422	ptriretrom10422	16	63455775	63456237	-	ENSP00000242827	ENSG00000123179	13	0.942	NA
ptr_retrop03079	ptr_retrop03079	16	63948138	63948618	+	ENSPTRP00000042839	ENSPTRG00000023064	7	0.708	0.276
ptr_retrom03273	ptr_retrom03273	16	65685996	65686339	-	ENSPTRP00000061020	ENSPTRG00000041682	16	0.72	0.4452
ptr_retrom03280	ENSPTRT00000048499	16	67448921	67449529	-	ENSPTRP00000019396	ENSPTRG00000011298	19	0.99	0
ptr_retrop03087	ptr_retrop03087	16	67502867	67503156	+	ENSPTRP00000031780	ENSPTRG00000018618	6	0.794	0.265
ptr_retrom03283	ptr_retrom03283	16	67952050	67952936	-	ENSPTRP00000001688	ENSPTRG00000000979	1	0.596	74.7588
ptriretrop10606	ptriretrop10606	16	67991734	67992038	+	ENSMUSP00000074724	ENSMUSG00000073676	1	0.931	NA
ptr_retrop03091	ptr_retrop03091	16	68131574	68132021	+	ENSPTRP00000019324	ENSPTRG00000011268	19	0.718	0.3395
ptriretrom10498	ptriretrom10498	16	68340542	68340909	-	ENSP00000405160	ENSG00000128951	15	0.699	NA
ptriretrop10624	ptriretrop10624	16	68348670	68349373	+	ENSP00000341885	ENSG00000140988	16	0.73	NA
ptr_retrom03286	ptr_retrom03286	16	69098157	69099555	-	ENSPTRP00000037845	ENSPTRG00000022010	X	0.936	0.0197
ptr_retrop03093	ptr_retrop03093	16	70635402	70635980	+	ENSPTRP00000029350	ENSPTRG00000017155	5	0.969	0.0059
ptr_retrom03293	ptr_retrom03293	16	71367516	71369077	-	ENSPTRP00000016989	ENSPTRG00000009991	18	0.87	0.0739
ptr_retrom03295	ptr_retrom03295	16	71435949	71436247	-	ENSPTRP00000012364	ENSPTRG00000007228	15	0.772	0.2468
ptr_retrop03102	ptr_retrop03102	16	71642596	71642896	+	ENSPTRP00000000986	ENSPTRG00000000565	1	0.874	0.0645
ptr_retrop03103	ptr_retrop03103	16	72084081	72085365	+	ENSPTRP00000008508	ENSPTRG00000004996	12	0.853	0.1448
ptr_retrom03297	ptr_retrom03297	16	73301430	73302314	-	ENSPTRP00000025475	ENSPTRG00000022841	3	0.922	0.0782
ptr_retrop03105	ptr_retrop03105	16	73587448	73587939	+	ENSPTRP00000042839	ENSPTRG00000023064	7	0.836	0.1644
ptriretrom10580	ptriretrom10580	16	74000755	74001036	-	ENSMUSP00000074724	ENSMUSG00000073676	1	0.894	NA
ptr_retrop03107	ptr_retrop03107	16	74057971	74059168	+	ENSPTRP00000009055	ENSPTRG00000005331	12	0.829	0.1211
ptr_retrom03302	ptr_retrom03302	16	74598787	74599562	-	ENSPTRP00000038748	ENSPTRG00000022470	Y	0.792	0.1188
ptr_retrom03310	ptr_retrom03310	16	75132223	75132974	-	ENSPTRP00000001899	ENSPTRG00000001099	1	0.77	0.1127
ptr_retrom03311	ptr_retrom03311	16	75665457	75666022	-	ENSPTRP00000019289	ENSPTRG00000011245	19	0.867	0.2482
ptr_retrom03312	ptr_retrom03312	16	76314913	76315346	-	ENSPTRP00000028167	ENSPTRG00000016401	4	0.733	0.2508
ptr_retrop03109	ENSPTRT00000074242	16	76859551	76860174	+	ENSPTRP00000001146	ENSPTRG00000000659	1	1	0
ptr_retrop03110	ptr_retrop03110	16	77360864	77361343	+	ENSPTRP00000042839	ENSPTRG00000023064	7	0.853	0.1374
ptr_retrom03316	ptr_retrom03316	16	77517245	77518655	-	ENSPTRP00000008490	ENSPTRG00000020404	12	0.573	2.1799
ptr_retrop03112	ptr_retrop03112	16	77835653	77835955	+	ENSPTRP00000025273	ENSPTRG00000014650	3	0.851	0.0981
ptriretrop10750	ptriretrop10750	16	78308577	78309299	+	ENSGALP00000035584	ENSGALG00000017330	1	0.778	NA
ptr_retrom03320	ENSPTRT00000015480	16	81554240	81555355	-	ENSPTRP00000053700	ENSPTRG00000007876	16	0.609	11.1081
ptr_retrom03323	ptr_retrom03323	16	85473915	85474575	-	ENSPTRP00000030891	ENSPTRG00000018085	6	0.864	0.137
ptr_retrom03324	ptr_retrom03324	16	86117432	86118086	-	ENSPTRP00000030690	ENSPTRG00000017982	6	0.744	0.2617
ptr_retrom02831	ptr_retrom02831	17	568303	569050	-	ENSPTRP00000037867	ENSPTRG00000022025	X	0.852	0.1248
ptr_retrom02836	ptr_retrom02836	17	2073008	2073838	-	ENSPTRP00000030290	ENSPTRG00000017740	6	0.787	0.1369
ptriretrop08280	ptriretrop08280	17	2255926	2256504	+	ENSP00000447260	ENSG00000135486	12	0.902	NA
ptr_retrom02838	ptr_retrom02838	17	2536765	2537708	-	ENSPTRP00000014825	ENSPTRG00000008694	17	0.852	0.2695
ptr_retrop02685	ptr_retrop02685	17	3674353	3674832	+	ENSPTRP00000009758	ENSPTRG00000005728	13	0.938	0.0489
ptriretrop08375	ptriretrop08375	17	4235400	4236961	+	ENSP00000399527	ENSG00000163785	3	0.873	NA
ptr_retrop02689	ptr_retrop02689	17	4314113	4315374	+	ENSPTRP00000041117	ENSPTRG00000022830	3	0.806	0.185
ptr_retrop02690	ptr_retrop02690	17	4593176	4593489	+	ENSPTRP00000036292	ENSPTRG00000021245	9	0.867	0.0612
ptr_retrom02942	ptr_retrom02942	17	4729152	4729546	-	ENSPTRP00000031780	ENSPTRG00000018618	6	0.932	0.0706
ptr_retrom02944	ptr_retrom02944	17	4877088	4877507	-	ENSPTRP00000013077	ENSPTRG00000007653	16	0.752	0.5629
ptriretrop08417	ptriretrop08417	17	6780405	6780742	+	ENSGALP00000006308	ENSGALG00000003966	19	0.814	NA
ptr_retrop02699	ENSPTRT00000046785	17	6923610	6924467	+	ENSPTRP00000034400	ENSPTRG00000020092	8	0.997	0.0067
ptriretrop08448	ptriretrop08448	17	7195859	7196485	+	ENSP00000361076	ENSG00000148303	9	0.649	NA
ptr_retrop02701	ptr_retrop02701	17	7367120	7367524	+	ENSPTRP00000026874	ENSPTRG00000015621	3	0.897	9.1926
ptr_retrop02710	ptr_retrop02710	17	8220577	8221158	+	ENSPTRP00000059150	ENSPTRG00000016301	4	0.99	0.0071
ptr_retrop02712	ptr_retrop02712	17	8244795	8245157	+	ENSPTRP00000009758	ENSPTRG00000005728	13	0.694	0.1056
ptriretrop08528	ptriretrop08528	17	8497001	8497333	+	ENSMODP00000017415	ENSMODG00000013929	2	0.775	NA
ptriretrom08533	ptriretrom08533	17	8543382	8543694	-	ENSMUSP00000047904	ENSMUSG00000039163	9	0.812	NA
ptriretrop08537	ptriretrop08537	17	8718260	8718542	+	ENSMMUP00000008895	ENSMMUG00000006760	3	0.924	NA
ptriretrom08541	ptriretrom08541	17	8882518	8882733	-	ENSMUSP00000075150	ENSMUSG00000036751	7	0.736	NA
ptriretrop08557	ptriretrop08557	17	8904795	8905370	+	ENSP00000400467	ENSG00000163682	4	0.88	NA
ptriretrom08558	ptriretrom08558	17	10156074	10157569	-	ENSP00000356903	ENSG00000117143	1	0.834	NA
ptriretrop08631	ptriretrop08631	17	10369508	10370244	+	ENSPPYP00000007896	ENSPPYG00000006975	16	0.87	NA
ptr_retrop02725	ptr_retrop02725	17	10809908	10810490	+	ENSPTRP00000019976	ENSPTRG00000011615	2A	0.974	0.0118
ptriretrop08655	ptriretrop08655	17	11734050	11735386	+	ENSMODP00000034204	ENSMODG00000019877	5	0.881	NA
ptr_retrom02956	ptr_retrom02956	17	11749274	11750348	-	ENSPTRP00000029617	ENSPTRG00000017324	5	0.928	0.0217
ptriretrop08663	ptriretrop08663	17	11792766	11794102	+	ENSMODP00000034204	ENSMODG00000019877	5	0.881	NA
ptriretrop08706	ptriretrop08706	17	12686570	12687144	+	ENSMODP00000003774	ENSMODG00000003096	3	0.71	NA
ptr_retrop02731	ptr_retrop02731	17	13063257	13063860	+	ENSPTRP00000031053	ENSPTRG00000018175	6	0.866	0.0383
ptriretrom08629	ptriretrom08629	17	13975870	13976226	-	ENSP00000417048	ENSG00000162244	3	0.891	NA
ptr_retrom02970	ptr_retrom02970	17	14301863	14302338	-	ENSPTRP00000009758	ENSPTRG00000005728	13	0.931	0.0695
ptriretrop08764	ptriretrop08764	17	14631460	14631846	+	ENSGGOP00000000955	ENSGGOG00000000971	1	0.922	NA
ptr_retrom02979	ptr_retrom02979	17	14671485	14671804	-	ENSPTRP00000039611	ENSPTRG00000016353	4	0.785	0.1718
ptr_retrom02982	ptr_retrom02982	17	14736949	14737449	-	ENSPTRP00000038541	ENSPTRG00000022371	X	0.893	0.1144
ptr_retrom02988	ptr_retrom02988	17	14850747	14851193	-	ENSPTRP00000000818	ENSPTRG00000000467	1	0.89	0.0568
ptriretrop08862	ptriretrop08862	17	16932419	16932781	+	ENSGALP00000006308	ENSGALG00000003966	19	0.926	NA
ptr_retrom02993	ptr_retrom02993	17	17006937	17007424	-	ENSPTRP00000042839	ENSPTRG00000023064	7	0.866	0.1469
ptriretrop08896	ptriretrop08896	17	17549488	17550939	+	ENSMMUP00000002883	ENSMMUG00000002163	11	0.764	NA
ptr_retrom02997	ptr_retrom02997	17	18536375	18536707	-	ENSPTRP00000034700	ENSPTRG00000020264	8	0.884	0.1024
ptr_retrom03002	ptr_retrom03002	17	20061377	20061898	-	ENSPTRP00000018237	ENSPTRG00000010686	19	0.722	0.6008
ptr_retrop02772	ptr_retrop02772	17	20080495	20081011	+	ENSPTRP00000028484	ENSPTRG00000016597	4	0.776	2.4915
ptriretrop08947	ptriretrop08947	17	20083448	20084161	+	ENSPPYP00000007896	ENSPPYG00000006975	16	0.828	NA
ptr_retrop02774	ptr_retrop02774	17	21091788	21092171	+	ENSPTRP00000012123	ENSPTRG00000007094	15	0.906	0.0849
ptr_retrom03004	ptr_retrom03004	17	21237857	21238272	-	ENSPTRP00000017019	ENSPTRG00000010012	18	0.707	0.5929
ptr_retrop02775	ptr_retrop02775	17	21362324	21362792	+	ENSPTRP00000019218	ENSPTRG00000011200	19	0.789	0.2872
ptr_retrom03009	ptr_retrom03009	17	21469325	21470349	-	ENSPTRP00000041441	ENSPTRG00000023584	6	0.849	0.1162
ptr_retrop02778	ptr_retrop02778	17	21552084	21552959	+	ENSPTRP00000029363	ENSPTRG00000017164	5	0.852	0.1351
ptr_retrop02779	ptr_retrop02779	17	21582167	21582429	+	ENSPTRP00000059765	ENSPTRG00000040645	13	0.83	0.0975
ptr_retrom03011	ptr_retrom03011	17	21618077	21618324	-	ENSPTRP00000026642	ENSPTRG00000039248	3	0.75	0.3541
ptr_retrom03013	ptr_retrom03013	17	21772281	21772928	-	ENSPTRP00000009097	ENSPTRG00000005351	12	0.894	0.1452
ptriretrom08845	ptriretrom08845	17	21891062	21891312	-	ENSGGOP00000003183	ENSGGOG00000003241	17	0.733	NA
ptr_retrom03015	ENSPTRT00000034618	17	21963809	21964247	-	ENSPTRP00000042964	ENSPTRG00000024222	4	0.883	0.1841
ptr_retrop02784	ENSPTRT00000017426	17	22942153	22944333	+	ENSPTRP00000016134	ENSPTRG00000009506	17	0.983	0.0147
ptr_retrop02787	ptr_retrop02787	17	24556477	24556886	+	ENSPTRP00000061157	ENSPTRG00000042329	13	0.826	0.1682
ptr_retrop02788	ptr_retrop02788	17	24647401	24647755	+	ENSPTRP00000058878	ENSPTRG00000034506	11	0.835	0.0978
ptr_retrop02789	ptr_retrop02789	17	24766101	24766319	+	ENSPTRP00000017778	ENSPTRG00000010451	19	0.932	0.0625
ptr_retrop02791	ENSPTRT00000073359	17	24883228	24884259	+	ENSPTRP00000016688	ENSPTRG00000009807	17	0.945	0.0584
ptriretrom08870	ptriretrom08870	17	24960461	24961548	-	ENSP00000269886	ENSG00000141985	19	0.866	NA
ptriretrom08879	ptriretrom08879	17	26249770	26250161	-	ENSMUSP00000079628	ENSMUSG00000061787	7	0.9	NA
ptriretrom08895	ptriretrom08895	17	26977040	26978041	-	ENSP00000305810	ENSG00000168818	4	0.934	NA
ptriretrom08898	ptriretrom08898	17	27080070	27080504	-	ENSP00000219479	ENSG00000103202	16	0.71	NA
ptriretrom08906	ptriretrom08906	17	27197616	27198186	-	ENSP00000346022	ENSG00000163682	4	0.74	NA
ptr_retrop02797	ptr_retrop02797	17	27338294	27338674	+	ENSPTRP00000009758	ENSPTRG00000005728	13	0.773	0.2015
ptriretrom08914	ptriretrom08914	17	28271262	28271601	-	ENSMUSP00000083722	ENSMUSG00000073702	1	0.768	NA
ptr_retrom03031	ptr_retrom03031	17	28424732	28425104	-	ENSPTRP00000031780	ENSPTRG00000018618	6	0.762	0.2379
ptr_retrom03032	ptr_retrom03032	17	28426711	28427083	-	ENSPTRP00000031780	ENSPTRG00000018618	6	0.762	0.2373
ptr_retrop02805	ptr_retrop02805	17	28818619	28819669	+	ENSPTRP00000008508	ENSPTRG00000004996	12	0.861	0.184
ptr_retrop02809	ptr_retrop02809	17	29740786	29741329	+	ENSPTRP00000033518	ENSPTRG00000019570	7	0.701	0.4008
ptr_retrom03033	ptr_retrom03033	17	29815246	29815661	-	ENSPTRP00000048733	ENSPTRG00000010970	19	0.683	0.2912
ptr_retrom03034	ptr_retrom03034	17	29821789	29822160	-	ENSPTRP00000039611	ENSPTRG00000016353	4	0.863	0.0702
ptr_retrop02810	ptr_retrop02810	17	30018391	30019706	+	ENSPTRP00000013572	ENSPTRG00000007939	16	0.894	0.1261
ptr_retrom03038	ptr_retrom03038	17	34476248	34476652	-	ENSPTRP00000009758	ENSPTRG00000005728	13	0.956	0.0274
ptriretrom08988	ptriretrom08988	17	35411658	35412029	-	ENSP00000262428	ENSG00000103187	16	0.662	NA
ptr_retrom03049	ptr_retrom03049	17	35875289	35876452	-	ENSPTRP00000034400	ENSPTRG00000020092	8	0.91	0.0685
ptr_retrom03050	ptr_retrom03050	17	35926485	35926828	-	ENSPTRP00000004581	ENSPTRG00000002638	10	0.712	0.3014
ptr_retrom03051	ptr_retrom03051	17	36155210	36155596	-	ENSPTRP00000026324	ENSPTRG00000015270	3	0.752	0.0975
ptriretrom09024	ptriretrom09024	17	36506010	36506593	-	ENSP00000352143	ENSG00000215472	18	0.842	NA
ptriretrom09033	ENSPTRT00000016351	17	36623276	36623827	-	ENSMODP00000030253	ENSMODG00000017722	3	0.543	NA
ptriretrom09050	ptriretrom09050	17	36973404	36973850	-	ENSP00000384925	ENSG00000099901	22	0.866	NA
ptr_retrom03055	ENSPTRT00000072259	17	37315015	37315179	-	ENSPTRP00000061334	ENSPTRG00000040141	19	1	0.0371
ptriretrom09068	ptriretrom09068	17	37608258	37608637	-	ENSPPYP00000005960	ENSPPYG00000005233	13	0.744	NA
ptriretrom09078	ptriretrom09078	17	37609133	37609814	-	ENSMUSP00000099962	ENSMUSG00000062647	2	0.661	NA
ptr_retrom03059	ptr_retrom03059	17	38501943	38502307	-	ENSPTRP00000043396	ENSPTRG00000023202	1	0.885	0.0499
ptr_retrop02819	ptr_retrop02819	17	38573296	38573918	+	ENSPTRP00000014462	ENSPTRG00000008480	16	0.981	0.0433
ptr_retrom03065	ptr_retrom03065	17	38714463	38715333	-	ENSPTRP00000039339	ENSPTRG00000018890	7	0.798	0.8932
ptriretrom09120	ptriretrom09120	17	39113832	39114203	-	ENSP00000262428	ENSG00000103187	16	0.648	NA
ptr_retrop02823	ptr_retrop02823	17	39155786	39158233	+	ENSPTRP00000029071	ENSPTRG00000016972	5	0.9	0.0685
ptr_retrom03070	ptr_retrom03070	17	40480144	40480628	-	ENSPTRP00000042839	ENSPTRG00000023064	7	0.819	0.1626
ptriretrom09143	ptriretrom09143	17	40540922	40541471	-	ENSP00000346022	ENSG00000163682	4	0.839	NA
ptr_retrop02828	ptr_retrop02828	17	41289668	41290060	+	ENSPTRP00000030810	ENSPTRG00000018039	6	0.954	0.0603
ptr_retrom03072	ptr_retrom03072	17	43929227	43929565	-	ENSPTRP00000031995	ENSPTRG00000018746	6	0.894	0.059
ptriretrop09282	ptriretrop09282	17	44036312	44036792	+	ENSPPYP00000005960	ENSPPYG00000005233	13	0.806	NA
ptriretrop09310	ptriretrop09310	17	45358270	45358539	+	ENSP00000437462	ENSG00000111196	12	0.921	NA
ptr_retrom03080	ptr_retrom03080	17	45818518	45818985	-	ENSPTRP00000020489	ENSPTRG00000011928	2A	0.891	0.1036
ptr_retrom03081	ptr_retrom03081	17	47562212	47562610	-	ENSPTRP00000042839	ENSPTRG00000023064	7	0.8	0.4396
ptriretrop09390	ptriretrop09390	17	48368746	48368988	+	ENSP00000453120	ENSG00000140319	15	0.864	NA
ptr_retrop02835	ptr_retrop02835	17	48512991	48513642	+	ENSPTRP00000000463	ENSPTRG00000000262	1	0.865	0.1228
ptriretrop09409	ptriretrop09409	17	48822250	48822534	+	ENSGALP00000012928	ENSGALG00000007971	18	0.811	NA
ptr_retrop02838	ptr_retrop02838	17	49441183	49441928	+	ENSPTRP00000001659	ENSPTRG00000000963	1	0.788	0.2163
ptriretrom09254	ptriretrom09254	17	50099032	50099774	-	ENSGGOP00000021992	ENSGGOG00000008034	8	0.879	NA
ptr_retrop02839	ptr_retrop02839	17	51065620	51066014	+	ENSPTRP00000033279	ENSPTRG00000019451	7	0.556	3.4609
ptr_retrop02840	ptr_retrop02840	17	52464514	52466217	+	ENSPTRP00000001145	ENSPTRG00000000658	1	0.533	71.733
ptr_retrop02843	ptr_retrop02843	17	53132901	53133300	+	ENSPTRP00000036025	ENSPTRG00000021075	9	0.844	0.1036
ptriretrop09466	ptriretrop09466	17	53357049	53357355	+	ENSP00000449490	ENSG00000111245	12	0.505	NA
ptr_retrom03088	ptr_retrom03088	17	53408784	53409197	-	ENSPTRP00000013917	ENSPTRG00000008150	16	0.736	0.2491
ptr_retrop02846	ptr_retrop02846	17	55627566	55627856	+	ENSPTRP00000013350	ENSPTRG00000007823	16	0.835	0.1955
ptriretrom09304	ptriretrom09304	17	57175134	57175722	-	ENSMMUP00000011187	ENSMMUG00000008532	15	0.934	NA
ptriretrom09316	ptriretrom09316	17	57371433	57372446	-	ENSMMUP00000041001	ENSMMUG00000013929	X	0.867	NA
ptr_retrop02861	ptr_retrop02861	17	58002291	58002501	+	ENSPTRP00000020652	ENSPTRG00000012029	2A	0.851	0.2556
ptr_retrop02862	ptr_retrop02862	17	58600989	58601526	+	ENSPTRP00000005010	ENSPTRG00000002851	10	0.801	0.1543
ptr_retrom03097	ptr_retrom03097	17	58819024	58819449	-	ENSPTRP00000033422	ENSPTRG00000019520	7	0.873	9.4902
ptriretrom09344	ptriretrom09344	17	58968395	58968738	-	ENSMMUP00000001790	ENSMMUG00000001340	2	0.713	NA
ptriretrop09539	ptriretrop09539	17	59040281	59040603	+	ENSGGOP00000019458	ENSGGOG00000022928	5	0.641	NA
ptr_retrom03100	ptr_retrom03100	17	59161778	59162262	-	ENSPTRP00000038960	ENSPTRG00000022808	9	0.945	0.0301
ptriretrom09365	ptriretrom09365	17	59474711	59475061	-	ENSP00000446503	ENSG00000241343	X	0.887	NA
ptr_retrop02864	ptr_retrop02864	17	59557467	59558727	+	ENSPTRP00000008508	ENSPTRG00000004996	12	0.812	0.1979
ptriretrop09558	ptriretrop09558	17	59805015	59805401	+	ENSP00000389103	ENSG00000198242	17	0.961	NA
ptriretrom09369	NA	17	60343561	60344205	-	ENSPPYP00000005320	ENSPPYG00000004670	12	0.926	NA
ptriretrom09380	ptriretrom09380	17	60894652	60898306	-	ENSP00000215591	ENSG00000099821	19	0.971	NA
ptr_retrop02867	ptr_retrop02867	17	61122513	61122857	+	ENSPTRP00000029189	ENSPTRG00000017052	5	0.826	0.1922
ptr_retrop02868	ptr_retrop02868	17	61575166	61575690	+	ENSPTRP00000023537	ENSPTRG00000013682	20	0.794	0.1966
ptr_retrom03107	ptr_retrom03107	17	61688782	61689116	-	ENSPTRP00000006597	ENSPTRG00000003834	11	0.83	0.2839
ptr_retrom03108	ptr_retrom03108	17	62085329	62085880	-	ENSPTRP00000009486	ENSPTRG00000005584	12	0.795	0.1131
ptr_retrom03109	ptr_retrom03109	17	62356760	62357174	-	ENSPTRP00000020653	ENSPTRG00000012030	2A	0.826	0.1195
ptriretrom09438	ENSPTRT00000059444	17	63073185	63073490	-	ENSGALP00000027030	ENSGALG00000016775	1	0.804	NA
ptr_retrom03119	ptr_retrom03119	17	64286820	64287407	-	ENSPTRP00000030690	ENSPTRG00000017982	6	0.883	0.1275
ptr_retrop02869	ptr_retrop02869	17	64298133	64298614	+	ENSPTRP00000044768	ENSPTRG00000020134	8	0.863	0.093
ptriretrom09466	ptriretrom09466	17	64649307	64649684	-	ENSP00000219169	ENSG00000102898	16	0.921	NA
ptr_retrop02870	ptr_retrop02870	17	64848025	64848846	+	ENSPTRP00000014246	ENSPTRG00000008343	16	0.872	0.1198
ptr_retrop02871	ptr_retrop02871	17	65407131	65407594	+	ENSPTRP00000042839	ENSPTRG00000023064	7	0.675	0.1707
ptriretrop09639	ptriretrop09639	17	65878797	65879110	+	ENSPPYP00000023470	ENSPPYG00000025837	X	0.915	NA
ptriretrop09646	ptriretrop09646	17	66073814	66074151	+	ENSMODP00000011471	ENSMODG00000009190	1	0.722	NA
ptr_retrop02876	ptr_retrop02876	17	66448195	66448675	+	ENSPTRP00000017019	ENSPTRG00000010012	18	0.836	0.0856
ptriretrom09483	ptriretrom09483	17	66889589	66890688	-	ENSP00000269886	ENSG00000141985	19	0.861	NA
ptr_retrop02877	ptr_retrop02877	17	68097532	68097761	+	ENSPTRP00000020652	ENSPTRG00000012029	2A	0.882	0.1533
ptr_retrop02893	ptr_retrop02893	17	69032033	69032467	+	ENSPTRP00000043284	ENSPTRG00000006626	14	0.836	6.0143
ptr_retrop02897	ptr_retrop02897	17	70428064	70428534	+	ENSPTRP00000008645	ENSPTRG00000005080	12	0.872	0.1793
ptriretrop09712	ptriretrop09712	17	71451916	71452279	+	ENSMMUP00000001790	ENSMMUG00000001340	2	0.768	NA
ptr_retrom03127	ptr_retrom03127	17	71924187	71924621	-	ENSPTRP00000048113	ENSPTRG00000017154	5	0.924	0.0637
ptr_retrom03128	ptr_retrom03128	17	72026666	72026986	-	ENSPTRP00000012852	ENSPTRG00000007525	16	0.778	0.1155
ptr_retrop02904	ptr_retrop02904	17	72225276	72225665	+	ENSPTRP00000013350	ENSPTRG00000007823	16	0.985	0.0153
[truncated: 3,084 more rows]

## Sheet: Gorilla
# Supplemental Table S1: Retrocopy annotation in gorilla (genome assembly version: gorGor3.1)
[truncated: 4,642 more rows]

## Sheet: Orangutan
# Supplemental Table S1: Retrocopy annotation in orangutan (genome assembly version: PPYG2)
[truncated: 5,131 more rows]

[truncated: 8 more sheets: Macaque, Mouse, Rat, Opossum, Platypus, Chicken, Tasmanian devil, Wallaby]
