# Supplementary material for: The life history of retrocopies illuminates the evolution of new mammalian genes
Source: HighWire-hosted journal article supplement (doi:10.1101/gr.198473.115), 2016-01-04
Supplement: Supplemental_Tables.zip [file Supplemental_Table_S2.xlsx]

## Sheet: Human
# Supplemental Table S2: Retrocopy expression (≥1 unique read) in human
# The number of unique reads refers to those mapped in all samples from the same organ
# The number of unique reads mapping on each retrocopy locus (as defined in Supplemental Table S1) was obtained using the CoverageBed function from the Bedtools suite.
retro_ID	Brain	Cerebellum	Heart	Kidney	Liver	Testis
hsa_retrop33328	0	0	0	0	0	9
hsa_retrom24517	2	0	4	2	0	1
hsa_retrop25936	7	5	10	4	1	11
hsa_retrom27189	0	0	2	1	2	3
hsa_retrom08497	0	0	0	1	1	769
hsa_retrom01325	0	0	0	0	0	2
hsa_retrom06414	0	0	0	0	0	0
hsa_retrop33323	14	0	2	0	0	2
hsa_retrom07839	11	0	0	0	0	1
hsa_retrop33324	0	0	0	0	0	0
hsa_retrom25020	4	3	3	6	3	10
hsa_retrom26008	7	2	1	4	1	3
hsa_retrom22055	0	0	0	0	0	1
hsa_retrom08250	6	0	2	1	0	5
hsa_retrom22053	0	0	0	0	0	2
hsa_retrom08252	8	11	1	3	0	6
hsa_retrop24048	0	0	0	0	0	3
hsairetrom35898	2	1	2	2	0	4
hsa_retrop26151	60	50	32	18	9	24
hsairetrop26327	8	0	0	0	0	11
hsa_retrop41198	0	0	0	0	0	0
hsairetrom02005	1	0	0	0	0	0
hsa_retrom08494	0	0	0	0	0	0
hsa_retrom28165	1	0	0	0	0	5
hsa_retrop37417	6	5	6	0	1	205
hsa_retrom27277	0	0	1	1	2	8
hsa_retrop37413	1	0	0	0	0	0
hsa_retrop37410	0	0	5	1	0	4
hsa_retrop06816	0	0	0	0	0	2
hsa_retrom29065	5	0	2	3	3	5
hsa_retrom27236	4	3	0	1	0	3
hsairetrop38653	0	1	0	0	0	0
hsa_retrom01210	4	0	1	1	2	2
hsa_retrop01841	1	0	0	3	1	0
hsairetrom14860	0	0	0	0	0	6
hsa_retrop33257	0	0	0	0	0	0
hsa_retrom17728	2	1	1	4	0	4
hsa_retrop41206	0	0	0	0	0	0
hsa_retrom17099	0	0	0	0	0	5
hsa_retrop39837	0	0	0	0	0	0
hsa_retrom18716	1	0	0	0	0	2
hsa_retrom28162	1	1	0	0	0	6
hsa_retrom36314	0	1	0	0	0	8
hsa_retrom08787	8	3	11	13	9	6
hsa_retrom40066	0	0	4	0	1	1391
hsa_retrom40747	1	0	0	0	0	381
hsa_retrom40138	1	0	0	0	0	14
hsa_retrom38167	0	0	0	0	0	0
hsa_retrom07901	0	0	0	0	0	0
hsa_retrom24460	0	0	0	0	0	0
hsa_retrom24463	0	0	0	0	0	0
hsa_retrom07902	2	0	0	0	0	1
hsa_retrop37776	0	0	0	0	0	1
hsa_retrop33327	0	0	0	1	0	1
hsa_retrom08076	4	1	0	0	4	6
hsa_retrop18716	6	2	3	9	5	3
hsa_retrom41616	0	0	0	0	0	0
hsa_retrop11144	25	4	3	1	0	11876
hsairetrom11641	21	3	25	259	105	146
hsa_retrom04636	0	0	0	0	0	0
hsa_retrop38058	4	0	0	0	0	2
hsa_retrop10948	9	6	8	4	9	10
hsa_retrom38296	1	0	0	0	0	0
hsa_retrop03731	0	0	0	0	0	0
hsa_retrop16405	0	1	1	0	1	2
hsa_retrom14367	1	0	6	0	0	0
hsa_retrop33281	0	0	0	0	2	1
hsa_retrom41346	1	0	0	0	0	0
hsa_retrop44216	0	0	0	0	0	0
hsa_retrop09919	0	0	0	0	0	14
hsairetrom09331	0	0	0	0	0	1
hsa_retrom40123	0	1	0	0	0	6
hsa_retrop03738	0	0	0	0	0	9
hsa_retrom32684	0	0	0	0	0	3
hsa_retrom39817	0	0	0	0	0	0
hsa_retrop11259	0	0	0	0	0	1
hsa_retrop40956	9	4	0	0	0	54
hsa_retrom41763	0	0	1	1	0	2
hsa_retrom31443	2	0	1	2	2	0
hsa_retrop24632	0	0	0	0	0	0
hsa_retrop42646	0	0	0	0	0	1
hsa_retrom22052	0	0	0	0	0	2
hsa_retrom31910	2	1	0	0	0	1
hsa_retrom18665	5	6	7	5	0	10
hsa_retrom14169	0	1	0	0	0	9
hsa_retrop36781	0	0	2	0	0	2
hsairetrom19562	24	1	1	0	0	2
hsa_retrom38368	0	0	0	1	0	0
hsa_retrom27270	1	0	1	1	1	0
hsa_retrom34435	7	3	5	4	2	3
hsa_retrom14388	0	0	0	0	0	0
hsa_retrom30330	0	0	1	1	0	0
hsa_retrom24644	20	0	0	0	0	5
hsairetrom31776	0	0	0	0	1	2
hsa_retrop24883	3	0	0	0	0	1
hsa_retrom14383	0	0	1	0	0	4
hsa_retrom28621	2	1	2	3	1	2
hsa_retrom42054	0	0	0	1	0	0
hsa_retrom18802	0	0	0	0	0	0
hsa_retrop32518	0	0	0	0	0	2
hsa_retrop17831	5	0	0	2	1	4
hsa_retrom30862	0	0	0	0	0	2
hsa_retrom18808	0	0	0	0	0	2
hsa_retrop12951	9	1	0	0	2	105
hsa_retrom11141	0	0	1	0	1	2
hsa_retrom15494	0	0	1	1	2	5
hsa_retrom40695	0	0	0	0	0	0
hsa_retrop00398	4	2	0	2	1	5
hsa_retrop12954	0	0	0	0	0	1
hsa_retrom04126	1	1	0	0	0	0
hsairetrom24670	1	1	2	0	0	2
hsa_retrom04125	12	5	5	0	2	16
hsa_retrom25202	1	1	1	0	0	1
hsa_retrop10305	0	0	0	0	0	3
hsa_retrop09873	5	0	0	0	0	2
hsa_retrop03605	3	2	2	4	0	1
hsa_retrop08652	0	0	0	0	0	0
hsa_retrop08651	1	0	0	3	0	10
hsa_retrom15165	0	0	0	0	0	2
hsa_retrom08472	2	0	1	0	1	1
hsa_retrom34727	0	0	0	0	0	0
hsa_retrom40334	4	1	0	2	4	3
hsa_retrom40450	0	0	0	0	0	3
hsa_retrom34720	0	1	0	1	0	9
hsa_retrom14708	8	4	3	4	0	4
hsa_retrom30836	0	0	0	0	0	0
hsa_retrom35232	0	0	0	0	0	0
hsairetrop29958	1	0	0	0	0	1
hsa_retrom29717	0	0	0	0	0	0
hsa_retrom36348	5	0	1	18	6	2
hsa_retrom05997	17	1	3	8	2	15
hsa_retrom34547	1	2	0	1	0	15
hsa_retrom34546	0	0	0	0	0	0
hsa_retrom34544	5	0	4	3	0	2
hsa_retrop43775	0	0	0	0	0	1
hsa_retrop34970	0	0	0	0	0	3
hsa_retrop34973	0	0	0	0	0	0
hsairetrop29637	0	0	0	0	0	0
hsa_retrom14949	1	0	1	1	1	5
hsa_retrom11399	1	4	13	3	0	24
hsa_retrop01063	0	1	0	1	0	0
hsairetrop31851	4	0	1	7	5	65
hsa_retrom16844	13	1	1	5	8	1
hsa_retrom04584	1706	411	678	497	272	1058
hsa_retrom11391	0	0	0	0	0	1
hsa_retrop11375	0	0	0	1	1	0
hsa_retrop04082	2	0	0	0	0	0
hsa_retrop39651	7	1	7	11	2	9
hsa_retrom32216	0	0	0	0	0	0
hsa_retrom00743	0	0	1	1	0	0
hsairetrop11179	0	0	0	0	0	0
hsa_retrom29895	1	0	1	0	0	404
hsa_retrop09679	12	0	0	0	0	3
hsa_retrop10234	31	1	0	2	2	31
hsa_retrop24918	0	0	0	0	0	0
hsa_retrom41243	485	51	2	2	1	562
hsa_retrop15879	11	1	7	17	1	7
hsa_retrom15389	7	3	9	5	4	6
hsa_retrop37954	1	1	0	0	0	4
hsa_retrop31854	0	0	0	0	0	1
hsa_retrop36950	0	0	1	1	0	0
hsa_retrom40456	1	0	1	1	1	0
hsa_retrop01468	0	0	0	0	0	0
hsa_retrom15543	4	2	2	3	1	62
hsa_retrom40964	0	0	0	0	0	13
hsa_retrom30179	34	1	2	9	7	153
hsa_retrop29970	77	17	32	24	30	60
hsa_retrom27082	0	0	0	2	0	5
hsa_retrom40968	0	0	0	0	0	8
hsa_retrop03512	2	1	6	4	5	5
hsa_retrop01466	0	0	0	0	0	0
hsa_retrom15549	0	0	0	1	0	1
hsa_retrom39698	0	0	0	0	0	0
hsa_retrom35192	0	0	0	0	0	1
hsa_retrom30592	5	2	2	2	1	7
hsa_retrop15898	0	0	0	0	0	0
hsa_retrom41607	0	0	0	0	1	1
hsa_retrom35584	0	0	0	0	0	4
hsa_retrom10710	5	1	1	2	0	15
hsa_retrop27624	11	7	9	15	2	26
hsa_retrop15890	0	0	0	0	0	2
hsa_retrop28265	1	0	0	0	0	1
hsa_retrop43171	0	1	0	0	0	0
hsa_retrom43357	0	0	0	0	0	0
hsa_retrom30750	0	1	0	0	0	1
hsa_retrom16939	5	1	4	2	0	8
hsa_retrom40984	6	1	6	7	4	6
hsa_retrop39893	0	0	0	3	0	1
hsa_retrom16935	0	0	0	1	0	935
hsa_retrom40980	1	0	0	1	0	0
hsa_retrop34579	0	2	1	1	1	0
hsa_retrom03452	2	0	0	0	0	0
hsa_retrom03103	33	0	0	0	0	6
hsa_retrop04172	1	0	0	0	0	2
hsa_retrop09450	0	0	1	0	0	7
hsa_retrom38108	3	0	0	0	0	0
hsa_retrom16442	9	0	2	3	5	11
hsa_retrop09455	8	30	11	15	0	111
hsa_retrom29250	0	0	0	0	0	1
hsa_retrom11715	2	4	4	2	1	8
hsa_retrom11714	1	0	2	1	1	2
hsa_retrom00324	0	0	0	1	0	0
hsa_retrom37988	0	0	0	0	0	0
hsa_retrom40349	1	0	2	1	1	7600
hsa_retrom29259	1	0	0	1	0	23
hsa_retrom43319	0	0	0	0	0	0
hsa_retrop19956	4	0	0	1	0	1
hsa_retrop24009	502	66	85	86	30	752
hsa_retrop40674	1	0	0	0	1	0
hsa_retrom30355	3	0	0	1	2	44
hsa_retrop16122	0	0	0	0	0	9
hsa_retrom00812	76	16	18	0	1	1978
hsa_retrom42052	27	6	7	13	2	46
hsa_retrop28242	17	10	6	8	3	30
hsa_retrom28875	0	0	0	0	0	6
hsa_retrop24221	0	0	0	0	0	1
hsa_retrom35644	0	0	2	0	0	2010
hsa_retrom29599	0	2	2	7	1	0
hsa_retrop06729	0	0	0	2	0	7
hsairetrom11387	4	3	1	2	1	4
hsa_retrom36766	0	0	0	0	0	0
hsa_retrop01117	0	0	0	0	0	0
hsa_retrom35417	10	0	2	0	0	5
hsa_retrom35414	0	0	0	0	0	0
hsa_retrop44902	0	0	0	0	0	0
hsa_retrop11796	0	0	0	0	0	13
hsa_retrom16629	0	0	0	0	0	1
hsa_retrom38235	0	0	0	0	0	1
hsa_retrom39743	0	0	0	0	0	0
hsa_retrop41755	1	0	0	0	0	3
hsa_retrom35792	16	11	2	0	0	0
hsa_retrom32206	2	3	2	2	2	1
hsa_retrop24719	2	0	1	0	0	0
hsairetrop31601	0	0	0	0	0	15
hsa_retrom00928	24	3	15	9	7	23
hsa_retrop09297	2	0	0	0	0	1
hsa_retrop11552	0	0	0	0	0	0
hsa_retrop38127	1	0	0	0	1	4
hsa_retrom03219	9	19	6	45	3	21
hsa_retrom38129	1	2	1	4	2	2
hsa_retrom31537	20	4	19	34	4	5
hsa_retrom00921	2	0	1	0	0	4
hsairetrom27743	116	51	134	120	94	702
hsairetrop09078	5	0	0	0	0	10
hsa_retrop11559	0	0	0	0	0	7
hsa_retrop08895	0	0	0	0	0	0
hsa_retrop08896	0	0	1	0	0	0
hsa_retrop12553	5	0	1	0	0	0
hsa_retrop29287	2	1	1	0	0	6
hsa_retrop13539	6	5	1	0	2	2
hsa_retrop25267	0	0	0	0	0	48
hsa_retrop37173	0	0	0	1	0	1
hsa_retrom37819	2	0	0	0	0	1
hsa_retrom36810	0	0	0	0	0	0
hsa_retrom35269	0	0	0	0	0	0
hsa_retrop39703	0	0	0	0	0	0
hsa_retrom31240	0	0	0	0	0	1
hsa_retrom38549	0	0	0	0	0	2
hsa_retrop42662	0	0	0	0	0	0
hsa_retrop05773	0	0	0	0	0	0
hsa_retrop17227	3	0	2	1	1	4
hsa_retrom28292	0	0	0	0	0	0
hsa_retrop05775	0	0	0	0	0	0
hsa_retrop32129	238	9	12	2	2	50
hsa_retrop06038	0	0	0	0	0	10
hsa_retrop02002	1	0	0	0	0	0
hsa_retrop40672	4030	1511	1471	1792	884	1821
hsa_retrop02004	0	0	0	0	0	0
hsa_retrop21756	0	0	0	0	0	1
hsa_retrom07594	0	0	0	1	0	0
hsairetrop40115	1	0	0	0	0	0
hsairetrop21141	924	236	1	614	0	16
hsa_retrom26906	256	42	1	4	0	1830
hsa_retrom39439	1	1	1	1	2	4
hsa_retrom41882	0	0	0	0	0	0
hsa_retrop38292	2	0	0	1	0	5
hsa_retrom26972	0	1	0	0	0	0
hsa_retrom16710	0	0	0	1	0	0
hsa_retrop39447	1	0	0	0	0	0
hsa_retrom03676	12	3	5	8	1	9
hsa_retrom04807	0	0	0	0	0	0
hsa_retrom29102	1	1	0	0	0	1
hsa_retrop38012	15	0	0	7	0	23
hsa_retrom04803	0	0	0	0	2	76
hsairetrop29861	0	0	0	0	0	1
hsa_retrom09796	25	8	3	4	1	19
hsa_retrom22292	0	0	0	0	0	11
hsa_retrom09792	23	3	2	5	7	33
hsa_retrom09793	13	0	5	4	0	13
hsairetrom37872	3	0	0	0	0	1
hsa_retrop04951	3	0	4	1	0	6
hsa_retrom30239	0	0	1	0	0	0
hsa_retrom09029	0	0	0	0	0	3
hsairetrom22661	0	0	0	0	0	0
hsa_retrom26341	0	0	0	0	0	0
hsa_retrop21638	153	7	10	9	38	62
hsa_retrop21639	2	9	0	0	0	1
hsa_retrom36385	52	3	4	12	4	58
hsa_retrom16812	9	0	0	3	6	16
hsa_retrop38272	1	0	0	0	0	0
hsa_retrop13159	1	0	0	0	1	0
hsa_retrop03882	0	0	0	0	0	0
hsa_retrom16471	0	0	1	2	1	0
hsa_retrom38042	0	0	0	1	0	0
hsa_retrop32951	12	5	4	3	1	8
hsa_retrop21633	1	0	1	1	1	3
hsa_retrop40587	0	0	0	1	0	0
hsa_retrop13151	0	0	0	0	1	1
hsa_retrop04191	7	0	0	0	0	4
hsa_retrom36149	29	1	4	4	4	22
hsa_retrop37772	0	0	0	0	0	2
hsa_retrom37853	6	1	27	24	5	14
hsa_retrop33067	14	0	13	14	4	15
hsa_retrom38978	3026	496	444	328	229	546
hsa_retrom36141	37	6	4	3	13	123
hsa_retrop30044	9	2	2	0	1	5
hsairetrom26215	3	0	0	0	0	0
hsa_retrop40077	0	0	0	1	0	0
hsa_retrom07683	2	3	3	2	1	2
hsa_retrom36147	5	0	2	2	0	41
hsa_retrop40074	1	0	0	0	0	2
hsa_retrop23701	12	7	2	10	0	0
hsa_retrop12791	0	0	1	0	0	4
hsa_retrop12790	3	3	5	2	3	3
hsairetrom23232	17	2	1	0	2	3
hsa_retrom42584	0	0	0	0	0	0
hsa_retrom28347	0	0	0	1	0	0
hsa_retrom28341	2	0	2	2	0	8
hsa_retrop25062	3	0	0	0	0	3
hsairetrom29587	6	1	5	3	2	9
hsa_retrom02890	1	0	0	0	0	0
hsairetrop03182	0	0	0	0	0	0
hsa_retrom09248	21	11	2	17	1	17
hsa_retrop24189	0	0	0	0	0	9
hsa_retrop12177	1	0	0	0	0	1
hsa_retrop33087	0	1	0	0	2	1
hsa_retrom26577	1	0	0	1	1	0
hsa_retrop33082	0	0	0	0	0	9
hsa_retrop24188	0	0	0	0	0	1
hsa_retrom37639	10	1	1	2	0	1
hsa_retrom22220	2	0	0	0	0	9
hsairetrom28650	1	0	0	0	0	0
hsa_retrom01682	0	0	0	0	0	0
hsa_retrop12774	0	0	0	0	0	0
hsa_retrom01685	16	14	13	4	2	3
hsairetrop41259	0	0	0	0	0	0
hsa_retrom17157	22	8	13	11	6	11
hsa_retrom36613	0	1	3	1	1	0
hsairetrop33127	6	4	3	0	2	2
hsa_retrom22598	4	5	2	5	3	5
hsa_retrop21521	0	0	0	0	2	0
hsa_retrop08878	12	2	0	0	0	0
hsa_retrom22593	4	0	4	11	1	3
hsa_retrom01512	11	33	16	13	8	15
hsa_retrop44175	0	0	0	1	0	0
hsa_retrom08867	2	5	3	18	7	8
hsairetrop12280	0	0	2	0	4	3
hsa_retrop08870	0	0	5	0	0	4568
hsa_retrom07778	3	7	4	4	0	4
hsa_retrom25906	4	1	0	0	0	2
hsa_retrom06317	0	3	0	2	1	4
hsa_retrop16656	10	0	0	2	1	3
hsa_retrop17000	8	1	1	3	0	3
hsa_retrom07773	10	4	24	33	11	34
hsairetrom29340	10	8	8	3	0	5
hsa_retrop40108	0	0	0	0	0	6
hsa_retrom42713	0	0	0	0	0	1
hsa_retrop31420	0	0	0	0	0	0
hsa_retrom01334	0	0	0	0	0	31
hsa_retrom31634	0	0	0	0	0	0
hsa_retrop44751	0	0	0	0	0	0
hsa_retrom40790	0	0	0	0	0	0
hsa_retrom06422	0	0	0	0	1	644
hsairetrom28347	0	0	0	0	0	0
hsa_retrop14545	0	1	2	0	0	96
hsairetrop11411	0	0	0	0	0	0
hsairetrom11818	0	0	0	1	0	0
hsairetrom07538	0	0	1	1	0	2
hsa_retrop13832	1	0	1	0	0	2
hsairetrom02014	0	0	0	0	0	0
hsa_retrom42725	0	0	0	0	0	0
hsa_retrop13836	0	0	2	0	3	4
hsa_retrom14576	15	0	2	2	0	1
hsairetrop29126	0	0	0	0	0	0
hsairetrop32898	0	1	0	0	0	0
hsa_retrop37706	1	3	0	4	1	2
hsa_retrop44356	1	0	0	0	0	0
hsa_retrom05049	0	2	0	0	1	4
hsa_retrom01206	17	2	14	9	1	54
hsa_retrom15452	0	0	0	0	0	0
hsa_retrop01850	0	3	0	0	0	0
hsa_retrop05828	0	0	0	0	1	4
hsa_retrop05826	5	0	0	1	0	3
hsa_retrop39211	6	1	7	2	1	8
hsa_retrop05823	0	0	0	0	0	0
hsa_retrom26372	0	0	0	0	0	2
hsa_retrop32119	0	0	0	0	0	1
hsa_retrop00256	3	0	1	2	4	3
hsa_retrop42745	2	0	0	0	0	0
hsa_retrom07919	0	1	0	0	0	0
hsa_retrom24476	0	0	1	3	0	35
hsairetrop01903	12	7	3	5	0	5
hsa_retrom24474	1	2	4	1	1	7
hsa_retrom01027	1	0	0	1	2	0
hsa_retrom07912	0	0	0	0	0	1
hsa_retrop32114	1	0	1	4	0	2
hsa_retrop42749	2	0	0	0	0	4
hsa_retrom24471	289	95	366	306	70	723
hsa_retrop40929	169	112	87	87	22	45
hsairetrop27118	1	0	0	0	0	6
hsa_retrop11159	3	1	1	1	0	4
hsa_retrop16660	0	1	0	0	0	52
hsairetrop02978	1	0	0	0	0	0
hsa_retrop29226	1	1	0	3	0	1
hsa_retrop03726	0	1	0	2	0	0
hsa_retrom35049	20	12	14	10	12	105
hsa_retrom22334	1	0	0	0	0	1
hsairetrom24049	2	0	0	0	0	0
hsa_retrom17111	0	0	0	2	0	9
hsa_retrop24203	1	1	1	3	0	0
hsa_retrop24826	1	0	0	0	0	0
hsa_retrom14373	0	0	0	12	1	5
hsa_retrom14370	0	0	0	2	0	1
hsa_retrop16464	0	0	0	0	0	0
hsa_retrop36048	0	0	0	0	0	0
hsa_retrom34601	0	0	0	0	0	0
hsa_retrop37948	1	0	0	0	0	1
hsa_retrop36042	1	0	0	0	0	5
hsa_retrom35552	12	62	0	7	0	1
hsa_retrop16468	0	0	0	2	0	4
hsa_retrop42639	0	1	0	0	0	2
hsa_retrom41777	0	1	0	0	1	0
hsa_retrom41770	0	0	0	0	0	0
hsa_retrop34844	1026	522	697	775	286	591
hsa_retrom24875	0	0	0	1	0	1
hsa_retrop32206	8	0	0	1	1	8
hsa_retrom14179	0	0	0	2	2	4
hsa_retrom26797	1	0	2	0	0	43
hsa_retrom39759	1	0	2	0	0	0
hsa_retrop33192	0	0	0	0	0	0
hsairetrom33263	11	1	7	12	2	221
hsa_retrom34424	0	0	0	0	0	0
hsa_retrom10386	18	3	0	2	2	571
hsa_retrop43370	0	0	0	0	0	0
hsa_retrop44133	0	0	0	0	0	0
hsa_retrom14396	0	0	0	0	0	5
hsa_retrom41812	0	0	0	0	0	0
hsa_retrom14390	0	0	0	0	0	1
hsa_retrop03311	2	0	0	0	0	0
hsa_retrop43584	1	1	1	1	0	6
hsa_retrop28027	4	0	0	0	1	1
hsa_retrop17827	1	0	0	0	1	11
hsa_retrop00415	1	1	0	4	0	1
hsa_retrop21238	343	106	173	189	82	185
hsa_retrop36545	0	0	0	0	0	0
hsa_retrom24894	7	3	0	0	0	5
hsa_retrop37891	9	3	3	12	9	10
hsa_retrop10844	1	2	0	0	2	9
hsa_retrop10333	0	0	0	0	0	0
hsa_retrom40355	2	1	0	1	0	2
hsairetrop34050	5	0	3	1	0	1
hsa_retrom10476	1	0	0	0	0	1
hsa_retrom10470	0	0	0	0	0	0
hsa_retrop31246	9	0	7	1	2	0
hsa_retrom04154	1	0	0	0	1	0
hsa_retrop32958	0	0	0	0	0	0
hsairetrop05576	0	0	0	0	0	0
hsa_retrop03610	0	0	0	0	0	1
hsa_retrom35833	0	0	0	0	0	0
hsa_retrop08647	4	0	2	1	0	1
hsa_retrop33053	2	0	1	0	0	0
hsairetrom21962	2077	83	153	151	71	170
hsairetrom32244	0	0	1	0	0	1
hsa_retrom18666	9	0	0	0	1	1
hsa_retrom34732	2	0	3	1	0	0
hsa_retrop29796	4	1	4	7	0	3
hsa_retrom14718	0	0	0	0	0	1
hsairetrop39424	7	7	18	11	16	98
hsa_retrop42516	1	0	0	0	0	0
hsa_retrop43765	0	0	0	0	0	0
hsa_retrom39379	0	0	0	0	0	0
hsa_retrom34559	8	0	0	0	0	0
hsa_retrop43760	0	0	0	0	0	0
hsa_retrom34554	0	0	0	0	0	0
hsa_retrop37371	0	0	0	0	1	0
hsa_retrom25442	2	0	0	1	0	0
hsa_retrom34551	2	3	1	2	0	3
hsa_retrom34552	0	2	1	0	1	4
hsa_retrop13591	59	8	5	3	3	53
hsa_retrom11388	1	0	0	0	2	0
hsa_retrop42822	1	0	0	0	1	0
hsa_retrop31538	0	0	0	0	0	0
hsa_retrop36438	0	0	0	0	0	0
hsa_retrop39312	3	4	1	4	0	11
hsairetrop24499	1765	586	43	48	5	243
hsa_retrop31308	4	5	32	5	19	4
hsa_retrop36430	0	0	0	0	0	0
hsa_retrop14224	60	4	10	9	31	37
hsa_retrop15314	2	0	0	0	0	1
hsa_retrop15316	7	0	1	1	0	649
hsa_retrop09608	0	0	0	4	5	5
hsa_retrop24721	2	0	0	0	0	0
hsa_retrop15311	0	0	0	0	0	5
hsairetrom10088	0	0	0	0	0	0
hsairetrom24993	19	14	17	14	3	48
hsa_retrop16844	0	0	0	0	1	0
hsairetrop14262	5	0	1	0	0	5
hsa_retrop36942	15	3	9	40	4	18
hsa_retrop40142	0	0	0	0	0	0
hsa_retrop44920	0	0	0	0	0	0
hsairetrom10770	0	0	0	0	0	0
hsairetrop23121	0	0	1	0	0	0
hsa_retrop03504	0	0	0	0	0	3
hsa_retrom35062	2	0	4	0	2	2
hsa_retrop08262	0	0	0	1	0	2
hsa_retrom15536	9	2	2	4	7	14
hsa_retrom35950	2	0	1	0	0	4
hsa_retrop39796	7	2	2	6	3	0
hsa_retrom32669	0	0	0	0	0	1
hsairetrop23944	0	0	0	0	0	96
hsa_retrop01473	3	0	3	0	0	2
hsa_retrom27278	1	1	0	2	0	1
hsa_retrop02925	0	0	0	0	0	0
hsa_retrop43688	0	0	0	0	0	0
hsa_retrop15889	9	1	1	4	0	4
hsa_retrom11639	1	0	0	0	0	1
hsa_retrop39469	0	0	0	0	0	0
hsa_retrom38571	8	4	0	4	0	6
hsa_retrom35695	0	0	0	0	0	1
hsa_retrom32721	0	0	0	0	11	0
hsa_retrom38366	0	0	0	0	0	5
hsa_retrop01613	2	0	0	0	0	0
hsa_retrop01614	0	0	0	0	0	0
hsa_retrop01615	0	0	0	0	0	6
hsa_retrop39946	0	0	0	0	0	0
hsa_retrom34802	0	0	0	0	0	0
hsa_retrom16941	0	0	0	0	0	0
hsa_retrom30728	0	0	1	2	0	2
hsa_retrom09062	0	0	0	0	0	11
hsa_retrom16945	0	0	0	0	0	11
hsa_retrom34803	0	0	0	0	0	0
hsa_retrop24581	6	0	0	0	0	14
hsa_retrop05358	25	43	40	18	2	144
hsa_retrop11414	4	5	7	0	7	3
hsa_retrop34562	3	0	0	0	1	2128
hsa_retrop34563	0	0	0	0	0	5
hsa_retrop24587	4	2	0	1	0	1
hsa_retrop43494	1	0	0	0	0	0
hsa_retrop05351	7	0	0	0	0	2
hsa_retrop25521	0	0	0	0	0	0
hsa_retrom16437	2	0	0	1	1	2
hsa_retrom03449	4	3	0	0	0	6
hsa_retrop11419	1	0	0	1	1	3
hsa_retrop18431	3	0	0	2	0	2
hsa_retrop18121	0	0	1	0	0	6
hsa_retrop02818	0	0	0	0	0	0
hsa_retrom10659	0	0	0	0	0	0
hsa_retrop34515	7	5	5	4	7	8
hsa_retrom16252	0	0	0	0	0	0
hsa_retrom38240	0	0	2	0	0	1212
hsa_retrom15445	0	0	0	0	0	0
hsa_retrom38948	0	0	0	2	1	1
hsa_retrom11708	0	0	0	0	0	1
hsa_retrop43533	1	0	0	0	0	0
hsa_retrom15441	0	0	2	0	1	2
hsa_retrop28928	4	0	1	0	3	145
hsa_retrop44988	0	0	0	0	0	0
hsa_retrop31978	1	2	2	3	0	16
hsa_retrom11529	13	0	0	4	0	4
hsa_retrom36778	1	0	0	5	1	3
hsa_retrom29948	2	0	0	0	0	2
hsa_retrom36775	14	5	10	36	16	68
hsa_retrom32222	0	0	0	0	0	1
hsa_retrom11522	0	0	0	0	1	0
hsa_retrop43964	1	0	0	0	0	0
hsa_retrop44795	0	0	0	0	0	0
hsa_retrop41389	0	0	0	1	0	2
hsa_retrom39487	13	0	0	0	0	1
hsa_retrop36657	2	3	6	2	1	3
hsa_retrom25437	0	0	0	0	0	2
hsa_retrom16254	7	1	35	20	7	6
hsa_retrop15271	7	0	0	24	13	3
hsa_retrom34950	0	0	0	0	0	0
hsa_retrom34951	0	0	0	2	0	3
hsa_retrop18310	0	0	0	0	0	1
hsa_retrop25297	4	1	0	0	0	0
hsa_retrop30298	9	8	2	5	8	9
hsa_retrom16555	7	0	1	2	0	13
hsa_retrom34958	13	1	2	14	2	23
hsa_retrom29023	0	0	0	0	1	59
hsa_retrop20345	0	0	0	0	0	0
hsa_retrop31742	41	68	60	185	74	49
hsa_retrop40744	0	0	1	0	7	23
hsa_retrom04923	0	0	0	3	4	1
hsa_retrom16546	4	0	1	0	0	0
hsa_retrop11527	0	0	0	4	0	0
hsa_retrop15275	3	1	2	0	1	25
hsairetrom32977	0	0	1	0	0	0
hsa_retrop11524	0	0	0	1	0	334
hsa_retrom31522	0	0	0	2	0	1
hsa_retrom16893	4	0	0	0	0	0
hsa_retrop11528	0	0	0	0	0	0
hsa_retrop18050	12	1	1	10	0	4
hsa_retrop33176	2	0	0	0	0	15
hsa_retrop24904	2	0	0	4	3	2
hsa_retrom16896	0	0	0	0	0	131
hsa_retrop37145	6	0	1	1	1	1
hsa_retrop08883	1	3	2	8	5	16
hsa_retrop16069	0	0	1	3	2	0
hsa_retrom37822	11	22	0	3	2	6
hsa_retrom29755	0	0	0	0	0	2
hsa_retrop30098	4	0	0	0	0	0
hsa_retrop27969	3	7	0	0	0	8
hsa_retrom37828	1	0	0	0	0	0
hsa_retrop31879	2	0	2	1	0	5
hsairetrop21688	0	0	0	0	0	0
hsa_retrom36800	0	0	0	0	0	0
hsa_retrom14068	6	8	54	0	2	5
hsa_retrop32968	7	1	4	1	1	16
hsa_retrop31250	25	13	6	8	14	7
hsairetrom00928	0	0	0	0	0	4
hsa_retrop40668	1	0	0	0	0	8
hsa_retrom29513	0	0	0	0	0	3
hsa_retrop43516	0	0	0	0	0	0
hsa_retrop13786	1	0	5	5	4	1704
hsa_retrop25580	0	0	0	0	0	30
hsa_retrop05766	4	1	0	1	0	2
hsa_retrom06188	1	0	0	1	0	0
hsa_retrom03068	0	0	0	0	0	0
hsa_retrom28758	0	0	0	0	0	2
hsa_retrop30278	2	0	0	1	0	10
hsa_retrop31254	1	0	0	0	2	1
hsa_retrom31822	4	0	1	6	2	0
hsa_retrop08653	0	0	1	0	1	1
hsa_retrom16093	0	0	0	0	0	7
hsa_retrop26041	0	0	0	0	0	3
hsa_retrom16095	1	2	3	3	2	2
hsa_retrom39881	3	0	16	0	11	0
hsa_retrom15161	0	0	0	1	0	1
hsa_retrop40252	9	0	1	0	0	6
hsa_retrom04811	0	0	0	0	0	0
hsa_retrom04816	1	1	0	0	1	5
hsa_retrom31563	0	0	0	0	0	718
hsa_retrop11631	0	2	0	1	0	0
hsairetrop00609	0	0	1	1	0	0
hsa_retrop04965	0	2	0	0	0	3
hsairetrop04437	0	0	0	0	0	0
hsa_retrom42484	0	0	0	0	0	0
hsa_retrom06094	2	0	1	4	0	8
hsa_retrop04960	0	0	0	0	0	0
hsa_retrop37153	0	0	0	0	0	0
hsairetrop24795	49	40	9	27	23	104
hsa_retrop03294	0	0	0	0	0	1
hsa_retrop15465	6	0	0	1	0	11
hsa_retrop15463	1	2	1	0	0	0
hsa_retrop03290	0	0	0	0	0	0
hsa_retrop41207	0	0	0	0	0	0
hsa_retrom31968	2	0	0	0	0	2
hsa_retrop21604	6909	2289	6487	2887	1396	1755
hsa_retrop37018	4	1	0	5	0	8
hsa_retrop42354	0	0	0	0	0	0
hsa_retrop36050	0	0	0	0	0	0
hsa_retrom27425	0	0	0	0	0	3
hsa_retrop37091	0	0	0	0	0	0
hsa_retrop35579	0	0	0	0	0	4
hsa_retrom36150	0	0	0	0	0	0
hsa_retrop05613	0	0	0	0	0	1
hsa_retrop13491	0	0	1	0	0	0
hsairetrop30033	2	0	0	1	1	38
hsa_retrop30051	0	0	0	2	0	8
hsa_retrom35603	0	0	0	0	0	0
hsa_retrom35601	0	0	0	0	0	0
hsa_retrom09304	0	0	1	0	0	0
hsa_retrom09655	1	1	0	0	0	1
hsa_retrop10454	2	0	4	0	1	0
hsa_retrom37987	0	0	0	0	0	1
hsa_retrop25169	13	7	5	2	1	58
hsa_retrom16165	27	6	3	1	0	9
hsa_retrop29297	0	0	0	0	0	41
hsairetrom03310	0	0	0	0	0	3
hsa_retrom27531	3	0	1	1	0	1
hsa_retrop38678	0	0	0	0	0	29
hsa_retrom16163	1	0	0	0	0	12
hsa_retrop25075	1	0	0	0	0	0
hsa_retrom22105	2	0	0	0	0	0
hsa_retrom38185	0	0	0	0	0	0
hsa_retrop38679	0	0	0	0	0	46
hsa_retrop42855	0	0	0	0	0	0
hsairetrom09423	0	0	0	0	0	0
hsa_retrop12160	2	2	0	1	0	0
hsa_retrom09472	1	0	0	2	0	1
hsa_retrop15796	46	20	12	11	14	110
hsa_retrop44299	60	32	27	12	5	9
hsa_retrop37630	0	1	0	1	0	3
hsa_retrom26243	0	0	0	0	1	135
hsa_retrop12769	1	0	0	1	0	1
hsa_retrom41065	5	1	15	3	0	15
hsa_retrop25983	2	1	3	0	0	10
hsa_retrom37791	92	26	16	25	7	243
hsa_retrom27038	49	12	34	70	14	112
hsa_retrop12760	2	0	0	1	0	2
hsairetrop02602	4	2	2	2	2	23
hsa_retrom01837	43	9	10	47	482	45
hsa_retrom01524	1	1	0	1	0	0
hsa_retrop40286	0	0	0	0	0	3
hsa_retrop32920	0	0	0	0	0	2
hsa_retrop01912	1	0	0	0	1	2
hsa_retrom36016	0	0	0	0	0	13
hsa_retrop39161	2	0	0	0	0	0
hsa_retrop21518	13	0	0	0	0	0
hsa_retrop08866	0	0	0	0	0	0
hsa_retrom17148	0	0	0	0	0	0
hsairetrop11982	0	0	0	0	0	0
hsa_retrop40446	0	0	0	0	0	5
hsa_retrom25910	0	0	1	0	0	0
hsa_retrom29984	0	0	0	0	0	34
hsairetrop06288	0	0	0	0	0	0
hsa_retrop40111	0	0	1	0	0	0
hsa_retrom25914	3	2	1	2	1	4
hsa_retrop40441	1	0	0	0	0	14
hsa_retrom22612	0	0	0	0	0	0
hsa_retrom14847	0	0	0	0	0	0
hsa_retrom22614	0	0	0	0	0	1
hsa_retrom37179	0	0	0	0	0	0
hsa_retrop33343	0	0	0	0	0	1
hsa_retrom30213	0	0	0	0	0	3
hsa_retrop33341	0	6	3	5	6	8
hsa_retrop33285	0	0	0	0	0	0
hsa_retrom32703	0	0	0	0	0	0
hsa_retrop40754	2	0	0	0	0	3
hsa_retrop33345	3	1	0	0	0	12
hsa_retrop44883	4	3	0	0	0	1
hsa_retrop11093	0	0	0	0	0	1
hsa_retrop16243	33	4	2	0	0	196
hsa_retrop43475	2	5	0	0	0	3
hsa_retrop11090	1	2	1	4	1	201
hsa_retrop40847	4	2	2	0	2	15
hsa_retrop11094	57	15	2	96	0	17
hsa_retrop23939	13	0	0	0	0	2
hsa_retrom14544	5	0	0	1	0	0
hsa_retrop26170	0	0	0	0	0	1
hsa_retrom26792	2	0	2	1	0	1
hsa_retrom26066	12	10	3	0	3	20
hsairetrop11404	0	0	0	0	0	3
hsa_retrop28056	0	0	0	0	0	0
hsa_retrom02937	0	1	1	1	0	1
hsairetrop18912	0	0	0	0	0	0
hsa_retrop13823	10	25	17	44	14	16
hsa_retrom02932	2	2	3	2	0	3
hsa_retrop13826	0	0	0	0	0	0
hsa_retrop32691	2	0	1	0	0	4
hsa_retrom38269	0	0	0	0	0	0
hsa_retrop37218	1	0	0	1	0	0
hsa_retrom22093	2	0	4	2	2	6
hsa_retrom17707	7	3	4	1	0	6
hsa_retrom05039	29	0	1	2	1	16
hsa_retrop44885	0	0	0	0	0	0
hsairetrom28090	6	0	0	0	0	1
hsa_retrop16663	4	3	2	3	1	0
hsa_retrop36308	0	0	1	0	0	1
hsa_retrop01821	2	0	3	1	0	0
hsa_retrop05838	12	1	0	6	0	3
hsa_retrom09278	2	0	0	0	0	1
hsa_retrop17108	6	2	0	0	0	0
hsa_retrop05836	3	0	0	1	0	2
hsairetrom28536	0	0	0	0	0	3
hsa_retrop41229	0	0	0	0	0	0
hsa_retrom32131	1	1	0	0	0	290
hsa_retrom28994	0	1	0	0	0	0
hsa_retrom28997	18	0	4	1	0	7
hsa_retrom08059	2	3	0	2	0	1
hsa_retrom40770	0	0	0	0	0	0
hsa_retrom40127	0	0	0	1	0	0
hsa_retrop41157	0	0	0	0	0	0
hsa_retrop41404	22	4	2	11	0	4
hsa_retrop41312	1	0	0	1	0	0
hsa_retrom24407	0	0	0	1	2	3
hsa_retrop40749	0	0	0	0	0	1
hsa_retrom08055	4	2	4	8	11	0
hsa_retrom40509	0	0	0	0	0	0
hsa_retrom43283	0	0	0	0	0	0
hsa_retrom35335	0	0	0	1	0	5
hsa_retrop40560	2	0	0	1	1	0
hsa_retrom02623	0	0	0	0	0	3
hsa_retrop03757	49	5	42	31	33	21
hsa_retrom41931	9	2	1	3	0	22
hsa_retrop03754	4	0	0	2	0	1
hsa_retrom34635	0	0	0	0	0	0
hsa_retrom37231	0	0	0	0	0	0
hsa_retrop13956	2	1	4	2	1	15
hsa_retrop24856	3	0	0	0	1	4
hsa_retrop16472	1	0	1	0	0	2
hsa_retrop16473	3	0	0	0	0	3
hsa_retrop43721	1	0	0	1	0	0
hsa_retrom41142	2	0	1	3	1	4
hsa_retrop32890	1	0	0	0	0	0
hsa_retrop09935	3	0	0	0	0	1
hsa_retrop16479	0	0	0	0	0	0
hsa_retrom08839	0	0	0	2	5	1
hsairetrom03253	1	8	1	1	1	29
hsairetrom31193	0	2	3	3	1	4
hsa_retrom01308	403	79	91	79	54	382
hsa_retrom14495	15	1	12	18	10	23
hsa_retrom16846	0	13	0	0	0	4
hsa_retrop32578	8	3	9	6	2	3
hsa_retrop06903	3	2	8	3	1	5
hsa_retrop42575	8	0	0	0	0	0
hsa_retrom10397	53	3	12	20	15	40
hsa_retrom18354	16	5	24	14	22	15
hsa_retrom10399	0	0	0	0	0	0
hsa_retrom18356	1	1	2	2	2	5
hsa_retrop39250	3	0	0	1	0	95
hsa_retrop20004	17	4	1	2	0	37
hsa_retrop42666	0	0	0	0	0	18
hsa_retrom35444	40	4	19	30	9	57
hsairetrom27435	122	3	3	1	1	24
hsa_retrop24939	0	0	0	1	0	1
hsa_retrop41165	0	0	0	0	0	0
hsa_retrom08690	1	1	0	1	0	1
hsa_retrop18330	2	0	2	0	0	0
hsairetrom35430	11	3	4	1	0	4
hsa_retrop31274	3	3	3	2	0	1
hsa_retrop10321	0	0	0	0	0	0
hsa_retrop24935	0	0	0	0	0	0
hsa_retrop24937	7	3	0	0	0	20
hsa_retrom10462	0	0	0	0	0	22
hsairetrop00673	0	0	0	0	0	0
hsa_retrom08454	27	11	24	12	2	38
hsa_retrom16849	0	0	0	1	1	2
hsa_retrom15630	2	0	0	0	0	0
hsa_retrop11198	2	0	4	1	1	6
hsa_retrom09909	18	6	5	5	12	21
hsa_retrom19192	33	3	6	1	2	14
hsa_retrom04149	1	0	0	0	0	3
hsa_retrop31475	2	0	1	1	3	1
hsa_retrom10469	2	0	0	0	0	0
hsa_retrop43977	0	0	0	1	0	7
hsa_retrom09902	2	1	0	0	0	0
hsairetrom33302	0	0	0	0	0	101
hsa_retrom42510	0	0	0	0	0	24
hsa_retrom41908	6	0	2	6	2	1
hsa_retrom41050	0	0	0	0	0	3
hsa_retrom34707	3	0	0	0	0	0
hsairetrop38845	1	5	0	1	0	10
hsa_retrom10269	2	0	0	0	0	0
hsa_retrom34569	0	0	0	0	0	0
hsa_retrop42378	1	4	0	1	3	2
hsa_retrom30600	1	1	0	0	0	1
hsa_retrom10489	0	0	0	0	2	207
hsa_retrop08698	7	2	2	4	3	7
hsa_retrop08694	1	0	1	0	0	0
hsa_retrom10483	0	0	0	0	0	0
hsa_retrom14922	0	0	0	1	0	3
hsa_retrop31310	1	0	4	1	1	1
hsa_retrop39857	48	3	6	5	2	108
hsa_retrop01045	1	2	1	1	1	3
hsa_retrop01596	3	0	0	0	0	0
hsa_retrom35961	0	0	0	0	0	0
hsa_retrom28068	42	8	26	31	5	54
hsa_retrop11310	18	2	2	2	0	2
hsa_retrop11191	0	0	1	0	0	1
hsa_retrom04009	0	0	2	0	0	0
hsa_retrop41730	15	3	3	0	0	40
hsa_retrop11317	0	0	0	0	0	18
hsa_retrop09618	0	0	0	0	0	12
hsa_retrom30289	0	0	0	1	0	1
hsa_retrom24221	0	0	1	0	0	1
hsa_retrop24731	11	4	3	2	0	8
hsa_retrop24736	0	0	0	0	0	0
hsairetrop10343	2	1	0	0	2	1
hsa_retrop18209	1	0	1	0	2	0
hsa_retrop36932	0	0	0	0	1	0
hsa_retrom11765	6	4	12	19	8	4
hsa_retrop09614	0	1	1	7	0	4
hsa_retrom28972	2	3	22	7	8	18
hsa_retrom25313	0	0	0	2	1	1
hsa_retrop24710	12	4	1	0	0	2
hsa_retrop03571	0	0	0	0	0	0
hsairetrop25992	0	0	0	0	0	0
hsa_retrop01440	0	0	0	0	0	2
hsa_retrop42288	1	0	1	0	0	1
hsa_retrom34143	0	0	0	0	0	0
hsa_retrop31180	0	0	0	0	0	0
hsa_retrom14034	6	0	2	5	0	5
hsa_retrom34413	0	0	0	0	0	0
hsa_retrom00786	3	1	0	0	0	0
hsairetrop29197	0	0	0	0	0	17
hsa_retrop27647	1	0	0	0	0	5
hsa_retrop28248	0	1	1	2	2	0
hsa_retrop38596	3	4	0	1	1	6
hsairetrop12616	2	2	4	5	1	9
hsa_retrop01627	3	1	0	0	0	0
hsa_retrop01626	4	2	5	3	0	3
hsa_retrop01621	5	0	0	1	2	2
hsa_retrom42368	0	0	0	0	0	0
hsa_retrop24715	0	0	0	0	0	0
hsa_retrop39758	0	0	0	0	1	0
hsa_retrop05585	0	0	0	0	0	21
hsa_retrom37682	6	0	0	0	0	6
hsa_retrop35011	2	0	0	0	0	62
hsa_retrom34897	0	0	0	0	0	0
hsa_retrop22047	0	0	0	0	0	0
hsa_retrom42559	0	0	0	0	0	1
hsa_retrom16953	0	0	0	0	0	0
hsa_retrom16954	0	5	0	0	0	3
hsa_retrom22379	0	1	1	2	0	4
hsa_retrom32643	30	10	5	2	1	3
hsa_retrop04194	3	1	0	1	0	0
hsa_retrom35801	6	9	0	0	1	16
hsa_retrop05345	0	0	0	2	0	0
hsa_retrom11285	1	0	0	0	0	1
hsa_retrop05343	2	0	3	1	0	2
hsairetrom04148	3	0	0	0	1	0
hsa_retrop05341	0	0	0	0	1	0
hsa_retrom16420	4	3	1	0	1	3
hsa_retrop24866	4	8	0	2	4	6
hsa_retrom24135	1	0	0	2	1	2
hsairetrop13582	3	0	0	5	1	26
hsairetrop24000	8	1	0	0	0	25
hsairetrom18830	123	77	80	84	24	79
hsa_retrop36599	0	0	0	3	0	9
hsairetrom00135	0	0	0	0	0	0
hsa_retrop36843	0	0	0	0	0	1
hsa_retrom27555	3	0	0	0	0	0
hsa_retrom15454	0	0	0	1	0	0
hsairetrom00680	1	0	0	1	3	0
hsa_retrom15456	1	0	0	0	0	4
hsa_retrom31886	13	1	1	3	8	1
hsa_retrom32714	1	0	0	2	1	1
hsa_retrom16105	1	2	1	2	0	60
hsa_retrop02806	0	0	0	12	0	2
hsa_retrop12990	1	1	0	1	0	2
hsa_retrop25951	62	27	23	24	1	22
hsa_retrom31462	0	0	0	0	0	1
hsa_retrom00872	5	1	0	2	0	3
hsa_retrom31460	0	0	0	0	0	2
hsa_retrop09329	164	46	9	59	15	76
hsairetrop29577	0	0	0	0	0	0
hsa_retrom31396	1554	462	475	440	454	3196
hsa_retrom21416	0	1	0	0	0	1
hsa_retrop28020	0	0	0	0	0	0
hsa_retrop43295	2	4	0	0	0	0
hsa_retrom41545	0	0	0	0	0	0
hsa_retrom11514	4	4	3	5	1	17
hsa_retrop28025	6	0	2	1	0	10
hsa_retrop10685	5	1	10	9	11	11
hsa_retrop28753	2	2	2	1	3	3
hsairetrop34055	2	0	0	0	0	0
hsa_retrop10682	37	21	14	14	9	10
hsa_retrop01133	9	2	6	3	7	13
hsairetrop12501	1	0	1	2	0	3
hsa_retrop43385	0	0	0	0	0	0
hsa_retrop10688	142	39	58	37	9	3276
hsa_retrom35168	0	0	0	0	0	98
hsa_retrom14504	0	1	1	2	0	4
hsa_retrop39016	1	0	0	0	0	1
hsa_retrom03278	0	0	0	1	0	2
hsa_retrom29581	5	0	0	1	0	2
hsairetrom38640	0	0	0	0	0	1
hsa_retrom37330	0	0	0	0	0	0
hsairetrop31661	0	0	0	0	0	0
hsa_retrop38605	0	0	1	1	0	0
hsa_retrom03275	0	0	0	0	0	1
hsa_retrom40219	0	0	0	0	0	6
hsa_retrom16886	0	0	1	0	0	0
hsa_retrom00277	5	1	0	0	1	30
hsairetrom27981	0	0	0	1	0	0
hsa_retrop13224	3	0	0	0	0	1
hsa_retrom16553	8	1	7	1	0	10
hsa_retrop38603	1	0	0	0	1	5
hsa_retrom41610	17	5	8	2	2	18
hsa_retrop39882	31	0	2	0	0	12
hsa_retrom11351	4	2	2	2	0	2
hsa_retrom16889	0	0	0	0	0	1
hsa_retrop12570	0	0	0	0	0	0
hsairetrop31802	6	7	48	3	11	13
hsa_retrop31864	2	0	1	0	0	0
hsa_retrop29276	0	0	0	0	0	0
hsa_retrop38674	0	0	0	0	0	2
hsa_retrom29565	1	0	0	0	0	0
hsa_retrop13001	4	0	0	0	0	0
hsa_retrop25247	2	0	0	0	0	17
hsa_retrop16077	1	0	2	1	0	6
hsa_retrop28116	1	0	1	0	0	4
hsa_retrop17249	0	0	0	0	0	0
hsa_retrop40618	7	10	6	8	3	10
hsa_retrop28112	0	0	0	0	0	0
hsa_retrom36011	0	0	0	0	0	3
hsa_retrom40765	3	0	0	0	0	12
hsa_retrop29196	0	0	0	0	0	0
hsa_retrop17246	0	0	0	0	0	0
hsa_retrom03097	0	0	0	0	0	0
hsairetrop28990	11	0	0	1	0	18
hsa_retrom35762	5	6	2	5	0	5
hsa_retrop30208	98	5	4	2	2	134
hsa_retrop10594	1	2	0	1	1	2
hsa_retrop32712	0	0	0	0	0	0
hsa_retrop10599	3	0	1	0	0	2
hsa_retrop25644	49	2	1	2	2	1
hsa_retrop17481	0	0	0	0	0	4
hsa_retrop34768	62	8	12	20	14	271
hsa_retrom28745	0	0	0	0	0	0
hsairetrom26364	0	0	0	0	2	1
hsa_retrom28747	18	3	11	9	5	34
hsa_retrom03307	13	3	10	10	6	7
hsa_retrom02781	1	0	0	0	0	3
hsa_retrom28188	0	0	0	1	0	2
hsa_retrop32710	1	0	0	1	1	0
hsairetrop36438	0	0	0	0	0	2
hsa_retrop11629	0	0	0	0	0	0
hsairetrom04210	2	0	0	1	0	0
hsa_retrom35953	0	0	2	0	1	5
hsa_retrop11625	1	0	0	0	0	1
hsa_retrom27321	0	0	0	0	0	1
hsa_retrop42902	4	0	0	0	0	228
hsa_retrom27253	21	19	6	19	6	269
hsa_retrop04973	0	0	0	0	0	2
hsa_retrop08988	0	0	0	0	0	0
hsa_retrop31918	1	0	2	6	0	40
hsa_retrom22388	2	0	0	1	8	10
hsa_retrom36122	47	18	2	0	0	19
hsa_retrop08983	1	0	0	0	0	0
hsairetrom11909	0	0	0	0	0	0
hsairetrop03348	11	2	2	1	0	11
hsa_retrop29554	264	25	14	87	31	384
hsa_retrop37082	2	0	0	0	0	0
hsairetrom09635	2	1	0	0	0	3
hsa_retrom14078	14	6	16	6	2	113
hsa_retrop13176	0	0	0	1	2	0
hsa_retrop05622	3	1	0	3	0	0
hsa_retrop38215	0	0	0	0	0	0
hsairetrom38253	0	0	0	0	0	42
hsa_retrop38218	3	4	3	2	13	3
hsa_retrop21619	6	0	0	0	0	5
hsa_retrop03972	0	0	0	2	1	1
hsa_retrop13483	2	1	1	2	0	48
hsa_retrop16116	13	3	1	2	0	4
hsa_retrop37081	0	0	0	0	0	0
hsa_retrop35585	0	0	0	0	0	19
hsa_retrom09481	2	1	0	0	0	2
hsa_retrom09486	0	0	0	0	0	5
hsa_retrop05624	0	1	1	5	2	0
hsa_retrom09484	0	0	0	1	0	0
hsa_retrop05628	9	3	1	5	3	3
hsa_retrom38526	0	0	0	2	0	0
hsa_retrom21350	0	0	3	0	0	1244
hsa_retrop13488	1	1	1	2	0	5
hsa_retrop10462	0	0	0	0	1	1
hsa_retrop25087	0	0	0	0	0	7
hsa_retrom16178	5	0	1	2	3	1241
hsa_retrom40820	0	0	0	0	0	0
hsa_retrom06155	24	0	3	4	1	13
hsa_retrom25486	0	0	0	0	0	0
hsa_retrom37838	0	0	0	0	0	0
hsa_retrop10668	18	0	0	0	0	7
hsa_retrop43278	1	0	0	1	0	6
hsa_retrop31913	0	0	0	0	0	2
hsa_retrom42256	1	1	0	1	0	0
hsa_retrom29760	0	0	0	0	0	0
hsa_retrop16115	0	0	0	0	0	2
hsairetrop37086	0	2	0	0	0	1
hsa_retrom26493	0	0	0	0	0	9
hsa_retrop42737	0	0	0	0	0	0
hsa_retrom22135	1	0	0	2	0	1
hsairetrop00852	0	0	0	0	0	0
hsa_retrom22137	0	0	0	0	0	0
hsa_retrom29832	0	0	0	0	0	0
hsa_retrop29556	0	0	0	0	0	0
hsa_retrom26498	7	0	2	0	0	5
hsa_retrom35240	5	4	2	0	0	1
hsa_retrop36749	0	4	1	1	1	1563
hsa_retrop31143	1	0	0	1	0	30
hsa_retrop35589	1	0	0	1	0	12
hsa_retrop12751	0	0	4	1	2	36
hsa_retrom06017	2	5	1	1	1	2
hsa_retrom26258	8	0	0	1	0	2
hsa_retrop43276	0	0	0	0	0	15
hsairetrom26813	5	1	0	0	0	0
hsa_retrop08859	0	0	0	0	0	3
hsa_retrom17170	1	0	3	5	4	0
hsa_retrop01907	17	1	3	7	3	4
hsa_retrom08841	1	1	0	0	1	1
hsa_retrom01821	1	1	0	0	2	22
hsa_retrom32068	4	1	0	0	1	297
hsa_retrop32916	11	0	0	5	2	247
hsa_retrop16218	5	3	3	8	19	9
hsa_retrop16219	8	2	1	4	2	21
hsa_retrom36234	0	0	0	0	0	0
hsa_retrom06331	0	0	0	0	0	2
hsa_retrop25085	8	0	17	7	5	4
hsa_retrop40433	0	3	0	0	2	3
hsa_retrom22624	0	0	0	0	0	7
hsa_retrom39761	7	1	5	0	1	5
hsa_retrop17064	0	0	0	0	0	8
hsa_retrom02320	0	0	0	0	0	0
hsa_retrop35292	6	1	4	0	0	8
hsa_retrop17068	1	0	0	1	0	8
hsairetrop21435	0	0	0	0	0	1
hsa_retrop32236	0	0	0	0	0	0
hsa_retrom07798	1	0	0	0	0	0
hsairetrop39481	0	0	0	0	0	12
hsa_retrop12685	488	325	435	1060	541	796
hsa_retrom28363	69	15	10	23	13	61
hsa_retrom30568	2	2	1	2	0	1
hsa_retrom04794	3	0	0	0	0	5
hsa_retrop37788	2	5	0	3	0	2
hsa_retrom32710	0	0	0	0	0	4
hsa_retrom04790	0	0	0	0	0	2
hsairetrom35592	1	0	0	0	0	0
hsa_retrom08206	5	0	0	0	1	0
hsa_retrop11086	47	3	3	2	1	205
hsa_retrom32249	2	0	1	1	1	4
hsa_retrom25677	6	1	1	3	4	8
hsa_retrop02584	1	6	5	0	1	4
hsa_retrom25675	21	1	4	5	1	25
hsa_retrop39301	2	0	0	0	0	5
hsa_retrom02929	0	0	0	0	3	0
hsa_retrom29909	1	0	4	0	6	7548
hsa_retrom15096	2211	682	794	6928	6603	821
hsa_retrom37834	0	0	0	0	0	0
hsairetrom02076	2	0	1	0	0	19
hsairetrop03653	0	0	0	0	0	0
hsa_retrom05020	0	1	0	1	0	0
hsa_retrop42499	0	0	0	0	0	0
hsa_retrom05023	0	0	0	0	0	3
hsa_retrop16508	2	0	6	0	2	9838
hsa_retrom16448	6	3	8	6	0	18
hsa_retrom01228	0	0	0	0	0	0
hsa_retrop42791	20	1	26	8	3	5
hsa_retrom37773	2	1	0	0	1	1
hsa_retrop16502	0	0	0	0	0	0
hsa_retrom01221	0	0	0	0	0	1
hsa_retrop05808	0	0	6	0	1	10
hsa_retrop01834	0	0	0	0	0	1
hsa_retrop25089	0	0	0	0	1	0
hsa_retrop41234	2	0	0	0	0	0
hsa_retrop01837	0	0	0	0	1	0
hsa_retrop17114	15	23	12	12	3	5
hsa_retrop17115	0	0	0	2	0	1
hsa_retrom39395	0	0	0	0	0	0
hsa_retrop25531	0	0	0	0	0	0
hsairetrom28524	0	0	1	1	0	0
hsa_retrop39461	0	0	0	0	0	0
hsa_retrop43570	1	0	0	1	1	0
hsa_retrop14735	0	0	0	1	0	1
hsa_retrom28984	50	13	7	9	28	48
hsa_retrom01001	1	0	0	4	2	3
hsa_retrom40785	0	1	0	1	0	0
hsa_retrop41140	1	0	0	1	0	0
hsa_retrop41414	11	0	1	1	0	10
hsa_retrom24417	6	0	1	3	3	6
hsa_retrop03749	4	0	0	1	4	0
hsa_retrom08515	0	0	0	0	0	1
hsa_retrom40533	2	0	0	0	1	1
hsa_retrop34866	15	1	2	0	0	2
hsa_retrom22312	0	0	0	0	0	2
hsa_retrom40461	0	0	0	0	0	2
hsa_retrom22317	0	0	0	0	0	1
hsa_retrom25783	1	1	3	1	0	5
hsa_retrop09927	0	0	0	0	0	0
hsa_retrop31526	0	0	0	0	2	2
hsa_retrom26478	3	0	6	21	2	6
hsairetrom23993	0	0	0	0	0	151
hsa_retrop09920	0	0	0	0	0	1
hsa_retrop09921	0	0	0	0	0	0
hsa_retrop24848	101	11	9	9	3	3
hsa_retrop03183	6	1	4	3	3	3
hsa_retrom26476	1	0	0	0	0	3
hsa_retrop03186	1	0	1	4	2	0
hsa_retrom26471	0	0	0	0	0	2
hsa_retrop09929	4	0	0	0	0	0
hsa_retrom25895	0	0	0	0	0	0
hsa_retrom01319	1	0	0	0	0	1
hsa_retrom41286	1	1	0	0	0	0
hsa_retrom25890	5	8	4	3	0	1
hsa_retrom33623	0	0	0	0	1	6
hsa_retrom33622	4	0	0	0	0	17
hsa_retrop06910	35	12	6	21	4	58
hsa_retrom24996	0	0	0	0	0	2
hsa_retrop42618	0	1	0	0	0	1824
hsa_retrom01642	14	5	0	11	1	0
hsa_retrom01315	18	0	10	9	16	67
hsa_retrop08190	0	0	0	0	0	3
hsa_retrop02787	114	37	59	58	62	65
hsa_retrom14807	8	0	0	0	0	0
hsa_retrom11306	0	0	0	0	0	0
hsa_retrom13850	0	0	1	0	1	1
hsa_retrom14803	0	0	0	0	0	4
hsa_retrop05113	3	2	3	3	21	95
hsa_retrop05116	0	0	0	0	0	7
hsa_retrom34394	0	0	0	0	0	0
hsa_retrop39247	3	0	1	1	0	4
hsairetrop05396	5	0	0	0	0	0
hsa_retrop12961	4	1	0	1	1	5
hsa_retrom04178	1	0	2	0	0	1
hsa_retrop12964	0	0	0	0	0	39
hsa_retrop39482	13	2	0	1	1	9
hsa_retrom10336	1	0	0	0	0	178
hsa_retrom25257	0	0	0	0	0	1
hsa_retrop09820	67	6	54	86	53	231
hsairetrop36593	2	0	0	0	0	1
hsa_retrom18694	6	0	1	2	1	2
hsa_retrop31264	0	0	0	1	1	0
hsa_retrom25520	2	0	0	0	0	1
hsa_retrop08663	0	0	0	0	0	37
hsa_retrom14738	47	13	22	18	4	59
hsa_retrop44390	0	0	0	0	0	0
hsa_retrop36719	0	1	1	2	0	3
hsa_retrom15607	3	1	0	3	2	1
hsairetrom01520	0	0	0	0	0	1
hsa_retrom14732	0	0	0	0	0	0
hsa_retrom43329	0	0	0	0	0	0
hsa_retrop08668	2	0	0	0	0	1
hsairetrom29468	0	0	0	1	0	5
hsa_retrom25093	1	0	0	0	0	5
hsa_retrop24247	35	9	90	18	33	576
hsa_retrom34710	3	0	0	0	0	18
hsa_retrom30999	1	0	0	0	0	2
hsa_retrop37309	22	2	9	6	2	58
hsa_retrom10255	1	1	0	0	0	1
hsa_retrop42492	0	0	0	0	0	0
hsa_retrop37080	0	0	0	0	0	0
hsa_retrop43181	284	27	6	24	0	301
hsa_retrop42491	1	0	0	0	0	9
hsa_retrop39800	0	0	0	0	0	10
hsa_retrom24787	9	0	1	2	0	5
hsa_retrom34576	6	1	0	0	0	0
hsa_retrop29920	8	1	0	1	0	0
hsairetrom37693	1	0	0	1	2	14
hsa_retrop08688	0	0	0	1	0	18
hsa_retrop16591	12	0	2	2	1	10
hsa_retrom30637	5	3	0	5	10	1
hsa_retrop08685	0	0	1	0	0	0
hsa_retrop08686	0	0	0	0	0	26
hsa_retrom26624	1	0	0	0	0	19
hsa_retrom04012	126	54	31	29	28	102
hsa_retrop32850	0	0	0	1	0	2
hsa_retrop01582	1	0	1	0	0	0
hsa_retrop39665	268	258	619	132	44	135
hsa_retrop14201	0	0	0	0	0	3
hsa_retrom14345	2	0	0	1	0	2
hsa_retrop11323	61	6	1	10	0	51
hsa_retrom37756	0	0	0	0	0	0
hsa_retrop29021	1	1	1	2	0	0
hsa_retrom04018	0	0	0	0	0	0
hsa_retrop00052	0	0	0	0	0	0
hsairetrop21989	0	0	0	0	0	3
hsa_retrom00065	1	1	1	0	0	1
hsa_retrom35690	0	1	1	0	0	2072
hsa_retrom16575	123	53	102	92	43	179
hsa_retrom15048	21	7	35	1	3	7
hsa_retrom43059	0	0	0	0	0	1
hsa_retrop09623	2	2	1	2	0	0
hsa_retrom14225	10	1	4	10	1	4
hsa_retrom40717	0	0	0	0	0	0
hsa_retrom10036	49	11	45	51	23	34
hsa_retrom28961	19	3	3	5	2	15
hsa_retrom37752	6	0	0	0	0	4
hsa_retrom41627	0	0	0	0	0	0
hsa_retrom30127	77	64	35	135	18	21
hsa_retrop03563	0	0	0	1	0	0
hsa_retrop41739	2	1	2	1	0	2
hsa_retrop01457	1	0	0	0	0	1
hsa_retrop03566	0	0	0	0	0	0
hsa_retrop42817	0	0	0	0	0	0
hsa_retrom40087	0	0	0	0	0	0
hsa_retrop42814	1	0	0	0	0	3
hsa_retrom40082	0	0	1	1	0	2
hsa_retrop14076	134	77	37	29	16	30
hsa_retrop16210	0	0	0	0	0	0
hsa_retrop27653	0	0	0	0	1	3
hsa_retrop32976	0	0	1	0	0	0
hsairetrom27283	0	0	0	0	0	0
hsa_retrom10745	0	0	0	0	0	4
hsa_retrop08531	2	0	2	0	1	5
hsa_retrom30705	0	0	0	0	0	124
hsa_retrop01633	0	1	1	1	0	1
hsa_retrop28231	0	0	2	2	0	1
hsa_retrop21189	3	3	0	1	2	8
hsa_retrop18858	3	1	0	0	2	1
hsa_retrom30700	4	0	4	4	3	5
hsa_retrom30251	1	2	2	2	2	0
hsa_retrom43052	3	0	0	0	0	7
hsa_retrom14185	49	7	1	31	2	4
hsairetrop18652	0	0	0	0	0	0
hsa_retrop15483	9	5	2	1	2	13
hsa_retrop25876	8	1	17	5	4	41
hsa_retrop25874	0	0	0	0	0	102
hsa_retrom11296	1	0	0	2	0	9
hsa_retrop01900	1	0	0	1	0	0
hsa_retrom11294	0	0	0	0	0	1
hsa_retrom35765	0	0	1	0	0	22
hsa_retrom04302	4	0	0	0	0	25
hsa_retrom38134	0	0	0	2	0	5
hsa_retrom38135	0	0	0	0	9	0
hsa_retrom16415	2	0	0	0	0	8
hsa_retrop05332	0	0	0	1	0	1
hsa_retrom16417	3	0	0	0	0	1
hsa_retrom00666	0	0	1	1	3	1
hsairetrom13203	2	1	2	2	0	2
hsa_retrop11436	1470	234	223	415	293	661
hsa_retrom11726	2	1	2	1	3	3
hsa_retrop41041	0	0	0	0	0	0
hsa_retrom29222	0	0	0	0	0	1
hsa_retrop05338	0	0	0	0	0	0
hsa_retrop24057	0	0	0	1	0	22
hsa_retrop41040	0	0	0	0	0	0
hsa_retrop02835	7	16	7	0	2	25
hsa_retrom35060	3	3	2	0	2	16
hsa_retrop24698	0	0	0	0	0	2
hsa_retrop38695	0	0	0	0	0	1
hsa_retrom31720	8	0	0	0	0	1
hsa_retrom10100	0	0	0	0	0	0
hsa_retrop37855	7	2	0	0	1	3
hsa_retrom05492	0	0	0	0	0	0
hsa_retrop42493	0	0	0	0	0	0
hsa_retrom31897	0	0	0	0	0	0
hsa_retrom10107	0	0	0	0	0	0
hsa_retrop28005	8	11	7	9	0	17
hsa_retrop26744	1	0	0	0	0	1
hsa_retrom30155	1	0	0	0	0	1
hsa_retrop38690	0	0	0	0	0	0
hsa_retrom00683	1	1	0	0	0	1
hsa_retrom39387	0	0	0	0	0	1
hsairetrom29883	0	0	0	0	0	1
hsa_retrom00680	2	0	0	0	0	7
hsa_retrop28347	0	0	1	0	0	0
hsa_retrom35412	0	0	0	0	0	4
hsa_retrom36366	0	0	0	0	0	0
hsa_retrop32526	1	0	0	1	0	1
hsa_retrom39715	0	0	0	0	0	0
hsa_retrom30410	1	0	0	0	0	0
hsa_retrop10698	0	0	1	1	1	0
hsa_retrom30415	0	1	0	5	0	3
hsa_retrom34977	2	0	1	4	1	3
hsa_retrop06597	1	0	3	0	2	2064
hsairetrop15867	0	3	0	0	2	4
hsa_retrop42022	1	0	0	0	0	2
hsa_retrom29594	0	0	0	0	0	0
hsa_retrom29595	0	0	0	0	0	1
hsa_retrom04941	0	3	0	0	0	0
hsa_retrop05245	0	0	2	1	0	0
hsa_retrom03263	2	1	3	3	2	4
hsa_retrom03265	1	1	0	0	0	1
hsairetrop09022	21	0	0	0	0	5
hsa_retrom16561	1	0	0	0	1	4
hsa_retrop42534	554	86	170	287	163	186
hsa_retrom28484	0	0	0	0	0	0
hsa_retrom36630	0	0	0	0	0	0
hsa_retrom29351	13	10	6	11	4	13
hsa_retrom29353	0	0	0	0	0	4
hsairetrop28362	0	0	1	0	0	0
hsa_retrom11346	0	0	0	0	0	0
hsa_retrop09553	1	0	2	0	0	0
hsa_retrop09550	3	0	0	0	0	0
hsa_retrom16349	2	1	0	0	0	11
hsa_retrom36825	10	3	0	0	0	128
hsa_retrop16041	0	0	0	0	0	1
hsa_retrop25253	10	1	8	4	3	5
hsa_retrom20049	0	0	0	0	0	1
hsa_retrom31273	0	0	0	0	0	8
hsa_retrop33036	1	0	0	0	0	3
hsa_retrop13569	22	8	7	2	3	8
hsa_retrom29571	0	2	0	0	1	0
hsa_retrop24646	0	0	0	0	0	0
hsa_retrop17277	1	0	0	0	0	5
hsa_retrop21769	3	0	0	0	0	1
hsairetrop35114	0	0	0	1	0	4
hsa_retrop10588	0	0	0	0	0	0
hsa_retrop28164	1	0	2	2	1	4
hsa_retrop30180	0	0	0	0	0	0
hsa_retrop17947	148	44	32	57	16	196
hsa_retrop10584	0	0	0	0	1	1
hsa_retrom35024	3	0	0	0	0	1
hsa_retrom35020	0	0	2	0	2	0
hsairetrop40884	0	0	0	0	0	2
hsa_retrop34750	2	2	2	3	0	3
hsa_retrom42398	0	0	0	0	0	0
hsa_retrop17471	12	0	0	0	0	7
hsa_retrom39382	0	0	0	0	0	0
hsairetrom32757	13	3	0	2	1	11
hsairetrop20350	3	0	0	2	0	5
hsa_retrom35593	1	0	0	1	0	0
hsa_retrop21162	72	30	23	6	1	717
hsa_retrop42616	0	0	0	0	0	0
hsairetrop02352	0	0	0	0	0	1
hsa_retrom03315	2	0	3	1	0	45
hsa_retrop03980	0	0	0	0	0	2
hsa_retrom00848	6	0	0	0	0	1
hsa_retrop03984	0	0	0	1	0	0
hsa_retrom29177	1	0	13	0	0	3
hsa_retrop11610	6	0	0	0	0	0
hsa_retrom16984	3	0	0	0	0	1
hsa_retrop11615	0	0	0	0	0	3
hsa_retrop38048	0	0	0	0	0	3
hsa_retrom03649	3	2	2	1	1	7
hsa_retrop31928	0	0	0	0	0	0
hsa_retrop36320	0	0	0	0	0	0
hsa_retrom34948	3	17	0	1	0	0
hsa_retrom26311	0	0	0	0	0	10
hsairetrom27753	2	0	1	0	1	3
hsa_retrom03354	2	1	0	0	1	9
hsairetrop02134	0	0	0	0	0	0
hsa_retrom34821	0	0	0	0	0	0
hsa_retrop38183	0	0	0	0	0	1
hsairetrop40087	0	0	0	0	0	1
hsa_retrom35956	0	0	0	4	0	8
hsa_retrom37994	0	0	0	0	0	0
hsairetrop40082	16	1	2	0	2	7
hsa_retrom25070	0	0	0	0	0	2
hsa_retrop16192	2	3	1	8	6	7
hsa_retrom36132	0	0	0	0	0	0
hsairetrop34851	0	0	0	0	0	0
hsa_retrop38665	2	0	0	0	0	2
hsa_retrop40731	2	0	0	1	0	0
hsa_retrop44475	1	0	0	0	0	0
hsa_retrop41240	11	0	2	2	0	9
hsa_retrop31902	0	0	1	0	0	0
hsa_retrom11548	4	1	0	2	2	3
hsa_retrom35699	0	0	0	0	0	0
hsa_retrop10475	20	2	3	6	3	47
hsa_retrom16187	0	0	0	0	0	0
hsa_retrom09672	0	1	1	0	0	4
hsa_retrop13810	1	6	5	8	4	7
hsa_retrop25091	0	0	1	0	0	1
hsa_retrom09677	8	0	2	0	0	0
hsa_retrop12567	3	1	1	3	3	4
hsa_retrom28318	0	0	0	0	0	0
hsa_retrop12562	8	4	1	5	3	11
hsa_retrop30141	227	37	155	127	71	1785
hsa_retrom09458	0	0	0	0	0	0
hsa_retrom09105	54	1	30	20	34	41
hsa_retrom31920	0	0	0	0	0	0
hsa_retrom40816	1	0	0	1	5	7
hsa_retrom28420	0	0	0	0	0	0
hsa_retrom31921	0	0	0	0	0	2
hsairetrom37144	1	3	3	2	0	3
hsa_retrom28424	0	0	0	1	0	6
hsa_retrom09109	0	1	2	0	1	9
hsa_retrom09456	3	5	4	2	2	29
hsa_retrop39744	0	0	0	0	0	0
hsa_retrop28093	6	1	2	0	0	4
hsa_retrop12744	1	0	0	0	1	0
hsa_retrop16929	2	0	2	0	0	1218
hsa_retrom42999	0	0	0	0	0	0
hsa_retrop12213	1	0	0	0	1	1
hsa_retrom37669	0	0	2	2	4	5
hsa_retrom17162	2	0	0	0	0	2
hsa_retrop37278	12	0	6	4	1	21
hsa_retrop32900	0	0	1	0	0	7
hsa_retrom11110	2	1	0	2	0	0
hsa_retrom43342	0	0	0	0	0	0
hsa_retrom08853	0	0	0	0	0	1
hsairetrom34978	0	0	0	0	0	0
hsa_retrom08856	0	0	0	3	0	4
hsa_retrom01814	2	2	6	1	1	3
hsa_retrop13589	1	0	0	0	0	5
hsa_retrom38065	0	0	0	0	0	0
hsa_retrop17055	5	0	2	1	0	1
hsa_retrom35092	11	0	0	0	0	3
hsa_retrom10429	3	0	3	6	0	6
hsa_retrom09587	0	0	0	0	0	1
hsa_retrop31646	19	11	8	3	1	9
hsa_retrom09585	0	0	0	2	1	0
hsairetrop10816	3	0	0	1	0	0
hsairetrop21408	0	0	0	0	0	1
hsairetrom11939	4	0	1	3	0	13
hsa_retrop24507	1	0	0	0	0	4
hsa_retrom34582	1	0	1	0	0	0
hsa_retrop40428	0	0	1	1	0	1
hsa_retrop17294	3	0	0	0	0	2
hsa_retrop12694	2	0	0	1	1	0
hsa_retrom09076	0	0	0	0	0	2
hsa_retrom09075	0	1	0	0	0	0
hsairetrop01530	1	0	0	0	0	1
hsa_retrop21883	1	0	0	1	1	1
hsa_retrom04781	1	0	10	7	0	216
hsa_retrom04786	0	0	0	0	0	0
hsa_retrop14590	7	2	1	2	0	10
hsa_retrop21885	0	0	0	0	0	0
hsairetrom28464	0	0	0	0	0	1
hsa_retrom26044	2	3	5	14	8	8
hsa_retrom29914	8	0	0	0	1	24
hsa_retrop03112	1	0	0	0	0	0
hsa_retrom08214	3	0	0	1	0	4
hsairetrom08378	0	1	2	2	0	8
hsa_retrom02918	0	0	0	3	0	0
hsa_retrop23951	1	0	1	0	0	0
hsa_retrom37817	0	1	0	0	0	0
hsa_retrom05019	0	0	1	6	4	3
hsa_retrop14752	3	0	0	0	0	16
hsairetrom09579	2	1	4	14	7	5
hsa_retrom37066	0	0	0	1	0	4
hsa_retrom05010	0	0	0	0	0	0
hsa_retrom05013	0	0	0	0	0	0
hsairetrop28971	0	0	0	1	0	69
hsa_retrop16538	0	0	0	0	0	0
hsa_retrom36819	2	0	0	3	3	1
hsa_retrom22499	1	0	0	2	1	2
hsa_retrom37265	3	0	0	1	0	5
hsa_retrop37458	32	2	0	0	0	18
hsa_retrop06857	0	0	0	1	0	16
hsa_retrom37262	0	0	0	0	0	0
hsa_retrop16537	1	0	0	0	0	2
hsa_retrop01802	0	0	0	0	0	0
hsa_retrop05816	0	0	0	0	0	0
hsa_retrom32654	0	0	0	0	2	1
hsa_retrom14043	11	0	3	3	2	2
hsa_retrom24884	0	2	1	0	0	1
hsa_retrop21972	7493	4505	8091	10326	6834	6767
hsa_retrop29323	0	0	2	0	0	0
hsa_retrom01495	2	1	1	5	0	4
hsa_retrop32583	0	0	0	1	0	6
hsa_retrop39869	1	0	2	1	0	8
hsa_retrom01490	3	3	4	3	0	5
hsa_retrom06218	3	1	0	1	0	1
hsairetrop32702	0	0	0	0	1	1
hsa_retrom24935	8	0	0	1	0	6
hsa_retrom41024	12	1	0	1	1	2
hsa_retrom01074	0	3	3	4	5	8
hsa_retrop31583	6	3	0	2	1	5
hsa_retrom28846	0	1	0	1	0	0
hsa_retrom07948	2	0	0	0	0	1
hsa_retrop31585	0	0	0	0	0	0
hsa_retrop33385	1	0	0	0	0	1
hsa_retrom40522	6	3	9	9	13	2
hsa_retrop40951	415	42	498	4523	5766	440
hsairetrop28962	0	0	0	0	0	1
hsa_retrom22303	9	0	0	1	0	3
hsa_retrop16458	6	3	2	4	6	18
hsa_retrom42567	0	0	0	0	0	1
hsa_retrop13977	5	1	0	0	0	3
hsa_retrom09857	6	1	5	7	0	3
hsa_retrom08508	0	0	4	0	0	8
hsa_retrop36999	0	0	0	0	0	0
hsa_retrop24872	0	0	0	0	0	0
hsa_retrop22051	1	0	0	0	0	1
hsa_retrop22050	0	0	1	0	0	961
hsa_retrom25793	1	0	0	0	0	13
hsa_retrop22055	2	1	7	1	0	1
hsa_retrom25795	1	0	6	1	3	2
hsa_retrom25798	0	0	0	0	0	3
hsa_retrom25799	0	0	0	0	0	10
hsa_retrom14120	1	0	22	0	0	0
hsa_retrop43428	0	0	0	0	0	0
hsa_retrop44036	0	0	0	0	0	1
hsa_retrom17344	1	0	0	0	0	0
hsa_retrop38712	24	4	5	14	17	83
hsa_retrom32658	9	5	2	0	1	4
hsa_retrom25882	11	3	2	4	2	5
hsa_retrop42608	0	0	1	0	0	416
hsa_retrop33366	0	0	0	0	0	1
hsa_retrop32769	1	0	0	0	1	0
hsa_retrop00468	2	0	6	3	0	1
hsa_retrop00469	5	1	14	4	0	42
hsa_retrom34365	1	0	0	0	0	13
hsa_retrop39904	0	2	1	1	1	0
hsa_retrom24685	36	21	8	10	3	66
hsa_retrom13826	113	48	16	7	8	112
hsa_retrom01109	0	0	0	0	0	3
hsa_retrop32014	1	1	0	2	0	1
hsa_retrom01106	3	1	3	3	0	5
hsa_retrom13828	1	0	1	0	0	183
hsa_retrop05104	8	1	3	20	254	107
hsa_retrop32011	6	2	2	0	0	14
hsa_retrom26515	0	1	0	3	2	3
hsa_retrom01100	1	0	1	2	0	0
hsa_retrop14183	0	0	0	0	0	0
hsa_retrop25534	107	22	17	23	16	73
hsa_retrop31295	0	0	0	0	0	0
hsa_retrop10875	0	0	0	1	1	13
hsa_retrom40893	0	0	1	0	0	81
hsa_retrop10873	0	0	1	0	1	44
hsa_retrop24914	0	0	0	0	0	0
hsa_retrom39846	0	0	0	0	0	0
hsa_retrom04160	0	0	0	0	0	0
hsa_retrom25241	0	0	0	0	0	0
hsa_retrom29816	2	0	2	31	2	0
hsa_retrop09835	2	0	0	0	0	4
hsa_retrom25244	2	0	0	0	1	1
hsa_retrop09837	1	0	0	0	1	6
hsa_retrop31458	0	0	0	1	0	0
hsa_retrom34769	0	0	0	0	0	0
hsa_retrom38470	0	2	2	2	1	2
hsa_retrom07896	0	0	0	0	0	0
hsa_retrop11059	18	6	7	5	2	22
hsairetrom28952	0	0	0	2	0	3
hsa_retrom29640	1	0	0	0	2	3
hsairetrom01249	0	0	0	2	0	2
hsa_retrop11053	5	1	2	2	2	10
hsa_retrom04761	0	0	0	1	0	2
hsa_retrom10241	1	0	1	0	0	22
hsa_retrop43205	0	0	0	0	0	0
hsa_retrom41435	9	2	1	5	1	0
hsa_retrom14232	0	0	1	0	0	0
hsa_retrom14230	7	7	1	1	1	1
hsa_retrop45031	0	0	0	0	0	0
hsa_retrop17118	0	0	0	0	0	0
hsa_retrom38474	0	0	0	0	0	0
hsa_retrop40926	0	0	0	1	0	0
hsa_retrom41384	81	24	29	38	18	19
hsa_retrom19159	3	0	0	0	0	1
hsa_retrom14904	1	1	1	2	1	2
hsa_retrop01021	4	0	1	0	1	0
hsa_retrop32981	0	0	1	0	0	1
hsa_retrop36711	0	0	0	0	0	1
hsa_retrom19154	222	130	126	95	10	209
hsa_retrom39356	233	45	22	86	16	91
hsairetrom32852	0	0	0	1	0	0
hsa_retrop36464	0	0	0	0	0	0
hsa_retrop39610	1	0	0	0	0	42
hsa_retrom31137	2	1	0	1	0	0
hsa_retrom19972	3	0	2	0	0	1
hsa_retrom29084	0	0	0	0	0	0
hsa_retrop14215	0	0	0	0	0	40
hsa_retrom00070	0	0	0	0	0	4
hsa_retrop11338	0	0	1	0	2	4
hsa_retrop43619	0	0	0	0	0	0
hsa_retrom00076	8	2	5	1	0	5
hsa_retrom35703	0	0	0	0	0	0
hsa_retrop04204	0	0	0	0	0	2
hsa_retrop21537	0	0	0	0	1	2
hsa_retrop09630	1	0	7	1	0	3
hsa_retrop09631	5	0	18	3	180	36
hsa_retrop36662	2	0	1	0	1	0
hsa_retrop04202	0	1	0	0	1	0
hsa_retrom16869	0	0	0	0	0	5
hsa_retrop08235	50	0	2	3	0	31
hsa_retrom05821	3	0	2	0	0	2
hsa_retrom28953	2	0	0	0	0	41
hsa_retrom35468	3	0	0	0	0	0
hsa_retrom10026	6	1	0	4	8	4
hsa_retrop15180	7	1	5	5	1	4
hsa_retrom32665	0	0	0	0	0	1
hsairetrom24724	0	0	1	0	0	0
hsairetrom24094	1	0	2	4	0	366
hsa_retrom30136	0	0	0	0	0	0
hsa_retrom41655	5	1	0	0	0	1
hsa_retrop43829	6716	1767	1991	2914	946	2091
hsa_retrop03796	0	0	0	0	0	0
hsa_retrom30139	0	0	0	0	0	5
hsa_retrom40096	0	0	0	0	0	0
hsa_retrop03792	4	3	2	5	3	12
hsa_retrom40094	0	0	259	0	0	7
hsa_retrop39739	1	2	0	0	0	1
hsa_retrop37735	0	0	0	0	0	0
hsa_retrop08542	2	3	3	1	3	2
hsa_retrom29918	1	0	1	0	0	0
hsa_retrop31358	0	0	0	0	0	1
hsairetrom40115	0	0	3	0	0	0
hsa_retrom31666	44	1	5	0	0	2
hsa_retrom39416	56	17	0	1	0	45
hsa_retrom30245	0	0	0	0	0	1
hsa_retrop43602	2	0	0	0	0	0
hsa_retrop28224	2	1	0	0	2	1
hsa_retrom39413	41	4	12	13	3	41
hsa_retrop28227	3	2	5	2	1	12
hsa_retrop01489	0	0	3	0	0	0
hsairetrom38481	0	0	0	0	0	1
hsa_retrop09498	297	12	12	15	22	56
hsa_retrop11429	0	1	1	0	1	0
hsa_retrop11426	16	14	19	11	12	34
hsa_retrop01480	1	0	0	0	1	1
hsa_retrom03411	0	0	0	0	1	54
hsa_retrop39724	4	5	1	2	1	7
hsa_retrop01485	0	0	0	0	0	1
hsa_retrop01484	0	0	0	4	0	4
hsa_retrop01487	0	0	0	0	0	53
hsa_retrom25809	0	0	0	0	0	0
hsa_retrom00672	2	0	9	1	0	1
hsa_retrop15987	50	15	13	6	6	13
hsa_retrop31355	0	0	0	1	0	4
hsa_retrom30782	1	3	0	0	0	1
hsa_retrom24827	0	0	0	0	0	0
hsa_retrom25864	0	0	0	0	1	0
hsa_retrop31352	0	0	0	0	0	0
hsa_retrom36649	0	0	0	0	0	0
hsa_retrom00679	4	3	1	3	1	4
hsa_retrop10632	1	0	0	2	1	6
hsa_retrop31353	0	1	1	2	1	3
hsa_retrom15476	3	5	0	1	1	0
hsa_retrop32274	0	0	0	0	0	236
hsa_retrom10112	0	1	0	1	0	0
hsa_retrop02827	0	0	0	0	0	0
hsa_retrom31713	0	0	0	0	0	0
hsa_retrop08301	1	0	0	0	0	0
hsa_retrom40921	0	0	0	0	0	163
hsa_retrop15293	0	0	0	0	0	2
hsa_retrom28934	1	1	1	5	4	0
hsa_retrop08306	2	0	0	0	623	0
hsa_retrom38396	2	0	0	3	0	26
hsa_retrom29253	7	1	0	1	0	6
hsa_retrom11570	1	0	0	0	0	1
hsa_retrop09303	1	0	1	0	1	4
hsa_retrop09300	0	0	1	0	0	1
hsa_retrom00694	0	0	1	0	0	5
hsa_retrop15966	6	1	6	3	0	13
hsa_retrop14060	0	0	0	0	2	1
hsa_retrom21434	5	1	2	1	1	56
hsa_retrom25557	0	0	0	7	3	858
hsa_retrom34970	0	0	1	0	0	3
hsa_retrom34984	0	0	0	0	0	0
hsa_retrom30400	2	1	0	1	0	3
hsa_retrop28353	0	0	0	0	1	2
hsa_retrom27377	0	0	0	0	0	2
hsa_retrom39703	0	0	0	0	0	0
hsa_retrom39860	0	0	0	0	0	0
hsairetrom03877	1	1	2	0	0	5
hsa_retrop25796	199	91	226	296	131	548
hsa_retrom39704	0	0	0	0	0	0
hsa_retrom39705	0	0	0	0	0	0
hsa_retrop31114	1	0	1	1	0	1
hsa_retrom03254	6	0	0	0	0	12
hsa_retrom25829	4	2	0	3	0	6
hsa_retrom35295	0	0	0	1	0	0
hsa_retrom04973	0	2	0	0	0	0
hsa_retrop36901	0	0	0	0	3	2
hsa_retrom35298	2	0	0	0	0	0
hsa_retrop30386	0	0	0	1	0	4
hsa_retrom06857	0	0	0	0	0	2
hsa_retrom03259	8	0	5	1	3	1
hsa_retrom04978	0	3	5	7	5	5
hsa_retrom04208	3	4	8	2	0	18
hsa_retrop18003	5	2	5	9	4	11
hsairetrom25965	0	0	0	0	0	1
hsa_retrop27669	68	1	11	5	1	17
hsa_retrop18006	7	2	1	4	1	11
hsa_retrop24460	0	0	1	1	0	0
hsa_retrom00218	3	0	0	0	0	1
hsa_retrop36486	1	0	6	2	5	19
hsa_retrom15984	0	0	0	0	0	0
hsa_retrom27067	0	3	1	2	0	2
hsairetrom05050	0	0	0	0	0	0
hsa_retrop13572	0	0	0	2	0	6
hsa_retrom42706	0	2	3	1	1	8
hsa_retrop27936	9	2	1	1	1	0
hsa_retrom31282	1	0	0	0	0	0
hsa_retrom04999	3	0	8	1	0	2
hsa_retrop16055	0	1	0	1	0	1
hsa_retrom20055	0	0	0	0	0	0
hsa_retrom26227	15	0	2	3	0	10
hsa_retrop21797	0	0	0	0	0	1
hsa_retrop40637	1	2	1	1	1	2
hsa_retrop28173	0	0	0	0	0	1
hsa_retrop28175	0	0	3	0	0	0
hsa_retrop38186	0	1	0	0	0	0
hsa_retrop29170	0	0	0	0	0	0
hsa_retrom28502	0	0	1	0	1	0
hsa_retrop17268	1	0	0	0	6	0
hsa_retrom38399	0	0	0	0	0	1
hsa_retrom35031	0	0	0	0	0	0
hsa_retrom30814	0	0	0	0	0	1
hsa_retrom07579	17	26	1	19	1	26
hsa_retrom30792	36	3	14	12	9	81
hsa_retrom28760	0	0	0	0	0	0
hsairetrom03903	0	0	0	1	0	0
hsa_retrom35589	1	1	0	0	0	2
hsa_retrop37878	38	6	11	11	13	38
hsa_retrom29145	0	0	0	0	0	24
hsa_retrom42383	1	1	0	0	0	0
hsa_retrop06673	1	0	0	0	0	13
hsa_retrop21156	114	113	80	93	84	61
hsa_retrom03320	4	0	5	10	1	6
hsa_retrom27307	2	1	0	0	0	4
hsa_retrop11602	3	3	0	0	0	5
hsa_retrom03636	4	2	3	10	6	2
hsa_retrop11600	0	0	0	0	0	0
hsa_retrop25310	4	13	4	0	2	1
hsa_retrom11065	2	0	4	4	0	2
hsa_retrom03639	20	0	1	0	0	21
hsa_retrom31914	1	1	0	0	2	0
hsa_retrom38989	0	0	0	0	0	1
hsa_retrom16992	1	0	0	0	0	1
hsa_retrom31707	0	0	0	0	1	11
hsa_retrom30070	0	0	0	0	0	0
hsa_retrom07532	0	1	0	0	0	0
hsa_retrom07533	13	11	9	13	7	1
hsa_retrom27477	0	0	0	0	0	0
hsa_retrom11066	0	1	0	1	3	6
hsairetrop31918	2	0	2	3	2	12
hsa_retrop25130	0	0	0	0	0	0
hsa_retrop13111	0	0	0	0	0	5
hsa_retrom42633	0	0	0	0	0	0
hsa_retrom10930	0	0	0	0	0	1
hsa_retrom37983	0	0	0	0	0	6
hsa_retrop13117	1	0	0	0	0	5
hsa_retrom41451	147	20	10	23	6	39
hsa_retrop05641	0	0	3	0	0	13
hsa_retrop03952	1	0	0	0	0	0
hsa_retrop05647	0	0	0	0	0	0
hsairetrom31678	0	0	0	0	0	3
hsa_retrom34627	1	0	0	0	0	1
hsa_retrom38425	3	2	4	6	2	5
hsairetrom12107	0	0	1	0	1	3
hsa_retrop37872	14	6	4	3	8	30
hsa_retrop43325	0	0	0	0	0	0
hsa_retrop34924	7	3	0	8	4	1
hsa_retrom41759	0	0	0	0	0	3
hsa_retrom26875	0	0	0	0	0	4
hsa_retrom36571	0	0	0	0	0	0
hsa_retrop05482	4	1	1	6	9	43
hsairetrop00729	7	3	1	6	1	15
hsa_retrom29786	0	0	0	0	0	0
hsa_retrop30533	1	0	1	1	0	0
hsa_retrop37806	0	0	0	0	0	0
hsa_retrom28304	72	11	23	16	4	25
hsa_retrop08318	1	1	2	2	0	27
hsa_retrom29780	0	0	0	0	0	4
hsa_retrom28308	20	0	0	1	0	39
hsa_retrop10640	1	0	14	1	0	7
hsa_retrop37876	0	0	1	1	0	4
hsairetrop26624	0	0	0	0	0	0
hsa_retrom34628	0	0	0	0	0	0
hsa_retrop12515	1	0	0	0	6	2
hsa_retrop10646	0	0	0	0	0	0
hsa_retrom09115	0	1	0	0	0	2
hsa_retrom28434	32	33	16	8	8	24
hsa_retrom28432	3	1	0	4	0	1
hsa_retrom09443	0	0	0	0	0	0
hsa_retrom26278	2	3	0	2	0	6
hsa_retrop43965	0	0	0	0	0	0
hsairetrom03121	7	3	22	6	2	15
hsa_retrop36262	0	0	0	0	0	0
hsa_retrom05314	0	0	0	1	0	0
hsa_retrop40095	1	1	0	0	0	0
hsa_retrom07622	0	0	0	0	0	0
hsa_retrom16282	16	2	7	4	6	16
hsairetrom06180	0	0	0	0	0	31
hsa_retrop04818	0	0	0	0	0	0
hsa_retrop16233	1	1	1	0	1	0
hsa_retrop12739	22	2	41	29	4	115
hsa_retrop12738	1	0	1	0	1	4
hsa_retrop16236	0	0	0	0	0	1
hsa_retrom17116	0	0	0	0	0	1
hsairetrop29641	0	0	0	0	0	1
hsa_retrop13603	0	0	0	0	0	0
hsa_retrom30621	0	0	0	1	1	11
hsa_retrom36218	0	1	0	0	0	0
hsa_retrop08831	6	0	0	0	0	2
hsa_retrom39064	0	0	0	0	1	1
hsa_retrop37193	0	0	0	0	0	0
hsa_retrop03315	0	0	1	0	0	650
hsa_retrop33195	3	1	2	1	0	2
hsa_retrom36211	10	0	6	10	10	7
hsairetrom16221	31	2	38	19	8	24
hsa_retrop08838	2	0	1	1	0	5
hsa_retrop17046	0	0	0	0	0	2
hsa_retrom09595	0	0	0	0	0	0
hsa_retrop16307	2	0	0	0	0	7
hsa_retrom14483	0	4	2	0	0	4
hsa_retrop44894	0	0	0	0	0	0
hsa_retrop08804	0	0	0	0	0	3
hsairetrop21410	1	4	0	0	0	1
hsa_retrom09060	0	0	0	0	0	0
hsa_retrop05793	0	0	1	0	0	0
hsairetrop01527	3	0	0	0	0	0
hsa_retrop17281	0	0	0	0	0	0
hsa_retrop30151	0	0	0	0	0	0
hsa_retrop05796	2	0	2	3	2	4
hsa_retrop21890	0	0	0	0	0	1
hsairetrom25152	0	1	0	0	0	0
hsa_retrom11642	0	0	0	4	0	0
hsa_retrop14586	10	6	0	0	0	1
hsa_retrop43794	1	0	0	0	1	0
hsa_retrom36148	139	27	34	43	18	113
hsa_retrop31666	0	0	3	0	2	4799
hsa_retrop41383	2	0	0	0	0	3
hsa_retrop32489	0	0	0	0	0	22
hsa_retrom08229	3	0	0	0	0	3
hsa_retrom29965	5	6	0	0	0	84
hsa_retrom08886	3	0	0	2	0	3
hsa_retrom04574	46	19	14	53	25	158
hsa_retrop44398	32	5	30	35	17	11
hsa_retrom32324	0	1	1	1	0	2
hsa_retrom29756	2	0	0	0	0	1
hsa_retrom04578	0	0	0	0	0	0
hsa_retrom17353	0	0	0	0	0	0
hsa_retrom02908	0	0	0	1	0	0
hsa_retrop44007	0	0	0	0	0	0
hsa_retrop06848	0	0	0	0	0	0
hsa_retrom37279	0	0	0	0	0	0
hsa_retrop33289	13	1	2	1	0	5
hsa_retrop08947	3	2	1	1	0	4
hsa_retrop03224	1	0	1	7	2	1
hsa_retrop01817	0	0	0	0	0	11
hsa_retrom24958	0	0	0	0	0	0
hsa_retrom06263	1	0	2	0	0	0
hsa_retrop17137	1	0	0	0	0	0
hsa_retrom06261	1	0	1	0	0	0
hsa_retrop32574	1	0	0	0	0	2
hsa_retrop32573	2	0	0	0	0	6
hsa_retrop05866	0	0	2	1	0	4
hsa_retrom01482	3	0	0	0	1	1
hsa_retrop32303	0	0	0	0	0	1
hsa_retrom32648	3	0	0	0	0	1
hsa_retrop44605	0	0	0	0	0	1
hsa_retrom32139	5	9	1	5	1	3
hsa_retrop17139	0	0	0	1	0	2
hsa_retrom08083	8	18	4	6	8	10
hsa_retrom01063	3	0	5	0	0	13
hsa_retrop44402	0	0	0	0	0	0
hsa_retrom24437	1	1	0	1	0	3
hsa_retrom08087	2	0	0	3	0	2
hsa_retrom01069	0	0	0	0	0	129
hsa_retrom07958	0	0	0	0	0	0
hsa_retrom30090	0	0	0	0	0	0
hsairetrom35482	0	0	1	0	0	0
hsa_retrom04684	0	0	0	0	1	14
hsa_retrom22372	0	0	0	0	1	3
hsa_retrop13909	1	1	1	0	0	3
hsa_retrop03761	10	5	24	3	0	3
hsa_retrom28239	0	0	0	0	0	1
hsa_retrop03764	4	2	3	1	1	14
hsa_retrom22374	0	0	0	1	1	0
hsa_retrom08539	5	0	4	1	5	1
hsa_retrom09843	5	11	1	3	1	2
hsa_retrop16421	0	0	0	0	1	0
hsa_retrom09846	1	0	0	0	0	0
hsa_retrop43561	3	0	1	1	3	2
hsa_retrop09941	3	3	0	1	3	3
hsa_retrop03166	1	1	0	0	2	8
hsa_retrop26032	0	0	0	0	0	0
hsa_retrom05170	0	2	1	1	0	2
hsa_retrop41451	0	0	0	0	0	1
hsa_retrom41732	2	2	2	0	0	1
hsa_retrom14133	0	0	1	0	1	356
hsairetrop31696	3	0	2	1	2	18
hsa_retrop26038	2	0	0	0	0	9
hsa_retrom01667	3	1	0	0	0	0
hsa_retrom28592	0	0	47	0	0	1
hsairetrop37208	538	168	211	229	90	432
hsa_retrop44052	1	0	0	0	1	0
hsa_retrom32737	0	0	0	0	0	26
hsa_retrop32719	1	0	0	0	0	0
hsairetrop17542	0	0	0	0	0	0
hsa_retrom38119	1	0	1	0	0	1
hsa_retrom13995	1	0	0	0	0	1
hsa_retrom39281	1391	545	325	382	133	558
hsa_retrom34985	1	0	0	1	0	0
hsa_retrom28898	0	0	0	0	0	1
hsa_retrop32028	20	0	12	3	2	10
hsa_retrop00322	1	1	0	0	0	6
hsa_retrop00320	4	0	2	1	0	1
hsa_retrom28890	0	0	0	0	0	0
hsa_retrom28891	0	0	0	0	0	0
hsa_retrop39269	2	1	3	3	1	72
hsa_retrom39091	0	0	0	0	0	0
hsa_retrop41660	0	0	0	0	0	0
hsa_retrom04197	1	0	2	4	3	0
hsa_retrop31285	3	1	4	3	1	7
hsa_retrop10801	0	0	0	0	0	0
hsa_retrop31280	19	4	13	5	10	1705
hsa_retrop09800	3	3	1	4	2	1
hsa_retrom41688	25	16	19	7	4	6
hsa_retrom22206	0	0	0	0	0	0
hsa_retrom15661	7	10	0	4	2	2
hsa_retrop39468	3	4	0	0	0	2
hsa_retrom22202	0	0	0	1	0	0
hsa_retrom07880	0	0	0	0	0	0
hsa_retrop37613	0	0	0	0	0	1
hsa_retrop14568	3	0	0	0	1	0
hsa_retrom03244	0	1	0	1	0	2
hsa_retrom07886	0	0	0	1	0	0
hsa_retrop18323	8	13	14	10	1	10
hsairetrom08384	1	0	0	0	0	7
hsa_retrop36716	23	12	5	7	1	1
hsa_retrom34772	0	0	0	1	0	0
hsa_retrop11047	0	0	0	0	0	1
hsa_retrop11040	0	1	0	0	0	0
hsa_retrop02789	6	10	3	1	4	0
hsa_retrom04756	1	1	0	0	0	0
hsa_retrom11245	132	109	88	221	95	50
hsa_retrom14594	0	0	0	0	0	27
hsa_retrop24906	3	0	2	5	2	6
hsa_retrom18761	45	0	45	2	0	31
hsa_retrop42487	0	0	0	0	0	0
hsa_retrop39860	0	0	0	0	0	0
hsa_retrop42701	0	0	0	0	0	3
hsa_retrop32622	0	0	1	0	1	69
hsa_retrom14599	1	0	2	0	2	1
hsa_retrom19146	15	4	2	1	0	10
hsa_retrom34511	1	2	0	0	0	2
hsa_retrop37801	6	9	0	0	1	4
hsairetrop13684	0	0	0	0	0	10
hsa_retrom38454	0	0	0	0	0	0
hsa_retrop34846	0	0	0	0	0	2
hsa_retrop01035	1	0	1	1	0	2
hsa_retrop20165	1	1	2	4	0	45
hsa_retrop21751	2	0	1	2	0	0
hsa_retrop39600	2	0	4	1	0	0
hsa_retrop36470	0	0	0	0	0	2
hsa_retrop05002	0	0	0	0	0	0
hsa_retrom41487	0	0	0	0	0	0
hsa_retrop10248	0	0	0	0	1	2
hsa_retrop39606	0	0	0	0	1	0
hsa_retrom15054	15	9	1	8	2	3
[truncated: 3,163 more rows]

## Sheet: Chimpanzee
# Supplemental Table S2: Retrocopy expression (≥1 unique read) in chimpanzee
# The number of unique reads refers to those mapped in all samples from the same organ
# The number of unique reads mapping on each retrocopy locus (as defined in Supplemental Table S1) was obtained using the CoverageBed function from the Bedtools suite.
retro_ID	Brain	Cerebellum	Heart	Kidney	Liver	Testis
ptriretrop19465	0	2	1	0	2	21
ptr_retrop01915	23	18	4	6	0	2
ptriretrop37468	3	0	0	0	0	0
ptr_retrom09800	5	1	5	1	0	0
ptriretrop30996	8	3	3	9	0	12
ptriretrom39341	15	32	2	29	2	0
ptr_retrop07360	0	0	0	0	0	1
ptr_retrop07362	50	14	14	71	13	19
ptr_retrop01912	13	4	1	5	2	12
ptriretrop08631	23	31	11	19	8	1
ptriretrom31573	0	0	0	0	1	0
ptr_retrop07366	0	10	0	302	90	0
ptr_retrop01626	0	0	0	0	0	0
ptriretrop40864	3	0	0	0	0	0
ptr_retrom03236	0	0	0	0	0	0
ptr_retrop10980	1	3	0	0	0	1
ptr_retrom08550	1	0	0	0	0	0
ptriretrop31167	0	0	0	0	0	1
ptr_retrom03232	0	0	0	0	0	0
ptriretrom35386	1	0	0	0	1	0
ptr_retrom06449	0	0	0	3	1	1
ptriretrop19869	3	0	0	4	0	1
ptr_retrop02918	4	7	1	1	0	11
ptr_retrom08798	0	0	0	0	0	2
ptriretrop25811	0	0	0	0	0	0
ptriretrom16798	3	1	2	2	5	0
ptr_retrop02910	1	0	0	0	0	0
ptr_retrom08790	2	0	1	0	0	0
ptr_retrop06815	0	0	0	0	0	0
ptr_retrom09606	1	0	0	1	0	0
ptriretrom39830	1	0	0	0	0	0
ptriretrom05472	1	0	0	0	0	0
ptr_retrop08777	0	0	0	0	0	0
ptriretrop30785	90	92	210	193	85	259
ptriretrom37345	0	0	0	0	0	0
ptr_retrop09659	16	10	11	1	2	0
ptriretrop09646	1	0	1	0	0	0
ptriretrom41358	1	0	1	1	1	0
ptriretrom30348	0	0	0	0	0	0
ptr_retrop06564	0	0	0	0	0	0
ptriretrom16778	0	0	0	0	0	1
ptriretrop18312	0	0	0	0	0	0
ptr_retrom02498	0	0	0	0	0	1
ptr_retrom02499	0	0	0	3	0	0
ptr_retrom02494	6	0	0	3	0	0
ptr_retrom02495	5	2	0	5	0	1
ptr_retrom02038	0	0	0	0	0	0
ptr_retrom02942	9	9	3	11	3	7
ptr_retrom02944	14	2	3	2	2	0
ptr_retrop01598	74	20	6	21	0	26
ptr_retrom03520	902	320	319	587	1342	93
ptr_retrop07214	0	0	0	0	0	0
ptr_retrom07322	0	0	2	0	1	0
ptr_retrop01597	1	0	1	2	0	5
ptr_retrom07327	1	1	1	0	0	0
ptr_retrop08481	0	0	0	0	0	2
ptr_retrop01593	0	0	0	0	0	0
ptr_retrom06307	2	4	1	0	4	1
ptr_retrom04176	5	3	3	1	3	2
ptr_retrom09803	0	0	0	0	0	114
ptriretrop08706	2	4	0	0	0	1
ptr_retrom01945	0	1	0	0	0	0
ptr_retrop03735	0	0	0	0	0	0
ptr_retrom03302	0	0	0	0	0	0
ptr_retrom08425	2	0	0	1	0	0
ptr_retrom08427	0	0	0	0	0	0
ptr_retrom03524	212	149	180	133	77	9
ptr_retrom07411	6	6	1	20	11	170
ptriretrop23203	5	7	0	5	0	5
ptr_retrop07363	20	5	0	42	5	0
ptriretrop06385	6	3	0	6	0	2
ptr_retrom05830	0	0	0	0	0	0
ptriretrom07431	0	0	1	1	0	788
ptriretrom21868	1	0	0	3	0	0
ptr_retrom01784	0	0	0	0	0	0
ptriretrom22840	2	1	0	1	1	1
ptr_retrop06799	72	1	0	0	0	0
ptr_retrom09181	0	0	0	0	0	1
ptriretrom08070	20	5	4	6	6	5
ptriretrom13697	0	0	0	0	0	0
ptr_retrom07779	0	0	1	1	2	1
ptr_retrop06663	7	0	1	5	1	1
ptriretrop35089	6	5	0	6	0	2
ptr_retrop09896	0	0	1	0	0	0
ptr_retrop07368	8	1	0	2	6	1
ptr_retrop09897	1	1	0	0	0	0
ptriretrom34716	1169	404	1293	2219	1635	63
ptriretrop27713	1	0	0	0	0	0
ptr_retrom03049	14	7	2	0	0	0
ptr_retrop08466	8	1	0	0	0	0
ptr_retrop08467	156	109	13	7	1	7
ptr_retrop08463	0	0	0	0	0	212
ptr_retrom09593	0	1	1	1	0	0
ptriretrom25479	0	0	0	1	1	0
ptr_retrom07036	0	0	0	0	1	0
ptriretrom02901	1	1	0	0	2	1
ptr_retrom07033	254	120	58	88	27	26
ptriretrop08143	0	0	0	0	0	0
ptriretrop08417	0	0	0	0	0	0
ptr_retrop09893	2	2	0	0	0	0
ptr_retrom02540	1	0	0	0	0	0
ptriretrom10187	0	0	0	0	0	0
ptr_retrom08499	2	1	0	0	0	0
ptr_retrop08667	1	0	0	0	0	0
ptr_retrom11048	1	0	0	1	0	0
ptriretrom20134	3	1	1	0	0	7
ptr_retrom08553	0	0	0	0	0	0
ptr_retrop08842	0	0	0	0	0	0
ptr_retrom11043	2	2	12	46	0	7
ptr_retrop01714	0	0	0	0	0	0
ptr_retrop09957	8	7	7	17	2	2
ptr_retrom11047	0	2	0	0	0	0
ptr_retrom11046	0	0	0	0	0	0
ptr_retrop04189	4	0	0	0	0	2
ptr_retrop04188	4	2	0	0	0	0
ptr_retrop02562	1	1	0	0	0	1
ptriretrop08896	0	0	0	0	0	1
ptr_retrom09026	1	0	0	0	0	0
ptr_retrop04182	0	0	0	0	0	0
ptr_retrop04184	0	0	0	1	0	0
ptr_retrop04187	0	0	0	0	0	0
ptriretrop40671	1	1	0	3	1	3
ptriretrom24120	2	3	3	3	0	0
ptriretrop04431	0	0	0	0	0	0
ptriretrom27309	0	0	0	0	0	0
ptr_retrom06892	1	0	0	0	0	0
ptr_retrom09807	1	0	0	2	1	0
ptr_retrop08795	12	3	0	1	0	2
ptriretrom24328	2	0	0	0	0	0
ptr_retrop05321	9	2	7	3	0	0
ptr_retrop05326	0	0	0	1	1	1
ptr_retrop05327	2	2	1	2	1	16
ptr_retrom06320	9	7	0	14	4	5
ptriretrop14319	4	0	0	0	0	0
ptr_retrop05329	0	0	0	0	0	0
ptr_retrom07673	3	1	0	0	0	0
ptriretrop04313	199	137	337	236	163	656
ptriretrop22891	0	1	0	0	0	7
ptriretrop42494	0	0	0	0	0	0
ptr_retrom06978	0	0	0	0	2	0
ptriretrom17428	0	0	0	0	0	0
ptriretrop23381	1	0	0	0	0	0
ptr_retrom01591	0	0	0	0	0	0
ptriretrop22204	367	219	212	282	139	154
ptriretrop28370	2	4	1	2	1	15
ptr_retrop05699	0	0	0	0	0	0
ptr_retrop04985	3	3	6	4	3	0
ptr_retrop04984	7	6	2	3	1	0
ptriretrom24572	2	0	0	2	0	1
ptr_retrop05690	1	0	0	0	1	0
ptr_retrop05691	0	0	0	0	0	0
ptr_retrop05696	0	0	0	0	0	0
ptriretrop28257	0	0	0	0	0	0
ptr_retrom01165	0	0	0	0	0	1
ptr_retrop05695	3	5	0	2	0	0
ptriretrom05869	0	0	0	0	0	1
ptr_retrom02159	8991	10220	2828	16509	9536	1652
ptr_retrop05901	1422	956	1301	1798	920	322
ptr_retrom06740	1	0	0	0	0	1
ptriretrom07968	53	69	48	102	113	72
ptr_retrom08523	1	0	0	1	0	0
ptr_retrom02151	0	0	0	0	0	0
ptriretrop39806	0	0	0	0	0	0
ptriretrop32324	0	0	0	0	0	0
ptriretrop15361	233	145	218	237	257	88
ptriretrom23602	0	1	0	0	0	0
ptr_retrom02799	0	0	0	0	0	0
ptriretrom42247	2	0	0	2	2	0
ptriretrom11699	125	120	172	238	263	23
ptr_retrom02794	0	0	0	0	0	7
ptr_retrop05214	4	3	2	3	1	3
ptriretrop05275	1	0	0	2	0	1
ptriretrom11693	0	0	0	0	0	0
ptr_retrom10956	884	456	206	305	117	142
ptriretrop11847	2	2	1	2	2	0
ptr_retrop08862	1	0	0	0	1	0
ptr_retrop08863	4	1	5	3	0	1
ptr_retrom06741	1	1	0	1	0	0
ptr_retrom06660	7	16	0	0	0	0
ptriretrom30565	0	0	0	0	0	1
ptriretrom34880	3	0	0	0	0	0
ptriretrom11325	0	0	0	0	0	1
ptriretrom23490	1	0	5	1	20	1
ptriretrop22963	0	0	1	1	0	278
ptr_retrop05077	1	0	3	0	0	2
ptriretrop22637	0	0	0	0	0	12
ptr_retrom09211	5	1	0	2	1	1
ptr_retrom09213	40	16	10	93	16	9
ptriretrop42258	1	0	0	0	0	0
ptriretrom29985	0	0	0	0	0	0
ptriretrop28153	0	0	0	0	0	0
ptriretrop09761	66	65	28	126	57	3
ptr_retrop05583	17	4	2	10	5	1
ptr_retrop08884	0	0	0	0	0	0
ptr_retrop11371	0	0	0	0	0	0
ptr_retrop08887	5	4	5	0	0	0
ptr_retrom04334	3	2	0	1	2	0
ptr_retrop11377	0	0	0	0	0	0
ptriretrop14165	1	0	0	0	0	0
ptr_retrop10132	0	0	0	1	0	1
ptr_retrom05071	3	8	3	6	2	0
ptriretrop41103	0	1	3	1	0	3
ptriretrop37329	7	2	0	3	3	3
ptriretrom30486	0	0	0	0	0	0
ptr_retrom09961	0	0	1	1	0	7
ptr_retrom05079	4	1	2	0	1	0
ptriretrop32874	1	3	1	0	0	2
ptr_retrom09162	1	0	0	2	2	0
ptr_retrom06781	2	0	0	1	0	4
ptriretrop30572	0	1	0	1	0	0
ptr_retrom05676	0	0	0	0	0	0
ptr_retrom05673	0	1	0	0	0	2
ptr_retrom05672	6	0	1	1	2	6
ptr_retrom05670	0	0	0	0	0	0
ptriretrom14088	0	2	0	1	0	0
ptr_retrop09680	12	1	4	3	0	1
ptr_retrop05452	0	0	0	0	0	0
ptr_retrop05453	0	0	0	0	0	0
ptr_retrop09685	0	2	3	6	0	5647
ptr_retrop05456	0	5	1	0	0	3
ptriretrom08879	3	1	0	0	0	7
ptr_retrop08758	1	0	0	0	0	0
ptr_retrop02451	2	1	2	4	1	1
ptriretrop42255	0	0	0	0	0	2
ptr_retrop01630	0	0	0	1	1	1
ptr_retrop02457	0	0	0	0	0	1
ptr_retrop09616	3	2	0	0	0	0
ptr_retrom09363	0	0	0	6	4	0
ptriretrop13521	0	0	0	0	1	0
ptr_retrop03865	1	3	0	0	0	0
ptr_retrop09617	0	0	1	0	0	2
ptr_retrop10512	0	3	0	1	3	0
ptriretrop28006	3	0	0	2	0	4
ptriretrop38999	3	0	2	3	0	0
ptr_retrop11572	56	85	11	41	10	15
ptr_retrop11396	0	1	2	0	0	7
ptr_retrop11570	1	0	0	0	0	2
ptr_retrop06809	0	2	1	1	0	0
ptriretrop42224	0	0	0	0	0	0
ptriretrop22593	2	1	0	0	0	0
ptr_retrop03855	4289	1796	1678	3064	1727	38
ptr_retrop02583	0	0	0	0	0	0
ptriretrom15208	9	8	6	16	4	1
ptriretrom26766	0	0	7	4	0	24
ptr_retrom10247	0	0	0	0	0	0
ptr_retrom10240	2	0	1	0	0	0
ptr_retrom04415	0	0	0	0	0	0
ptr_retrom10242	0	0	0	0	0	0
ptr_retrom04417	0	0	0	0	0	2
ptriretrop14094	3	1	0	3	0	2
ptr_retrom06672	2	0	0	1	2	0
ptriretrop07980	31	29	4	7	2	5
ptr_retrom06670	3	3	2	3	8	1
ptriretrop24128	1	0	0	0	0	0
ptriretrom27262	0	0	0	0	0	0
ptriretrom30343	0	0	0	0	0	4
ptr_retrop02075	17	31	8	15	10	7
ptr_retrop02074	1	1	3	3	0	1
ptr_retrom06922	2	0	0	1	0	1
ptr_retrom06923	0	0	0	2	0	0
ptriretrom36810	0	0	0	0	0	0
ptr_retrom08766	0	0	0	0	0	0
ptr_retrom08767	0	0	0	0	0	0
ptr_retrom08940	0	0	3	4	2	1
ptr_retrom06925	0	0	0	0	0	0
ptr_retrop03210	0	0	0	2	0	2
ptr_retrom06928	0	0	0	0	0	0
ptr_retrop03943	0	0	0	0	0	1
ptr_retrom09140	1	0	0	1	4	1
ptr_retrom08948	3	0	1	2	1	1
ptriretrop43072	8	10	3	0	2	2
ptriretrop32686	15	25	3	15	9	64
ptriretrop12004	0	0	0	0	0	0
ptriretrom09438	0	0	0	1	0	3
ptriretrom23375	5	9	1	2	0	0
ptr_retrop09910	40	21	2	3	1	99
ptr_retrop09913	2	1	0	1	1	6
ptriretrop22559	1	0	0	0	0	0
ptr_retrom08898	0	0	0	0	102	1
ptriretrom26273	0	0	0	0	0	0
ptriretrom33508	7	7	0	4	0	4
ptriretrop13232	0	1	0	0	1	1
ptriretrop39013	1	1	0	3	0	0
ptr_retrom08890	3	7	1	0	1	3
ptr_retrop02147	0	0	0	0	0	0
ptriretrom38759	259	277	203	373	144	75
ptr_retrop08874	0	0	0	0	0	0
ptr_retrom08895	7	4	2	27	6	0
ptriretrom36024	0	0	0	0	0	0
ptriretrom09483	105	153	32	155	10	13
ptr_retrom04305	1	3	3	1	0	0
ptr_retrom04306	0	0	0	1	0	1
ptr_retrom04307	0	0	1	3	0	2
ptr_retrom04300	0	1	1	0	1	0
ptr_retrop06797	0	0	0	0	0	0
ptr_retrop06794	4	0	1	4	1	0
ptr_retrom05526	0	0	0	0	0	0
ptr_retrom05256	6	19	3	3	0	4
ptr_retrop09803	0	0	0	0	1	4
ptr_retrom05521	14	27	5	38	14	29
ptr_retrom02805	1	0	0	0	0	0
ptr_retrop07647	0	19	0	3	0	0
ptr_retrom02806	2	0	1	2	1	1
ptr_retrom02801	2	0	0	0	0	0
ptriretrom33178	109	70	65	70	49	21
ptr_retrom02802	0	1	0	4	4	0
ptr_retrop06572	0	0	0	1	0	4
ptriretrom34088	0	0	0	0	0	1
ptr_retrom06815	1	1	1	0	0	0
ptr_retrom04120	13	4	3	6	6	0
ptr_retrop06577	1	0	0	0	0	0
ptr_retrom04123	0	0	0	0	0	1
ptr_retrom03820	3	5	1	4	0	1
ptr_retrop01595	2	0	4	1	4	0
ptriretrom13847	7	3	4	7	6	3
ptr_retrop07680	0	0	0	19	0	0
ptriretrom40319	0	0	0	0	0	0
ptr_retrom09782	1	3	0	1	0	0
ptr_retrom03826	0	0	0	0	0	0
ptr_retrop07684	0	0	0	0	0	0
ptriretrom40314	8	5	0	3	1	0
ptr_retrom06907	0	1	0	0	0	0
ptr_retrom09789	3	0	0	0	0	0
ptriretrop35247	1	0	1	0	1	0
ptr_retrom10098	110	52	23	12	53	0
ptr_retrom09540	0	0	0	0	0	0
ptr_retrom09543	0	0	0	1	0	0
ptr_retrom09545	0	0	1	0	0	5
ptr_retrom10090	2	1	0	0	3	0
ptr_retrom04168	0	0	0	0	0	0
ptriretrom13944	0	0	0	0	0	0
ptr_retrop10225	1	0	0	0	0	18
ptr_retrop10227	198	121	218	639	352	73
ptr_retrop06489	0	1	0	6	0	4
ptr_retrop03180	2	1	4	1	0	0
ptriretrom37194	0	0	0	0	0	0
ptr_retrop03182	0	0	0	1	1	0
ptr_retrop01592	2	2	0	0	0	0
ptriretrop26368	3	6	1	0	0	0
ptr_retrop06483	0	1	0	0	0	1
ptr_retrop06480	323	128	116	346	274	106
ptriretrom15066	1	0	0	0	0	0
ptriretrom35444	8	2	2	5	1	0
ptriretrop38694	1	0	0	1	1	20
ptriretrom37574	12	0	4	2	0	2
ptr_retrop07427	0	0	0	0	0	0
ptriretrom39332	4	9	0	8	0	1
ptr_retrop08627	0	0	0	0	0	4
ptriretrop39745	0	0	0	2	0	0
ptr_retrop07350	0	0	0	0	0	5
ptriretrom22693	0	0	0	0	0	0
ptr_retrom08548	4	1	7	5	0	0
ptr_retrom08971	1	0	0	0	0	0
ptriretrop05096	806	603	1047	1796	1527	424
ptriretrop06465	12	12	7	41	9	6
ptr_retrom08543	0	0	0	0	0	0
ptr_retrom08540	1	1	0	0	0	0
ptr_retrom07584	13	3	1	6	2	0
ptr_retrop09942	42	20	31	23	4	57
ptriretrom21254	0	0	0	0	0	8
ptriretrom21525	0	0	0	1	2	4
ptr_retrom07250	0	0	0	0	0	0
ptr_retrom07257	3	0	0	0	1	0
ptriretrom26202	3086	2538	1704	1695	839	459
ptr_retrom08885	8	6	6	5	2	1
ptriretrop39346	0	2	1	1	0	0
ptr_retrop02893	0	0	0	0	0	0
ptriretrom33051	5	4	0	7	1	0
ptriretrop38760	0	0	1	0	0	0
ptriretrom39804	0	0	0	0	0	0
ptr_retrom09813	0	0	0	0	0	0
ptr_retrom09112	1	1	1	0	0	0
ptriretrop32663	0	1	0	0	0	0
ptriretrom17691	1	0	0	2	0	0
ptriretrop18300	0	0	1	0	0	0
ptriretrop19258	0	0	0	0	0	0
ptriretrop19250	0	0	0	0	0	0
ptr_retrom08430	0	0	0	0	0	0
ptr_retrop07229	0	0	0	0	0	0
ptriretrom25089	0	0	0	0	0	0
ptr_retrop07221	0	0	0	0	0	0
ptr_retrop07220	50	1	10	7	5	4
ptr_retrom08426	0	0	0	0	1	5
ptriretrop22154	0	0	0	0	0	0
ptr_retrom06453	1	2	1	3	0	0
ptr_retrom03316	0	0	0	0	0	0
ptr_retrom08435	1	0	0	0	1	2
ptr_retrom03312	0	0	0	0	1	0
ptr_retrop03729	6	0	0	3	1	0
ptr_retrom03310	2	0	0	0	0	4
ptr_retrom03311	19	27	5	2	2	6
ptr_retrop03724	2	0	0	0	0	0
ptr_retrom01951	35	36	21	26	4	7
ptriretrom34060	1	1	0	0	0	3
ptr_retrop06603	2	2	6	4	2	2
ptr_retrop03723	0	0	4	6	1	0
ptriretrom17764	1	1	0	3	3	0
ptr_retrom00950	0	0	0	0	0	0
ptriretrop06392	11	10	9	12	6	1
ptriretrop30688	0	0	0	0	0	0
ptr_retrom09503	25	8	4	20	9	1
ptr_retrop01908	0	1	0	0	0	1
ptriretrom21329	0	0	0	0	0	0
ptriretrom28320	2	1	0	2	1	0
ptr_retrop01905	815	316	185	1650	358	26
ptr_retrop08907	0	0	4	0	1	1
ptriretrop18416	3	2	1	2	5	0
ptriretrom32632	0	0	0	0	0	0
ptr_retrop11545	8	3	0	2	0	0
ptriretrop38234	15	24	3	15	3	12
ptr_retrop08906	0	0	0	0	0	0
ptriretrop30524	0	0	0	0	0	0
ptr_retrop08647	2	1	0	3	0	0
ptriretrop08089	0	0	0	0	0	0
ptriretrop31815	5	9	3	23	5	3
ptr_retrop06619	0	0	0	0	0	0
ptriretrop27700	0	2	5	3	2	40
ptr_retrom03038	3	1	2	0	0	1
ptr_retrop01762	0	0	0	0	0	0
ptr_retrop01763	0	0	0	0	0	0
ptr_retrop01761	0	0	0	0	0	0
ptr_retrom03033	0	0	0	0	0	1
ptr_retrom03032	3	0	0	4	0	0
ptr_retrom03031	0	0	0	0	0	0
ptr_retrop05871	2	0	2	0	0	10
ptriretrop10420	0	0	0	0	0	0
ptriretrom18529	0	0	2	0	0	1
ptr_retrom03034	0	0	0	0	0	0
ptriretrop07733	0	0	0	0	0	0
ptriretrop37639	2	0	0	0	0	0
ptr_retrom01801	0	0	0	0	0	0
ptriretrop26091	1	0	0	0	0	0
ptr_retrom07029	1	3	0	0	0	0
ptriretrom40494	0	0	0	0	0	0
ptriretrom24134	302	237	74	693	94	129
ptr_retrom08608	1	0	1	1	0	0
ptr_retrop10493	0	0	0	0	0	0
ptr_retrom11054	2	0	0	0	0	1
ptriretrom16583	0	1	0	0	0	0
ptriretrop19811	83	27	67	132	191	44
ptr_retrom10509	3	0	0	3	0	1
ptriretrom20691	0	0	0	0	1	0
ptr_retrom10507	15	3	2	8	4	0
ptr_retrop06907	0	0	0	0	0	0
ptr_retrop04197	0	0	0	0	0	0
ptr_retrop07093	0	0	0	0	0	0
ptr_retrop04195	3	2	2	0	0	0
ptr_retrop04192	0	1	0	0	0	0
ptriretrom36689	0	1	2	4	2	2
ptriretrom11594	314	542	216	990	886	21
ptriretrom27816	0	0	0	0	0	0
ptr_retrop06916	4	1	0	24	5	0
ptr_retrop04198	1	0	0	0	0	1
ptriretrom25623	0	0	0	0	0	0
ptr_retrom03785	2	4	4	5	5	2
ptriretrop22469	0	0	0	0	0	2
ptr_retrom03787	0	0	1	0	0	0
ptr_retrop06000	3	0	0	1	0	17
ptr_retrom03781	2	0	1	2	0	6
ptr_retrom03780	8	3	1	3	6	1
ptriretrop20958	0	0	0	0	1	1
ptr_retrop08380	1	0	0	0	0	1
ptriretrom31117	2	0	5	3	2	1
ptriretrop22172	17	17	1	7	0	1
ptr_retrop08527	0	0	0	0	0	0
ptr_retrop08526	0	0	0	0	0	4
ptr_retrom06317	8	8	6	2	2	2
ptriretrom18630	0	0	0	7	0	0
ptriretrom24969	0	0	1	2	0	0
ptr_retrom11134	1	0	1	1	0	0
ptriretrop37743	0	0	0	51	0	0
ptr_retrom08908	58	37	40	34	12	12
ptr_retrop08529	0	0	0	1	1	0
ptr_retrom08539	0	0	0	0	0	0
ptriretrop12786	10	2	1	2	0	0
ptr_retrop04539	0	0	0	3	3	0
ptriretrom32510	1	0	2	0	0	2
ptriretrom40781	0	0	0	0	0	0
ptriretrom10422	0	0	0	0	0	0
ptr_retrom07044	8	5	2	3	0	0
ptriretrom05367	0	0	0	0	0	0
ptriretrom35644	1	1	3	2	0	1
ptr_retrop04535	8	14	1	51	61	3
ptriretrom22595	0	0	0	1	0	0
ptr_retrop05665	5	13	0	1	0	0
ptr_retrop05916	4	3	0	8	0	10
ptr_retrop05663	6	14	3	7	8	2
ptriretrop05260	0	0	0	0	0	0
ptr_retrop05661	0	0	0	0	0	0
ptr_retrom09586	2	0	0	0	0	0
ptr_retrop06918	0	0	0	0	0	0
ptr_retrop07635	1	2	1	1	0	5
ptr_retrom09947	21	4	2	15	3	6
ptriretrop30962	2	0	0	0	0	0
ptriretrop09282	2	0	0	1	0	1
ptriretrop41627	368	204	75	81	176	44
ptriretrop15414	303	206	342	4651	5763	22
ptr_retrom02141	2	0	0	0	0	0
ptriretrom42253	2	1	0	0	0	0
ptriretrom35332	0	0	2	1	0	1
ptr_retrop02973	1	0	1	3	1	24
ptr_retrom02788	3	1	1	0	0	0
ptr_retrom11175	0	1	0	0	0	0
ptriretrop11300	24	0	21	44	1	0
ptr_retrop05262	0	0	0	0	0	1
ptriretrop14236	4	3	2	2	1	0
ptr_retrop05260	0	0	0	0	0	0
ptr_retrop05266	0	0	0	0	0	1
ptr_retrop05265	0	0	0	0	0	0
ptr_retrop05264	1	1	0	1	0	0
ptr_retrop06579	2	0	2	0	1	0
ptriretrom05446	0	0	0	0	0	0
ptriretrom06001	0	0	0	0	0	0
ptriretrom40879	6	5	0	0	0	0
ptriretrom23480	0	0	0	0	0	0
ptriretrop05460	0	0	0	0	0	8
ptr_retrop05003	1	0	0	0	0	2
ptr_retrop05002	2	1	1	2	0	0
ptr_retrop07661	6	1	0	2	0	1
ptr_retrom05793	1	0	1	0	0	0
ptr_retrom05794	0	0	0	0	0	3
ptr_retrop05005	1	0	0	0	0	0
ptr_retrom05799	4	4	2	12	1	1
ptr_retrom09209	1	4	4	7	7	0
ptr_retrom06445	0	1	3	1	0	0
ptr_retrop07461	4	1	5	3	2	6
ptr_retrop07460	322	287	167	593	223	107
ptriretrop05607	1	0	0	0	0	18
ptr_retrom06984	0	0	0	0	0	0
ptriretrop36203	0	0	1	4	1	2
ptriretrop21843	137	117	84	198	43	6
ptr_retrop01778	3	0	1	2	0	1
ptr_retrop09505	3	1	0	2	0	0
ptr_retrom09150	0	0	0	0	0	0
ptr_retrop11470	3	3	0	3	0	0
ptr_retrom06125	687	141	189	1390	875	37
ptr_retrom06113	4	0	0	3	0	0
ptriretrop14152	0	0	0	0	0	0
ptriretrop39906	540	487	307	546	373	178
ptr_retrop06731	0	1	0	0	0	0
ptriretrom09821	29	9	21	27	19	4
ptriretrop41139	0	0	0	0	0	1
ptr_retrom09971	5	2	1	2	0	1
ptr_retrom05068	1	0	0	2	0	0
ptr_retrop07464	1	0	0	0	1	0
ptr_retrom06040	1	0	0	1	0	0
ptr_retrom09976	0	0	0	0	0	2
ptr_retrom03562	4	2	2	1	0	41
ptr_retrop05465	1982	1747	2615	1142	569	316
ptr_retrop09697	38	61	65	54	22	64
ptr_retrom05666	3	1	1	3	1	8
ptr_retrom06110	203	158	174	324	193	55
ptr_retrop05461	0	0	0	0	0	0
ptriretrom36929	0	0	0	1	0	2
ptr_retrop05463	5	1	1	2	0	2
ptr_retrom03768	1	1	1	1	0	1
ptriretrop22770	0	0	0	0	0	0
ptr_retrop05476	0	0	0	0	0	3
ptriretrom42398	3	0	1	0	0	0
ptr_retrop05469	0	0	0	1	0	1
ptriretrop41818	0	0	0	0	0	0
ptriretrom09120	0	1	0	0	0	0
ptr_retrop06654	370	124	360	514	729	94
ptriretrom40123	0	1	0	2	3	4
ptr_retrop07468	0	0	0	0	0	1
ptr_retrop02111	69	46	80	157	85	105
ptriretrom29195	0	0	0	0	0	0
ptriretrom31801	0	1	2	0	0	0
ptr_retrom09374	0	0	0	0	0	0
ptr_retrom05087	1	0	0	1	1	0
ptr_retrop05712	0	0	0	1	0	0
ptr_retrom09370	1	4	4	0	1	0
ptr_retrop05710	6	0	0	0	0	0
ptr_retrom09018	0	0	0	0	0	0
ptriretrop13530	0	0	0	0	2	0
ptr_retrom08696	0	0	0	0	0	0
ptr_retrop05488	6	10	8	9	19	2
ptr_retrop05486	0	0	0	0	0	0
ptriretrom41538	1	0	0	1	1	0
ptriretrop32123	0	0	0	2	2	1
ptr_retrop10504	4	2	1	5	0	1
ptriretrom29759	0	0	0	0	0	0
ptr_retrop05480	1	1	0	0	1	3
ptr_retrom04424	0	0	0	0	0	0
ptr_retrom04427	0	0	0	0	0	0
ptr_retrom04426	0	0	0	0	0	0
ptriretrom05639	0	0	0	0	0	4
ptr_retrom04420	0	0	0	1	2	0
ptr_retrom04930	9	3	0	1	0	0
ptriretrom05635	0	0	0	0	0	0
ptriretrop23843	3	0	0	0	0	0
ptr_retrop02595	0	0	0	0	4	0
ptr_retrop02597	0	0	0	0	0	0
ptr_retrom02360	0	0	0	3	2	3
ptr_retrom05401	0	0	0	1	0	0
ptriretrom32595	0	0	1	1	1	0
ptr_retrom05404	3	1	1	2	0	6
ptr_retrom06682	0	1	2	5	0	0
ptr_retrom06680	2	1	0	3	0	0
ptr_retrop02060	4	0	0	1	0	0
ptr_retrop02061	1	1	0	1	1	0
ptriretrop23745	0	0	0	0	0	0
ptr_retrop07623	11	3	4	14	3	0
ptriretrop30981	2	3	1	2	0	8
ptr_retrom06689	0	0	0	0	0	0
ptr_retrom06688	0	0	0	0	0	4
ptr_retrop03225	1	0	0	2	0	1
ptr_retrop03227	4	3	8	4	4	2
ptr_retrop03226	1	1	0	6	1	0
ptr_retrom08937	0	0	0	0	0	0
ptr_retrom06821	3	0	0	0	0	45
ptr_retrop03223	0	0	0	0	0	50
ptr_retrom08934	0	0	0	0	0	0
ptr_retrop03880	1	0	0	0	0	0
ptr_retrop03883	2	3	0	2	0	0
ptriretrom40013	25	18	20	42	39	8
ptriretrop32692	0	1	0	2	0	0
ptriretrom29572	1	2	0	1	0	8
ptriretrom27566	3	6	3	1	1	2
ptr_retrop09903	0	0	1	0	0	0
ptr_retrop09901	7	9	2	14	9	6
ptriretrop13224	0	0	0	0	0	0
ptr_retrom07038	5	1	0	0	0	0
ptriretrom31813	0	0	0	0	0	0
ptriretrom27767	0	0	0	0	0	0
ptr_retrop10435	27	21	15	57	91	2
ptr_retrom09202	0	0	0	0	0	0
ptr_retrop10437	0	0	0	0	0	0
ptr_retrop10345	2	2	0	3	1	0
ptriretrop06008	1	0	2	1	0	0
ptriretrom15106	0	0	0	0	0	1
ptr_retrom04331	1	0	0	0	0	0
ptr_retrom09303	54	16	565	95	43	3
ptr_retrop08422	4	3	0	4	0	1
ptr_retrom02218	0	0	0	0	0	0
ptr_retrom05539	0	0	0	0	0	0
ptr_retrom04336	220	38	61	192	94	11
ptr_retrom05536	0	1	1	0	0	0
ptr_retrom08376	2	2	1	0	0	0
ptr_retrom05530	1	0	0	2	0	3
ptriretrom32823	1	2	4	3	0	0
ptriretrop41317	3	0	0	0	0	0
ptr_retrom07510	9	9	7	17	11	3
ptr_retrom02810	0	2	0	1	0	3
ptriretrom09254	0	2	0	0	0	0
ptr_retrom03819	0	1	0	0	1	1
ptr_retrom02817	3	0	1	1	1	0
ptr_retrop03087	4	2	1	8	1	2
ptr_retrop06580	0	0	0	0	0	0
ptr_retrom08847	0	0	0	0	0	0
ptr_retrom02818	2	1	0	0	2	0
ptriretrom08266	695	898	841	1554	783	117
ptr_retrom03811	0	0	0	0	0	1
ptr_retrom08841	0	1	0	0	0	0
ptr_retrom03812	1	0	1	0	1	0
ptr_retrom09794	584	440	254	991	767	1165
ptr_retrom10649	8	4	19	14	9	2
ptr_retrom09796	107	131	97	168	92	184
ptr_retrom09753	4	2	0	0	0	1
ptr_retrop07694	0	0	0	0	2	1
ptriretrom13857	0	0	0	0	0	0
ptr_retrop07697	32	22	5	28	23	983
ptr_retrop02843	1	0	0	0	0	0
ptr_retrom10642	0	0	0	0	0	1
ptr_retrom10643	24	27	17	46	11	6
ptr_retrop02846	0	0	0	5	2	3
ptr_retrom09799	0	2	0	0	0	0
ptr_retrom10646	8	10	4	3	12	5
ptr_retrom09756	6	16	1	2	3	0
ptriretrom41313	1	0	1	5	0	5
ptr_retrop10235	0	0	0	0	0	0
ptriretrop43160	0	0	0	0	0	0
ptriretrom36163	2631	4938	4736	4786	2214	1425
ptr_retrom07113	24	7	8	40	5	107
ptr_retrop10723	10	4	3	4	2	5
ptr_retrop07166	12	2	0	10	0	0
ptriretrop14446	1	0	0	0	0	0
ptr_retrom07450	2	0	3	5	0	0
ptriretrop31363	11	9	2	64	26	1
ptriretrop29289	1	1	2	0	1	14
ptriretrom30180	19	13	17	23	5	4
ptr_retrom09672	0	0	0	0	0	0
ptr_retrop06340	0	0	0	0	0	0
ptr_retrom08654	4	0	3	3	10	11
ptr_retrop07438	0	0	0	0	0	0
ptr_retrop07439	1	0	0	0	0	4
ptriretrom37568	0	1	0	0	0	2
ptriretrom37219	139	67	236	383	226	61
ptriretrom34180	0	0	1	0	0	11
ptr_retrop07346	3	0	0	0	0	149
ptriretrop41826	0	0	0	0	0	0
ptr_retrom10609	6	2	0	2	0	0
ptr_retrom06794	8	16	5	9	7	6
ptriretrop19793	1	0	0	0	0	0
ptriretrop23186	0	0	0	0	0	0
ptr_retrop03157	105	19	1	0	0	56
ptr_retrop03155	12	4	0	1	0	6
ptr_retrop10165	6	1	0	0	0	0
ptriretrop26851	0	0	1	0	0	0
ptr_retrom01896	0	1	2	2	0	0
ptriretrom30461	0	0	0	0	0	1
ptr_retrom07240	1	0	0	0	0	0
ptriretrop25837	5	0	0	1	0	0
ptr_retrop06449	3	2	4	5	4	0
ptriretrop07358	43	56	16	12	1	54
ptriretrop26277	0	1	0	0	0	0
ptr_retrom01489	0	0	0	0	0	0
ptriretrop19060	112	39	118	289	62	18
ptriretrop34613	4	4	0	2	0	0
ptriretrop19066	2	4	1	1	0	0
ptr_retrop07692	0	0	0	0	0	0
ptriretrom31832	297	128	179	648	478	113
ptr_retrom06737	50	17	223	349	165	568
ptriretrom12424	3	0	1	4	1	514
ptriretrom12454	2099	2277	1837	2945	3711	1228
ptriretrom26038	0	3	0	1	0	0
ptriretrop32673	14	5	1	12	1	22
ptriretrop18330	0	0	0	0	0	0
ptriretrom41683	0	0	1	0	0	2
ptr_retrop01803	1	2	3	9	4	0
ptr_retrop01800	0	2	0	0	0	104
ptr_retrop08690	1	3	0	0	0	0
ptriretrop24681	0	0	0	0	0	0
ptriretrop19247	0	0	0	0	0	0
ptr_retrop07237	10	20	12	12	9	1
ptr_retrop07234	0	0	0	0	0	0
ptriretrop30745	6	3	0	5	0	7
ptriretrop11093	0	0	0	0	0	1
ptr_retrop09864	2	0	3	0	0	0
ptriretrop22584	0	0	0	0	0	0
ptriretrom07565	5	3	4	5	1	9
ptr_retrom10263	0	0	0	0	0	0
ptr_retrop03719	1	0	0	0	0	0
ptr_retrom04434	0	0	0	0	0	0
ptr_retrom11111	2	0	0	0	0	0
ptr_retrom11110	5	0	0	6	0	0
ptriretrop11651	1	0	0	0	0	3
ptriretrom34050	233	420	148	192	103	69
ptr_retrop03713	1	0	0	0	0	1
ptr_retrop03932	0	0	0	0	0	0
ptriretrom13184	1	1	1	0	0	0
ptr_retrop03714	0	0	0	0	0	0
ptr_retrop03717	11	24	12	11	9	5
ptr_retrom07604	11	12	1	9	1	2
ptr_retrop10946	5	3	4	5	0	0
ptriretrom30210	14	0	0	0	0	0
ptriretrom31041	0	0	0	0	0	0
ptr_retrop10947	2	1	0	0	0	0
ptr_retrop07068	0	0	0	0	0	0
ptriretrop35292	0	0	0	0	0	0
ptr_retrop01937	17892	7152	1302	1526	1324	104
ptriretrom25194	0	0	0	0	0	0
ptriretrop24077	2	2	0	3	0	0
ptr_retrom02351	8	0	1	3	1	0
ptriretrom12929	0	0	0	0	0	0
ptr_retrop09700	44	18	8	78	44	5
ptriretrom42438	101	58	87	189	75	20
ptr_retrom04258	9	5	2	2	0	0
ptriretrop41014	4	3	1	4	1	0
ptriretrop30424	2	5	5	3	0	2
ptriretrop14253	3	1	2	1	0	3
ptriretrop24895	0	0	0	0	0	0
ptr_retrom09528	1	0	0	6	0	0
ptriretrop10436	0	0	0	0	0	0
ptr_retrop08405	0	0	0	0	1	0
ptriretrop15155	310	765	374	713	247	108
ptr_retrom07011	0	0	0	0	0	0
ptr_retrop09476	2574	1657	4924	2753	1062	845
ptr_retrom02564	2	1	0	0	0	0
ptriretrop34679	0	1	0	0	0	0
ptriretrop33842	1	0	0	0	0	0
ptr_retrom07017	82	47	15	45	9	6
ptr_retrop06003	0	1	0	1	0	0
ptriretrop37628	0	0	0	1	0	0
ptr_retrom07018	1	1	0	0	0	0
ptriretrop26081	0	0	0	0	0	0
ptriretrop34535	9	0	1	10	1	0
ptriretrom08898	0	0	0	0	0	1
ptriretrop20828	5	2	2	9	1	0
ptr_retrom11023	1	0	0	1	0	0
ptriretrop42971	1	0	0	0	1	1
ptr_retrom11021	0	0	0	0	0	3
ptr_retrom11027	1	2	0	0	0	2
ptriretrom10988	3	1	0	1	0	2
ptriretrop18583	1167	745	923	784	732	221
ptriretrop18689	2	0	1	0	0	0
ptriretrom02932	3	0	6	0	0	0
ptr_retrom11028	0	0	0	0	0	0
ptr_retrom10513	0	0	2	1	1	1
ptriretrom25592	25	15	13	38	23	5
ptriretrom25611	0	0	0	0	0	0
ptriretrop08185	0	0	0	0	0	0
ptr_retrom06693	0	0	0	0	0	0
ptriretrop24015	4	9	2	2	4	0
ptr_retrom03793	27	85	14	123	69	46
ptr_retrom03791	0	0	0	1	0	3
ptr_retrom03797	5	4	0	5	2	1
ptr_retrop09576	2	0	1	24	0	4
ptriretrop31950	0	0	0	0	0	1
ptriretrom34463	109	65	87	125	29	25
ptriretrom06494	29	26	7	48	1	7
ptr_retrom09544	0	0	0	0	0	3
ptriretrop20925	2	2	0	2	0	0
ptriretrom35126	0	0	0	0	0	0
ptriretrom33843	1	0	0	0	0	0
ptr_retrop08537	0	0	0	0	0	0
ptr_retrop08531	0	0	0	0	0	1
ptriretrom42321	0	0	1	0	0	0
ptriretrop41554	1	0	0	0	0	1
ptr_retrom03358	7	2	1	2	0	1
ptriretrom07703	5	12	11	3	2	5
ptr_retrop04055	60	29	1	91	0	3
ptriretrop06740	3	0	5	12	0	0
ptr_retrop04053	0	0	0	0	0	0
ptr_retrop04052	125	67	19	33	33	410
ptr_retrop04050	6	3	0	4	3	1
ptr_retrom09324	1	2	2	3	0	2
ptriretrom25056	54	25	10	22	22	45
ptriretrom08895	80	108	41	154	84	276
ptr_retrop08429	11	2	0	4	3	0
ptr_retrom11080	6	8	2	10	5	0
ptr_retrop05674	0	0	0	0	0	0
ptr_retrop05677	1	2	0	3	1	0
ptriretrom10368	1637	2329	2045	2467	2599	2299
ptr_retrop05673	27	14	4	9	0	2
ptr_retrop05908	31	28	146	346	352	33
ptr_retrom11129	65	40	244	661	557	17
ptr_retrop03894	0	0	0	0	0	0
ptriretrom20972	207	127	56	302	243	47
ptriretrom35029	0	0	0	0	0	0
ptriretrop15308	0	0	0	0	0	0
ptr_retrom02171	5	11	2	11	7	10
ptr_retrop04999	0	0	0	0	0	0
ptr_retrom11127	4	0	0	0	0	0
ptriretrom07941	0	4	0	0	0	1
ptr_retrop03236	2	1	3	1	0	0
ptriretrop04075	467	215	321	348	141	1704
ptr_retrop09599	4	4	0	2	1	1
ptr_retrom02178	204	157	85	129	97	21
ptriretrop36372	2	0	0	5	12	1
ptr_retrop09757	8	1	0	2	0	0
ptr_retrop09756	16	2	6	8	3	0
ptriretrop20726	0	0	0	0	1	0
ptriretrop11310	35	16	21	43	32	17
ptr_retrop09752	9	7	3	7	3	23
ptr_retrop08547	16	18	11	11	4	13
ptriretrom31745	0	1	1	1	2	2
ptr_retrop08766	0	0	5	0	1	0
ptr_retrom09478	18	13	8	2	2	4
ptr_retrop02548	0	1	0	0	1	0
ptr_retrop05274	0	1	0	0	0	0
ptriretrop12840	0	0	0	0	0	0
ptr_retrom02779	0	0	0	0	0	0
ptriretrom34860	5	0	0	0	0	0
ptr_retrop08625	34	37	31	67	34	13
ptr_retrop08626	6	15	6	13	1	2
ptriretrop08218	2	0	0	0	0	0
ptriretrom24278	3	0	0	3	0	0
ptriretrop12686	0	1	0	1	0	3
ptr_retrop07435	527	581	453	433	114	488
ptr_retrom07509	142	62	28	84	40	17
ptriretrom03961	0	0	0	0	0	0
ptr_retrop05012	0	0	0	2	0	0
ptr_retrom09890	6	13	2	8	3	1
ptriretrop11889	0	0	0	0	0	1
ptr_retrop05016	1	0	0	0	0	2
ptr_retrop05017	2	2	1	7	3	5
ptr_retrop05018	6	2	0	8	1	0
ptr_retrom02013	6	3	0	1	0	0
ptr_retrom07498	0	0	0	1	0	0
ptriretrop37348	0	0	0	0	0	0
ptriretrop41129	0	0	0	0	0	0
ptr_retrop04870	0	0	0	0	0	0
ptriretrom33148	450	711	247	485	190	80
ptr_retrop04874	0	0	4	1	0	11
ptr_retrom08769	0	0	0	1	0	0
ptriretrom20800	1	1	0	0	1	1
ptr_retrop06919	0	0	0	0	0	0
ptr_retrom06058	3	1	0	3	6	0
ptr_retrom06059	2	0	0	0	0	0
ptr_retrom09941	3	6	0	0	0	3
ptr_retrom09940	6	0	1	4	0	0
ptr_retrom09943	5	3	0	2	0	1
ptr_retrop09987	48	27	0	0	1	0
ptr_retrom06052	0	2	1	0	1	0
ptriretrom32109	0	0	0	1	0	0
ptriretrop11925	1	0	0	0	0	34
ptriretrom26473	0	0	0	0	0	0
ptr_retrom05650	12	1	1	5	4	9
ptr_retrop05470	1	2	2	0	1	0
ptr_retrom05652	0	0	0	1	0	0
ptr_retrom03778	3	2	2	4	7	2
ptr_retrom05654	2	0	0	0	0	0
ptr_retrop05474	0	0	0	0	1	0
ptr_retrom05656	1	0	0	0	0	1
ptr_retrop08755	9	3	0	6	2	0
ptr_retrop08756	2	4	14	75	233	2
ptr_retrom03770	1	0	1	0	1	1
ptr_retrom03771	3	1	0	2	2	2
ptr_retrop08752	0	0	0	0	0	0
ptr_retrom09005	3	1	2	4	0	0
ptr_retrom07207	0	0	0	0	0	0
ptr_retrop05709	0	0	3	7	0	1
ptriretrop20211	0	0	0	0	0	0
ptr_retrop05705	0	0	0	0	0	0
ptr_retrop02439	1	0	1	2	0	0
ptr_retrop05707	7	1	1	0	1	1
ptriretrop20217	2	0	0	0	2	6
ptriretrom06832	16	7	6	6	3	4
ptriretrom26330	6	1	0	0	0	0
ptriretrom29766	0	0	0	0	0	0
ptriretrop43379	3	1	1	10	1	0
ptr_retrop09479	0	0	0	0	0	0
ptr_retrop07329	0	0	0	0	0	0
ptriretrop09639	0	0	1	0	0	10
ptr_retrom04432	0	0	2	0	0	0
ptriretrom36229	195	13	14	20	0	18
ptriretrop26727	20	56	0	4	0	1
ptr_retrom05438	0	0	0	0	0	1
ptr_retrom04922	0	0	0	0	0	0
ptr_retrom04435	0	0	0	0	0	43
ptr_retrom05435	2	2	0	1	0	2
ptriretrop42471	0	0	0	1	0	0
ptriretrom36222	9	4	2	0	0	0
ptr_retrom05431	0	0	4	77	91	13
ptr_retrom04929	173	160	229	130	92	152
ptr_retrom05433	1	0	0	1	0	4
ptr_retrom10269	0	0	0	0	0	0
ptr_retrop02055	0	0	0	0	0	0
ptriretrom09380	454	185	82	411	236	70
ptr_retrop02725	0	1	0	3	2	3
ptr_retrop06006	10	0	1	0	0	1
ptr_retrop02050	4	2	2	2	1	4
ptr_retrop09579	0	0	1	1	0	0
ptriretrop15524	0	1	0	1	2	0
ptriretrom35938	0	0	0	0	0	0
ptr_retrop09575	1	2	2	2	0	6
ptr_retrop09574	0	0	0	0	0	0
ptriretrop21459	299	318	445	502	732	110
ptr_retrop10372	0	0	0	4	4	0
ptr_retrop03232	1	0	0	1	0	0
ptr_retrop03233	0	0	0	0	0	0
ptr_retrop03230	1	1	1	1	0	0
ptr_retrop03895	0	0	0	0	0	0
ptriretrop16540	0	0	0	0	0	0
ptriretrop17018	107	6	3	2	1	8
ptr_retrop03235	0	0	0	5	1	0
ptr_retrom06464	0	0	0	0	0	0
ptr_retrom08929	5	1	1	5	2	1
ptr_retrop07657	0	0	0	0	0	0
ptriretrop29620	2	0	0	2	1	0
ptr_retrop02543	1	1	0	0	4	0
ptriretrom30970	0	0	0	0	0	0
ptr_retrop03898	2	0	0	0	0	1
ptr_retrop02540	0	0	0	0	0	0
ptriretrop24642	0	0	0	0	0	0
ptr_retrom07656	0	0	0	0	0	1
ptr_retrom07655	0	0	0	1	0	0
ptriretrop13258	0	1	0	0	0	0
ptr_retrop09977	0	0	0	0	0	0
ptr_retrop06641	2	2	1	1	1	0
ptr_retrom07651	2	0	1	1	0	0
ptr_retrop09974	13	2	7	30	7	9
ptriretrop29463	3	0	0	1	1	4
ptriretrop13256	9	2	0	0	0	2
ptr_retrom09419	6	5	0	0	0	1
ptr_retrop07641	0	0	0	0	0	0
ptr_retrop06964	1	0	4	0	0	0
ptriretrop35728	0	0	0	0	1	0
ptr_retrom04324	0	0	0	0	0	0
ptriretrom18989	0	0	0	0	0	10
ptriretrom18988	3	5	1	4	4	0
ptriretrop32147	3	7	4	4	3	1
ptr_retrom01694	0	0	0	0	0	1
ptriretrom05716	6	3	0	12	1	1
ptr_retrom05508	1	2	0	0	0	0
ptr_retrop06913	2	0	1	2	1	2
ptr_retrop06915	1	1	0	0	0	0
ptriretrop15639	0	0	0	0	0	0
ptriretrop37219	0	0	0	0	0	0
ptr_retrom05501	5	0	0	7	2	0
ptr_retrom07435	5	0	1	0	0	0
ptriretrom36440	2	1	0	2	0	1352
ptr_retrom05504	1	0	15	4	11	12
ptr_retrom05507	35	26	7	10	1	4
ptr_retrop06594	2	2	2	2	1	0
ptr_retrop06595	0	0	0	2	0	0
ptr_retrom04105	0	0	0	0	0	0
ptriretrom36578	0	0	0	0	0	0
ptr_retrom04103	12	8	4	14	33	6
ptriretrom18969	778	473	503	626	856	375
ptriretrom15488	0	0	0	1	0	0
ptr_retrop10391	1	1	0	2	1	1
ptr_retrom03803	11	5	0	2	4	1
ptriretrom33096	1	1	1	1	4	7
ptr_retrom03801	2	0	0	2	0	0
ptr_retrom08850	1	0	0	2	0	0
ptr_retrom08851	1	0	0	0	0	0
ptr_retrom03804	10	4	1	2	4	6
ptr_retrom03805	7	2	0	0	0	0
ptriretrom21434	167	305	434	344	696	158
ptriretrom28702	3	0	1	3	0	1
ptr_retrop01729	0	0	0	0	0	0
ptr_retrom10671	0	0	0	0	0	0
ptr_retrom10670	1	0	1	1	3	0
ptr_retrom10672	0	0	0	1	0	1
ptr_retrop09807	0	0	0	1	0	4
ptriretrop26865	0	0	0	0	0	0
ptriretrop39297	0	0	0	0	0	0
ptr_retrom10678	194	44	18	25	26	1
ptr_retrop09801	0	0	0	0	0	2
ptr_retrom10076	2	0	0	1	1	1
ptr_retrom10075	1	0	0	0	0	9
ptr_retrom10072	0	0	0	0	0	2
ptr_retrom10070	3	0	0	0	0	1
ptriretrom12060	0	0	0	0	0	0
ptriretrop39102	0	1	0	0	0	1
ptriretrop06102	0	1	0	0	0	0
ptriretrop35469	0	0	0	0	0	0
ptr_retrop10244	14	13	0	2	4	2
ptriretrom41831	0	0	0	0	0	0
ptriretrom33414	1	1	0	1	0	0
ptr_retrop10088	2	0	1	12	0	0
ptr_retrop11620	10	12	2	8	3	3
ptr_retrop06540	3	0	0	2	0	3
ptr_retrop10085	5	0	1	7	10	0
ptr_retrop10084	0	0	0	0	0	0
ptr_retrop10087	1	0	1	2	1	0
ptr_retrom07432	0	0	0	0	0	0
ptr_retrop10080	3	1	1	0	0	0
ptr_retrop09696	0	0	0	0	0	0
ptriretrop41300	0	0	0	0	0	1
ptr_retrom05975	7	0	0	1	0	0
ptriretrom34192	0	0	0	0	0	0
ptr_retrom05600	0	0	0	0	0	0
ptr_retrom01889	4	7	2	1	2	0
ptr_retrom06045	0	0	0	0	0	1
ptr_retrop00674	0	0	0	0	0	1
ptr_retrop02533	3	0	0	1	0	1
ptr_retrom01881	10	3	2	9	3	1
ptr_retrom01885	0	0	0	0	1	1
ptr_retrom01886	1	0	0	3	0	0
ptr_retrom05607	10	9	9	13	7	1202
ptriretrom21500	2	2	0	0	0	0
ptriretrop32485	2	1	1	4	2	1
ptr_retrop09468	1	0	0	0	0	0
ptriretrop05911	3	1	1	2	1	1
ptriretrop42560	0	0	0	0	0	0
ptriretrop37916	46	8	64	170	45	1
ptr_retrop06646	0	0	0	0	0	0
ptriretrop31577	91	73	58	160	206	16
ptriretrom12289	2	0	2	0	0	1
ptr_retrop09983	1	0	0	0	0	0
ptr_retrop10885	0	0	0	0	0	0
ptr_retrop10884	0	1	0	0	0	0
ptriretrop35595	3	0	0	0	0	0
ptriretrom06363	71	40	30	167	72	12
ptr_retrop08436	0	0	0	0	0	0
ptr_retrop06856	2	0	0	0	0	0
ptr_retrop07531	0	0	0	0	0	17
ptr_retrop10888	0	0	0	0	0	0
ptr_retrop07533	987	824	671	1872	1260	222
ptr_retrop03091	0	0	0	10	1	0
ptr_retrom02997	0	0	0	1	0	3
ptr_retrom01715	0	0	0	0	0	0
ptr_retrom02993	7	2	3	0	5	0
ptr_retrop01813	0	0	0	0	0	2
ptriretrom21291	0	0	0	1	0	0
ptr_retrom06047	2	0	1	1	0	1
ptr_retrop08445	0	1	0	1	0	0
ptr_retrop07242	0	0	0	0	0	0
ptr_retrop02057	2	3	1	1	1	1
ptr_retrop07247	0	0	0	0	0	0
ptr_retrop10868	0	0	0	0	0	0
ptr_retrop10867	0	0	0	0	0	0
ptr_retrop10866	3	0	2	3	0	1
ptr_retrop07249	3	3	1	1	0	0
ptr_retrop10864	0	0	0	0	0	0
ptriretrop27934	10	14	2	17	7	2
ptriretrop34234	5	3	0	1	0	0
ptr_retrop10860	1	0	0	0	0	0
ptr_retrom08774	0	2	2	0	0	1
ptr_retrom11105	1	2	0	2	0	1
ptr_retrop03704	32	24	14	49	21	18
ptr_retrop03702	93	92	101	94	198	135
ptriretrop36966	0	0	0	0	0	0
ptr_retrom03376	11	31	23	9	0	2
ptr_retrop05604	0	0	1	0	0	0
ptr_retrom03379	233	35	39	54	14	59
ptr_retrom04268	5	0	2	0	0	0
ptr_retrom11108	0	0	0	0	0	4
ptriretrom21610	1	2	3	5	1	0
ptr_retrop03708	4	2	0	0	1	24
ptr_retrop03709	4	3	0	3	0	1
ptr_retrop09594	0	0	0	0	0	0
ptr_retrom08854	0	0	0	0	0	0
ptriretrop18431	1	0	0	0	0	0
ptriretrop18437	3	1	0	1	0	1
ptr_retrop01960	608	994	534	1555	1303	221
ptr_retrop01962	44	38	7	37	36	16
ptr_retrop09692	2	0	0	0	1	0
ptr_retrom06872	0	0	0	0	0	0
ptr_retrop06838	1	0	0	0	0	0
ptriretrom36917	0	0	0	0	0	0
ptriretrom36914	0	0	0	0	0	0
ptr_retrop05602	2	0	0	0	1	3
ptr_retrom08419	1	1	0	2	0	0
ptriretrom33091	0	0	0	0	0	0
ptr_retrom03015	19	40	8	31	4	11
ptriretrom18500	0	0	0	0	0	0
ptriretrom31057	1	2	0	0	0	1
ptriretrom34650	0	2	0	0	0	1
ptr_retrom03011	2	0	2	1	0	0
ptr_retrom04108	1	0	0	2	0	0
ptr_retrom03013	1	0	5	0	0	2
ptriretrom42019	7	2	5	15	2	4
ptriretrop34544	14	7	6	19	1	32
ptriretrop12678	0	0	0	0	0	0
ptr_retrom07005	1	0	0	0	0	0
ptr_retrop08868	0	0	0	0	0	0
ptriretrop24847	1	0	0	0	0	0
ptr_retrom07001	13	2	19	75	26	13
ptriretrom40474	12	3	1	1	1	0
ptriretrom38807	20	21	21	11	1	75
ptriretrom07376	28	21	23	45	6	13
ptr_retrom02515	0	0	1	0	0	0
ptriretrop42513	0	0	0	0	0	0
ptriretrop12940	2	0	3	3	1	0
ptr_retrom02519	0	0	0	0	0	0
ptriretrom04576	3	0	0	2	2	0
ptr_retrom01657	0	0	0	0	0	0
ptriretrop08375	11	12	2	3	2	1
ptriretrom10999	84	13	1	39	0	217
ptriretrom03042	0	1	0	2	22	0
ptriretrop35131	1	0	0	3	1	1
ptr_retrom06975	0	1	1	0	1	0
ptr_retrom10525	1	0	0	1	0	0
ptr_retrom06677	1	1	2	3	0	0
ptriretrom29342	0	0	0	0	0	10
ptriretrom34658	0	0	0	0	0	0
ptr_retrop07349	51	66	50	28	16	8
ptr_retrom06977	0	0	0	0	1	1
ptr_retrom09214	2	0	0	0	0	7
ptriretrop08190	1	0	0	0	0	0
ptriretrop04403	0	0	0	0	0	0
ptr_retrom06979	3	3	11	4	9	10
ptriretrom41815	1	0	0	0	0	68
ptr_retrop01639	0	0	0	0	0	0
ptriretrom21969	0	0	0	0	0	0
ptriretrom41087	0	0	0	0	0	0
ptr_retrop07274	19	15	3	19	0	2
ptriretrom21966	1	0	0	1	1	1
ptr_retrom08400	562	17	37	200	53	5
ptriretrop11259	0	0	0	0	0	0
ptriretrop40040	2	0	1	0	0	0
ptriretrom35152	0	0	1	0	0	0
ptriretrom25943	1	1	0	0	0	0
ptriretrom10975	165	110	102	514	299	48
ptr_retrop08509	0	0	0	0	0	1
ptr_retrom10679	0	0	0	0	0	12
ptr_retrop02373	43	68	13	27	28	3
ptriretrom23636	0	0	0	0	0	0
ptr_retrop09802	0	0	0	0	0	0
ptr_retrop04047	17	18	5	14	9	1
ptr_retrop04040	1	0	0	0	0	47
ptr_retrom09132	2	0	1	8	0	0
ptriretrop06757	4	0	1	0	0	0
ptr_retrom07232	0	0	0	0	0	0
ptriretrom25663	0	0	0	4	0	0
ptr_retrom01849	0	0	0	0	0	0
ptr_retrop05393	139	119	62	45	38	51
ptriretrom25865	0	0	0	0	0	0
ptr_retrop10145	3	2	0	4	3	0
ptr_retrop05396	0	0	0	0	0	0
ptr_retrom09522	1	0	0	0	0	2
ptr_retrop06793	0	0	0	0	0	0
ptr_retrop05399	6	1	1	3	2	2
ptriretrom26510	0	0	0	0	0	0
ptriretrom24646	1	1	0	0	0	0
ptr_retrop09582	1	0	2	2	5	0
ptriretrom26812	1	0	1	0	0	0
ptr_retrop09580	2	2	1	2	2	3
ptriretrom20964	0	0	0	0	0	0
ptr_retrom08921	1	0	0	0	0	0
ptriretrop05594	88	54	41	124	114	51
ptr_retrop01417	0	0	0	0	0	0
ptriretrom10175	0	0	0	0	0	0
ptr_retrop09588	4	1	0	10	0	9
ptr_retrop07111	1	0	1	5	0	0
ptr_retrom01846	0	0	1	0	0	0
ptriretrom07958	0	2	3	26	4	3
ptr_retrom09526	0	0	1	1	0	0
ptr_retrop05245	2	0	0	1	0	0
ptr_retrom02766	2	0	1	3	0	0
ptr_retrop05246	0	1	0	0	0	0
ptr_retrop05241	1	0	0	2	0	0
ptr_retrom02761	0	0	1	2	0	1
ptr_retrop09743	0	0	0	0	0	8
ptr_retrop08615	9	13	2	13	2	0
ptr_retrop08617	0	0	5	0	0	0
ptr_retrom09524	3	1	3	2	3	2
ptr_retrop09748	0	0	0	0	0	0
ptr_retrop05248	0	1	0	1	0	0
ptr_retrop08612	26	23	4	34	9	1
ptriretrom06020	0	3	0	4	0	0
ptriretrom10288	3	1	1	2	0	1
ptriretrop12696	15	9	8	15	7	2
ptriretrom30315	0	1	0	0	0	0
ptr_retrop04602	29	31	17	43	27	20
ptr_retrop04600	4	4	1	3	0	0
ptr_retrom09880	0	0	1	0	0	0
ptr_retrom08087	0	0	0	0	0	8
ptr_retrom11112	1319	2571	741	648	155	204
ptriretrom11159	0	1	0	0	0	0
ptr_retrop06893	0	0	0	0	0	0
ptr_retrom06424	0	1	1	1	0	0
ptr_retrom09888	43	7	0	1	1	1
ptriretrop38148	3	0	0	0	0	0
ptriretrop23649	0	0	0	0	0	0
ptr_retrom06428	0	0	0	0	0	1
ptriretrom31796	0	1	0	1	2	0
ptr_retrom10961	0	0	0	0	0	0
ptr_retrom08923	0	0	0	0	0	0
ptriretrop23003	27	15	3	8	3	1
ptriretrom14291	4	18	1	4	0	0
ptriretrop14132	5566	4434	5564	19546	10692	1350
ptr_retrop07342	0	0	0	0	0	1
ptriretrom11394	3	1	0	1	2	3
ptr_retrop10496	25	16	8	47	33	7
ptr_retrom10962	0	0	0	0	0	0
ptriretrom14053	0	0	0	0	0	0
ptr_retrop07148	0	0	0	0	0	0
ptriretrop34886	1	0	0	0	0	99
ptr_retrom05646	1	0	0	0	0	0
ptr_retrop02601	0	0	0	0	0	0
ptriretrop20024	1	2	0	2	0	2
ptriretrom22182	0	0	0	0	0	0
ptr_retrom05640	1	1	5	2	0	1
ptr_retrom05641	0	0	0	0	0	7
ptr_retrop08769	405	57	70	484	70	6
ptriretrom25668	0	0	0	2	0	0
ptr_retrom10989	0	0	0	0	0	14
ptriretrom28798	0	0	0	0	0	0
ptr_retrop05993	11	13	5	10	4	6
ptriretrom23608	0	1	0	0	0	0
ptriretrop27039	1	1	0	0	0	0
ptr_retrom03743	12	2	5	404	44	9
ptr_retrom03742	12	3	4	3	1	0
ptr_retrom03745	0	0	0	0	0	0
ptr_retrom03744	9	1	0	0	0	0
ptr_retrom10985	0	0	0	0	0	0
ptr_retrom03746	12	18	3	10	5	0
ptr_retrop05739	0	0	0	0	0	0
ptr_retrop05738	0	1	0	0	0	0
ptriretrop23904	0	0	0	0	0	0
ptr_retrop02425	3	1	1	1	0	0
ptriretrom27641	1168	650	601	938	191	197
ptr_retrom09310	0	0	0	0	0	0
ptriretrop26323	1045	1027	932	1820	915	237
ptr_retrop05736	1	0	1	0	0	0
ptr_retrop10522	0	0	0	0	0	11
ptr_retrop10523	7	7	2	10	0	1
ptr_retrop10521	3	3	1	0	0	0
ptr_retrop06885	0	0	0	0	0	0
ptr_retrop10527	1	0	1	0	0	0
ptriretrop35194	4	5	4	0	0	0
ptriretrom18350	0	0	0	0	0	0
ptriretrop37325	5	1	0	0	0	1
ptriretrom15276	0	0	0	1	0	0
ptriretrom18911	0	0	0	0	0	0
ptr_retrop08683	0	0	0	0	0	0
ptr_retrom05422	0	0	0	0	0	0
ptriretrom23089	0	1	0	1	1	2
ptr_retrom05426	175	66	13	91	8	5
ptriretrom32201	1	0	0	2	0	2
ptr_retrop02042	4	2	2	0	0	0
ptr_retrom06786	0	0	0	0	0	0
ptr_retrop08568	0	1	1	1	1	0
ptr_retrop02731	0	2	0	0	0	0
ptriretrop15537	2	3	0	0	0	0
ptriretrom09626	0	0	0	0	1	0
ptriretrop20113	4	1	5	9	1	5
ptr_retrop05021	0	1	1	0	0	0
ptriretrop32355	0	0	0	0	0	0
ptr_retrop05023	0	0	0	0	0	0
ptriretrop20115	10	0	1	10	0	2
ptr_retrop06617	1	0	0	0	0	0
ptr_retrom06131	2	0	0	0	0	0
ptr_retrom08529	0	0	0	0	0	1
ptr_retrom07487	3	4	1	6	1	7
ptr_retrop06611	0	0	1	0	0	0
ptr_retrop02554	0	0	0	1	0	0
ptr_retrom09967	195	43	15	345	56	10
ptriretrop17552	2	2	0	0	3	9
ptr_retrop02557	1	16	0	10	9	0
ptr_retrop02550	2	0	3	3	1	0
ptriretrom14874	0	0	0	1	0	0
ptr_retrop02552	5	10	3	6	0	1
ptr_retrop02775	1	3	0	2	0	0
ptr_retrom09404	0	0	1	0	0	4
ptr_retrom09405	3	0	3	1	0	0
ptriretrop03508	0	0	0	2	0	0
ptr_retrop10819	0	0	0	1	0	0
ptr_retrop09964	2	0	1	5	0	0
ptr_retrom06780	0	0	0	0	0	0
ptr_retrop10418	2	0	0	0	0	2
ptr_retrop09967	3	0	1	0	0	0
ptr_retrop10416	6	4	4	5	1	1
ptr_retrop09969	0	0	0	0	0	0
ptr_retrop10414	0	0	0	0	0	0
ptr_retrom06712	1	0	0	0	0	0
ptriretrop25771	0	0	0	0	0	0
ptr_retrop10411	0	1	0	0	0	1
ptr_retrop09646	0	0	0	0	0	0
ptriretrop14592	1206	630	314	1459	388	185
ptriretrom25992	0	0	0	0	0	0
ptr_retrop06928	1	0	0	0	0	0
ptr_retrom03551	0	0	0	0	0	0
ptr_retrom04352	0	0	0	0	0	0
ptr_retrom04357	0	0	0	3	0	0
ptr_retrop10307	0	0	0	1	1	0
ptr_retrop06295	2	1	0	0	2	0
ptr_retrom05516	3	0	0	0	0	6
ptr_retrop11388	0	0	0	0	0	0
ptr_retrom05514	1	2	0	0	0	13
ptr_retrom05512	191	117	387	1662	745	35
ptriretrop17318	0	0	0	1	0	0
ptr_retrom05511	1172	1665	1428	4342	2997	2818
ptr_retrop11381	1	2	0	1	0	0
ptriretrom15908	2	0	0	0	1	0
ptriretrom32667	0	0	0	0	0	23
ptr_retrop11385	0	0	0	0	0	0
ptriretrop07998	743	859	618	1338	71	11
ptr_retrom06075	0	0	0	0	0	1
ptr_retrom06845	0	1	0	0	0	1
ptr_retrom04172	0	0	0	0	0	0
ptr_retrom04171	1	0	0	0	0	0
ptr_retrom04170	0	3	1	3	0	0
ptr_retrom06841	0	0	0	1	0	0
ptr_retrop10383	0	0	0	0	0	0
ptr_retrom08682	0	0	0	0	0	0
ptr_retrom08861	1	1	0	1	2	1
ptr_retrop11529	0	2	0	4	4	0
ptr_retrom06077	0	0	0	0	0	0
ptr_retrom06849	0	0	0	0	0	0
ptr_retrop03556	6	5	14	9	6	0
ptr_retrom08867	0	0	1	3	1	0
ptriretrom28732	0	0	0	0	0	0
ptriretrop39288	0	0	0	0	0	0
ptriretrop25610	0	0	0	0	0	0
ptr_retrom07117	0	0	0	0	0	0
ptr_retrop09818	0	1	0	0	1	0
ptr_retrop09819	2	0	0	0	0	0
ptr_retrop07643	0	0	0	2	0	0
ptriretrom29931	0	0	0	0	0	0
ptr_retrop09814	2	0	1	0	0	0
ptr_retrom07751	21	11	3	6	1	0
ptr_retrop06728	0	1	0	0	1	335
ptr_retrom08048	0	1	2	2	0	0
ptr_retrop10258	23	40	5	31	6	7
ptr_retrom10065	0	0	0	0	0	0
ptr_retrom10067	0	0	0	0	0	0
ptriretrop35454	42	47	53	211	118	18
ptr_retrop08571	1	0	0	0	1	29
ptr_retrom09537	0	0	0	0	0	0
ptriretrom14098	0	0	0	0	0	0
ptr_retrop04142	0	0	0	1	0	0
ptr_retrom10068	10	1	3	3	0	2
ptriretrom40568	0	0	0	0	0	0
ptriretrom36143	0	0	0	1	0	0
ptr_retrop10705	9	6	37	284	699	9
ptr_retrop04066	508	584	549	1094	1012	9527
ptr_retrop07642	15	30	11	8	2	1
ptr_retrom08915	0	0	1	15	13	0
ptr_retrom06528	0	0	0	0	0	0
ptr_retrom08917	0	0	0	0	0	0
ptriretrom08914	4	2	0	3	0	1
ptriretrom37169	0	0	0	0	0	1
ptr_retrop10094	2	1	0	1	2	2
ptr_retrop10095	1	0	4	1	0	0
ptr_retrop07416	6	1	0	2	1	3
ptriretrop27589	9	2	1	5	2	1
ptr_retrom06515	0	0	0	0	0	2
ptr_retrop07415	1	2	1	0	0	3
ptr_retrop06666	0	0	0	0	0	1
ptr_retrom07403	0	0	0	0	0	1
ptr_retrom08358	278	148	175	325	139	3196
ptriretrop41808	1	0	0	0	0	0
ptriretrop08537	4	2	2	4	0	2
ptr_retrom08593	0	0	0	0	0	0
ptr_retrom07269	0	0	0	0	0	0
ptr_retrom08595	1	1	0	0	0	0
ptr_retrom09876	0	0	0	1	0	1
ptriretrom04385	3	1	0	0	0	0
ptr_retrom08599	0	0	0	0	0	0
ptr_retrom08598	1	12	0	0	0	0
ptr_retrop03172	27	24	8	33	8	26
ptr_retrop06523	0	3	3	2	0	0
ptriretrom28607	39	8	83	131	55	13
ptr_retrop03176	1	1	3	7	1	36
ptr_retrom06993	0	0	0	0	0	0
ptr_retrom06992	0	0	0	0	0	0
ptr_retrom08606	0	7	0	0	0	0
ptr_retrom06997	7	5	1	5	1	1
ptr_retrom06994	1	0	2	0	1	0
ptr_retrom09624	0	0	0	0	0	0
ptr_retrop00686	1	1	0	2	0	0
ptriretrom39872	2	0	0	0	0	4
ptr_retrom07467	0	1	0	0	0	6
ptr_retrom07460	0	0	1	0	0	2
ptr_retrom09623	0	0	0	0	0	0
ptr_retrop10677	64	51	7	25	3	51
ptr_retrom07754	0	0	0	0	0	1
ptriretrop13065	0	0	1	0	0	0
ptriretrom29027	13	5	8	17	14	3
ptriretrop30500	35	23	26	82	16	49
ptr_retrop06025	0	0	0	0	0	0
ptr_retrop05996	0	0	0	0	0	0
ptriretrop06241	0	0	0	0	0	0
ptriretrom15701	0	0	0	0	0	0
ptr_retrop10678	0	0	0	0	0	0
ptr_retrop01820	6	7	1	8	0	5
ptr_retrop01822	53	23	20	44	0	6
ptriretrom18426	0	0	0	0	0	0
ptr_retrom02982	0	0	0	0	0	2
ptriretrom16737	0	0	0	0	0	0
ptr_retrop01828	0	0	0	2	0	2
ptr_retrom02988	29	13	37	30	24	16
ptr_retrop09688	0	0	0	0	0	0
ptriretrop06585	0	1	2	3	0	8
ptriretrop31638	209	128	358	270	190	97
ptr_retrom07755	0	0	0	0	0	0
ptr_retrop10879	0	0	1	0	0	1
ptr_retrom08465	0	1	2	0	0	0
ptr_retrom08464	1	0	2	0	0	10
ptr_retrom03347	0	0	0	0	0	0
ptr_retrom06808	7986	2101	4964	13878	6636	734
ptr_retrom08461	0	0	0	0	0	0
ptr_retrop10871	10	6	19	85	61	4
ptr_retrom03343	6	2	2	0	0	1
ptr_retrop10873	0	0	0	0	0	1
ptr_retrom00929	0	0	0	0	0	1
ptr_retrom11132	7	2	1	0	1	0
ptr_retrop03777	0	0	0	0	0	3
ptr_retrom01984	24	4	6	7	5	3
ptr_retrom09360	0	0	0	0	0	0
ptr_retrom01988	1	0	0	1	0	0
ptr_retrop03778	0	0	0	0	0	0
ptriretrom21606	4	10	2	5	0	2
ptriretrom04703	21	20	22	46	17	1
ptriretrom13894	3	0	1	9	0	0
ptr_retrom09289	0	0	0	0	0	0
ptr_retrop07136	55	30	17	23	1	0
ptriretrom16603	0	0	0	2	0	1
ptr_retrom10684	2	3	0	2	0	0
ptr_retrom10685	0	0	0	0	0	0
ptriretrom19957	0	0	0	0	0	2
ptr_retrop00666	0	0	0	0	0	0
ptriretrop13112	22	31	23	30	26	16
ptriretrom38272	17	38	24	30	12	6
ptriretrop04275	102	99	56	319	35	57
ptriretrop26260	0	0	0	0	0	0
ptr_retrop01735	0	0	0	0	0	0
ptriretrom28380	66	101	150	165	97	101
ptriretrop38064	1991	2070	1500	3438	1718	488
ptriretrom30014	0	0	0	0	0	0
ptr_retrom03002	3	0	1	0	1	0
ptriretrop36773	0	0	0	1	0	0
ptr_retrom08837	5	4	4	4	3	0
ptr_retrom03004	3	2	2	4	1	5
ptr_retrom07073	0	0	0	0	0	0
ptr_retrom03009	0	0	0	2	0	5
ptr_retrom07077	0	0	0	0	0	0
ptriretrop07745	1	0	0	0	0	0
ptr_retrom02500	49	1	60	6	1	3
ptriretrop34557	3	5	0	1	0	12
ptriretrop20845	0	0	0	1	0	0
ptr_retrom11004	1	0	0	2	0	0
ptr_retrop07121	0	0	0	0	0	0
ptriretrop26439	4	1	0	3	0	0
ptr_retrom11002	381	197	96	211	123	36
ptr_retrom10536	0	6	2	1	0	3
ptr_retrom10533	1	0	0	1	0	1
ptr_retrom10530	4	2	0	15	2	0
ptr_retrom01857	109	111	14	55	29	11
ptr_retrom01854	0	0	0	0	0	0
ptr_retrom01852	42	9	9	54	60	0
ptr_retrom10538	1	4	2	0	0	0
ptr_retrom01850	0	0	0	0	0	0
ptr_retrop06968	3391	3029	2368	2264	1138	264
ptr_retrom01647	0	0	0	0	0	0
ptriretrop24115	0	0	0	0	0	1
ptriretrom11560	1	1	1	1	0	0
ptriretrop24032	0	0	2	0	1	0
ptr_retrom07759	0	0	0	0	0	0
ptr_retrom04823	5	0	0	0	0	0
ptriretrop24527	203	196	246	457	195	105
ptriretrom34442	0	0	1	0	0	0
ptr_retrop08746	10	7	3	13	7	3
ptriretrop11244	1	0	0	0	0	1
ptr_retrop10149	6	2	1	2	0	2
ptr_retrop09736	0	0	0	0	0	0
ptr_retrom03174	1	0	0	0	0	0
ptriretrop12997	0	0	0	0	0	0
ptriretrop40036	0	0	0	1	1	1
ptriretrop14867	151	212	196	128	63	65
ptr_retrop01606	0	0	0	0	0	0
ptriretrop27052	0	0	0	0	0	0
ptr_retrom07106	0	2	0	1	0	2
ptr_retrom07105	0	0	0	1	0	0
ptr_retrom07103	0	0	0	0	0	0
ptriretrop08528	0	0	0	0	0	0
ptriretrop09832	0	0	0	0	0	0
ptr_retrom02787	1	0	0	0	0	1
ptriretrom38906	2	0	0	17	0	0
ptr_retrom07109	1	1	3	1	1	0
ptr_retrop03093	1	0	0	1	0	2
ptr_retrop06802	0	0	0	0	0	0
ptr_retrop04072	0	0	0	0	0	0
ptr_retrom07497	23	21	3	4	2	11
ptr_retrop04077	17	7	8	10	0	1
ptr_retrop04079	0	0	0	0	0	0
ptriretrom17469	0	0	0	0	0	0
ptriretrom36775	0	0	0	0	0	0
ptriretrom32334	9	0	4	9	0	1
ptr_retrop07649	0	0	0	0	0	0
ptr_retrop05383	18	34	6	24	5	11
ptr_retrop05385	3	3	0	1	0	0
ptriretrop26436	0	1	0	1	0	0
ptriretrop05056	41	75	9	10	1	19
ptr_retrom04414	5	5	6	4	13	3
ptriretrop13900	71	61	47	231	45	10
ptriretrop35859	0	0	0	0	0	0
ptr_retrop02586	0	1	0	2	0	0
ptriretrom07922	0	0	0	0	0	0
ptr_retrop06804	10	11	19	21	4	67
ptriretrom30334	0	0	1	1	0	0
ptriretrom34535	0	0	0	0	0	0
ptriretrom35008	393	467	451	300	200	1003
ptr_retrom02751	0	0	0	1	0	0
ptriretrop14262	0	0	0	0	0	17
ptr_retrop09773	11	0	0	0	0	1
ptr_retrop09772	1	0	0	0	0	0
ptr_retrop05256	0	0	0	1	0	0
ptr_retrop09774	0	1	0	0	0	0
ptr_retrom02757	2	1	6	2	2	6367
ptr_retrop05255	0	0	0	0	0	2
ptr_retrom02759	0	0	0	0	0	0
ptr_retrom02629	56	5	5	9	3	1
ptriretrop33073	809	234	268	1022	369	89
ptr_retrop08604	0	0	0	0	1	0
ptr_retrop08605	0	0	0	12	1	0
ptriretrom24729	0	0	0	0	0	0
ptr_retrop08198	1	1	0	0	0	2
ptriretrop30855	0	0	1	0	0	0
ptriretrop04182	0	0	0	0	0	5
ptriretrom17267	15	5	2	9	0	1
ptr_retrom06432	0	0	0	0	0	2
ptr_retrom06434	0	0	0	0	1	0
ptriretrom31889	0	0	0	0	0	0
ptriretrop42170	1375	1221	922	1677	896	279
ptriretrom11637	0	0	0	0	0	2
ptriretrom14283	1	0	0	0	0	0
ptriretrop25346	0	0	0	0	0	0
ptriretrop21617	8	5	2	12	8	2
ptriretrom19393	5	2	0	0	3	0
ptr_retrop02072	0	0	0	0	0	6
ptr_retrop06854	0	0	0	0	0	0
ptriretrop39930	14	34	6	12	10	1
ptr_retrop09480	1723	805	4	14	2	52
ptr_retrop09486	5	2	0	0	0	0
ptr_retrop09484	1	0	0	1	1	0
ptriretrom32470	21	12	61	77	37	11
ptr_retrom08931	0	0	1	0	0	0
ptr_retrom05638	0	0	0	0	0	0
ptr_retrop08363	182	9	6	12	13	18
ptriretrom42117	0	0	0	0	0	0
ptriretrom42116	1	1	1	3	0	0
ptriretrop25370	0	0	0	0	0	0
ptr_retrom02070	0	0	0	0	0	0
ptriretrop21509	1	1	1	5	1	1
ptr_retrom05636	1	0	0	0	0	0
ptr_retrom05634	2	3	1	1	0	0
ptr_retrom03757	0	2	1	0	6	0
ptr_retrop08774	2	0	3	4	0	2
ptr_retrop08775	0	0	0	0	0	0
ptr_retrop08773	0	0	0	0	0	0
ptr_retrop08770	1	0	0	0	0	0
ptr_retrop08771	3	1	1	0	1	3
ptriretrop42886	0	1	1	0	1	7
ptr_retrop05653	3	2	1	1	1	4
ptr_retrom10996	239	235	69	97	69	97
ptr_retrop05651	5	5	3	1	0	176
ptr_retrop05726	13	7	0	3	0	0
ptr_retrom09988	0	0	0	0	0	3
ptr_retrom09327	5	3	12	10	6	19
ptriretrom31873	0	0	0	0	0	0
ptr_retrop05722	0	0	2	0	0	0
ptr_retrom06729	0	0	0	0	0	0
ptr_retrop05720	73	64	28	42	38	1893
ptr_retrop06278	0	0	0	0	0	1
ptr_retrom09981	8	5	71	44	31	3
ptr_retrom06725	0	0	1	0	0	0
ptr_retrom09983	0	0	0	0	0	0
ptr_retrop07244	39	13	13	34	11	1
ptriretrom33465	0	0	0	0	0	2
ptr_retrop02382	1	1	0	6	1	0
ptriretrop40235	0	0	0	0	0	0
ptr_retrom08945	0	0	0	1	0	0
ptriretrop07307	2	0	0	0	0	36
ptr_retrom04907	22	2	3	6	0	1
ptr_retrom10202	0	0	0	3	0	0
ptriretrop31607	3	2	2	4	11	6
ptr_retrom10205	38	40	25	47	13	3
ptr_retrom10206	0	2	1	0	1	14
ptr_retrom10209	7	6	1	3	1	4
ptriretrom08558	0	1	1	2	0	2
ptriretrop25438	699	549	646	1659	646	121
ptr_retrop02701	731	593	684	663	2481	133
ptr_retrop06960	0	0	0	0	0	0
ptriretrom08870	46	86	6	58	25	9
ptriretrop34949	5	0	1	0	1	1
ptriretrom08004	1	2	0	4	7	0
ptriretrop20471	1	0	0	0	0	0
ptriretrop40764	3	3	5	6	3	1
ptr_retrop05036	0	0	0	0	0	0
ptriretrop40762	0	0	0	0	0	2
ptr_retrop05034	18	4	3	0	2	0
ptr_retrop02569	0	0	0	41	0	6
ptriretrom14867	0	0	0	0	0	0
ptr_retrop06892	2	7	1	15	3	2
ptr_retrom09146	1	5	2	2	2	1
ptr_retrop06600	0	0	0	0	0	0
ptr_retrom09184	0	0	0	0	0	0
ptriretrom14860	0	0	0	0	0	0
ptr_retrom08451	0	0	0	1	0	0
ptriretrop20307	3	0	0	1	0	0
ptriretrom26435	0	0	0	0	0	0
ptr_retrom05165	0	0	0	2	0	0
ptr_retrom05164	0	0	0	0	0	0
ptr_retrop02565	0	0	0	0	0	0
ptr_retrom05162	8	3	4	4	0	1
ptr_retrom05161	1	0	1	1	0	0
ptr_retrop09952	0	0	0	0	0	0
ptr_retrop08407	0	0	1	0	0	2
ptr_retrop10469	0	0	0	0	0	0
ptr_retrom07672	1	0	0	0	0	0
ptriretrop43223	3	1	0	9	0	0
ptriretrom33163	0	0	0	0	0	0
ptriretrom29010	28	20	39	71	35	5
ptr_retrop10463	1	0	0	0	0	0
ptriretrom21619	5	10	2	3	1	0
ptr_retrop10461	1	0	0	2	0	0
ptr_retrop06847	0	0	0	0	0	0
ptr_retrop10467	4	0	0	0	1	4
ptriretrop32005	8	4	0	6	1	0
ptriretrop17768	0	0	0	1	0	0
ptr_retrom04348	1	1	0	1	0	0
ptr_retrop06674	1	0	0	0	0	1
ptr_retrom01451	7	7	1	4	1	3
ptriretrop36012	1	0	1	1	0	0
ptr_retrom01454	0	0	0	0	0	0
ptr_retrom04340	1	0	0	1	0	3
ptr_retrop06933	0	0	0	0	0	0
ptr_retrop06931	0	1	0	3	1	0
ptr_retrop06936	1	0	0	0	0	0
ptr_retrop06937	0	0	0	0	0	37
ptr_retrom04346	1	0	0	0	0	2
ptr_retrom05563	4	2	2	1	2	1
ptr_retrom05561	0	0	0	0	0	0
ptr_retrom06944	0	0	0	0	2	0
ptr_retrop11420	0	0	0	0	0	2
ptriretrom15646	0	0	0	0	1	0
ptriretrom14265	1	1	1	1	2	2
ptr_retrom05569	0	0	0	0	0	0
ptriretrom14267	0	0	0	0	2	3
ptriretrop15615	0	0	0	0	0	6
ptriretrom28135	3	3	0	0	2	1
ptr_retrop02145	0	0	0	0	0	0
ptr_retrop06117	12	10	2	6	4	0
ptr_retrom08876	1	0	0	0	0	0
ptr_retrop05289	0	0	0	0	0	0
ptr_retrop07645	0	0	0	0	0	0
ptr_retrop07644	0	0	0	0	0	0
ptr_retrom04164	4	2	1	0	1	1
ptr_retrom04165	2	1	1	2	1	2
ptr_retrom08870	0	0	0	0	0	1
ptr_retrop07640	1	0	0	1	0	4
ptriretrop16360	0	3	3	12	2	233
ptr_retrop07255	142	154	95	315	122	46
ptr_retrom06858	0	0	0	0	0	1
ptr_retrop09857	1	0	0	0	0	0
ptriretrop31752	2	3	1	6	2	0
ptriretrom34205	0	1	0	0	0	0
ptr_retrom07585	10	17	1	7	3	0
ptr_retrom08879	5	6	1	2	0	24
ptr_retrop06730	2	1	0	0	0	175
ptr_retrop10222	2	1	0	1	1	0
ptriretrop17101	0	0	0	1	64	0
ptr_retrop02897	0	2	0	0	0	5
ptr_retrop09859	3	7	0	3	1	1
ptriretrop35447	10	3	7	20	5	6
ptriretrop35045	0	0	0	1	0	0
ptr_retrom09501	4	6	1	3	3	1
ptr_retrom09500	0	0	0	1	0	1
ptriretrom08058	0	0	0	0	0	0
ptr_retrom10050	2	0	1	0	0	0
ptr_retrom10053	9	11	6	13	2	2
ptr_retrom10055	0	1	0	0	0	1
ptr_retrop05823	5	3	1	14	9	3
ptr_retrop05891	7	30	10	12	4	1
ptriretrom22431	1	2	0	2	0	0
ptriretrom37001	0	0	0	0	0	11
ptriretrom31067	0	8	0	1	1	0
ptr_retrop08387	18215	14544	42186	82704	40189	2354
ptriretrom41581	568	826	576	834	356	4961
ptr_retrom08909	0	0	0	0	0	0
ptr_retrom01812	1	0	0	0	0	0
ptr_retrom08902	0	0	0	0	0	0
ptr_retrom08903	0	0	0	0	0	0
ptriretrom08906	1	1	1	0	0	0
ptr_retrom08907	320	270	818	1309	702	20
ptr_retrop07463	5	6	0	0	0	0
ptr_retrop07393	0	0	0	0	0	0
ptr_retrop07392	1	0	0	0	0	0
ptriretrom35377	0	0	0	1	0	0
ptriretrom30415	3	0	0	3	0	4
ptr_retrop07397	0	0	0	0	0	0
ptriretrom42494	0	0	0	0	0	0
ptriretrom11605	10	1	0	26	0	0
ptriretrop40817	4	3	2	2	2	1
ptr_retrom08585	0	0	0	0	0	0
ptr_retrop10282	0	1	0	3	6	2
ptr_retrop06659	53	25	4	19	6	0
ptr_retrop05828	0	0	0	0	0	0
ptriretrom21569	18	2	6	11	0	5
ptriretrom12311	0	0	0	0	0	0
ptr_retrop03162	0	0	0	0	0	0
ptr_retrop03163	0	0	0	0	0	10
ptr_retrop02965	0	1	0	1	0	73
ptr_retrop02966	0	1	0	1	0	0
ptriretrop06224	1	0	0	1	1	3
ptriretrom30532	0	0	0	0	0	0
ptr_retrop06463	1	0	0	0	0	0
ptriretrop25996	0	0	0	2	0	12
ptriretrom30536	4	4	0	0	0	0
ptriretrop03535	0	0	0	0	0	7
ptr_retrom06986	0	0	0	0	0	0
ptriretrop17588	1	0	0	1	0	0
ptriretrop43046	1	1	2	0	0	0
ptriretrop38723	4	0	1	1	0	0
ptr_retrom07455	0	0	0	0	0	0
ptr_retrom07454	0	0	0	0	0	4
ptr_retrom07456	0	0	0	0	0	4
ptriretrop16699	2	1	0	0	0	1
ptriretrop19989	1043	831	1006	2585	846	247
ptriretrom22093	578	466	376	617	177	168
ptriretrop06868	0	1	0	0	0	0
ptriretrop36943	1009	1154	1091	1505	859	541
ptriretrom21599	5	4	3	7	2	3
ptr_retrom08877	0	0	1	1	0	0
ptriretrop34526	0	1	0	0	0	0
ptriretrom29976	0	0	0	0	0	0
ptriretrop19560	1	1	3	1	0	0
ptriretrom28227	3	24	2	5	6	776
ptriretrop19565	0	1	0	0	0	0
ptriretrop39410	0	0	0	1	0	0
ptriretrom22941	2	0	0	2	1	0
ptriretrop39417	3	4	0	1	0	1
ptriretrom33136	0	0	1	0	0	0
ptr_retrop10849	1	1	0	0	0	1
ptr_retrop10848	0	0	1	5	0	1
ptriretrop17800	4	2	0	0	0	0
ptr_retrop10515	322	205	61	254	59	6
ptriretrop10750	2	0	1	0	0	0
ptr_retrop10841	4	3	0	16	0	1
ptr_retrop10840	6	2	2	4	1	4
ptr_retrom11124	4	1	0	0	0	0
ptr_retrom08897	2	0	0	1	0	3
ptr_retrom08476	1	0	2	0	3	0
ptriretrom33921	25	29	12	21	5	14
ptr_retrom11120	1	2	5	10	4	0
ptr_retrom08475	2	0	0	0	0	1
ptriretrop12539	162	72	77	1171	2973	7
ptr_retrop03763	1	0	0	3	1	0
ptr_retrop03764	3	0	0	0	0	1
ptriretrop05808	0	0	0	0	0	0
ptriretrom26882	1450	1073	890	2036	508	596
ptr_retrop09749	0	0	1	0	0	0
ptr_retrom10260	1	0	0	0	0	2
ptr_retrom00919	8	21	5	6	3	3
ptriretrom33298	1	0	0	1	1	1
ptr_retrop09495	0	4	0	4	13	1
ptriretrom16631	30	31	45	87	14	9
ptr_retrom07010	0	0	0	0	0	0
ptr_retrom05397	1	0	1	2	0	13
ptr_retrop09496	0	0	0	0	0	0
ptriretrom41121	155	100	221	266	148	186
ptr_retrom05390	20	6	4	17	5	10
ptriretrop39702	0	0	0	0	0	0
ptriretrop18764	3	9	3	0	0	2
ptriretrom04910	0	0	0	0	0	0
ptr_retrop05923	0	0	0	0	0	30
ptriretrom36972	3	0	1	0	0	0
ptr_retrop01724	0	0	0	0	0	0
ptriretrop20879	0	0	0	0	0	0
ptr_retrom02538	210	159	53	140	8	57
ptriretrop19169	0	0	0	0	0	1
ptr_retrom05254	1	1	0	0	1	0
ptr_retrom02535	17	3	2	1	0	1
ptr_retrom02537	10	4	1	6	0	3
ptr_retrop06651	8	5	2	6	5	4
ptr_retrom07067	141	36	78	113	35	3
ptriretrop30398	1	0	0	0	0	0
ptr_retrop06034	0	1	1	1	0	0
ptr_retrop03618	0	0	0	0	0	0
ptr_retrop02321	95	129	51	64	41	23
ptriretrop40369	0	0	0	0	0	0
ptr_retrom11016	8	5	2	3	1	4
ptr_retrop06696	0	0	0	0	0	0
ptriretrom04598	1123	1588	0	16	6	7
ptr_retrom10543	1	0	0	1	0	0
ptr_retrom05620	0	5	0	0	0	0
ptr_retrom10541	1	2	1	0	3	0
ptr_retrom10540	3	5	2	9	3	2
ptriretrop35154	0	0	0	0	0	1
ptr_retrom05253	7	3	1	3	6	0
ptriretrop14802	1	0	0	0	0	0
ptr_retrop01621	0	0	0	0	0	0
ptr_retrom01845	2	0	1	0	0	3
ptr_retrom10549	1	2	2	0	0	0
ptr_retrom10548	1	2	0	2	2	1
ptr_retrom06105	824	642	632	608	226	94
ptriretrom25284	0	0	0	0	0	0
ptr_retrom01843	2	1	0	0	0	0
ptriretrom11550	0	0	0	1	0	0
ptriretrom41878	0	0	0	0	0	0
ptriretrop36742	1	0	0	0	0	0
ptriretrop04460	1	1	0	2	0	0
ptr_retrop08432	4	2	1	1	0	0
ptr_retrop09960	4	0	2	1	0	0
ptriretrop13874	9	0	0	0	0	1
ptriretrom13772	96	47	101	70	118	67
ptr_retrom03109	30	33	5	50	5	2
ptr_retrom03108	0	0	0	0	0	0
ptr_retrom05626	0	0	0	0	0	0
ptriretrop31922	0	0	0	1	0	11
ptr_retrom04128	5	9	7	2	5	4
ptr_retrop08561	0	1	0	0	0	0
ptr_retrom03100	2	3	1	1	6	0
ptr_retrom03107	1	0	0	0	0	0
ptriretrop40025	3	0	0	1	0	0
ptr_retrop09674	0	0	0	0	0	0
ptr_retrop08564	5	6	0	1	0	2
ptr_retrom07115	0	0	0	0	0	0
ptriretrom28147	0	0	1	0	0	0
ptr_retrop06852	1	3	1	1	0	0
ptr_retrom06381	21	15	10	18	4	7
ptr_retrom07112	1	1	0	1	1	0
ptr_retrop03923	0	0	0	0	0	0
ptriretrop15057	12	6	0	3	0	12
ptriretrom07730	0	0	0	0	0	0
ptr_retrom06819	0	0	0	0	0	0
ptr_retrom07118	0	0	0	0	0	0
ptriretrom38911	2	1	0	3	3	0
ptr_retrop04060	0	0	0	0	0	0
ptr_retrom02036	4	1	0	1	0	0
ptr_retrom06816	0	0	1	0	0	0
ptr_retrom06107	1	1	0	1	1	1
ptr_retrop08669	0	3	0	0	0	1
ptr_retrom02513	0	0	0	0	0	0
ptriretrop28100	0	0	0	0	0	0
ptr_retrom06812	301	137	424	1281	633	790
ptriretrom25932	2	0	0	0	0	0
ptr_retrop08704	1	3	3	5	10	4
ptriretrom28811	1	0	4	3	1	18
ptriretrop26967	0	0	1	1	0	0
ptriretrom07930	0	0	0	0	0	2
ptriretrop29383	7246	5879	4911	11941	6533	3128
ptriretrop40791	1	1	0	0	0	0
ptr_retrop04892	4	13	2	23	0	2
ptriretrom07938	0	0	0	0	0	0
ptr_retrop09767	31	34	10	14	10	8
ptr_retrom02744	0	0	0	1	0	0
ptr_retrom02742	0	0	0	0	0	1
ptr_retrop09763	1	1	2	0	1	0
ptriretrop18012	0	0	0	0	0	0
ptriretrom23931	1	0	0	0	0	0
ptriretrom28766	0	0	0	0	0	0
ptriretrop14272	6	12	18	21	6	1
ptr_retrop08843	1	1	0	0	0	0
ptriretrop33060	1	0	0	0	0	0
ptr_retrop08362	7	0	1	2	0	0
ptr_retrop08660	1	0	0	0	0	0
ptriretrom34837	0	0	0	0	0	0
ptriretrop07550	0	0	0	0	0	0
ptriretrop12804	3	1	0	0	0	0
ptr_retrop07034	0	0	0	0	0	0
ptriretrom29550	0	0	0	0	0	1
ptriretrop11030	0	0	0	0	0	0
ptr_retrop09677	8	9	5	8	5	4
ptr_retrop06778	0	0	1	2	0	0
ptriretrom25424	24	5	0	0	0	1
ptr_retrop07686	0	0	0	0	0	0
ptr_retrop05537	0	0	0	1	0	0
ptr_retrom09996	0	0	0	0	0	0
ptr_retrop05532	15	3	40	48	8	3
ptr_retrop05531	62	33	151	248	70	37
ptriretrom23018	1	2	4	0	2	0
ptr_retrop05281	0	0	0	1	0	0
ptr_retrom02039	0	0	1	1	1	0
ptr_retrop08412	9	2	1	1	3	7
ptr_retrom08710	0	0	0	0	0	4
ptr_retrop05285	16	15	0	1	0	0
ptr_retrom09330	0	1	0	0	0	0
ptr_retrop05538	1	1	3	1	0	0
ptriretrop14115	8	0	1	1	0	1
ptr_retrop09499	1	2	0	0	2	0
ptriretrop37374	2	1	0	1	1	7
ptriretrom20831	2	9	0	7	1	1
ptriretrop10106	231	249	243	716	220	55
ptriretrop42921	0	2	2	1	1	0
ptr_retrom09424	2	0	0	0	0	0
ptr_retrop09493	0	0	0	0	0	0
ptriretrom32463	10	10	1	4	0	0
ptriretrop15420	1	0	0	1	0	0
ptr_retrop02014	2	1	0	0	0	0
ptriretrom19546	1	1	0	1	0	1
ptr_retrom05629	13	6	4	11	5	5
ptr_retrom06083	5	1	1	5	2	0
ptr_retrom05999	3	5	3	0	0	0
ptr_retrom06085	0	0	0	2	0	0
ptr_retrom05992	9	0	1	4	4	0
ptriretrom27784	0	0	0	0	0	0
ptr_retrom05622	0	1	0	0	1	0
ptr_retrom05994	28	16	86	73	12	1
ptr_retrom03722	0	0	3	0	0	0
ptr_retrop08700	3	1	0	3	0	2
ptr_retrom03726	0	5	0	4	2	0
ptr_retrom03724	0	0	0	0	1	1
ptriretrom34490	31	28	17	140	128	273
ptr_retrom06958	9	4	9	10	5	2
ptriretrom25781	20	9	3	12	5	0
ptr_retrop06097	0	0	0	0	1	1
ptr_retrop05753	276	152	290	408	488	28
ptr_retrom09333	0	0	0	0	0	0
ptr_retrom09994	0	1	1	0	0	0
ptr_retrom09331	0	1	1	3	0	0
ptriretrop24479	309	259	167	342	145	161
ptr_retrom09337	0	1	0	1	1	0
ptr_retrom07421	0	2	0	0	4	1
ptr_retrom06711	0	0	0	0	0	0
ptr_retrop02393	0	0	0	0	0	0
ptr_retrom09339	16	4	25	38	44	1
ptr_retrom06715	4	5	14	54	21	2
ptr_retrom09998	0	0	0	0	0	0
ptr_retrom01901	0	0	0	0	0	0
ptriretrop36156	0	0	0	0	0	0
ptr_retrom06717	3	0	0	0	1	0
ptr_retrop07602	2	0	0	0	0	1
ptriretrop09466	0	0	0	0	0	0
ptriretrop35621	0	0	0	1	0	0
ptriretrom22677	249	100	21	41	16	621
ptriretrom28213	0	0	0	0	0	0
ptriretrop14063	0	1	1	0	0	0
ptr_retrom05196	0	2	1	7	0	0
ptr_retrop11428	0	0	0	0	0	0
ptriretrom41726	0	0	0	0	0	1
ptr_retrom05199	0	0	0	0	0	0
ptr_retrop02712	0	0	0	0	0	0
ptr_retrop02710	0	0	0	0	0	0
ptr_retrop06736	2	0	0	0	0	0
ptriretrop29277	2	0	0	3	0	0
ptriretrom08845	3	1	0	2	1	0
ptr_retrom01907	0	0	0	0	0	1
ptr_retrom03439	0	1	1	1	0	0
ptr_retrom03436	10	15	6	6	1	3
ptr_retrom03433	0	0	0	2	0	0
ptr_retrom03432	0	0	0	2	0	0
ptr_retrom03430	9	7	2	18	5	1
ptr_retrop02576	0	0	0	0	0	0
ptriretrop17573	56	26	5	50	19	16
ptr_retrop09949	7	5	22	11	8	5
ptr_retrom05178	0	0	0	0	0	0
ptriretrop10966	0	0	0	0	0	0
ptr_retrom05174	0	0	0	0	0	0
ptr_retrom09427	2	0	0	6	0	1
ptr_retrom05176	1	0	1	0	0	0
ptr_retrom04488	0	0	0	0	0	0
ptr_retrom05170	3	0	1	0	0	1
ptr_retrom07663	2	3	0	7	0	4
ptr_retrop02578	0	0	0	1	1	14
ptr_retrom05173	0	0	0	0	0	0
ptriretrop32018	14	8	7	19	16	4
ptr_retrop02087	55	7	3	14	5	2
ptr_retrop07600	0	0	0	0	0	0
[truncated: 2,877 more rows]

## Sheet: Gorilla
# Supplemental Table S2: Retrocopy expression (≥1 unique read) in gorilla
# The number of unique reads refers to those mapped in all samples from the same organ
# The number of unique reads mapping on each retrocopy locus (as defined in Supplemental Table S1) was obtained using the CoverageBed function from the Bedtools suite.
retro_ID	Brain	Cerebellum	Heart	Kidney	Liver	Testis
ggo_retrop00258	0	0	0	0	2	1
ggoiretrop24559	60	64	98	6	15	165
ggo_retrop02558	0	0	0	0	0	0
ggoiretrom24270	6	6	0	5	6	8
ggo_retrop00253	1	7	0	9	6	44
ggo_retrop00250	114	44	6	45	38	122
ggo_retrom02786	10	23	3	13	14	11
ggo_retrop00256	3	0	0	0	0	2
ggo_retrop00257	0	0	0	0	0	0
ggo_retrop00254	0	1	0	0	0	3
ggoiretrop25676	3	0	0	0	1	0
ggo_retrom04376	0	0	0	0	0	0
ggo_retrom02484	44	26	17	46	25	201
ggo_retrom03423	8	4	15	15	13	2
ggo_retrom03420	0	0	0	0	0	2
ggo_retrop04315	1	2	0	4	2	0
ggo_retrom04374	3	7	2	6	5	35
ggoiretrop33763	0	0	0	0	0	0
ggo_retrop01673	0	0	0	0	0	0
ggo_retrop01672	0	0	0	0	0	0
ggo_retrop01671	0	0	0	0	0	1
ggo_retrom04375	0	0	0	0	1	0
ggoiretrop02792	2	1	1	2	4	19
ggo_retrop01675	0	0	0	0	0	0
ggo_retrom00760	16	18	11	13	23	161
ggo_retrom00762	3	3	1	6	6	5
ggo_retrom00764	0	0	0	0	0	0
ggoiretrop29610	0	0	0	0	0	2
ggoiretrop28995	0	0	0	0	0	2
ggoiretrom27671	13	0	2	6	6	11
ggoiretrop18775	0	0	0	0	0	2
ggo_retrom03102	0	0	0	0	0	0
ggo_retrom04194	0	0	0	0	0	1
ggoiretrop18771	0	0	1	2	2	8
ggoiretrop22100	4	1	1	2	8	1
ggoiretrop22102	1	0	0	0	0	115
ggo_retrop00251	5	0	0	22	1	4
ggoiretrom10175	0	0	0	0	0	0
ggo_retrom02860	4	9	3	9	3	1
ggoiretrom21284	1	0	0	1	2	6
ggo_retrom02862	0	0	0	0	0	0
ggo_retrom02864	0	0	0	1	0	0
ggoiretrop11496	20	14	2	18	10	50
ggo_retrom02867	6	4	1	14	10	9
ggo_retrop00495	0	0	0	0	1	1
ggo_retrop00496	0	0	1	0	0	1819
ggo_retrom01369	4	3	2	3	1	9
ggoiretrop22294	515	196	72	685	796	1714
ggoiretrop25743	0	0	0	0	0	12
ggo_retrop03663	0	0	0	0	1	14
ggo_retrom01363	0	0	0	0	0	0
ggoiretrop26590	0	0	0	0	0	4
ggo_retrop00498	450	308	110	420	322	943
ggo_retrom04626	0	0	0	0	2	7
ggoiretrop10701	1	0	1	1	0	1816
ggo_retrop00652	0	0	0	4	12	0
ggo_retrop00653	1	0	1	1	1	1
ggo_retrop00650	0	0	0	0	0	0
ggo_retrop01708	6	6	5	9	7	13
ggo_retrom04044	27	27	5	16	21	27
ggo_retrom04620	9	10	7	14	10	79
ggo_retrop00234	5	7	4	3	2	3
ggo_retrom04047	23	10	2	1	2	15
ggo_retrom01560	0	0	0	0	1	1
ggo_retrom04041	0	0	0	0	2	0
ggo_retrom04042	1	3	1	0	0	2
ggo_retrop00659	0	0	0	0	0	1
ggo_retrom03071	0	1	1	0	0	7
ggo_retrom02612	15	16	8	17	34	84
ggo_retrom02972	4	1	0	0	0	1
ggoiretrop27261	68	64	17	65	27	378
ggoiretrop23217	0	0	0	1	1	0
ggoiretrop23216	1144	1296	801	2968	3114	3825
ggoiretrop28867	8	2	5	10	3	83
ggo_retrom02665	1	1	0	0	1	1
ggoiretrom28399	0	0	0	0	0	0
ggoiretrop27519	0	0	0	0	1	2
ggoiretrom11846	1	1	0	2	1	1
ggo_retrop01324	0	0	0	0	0	15
ggoiretrop12848	42	12	1	28	16	94
ggoiretrop12849	5	2	1	0	7	6
ggo_retrom00419	1	1	1	7	16	9
ggoiretrop27512	0	0	0	0	0	2
ggoiretrop08024	0	0	0	0	1	1
ggoiretrom29910	3	16	3	11	14	21
ggo_retrom02915	5	3	5	7	41	34
ggoiretrop09044	72	96	43	127	56	571
ggoiretrop35680	2	3	1	6	10	8
ggo_retrom02910	2	0	0	0	1	3
ggo_retrop04305	0	2	0	0	4	1
ggo_retrom00351	0	1	0	0	0	0
ggo_retrom00352	0	2	0	0	0	1
ggoiretrom21195	1	0	1	0	0	20
ggo_retrom00355	0	0	0	0	6	2
ggoiretrop33012	431	101	40	153	191	272
ggoiretrop28145	13	9	3	29	15	86
ggo_retrom03870	7	0	4	0	0	2
ggoiretrom25838	1	5	1	4	4	2
ggo_retrop04307	0	0	0	0	0	0
ggoiretrop34916	1	1	0	0	0	2
ggoiretrop10018	0	0	0	0	0	3
ggo_retrom03889	0	0	0	1	0	6
ggo_retrom03888	0	1	0	0	0	1
ggoiretrom25383	0	0	0	0	0	2
ggo_retrom03872	5	5	0	0	1	7
ggo_retrom03426	7	4	1	4	2	7
ggo_retrom00413	1	0	1	0	0	5
ggoiretrop05222	0	0	2	0	0	1
ggo_retrom03282	0	0	0	0	0	0
ggoiretrom08268	97	54	25	41	20	828
ggo_retrom03424	1	0	0	0	1	4
ggo_retrom00558	0	0	0	0	0	0
ggoiretrop09196	0	2	0	0	0	0
ggo_retrom03875	0	0	0	0	0	0
ggo_retrop03280	0	0	0	0	0	0
ggo_retrop03282	0	0	0	0	0	1
ggo_retrom00559	1	1	0	0	0	0
ggoiretrop20980	2	3	0	1	2	2
ggoiretrom22540	96	132	3	47	80	112
ggoiretrop12937	1	0	0	1	0	55
ggo_retrom03378	0	0	0	0	0	0
ggo_retrop02931	0	0	0	0	0	0
ggo_retrom04459	1	0	0	2	2	1
ggo_retrom04458	3	3	2	0	1	351
ggoiretrom04709	0	0	0	0	0	0
ggo_retrom04453	0	0	0	0	0	0
ggo_retrom01172	0	0	0	0	0	0
ggo_retrom01170	0	1	0	0	0	4
ggoiretrom05658	10	1	0	0	0	3
ggo_retrom01176	0	1	0	0	0	1
ggo_retrom01175	0	0	0	0	15	7
ggoiretrom10404	0	0	0	0	0	21
ggo_retrom02600	0	0	0	0	0	2
ggo_retrop03353	1	0	0	0	0	0
ggo_retrom02602	0	0	0	0	0	1
ggo_retrom00991	2	2	3	2	1	8
ggo_retrom00997	1	4	0	1	1	2
ggo_retrom00994	7	0	0	2	0	0
ggo_retrom02607	157	117	32	185	152	496
ggo_retrom02608	0	0	0	0	0	1
ggo_retrom04297	0	0	0	5	2	2
ggoiretrop36995	0	0	0	0	0	1
ggo_retrom04291	0	1	0	0	0	144
ggo_retrom04290	0	0	0	0	0	2
ggoiretrop33990	0	0	0	0	0	0
ggo_retrom04292	0	2	0	0	0	19
ggo_retrom00048	0	0	0	0	1	1
ggoiretrom24971	4	8	2	8	5	102
ggoiretrop30870	1	4	1	1	1	12
ggoiretrop21585	0	0	0	0	0	1
ggo_retrom00283	0	2	0	3	3	56
ggoiretrom33143	4	0	1	0	0	69
ggoiretrop05357	2	0	0	0	0	0
ggo_retrom03666	1	4	1	1	1	11
ggoiretrop21588	0	1	1	5	3	1
ggo_retrom03955	55	20	5	27	21	45
ggo_retrom03954	2	2	0	0	0	2
ggo_retrom03953	1	0	0	3	0	19
ggoiretrom12462	0	0	0	0	0	0
ggo_retrom03951	0	0	0	0	0	2
ggoiretrop00306	0	0	0	0	0	4
ggoiretrom03954	2	2	0	1	0	1
ggo_retrom00979	0	0	0	1	1	0
ggoiretrom05389	1	1	0	0	0	0
ggo_retrom00976	0	2	0	1	1	1
ggo_retrop02910	0	0	1	1	0	0
ggo_retrop03915	0	1	1	1	3	6
ggo_retrop03916	0	1	0	0	0	0
ggo_retrom00973	2	2	1	3	6	7
ggo_retrom04554	2	1	0	1	1	0
ggoiretrop08151	0	0	0	0	0	0
ggo_retrom00788	3	4	0	2	2	4
ggoiretrom21861	2	3	2	2	3	12
ggoiretrom11876	0	0	0	0	1	0
ggoiretrop12625	25	17	10	42	26	70
ggoiretrom10316	497	358	97	408	300	2594
ggo_retrop02536	5	13	0	43	3	80
ggo_retrom01003	0	0	0	0	1	1
ggo_retrop02533	1	1	0	1	3	2
ggo_retrom02734	0	0	0	0	0	7
ggo_retrom02736	1	1	1	0	0	3
ggo_retrom02737	0	0	0	0	0	1
ggoiretrom34699	0	1	0	0	0	3
ggo_retrom01009	0	0	0	0	0	2
ggo_retrom02733	0	0	0	1	1	2
ggo_retrop03833	0	0	0	0	0	1
ggo_retrom03090	0	0	0	0	0	0
ggoiretrom18077	1	0	2	2	2	6
ggo_retrop03759	43	29	6	23	33	571
ggo_retrop03756	2	0	1	1	6	8
ggo_retrop03757	0	0	0	0	0	2
ggo_retrop03754	0	0	0	0	2	0
ggo_retrop02761	0	0	0	0	0	0
ggo_retrop03938	0	0	0	0	0	0
ggo_retrop03626	514	451	219	271	461	655
ggo_retrop03627	0	0	0	0	2	3
ggo_retrom01668	0	1	0	0	0	0
ggo_retrop03830	0	0	0	0	0	8
ggo_retrop02089	4	3	2	0	2	1648
ggo_retrom01644	0	0	2	0	0	814
ggo_retrop04313	0	0	0	0	0	1
ggo_retrop03781	0	0	0	1	0	1
ggoiretrom32432	1	0	0	0	1	0
ggo_retrop03628	0	0	0	1	0	15
ggo_retrop03629	0	1	0	0	0	0
ggo_retrom04128	9	4	3	9	20	42
ggo_retrom01599	2	3	3	3	2	12
ggo_retrop03782	0	0	0	0	0	0
ggoiretrom22362	55	36	16	51	57	163
ggoiretrop20272	2	1	2	5	9	8
ggoiretrom05275	4	3	5	10	11	8
ggoiretrop12716	0	1	0	0	0	0
ggo_retrom04609	0	1	0	2	0	0
ggoiretrom23985	0	1	0	0	1	2
ggo_retrop00756	0	0	0	0	0	0
ggoiretrop12711	0	0	0	1	4	68
ggo_retrop02793	0	0	0	0	0	0
ggo_retrom04127	0	0	0	1	0	58
ggo_retrop04201	0	0	0	0	0	0
ggo_retrop04832	0	0	0	0	0	2
ggo_retrop04830	0	3	2	4	1	7
ggoiretrom28123	0	0	2	0	1	2
ggo_retrop03133	0	0	0	0	0	1
ggo_retrop03858	0	1	1	1	0	2
ggoiretrop20183	0	0	0	0	0	4
ggoiretrom20396	0	0	0	0	0	0
ggo_retrop02669	0	0	0	0	0	0
ggo_retrom01828	0	0	0	0	0	0
ggo_retrom00420	2	0	0	1	0	2
ggo_retrom00426	0	0	0	0	0	0
ggo_retrop02883	9	10	5	4	10	4
ggo_retrom01821	0	0	0	0	1	6
ggo_retrop02660	1	2	1	0	2	26
ggoiretrop34729	17	18	15	40	70	91
ggo_retrom01822	0	0	0	0	0	11
ggo_retrop02889	0	0	0	0	0	1
ggo_retrom01824	0	0	1	2	0	4
ggo_retrop02667	18	34	4	10	18	125
ggo_retrom01826	0	0	0	0	2	3
ggo_retrop02398	4	1	11	2	12	6
ggoiretrom13225	2	1	0	1	0	2
ggo_retrop03454	0	0	0	0	0	0
ggoiretrom11351	7	2	0	1	5	15
ggo_retrop02393	0	0	0	0	0	0
ggo_retrom01656	1	0	0	0	0	8
ggoiretrop24356	0	0	0	0	0	0
ggoiretrom26292	0	0	0	0	0	0
ggoiretrop18883	0	0	0	0	0	1
ggoiretrom24396	0	0	0	0	1	591
ggo_retrop01844	1	3	0	6	6	12
ggo_retrop01845	0	0	0	0	0	0
ggo_retrop01847	52	10	27	142	126	535
ggo_retrop02719	431	179	49	250	163	760
ggo_retrop01841	10	7	0	0	0	1
ggo_retrom04709	0	0	0	0	0	0
ggo_retrom04708	3	1	0	1	8	1
ggo_retrom04706	1	0	0	0	1	0
ggo_retrom04704	0	0	0	2	0	2
ggo_retrom04703	0	0	0	5	1	2
ggoiretrop29558	0	0	0	0	0	1
ggo_retrom01953	7	1	4	0	3	8
ggo_retrom04700	1	0	0	0	1	2
ggo_retrop04168	5	0	0	3	3	4
ggo_retrop04169	0	0	0	0	0	0
ggoiretrom06679	2	1	0	0	1	0
ggoiretrom16944	0	0	0	0	0	1
ggo_retrop04724	0	0	0	0	0	4
ggoiretrom09379	0	0	0	0	0	0
ggoiretrop25911	0	0	0	1	0	0
ggo_retrom00516	0	0	0	0	1	0
ggoiretrop09464	0	0	0	0	0	0
ggo_retrom00514	1	1	2	0	3	7
ggoiretrop35770	0	0	0	0	0	0
ggoiretrom06677	1	0	0	0	0	0
ggoiretrom09372	0	0	0	0	0	1
ggo_retrop02939	0	1	0	4	0	3
ggo_retrop01288	7	0	0	0	0	4
ggo_retrop01289	1	0	1	1	0	0
ggoiretrop13153	363	295	134	324	182	756
ggo_retrom04464	1	0	0	0	2	14
ggoiretrop08926	2	0	0	0	0	11
ggo_retrop01283	0	0	1	0	0	0
ggo_retrom01723	26	6	2	22	33	74
ggoiretrop08922	0	0	0	0	1	0
ggoiretrom02706	0	0	0	0	0	0
ggoiretrop23776	15	0	0	0	0	1
ggoiretrop07881	0	0	0	0	1	0
ggo_retrom03088	0	0	0	0	0	1
ggo_retrom03419	0	0	0	0	1	0
ggoiretrom24382	0	0	0	0	0	530
ggo_retrop01694	1	1	1	1	0	129
ggo_retrop02621	1	7	5	5	16	8
ggo_retrom02669	0	0	0	0	1	5
ggoiretrop38046	0	0	0	0	0	11
ggoiretrom28451	15	10	2	17	13	66
ggo_retrop01375	0	0	0	0	0	0
ggoiretrom26427	0	0	0	0	0	0
ggoiretrop29834	2	3	0	0	0	10
ggo_retrop04768	0	0	0	0	0	2
ggo_retrop04766	0	0	0	1	0	0
ggo_retrop04767	4	6	0	16	18	5
ggo_retrop04762	0	0	0	0	0	517
ggo_retrop02716	0	0	0	0	0	0
ggo_retrop04760	2	0	2	2	3	7
ggoiretrop03568	0	0	0	0	0	0
ggo_retrop04385	0	8	16	2	4	0
ggoiretrop02966	1	2	0	0	1	4
ggoiretrom19065	0	0	0	0	0	0
ggo_retrop04380	2	0	0	3	0	2
ggoiretrom00031	0	0	0	0	0	0
ggoiretrom30173	26	11	6	7	4	30
ggo_retrop00129	0	0	0	0	0	0
ggoiretrop02969	0	0	0	0	1	5
ggoiretrop33578	0	0	0	0	0	19
ggo_retrom01771	0	0	0	0	0	3
ggoiretrom06706	0	0	0	0	1	108
ggo_retrom00608	4	2	0	2	0	3
ggo_retrop04545	0	0	0	0	0	0
ggo_retrop04542	0	0	0	0	0	0
ggo_retrop04543	0	0	0	0	0	0
ggo_retrop04540	0	0	0	0	0	1
ggo_retrop04541	0	0	0	0	0	0
ggoiretrom30636	0	1	0	0	0	1
ggo_retrom00607	1	0	0	0	3	3
ggo_retrop01068	4	13	3	4	6	13
ggo_retrop04549	1	1	0	1	1	3
ggo_retrom03552	3	0	2	1	0	2
ggoiretrop08819	0	0	0	0	0	1
ggo_retrop01696	0	0	0	0	1	0
ggo_retrom03555	1	0	0	0	0	2
ggo_retrom04382	0	0	0	0	0	0
ggo_retrop02867	0	0	0	0	0	1
ggo_retrom01366	0	6	4	5	2	4
ggo_retrop02865	0	0	0	0	0	1
ggo_retrom03558	0	0	0	0	0	0
ggo_retrop02863	0	0	0	0	0	0
ggoiretrom27268	1	0	0	0	0	3
ggo_retrop02861	0	0	0	0	3	1
ggoiretrop33244	0	0	0	0	0	0
ggo_retrop04498	0	0	0	1	0	2
ggoiretrop18940	0	0	0	0	0	2
ggoiretrop18947	0	0	0	0	0	0
ggoiretrop38131	0	2	1	2	1	2
ggo_retrop04490	1	3	1	1	2	4
ggoiretrop24175	0	0	0	0	0	4
ggoiretrop35418	1	1	0	0	0	3
ggoiretrop22351	0	0	0	0	0	0
ggoiretrom30886	0	0	0	0	0	0
ggo_retrom04162	1	0	0	0	0	9
ggoiretrom30737	0	0	0	0	0	0
ggoiretrop23196	0	0	0	0	0	0
ggo_retrom03735	0	2	0	1	0	5
ggo_retrop00717	0	1	0	1	2	9
ggo_retrop00716	0	0	0	0	0	0
ggo_retrop00715	4	6	6	9	14	14
ggo_retrop00714	36	26	31	73	27	160
ggo_retrop00711	34	54	26	56	60	343
ggoiretrop02897	105	31	9	78	66	100
ggo_retrom04332	0	0	0	0	0	1
ggoiretrop10707	0	1	0	0	2	0
ggo_retrom04049	0	0	0	0	0	0
ggo_retrom00776	1	2	0	2	0	16
ggo_retrop01661	0	3	0	0	0	3
ggo_retrom00774	0	0	0	0	0	0
ggoiretrom06810	0	0	1	4	1	2
ggo_retrop01664	1	0	0	0	0	3
ggo_retrom00773	0	0	0	0	0	1
ggo_retrom00770	10	9	0	1	1	5
ggo_retrom00771	3	6	0	2	3	14
ggoiretrom22439	0	0	0	0	0	0
ggo_retrom01404	10	4	1	4	5	10
ggoiretrop02788	0	1	0	0	1	1
ggo_retrop04298	6	1	1	1	9	13
ggo_retrom01564	0	1	1	6	5	10
ggoiretrop02417	5	8	0	0	1	0
ggo_retrop00829	9	12	3	13	4	8
ggo_retrop00828	0	0	0	0	0	0
ggo_retrom01565	0	1	0	0	0	0
ggo_retrop01435	7	0	8	3	0	11
ggo_retrop00827	0	0	0	0	0	0
ggo_retrop00390	665	257	220	3924	8576	1753
ggo_retrop00396	0	1	1	1	0	3
ggo_retrop00823	0	0	0	1	0	2
ggo_retrop00822	0	0	0	0	0	0
ggo_retrom02855	0	0	0	0	6	7
ggoiretrop09454	0	0	0	1	0	0
ggo_retrom02857	5	14	4	9	7	20
ggo_retrom02856	0	2	0	0	1	0
ggo_retrom02851	1	4	0	0	1	2
ggo_retrom02850	0	2	0	0	0	3
ggo_retrom02859	0	0	0	2	2	16
ggo_retrom02858	0	0	0	0	0	0
ggo_retrom01561	0	0	0	0	0	0
ggo_retrom01396	1	0	0	0	0	1
ggoiretrom07724	0	0	0	0	0	0
ggoiretrom07723	0	0	0	0	0	1
ggo_retrom01391	9	16	4	10	9	18
ggo_retrop01438	0	0	0	0	0	0
ggoiretrop16938	19	2	0	1	0	6
ggo_retrom01563	0	0	1	0	0	1
ggo_retrom01556	0	2	0	0	0	32
ggoiretrop20091	1	0	0	0	0	1
ggo_retrom03724	0	0	0	0	0	2
ggo_retrop00621	0	0	0	0	0	1
ggo_retrop00620	1	0	1	0	2	0
ggoiretrop36053	1	1	2	2	0	1
ggo_retrop00626	0	0	0	0	0	0
ggo_retrop00625	326	179	100	457	235	901
ggo_retrop00624	0	0	0	0	0	0
ggoiretrop26971	0	0	0	1	0	0
ggoiretrom21614	3	1	0	1	2	4
ggo_retrop01717	0	0	0	0	0	2
ggo_retrom04075	0	0	4	0	0	4703
ggo_retrom03729	88	103	33	76	72	194
ggo_retrom04077	3	6	3	14	14	9
ggo_retrop01713	4	0	1	2	5	4
ggoiretrop32984	0	0	0	0	0	0
ggoiretrom24460	0	0	0	0	0	1
ggoiretrop22208	0	0	0	0	1	229
ggoiretrop26973	0	0	0	0	0	0
ggo_retrop03649	0	0	0	0	0	2
ggo_retrop04295	5	2	0	3	4	2
ggo_retrom03210	13	0	0	0	0	33
ggoiretrop19615	164	236	94	29	52	86
ggo_retrop01440	2069	1281	412	1068	949	2810
ggo_retrop04207	2	1	1	2	1	7
ggoiretrop33029	0	0	0	0	0	0
ggo_retrom00364	0	0	0	0	0	0
ggo_retrom02923	0	1	0	0	0	26
ggo_retrom02922	0	0	0	0	0	0
ggoiretrom24488	0	0	0	0	0	0
ggoiretrom24489	0	0	0	0	0	0
ggo_retrom00363	0	0	0	0	0	0
ggo_retrom03899	0	0	3	1	7	12
ggo_retrom02929	0	1	0	0	0	1
ggo_retrom02928	1	1	0	2	0	3
ggoiretrop34927	2	0	0	0	1	0
ggoiretrop33022	2	0	1	0	1	3
ggo_retrom00369	0	0	0	0	0	2
ggo_retrom00368	3	3	0	0	1	4
ggoiretrop34923	0	0	0	0	1	1
ggo_retrom00485	0	0	0	1	0	1
ggo_retrop03947	6	7	3	4	5	22
ggo_retrom00165	75	75	7	31	34	342
ggo_retrom00162	20	9	1	5	19	65
ggo_retrop00539	0	0	0	1	0	1
ggo_retrop00538	1	0	0	1	1	3
ggo_retrop00537	0	0	0	0	0	0
ggo_retrop01390	0	0	0	0	0	0
ggo_retrop00532	0	0	1	1	0	20
ggo_retrop00531	0	0	0	0	0	4
ggo_retrop00530	0	0	0	0	0	0
ggoiretrop23751	0	0	0	0	0	0
ggo_retrop03944	33	23	16	28	2	3
ggoiretrom21050	0	0	0	0	0	7
ggoiretrop27326	1	0	0	0	0	1
ggoiretrop27452	0	0	0	0	0	0
ggoiretrom18793	555	661	196	579	335	4512
ggoiretrom20419	0	0	0	0	0	0
ggoiretrop28614	0	0	0	0	0	24
ggoiretrop12940	0	0	0	0	0	0
ggoiretrom05660	4	7	0	1	4	1
ggo_retrom04440	0	0	0	1	1	8
ggo_retrom01161	0	0	0	9	124	2
ggoiretrop09145	0	0	0	0	0	0
ggo_retrom01163	0	1	1	0	0	5
ggo_retrom01164	0	0	0	1	0	1
ggo_retrom01165	0	0	0	0	0	0
ggoiretrop08498	7	1	1	1	0	2
ggoiretrop09140	0	0	0	0	0	0
ggo_retrom03983	0	0	0	0	0	0
ggo_retrom04288	0	0	0	0	0	3
ggoiretrop20866	3	1	0	0	0	0
ggoiretrop21598	21	15	5	49	27	59
ggo_retrom04282	89	64	18	43	16	146
ggoiretrop00151	8	9	1	5	3	9
ggo_retrom04281	9	0	1	5	0	1
ggo_retrom04582	0	0	0	0	0	0
ggo_retrom04287	1	4	0	0	0	4
ggoiretrop14121	1	2	3	7	3	6
ggoiretrom22061	0	0	0	0	4	0
ggoiretrop04491	37	43	15	78	94	366
ggoiretrom13383	15	20	7	8	16	129
ggoiretrom14369	0	0	0	0	0	0
ggoiretrop37908	0	0	0	1	0	0
ggo_retrom03947	2	2	0	0	0	0
ggo_retrom03940	3	0	0	1	0	6
ggoiretrop20518	0	0	0	0	0	1
ggoiretrop01319	2	0	0	1	1	0
ggo_retrop04593	0	0	0	0	0	1
ggo_retrop03923	1	6	0	0	1	4
ggo_retrop02783	0	0	0	0	1	0
ggo_retrom00941	0	0	0	0	0	0
ggo_retrom03833	1	1	0	0	0	0
ggoiretrom33884	7	2	2	0	1	1
ggo_retrom00944	5	3	0	1	1	2
ggo_retrom00947	0	1	0	0	0	1
ggo_retrom00946	3	0	0	0	0	1
ggo_retrom04195	0	0	0	0	0	2
ggo_retrom04813	0	0	0	0	0	8
ggoiretrom24653	1	0	0	0	1	2
ggo_retrom04812	0	0	0	0	0	1
ggoiretrop28503	0	0	0	1	0	0
ggo_retrop04312	2	0	0	0	0	9
ggo_retrop04614	0	4	17	9	66	72
ggoiretrom21874	0	1	0	1	3	6
ggo_retrop02787	249	283	48	138	232	1136
ggo_retrom04548	0	1	0	1	0	0
ggoiretrop14266	0	0	0	0	0	1
ggo_retrop04615	15	23	11	22	14	40
ggo_retrom01010	0	0	0	1	1	3
ggo_retrom01011	0	8	0	4	11	15
ggo_retrop02525	0	1	0	0	0	0
ggo_retrop03346	2	0	0	1	0	3
ggoiretrom10308	5	4	4	23	21	27
ggo_retrom02916	1	0	0	1	0	288
ggo_retrom02707	140	65	75	163	80	1029
ggo_retrom02706	0	0	0	2	0	1
ggo_retrop03729	1	4	1	4	5	10
ggo_retrom02917	0	0	0	0	0	5
ggo_retrop03417	0	2	2	2	0	0
ggo_retrop03721	0	0	0	0	1	5
ggoiretrop07079	0	0	0	0	0	0
ggo_retrop03726	7728	3682	2102	1946	4098	7019
ggoiretrop13969	0	0	0	0	0	3
ggo_retrop03652	0	0	0	0	0	0
ggo_retrop02460	0	2	0	3	1	6
ggo_retrom04338	1	0	1	1	4	5
ggoiretrop10925	543	422	131	482	603	2018
ggoiretrom32442	0	0	0	0	0	0
ggoiretrom17044	90	46	14	114	79	363
ggo_retrom02913	0	0	0	0	0	148
ggoiretrom22064	34	36	17	39	34	71
ggo_retrop02095	3	4	1	0	0	43
ggoiretrom05286	2	2	7	1	0	2
ggo_retrom00406	1	0	0	0	2	12
ggo_retrom01555	0	4	0	1	2	28
ggo_retrom02449	1	1	0	0	0	2
ggo_retrom02447	0	0	0	0	0	0
ggo_retrom02444	32	3	0	0	0	1
ggoiretrop20245	0	0	0	0	0	0
ggoiretrom36356	0	0	0	1	0	3
ggoiretrop10333	1	0	0	0	0	4
ggoiretrop25105	1	2	1	0	0	4
ggoiretrom23379	0	0	0	0	0	0
ggo_retrom04557	0	0	0	0	0	0
ggo_retrop02416	0	0	0	0	0	0
ggo_retrom02918	0	0	0	0	0	0
ggo_retrop02414	626	441	208	815	1344	710
ggo_retrom04203	8	2	0	2	4	14
ggo_retrop02546	0	0	0	0	0	0
ggo_retrom04225	1	1	0	1	0	1
ggoiretrop14390	0	0	0	0	1	1
ggo_retrop04375	37	25	10	1	0	8
ggo_retrop04840	0	0	0	0	0	22
ggo_retrom04664	6	9	1	7	9	40
ggo_retrom00110	0	0	0	0	4	2
ggo_retrop00752	0	0	0	1	0	0
ggo_retrom04668	0	1	0	3	0	13
ggoiretrop14399	61	24	11	20	28	64
ggoiretrom19339	0	1	0	0	6	1
ggoiretrom34731	0	0	0	1	0	11
ggo_retrom04553	0	0	0	13	5	4
ggo_retrop02676	0	0	0	0	0	0
ggo_retrom03881	0	2	0	0	0	0
ggo_retrom01834	0	0	0	0	1	0
ggo_retrop02675	0	0	0	0	0	0
ggo_retrop02672	0	0	0	2	8	3
ggo_retrop02673	0	0	0	0	0	0
ggo_retrop02670	2	6	0	1	0	6
ggoiretrom35006	1	0	0	0	0	5
ggo_retrop00757	0	0	0	0	0	0
ggo_retrop02899	0	0	0	0	0	0
ggoiretrop13498	2	0	0	1	0	1
ggo_retrop02678	0	0	0	0	1	0
ggo_retrop02679	0	1	0	0	0	0
ggoiretrom01574	33	21	3	2	1	5
ggoiretrom13250	0	0	0	0	0	3
ggoiretrom13257	0	0	0	0	1	0
ggoiretrom13256	0	0	0	0	0	0
ggoiretrop06238	14	11	1	10	11	28
ggo_retrop00754	1	0	0	0	0	0
ggoiretrop07324	3	4	0	2	3	3
ggoiretrop26812	47	62	22	116	68	202
ggo_retrom04494	0	1	0	1	1	0
ggoiretrom26252	1	1	0	0	1	1
ggo_retrom03092	0	1	0	1	0	1
ggo_retrom04201	0	0	0	0	0	0
ggoiretrop25740	0	0	0	0	0	0
ggo_retrop01114	0	0	0	0	0	1
ggoiretrom23326	0	0	0	0	0	0
ggoiretrop14645	0	0	0	0	0	0
ggo_retrop01870	0	0	0	0	0	0
ggo_retrop01872	0	1	0	0	0	0
ggoiretrop31892	0	0	0	0	0	0
ggo_retrop01874	0	0	0	1	1	2
ggoiretrop31891	0	0	0	0	0	0
ggo_retrom01942	0	0	0	0	0	0
ggo_retrom04715	1	0	0	0	0	0
ggo_retrom04716	0	0	0	0	0	0
ggo_retrom04717	3	3	1	2	4	8
ggo_retrom04710	0	0	0	1	2	0
ggo_retrom01947	0	0	0	0	0	1
ggo_retrop02256	17	23	100	79	54	16
ggo_retrom04713	0	2	2	4	6	14
ggo_retrop04155	1	14	0	0	0	6
ggo_retrom01843	0	0	0	0	1	0
ggoiretrop31418	0	0	0	0	0	40
ggoiretrop13381	0	0	0	0	0	0
ggo_retrop04151	0	0	0	0	0	0
ggo_retrop04150	15	9	9	35	30	148
ggo_retrom04842	6	8	5	10	5	26
ggo_retrop04152	8	21	8	26	8	55
ggo_retrop01058	0	0	0	1	0	3
ggo_retrop01479	14	15	19	345	73	73
ggoiretrom35079	1	3	0	0	0	1
ggo_retrom00565	0	1	2	6	0	3
ggoiretrom06667	156	190	78	213	167	869
ggoiretrom02718	0	1	0	1	0	1
ggo_retrop01275	3	2	0	1	0	1
ggo_retrom01840	0	0	1	1	9	5
ggo_retrop01273	2460	2111	964	1551	1868	3389
ggoiretrop13141	7	3	4	3	28	12
ggo_retrop01056	1	0	0	1	1	4
ggoiretrom02710	3	4	0	2	5	11
ggoiretrom34999	2	2	0	0	0	0
ggo_retrop01055	1	3	3	0	1	1
ggo_retrom03012	2	0	1	1	0	0
ggo_retrom01846	0	0	0	0	0	0
ggoiretrom03616	1	0	1	1	0	12
ggo_retrom03097	7	3	1	3	4	1
ggo_retrop02629	0	0	1	0	0	1
ggo_retrop01506	259	392	94	147	195	746
ggo_retrom04207	5	1	0	2	2	1
ggoiretrom03610	0	0	0	0	0	0
ggoiretrop26501	1	0	0	1	3	12
ggoiretrom25117	0	0	0	0	0	0
ggo_retrom01844	0	2	0	1	0	7
ggoiretrom20417	0	0	0	0	0	0
ggoiretrom18931	3	0	0	0	0	4
ggo_retrop00059	0	4	4	4	5	26
ggo_retrop04719	0	0	0	0	0	0
ggoiretrom36176	21	2	0	17	23	36
ggoiretrom26417	1	3	0	4	1	196
ggo_retrop02765	0	0	0	0	0	0
ggoiretrom08266	0	0	0	0	0	0
ggo_retrop04717	3	1	2	2	2	2
ggo_retrom01849	0	0	0	0	0	0
ggoiretrop35649	0	2	0	0	1	6
ggo_retrop00018	0	0	0	0	0	2
ggo_retrop00019	0	0	0	0	0	9
ggo_retrom03015	0	0	2	0	1	13
ggoiretrom11893	0	0	0	0	0	0
ggoiretrom11892	0	0	0	0	0	0
ggoiretrop13332	0	0	0	0	0	18
ggo_retrom01767	1	5	3	1	4	10
ggo_retrop00012	0	0	0	0	0	0
ggo_retrop00013	3	1	1	3	0	14
ggo_retrop00014	0	0	0	0	0	0
ggoiretrom12036	1	0	0	0	0	0
ggo_retrom01760	49	18	18	31	18	226
ggo_retrom01761	0	3	0	0	0	2
ggo_retrop04533	0	3	0	2	2	4
ggo_retrop04532	0	0	0	0	0	0
ggo_retrop04531	1	1	1	0	2	4
ggo_retrop04530	7	2	0	0	0	3
ggo_retrop04025	0	0	0	0	0	0
ggo_retrop04536	0	0	0	0	2	0
ggo_retrop04535	0	9	4	13	14	26
ggo_retrop04534	568	152	138	158	166	494
ggo_retrop04029	5	2	0	0	0	13
ggo_retrop04539	0	1	0	0	0	0
ggoiretrom10286	2	0	0	0	0	3
ggo_retrop01383	2	0	0	0	0	1
ggo_retrop01382	0	0	0	0	0	0
ggo_retrom03542	0	0	0	0	0	1
ggoiretrom17555	0	7	0	1	0	6
ggo_retrop01385	0	0	0	0	0	1
ggo_retrop01384	0	0	0	0	0	0
ggo_retrom03548	0	1	0	1	0	0
ggo_retrop02875	1	4	0	1	0	0
ggo_retrop02876	2294	1673	590	1762	1099	2984
ggo_retrop02870	0	0	0	0	0	0
ggoiretrom01750	0	1	0	0	0	3
ggoiretrop24764	0	0	0	1	0	2
ggo_retrop04363	0	1	0	0	0	1
ggo_retrom03409	0	0	0	0	0	0
ggo_retrom03292	13	18	7	14	5	22
ggo_retrom01549	5	1	2	1	3	19
ggoiretrop29917	0	0	0	0	0	0
ggoiretrom22547	22	18	6	19	13	70
ggoiretrom20222	0	0	0	0	0	0
ggoiretrom20414	0	0	0	0	0	0
ggo_retrom01495	0	0	0	0	0	2
ggoiretrom27293	2	1	0	1	0	1
ggo_retrom03932	0	0	0	0	0	5
ggo_retrop01659	0	9	0	2	0	7
ggo_retrom03400	0	0	0	0	0	9
ggo_retrop04449	8	11	0	0	1	27
ggo_retrop04448	95	45	54	195	134	100
ggo_retrop04447	17	3	2	5	3	12
ggo_retrop01126	0	0	0	0	0	16
ggo_retrop01657	0	0	0	0	0	0
ggo_retrop01124	4	1	0	0	0	0
ggo_retrop04443	0	0	2	0	0	36
ggo_retrop01120	20	13	2	38	38	95
ggo_retrom00701	3	3	1	5	3	1
ggo_retrom00707	0	0	0	1	0	0
ggoiretrom24921	0	0	0	0	0	1
ggo_retrop01498	8	18	8	9	19	1009
ggoiretrom13565	0	0	0	0	0	0
ggo_retrom00708	0	0	0	0	0	0
ggoiretrom25624	0	8	3	1	3	1537
ggo_retrop03747	1	1	0	1	2	3
ggoiretrop24275	0	0	0	0	0	0
ggoiretrom30984	0	0	0	1	2	3
ggo_retrop00839	3	0	0	0	1	2
ggo_retrom02613	0	0	0	1	0	3
ggo_retrom00418	0	0	0	0	0	0
ggo_retrop00832	0	0	0	0	4	0
ggo_retrop00833	8	0	0	5	0	224
ggo_retrop00830	0	0	0	0	0	0
ggoiretrop03954	0	0	0	0	0	1
ggo_retrop00835	24	28	4	14	107	14
ggoiretrom01971	0	0	0	0	3	0
ggo_retrom02843	0	0	0	0	0	2
ggo_retrom02840	0	0	0	0	1	2
ggo_retrom02841	8	2	0	29	136	11
ggo_retrom02847	0	0	0	0	6	0
ggoiretrop27684	0	0	0	0	0	0
ggoiretrom00407	10	10	0	2	2	9
ggo_retrom03657	0	0	0	0	0	6
ggoiretrom36911	0	0	0	1	0	1
ggo_retrom01385	0	0	0	0	2	0
ggo_retrop02909	0	0	1	1	0	0
ggoiretrop33384	0	1	2	0	1	11
ggo_retrop03132	2	3	1	9	20	3
ggo_retrom03594	4	1	0	0	0	7
ggo_retrom01389	0	0	0	0	0	3
ggo_retrom01546	1	2	0	0	0	2
ggoiretrop26624	0	0	0	0	0	0
ggoiretrop08828	2	1	0	0	0	0
ggo_retrop00634	0	0	0	0	0	1
ggoiretrom01362	1	0	0	0	1	602
ggo_retrop04338	0	0	0	0	0	0
ggo_retrom04061	0	0	0	0	2	1
ggo_retrop00638	0	0	0	0	0	0
ggo_retrop01722	3	9	0	0	0	24
ggoiretrop26629	2	3	0	1	1	3
ggo_retrom01179	0	0	0	0	1	0
ggo_retrom04068	51	57	7	57	147	262
ggo_retrom04069	2	2	0	1	3	4
ggoiretrom00715	0	0	0	0	0	0
ggo_retrom02938	2	1	0	0	0	1
ggoiretrop19196	7	1	0	4	5	0
ggo_retrom02936	0	0	0	1	0	3
ggoiretrom24100	0	0	0	0	0	0
ggo_retrom02934	0	0	0	0	0	3
ggo_retrom02935	0	0	0	0	0	0
ggo_retrom02932	0	0	0	0	0	0
ggo_retrom02930	1	0	0	0	0	2
ggo_retrom02931	0	0	0	0	0	1
ggoiretrom15574	0	0	0	0	0	0
ggo_retrom01173	0	0	0	0	0	0
ggo_retrom00371	0	0	0	0	1	2
ggo_retrom00376	0	0	0	0	0	0
ggo_retrom00374	0	0	0	2	0	2
ggoiretrom15573	0	0	0	0	0	0
ggoiretrop34932	2	0	0	0	0	2
ggoiretrop34931	0	5	8	3	1	2
ggo_retrom00174	0	0	0	0	0	0
ggo_retrom04729	0	0	0	0	0	0
ggoiretrom10400	2	0	0	0	1	3
ggo_retrom00170	67	40	14	40	19	110
ggo_retrom00171	40	34	7	19	23	203
ggo_retrom00172	98	84	14	30	52	273
ggo_retrop00524	19	19	7	58	49	47
ggo_retrom01177	0	0	0	0	0	0
ggo_retrop00526	0	0	0	0	0	0
ggo_retrop00521	0	0	0	0	5	448
ggo_retrop00522	0	0	0	0	0	1
ggo_retrop00523	5	23	1	12	7	15
ggoiretrom37118	32	20	7	32	15	64
ggoiretrop19286	0	0	0	0	0	1
ggoiretrop30558	1	2	0	0	0	0
ggoiretrom03260	24	19	5	26	24	107
ggoiretrop12959	0	0	0	0	0	0
ggoiretrom14556	0	0	0	0	0	0
ggoiretrop11584	3	0	0	2	1	59
ggo_retrom01409	0	0	0	0	1	0
ggo_retrom02601	0	0	0	0	0	0
ggoiretrop31514	0	0	0	0	0	2
ggoiretrom05675	1	0	0	1	1	1
ggo_retrom04475	0	0	0	0	0	0
ggo_retrom01154	0	0	0	0	0	0
ggoiretrom07830	0	0	0	0	0	0
ggoiretrom15314	0	0	0	0	0	1
ggo_retrom01150	0	0	0	0	0	0
ggo_retrom01152	0	0	0	0	0	0
ggoiretrop09157	0	0	0	0	0	1
ggo_retrom04479	113	38	9	88	86	157
ggo_retrom04298	0	0	0	1	0	2
ggo_retrom04277	1	1	2	0	0	8295
ggo_retrom04276	0	1	0	0	0	417
ggo_retrom04273	0	0	0	0	0	0
ggo_retrom04270	0	6	0	1	2	5
ggoiretrop11456	4	4	0	1	1	38
ggo_retrom04279	0	0	0	0	0	0
ggo_retrom04278	0	2	0	1	1	59
ggo_retrom01447	4	6	4	9	13	58
ggoiretrop20501	0	0	1	0	1	0
ggoiretrop33692	5	5	0	2	1	11
ggo_retrom03438	0	0	0	0	0	0
ggo_retrom03970	0	1	0	0	0	1
ggo_retrom03973	2	3	2	4	20	19
ggo_retrom03972	3	5	4	6	4	15
ggo_retrom03975	4	13	8	1	2	25
ggo_retrom03974	1	1	0	2	0	0
ggoiretrop21054	11	10	5	12	17	162
ggo_retrom00956	0	0	0	0	0	2
ggo_retrom00957	2	1	1	3	3	1
ggo_retrom00954	1	0	0	0	0	0
ggo_retrop03931	3	2	0	0	0	1
ggo_retrop03936	12	9	1	3	11	10
ggo_retrom00953	0	0	0	0	0	0
ggo_retrom00951	0	0	0	2	1	0
ggoiretrom13332	0	0	0	0	0	1
ggo_retrop04140	1	0	0	0	0	2
ggoiretrom08153	1	1	0	4	2	0
ggo_retrop03933	1	0	0	0	0	0
ggoiretrom26278	0	0	0	1	1	93
ggo_retrop03214	2	3	0	0	2	10
ggoiretrom00052	0	0	3	1	0	0
ggoiretrop04446	1	0	1	1	0	0
ggoiretrom10331	66	34	26	95	82	299
ggo_retrom02685	2	2	3	0	1	4
ggoiretrom11249	0	0	0	0	1	3
ggo_retrop02119	0	0	0	1	14	0
ggo_retrom04031	0	0	0	0	0	0
ggo_retrop01465	0	2	0	0	2	3
ggoiretrop37020	0	0	0	0	0	0
ggoiretrop29582	9	25	2	13	32	17
ggo_retrom04030	0	0	0	0	0	0
ggo_retrop04223	1	0	0	2	2	1
ggo_retrom04381	0	1	1	0	0	1
ggo_retrom04380	244	91	27	89	149	1487
ggo_retrom04387	0	0	0	0	1	3
ggoiretrom34436	3	0	0	0	0	2
ggo_retrop03949	1	0	0	0	1	0
ggo_retrop03731	463	438	1571	2887	3619	975
ggo_retrop03732	995	875	2456	4602	4992	1400
ggo_retrop02115	0	0	1	0	0	1
ggo_retrom00392	0	0	0	0	0	1
ggo_retrop01478	437	338	277	1094	2000	1700
ggo_retrop03640	484	122	26	274	486	824
ggo_retrop02114	0	0	0	0	0	2
ggo_retrop03645	3	0	3	0	0	90
ggoiretrop01003	507	343	18	24	6	732
ggo_retrop03421	1	3	4	5	2	0
ggo_retrop04638	0	3	0	0	1	0
ggo_retrom01444	1	0	0	0	0	0
ggoiretrom03847	0	0	0	0	1	0
ggo_retrom01694	0	0	0	1	1	3
ggoiretrom17034	9	0	0	0	0	2
ggoiretrom33363	0	0	0	0	0	0
ggoiretrom05297	16	5	3	3	5	19
ggoiretrop07087	2	3	0	8	2	16
ggoiretrom22070	0	0	0	0	0	0
ggoiretrom14042	2	0	0	1	0	5
ggo_retrom02435	2	0	0	0	0	1
ggo_retrom02434	0	0	0	0	0	0
ggo_retrop02468	0	0	0	0	0	0
ggo_retrom01690	0	0	0	0	0	2
ggo_retrom04655	4	5	2	6	7	11
ggoiretrom19896	0	0	0	0	0	2
ggo_retrom04657	2	0	0	1	9	1
ggo_retrom04656	2	0	0	2	3	1
ggo_retrop02466	0	0	0	0	0	0
ggo_retrop02465	34	40	12	37	14	53
ggo_retrop02464	2	1	2	2	1	2
ggoiretrop10804	0	0	0	0	0	1
ggoiretrop20659	1	0	5	0	0	0
ggoiretrom34727	59	20	4	26	5	500
ggo_retrom04493	31	16	30	6	7	3219
ggo_retrom01653	0	0	0	1	0	1
ggo_retrom04490	3	3	0	0	0	0
ggoiretrop16705	24	11	4	18	7	62
ggo_retrop02601	0	3	0	0	0	1
ggo_retrop02600	5	1	2	7	3	15
ggo_retrop02607	0	0	0	0	0	1
ggo_retrop02606	0	0	0	0	0	0
ggo_retrom01845	1	1	1	0	1	0
ggo_retrop02604	0	5	0	0	0	1
ggoiretrop31395	0	0	0	0	0	0
ggo_retrop01615	2	0	0	0	0	0
ggo_retrop02609	0	0	0	0	0	0
ggo_retrop02608	0	0	0	0	0	0
ggo_retrom03399	0	0	0	0	0	2
ggo_retrom02385	0	0	0	0	0	0
ggo_retrom03156	0	0	0	1	0	228
ggo_retrom02387	0	0	0	0	0	0
ggoiretrom32072	0	0	0	0	0	0
ggo_retrom03151	0	0	1	0	0	0
ggo_retrom00414	1	0	0	0	0	6
ggo_retrom03158	0	0	0	1	0	149
ggoiretrop29211	12	6	1	9	4	28
ggoiretrop35729	1	7	3	0	1	1
ggo_retrom02545	4	5	0	1	0	3
ggo_retrom02543	0	0	0	0	1	2
ggo_retrom02542	0	0	0	0	0	0
ggo_retrop01868	21	12	2	18	8	71
ggo_retrop01869	13	0	0	1	1	26
ggoiretrom03665	0	0	0	0	0	1
ggo_retrop01861	1	1	0	1	0	9
ggo_retrop02265	4	0	0	2	1	0
ggo_retrom01688	1	0	0	0	0	1
ggo_retrop02261	7	4	0	6	11	5
ggo_retrop02262	0	1	0	1	6	3
ggoiretrop34639	0	0	0	0	0	0
ggo_retrom04723	0	0	0	0	1	8
ggo_retrop02269	11	20	1	29	31	10
ggo_retrom04727	0	0	0	0	0	14
ggo_retrom04726	0	2	0	3	0	3
ggo_retrom00578	0	0	0	0	0	5
ggoiretrom09358	7	11	0	6	5	137
ggo_retrop04636	1	1	0	1	0	1
ggo_retrop04141	0	0	0	0	0	1
ggo_retrop01466	0	1	0	0	3	0
ggoiretrom09601	0	0	0	0	0	0
ggo_retrop04145	29	5	0	0	0	25
ggo_retrop02116	2	3	2	0	0	1
ggoiretrop14592	0	2	0	0	0	0
ggoiretrom09352	0	0	0	0	0	2
ggo_retrop02113	1	0	2	0	8	8
ggo_retrom00575	6	14	2	2	0	3
ggo_retrop01266	0	0	0	0	0	0
ggo_retrop01267	1	2	0	0	0	1
ggo_retrop02288	1	0	0	1	0	1
ggo_retrop02287	1	0	0	0	0	1
ggoiretrop08941	16	4	4	4	10	19
ggo_retrop02285	45	14	1	14	9	64
ggo_retrop01268	1	0	0	0	0	0
ggo_retrop02282	0	0	0	0	0	37
ggoiretrop01813	15	4	0	14	17	17
ggoiretrom03666	0	0	0	0	0	0
ggo_retrom02090	4	2	6	6	3	4
ggo_retrom02094	3	3	0	0	1	23
ggo_retrom02097	0	1	0	0	0	1
ggoiretrom28471	0	0	0	0	0	0
ggoiretrop12568	0	0	0	0	0	0
ggo_retrop03507	0	0	0	0	0	1
ggoiretrop29857	0	0	0	0	0	1
ggoiretrop03092	15	7	6	13	9	69
ggoiretrom26332	1	1	0	0	2	1
ggo_retrop04700	0	0	0	0	0	1
ggoiretrom37117	0	0	1	1	1	97
ggoiretrop35658	0	0	0	0	0	0
ggo_retrop04705	0	0	0	3	0	0
ggoiretrop25379	0	0	0	0	0	1
ggo_retrop00025	2	1	2	8	1	33
ggoiretrop33550	1	0	0	0	0	0
ggoiretrom11886	0	0	0	0	0	0
ggo_retrop00021	0	1	0	1	1	3
ggoiretrop11258	0	0	0	0	0	0
ggo_retrop00023	0	0	0	0	0	2
ggo_retrop00022	1	2	0	0	0	282
ggoiretrop30690	2	0	0	0	0	7
ggo_retrom01711	0	0	0	0	0	3
ggo_retrom01710	0	1	1	22	27	21
ggoiretrop13287	0	0	0	0	0	0
ggo_retrop04030	0	1	0	0	1	2
ggo_retrop04520	334	264	357	505	531	1349
ggo_retrop04521	3	0	0	0	0	1
ggoiretrop17076	0	1	1	1	1	0
ggo_retrop01003	3	1	1	0	0	0
ggoiretrop17072	1	0	0	0	21	6
ggoiretrom30756	0	1	0	0	0	580
ggo_retrop01008	2	2	0	2	3	2
ggo_retrop04529	0	0	0	0	0	2
ggoiretrom03522	0	0	0	0	0	1
ggo_retrom03576	3	0	0	0	0	8
ggo_retrom03570	0	3	0	1	2	9
ggoiretrom30766	0	0	0	0	0	0
ggo_retrop02849	0	0	0	0	0	0
ggo_retrop02848	3	3	1	2	1	2
ggo_retrop01393	0	0	0	0	0	0
ggo_retrop01394	0	0	0	0	0	0
ggo_retrop03505	0	0	0	0	0	1
ggoiretrop30697	5	2	1	3	4	4
ggo_retrom03894	0	0	0	0	0	0
ggo_retrop02843	0	0	0	0	0	0
ggoiretrom23034	0	0	0	0	0	1
ggoiretrop24404	0	0	0	0	0	2
ggo_retrom02369	4	5	1	4	3	11
ggo_retrom02368	5	8	6	7	12	17
ggo_retrom02367	16	9	11	28	31	52
ggoiretrom16963	266	125	47	519	347	723
ggoiretrom23748	2678	1811	461	1434	1945	6973
ggoiretrom16961	0	0	0	0	0	0
ggo_retrom02361	0	0	0	0	0	0
ggoiretrom27912	13	15	2	3	2	7
ggoiretrop32393	0	0	0	0	0	0
ggoiretrom23923	0	0	0	0	0	0
ggoiretrom23924	0	1	0	0	0	0
ggo_retrop00731	0	0	0	0	0	3
ggo_retrop00733	11	6	0	1	0	6
ggo_retrom01004	3	6	0	1	1	3
ggo_retrop01138	1	0	0	0	0	10
ggo_retrop01139	0	0	0	0	0	10
ggo_retrop00737	0	0	0	0	0	4
ggo_retrom03415	1	0	0	0	0	0
ggo_retrop04454	1	1	0	2	0	1
ggo_retrop04455	0	0	0	0	0	0
ggo_retrop04456	0	0	0	0	0	0
ggo_retrop04457	3	3	0	2	0	14
ggo_retrop04451	0	0	0	0	0	0
ggo_retrop01132	0	0	0	0	0	0
ggo_retrop04453	11	16	3	26	5	21
ggo_retrop01402	0	0	0	0	0	0
ggoiretrom32860	3	1	0	0	0	0
ggo_retrop04703	1	0	0	1	0	174
ggoiretrom27628	4	1	5	4	11	3
ggoiretrop05302	3	5	4	6	3	12
ggo_retrom00718	29	54	3	29	19	65
ggo_retrop01480	3	36	0	4	29	9
ggoiretrom20698	0	0	0	0	0	1
ggoiretrom09776	0	0	0	0	0	0
ggoiretrom12620	17	53	2	1	6	11
ggoiretrop02947	16	12	2	9	22	31
ggo_retrop03452	2	1	1	1	1	16
ggo_retrom03893	2	0	0	0	0	0
ggo_retrop03044	0	0	0	0	0	0
ggo_retrom00244	4	0	3	0	0	10
ggo_retrom02587	0	0	0	0	0	0
ggoiretrop33603	0	0	0	0	0	0
ggo_retrom00789	1	3	0	0	1	0
ggoiretrop33607	0	0	0	0	0	0
ggo_retrom03993	2	0	0	0	0	0
ggo_retrop00923	0	0	0	1	3	0
ggoiretrom25993	7	6	8	4	0	8
ggoiretrop33555	2	4	0	2	6	4
ggoiretrop26811	1	1	0	0	0	11
ggo_retrom01850	0	1	0	0	3	4
ggo_retrop00352	0	0	0	0	0	0
ggoiretrom30407	0	0	1	1	0	1
ggo_retrop01736	0	0	0	0	0	0
ggo_retrom01531	0	0	0	0	0	0
ggo_retrom00249	0	0	0	0	0	0
ggo_retrom04017	0	0	0	0	0	2
ggo_retrom04016	1	5	5	11	4	13
ggo_retrom04015	1	0	0	3	1	0
ggo_retrom04014	0	0	0	1	1	0
ggoiretrop01021	60	69	11	12	7	41
ggo_retrom04018	0	0	0	0	0	0
ggo_retrom02906	0	0	0	0	0	0
ggo_retrop03457	10	4	9	8	9	151
ggo_retrop01738	0	0	2	2	0	36
ggo_retrop01739	1	0	0	4	6	4
ggo_retrom01661	8	2	0	0	1	0
ggoiretrop09234	0	0	0	1	1	3
ggo_retrop03324	4	3	1	0	1	3
ggo_retrom02530	0	1	0	0	4	1
ggoiretrom22062	240	206	67	194	145	222
ggo_retrom00782	1	0	0	8	8	7
ggoiretrom00762	3	6	0	3	5	69
ggoiretrop23557	0	0	0	0	0	3
ggoiretrom00765	92	32	62	86	83	70
ggoiretrom21410	0	1	0	0	1	1
ggoiretrop08545	0	0	1	0	0	4
ggo_retrom02948	9	12	2	90	8	14
ggoiretrop22066	2	0	0	0	2	1
ggoiretrom19409	0	0	0	0	0	0
ggo_retrom02943	5	6	4	2	7	8
ggo_retrom02942	2	3	0	0	0	0
ggo_retrom02941	3	4	0	1	0	1
ggo_retrop03320	22	68	13	31	16	49
ggo_retrom02947	0	0	0	2	0	1
ggo_retrom02946	0	0	0	0	0	0
ggo_retrom02945	0	0	0	0	0	57
ggo_retrom02944	0	0	0	0	0	0
ggoiretrom34221	0	0	0	1	0	1
ggo_retrop00140	13	20	15	22	22	51
ggoiretrom15549	0	0	0	0	0	0
ggoiretrop04823	0	0	0	1	0	0
ggoiretrop14036	0	0	0	0	0	8
ggoiretrop14031	4	0	0	0	1	0
ggo_retrop01417	0	0	0	1	0	8
ggo_retrom00144	29	42	2	29	15	130
ggoiretrop10021	155	20	63	135	106	64
ggo_retrop00511	7	2	2	3	1	5
ggoiretrom08942	0	0	0	0	0	15
ggo_retrom04125	0	0	0	0	0	0
ggo_retrop00512	1	0	0	1	0	2
ggo_retrom01443	0	0	0	0	0	0
ggo_retrom01442	0	0	0	2	1	1
ggo_retrop00517	1	0	0	0	0	1
ggoiretrop22485	0	0	0	0	0	0
ggo_retrop01414	1	0	0	0	0	0
ggo_retrom04100	0	0	0	0	0	0
ggo_retrop01413	0	0	0	0	0	0
ggoiretrom24020	0	0	0	0	0	1
ggoiretrom21079	0	0	0	0	0	1
ggo_retrop03864	1	1	0	0	0	2
ggoiretrom19316	5	1	0	3	2	23
ggoiretrop07655	0	0	0	0	0	0
ggoiretrom30757	0	0	1	2	0	5
ggoiretrop12963	1	0	0	0	3	4
ggo_retrom01666	0	6	1	1	0	3
ggo_retrop04130	6	3	0	2	8	42
ggo_retrom03619	39	25	12	25	35	84
ggo_retrom04462	0	0	1	0	2	0
ggoiretrop09168	4	0	0	1	0	6
ggo_retrom01140	3	1	0	0	0	0
ggo_retrom02861	0	0	0	0	0	1
ggo_retrom04465	0	0	0	0	0	20
ggoiretrop19274	0	0	0	0	1	0
ggo_retrom01148	5	4	5	3	10	3
ggo_retrom01149	21	7	4	16	12	33
ggoiretrop09167	1	2	0	0	1	4
ggo_retrop02493	0	0	0	0	0	0
ggo_retrom02120	599	199	186	326	488	565
ggoiretrop36495	0	0	0	0	0	4
ggo_retrom04267	0	0	0	0	0	0
ggoiretrop27362	0	0	0	1	0	1
ggo_retrop01439	0	0	0	0	0	1
ggoiretrop37654	0	0	0	0	0	0
ggoiretrop10898	0	0	0	0	0	0
ggoiretrop00179	1	0	0	0	0	827
ggo_retrom04269	1	2	1	0	0	1
ggo_retrom02897	3	1	1	0	0	8
ggo_retrom01188	1	0	0	1	0	0
ggo_retrom03966	1	0	0	0	0	1
ggo_retrom03963	3	1	0	2	3	8
ggo_retrom03960	0	0	0	0	0	1
ggo_retrom03961	3	1	0	3	2	25
ggoiretrom19262	33	31	12	20	23	55
ggo_retrop01418	0	0	0	0	0	0
ggoiretrop26541	19	8	0	4	10	7
ggo_retrom03969	24	50	42	173	145	184
ggoiretrom04838	0	0	0	0	0	13
ggo_retrom00922	0	0	0	0	0	1244
ggo_retrom00921	2	8	1	3	1	4
ggo_retrom00920	3	5	0	1	0	20
ggo_retrop03415	0	0	0	0	0	0
ggoiretrop19373	8	3	0	1	2	6
ggoiretrop04692	0	0	1	0	1	398
ggoiretrom14436	0	0	1	1	1	6
ggoiretrom21897	0	0	0	0	0	2
ggoiretrom08369	1	0	0	0	0	1
ggo_retrom02560	4	19	1	6	7	11
ggo_retrop03140	1	0	0	0	0	0
ggo_retrop02520	0	0	0	0	0	4
ggo_retrom01031	0	0	0	34	217	2
ggo_retrom02763	0	2	0	0	1	1
ggo_retrop03094	5	32	0	6	2	14
ggo_retrom02761	4	1	0	0	2	49
ggo_retrom02760	848	1081	663	2679	3350	14327
ggo_retrom02767	0	1	0	1	3	8
ggo_retrop01396	0	0	0	0	0	0
ggoiretrom04467	0	0	15	67	77	207
ggoiretrom07995	0	0	0	0	0	0
ggo_retrom03271	0	2	0	2	0	0
ggoiretrom22590	0	0	0	0	0	0
ggo_retrom00817	1	1	1	9	2	13
ggo_retrom00816	4	0	1	2	0	20
ggo_retrom00815	1	0	0	4	3	2
ggo_retrom00814	157	106	65	127	160	425
ggo_retrom00813	0	4	2	1	2	4
ggoiretrop22191	0	0	0	1	0	0
ggo_retrom00811	0	0	0	0	2	12
ggoiretrop01573	1	0	0	0	0	0
ggoiretrom22574	0	0	0	1	0	2
ggoiretrom20404	0	0	0	0	0	0
ggo_retrop03278	0	1	0	0	0	1
ggoiretrom22191	0	0	0	0	0	0
ggo_retrop03079	0	0	0	0	0	0
ggo_retrop03078	8	3	0	1	0	15
ggo_retrom01151	9	29	6	18	37	109
ggoiretrom18359	0	0	0	0	0	0
ggo_retrop03074	1	2	0	1	0	1254
ggoiretrop00226	0	0	0	0	0	7
ggo_retrom02428	21	16	0	6	53	27
ggo_retrom02532	0	0	2	0	0	0
ggoiretrom14059	0	0	0	0	0	0
ggo_retrom02420	0	0	0	0	0	0
ggo_retrop03897	0	0	0	0	0	0
ggo_retrom02423	5	0	1	0	8	1
ggo_retrop03891	0	0	0	0	0	106
ggo_retrom02425	2	0	0	1	0	0
ggo_retrom02426	2	2	3	1	1	6
ggoiretrop29278	0	0	0	0	0	0
ggo_retrop02478	1	0	0	0	0	1
ggoiretrom36575	0	0	0	0	0	0
ggoiretrom05020	0	0	0	0	0	0
ggoiretrom19886	0	0	0	0	0	0
ggo_retrop02473	4	7	4	6	13	12
ggoiretrom01030	0	0	1	2	0	0
ggo_retrom04647	0	0	0	0	1	1
ggo_retrop02476	0	0	0	0	0	0
ggo_retrom02533	0	0	0	0	0	0
ggo_retrom03095	0	0	0	0	0	0
ggo_retrom04484	0	0	0	0	0	1
ggoiretrom34710	0	5	1	1	5	0
ggo_retrom04480	0	0	0	0	0	19
ggo_retrom04482	0	0	0	0	0	0
ggo_retrop02610	0	0	0	2	4	4
ggo_retrom01851	0	0	0	0	0	0
ggo_retrop02612	1	1	0	1	0	7
ggo_retrom01853	0	0	0	0	0	0
ggo_retrom01854	0	0	0	0	0	0
ggo_retrop02615	7	2	0	0	1	5
ggo_retrop02616	0	0	0	0	0	1
ggo_retrop02617	21	16	0	8	25	77
ggo_retrop02618	2	2	2	1	10	45
ggoiretrop31384	0	0	0	0	0	0
ggo_retrom02392	0	0	0	0	0	0
ggo_retrom02393	0	0	0	0	0	0
ggo_retrom03146	1	4	0	1	2	7
ggo_retrop04114	0	0	2	0	0	1
ggo_retrom02397	0	0	0	0	1	0
ggo_retrom02394	0	0	0	0	0	0
ggoiretrop24150	1	1	1	1	0	2
ggo_retrom03148	0	0	0	0	3	0
ggo_retrom02554	0	0	0	0	0	1
ggoiretrop35865	0	0	0	0	2	1
ggo_retrop01818	3	0	0	1	0	9
ggo_retrom02550	0	0	0	0	0	2
ggo_retrom02551	0	0	1	1	0	0
ggoiretrop34628	0	3	1	2	2	16
ggoiretrom02458	1	0	1	2	4	4
ggo_retrop01813	0	0	0	0	0	0
ggoiretrom09167	1	0	0	0	0	2
ggo_retrop01811	3	2	0	4	7	52
ggo_retrop01817	2	0	0	2	1	5
ggo_retrop01816	0	0	0	0	0	5
ggo_retrop01814	0	0	0	0	0	2
ggo_retrom04736	1	0	1	2	1	0
ggo_retrom04737	2	0	0	1	7	15
ggo_retrop03678	1	1	1	2	1	94
ggo_retrom04730	0	0	0	0	0	1
ggo_retrop03674	9	4	11	27	0	28
ggo_retrop03677	88	112	26	209	98	565
ggo_retrop03671	0	2	0	0	0	4
ggo_retrom04739	0	0	0	0	0	0
ggoiretrom35284	105	71	166	267	83	339
ggoiretrom06135	3	2	1	1	2	2
ggo_retrom00547	0	0	0	0	0	2
ggo_retrop04602	0	0	0	0	0	0
ggo_retrop03930	0	0	0	1	0	1
ggo_retrom04323	0	0	0	0	0	25
ggo_retrop02942	0	0	0	0	0	0
ggo_retrop02106	0	0	0	0	1	3
ggo_retrop02107	7	0	0	3	0	80
ggo_retrop02100	5	2	1	5	6	14
ggo_retrom00548	2	0	0	0	0	1
ggo_retrop02298	0	0	0	0	4	1
ggoiretrom35112	0	0	0	1	0	7
ggo_retrom02089	1	0	0	0	0	0
ggo_retrop02294	0	0	0	0	1	2
ggo_retrop02295	15	10	4	2	4	10
ggo_retrop02296	0	0	0	0	0	0
ggo_retrop02290	0	2	0	0	0	10
ggo_retrom02080	10	14	1	7	3	12
ggo_retrom04320	0	0	0	0	0	0
ggo_retrom04329	3	8	1	12	15	10
ggo_retrop04735	0	0	0	0	0	0
ggo_retrop04734	0	0	0	0	0	2
ggo_retrop04737	0	0	0	0	0	0
ggo_retrop02402	0	1	0	1	1	1
ggo_retrop01923	1	0	0	1	0	1
ggo_retrop04730	4	1	1	5	8	23
ggo_retrop04733	0	0	0	0	1	0
ggo_retrop04732	0	0	0	0	0	0
ggoiretrop31540	0	0	0	0	0	4
ggoiretrop35668	2	0	0	1	0	1
ggoiretrop21994	0	0	0	0	3	0
ggo_retrop01929	0	2	1	1	1	346
ggoiretrom37135	0	0	0	0	0	1
ggoiretrom31827	1	1	1	10	2	0
ggo_retrom01709	2	0	2	5	21	13
ggo_retrop00030	0	0	1	0	1	0
ggo_retrop00031	0	0	0	0	0	1
ggo_retrop04519	0	0	0	0	4	2
ggo_retrop04518	0	0	0	0	0	0
ggo_retrop00034	4	3	1	7	1	17
ggo_retrop00039	9	4	0	3	5	23
ggo_retrop04511	56	30	8	20	217	46
ggoiretrom06733	16	21	62	137	89	3724
ggo_retrop01033	12	2	3	5	10	16
ggoiretrom12489	17	12	0	3	0	3
ggoiretrom26982	0	0	0	0	0	1
ggoiretrop17590	2	1	0	0	0	6
ggo_retrop04289	2	1	0	0	0	0
ggoiretrop17047	0	0	0	0	0	0
ggoiretrom02029	0	1	3	0	0	2
ggo_retrop04285	0	0	0	0	0	1
ggo_retrop04284	0	0	0	0	0	4
ggo_retrom03560	4	3	2	1	1	0
ggoiretrom24579	0	0	0	0	0	0
ggoiretrom34884	17	12	4	20	1335	53
ggo_retrop04283	1	0	0	0	0	11
ggo_retrop04282	0	3	0	0	0	0
ggoiretrop18938	0	0	0	0	0	0
ggoiretrom16682	1	1	0	1	1	0
ggoiretrop23329	53	25	6	54	64	73
ggo_retrom00490	0	0	0	0	0	36
ggo_retrom03368	0	0	0	0	2	1
ggoiretrom04196	0	0	0	0	0	0
ggo_retrop02850	0	0	0	0	0	0
ggo_retrop02851	0	0	0	0	0	0
ggo_retrom02173	0	0	0	0	0	5
ggo_retrom00498	0	0	1	1	2	10
ggo_retrom03360	1	0	0	0	0	0
ggo_retrop01648	0	0	1	2	7	2
ggo_retrom03362	1	0	0	0	0	7
ggo_retrom03439	0	0	0	0	0	1
ggo_retrop01649	0	0	0	0	0	0
ggoiretrom16993	0	2	0	0	0	33
ggo_retrom02374	0	0	0	0	0	7
ggo_retrom02376	2	1	0	0	0	0
ggo_retrom01093	2	1	0	0	0	21
ggoiretrop38363	1	1	0	1	0	6
ggo_retrom02372	0	0	0	0	1	0
ggo_retrom01622	0	0	0	0	0	0
ggo_retrom01829	0	0	0	0	0	0
ggo_retrom03079	0	0	0	6	0	434
ggo_retrom03414	2	1	1	1	1	0
ggo_retrop00728	17	7	1	3	6	6
ggo_retrop00729	2	4	0	1	0	2
ggo_retrop00722	0	0	0	0	1	0
ggo_retrop00739	0	0	0	0	0	1
ggoiretrom23150	0	0	0	0	0	1
ggo_retrop04015	0	1	0	0	0	0
ggoiretrom34084	0	1	0	0	0	1
ggo_retrop00738	1	0	0	0	2	3
ggo_retrop04460	1	0	0	3	2	6
ggo_retrop01103	13	3	0	0	0	2
ggo_retrop01102	1	1	0	2	0	4
ggo_retrom00721	0	0	0	0	0	0
ggo_retrop01104	9	4	0	4	3	4
ggo_retrop04466	0	0	0	0	0	0
ggoiretrop13346	8	3	1	3	4	17
ggoiretrop05313	1	0	1	0	3	1
ggo_retrop01137	1	0	0	0	0	3
ggoiretrom31726	1	0	1	0	0	1
ggoiretrom20685	6	0	0	1	1	2
ggo_retrop04192	2	0	0	2	0	11
ggo_retrom03902	0	0	0	0	0	0
ggo_retrop01131	1	1	1	9	0	3
ggoiretrom01643	3	2	2	5	0	47
ggoiretrop33549	1	0	0	0	0	0
ggo_retrom01823	0	0	0	0	0	0
ggoiretrop23787	0	0	0	0	0	0
ggoiretrop19464	0	0	0	1	0	2
ggoiretrop28936	37	16	6	74	50	92
ggoiretrop12885	0	0	0	0	0	0
ggo_retrop02888	0	0	0	0	1	0
ggoiretrom03418	1	0	0	1	0	0
ggo_retrom03779	0	0	0	5	4	1
ggo_retrop00619	0	0	0	1	0	3
ggo_retrop00349	1	1	0	0	0	116
ggoiretrom20405	0	0	0	0	0	1
ggoiretrom12444	0	0	0	0	0	2
ggo_retrom03773	0	0	0	0	0	0
ggo_retrop01527	0	0	0	0	0	6
ggoiretrop10401	0	2	1	5	1	0
ggoiretrop32233	1	0	0	0	1	3
ggo_retrop00617	0	0	0	0	0	2
ggo_retrom03775	0	0	6	1	5	6593
ggo_retrop01489	1	0	0	1	0	0
ggo_retrop01743	1	1	0	0	0	0
ggo_retrop01742	0	0	1	0	0	0
ggo_retrop01747	0	0	0	0	0	5
ggo_retrop01745	2	0	0	0	0	7
ggo_retrop01744	3	1	7	20	27	27
ggo_retrom01528	0	0	0	0	0	0
ggo_retrom00030	0	0	0	0	0	0
ggo_retrom00033	69	185	15	51	52	182
ggo_retrom00032	1	0	0	0	0	0
ggoiretrop22041	0	0	0	1	0	2
ggo_retrop01484	19	11	0	9	1	12
ggo_retrom03037	0	0	0	0	0	1
ggoiretrop22043	2	4	0	0	0	2
ggoiretrom02200	2	0	0	0	0	1
ggoiretrom24087	0	1	0	0	0	1
ggoiretrop33720	0	0	3	1	1	1
ggoiretrom25956	1	0	1	0	2	2
ggoiretrom12443	0	0	0	0	0	4
ggo_retrom01617	300	183	29	190	117	1960
ggoiretrop22071	0	0	0	0	0	0
ggoiretrop08572	0	0	0	0	0	2
ggoiretrop22074	396	575	387	901	723	2494
ggoiretrop22093	0	0	0	0	0	1
ggo_retrom02951	0	0	0	0	0	2
ggo_retrom02952	0	1	0	0	4	44
ggo_retrop04011	0	0	0	0	0	0
ggo_retrop03460	2	0	0	0	0	2
ggo_retrom02956	0	0	0	0	0	0
ggo_retrom02957	189	103	0	19	0	1564
ggoiretrom00512	0	2	0	1	0	2
ggo_retrom01202	4	0	1	5	2	2
ggoiretrom00519	0	0	0	0	0	1
ggo_retrom00154	0	0	0	1	0	0
ggo_retrom01614	2	0	1	0	1	9
ggoiretrop10053	0	0	0	0	0	0
ggo_retrop00507	0	0	0	0	0	0
ggoiretrop10050	10	5	5	5	1	2
ggo_retrop00502	1	1	2	1	0	6
ggo_retrop03804	0	0	0	0	0	2
ggo_retrom03600	4	3	1	1	5	3
ggo_retrom01454	3	0	0	4	1	7
ggo_retrom01455	1	0	0	0	0	3
ggo_retrom04136	0	0	0	0	0	3
ggo_retrom01457	50	12	2	14	12	207
ggo_retrom01450	1	0	0	0	0	2
ggo_retrom01451	0	0	0	0	0	0
ggoiretrom10742	0	0	0	0	0	0
ggo_retrom01453	0	0	0	2	0	1
ggoiretrop26798	36	21	8	40	19	46
ggoiretrop23221	3	12	3	2	0	2
ggoiretrop05464	2	9	0	2	1	5
ggoiretrop21579	99	99	12	27	47	101
ggo_retrop03198	0	0	0	0	0	0
ggo_retrop00702	0	0	0	1	0	1
ggoiretrop21413	0	1	0	0	0	0
ggoiretrop01748	4	5	3	1	3	3
ggo_retrop03809	9	3	1	0	1	2
ggo_retrop04246	1	0	0	0	0	0
ggoiretrom33050	75	59	8	47	12	135
ggoiretrom15332	0	0	0	0	0	3
ggoiretrop22670	1	0	0	0	0	10
ggoiretrop26378	1	1	0	1	2	2
ggoiretrom15887	0	0	0	0	0	0
ggo_retrom02605	2	3	0	1	0	12
ggo_retrom04006	1	1	0	0	0	3
ggo_retrom02985	1	2	2	2	1	2
ggoiretrop15978	0	0	0	0	0	0
ggoiretrop19241	0	0	0	0	0	0
ggo_retrop03344	0	0	0	0	0	0
ggoiretrop21533	22	19	5	13	15	198
ggo_retrom02886	0	0	0	0	0	0
ggo_retrom02884	0	0	1	1	0	0
ggoiretrop11475	5	5	0	8	5	45
ggoiretrop09483	0	0	0	1	0	0
ggo_retrom02880	1	0	0	2	1	1
ggo_retrom02881	0	0	0	1	0	0
ggo_retrom04259	2	4	0	11	1	0
ggoiretrom11938	3	3	0	0	0	2
ggo_retrom02889	1	0	1	0	0	1
ggo_retrom03913	0	0	0	0	0	0
ggoiretrom26309	0	0	0	0	0	0
ggo_retrom03910	4	2	1	0	3	199
ggo_retrom03917	19	24	13	24	34	48
ggo_retrom03916	1	0	0	0	2	1
ggo_retrom03915	1	0	0	0	0	4
ggo_retrom01613	3	3	0	2	1	3
ggoiretrom29239	6	1	0	4	0	12
ggoiretrom08398	0	0	0	0	0	0
ggoiretrop31401	3	4	1	1	2	1
ggoiretrom25961	0	0	0	1	2	2
ggoiretrom13644	24	21	4	8	6	42
ggo_retrom00931	0	0	0	0	1	5
ggo_retrom00932	0	0	0	0	1	1
ggo_retrom00934	1	10	1	5	5	9
ggoiretrop09082	1	4	1	2	1	954
ggo_retrom00938	0	0	0	0	0	1
ggo_retrop01967	1	0	2	3	2	4
ggoiretrop21685	0	0	0	0	0	0
ggoiretrom19370	11	21	3	9	6	388
ggo_retrop01518	0	0	0	0	0	0
ggoiretrop32908	11	7	2	4	5	22
ggoiretrom33614	0	0	0	1	0	0
ggoiretrom04457	5	3	2	4	6	11
ggoiretrom08371	0	0	0	0	0	0
ggo_retrop01269	0	1	0	0	1	3
ggoiretrop29065	0	0	0	0	0	0
ggo_retrom02771	0	0	1	0	1	23
ggo_retrop03080	0	0	0	1	8	30
ggoiretrop13938	0	0	0	0	0	10
ggo_retrom01285	0	0	0	0	0	4
ggo_retrom02779	20	9	4	39	48	163
ggo_retrom01286	0	0	0	0	0	1
ggo_retrom01280	1	1	0	0	0	6
ggo_retrom01283	0	0	0	0	0	1
ggo_retrom01282	1	0	0	0	1	0
ggo_retrom00804	2	3	0	2	1	16
ggo_retrom00805	3	12	1	3	10	17
ggo_retrom00806	9	11	1	7	3	18
ggo_retrom00800	0	0	0	0	0	0
ggo_retrom00801	0	0	0	0	0	0
ggo_retrom00803	3	1	3	1	3	12
ggo_retrom03827	2	1	0	0	0	8
ggo_retrom03825	0	0	0	1	1	2
ggo_retrom03823	0	0	1	0	0	0
ggoiretrop01589	13	23	3	16	8	7
ggo_retrom03820	1	0	0	0	0	6
ggo_retrop03378	0	0	0	0	1	1
ggo_retrop02597	3	0	0	0	0	0
ggo_retrop01842	0	0	0	0	0	0
ggo_retrop03379	27	4	23	18	35	18
ggo_retrom03704	1	0	0	0	1	31
ggo_retrop03060	0	0	2	8	3	12
ggo_retrop03888	54	83	19	55	52	167
ggo_retrop03889	0	0	0	7	0	2
ggo_retrom01954	0	3	1	1	5	17
ggo_retrop03882	13	11	1	4	1	9
ggo_retrop03880	2	0	0	1	1	3
ggoiretrom27069	0	0	0	0	0	0
ggo_retrom02419	0	0	0	0	0	0
ggo_retrop03887	6	5	5	2	3	25
ggoiretrop14347	0	0	0	0	0	3
ggo_retrop02444	1	0	0	1	3	1
ggo_retrop01460	27	10	8	18	35	48
ggo_retrom01956	4	2	1	1	6	13
ggoiretrom07971	0	0	0	0	0	0
ggo_retrop02443	0	1	0	0	0	6
ggoiretrom27822	0	0	0	0	0	0
ggoiretrom21937	0	0	0	1	0	1
ggoiretrom31506	0	0	0	0	0	1
ggo_retrop02449	0	0	0	0	0	0
ggo_retrom01438	0	1	0	1	0	0
ggo_retrop02710	0	0	0	0	0	0
ggo_retrom01199	0	0	0	0	0	5
ggoiretrom34707	0	0	0	0	0	0
ggoiretrop17832	0	0	0	0	0	29
ggo_retrom04159	0	2	0	0	0	0
ggoiretrom22681	62	32	3	41	21	126
ggo_retrom01191	0	0	0	1	0	2
ggo_retrom01190	5	4	3	6	3	172
ggo_retrom01193	3	3	1	2	1	8
ggo_retrop03405	3	3	4	0	1	4
ggo_retrom01194	3	5	1	3	5	12
ggo_retrom01197	2	5	5	2	0	102
ggo_retrom01196	1	2	0	0	0	13
ggo_retrop01448	2	0	0	1	2	112
ggoiretrom20407	0	0	0	0	0	0
ggo_retrom02984	0	0	0	0	0	0
ggo_retrom03702	0	0	0	0	0	1
ggo_retrop01449	1	0	0	0	3	0
ggoiretrom22684	0	0	0	0	0	0
ggoiretrop06772	0	1	0	1	1	4
ggoiretrom13266	3	4	2	5	3	9
ggoiretrop25914	0	0	0	0	0	0
ggoiretrop06777	0	0	0	0	1	2
ggo_retrom02982	3	1	1	11	8	39
ggo_retrom03170	0	0	0	0	1	1
ggo_retrom00696	4	1	0	0	0	126
ggoiretrom27247	0	0	0	0	0	0
ggo_retrop03768	6	2	0	1	0	5
ggo_retrom00691	1	25	23	144	141	401
ggo_retrop00057	0	1	0	5	1	10
ggoiretrop24310	1	0	0	0	0	0
ggoiretrom13461	0	0	0	0	0	9
ggo_retrop01809	0	0	0	0	2	3
ggo_retrop01800	108	78	21	180	126	386
ggoiretrop34652	0	0	0	0	0	0
ggoiretrom02446	0	0	0	0	0	0
ggo_retrop01803	0	0	1	1	2	3
ggo_retrop01804	2	1	1	0	1	7
ggo_retrop01805	1	3	2	4	11	11
ggo_retrom03668	244	246	67	441	521	670
ggo_retrom01990	39	45	10	23	26	29
ggoiretrop30575	0	0	0	0	0	0
ggo_retrom01995	0	1	0	0	1	0
ggo_retrom04746	3	6	1	1	6	3
ggo_retrom04745	0	0	0	0	0	0
ggo_retrom01548	0	0	0	0	0	7
ggo_retrom01858	0	1	0	0	0	0
ggo_retrom01998	0	0	0	0	0	2
ggo_retrop03660	0	0	0	0	0	0
ggo_retrop03666	0	0	0	2	0	9
ggo_retrop04162	1	0	0	0	1	6
ggo_retrom00552	0	1	0	0	0	0
ggo_retrom03289	0	0	0	0	1	1
ggo_retrom00551	1	0	0	0	0	1
ggo_retrop03277	0	0	0	0	0	0
ggo_retrop01248	0	0	0	0	0	0
ggo_retrop01249	0	0	0	1	0	29
ggo_retrop01246	2	4	2	0	0	2
ggoiretrop32691	0	0	0	0	0	0
ggo_retrop01244	3	3	3	4	3	13
ggo_retrop02132	5	1	3	4	1	2
ggo_retrop01240	0	0	0	0	0	0
ggo_retrom00513	0	0	0	0	0	0
ggoiretrom35120	0	0	0	0	0	0
ggo_retrop01735	0	0	0	0	0	0
ggo_retrop02913	0	0	0	0	0	0
ggo_retrop02912	2	1	0	1	1	0
ggo_retrop02911	1	3	1	0	3	3
ggo_retrom00149	2	0	0	0	1	5
ggoiretrom14920	15	11	0	6	8	21
ggoiretrom26948	7	7	0	2	0	0
ggo_retrop02919	0	0	0	0	0	0
ggo_retrop02946	0	0	0	0	1	1
ggo_retrop04241	3	0	2	1	3	4
ggoiretrop24225	18	17	4	14	31	60
ggoiretrom23127	0	0	0	0	0	4
ggo_retrop04240	0	0	0	0	0	0
ggo_retrom03830	0	2	0	20	1	2
ggoiretrom23128	0	0	0	0	0	0
ggo_retrom01534	0	0	0	0	0	0
ggoiretrop35672	0	0	0	4	0	3
ggoiretrop35673	9	12	1	13	6	42
ggo_retrop04722	0	1	1	0	0	2
ggo_retrop01936	0	0	0	0	0	0
ggo_retrop01930	1	2	1	1	1	191
ggo_retrop01931	11	7	0	0	2	124
ggo_retrop01932	0	0	0	0	0	1
ggo_retrop02625	0	2	0	2	4	4
ggoiretrom27786	0	0	0	0	1	0
ggo_retrop02627	1	0	1	2	5	3
ggo_retrop04729	13	6	1	16	16	34
ggo_retrop01938	8	9	2	8	1	35
ggo_retrop01939	2	6	0	0	1	3
ggo_retrop02623	4	5	1	0	6	4
ggo_retrom01862	0	0	0	3	1	1
ggo_retrop04058	0	0	0	0	0	0
ggo_retrop04059	0	0	0	0	0	0
ggo_retrom00003	0	0	0	0	0	1
ggo_retrop04050	29	13	8	14	45	2
ggo_retrop04503	13	16	0	5	9	13
ggoiretrom30887	0	0	0	0	0	0
ggo_retrop04501	2	1	0	0	0	5
ggo_retrop04506	6	1	3	6	3	17
ggo_retrop04507	0	1	0	0	1	3
ggoiretrom23099	0	0	0	0	0	2
ggoiretrom03500	0	0	0	0	0	1
ggo_retrop00444	135	104	27	119	128	1877
ggoiretrom03507	1	0	0	0	26	1
ggoiretrom26998	4	0	0	0	0	3
ggoiretrop26974	0	0	0	1	1	0
ggo_retrop04290	1	0	0	0	0	0
ggo_retrop04291	2	1	0	2	0	9
ggo_retrop04296	0	0	0	0	0	0
ggo_retrop04294	1	1	0	0	1	3
ggoiretrop16056	4	1	0	2	6	4
ggo_retrop02823	1	7	0	1	1	0
ggo_retrop02821	0	0	0	0	0	0
ggo_retrop00991	1	1	0	0	2	4
ggo_retrom02182	5	6	0	2	2	5
ggoiretrom28529	60	71	22	89	79	294
ggo_retrom00489	2	0	0	0	0	3
ggo_retrop02829	0	0	0	0	0	0
ggo_retrop02828	0	0	0	0	0	0
ggoiretrom28522	0	0	0	0	0	1
ggoiretrop24421	0	3	2	4	0	7
ggo_retrop03118	0	0	0	0	0	0
ggo_retrom04819	0	0	0	0	0	0
ggo_retrom04818	3	17	8	31	29	50
ggo_retrop04618	5	5	1	1	90	1
ggo_retrop04619	0	0	0	4	0	0
ggo_retrop04616	1	0	0	0	0	3
ggo_retrop04617	74	78	17	78	125	275
ggo_retrom04811	0	2	0	0	0	1
ggo_retrom02342	0	0	0	1	0	1
ggo_retrop04613	22	18	8	44	31	52
ggo_retrom04815	0	0	0	0	0	0
ggo_retrop04611	311	201	83	384	292	693
ggo_retrop00759	1	0	0	17	7	0
ggoiretrom22702	0	0	0	0	0	0
ggoiretrom31439	368	238	240	978	898	1173
ggo_retrop00979	0	0	0	0	0	1
ggo_retrop00753	0	0	0	0	0	0
ggo_retrop00976	1	0	0	0	0	0
ggo_retrop00975	11	4	2	10	11	34
ggo_retrop00750	2	0	1	4	4	10
ggo_retrop00973	0	1	0	0	1	2
ggo_retrop00972	0	0	0	0	0	0
ggo_retrop00755	0	0	0	0	1	0
ggoiretrom07501	0	0	0	0	0	0
ggo_retrop01116	0	0	0	0	0	43
ggo_retrop01117	2	1	2	5	4	8
ggo_retrop04474	1	3	1	2	2	12
ggo_retrom00739	3	2	0	0	0	67
ggo_retrop04472	3	3	1	5	2	7
ggo_retrom01604	3	0	0	0	0	9
ggo_retrop01110	0	0	0	0	0	0
ggo_retrop01111	0	0	0	0	0	0
ggo_retrom01892	2	1	0	1	0	2
ggo_retrop00194	0	0	0	0	1	0
ggo_retrom00731	1	0	0	1	1	0
ggo_retrom03142	28	105	1	10	3	13
ggo_retrop04478	1	3	3	2	0	6
ggo_retrop04479	4	2	0	3	4	7
ggoiretrom06698	1	1	0	0	0	44
ggo_retrop04184	0	0	0	0	0	13
ggoiretrop02102	8	11	16	47	33	10
ggoiretrop33841	0	0	0	0	0	1
ggoiretrom01652	5	12	3	3	5	4
ggoiretrop23541	0	2	1	0	0	4
ggoiretrom23167	0	0	0	0	1	1
ggo_retrop03825	0	0	0	0	0	2
ggoiretrom08291	12	7	2	4	4	25
ggoiretrom31684	0	0	0	0	1	0
ggoiretrop20052	0	0	0	0	0	0
ggo_retrop02408	0	1	0	0	1	17
ggoiretrop11660	0	0	0	0	0	0
ggoiretrop28921	1	0	0	0	0	0
ggo_retrop00471	0	0	0	0	0	3
ggo_retrop00379	79	130	29	127	109	78
ggo_retrop00378	59	32	21	56	53	188
ggoiretrom30392	6	24	3	5	1	15
ggo_retrom03087	0	0	0	0	0	0
ggo_retrom01514	0	0	0	2	2	1
ggo_retrom03763	6	2	1	1	6	18
ggo_retrom01511	0	0	0	0	0	1
ggo_retrom01510	1	0	0	0	2	4
ggo_retrom04033	3	2	0	1	2	7
ggo_retrop00376	0	0	0	0	0	0
ggo_retrom00026	0	0	0	0	0	0
ggo_retrom00027	10	2	1	1	2	19
ggo_retrom00025	0	0	0	0	0	0
ggo_retrom00022	12	9	0	8	5	13
ggo_retrom00020	2	3	0	0	0	8
ggoiretrom06179	0	0	0	0	0	1
ggo_retrop01758	0	0	0	0	0	0
ggo_retrom00028	0	0	0	0	0	1
ggo_retrom00029	0	0	0	0	0	2
ggo_retrop02434	3	0	0	1	5	14
ggo_retrom03563	14	20	6	13	21	72
ggo_retrop02796	0	0	0	0	0	0
ggo_retrom02967	0	0	0	1	0	1
ggo_retrom02961	1	3	0	0	2	2
ggoiretrom04667	0	0	0	0	1	0
ggo_retrom02963	0	0	0	0	0	0
ggoiretrop25986	0	0	0	0	0	0
ggo_retrop02519	0	0	0	2	0	1
ggoiretrop09766	0	0	0	0	0	2
ggoiretrom04060	24	18	4	13	7	25
ggoiretrop23803	10	5	0	2	0	7
ggo_retrop02456	7	25	8	19	26	442
ggo_retrom00120	0	3	1	2	12	9
ggo_retrom00124	10	7	2	7	7	6
ggo_retrom04109	0	0	0	0	0	0
ggo_retrom04108	0	0	0	0	0	0
ggo_retrom03616	0	0	0	0	0	0
ggo_retrop00576	0	0	0	0	0	1
ggo_retrom03612	0	0	0	2	0	5
ggo_retrom00269	119	128	38	80	24	269
ggoiretrop31126	0	0	1	0	1	0
ggo_retrop00579	0	0	0	0	0	0
ggo_retrom04102	0	0	0	0	0	7
ggo_retrom03618	24	18	10	5	8	57
ggo_retrom04104	1	1	2	1	1	4
ggoiretrop26596	0	0	0	0	0	1
ggo_retrom04106	1	0	0	0	4	1
ggoiretrom08414	12	9	3	4	5	6
ggoiretrop09369	0	0	0	0	0	0
ggo_retrop02512	1	3	5	2	4	9
ggoiretrop32995	0	0	0	0	0	1
ggoiretrop23829	4	2	0	1	6	0
ggo_retrop00762	1	0	1	0	1	0
ggo_retrop02459	1	0	0	0	0	0
ggo_retrom01652	0	2	0	0	0	2
ggoiretrop26369	5	5	1	0	2	6
ggoiretrop11445	170	177	68	151	110	204
ggoiretrom30177	0	0	0	0	0	0
ggoiretrom11360	0	0	0	0	0	0
ggoiretrom25083	0	0	0	0	0	1
ggoiretrop11515	3	2	1	0	2	4
ggo_retrop03831	2	0	0	0	1	2
ggoiretrop09106	1	0	0	0	0	4
ggoiretrom00465	1	0	0	0	0	51
ggoiretrom30958	0	0	0	0	0	3
ggo_retrop00766	0	0	0	0	0	4
ggoiretrom25089	4	1	0	1	1	7
ggo_retrop03184	0	0	0	0	0	2
ggoiretrom24570	6	5	0	8	3	47
ggo_retrom04243	1	3	0	3	3	3
ggo_retrom04240	7	8	0	1	0	0
ggoiretrom24573	219	245	673	684	745	10642
ggoiretrop11401	1	0	0	0	0	0
ggoiretrom20899	0	0	0	0	0	0
ggo_retrom01187	0	0	0	0	3	17
ggo_retrop00765	1	0	0	5	3	1944
ggo_retrop00403	0	0	0	0	0	0
ggoiretrop04186	1	3	0	3	0	3
ggo_retrop00400	0	1	0	1	0	58
ggo_retrom03900	1	0	0	0	0	2
ggo_retrom03901	0	0	0	0	0	0
ggoiretrom28334	0	0	0	0	0	0
ggo_retrom03903	4	1	0	1	1	19
ggo_retrom03904	0	1	0	0	2	3
ggo_retrom03905	1	1	0	1	0	0
ggo_retrom03907	609	273	200	590	1244	456
ggo_retrom03908	0	0	0	0	0	0
ggo_retrom03909	0	0	0	1	0	0
ggoiretrom23205	19	11	4	31	37	63
ggoiretrom24682	0	0	0	0	0	5
ggoiretrop25397	0	0	0	0	0	0
ggo_retrom01183	0	0	0	0	0	0
ggoiretrom13671	0	0	0	0	0	0
ggo_retrop03426	39	11	1	5	14	2935
ggoiretrom08185	2	0	5	13	0	6
ggoiretrop07743	0	0	0	0	0	3
ggoiretrop13810	0	0	0	0	0	0
ggoiretrom19755	0	0	0	0	0	0
ggoiretrom19547	2	2	1	0	0	0
ggoiretrom08189	2	0	0	0	0	3
ggoiretrom10965	2	0	0	0	0	2
ggoiretrom10348	3	1	1	0	1	1
ggo_retrom03808	0	0	0	0	0	0
ggo_retrop00453	0	0	0	0	0	3
ggo_retrom02749	0	0	0	0	0	2
ggo_retrop03472	3	1	0	1	0	3
ggoiretrom05139	7	3	1	0	0	3
ggo_retrom02747	0	0	0	0	0	0
ggo_retrom02746	1	0	0	2	3	8
ggo_retrom02740	0	0	0	0	3	0
ggo_retrop04014	4	1	1	8	7	18
ggoiretrop15362	0	0	0	0	0	0
ggoiretrom07972	0	0	0	0	0	0
ggoiretrom18593	0	0	0	0	0	0
ggo_retrom01770	0	0	0	0	0	11
ggoiretrom11298	26	5	0	1	1	89
ggo_retrom01290	12	5	0	1	0	70
ggo_retrom01291	0	0	0	0	0	0
ggo_retrom02983	0	0	0	0	0	0
ggo_retrom01297	0	0	0	0	0	1
ggo_retrom02981	0	0	0	0	0	0
ggo_retrom02980	1	1	0	0	2	3
ggo_retrom00830	3	0	0	4	0	1
ggo_retrop01065	4	1	7	10	8	28
ggo_retrom00834	0	0	0	0	0	28
ggo_retrom00837	1	1	0	1	0	1
ggo_retrom00836	0	0	0	0	0	1
ggoiretrop28748	0	0	0	0	0	1
ggo_retrom00838	0	1	0	0	0	0
ggo_retrom03836	0	1	0	0	1	33
ggo_retrop03474	0	1	0	1	9	23
ggoiretrop37528	1	0	0	0	0	1
ggo_retrom03831	0	0	0	0	0	63
ggoiretrop20939	0	2	1	0	0	1
ggoiretrom06702	0	0	0	0	0	0
ggo_retrop02580	0	0	0	0	0	1
ggo_retrop02582	0	0	0	0	0	0
ggo_retrop02583	90	49	34	65	122	164
ggo_retrop02586	0	2	0	0	0	14
ggo_retrop03051	17	25	8	26	27	315
ggo_retrop03050	652	297	229	657	1315	1141
ggo_retrop04013	0	0	0	0	0	1
ggo_retrop02731	0	0	0	0	0	0
ggo_retrop03509	0	0	0	0	0	0
ggo_retrop03508	0	0	0	0	0	0
ggo_retrom02402	0	0	0	0	0	0
ggo_retrop03875	0	0	0	0	0	0
ggo_retrom03046	1	2	0	0	0	3
ggoiretrop38410	0	1	0	0	0	0
ggoiretrop14594	7	4	7	9	8	13
ggo_retrop03608	3	0	0	2	0	2
ggo_retrop02452	0	0	0	0	0	0
ggoiretrop14350	0	1	0	1	1	3
ggoiretrom11368	17	8	0	12	8	136
ggo_retrop03183	0	0	0	0	0	0
ggo_retrop03182	0	0	1	0	0	78
ggoiretrop35907	0	0	0	0	0	0
ggoiretrom11361	2	1	0	1	0	0
ggoiretrom12281	306	74	10	16	14	930
ggo_retrop03185	0	0	0	0	0	0
ggo_retrop04019	0	0	0	0	0	0
ggo_retrom01186	10	5	1	0	0	3
ggoiretrom07882	0	0	0	0	0	0
ggo_retrom01182	0	0	0	0	0	1
ggo_retrom00908	1	0	1	0	1	6
ggo_retrom01180	0	0	0	0	0	2
ggo_retrom01181	0	2	0	0	1	0
ggo_retrop03473	0	0	0	0	2	0
ggo_retrom00904	1	2	1	6	3	7
ggo_retrom00906	0	1	0	0	0	0
ggo_retrom00900	0	0	0	0	0	1
ggo_retrom00903	0	0	0	0	0	0
ggo_retrom00902	0	0	0	0	0	0
ggoiretrop31365	0	0	0	0	1	2
ggo_retrop03607	1	12	3	1	2	7
ggo_retrom04378	0	2	0	0	0	1
ggoiretrom13291	0	0	0	0	0	2
ggoiretrom35045	0	0	0	0	0	3
ggo_retrom02558	1	0	0	0	0	1
ggo_retrom03162	0	0	0	0	0	0
ggo_retrom03165	0	0	0	0	0	1
ggoiretrop31368	0	0	0	0	2	2
ggo_retrom03163	0	0	0	0	0	1
ggoiretrop06768	0	0	0	0	1	1
ggo_retrom03048	3	1	0	3	0	0
ggoiretrop15775	1	1	0	0	0	0
ggo_retrom03550	3	1	1	0	4	10
ggo_retrom02579	10	12	0	1	1	3
ggoiretrop29260	0	0	0	0	0	0
ggo_retrom02577	0	2	1	1	3	13
ggo_retrop04772	0	0	0	0	0	1
ggo_retrom02573	0	0	0	0	0	0
ggo_retrom03758	198	64	10	67	70	207
ggo_retrom02571	41	44	20	21	17	624
ggo_retrop01835	0	0	0	0	0	5
ggoiretrom26352	0	1	0	0	1	1
ggoiretrop15175	1	0	1	0	8	2
ggo_retrop01836	1	0	0	2	0	0
ggo_retrop01831	1	0	0	3	2	3
ggo_retrop03986	2	3	1	0	5	2
ggoiretrom27262	5	9	4	9	7	938
ggo_retrom01983	1	1	0	0	0	8
ggoiretrop34676	24	11	0	6	12	22
ggoiretrop30501	123	45	0	0	0	24
ggo_retrop03693	0	0	0	0	0	36
ggo_retrop02866	0	0	0	0	0	0
ggoiretrom34607	5	10	1	2	3	6
ggoiretrom34606	2	3	0	4	0	1
ggo_retrom03107	0	0	0	0	0	1
ggoiretrom20402	0	0	0	0	0	0
ggo_retrop02127	0	0	0	0	0	87
ggo_retrop01239	0	0	0	0	0	1
ggo_retrop01238	0	0	0	0	0	1
ggo_retrop02122	0	0	0	0	0	0
ggoiretrom09327	0	0	0	0	0	1
ggo_retrom03290	5	4	3	1	3	11
ggo_retrop01232	0	0	0	0	0	0
ggo_retrop01231	0	0	0	2	1	16
ggo_retrop01230	0	0	0	0	0	0
ggo_retrop01237	28	27	12	32	14	69
ggo_retrop01236	0	0	0	0	0	1
ggo_retrop01235	0	0	0	0	0	0
ggo_retrop02129	7	12	4	3	5	4
ggo_retrom02576	0	0	1	0	0	0
ggo_retrop02906	0	0	0	0	0	0
ggo_retrop02901	0	0	0	0	1	1
ggo_retrom03157	1	0	0	2	0	1
ggoiretrop06167	0	0	1	0	0	3
ggoiretrom32732	0	0	0	0	0	0
ggo_retrom02574	0	0	0	0	1	13
ggoiretrom26324	0	0	0	0	0	2
ggoiretrom26322	0	0	0	0	0	1
ggo_retrop03723	2	0	0	1	1	7
ggo_retrop02638	0	0	0	0	0	0
ggo_retrom01879	13	3	8	16	7	73
ggo_retrom02570	2	0	0	0	0	2
ggoiretrop36795	1	0	0	0	1	0
ggo_retrop02632	0	1	0	0	2	63
ggo_retrom01870	1	0	0	1	0	0
ggo_retrop02631	0	0	0	0	0	0
ggo_retrop02637	1	1	1	0	2	11
ggo_retrom01875	1	0	0	1	0	24
ggo_retrop04065	0	0	0	0	0	0
ggoiretrop16685	0	0	0	0	0	0
ggo_retrop04067	0	0	0	1	2	4
ggo_retrop04066	55	64	36	75	47	169
ggoiretrop32035	2	0	0	0	0	2
ggo_retrop04060	1	0	0	1	0	2
ggo_retrop04062	51	143	56	107	51	286
ggo_retrop03498	1	0	0	1	2	52
ggoiretrom30893	0	0	0	1	0	0
ggoiretrom28107	0	0	0	0	1	2
ggo_retrop04069	0	0	0	0	0	0
ggo_retrop04068	0	0	0	0	0	0
ggoiretrom06204	0	0	0	0	0	0
ggoiretrom30895	9	3	7	6	6	12
ggo_retrom03584	1	0	0	4	2	2
ggo_retrom03155	0	0	0	0	0	0
ggo_retrom03587	0	0	2	0	1	424
ggoiretrom35558	0	0	0	0	0	0
ggo_retrom03581	1	2	1	1	3	0
ggoiretrop15173	0	0	0	0	0	11
ggoiretrop31587	0	2	0	0	0	1
ggo_retrom03588	1381	1142	417	1064	1300	4505
ggoiretrop13039	0	0	0	0	0	1
ggo_retrom03063	1	0	0	0	0	0
ggo_retrom03346	0	0	0	0	0	1
ggo_retrop00983	0	1	0	0	0	3
ggo_retrom03344	0	1	0	0	0	0
ggo_retrop00981	0	0	0	2	0	21
ggo_retrop02834	0	0	0	0	0	5
ggo_retrop02835	2	0	1	0	3	2
ggo_retrop00984	1	1	0	0	0	2
ggo_retrom03341	85	99	117	246	203	319
ggo_retrop02838	0	0	0	3	0	3
ggo_retrop02839	1	0	0	0	0	0
ggo_retrom02198	2	0	0	0	1	1
ggo_retrom02199	0	2	0	0	1	10
ggo_retrom03348	0	1	0	1	0	31
ggo_retrom03349	0	0	0	0	0	1
ggo_retrom02356	1	4	0	0	0	7
ggo_retrom03345	0	0	0	2	2	1
ggo_retrom01607	0	0	2	0	1	0
ggo_retrom02353	0	0	0	0	0	8
ggo_retrom02350	1	6	1	1	3	4
ggoiretrom12328	0	0	0	1	0	0
ggoiretrop24942	1	0	0	0	0	0
ggo_retrom04805	0	0	0	0	0	0
ggo_retrom04806	0	0	0	0	0	9
ggo_retrom02359	2	2	3	18	23	18
ggo_retrop00748	0	0	0	2	1	11
ggo_retrop00749	3	1	0	7	20	13
ggo_retrom03842	229	4	0	10	12	61
ggoiretrom11722	4	0	0	16	9	0
ggo_retrop00969	5	6	1	1	3	9
ggo_retrom01618	0	0	0	0	0	0
ggo_retrom01619	0	0	0	0	0	19
[truncated: 2,642 more rows]

## Sheet: Orangutan
# Supplemental Table S2: Retrocopy expression (≥1 unique read) in orangutan
# The number of unique reads refers to those mapped in all samples from the same organ
# The number of unique reads mapping on each retrocopy locus (as defined in Supplemental Table S1) was obtained using the CoverageBed function from the Bedtools suite.
retro_ID	Brain	Cerebellum	Heart	Kidney	Liver	Testis
ppy_retrom15086	0	0	0	0	0	0
ppy_retrop07402	8	1	8	19	13	2061
ppyiretrop33567	1	2	0	2	1	6
ppy_retrop16172	1	0	0	0	0	0
ppy_retrop00694	1	0	0	3	0	0
ppy_retrom15081	1	1	2	0	2	12
ppyiretrom23629	1	0	2	5	1	18
ppyiretrom34190	0	1	1	1	0	0
ppy_retrom15088	0	0	0	0	0	2
ppy_retrop02466	0	0	0	0	0	0
ppyiretrom07541	1	1	0	3	3	4
ppy_retrom06812	3	6	8	5	3	1
ppy_retrop01054	0	0	0	0	0	0
ppy_retrop04572	3	1	0	0	0	2
ppyiretrop41264	0	0	0	0	0	0
ppy_retrop07407	0	1	2	6	4	6
ppy_retrop08076	0	0	0	0	0	4
ppyiretrop02747	1	2	1	0	0	0
ppy_retrop18052	12	4	13	16	12	0
ppy_retrom00100	232	141	108	71	31	110
ppy_retrom14974	0	2	0	0	0	0
ppy_retrop08070	0	0	0	0	0	0
ppy_retrop14038	24	2	10	43	24	4
ppy_retrom15150	0	0	1	0	0	6
ppyiretrom12079	4	0	0	0	0	0
ppy_retrop10265	0	0	0	0	0	1
ppyiretrop33964	2	1	0	3	2	18
ppyiretrop12773	0	0	1	0	0	0
ppy_retrop14030	0	0	0	0	0	0
ppy_retrom12575	0	0	0	0	1	0
ppy_retrom09913	0	1	0	0	0	1
ppyiretrop03313	0	0	0	0	0	0
ppy_retrom09915	0	0	0	0	0	0
ppy_retrom09914	4	1	0	0	6	15
ppyiretrop23694	0	0	0	0	0	0
ppy_retrom09919	0	0	0	0	0	0
ppyiretrom06392	4	1	1	4	1	12
ppy_retrom15396	11	39	2	3	2	117
ppy_retrom02113	0	0	0	0	0	4
ppy_retrom13463	0	0	0	0	1	0
ppyiretrom20597	0	0	0	0	0	0
ppyiretrop18006	0	0	0	0	0	5
ppy_retrop10517	0	0	0	0	0	0
ppy_retrop10510	0	0	0	0	0	0
ppy_retrop14281	5	2	0	2	0	33
ppy_retrop07279	0	1	0	0	0	1
ppy_retrom10912	0	0	0	0	0	0
ppy_retrom05912	0	0	0	0	0	0
ppy_retrop10864	0	0	0	1	0	0
ppy_retrop10865	0	0	0	0	0	0
ppy_retrop11511	0	0	0	0	0	0
ppyiretrop09385	30	27	25	40	40	32
ppy_retrop10862	0	1	0	0	0	0
ppyiretrom07899	0	0	0	0	0	0
ppy_retrom13962	94	24	105	105	56	0
ppyiretrom29508	0	0	2	0	0	2
ppyiretrop35060	0	1	0	0	0	1
ppyiretrom37812	0	0	0	0	0	0
ppyiretrom32311	10	2	0	0	0	7
ppy_retrop10198	0	3	0	0	1	11
ppyiretrom03446	0	0	0	0	0	1
ppy_retrom01694	0	0	0	0	0	0
ppy_retrom11658	0	0	0	0	0	0
ppy_retrom00217	0	0	1	0	1	0
ppy_retrom10704	0	0	1	1	0	3169
ppy_retrom06966	4	1	7	19	24	12
ppy_retrom11653	1	0	0	0	0	4
ppy_retrom11651	0	0	0	4	0	12
ppyiretrop10498	0	0	0	0	0	2
ppy_retrop10194	0	0	0	0	0	0
ppy_retrop10195	0	0	0	0	0	4
ppy_retrom11654	0	0	0	0	0	2
ppyiretrom30258	0	0	0	0	0	0
ppy_retrop07879	2	5	7	19	18	70
ppyiretrop03959	1	0	1	5	1	0
ppy_retrom15572	0	1	0	0	0	0
ppyiretrop27062	0	0	0	0	0	0
ppy_retrom01316	0	0	0	0	0	1
ppy_retrop07873	0	0	0	0	0	0
ppyiretrop12375	0	0	0	0	0	0
ppy_retrop07871	0	0	0	0	0	0
ppy_retrop10463	5	0	1	134	0	2
ppy_retrop10464	3	3	1	4	4	3
ppy_retrop10466	0	1	0	2	0	0
ppy_retrom18264	0	0	1	1	0	2
ppy_retrop16107	0	0	1	0	1	1
ppy_retrom11470	0	0	0	0	1	0
ppy_retrom18261	0	0	1	0	0	0
ppy_retrop16100	1	0	1	1	0	0
ppy_retrom07004	0	0	1	0	0	0
ppyiretrom19417	0	0	0	0	0	0
ppy_retrop11483	1	0	0	0	0	25
ppy_retrom11478	0	0	0	0	1	0
ppy_retrop11485	1	1	0	1	0	17
ppy_retrom02803	0	0	0	0	1	1
ppy_retrom09173	0	0	0	0	0	3
ppy_retrom18064	0	0	0	0	0	0
ppy_retrom00246	2	0	7	7	3	2
ppy_retrom01311	0	0	0	0	0	0
ppyiretrom28621	0	0	0	0	0	0
ppy_retrop19124	1	0	0	0	0	0
ppyiretrom01910	0	0	0	0	1	2
ppy_retrop05989	0	0	0	0	0	0
ppy_retrop19123	1	1	0	0	0	9
ppy_retrop19120	5	0	1	249	3	56
ppy_retrom05866	5	1	2	2	1	4
ppy_retrop12822	0	0	0	0	0	0
ppy_retrom01341	0	0	0	0	0	0
ppyiretrom36542	1	0	0	1	0	0
ppyiretrop21906	3	0	0	3	0	0
ppy_retrop12826	2	4	4	3	7	14
ppy_retrom10678	0	0	0	1	0	0
ppy_retrop16579	1	2	0	0	0	0
ppyiretrom30184	1	0	0	1	0	0
ppy_retrom17957	0	0	0	0	0	0
ppy_retrom05770	0	3	0	1	0	7
ppy_retrom10675	0	0	0	0	0	0
ppyiretrom30180	0	0	0	0	0	2
ppy_retrom10673	0	0	0	0	0	0
ppy_retrom11279	0	0	0	0	0	2
ppy_retrop10685	0	0	0	0	0	0
ppy_retrop10686	0	0	0	0	0	5
ppy_retrop10680	0	0	2	2	0	1
ppy_retrop10681	5	7	3	12	8	6
ppy_retrom16288	1	0	0	0	0	0
ppyiretrom12294	0	0	0	0	0	0
ppy_retrop11021	0	0	0	0	0	0
ppyiretrom09969	6	4	3	2	1	4
ppy_retrop16152	0	0	0	0	0	2
ppy_retrom11276	0	0	0	0	0	0
ppy_retrop12228	1	11	18	16	2	2
ppy_retrom11028	1	0	0	0	0	2
ppyiretrop19660	0	0	0	0	0	5
ppy_retrop06172	1	0	0	0	0	0
ppyiretrom41808	0	3	6	3	0	4
ppyiretrop34183	0	0	0	0	0	9
ppy_retrop12222	0	0	0	0	0	0
ppy_retrom11504	2	0	0	1	1	2
ppy_retrop12224	5	8	0	0	0	2
ppy_retrom17009	0	0	1	0	1	2
ppyiretrom04870	0	0	1	0	0	0
ppy_retrom01215	0	0	0	0	5	0
ppy_retrop16213	0	0	0	0	0	0
ppy_retrom18600	5	7	1	10	3	8
ppyiretrom38786	0	0	1	0	0	0
ppy_retrom09004	1	2	1	0	1	18
ppy_retrop16572	5	4	8	8	30	11
ppy_retrop07053	0	0	0	0	0	0
ppy_retrom09000	1	0	0	0	0	0
ppyiretrop41107	0	0	0	0	0	1
ppyiretrom11665	0	0	0	0	0	0
ppy_retrom10459	0	0	0	0	0	0
ppyiretrom30233	0	1	1	3	1	1
ppy_retrop06202	1	0	4	7	3	16
ppy_retrop19013	0	0	0	0	0	1
ppy_retrop14131	4	3	0	6	1	88
ppyiretrom03061	1	1	0	1	0	17
ppy_retrop19017	0	0	0	0	0	0
ppyiretrop29562	0	0	1	0	0	0
ppy_retrom10455	0	0	1	0	0	0
ppyiretrom25032	0	0	0	0	0	1
ppy_retrop18542	0	0	0	0	0	0
ppyiretrop04317	0	0	0	0	0	0
ppyiretrom03817	0	0	0	0	0	2
ppyiretrom19475	58	18	22	64	134	0
ppy_retrom05957	0	0	0	0	0	0
ppy_retrop18058	1	0	0	0	0	0
ppy_retrom17711	0	0	1	6	4	0
ppy_retrop18549	2	1	1	1	1	5
ppy_retrom17713	0	1	0	3	9	0
ppy_retrop09843	0	0	0	1	0	0
ppyiretrop07664	0	0	0	0	0	0
ppyiretrom19306	2	0	0	0	0	2
ppy_retrop12590	3	0	0	1	0	3
ppy_retrom15153	0	0	0	0	0	0
ppy_retrom16443	20	8	8	43	12	67
ppyiretrop38578	0	0	0	0	0	2367
ppy_retrom16441	0	0	0	0	0	0
ppy_retrop12595	0	0	0	0	0	0
ppyiretrop12950	0	0	0	0	0	0
ppyiretrom42179	0	0	0	3	1	0
ppy_retrom16993	7	6	3	4	3	1
ppy_retrom11441	0	0	0	0	1	0
ppy_retrop16071	58	19	84	95	100	74
ppy_retrom17293	0	0	0	0	0	5
ppy_retrom16997	0	0	0	1	0	0
ppyiretrom02951	0	0	0	0	0	0
ppy_retrop17156	0	0	0	0	0	0
ppy_retrom17135	1	0	0	0	0	1
ppyiretrop08317	0	1	0	1	1	7
ppy_retrom17138	0	0	0	1	0	4
ppy_retrom18116	0	0	0	0	0	7
ppy_retrom18115	0	2	4	1	1	3
ppyiretrom21083	2	1	1	3	3	4
ppyiretrom10428	1	0	7	12	18	16
ppy_retrom18111	0	0	0	0	0	0
ppy_retrop16092	2	0	0	1	0	3
ppy_retrom01111	0	0	0	0	2	0
ppy_retrop07128	1	0	0	0	0	0
ppy_retrop13611	1	1	0	0	0	0
ppyiretrop29592	240	167	586	894	1129	0
ppy_retrom01114	7	0	0	0	1	1
ppy_retrom18288	0	0	0	0	0	0
ppy_retrom18286	0	0	1	0	0	0
ppyiretrop11456	2	0	0	1	1	1
ppyiretrop35393	0	0	0	0	0	0
ppy_retrom18281	0	0	0	0	1	6
ppy_retrop19307	0	0	0	1	0	11
ppy_retrom16539	4	1	0	1	9	0
ppy_retrom15399	2	0	0	0	0	2
ppy_retrom15200	0	0	0	0	0	0
ppy_retrop15864	1	0	0	1	1	0
ppy_retrom16372	0	0	1	0	1	1
ppy_retrom16530	0	0	1	1	1	0
ppy_retrom10298	2	5	5	3	4	9
ppy_retrop19308	2	3	1	3	1	4
ppyiretrom16978	0	0	0	0	0	0
ppy_retrop13775	0	0	0	0	0	0
ppy_retrop13771	0	0	0	0	0	1
ppy_retrom16666	0	0	0	1	0	2
ppy_retrop13773	0	0	0	0	1	0
ppyiretrop26070	0	2	0	1	1	0
ppy_retrop13953	1	0	1	3	1	0
ppyiretrom29723	1	0	0	0	0	6
ppyiretrom02486	0	0	0	0	0	0
ppy_retrop14393	0	0	0	0	0	2
ppy_retrop17410	0	0	0	0	0	1
ppy_retrom15392	1	0	0	0	0	0
ppyiretrom08152	130	149	257	225	267	0
ppy_retrom13018	0	0	0	0	0	0
ppy_retrom01154	7	3	1	1	3	10
ppy_retrop12175	0	0	0	0	0	8
ppy_retrop17417	0	0	0	0	0	1
ppy_retrom13013	0	0	0	0	0	0
ppy_retrop12179	1	0	1	0	0	5
ppy_retrom17226	0	0	0	0	0	0
ppy_retrom17220	0	0	0	0	0	0
ppy_retrom15390	7	0	8	3	4	0
ppy_retrom13015	1	0	0	0	0	1
ppyiretrop04446	0	0	0	0	0	0
ppyiretrop39132	0	0	0	0	0	0
ppyiretrom10333	43	51	17	41	11	31
ppy_retrom13763	0	0	0	0	0	0
ppy_retrom13969	0	1	0	0	0	13
ppyiretrop15357	0	0	0	0	0	0
ppy_retrop13882	0	0	0	0	2	0
ppyiretrop09863	0	0	0	1	0	5
ppyiretrop15352	0	0	0	0	0	0
ppyiretrop37139	0	0	0	0	0	24
ppy_retrom16285	0	0	0	0	0	0
ppy_retrom15118	0	0	0	0	0	0
ppy_retrop16323	32	7	35	13	28	9
ppy_retrom05101	0	0	0	1	2	0
ppy_retrom16281	0	0	0	0	0	0
ppy_retrop11587	1	0	0	0	0	0
ppy_retrom01076	0	0	0	0	0	0
ppyiretrop37801	0	1	0	0	0	0
ppy_retrom15395	0	0	0	0	0	0
ppy_retrom16289	0	0	0	0	0	0
ppy_retrop01864	0	0	0	0	0	2
ppyiretrop04043	0	0	0	4	1	0
ppy_retrop02733	0	0	0	0	0	0
ppyiretrop27999	1	0	1	1	0	0
ppyiretrop13046	3	0	6	0	1	0
ppy_retrom06566	0	1	0	1	0	0
ppy_retrop18070	0	0	0	0	0	0
ppyiretrom35674	0	0	0	0	0	0
ppy_retrop02735	0	0	0	0	0	1
ppy_retrop06394	0	0	0	1	0	0
ppy_retrop13091	1	0	0	0	0	1
ppy_retrop06233	0	1	0	0	1	2
ppy_retrop06982	7	1	5	23	10	0
ppy_retrom01978	1	4	0	2	0	1
ppy_retrop06236	0	0	0	0	1	137
ppy_retrom16063	0	4	0	0	2	131
ppyiretrom17034	0	0	0	0	0	0
ppy_retrop05889	49	5	3	13	1	65
ppyiretrom36349	2	0	0	0	0	0
ppy_retrop14648	0	0	0	0	0	0
ppy_retrop07276	0	0	0	0	0	0
ppy_retrom06761	1	1	3	2	2	11
ppyiretrom13023	1	3	1	3	4	12
ppy_retrop12772	3	1	1	6	2	0
ppyiretrop07085	0	0	0	0	0	2
ppy_retrom16265	0	0	0	0	1	0
ppy_retrom00661	0	0	0	0	0	0
ppyiretrom28386	0	0	1	0	0	0
ppyiretrom00300	1	0	0	0	0	0
ppy_retrom13127	10	2	3	6	2	0
ppyiretrop34124	0	1	1	0	1	3
ppy_retrom02475	0	0	0	0	0	2
ppy_retrom01079	0	0	0	0	0	0
ppy_retrom02473	0	0	0	0	0	0
ppyiretrop03230	5	0	0	3	0	2
ppy_retrom15079	7	0	1	2	1	0
ppy_retrop01267	0	0	0	0	0	0
ppy_retrop16559	0	1	0	3	0	0
ppy_retrop02427	1	0	9	0	0	0
ppy_retrop02354	0	0	0	0	0	1
ppy_retrom12883	1	0	1	0	0	7
ppy_retrop02422	0	0	0	0	1	4
ppyiretrop10803	12	6	4	1	11	26
ppy_retrop04814	0	0	0	0	0	0
ppy_retrop16308	0	0	0	1	2	6
ppy_retrop13824	0	0	0	0	0	0
ppy_retrom06366	0	0	0	0	0	0
ppy_retrop02429	8	0	0	0	1	55
ppy_retrop11469	0	0	0	0	0	0
ppyiretrop25682	4	1	7	3	5	272
ppyiretrom29874	1	1	3	0	3	6
ppyiretrom04182	0	0	0	0	0	2
ppyiretrom35071	7	6	3	3	6	14
ppy_retrom07364	0	0	0	0	0	0
ppy_retrom11025	0	1	1	0	0	0
ppyiretrop06202	1	0	0	0	0	4
ppy_retrop00062	0	0	1	0	0	0
ppy_retrop18949	0	0	0	0	0	0
ppy_retrop18946	0	0	0	0	0	2
ppy_retrop16842	3	4	0	2	1	0
ppy_retrop05186	0	0	0	0	0	0
ppy_retrop05181	2	1	0	0	0	2
ppy_retrop13294	0	0	0	0	0	0
ppy_retrop18003	0	0	2	3	2	0
ppyiretrop27845	197	137	122	173	139	174
ppy_retrop09192	2	2	0	0	2	5
ppy_retrom10002	3	2	3	3	8	4
ppyiretrop33491	121	24	21	37	8	143
ppy_retrom11877	0	0	0	0	0	0
ppy_retrop07144	0	0	0	1	0	3
ppyiretrop35724	0	0	0	0	2	0
ppyiretrom33852	0	0	0	0	0	0
ppy_retrop13790	1	0	0	0	0	0
ppy_retrom13723	0	3	0	0	0	1
ppy_retrom02585	0	1	0	0	0	0
ppy_retrom07567	0	0	0	0	0	0
ppy_retrom07564	0	0	0	0	0	0
ppyiretrop11195	0	0	0	0	0	3
ppy_retrom05672	0	0	0	0	0	2
ppy_retrom07184	0	0	0	0	0	0
ppyiretrom35296	0	0	0	0	0	0
ppy_retrom08757	0	0	0	0	0	0
ppy_retrom07180	3	5	0	3	0	1
ppy_retrop01428	0	2	0	0	0	0
ppy_retrop00112	0	0	0	0	0	1
ppy_retrom01152	5	6	4	5	6	3
ppy_retrop06927	15	0	9	4	7	161
ppy_retrom07189	1	0	0	3	1	0
ppyiretrop24979	6	4	11	12	11	125
ppyiretrop07926	0	0	0	0	0	0
ppy_retrop05769	0	0	0	1	0	0
ppy_retrom00535	0	0	0	0	0	0
ppy_retrom00536	0	0	0	0	0	0
ppy_retrom00530	20	2	0	1	0	1
ppy_retrop07022	0	0	0	0	0	13
ppy_retrom07740	13	3	9	17	18	37
ppy_retrom07213	1	2	2	0	0	3
ppy_retrop07023	3	1	0	0	0	0
ppy_retrom15766	4	6	8	1	5	2
ppyiretrom35109	16	5	3	5	7	14
ppyiretrom09093	0	0	0	1	1	4
ppy_retrop14331	4	26	5	5	6	11
ppy_retrop14332	1	0	0	0	0	103
ppyiretrop39095	5	1	5	11	13	8
ppy_retrop13710	0	1	0	0	0	0
ppy_retrom16459	0	0	0	0	0	0
ppyiretrop12566	247	71	330	367	346	114
ppy_retrop05290	0	0	0	0	0	0
ppy_retrom06585	0	1	0	0	0	0
ppy_retrom02056	1	0	0	0	0	0
ppyiretrom23104	2	0	2	3	2	0
ppy_retrop17650	0	0	0	1	0	2
ppy_retrop05297	0	0	0	0	0	2
ppy_retrom07699	0	0	0	0	0	0
ppy_retrom08639	7	4	10	11	12	7
ppyiretrom19524	0	0	0	0	0	0
ppy_retrom12290	0	1	4	0	6	0
ppy_retrop15120	0	0	0	0	0	4
ppy_retrom13834	1	0	0	0	0	2
ppy_retrom08630	0	2	0	0	0	0
ppy_retrom12528	0	1	0	0	0	1
ppy_retrom08980	0	0	0	0	0	0
ppy_retrom08635	1	0	0	0	2	0
ppy_retrom02290	0	0	0	0	0	0
ppy_retrom08562	0	0	0	0	1	0
ppy_retrom08561	0	0	0	0	0	0
ppyiretrop10551	1	3	1	2	3	3
ppyiretrop17276	1	0	0	0	0	4
ppyiretrom26422	0	1	0	0	2	1
ppyiretrom23633	0	2	2	0	0	0
ppyiretrop16677	0	0	0	0	0	0
ppy_retrop17655	13	0	1	1	0	119
ppyiretrom11888	0	0	0	1	1	1
ppy_retrop16738	0	0	0	0	0	0
ppyiretrom07637	0	0	0	0	3	0
ppyiretrom30751	1	1	1	0	0	1
ppy_retrom04988	2	9	0	2	1	15
ppyiretrop41294	0	0	0	0	0	0
ppy_retrom06806	0	0	0	2	0	0
ppyiretrom29056	0	0	0	0	0	0
ppy_retrop01512	0	0	0	0	0	0
ppy_retrop18047	0	0	0	0	0	0
ppy_retrop04566	0	0	0	0	0	0
ppy_retrom04985	1	1	0	4	11	14
ppyiretrom32998	1	0	0	0	0	0
ppy_retrop11909	0	0	0	0	1	0
ppyiretrop24796	0	0	0	0	1	0
ppyiretrom40325	1	0	0	0	0	4
ppy_retrop10218	449	131	153	142	58	6
ppy_retrop08007	0	0	0	0	0	1
ppy_retrom06967	0	0	2	9	2	10
ppyiretrop02544	0	0	0	0	0	0
ppy_retrom15609	4	1	7	1	7	3
ppy_retrop14024	0	0	0	0	0	0
ppy_retrop11171	0	0	0	1	0	0
ppy_retrop01757	0	0	0	0	0	0
ppy_retrom10902	0	0	0	2	2	0
ppyiretrop39682	0	0	0	0	0	0
ppy_retrom15366	0	0	0	0	3	0
ppy_retrop10940	0	0	0	0	0	0
ppy_retrom15364	0	0	1	0	1	0
ppy_retrom12744	0	0	0	9	0	2
ppy_retrom12745	6	1	19	31	35	0
ppy_retrop01198	1	0	0	1	0	1
ppy_retrop01199	0	0	1	0	0	6
ppy_retrop13708	1	0	0	1	2	2
ppy_retrom02124	9	1	2	2	1	15
ppy_retrop07914	0	0	0	0	0	1
ppy_retrop10520	0	0	0	0	0	7
ppy_retrop10522	0	0	0	0	0	0
ppy_retrop10525	0	0	0	0	0	0
ppy_retrop07913	0	0	0	0	0	1
ppy_retrom15187	0	0	1	0	0	0
ppy_retrop07269	1	0	0	0	1	0
ppy_retrop07918	1	2	1	0	0	2
ppy_retrop00240	1	1	0	1	3	0
ppy_retrop07464	15	2	0	0	1	4
ppyiretrop13596	3	1	0	0	0	5
ppyiretrom38073	6	0	0	0	0	0
ppy_retrop10857	0	0	0	2	0	0
ppy_retrom06979	0	0	0	0	0	4
ppy_retrop10859	0	0	0	0	0	0
ppyiretrom28041	62	49	40	41	44	154
ppy_retrop17952	1	1	0	0	0	3
ppy_retrop07468	49	10	12	34	21	0
ppy_retrom03453	0	0	0	4	3	1
ppy_retrom03450	4	3	4	8	1	5
ppy_retrop14641	0	1	0	0	0	0
ppy_retrop09615	1	0	0	0	0	1
ppyiretrop08191	0	0	1	0	0	2
ppyiretrop02438	0	0	0	0	0	8
ppy_retrom10846	0	0	0	0	0	2
ppyiretrop32197	2	2	1	1	0	0
ppy_retrom15574	1	3	0	1	0	2
ppy_retrom11646	10	5	10	10	19	10
ppy_retrop07868	247	90	221	555	676	867
ppy_retrop07869	1	1	1	0	0	1
ppyiretrop32558	0	0	0	0	0	0
ppyiretrom01635	194	83	32	27	15	18
ppy_retrop10450	0	1	0	0	0	0
ppy_retrop10452	0	2	0	4	0	16
ppy_retrop07860	2	4	3	1	3	34
ppy_retrop07862	0	0	0	0	1	7
ppyiretrop12342	3	1	1	1	3	5
ppyiretrop02942	0	0	0	0	0	0
ppyiretrop14816	0	0	0	0	0	0
ppy_retrom18272	0	0	0	0	0	0
ppy_retrop16113	0	0	0	0	0	2
ppy_retrom02879	0	1	2	3	5	2
ppy_retrop11495	0	2	2	2	0	6
ppyiretrop15819	1	0	3	1	0	13
ppy_retrom18277	1	0	0	0	0	1
ppy_retrop11490	542	291	398	376	462	334
ppy_retrop06967	0	0	0	0	0	0
ppy_retrom02873	1	1	0	2	1	5
ppy_retrom02871	1	1	0	0	0	50
ppy_retrop10144	1	2	1	1	1	29
ppyiretrom36903	0	0	0	0	0	0
ppy_retrom02875	0	1	0	1	0	7
ppy_retrop17437	19	18	1	1	1	10
ppy_retrop05992	0	0	0	0	0	0
ppy_retrop13071	0	5	0	1	0	5
ppy_retrom09163	0	0	0	0	0	0
ppy_retrom18071	0	2	1	1	1	5
ppy_retrom18073	121	51	106	93	451	16
ppy_retrom10593	0	0	0	0	0	0
ppy_retrom10592	5	8	2	10	15	12
ppyiretrom39314	0	0	0	1	0	0
ppy_retrom10590	0	0	0	1	0	0
ppy_retrom10597	0	0	0	0	0	0
ppy_retrom11097	1	1	3	2	1	3
ppy_retrom10595	1	1	2	6	5	2
ppy_retrom02094	2	0	0	0	0	1
ppy_retrop01468	0	0	0	0	0	0
ppy_retrop08903	0	1	0	1	2	5
ppy_retrop08900	15	20	46	92	44	3
ppy_retrom10608	0	1	1	0	0	4
ppy_retrop08907	0	0	0	0	0	0
ppy_retrop08904	0	0	0	0	1	0
ppy_retrop08908	0	0	0	0	0	4
ppy_retrom10600	0	0	0	0	1	640
ppyiretrop19856	2	0	1	1	3	21
ppy_retrop00646	1	0	0	1	0	4
ppyiretrop05011	0	0	0	0	0	0
ppy_retrom02312	0	0	1	0	0	14
ppyiretrom33612	0	0	0	0	0	0
ppyiretrop23221	0	2	1	1	1	3
ppy_retrop11030	0	3	2	1	1	24
ppy_retrom15216	0	0	0	2	1	0
ppy_retrop11032	0	1	0	0	0	0
ppy_retrom15213	0	0	0	0	0	2
ppy_retrom15212	3	1	15	6	7	0
ppyiretrom40141	0	0	1	2	2	1
ppyiretrom08379	0	0	0	0	0	157
ppyiretrop08544	3	0	4	6	0	11
ppy_retrom10022	0	0	0	0	0	0
ppy_retrop11142	0	1	0	0	2	0
ppy_retrom10020	0	0	0	0	0	0
ppy_retrom11519	0	0	0	0	0	0
ppyiretrom39952	0	0	0	0	1	0
ppy_retrom10682	0	0	0	0	0	0
ppy_retrop16206	1	0	0	0	0	0
ppy_retrom17201	0	0	0	0	1	0
ppyiretrop28207	2	27	0	1	0	0
ppy_retrop16203	0	0	0	0	0	0
ppy_retrom16447	0	1	0	0	0	0
ppy_retrop16201	0	0	0	0	0	0
ppy_retrom05844	0	0	0	0	0	0
ppy_retrop15268	0	0	0	0	0	0
ppy_retrom02905	0	0	0	0	0	0
ppyiretrom04089	3	3	3	0	0	0
ppy_retrom18614	2	0	0	0	0	21
ppyiretrom00506	0	0	0	0	0	0
ppy_retrom02901	0	0	0	0	0	0
ppy_retrom02900	0	0	0	1	0	0
ppy_retrom09015	0	0	0	0	0	0
ppy_retrop13660	0	0	0	0	0	1
ppy_retrom09011	1	0	0	0	0	8
ppy_retrom02909	0	0	0	0	0	0
ppy_retrom09013	0	0	0	0	0	17
ppy_retrom13303	11	0	0	1	0	192
ppy_retrom11105	0	0	0	0	0	0
ppyiretrop41111	1	3	0	0	0	15
ppy_retrom01617	0	0	0	1	0	0
ppy_retrop16637	0	0	0	0	0	0
ppyiretrop09093	6	0	0	1	0	1
ppyiretrop26125	179	128	468	701	528	2
ppy_retrop14101	0	0	0	0	1	0
ppy_retrop07281	0	0	1	0	0	6
ppyiretrom39556	2	3	2	0	0	38
ppy_retrop16001	1	2	0	2	4	0
ppyiretrom39829	0	0	0	0	0	2
ppy_retrop16680	0	0	0	0	0	0
ppy_retrom17721	1	0	0	2	0	0
ppy_retrom17723	0	0	0	2	2	2
ppy_retrom17722	0	4	0	0	0	1
ppyiretrom39821	0	0	0	0	0	1
ppy_retrop16688	0	0	0	0	0	1
ppy_retrom17729	0	0	0	0	0	0
ppy_retrom05446	5	13	4	3	3	1
ppy_retrom16455	119	110	112	178	98	279
ppy_retrop14504	2	0	9	2	2	10
ppyiretrom15898	0	0	0	0	0	0
ppy_retrom16451	0	0	0	0	0	0
ppy_retrom10339	0	0	0	0	0	0
ppy_retrom10338	0	0	0	0	0	0
ppy_retrom17105	0	0	0	0	0	0
ppy_retrom02969	0	0	0	1	0	2
ppyiretrop36818	1	0	0	0	0	1
ppy_retrom10332	0	0	0	0	1	0
ppy_retrop17792	19	8	7	18	12	10
ppy_retrom05111	0	0	0	0	0	0
ppyiretrop05876	0	0	6	0	1	0
ppy_retrop07091	47	14	5	8	3	87
ppy_retrop16664	7	4	6	4	6	5
ppy_retrom17032	0	0	0	0	0	0
ppy_retrop17799	0	11	0	0	0	0
ppyiretrom34060	0	0	1	1	1	0
ppy_retrom18101	0	0	2	0	0	2
ppyiretrom04268	0	0	0	0	0	0
ppy_retrom18103	0	0	0	0	0	0
ppy_retrom16147	0	0	0	0	0	0
ppyiretrom34532	351	242	732	1176	1526	633
ppy_retrop07133	0	0	1	0	0	0
ppyiretrom00189	0	0	0	2	0	0
ppy_retrom00982	0	0	0	0	0	7
ppy_retrom18294	0	1	0	2	6	16
ppy_retrom15215	1	0	0	6	1	0
ppy_retrop13852	0	0	0	0	0	0
ppy_retrom18292	0	0	0	0	0	0
ppy_retrom17581	1	0	0	0	0	0
ppy_retrom17852	0	0	0	0	1	0
ppy_retrop17647	0	0	2	0	0	0
ppy_retrom03998	0	0	0	0	0	0
ppy_retrom17857	0	0	0	0	0	0
ppy_retrom15139	1	0	0	0	0	0
ppy_retrom17855	0	0	0	0	0	0
ppy_retrom17588	0	0	0	0	0	0
ppy_retrom17859	0	0	0	0	0	0
ppy_retrop17649	0	0	3	1	0	5
ppy_retrom16525	0	0	1	0	0	1
ppy_retrom16526	0	0	0	0	0	0
ppyiretrom07059	405	144	171	366	570	674
ppy_retrom16670	0	0	0	1	1	0
ppy_retrom16672	105	71	169	79	151	3
ppy_retrop16397	4	3	3	1	1	3
ppy_retrop02202	0	0	0	0	0	0
ppy_retrop17428	0	0	0	0	0	0
ppy_retrom00969	0	0	0	0	0	0
ppy_retrom16677	15	3	5	13	12	0
ppy_retrom00967	0	0	0	1	0	0
ppy_retrop06422	13	0	0	0	0	0
ppy_retrop13853	0	0	0	0	0	0
ppy_retrop06420	0	0	0	6	1	2
ppy_retrom05287	0	0	0	0	0	0
ppy_retrop12140	0	0	0	0	0	0
ppy_retrop12143	0	0	0	0	0	0
ppy_retrop13949	0	0	0	0	1	0
ppy_retrom17219	0	0	2	3	10	2
ppyiretrop39643	0	1	3	1	0	3
ppyiretrom30891	0	0	0	0	0	0
ppy_retrom13003	6	4	1	4	0	1
ppyiretrom08363	0	0	0	0	1	0
ppy_retrom17217	10	4	19	10	26	0
ppy_retrom01657	0	0	0	0	1	0
ppy_retrom05062	3	4	3	2	3	5
ppy_retrom05065	4	2	2	1	2	0
ppyiretrop17912	1	3	4	0	5	7
ppyiretrop32386	0	0	0	0	0	1
ppy_retrom02728	1	1	0	0	0	0
ppy_retrom02727	0	0	0	0	0	0
ppy_retrop07990	0	1	2	5	2	7
ppy_retrom01655	0	0	0	0	0	0
ppy_retrom02723	0	0	0	0	0	0
ppyiretrop20796	0	0	0	0	0	0
ppyiretrom36739	0	0	0	0	0	0
ppyiretrom20294	1	2	0	1	0	4
ppy_retrom16292	8	0	7	10	11	22
ppy_retrom16293	1	1	2	1	0	1
ppy_retrom16999	0	0	1	0	0	0
ppy_retrop06136	3	1	2	3	3	16
ppyiretrom38971	0	2	1	0	2	7
ppy_retrom16297	4	2	10	6	7	83
ppyiretrop04052	0	0	0	0	0	0
ppy_retrom11461	0	2	1	2	0	0
ppyiretrom22572	0	0	0	5	1	0
ppyiretrom38756	0	2	0	0	0	2
ppyiretrop26633	0	0	0	0	0	1
ppy_retrop09297	0	0	0	0	0	0
ppyiretrom30082	0	0	0	0	0	2
ppy_retrom13556	3	2	3	4	22	6
ppy_retrop02725	1	0	2	2	2	1
ppy_retrom01966	0	0	0	0	0	0
ppy_retrom05289	2	0	2	12	5	10
ppy_retrom16070	0	0	0	0	0	0
ppy_retrop14529	2	0	2	0	2	89
ppy_retrom16077	0	0	0	0	0	1
ppy_retrop12787	0	0	0	0	0	0
ppyiretrom02852	1	0	0	0	0	0
ppy_retrop12821	0	0	0	0	0	0
ppy_retrom02266	7	5	1	0	0	0
ppy_retrop09052	0	0	0	0	0	0
ppyiretrop09820	0	0	0	0	0	0
ppy_retrop17330	3	3	4	5	2	29
ppy_retrop17333	0	0	1	0	0	7
ppy_retrom02269	0	0	1	0	0	0
ppy_retrom06778	0	0	0	0	0	0
ppy_retrop12789	121	15	17	34	23	140
ppy_retrom16273	0	0	2	1	4	2
ppy_retrop12548	1	2	2	1	0	0
ppy_retrop13092	0	0	0	2	0	0
ppyiretrop28415	0	0	0	0	1	0
ppyiretrom05025	0	0	0	0	2	0
ppy_retrom02463	0	0	0	0	0	1
ppyiretrop30414	1	11	0	138	279	21
ppyiretrom01036	2	0	0	1	1	1
ppy_retrop12825	0	0	0	0	0	0
ppy_retrop12545	0	0	0	0	0	0
ppy_retrop18000	2	4	5	5	5	7
ppyiretrom01033	0	0	0	0	0	0
ppy_retrop04829	3	1	1	4	2	62
ppyiretrop17820	0	0	0	0	0	0
ppy_retrom16346	0	0	0	0	0	0
ppy_retrom16188	0	1	0	0	1	0
ppy_retrop00675	0	0	0	1	0	0
ppy_retrom16186	1	0	2	1	1	194
ppy_retrop04825	42	39	42	30	59	184
ppy_retrom16183	0	0	0	0	1	3
ppy_retrom16180	0	0	0	0	0	0
ppyiretrom27790	3	3	3	1	2	29
ppy_retrom07355	0	1	0	0	0	0
ppyiretrop39394	0	0	0	0	0	0
ppy_retrop12829	0	0	0	1	0	0
ppy_retrom01819	0	0	0	0	0	0
ppy_retrop14533	0	0	1	1	0	0
ppyiretrom35061	10	5	5	4	2	12
ppy_retrom12541	12	2	21	18	11	5
ppy_retrom12897	0	0	0	0	0	0
ppy_retrom07359	0	0	0	0	0	0
ppy_retrop14530	0	0	0	0	1	0
ppy_retrop08918	0	1	0	1	0	1
ppy_retrom12195	0	0	0	0	0	0
ppy_retrop06880	34	26	95	44	48	0
ppy_retrop05111	3	1	2	5	3	24
ppy_retrop18958	0	0	0	0	0	0
ppy_retrop06884	1	1	3	0	1	2
ppy_retrop06555	1	1	1	1	1	1
ppy_retrop06889	153	94	216	303	314	2
ppy_retrop06559	1	0	0	0	0	0
ppy_retrop18951	6	2	12	17	5	3
ppy_retrop18225	0	0	0	0	1	0
ppyiretrop35717	0	0	0	0	0	0
ppy_retrom12354	4	0	2	6	0	0
ppy_retrom11869	1	1	3	5	6	12
ppy_retrop06561	0	1	2	3	1	4
ppyiretrop43289	0	0	0	0	0	4
ppy_retrom11864	0	0	14	68	96	0
ppyiretrom09167	9	5	1	1	5	284
ppy_retrop01341	0	0	0	0	0	0
ppyiretrop34625	4	4	1	6	5	9
ppyiretrop43282	0	1	1	0	1	1
ppy_retrom13733	0	0	0	1	1	0
ppy_retrom11862	0	0	0	0	0	2
ppy_retrom13731	0	0	0	0	0	0
ppyiretrom22129	0	0	0	0	0	0
ppy_retrop14433	0	0	0	0	0	0
ppy_retrop01855	1	2	0	3	1	2
ppy_retrop01853	0	0	0	0	0	0
ppyiretrom26224	12	1	0	0	0	0
ppyiretrop05020	0	0	0	0	0	2
ppy_retrom05643	5	4	6	28	68	0
ppy_retrop02232	6	1	3	1	0	5
ppy_retrom07515	0	0	0	0	0	0
ppy_retrom07386	4	0	2	0	1	16
ppy_retrop00100	0	7	0	0	0	0
ppy_retrop06316	0	0	0	0	0	0
ppyiretrom09610	2	2	1	1	0	2
ppy_retrom13913	1	1	2	0	1	23
ppy_retrop13730	0	0	0	0	0	0
ppy_retrom12994	20	7	42	69	254	3
ppy_retrom12997	0	1	1	1	3	0
ppy_retrom15889	0	0	0	0	0	8
ppy_retrom12786	0	0	1	0	0	0
ppyiretrop25781	0	1	1	0	2	1
ppy_retrom13919	0	0	0	0	0	0
ppyiretrom40209	0	0	0	0	0	0
ppy_retrom07222	0	12	7	13	42	31
ppy_retrom06608	1	0	0	0	0	0
ppy_retrop14308	0	0	3	1	1	152
ppy_retrom07228	3	0	1	11	11	0
ppy_retrop14655	0	0	1	0	0	0
ppy_retrom06467	5	2	3	10	6	0
ppy_retrop01440	3	1	0	0	0	0
ppy_retrom15884	2	1	0	2	0	8
ppy_retrom15776	0	0	0	0	0	0
ppy_retrom15300	0	0	0	4	2	0
ppy_retrop17326	2	1	2	0	1	0
ppy_retrom02049	0	0	0	0	0	0
ppy_retrop12852	4	1	0	2	3	12
ppyiretrom36158	0	0	0	0	0	0
ppy_retrop06957	0	1	0	0	0	0
ppy_retrop09275	0	1	1	0	2	0
ppy_retrom17843	0	0	0	0	0	0
ppy_retrop06953	1	0	0	2	2	3
ppy_retrop06952	0	0	0	0	0	2
ppyiretrom36153	0	0	0	0	0	0
ppy_retrom13828	0	0	0	0	0	10
ppy_retrop17325	0	0	0	2	0	8
ppy_retrom12514	0	0	0	0	0	0
ppyiretrom26537	0	0	0	0	0	0
ppy_retrom13823	4	4	1	0	0	0
ppy_retrom12311	0	0	0	0	0	3
ppyiretrop34711	0	0	0	0	1	0
ppy_retrom13826	0	0	0	0	0	0
ppyiretrop09753	0	0	0	0	0	1
ppy_retrom08995	0	0	0	0	0	1
ppy_retrom01583	0	0	2	0	0	0
ppyiretrop23744	0	0	0	0	0	0
ppyiretrom03637	0	0	0	0	0	0
ppy_retrop13961	5	4	1	0	0	1
ppy_retrom16166	1	0	0	0	0	1467
ppyiretrop42021	0	0	0	2	4	138
ppy_retrom08579	0	0	0	0	0	0
ppy_retrom13415	0	0	0	1	1	0
ppy_retrop00070	3	1	0	1	0	2
ppyiretrop16665	0	2	0	0	1	0
ppy_retrom04996	0	0	0	0	0	0
ppy_retrop01078	0	0	0	0	0	0
ppy_retrom04994	0	0	0	0	0	0
ppy_retrop13015	0	0	0	0	0	0
ppy_retrom04990	0	0	0	0	0	0
ppy_retrom02511	0	0	0	0	0	0
ppy_retrop11157	0	0	0	0	0	0
ppyiretrom34883	0	1	1	2	1	22
ppyiretrop39571	0	0	0	0	0	0
ppy_retrop17445	1	1	2	1	5	1
ppy_retrom07641	0	1	10	3	5	0
ppy_retrom17001	0	0	0	0	0	0
ppy_retrom10939	0	0	0	0	0	1
ppy_retrop14018	0	0	0	0	0	0
ppy_retrop08012	2	1	1	1	1	3
ppy_retrop08015	7	1	6	8	6	10
ppy_retrom15174	0	0	0	0	0	0
ppy_retrop08017	0	0	0	0	0	5
ppy_retrop10200	0	0	0	0	0	0
ppy_retrop10201	0	0	0	0	0	0
ppyiretrop03330	0	0	0	0	0	0
ppyiretrom17777	0	0	0	0	0	3
ppy_retrom12771	2	0	2	1	1	9
ppy_retrom10934	1	1	0	0	0	0
ppy_retrop14017	80	16	3	0	3	98
ppyiretrop18937	1	2	1	3	1	56
ppyiretrop12489	8	3	6	5	8	0
ppyiretrom23002	1	2	1	0	0	0
ppy_retrom15372	0	0	0	0	0	0
ppyiretrop37806	0	0	0	0	0	0
ppyiretrop11872	0	0	0	0	0	0
ppy_retrom12175	0	0	1	0	1	1
ppyiretrop38364	4	0	9	5	6	5
ppyiretrop11877	2	0	2	5	3	12
ppyiretrop24148	0	0	0	1	1	4
ppy_retrom02003	0	0	0	0	0	0
ppy_retrom11180	2	0	0	0	0	0
ppyiretrom27901	0	0	0	0	0	0
ppyiretrop30159	0	0	0	0	0	0
ppyiretrop03410	0	0	0	2	1	2
ppy_retrop10844	159	42	153	254	133	569
ppyiretrop17626	1	0	0	3	1	11
ppy_retrop10842	1	2	2	3	2	0
ppy_retrop10840	2	0	0	1	0	0
ppy_retrop10841	0	1	0	1	0	3
ppy_retrop18786	0	0	0	0	0	1
ppyiretrop04384	0	0	0	1	0	4
ppy_retrop18783	0	0	0	0	0	0
ppy_retrom09484	2	0	0	4	0	13
ppy_retrom10856	3	0	1	2	4	0
ppy_retrop09607	1	6	5	4	4	31
ppyiretrom11437	0	0	0	0	0	0
ppy_retrom10852	0	0	0	0	0	0
ppy_retrom10853	0	1	0	0	0	0
ppy_retrom11176	0	0	0	0	0	0
ppy_retrom11675	0	0	0	0	0	32
ppyiretrom41556	1	0	3	0	2	2
ppy_retrom11677	22	9	7	24	12	19
ppyiretrop02448	25	27	19	39	10	0
ppyiretrom20684	1	1	0	0	0	0
ppyiretrop33836	0	0	1	0	0	1
ppy_retrom11678	0	0	0	0	0	0
ppyiretrom33928	0	0	0	2	0	0
ppyiretrom31119	1	0	0	1	1	0
ppy_retrom15513	0	1	1	1	0	1
ppy_retrop07851	0	0	0	0	0	0
ppyiretrom20441	1	0	0	1	2	0
ppyiretrop35280	0	0	0	0	0	0
ppy_retrom15518	0	0	0	0	1	0
ppy_retrop11044	0	0	1	1	1	1
ppyiretrom01648	0	0	0	0	0	0
ppy_retrom11078	5	3	1	4	1	5
ppy_retrom15995	0	0	0	0	0	0
ppyiretrom00170	8	2	0	0	2	70
ppy_retrop16472	0	0	0	0	0	0
ppy_retrop11314	396	255	325	399	425	443
ppy_retrop10154	6	20	16	10	4	110
ppy_retrop07630	0	0	0	0	0	0
ppy_retrom11690	0	0	0	4	0	0
ppy_retrom11541	0	0	0	0	0	2
ppy_retrom18592	0	0	0	0	0	0
ppy_retrom05801	1	0	0	0	3	1
ppy_retrom18590	49	20	104	144	80	2
ppy_retrom18596	1	0	0	1	5	2
ppyiretrop37367	25	18	48	37	45	0
ppy_retrop13739	0	0	0	0	0	0
ppy_retrom10583	20	9	11	11	5	35
ppy_retrom10586	0	0	0	0	0	0
ppy_retrom10587	1	1	0	0	0	1
ppy_retrop18493	1	0	0	0	0	1
ppy_retrop07056	0	0	0	0	0	0
ppy_retrop05238	0	0	0	0	0	20
ppy_retrop18497	0	0	0	0	0	0
ppy_retrom10610	1	1	0	34	14	1
ppy_retrop10956	2	0	3	4	1	3
ppy_retrop01705	0	0	0	0	0	3
ppy_retrom01567	0	0	0	0	0	0
ppy_retrop14651	0	0	0	0	0	0
ppy_retrom10615	0	0	0	0	0	2
ppy_retrop13839	0	0	0	0	1	0
ppy_retrop17929	1	0	0	3	1	36
ppy_retrop10539	0	0	0	0	0	3
ppy_retrom15204	7	5	0	17	8	6
ppy_retrop13997	0	0	0	0	0	0
ppyiretrom40156	1	0	2	1	2	0
ppy_retrop07052	0	0	1	1	0	2
ppy_retrop11009	1	1	0	0	0	0
ppy_retrom15201	2	0	2	0	1	5
ppy_retrop12201	2	0	0	0	0	0
ppyiretrop27449	0	0	0	0	0	0
ppy_retrom10039	0	0	0	0	0	0
ppyiretrop19885	10	0	0	4	2	0
ppy_retrop16270	12	25	16	152	131	7761
ppy_retrom14005	0	0	0	2	0	0
ppyiretrom28009	1	0	0	0	0	0
ppy_retrom01571	0	0	0	0	0	0
ppy_retrom18622	27	11	51	31	26	2
ppy_retrom09029	0	0	0	0	0	0
ppy_retrom02916	9	9	10	14	5	1
ppyiretrom09123	0	1	0	4	5	24
ppy_retrom02910	0	0	0	0	0	0
ppy_retrop13872	0	0	0	0	0	0
ppyiretrop23813	0	0	0	0	0	0
ppy_retrom14648	0	0	0	0	0	1
ppy_retrom06339	0	0	2	0	2	2
ppyiretrop41123	0	4	2	2	3	36
ppy_retrop13280	0	0	0	0	0	0
ppyiretrop36660	0	0	1	0	0	0
ppy_retrop18567	5	4	2	7	0	2
ppy_retrop12973	2	1	0	0	1	1
ppyiretrom41171	0	0	0	0	0	33
ppy_retrop13837	0	2	1	0	3	0
ppy_retrom17731	0	0	0	0	0	0
ppyiretrop15993	1	1	0	0	0	5
ppy_retrop12917	0	0	0	0	0	0
ppy_retrom14134	0	4	4	8	10	0
ppy_retrom16642	2	2	4	2	0	7
ppy_retrop05545	57	6	4	13	2	33
ppyiretrom08427	1	4	0	4	4	11
ppyiretrop28645	39	1	0	30	5	391
ppy_retrop12858	0	0	0	1	0	0
ppyiretrom14202	0	0	0	0	0	0
ppyiretrom14205	0	0	1	0	0	0
ppyiretrop36805	0	2	0	0	0	0
ppy_retrop14384	0	0	0	0	0	0
ppy_retrom17112	0	0	0	0	0	0
ppy_retrop17467	8	1	10	65	39	2
ppyiretrom21333	2	1	0	0	0	2
ppyiretrom39584	0	0	0	0	0	0
ppyiretrom33508	0	0	0	0	0	0
ppy_retrom17115	0	0	0	0	0	0
ppy_retrop17782	0	0	0	0	0	10
ppy_retrop01216	0	0	0	0	0	0
ppy_retrop17784	0	0	0	0	0	1
ppy_retrop16302	2	0	1	2	0	0
ppyiretrom24568	1	0	0	0	0	1
ppy_retrom11391	0	0	0	0	0	0
ppy_retrom18133	0	0	0	1	0	0
ppy_retrop16652	0	0	0	0	5	1
ppy_retrom18136	0	5	1	1	1	0
ppy_retrop07143	0	0	0	0	0	0
ppy_retrop07142	0	2	13	5	8	0
ppy_retrom11544	0	0	0	0	0	0
ppyiretrom42229	0	0	0	0	0	0
ppyiretrom00194	0	0	0	0	0	0
ppyiretrop37621	0	1	0	1	0	0
ppy_retrop13866	0	0	0	0	0	0
ppy_retrop14571	0	0	0	0	0	0
ppyiretrop00765	0	0	0	0	0	0
ppy_retrop09200	0	0	2	0	0	0
ppyiretrom14336	2	0	2	3	1	15
ppy_retrop17656	0	0	0	0	0	0
ppyiretrop17083	0	0	0	0	0	2
ppy_retrom17846	0	0	0	0	0	0
ppyiretrop39961	0	0	0	43	0	3
ppy_retrom17026	0	0	0	0	0	0
ppy_retrop17981	1	0	16	5	3	5
ppy_retrom17022	31	23	40	67	78	256
ppy_retrop16785	0	0	3	1	0	1
ppy_retrop16784	0	0	0	0	1	4
ppy_retrop06895	0	1	0	0	0	1
ppyiretrop41945	0	0	0	0	0	0
ppy_retrom13874	6	2	5	12	7	17
ppy_retrop12150	1	0	0	23	2	0
ppyiretrom14440	0	1	1	3	0	5
ppy_retrop12157	1	0	0	0	0	0
ppyiretrom22219	3	0	0	0	0	2
ppyiretrom14112	0	1	0	1	1	5
ppy_retrom17207	0	0	0	0	0	0
ppyiretrop28841	0	0	0	0	0	0
ppy_retrom17205	0	0	0	0	0	0
ppyiretrop04426	7	0	0	0	0	0
ppy_retrom05078	0	0	0	0	1	2
ppyiretrom04328	0	0	0	0	0	0
ppy_retrom05076	0	0	1	0	1	0
ppy_retrom14953	7	9	17	17	9	26
ppyiretrop30714	0	0	0	0	0	0
ppy_retrom07024	1	0	0	1	0	2
ppy_retrom05072	4	2	0	7	6	44
ppy_retrom05071	0	0	3	1	1	4
ppyiretrop38763	128	109	132	201	193	0
ppy_retrop02399	1	0	0	0	0	0
ppy_retrom01005	5	7	0	2	0	1
ppy_retrop09847	0	0	0	0	0	0
ppy_retrop02531	0	0	0	0	0	0
ppy_retrom11048	1	0	0	1	0	0
ppyiretrop17902	0	0	0	0	0	0
ppy_retrop02532	0	0	0	0	0	0
ppy_retrop14036	0	0	0	0	0	0
ppyiretrom34410	0	0	0	0	0	0
ppy_retrom02737	3	4	1	2	2	42
ppyiretrom38747	249	85	146	544	253	1078
ppy_retrop14544	0	0	0	0	0	0
ppyiretrom33291	0	0	0	0	0	0
ppy_retrop16437	49	64	40	73	59	95
ppyiretrom35944	0	0	0	0	0	0
ppy_retrop13840	0	0	0	0	0	0
ppy_retrop19215	0	0	1	0	0	1
ppyiretrom35948	0	0	0	0	0	0
ppy_retrom15134	2	0	0	4	1	0
ppyiretrop01589	0	0	0	0	0	0
ppyiretrop07516	0	2	2	1	0	2
ppyiretrom18341	0	0	0	0	0	2
ppy_retrom11989	1485	535	1898	3071	3297	3381
ppy_retrop09281	1	0	0	1	0	0
ppy_retrop14536	2	1	3	2	8	24
ppy_retrom16446	0	0	0	0	0	4
ppyiretrom02594	0	0	0	0	0	0
ppy_retrop18816	0	0	0	0	0	0
ppy_retrop13843	1	0	0	0	0	0
ppy_retrop17603	5	22	10	20	14	15
ppy_retrom16088	0	0	0	0	0	0
ppy_retrom06293	2	1	4	5	4	13
ppy_retrom02955	8	10	3	7	11	3
ppyiretrop14586	0	0	0	0	0	3
ppyiretrom22590	2	1	1	9	10	76
ppy_retrom06744	0	0	0	0	0	4
ppyiretrop11063	1	0	0	0	0	0
ppy_retrop09043	0	0	0	0	0	0
ppyiretrop28424	0	0	0	0	0	1
ppy_retrom12516	2	0	0	0	0	0
ppy_retrop09049	0	0	0	1	0	1
ppy_retrom16442	0	1	0	2	0	0
ppy_retrop12556	18	7	207	185	193	2
ppy_retrop12557	0	0	0	0	0	3
ppy_retrop12554	0	0	0	0	0	0
ppy_retrop13104	3	5	5	8	6	1
ppy_retrop11657	0	0	1	0	1	1
ppy_retrom02456	0	0	0	0	0	0
ppy_retrom13109	3	0	2	0	2	0
ppyiretrom21933	2	2	0	2	0	4
ppy_retrop11517	0	0	0	0	0	0
ppy_retrop12559	0	0	1	0	0	0
ppy_retrom16991	0	0	0	0	0	6
ppy_retrop04834	47	49	10	14	5	40
ppy_retrom16353	0	0	0	1	0	0
ppy_retrom06341	5	1	1	1	3	17
ppy_retrop02404	0	0	1	1	2	0
ppy_retrom06343	0	0	0	0	0	0
ppy_retrop04831	4	5	0	3	3	6
ppy_retrop03133	0	0	0	0	0	36
ppyiretrom34296	0	1	1	0	0	3
ppy_retrop03136	6	6	2	1	0	1
ppy_retrom16640	0	1	1	2	1	5
ppy_retrom16643	0	1	0	0	0	0
ppy_retrop03135	29	9	10	21	5	8
ppy_retrom13699	0	0	0	3	6	0
ppy_retrom01828	0	0	0	0	0	2
ppy_retrom07436	3	5	1	8	4	2
ppy_retrom15031	12	6	5	3	7	1
ppy_retrom07432	0	0	0	0	0	0
ppyiretrom35720	2	0	0	0	1	2
ppy_retrom13686	0	0	1	0	0	0
ppy_retrop02662	0	0	0	0	0	0
ppy_retrom07285	0	0	0	1	2	13
ppy_retrom07439	0	0	0	0	0	0
ppy_retrop06890	21	11	0	4	0	11
ppy_retrom12182	7	4	5	2	4	18
ppy_retrop05166	0	0	0	1	0	16
ppy_retrop16860	6	15	5	6	5	201
ppy_retrom12347	2	12	4	8	3	6
ppy_retrop16866	0	0	0	0	1	0
ppy_retrop05161	0	0	0	0	0	0
ppyiretrop07357	0	0	0	0	0	0
ppy_retrop18963	0	0	0	1	0	0
ppyiretrom26265	5	0	0	0	3	0
ppy_retrom12499	0	0	0	0	0	0
ppyiretrop27820	0	0	1	0	1	11
ppy_retrom12613	0	0	0	0	0	1
ppy_retrom13749	0	0	0	0	0	0
ppy_retrom08832	0	0	0	0	0	0
ppy_retrom12341	21	4	2	13	4	63
ppyiretrop05642	2	1	0	2	0	5
ppyiretrop34652	0	0	0	0	0	0
ppy_retrom13740	0	0	0	0	0	0
ppy_retrom13747	0	9	0	1	6	3
ppy_retrom13210	1	0	3	12	3	0
ppyiretrom37388	0	0	0	0	0	0
ppy_retrom15155	0	0	0	0	0	0
ppyiretrom35618	0	0	0	0	0	0
ppy_retrom05652	0	0	1	0	0	0
ppy_retrop13639	0	0	1	1	1	0
ppy_retrom01954	11	3	3	13	9	107
ppy_retrop05561	46	81	16	35	18	173
ppyiretrom10178	38	6	0	8	1	13
ppy_retrop01848	0	0	0	0	0	30
ppy_retrop02245	0	0	0	0	0	0
ppy_retrom13582	0	0	0	0	0	0
ppy_retrom08761	16	1	5	1	11	8
ppy_retrop01449	0	0	0	0	0	3
ppyiretrop13119	0	2	2	3	5	0
ppy_retrop17272	1	3	0	2	6	1
ppy_retrom00518	0	0	0	0	0	9
ppy_retrom00519	0	0	0	0	0	0
ppy_retrom00516	19	1	0	2	0	11
ppyiretrop24958	0	2	1	1	0	7
ppy_retrom07234	4	3	0	2	2	3
ppyiretrop42387	0	0	0	0	0	0
ppyiretrom26868	0	0	3	0	1	2
ppy_retrom00513	0	0	0	0	0	0
ppy_retrop13883	0	0	0	1	0	0
ppy_retrom07231	0	3	0	0	0	0
ppy_retrom06638	0	0	0	1	0	0
ppy_retrom15747	1	5	1	2	0	22
ppy_retrop09469	0	0	0	0	0	1
ppy_retrop01753	0	0	0	0	0	0
ppyiretrom35434	1	0	2	3	8	5
ppy_retrop14313	0	0	0	1	1	3
ppy_retrom13212	0	0	1	0	0	0
ppyiretrom40239	0	0	0	0	0	0
ppy_retrop09467	0	0	0	0	0	0
ppy_retrop14314	0	0	0	1	1	0
ppy_retrop09465	3	3	1	1	1	0
ppyiretrop24555	0	1	0	0	0	0
ppy_retrop12939	0	0	0	0	0	0
ppyiretrom03883	0	0	0	0	0	0
ppy_retrop08223	0	0	0	0	0	0
ppy_retrop18366	156	22	105	69	80	672
ppyiretrop35678	1	4	3	1	3	0
ppy_retrop18364	1	1	1	3	2	11
ppy_retrom11114	9	4	0	5	0	0
ppyiretrop03521	5	0	9	0	0	2
ppy_retrop09267	1	3	1	4	3	17
ppy_retrop09260	0	0	0	0	0	13
ppy_retrop06941	1	1	0	0	0	12
ppy_retrop09263	0	0	0	2	0	0
ppyiretrop34300	0	0	0	0	0	0
ppy_retrop12775	1	1	0	1	0	0
ppy_retrop16671	2	2	0	1	0	2
ppy_retrom08961	3	1	2	5	1	13
ppy_retrom13392	0	0	0	0	0	0
ppyiretrop34273	2	3	2	0	2	5
ppy_retrom08618	3961	1137	2382	5471	5599	5195
ppy_retrom13367	4	1	0	3	2	1
ppy_retrom08968	0	0	0	0	0	0
ppy_retrom13870	1	1	0	0	0	0
ppy_retrop13435	1	1	4	8	4	72
ppy_retrop13399	0	0	0	0	0	0
ppyiretrom06740	0	0	0	0	1	0
ppy_retrop02743	0	1	0	3	3	6
ppyiretrop11763	1	0	0	0	0	0
ppyiretrop23872	0	0	1	4	0	0
ppyiretrom16507	141	25	81	260	255	4
ppy_retrom07654	1	0	0	1	0	5
ppy_retrop18021	0	0	0	1	0	0
ppyiretrom24828	22	14	12	22	14	259
ppyiretrom34898	4	0	0	2	4	14
ppy_retrop01069	1	2	5	0	0	0
ppy_retrom10926	0	1	1	0	1	0
ppy_retrom10924	0	0	0	0	0	0
ppy_retrom15093	0	0	0	1	0	2
ppyiretrop41436	0	0	1	0	0	0
ppy_retrop10233	0	1	0	0	1	0
ppyiretrop39364	0	0	1	0	1	10
ppy_retrop05386	0	0	0	0	0	0
ppyiretrom23014	1724	593	549	800	771	1292
ppy_retrom09964	1	0	0	1	0	0
ppy_retrom12767	0	0	0	0	0	0
ppy_retrom15341	2	1	2	0	2	9
ppyiretrop15561	0	0	0	7	6	3
ppy_retrom15691	0	0	0	0	0	0
ppy_retrom02140	0	0	0	0	1	3
ppyiretrop03633	3	0	3	63	3	40
ppy_retrom13583	6	5	3	6	10	18
ppy_retrop07208	1	0	0	0	0	0
ppyiretrom36770	1	0	0	0	7	0
ppy_retrom15349	1	1	2	0	2	15
ppy_retrom12165	0	1	0	0	1	2
ppy_retrom02149	0	0	0	0	0	0
ppy_retrom02148	0	0	0	0	0	34
ppy_retrop04494	0	0	0	0	0	2
ppyiretrop42633	0	0	2	9	4	5
ppy_retrom11191	0	0	0	1	0	0
ppy_retrop10789	0	0	0	0	0	0
ppy_retrop03208	274	78	299	499	471	585
ppy_retrop14231	0	0	2	2	3	51
ppy_retrop16834	0	0	0	0	0	0
ppy_retrop10785	0	0	0	0	0	2
ppyiretrop27274	0	0	0	0	0	0
ppy_retrop10787	0	0	0	0	0	1
ppy_retrop10781	0	0	0	0	0	0
ppy_retrom13961	0	0	0	0	0	0
ppy_retrop10782	3	2	0	0	2	0
ppy_retrom06918	8	9	5	0	0	43
ppy_retrop09679	0	0	0	0	0	0
ppyiretrop02045	0	0	0	0	1	0
ppyiretrom16438	1	0	1	2	0	0
ppyiretrop39457	0	0	0	1	1	8
ppy_retrom06910	771	152	333	595	612	598
ppy_retrom09499	0	4	1	0	0	0
ppyiretrom16340	3	8	19	10	4	42
ppy_retrop18799	0	0	0	0	0	0
ppy_retrom06916	6	10	0	0	0	5
ppy_retrom13469	0	0	0	1	1	1
ppy_retrop01660	0	1	1	3	4	4
ppy_retrom16432	1	0	2	1	1	7
ppy_retrom16203	5	8	41	12	7	1
ppy_retrom11661	0	0	0	0	0	0
ppy_retrom12362	0	0	0	0	0	0
ppy_retrom07238	3	1	0	1	2	0
ppy_retrop18152	6	0	1	3	0	33
ppyiretrop01490	0	0	0	0	1	8
ppy_retrom15524	2	2	1	1	1	0
ppyiretrom40016	0	0	0	0	0	10
ppy_retrom16430	0	0	2	1	2	11
ppy_retrop13770	0	0	0	0	0	0
ppy_retrop10301	0	0	0	0	0	2
ppy_retrom08769	2	0	0	6	1	5
ppy_retrom00832	1	1	1	2	0	45
ppy_retrop07847	0	0	0	0	0	0
ppy_retrom08819	0	0	0	0	0	5
ppy_retrom09365	0	0	0	2	0	2
ppyiretrop03988	0	0	0	2	0	14
ppyiretrop38275	0	0	0	0	0	0
ppy_retrop00396	1	0	0	0	0	2
ppy_retrop02152	0	0	0	0	0	3
ppyiretrom36678	1	2	2	2	1	10
ppy_retrom02854	0	0	0	0	0	4
ppy_retrom02856	3	6	0	4	7	301
ppy_retrom02850	0	1	0	1	1	16
ppy_retrom02853	0	0	0	0	0	3
ppy_retrom09143	0	0	0	0	0	0
ppyiretrom20653	0	0	2	0	2	13
ppyiretrom12767	8	4	0	1	1	30
ppy_retrop07626	0	1	1	2	1	1
ppyiretrop02558	128	62	103	114	52	23
ppyiretrom01426	0	0	0	16	1	0
ppy_retrop19175	0	0	0	0	0	4
ppy_retrom18581	4	4	2	5	5	4
ppy_retrom18582	3	2	1	4	3	7
ppy_retrop11446	0	0	0	0	0	0
ppy_retrop19170	7	1	3	3	4	8
ppy_retrop19173	48	10	5	19	24	7
ppy_retrop18489	3	2	2	9	16	18
ppyiretrop41048	0	0	0	0	0	2
ppy_retrop04167	2	1	0	0	0	0
ppy_retrop10495	2	0	0	1	0	4
ppy_retrop10949	0	1	0	0	0	0
ppy_retrom01398	0	0	0	0	1	0
ppy_retrom11537	0	0	1	0	1	0
ppy_retrop00622	0	0	0	0	0	0
ppy_retrop00621	0	0	0	0	0	0
ppyiretrom36146	0	0	0	0	0	0
ppyiretrom16232	0	0	0	0	0	7
ppy_retrom10620	0	0	0	0	0	2
ppy_retrom17903	1	0	0	0	0	0
ppyiretrop23634	246	127	127	137	156	408
ppyiretrom31424	0	0	1	23	6	1
ppy_retrom10351	0	0	0	0	0	0
ppyiretrom20781	0	0	0	0	0	0
ppy_retrom01534	0	0	0	0	0	1
ppyiretrop22521	0	0	0	0	1	0
ppy_retrom16929	0	0	0	0	0	0
ppy_retrom15239	0	0	0	0	0	0
ppy_retrop11545	0	0	0	2	1	0
ppy_retrop11546	73	8	32	50	72	0
ppy_retrom15746	0	1	0	0	0	2
ppy_retrop05351	25	24	7	1	0	34
ppy_retrop11626	9	4	0	0	0	0
ppy_retrop11014	1	0	3	0	0	0
ppy_retrom10893	2	0	0	2	3	1
ppy_retrop16178	0	0	0	0	0	0
ppy_retrop10542	1	0	0	1	0	0
ppy_retrop11019	1	2	1	2	3	2
ppy_retrop11548	0	0	0	0	0	0
ppy_retrop11564	10	0	1	0	0	3
ppy_retrop17917	2	1	0	0	0	4
ppy_retrop10544	0	0	0	0	0	0
ppy_retrop12893	0	0	0	0	0	0
ppyiretrom04847	0	0	0	0	1	17
ppyiretrop32667	0	0	0	2	23	4
ppy_retrom17699	0	0	0	0	0	0
ppyiretrom01831	0	0	0	0	0	0
ppyiretrom04840	0	0	1	0	0	0
ppy_retrom11531	0	0	7	7	1	2
ppy_retrop01810	1	0	0	0	0	0
ppy_retrom17697	0	0	0	0	0	0
ppyiretrop38953	57	25	31	34	19	0
ppy_retrop16264	0	0	0	0	0	0
ppy_retrom17690	0	0	0	0	0	1
ppy_retrom17693	0	0	0	3	3	5
ppyiretrop19893	0	0	0	0	0	0
ppy_retrom02921	0	0	0	0	0	0
ppy_retrom07884	1	1	0	0	0	2
ppy_retrop13432	0	0	0	0	0	0
ppy_retrop15200	0	0	0	0	0	0
ppy_retrom09032	0	0	0	0	0	0
ppy_retrop15204	2	0	0	0	0	1
ppyiretrom25881	1	1	0	0	1	3
ppyiretrom04069	0	0	0	0	0	0
ppy_retrop17392	0	0	1	1	1	0
ppy_retrop17973	0	0	0	0	0	0
ppy_retrop18578	4	8	10	22	7	3
ppy_retrom10482	0	0	0	0	0	0
ppy_retrom00162	0	0	0	0	0	0
ppy_retrom00161	0	0	0	0	0	0
ppyiretrom19400	0	0	0	2	0	0
ppy_retrom06635	0	0	0	0	0	0
ppyiretrom41160	1	3	2	8	7	2
ppyiretrom19403	0	0	0	0	0	0
ppy_retrop12949	0	0	0	0	0	0
ppy_retrom15663	0	0	0	0	0	0
ppyiretrom39774	5	3	8	14	36	10
ppyiretrom26746	1	0	0	0	0	0
ppyiretrop01954	0	0	3	1	1	0
ppy_retrom14037	8	1	20	11	5	16
ppy_retrom06636	1	0	1	0	0	27
ppy_retrom14127	0	2	1	7	11	0
ppy_retrom11332	1	0	0	1	1	9
ppy_retrom12380	0	0	0	0	0	0
ppy_retrop13075	1	0	2	0	1	0
ppyiretrop19090	0	1	0	0	0	2
ppyiretrop02878	0	0	0	0	10	0
ppy_retrop16082	0	0	0	0	0	0
ppy_retrom12237	1	0	3	0	2	0
ppy_retrom10310	59	32	12	44	21	119
ppyiretrop29894	11	10	5	11	7	0
ppyiretrom33519	0	0	0	0	0	0
ppyiretrop29446	60	16	106	159	73	182
ppy_retrom10314	1	0	4	7	8	0
ppyiretrop05853	17	19	3	9	107	11
ppy_retrop13073	0	0	0	0	0	2
ppy_retrop16646	0	0	0	2	2	11
ppy_retrom18124	0	0	0	0	0	0
ppy_retrop16642	0	0	1	1	0	0
ppy_retrop15848	0	1	1	1	0	3
ppy_retrom18120	0	0	0	1	1	0
ppyiretrom24576	0	0	0	0	0	0
ppy_retrom01163	0	0	0	0	0	0
ppyiretrop22445	2	2	0	0	1	2
ppy_retrom15259	9	22	11	20	28	38
ppyiretrop15962	3	2	1	2	2	6
ppy_retrom12460	2	0	0	0	0	0
ppyiretrom04192	0	0	0	0	0	0
ppyiretrop11400	3	8	3	3	1	3
ppyiretrom28415	2	0	0	1	0	0
ppy_retrom17874	0	1	4	14	27	35
ppyiretrop34875	9	5	8	0	7	0
ppyiretrom08628	7	3	2	8	1	3
ppy_retrom17870	0	1	1	1	3	5
ppy_retrom17058	0	0	0	0	0	0
ppy_retrom14166	0	1	0	0	0	0
ppyiretrom14325	0	0	1	0	0	0
ppy_retrop16790	0	2	1	5	0	0
ppy_retrom10556	23	11	22	17	6	2
ppy_retrom10555	1	0	1	0	2	1
ppy_retrom10006	0	0	0	0	1	0
ppy_retrom10552	0	0	4	0	0	5
ppy_retrop11164	0	0	0	0	0	2
ppy_retrom10550	0	0	0	0	2	0
ppy_retrop06156	2	0	1	1	2	65
ppyiretrom13672	0	0	0	0	0	8
ppyiretrom19758	0	0	0	0	0	0
ppyiretrom22202	0	0	2	0	1	2
ppyiretrom14451	5	0	1	257	57	158
ppy_retrop16129	0	0	0	0	0	2
ppy_retrop18241	0	0	1	1	1	47
ppyiretrom42522	1	0	0	0	2	0
ppy_retrop07171	1	1	0	0	1	0
ppyiretrop34988	0	1	0	0	1	0
ppy_retrop12412	20	15	1	2	43	2
ppy_retrop17131	0	0	0	1	0	0
ppy_retrop06189	0	2	1	2	2	0
ppy_retrop11966	27	19	10	25	24	24
ppy_retrop17683	0	0	2	0	0	11
ppyiretrom10344	15	11	19	14	15	15
ppy_retrom13158	3	2	0	0	0	11
ppy_retrop17139	6	8	4	1	1	43
ppy_retrop17138	1	0	0	2	1	4
ppy_retrom06795	0	0	0	0	0	0
ppy_retrom02409	0	0	0	0	0	0
ppy_retrom01011	0	0	0	0	0	0
ppyiretrop09587	0	0	0	0	0	0
ppy_retrom02700	8	7	15	48	108	25
ppy_retrop02529	0	0	0	0	0	1
ppy_retrop16695	0	0	0	0	0	0
ppy_retrop17990	0	0	0	0	0	0
ppy_retrop19228	0	0	0	1	0	8
ppyiretrop20933	167	65	63	145	29	61
ppyiretrop08678	0	0	0	0	0	0
ppy_retrom01223	0	0	0	0	0	0
ppyiretrom12725	0	0	0	0	0	0
ppy_retrop12091	0	0	0	0	0	0
ppy_retrom16472	0	0	0	0	0	0
ppyiretrom14213	0	0	0	0	0	0
ppy_retrop12095	0	0	1	1	0	10
ppy_retrom16471	1	0	0	0	6	0
ppy_retrom16096	0	0	1	18	1	7
ppy_retrop15226	10	3	6	19	17	0
ppy_retrop13050	0	0	0	0	1	0
ppy_retrop13322	0	1	2	0	0	12
ppyiretrop27030	0	2	0	0	0	3
ppy_retrop18800	1	0	1	3	25	4
ppyiretrop34377	4	1	0	1	1	4
ppy_retrom06752	7	10	8	12	26	6
ppy_retrom11995	10	7	6	16	9	16
ppy_retrop18804	2	0	0	1	0	4
ppy_retrom14174	0	0	0	1	5	0
ppy_retrom16256	1	1	1	1	3	7
ppyiretrom32392	0	0	0	0	0	0
ppy_retrop17351	0	0	0	0	0	0
ppyiretrop42956	0	4	2	0	0	2
ppyiretrop14597	1	0	0	2	0	13
ppy_retrop09077	0	1	0	0	0	0
ppy_retrom17308	3	1	0	0	1	1
ppy_retrom13116	0	1	0	0	0	0
ppyiretrom32648	0	1	1	0	4	0
ppyiretrop22518	0	0	0	0	0	0
ppy_retrom13112	0	0	0	0	0	0
ppy_retrom13363	17	40	38	8	5	32
ppy_retrop17211	2	1	0	1	2	21
ppy_retrop12521	4	0	0	5	1	7
ppy_retrop12520	29	13	72	42	36	4
ppy_retrop12527	0	0	0	0	0	0
ppy_retrop12525	4	0	3	0	0	6
ppy_retrop07771	0	0	0	0	0	0
ppy_retrop12529	0	0	0	0	0	0
ppyiretrom05684	12	2	6	6	2	2
ppy_retrom15952	4	2	0	0	0	26
ppy_retrom12918	75	22	84	35	16	0
ppyiretrop13817	0	0	0	0	0	0
ppy_retrom15717	0	0	0	0	0	1
ppy_retrom13418	0	0	0	0	0	2
ppyiretrom09637	0	0	0	0	0	0
ppy_retrop01447	0	0	0	0	0	0
ppy_retrop19059	73	61	138	77	100	129
ppy_retrop14563	0	0	0	0	0	0
ppy_retrom02820	0	0	0	0	0	4
ppy_retrop02676	0	0	0	0	0	0
ppy_retrom12405	37	57	25	52	59	8
ppy_retrom07405	6	0	1	1	1	5
ppy_retrom13683	1	0	0	1	1	2
ppy_retrop02670	0	0	0	3	1	0
ppy_retrop05378	2	0	3	2	1	38
ppy_retrop02387	0	0	0	0	0	0
ppy_retrop18974	5	2	1	1	1	6
ppy_retrop14499	0	0	0	0	0	0
ppy_retrom11407	0	0	0	0	0	0
ppyiretrop27815	5	2	2	0	3	2
ppy_retrop14494	0	0	0	0	0	0
ppy_retrop06372	0	0	0	0	0	0
ppy_retrop13218	0	0	0	1	0	19
ppy_retrop17454	287	49	79	140	126	5
ppyiretrom02479	3	0	4	7	14	28
ppy_retrom13759	0	0	0	0	0	0
ppyiretrop42823	3	0	4	6	13	11
ppy_retrom12372	12	11	33	36	53	44
ppy_retrom12377	1	0	7	2	1	13
ppy_retrom00264	28	22	269	97	102	5
ppy_retrom13200	0	0	0	0	0	0
ppy_retrop12634	804	122	670	1176	700	146
ppyiretrom37398	0	2	1	1	8	1
ppy_retrop12632	1	2	0	2	5	16
ppy_retrom15815	0	0	0	0	0	0
ppy_retrop01871	1	0	2	0	2	1
ppyiretrop35197	1	0	2	1	3	1
ppy_retrom16286	1	0	3	0	0	0
ppyiretrom36939	40	25	111	88	181	18
ppy_retrop02250	2	0	0	0	5	0
ppy_retrom01943	0	0	0	0	0	1
ppy_retrop02701	2	0	1	5	1	0
ppy_retrop02706	1	0	0	0	0	1
ppy_retrop02704	4	0	0	5	1	2
ppy_retrop13930	212	154	0	0	0	0
ppyiretrom31124	2	2	1	0	0	16
ppy_retrom12484	0	0	0	0	0	1
ppy_retrom07719	0	0	0	0	0	0
ppy_retrom12971	0	0	3	0	0	2
ppyiretrop11792	0	0	0	0	0	3
ppy_retrom13978	0	0	0	0	0	0
ppy_retrom07714	0	0	0	0	0	0
ppy_retrom07717	0	0	0	0	0	0
ppy_retrom07240	1	0	0	0	0	1
ppy_retrom07246	0	1	3	3	3	0
ppy_retrop04628	0	0	0	0	0	0
ppy_retrom12089	0	0	0	0	0	3
ppyiretrom16752	35	11	24	42	41	19
ppyiretrom14913	4	1	2	3	0	1
ppyiretrom27053	0	0	0	0	0	0
ppy_retrom12083	23	19	68	42	35	1
ppy_retrop05800	0	0	0	0	0	0
ppy_retrom12080	0	0	0	0	0	0
ppy_retrom12085	0	0	0	4	10	18
ppy_retrop18370	0	0	0	0	0	0
ppy_retrom07153	0	0	0	4	6	11
ppy_retrop18372	5	3	0	0	0	12
ppy_retrop18373	0	0	0	0	0	0
ppy_retrop08384	0	0	1	76	42	3
ppy_retrop18377	3	2	0	1	3	1
ppyiretrop25325	0	0	0	0	0	2
ppyiretrop14773	1	0	0	0	0	0
ppyiretrop24548	2	0	6	0	0	0
ppy_retrom12570	0	0	0	0	0	0
ppyiretrom26459	0	0	0	0	0	0
ppyiretrom26329	0	0	1	0	0	0
ppy_retrop09256	0	0	0	0	0	29
ppy_retrom13376	0	0	0	0	0	0
ppy_retrom08975	0	0	0	0	0	0
ppyiretrop15081	0	1	1	0	0	2
ppy_retrom08971	28	9	4	13	27	0
ppy_retrom16321	2	0	0	5	3	5
ppyiretrop14570	0	0	0	1	0	0
ppy_retrop11252	2	0	0	0	0	0
ppy_retrop16692	0	0	1	0	0	0
ppy_retrop05138	0	0	0	0	0	0
ppyiretrop42040	1	0	0	0	0	0
ppy_retrop13717	0	0	0	0	0	0
ppyiretrom34891	0	0	1	0	0	7
ppyiretrop16688	0	0	3	0	0	4
ppy_retrop02223	0	0	0	0	0	0
ppy_retrom07669	0	0	0	0	0	0
ppy_retrop18014	1	0	0	0	0	1
ppyiretrop40955	3	0	0	0	0	0
ppy_retrop02222	0	0	0	0	0	0
ppy_retrop04537	0	1	0	0	0	30
ppy_retrop01016	8	3	4	7	6	32
ppyiretrom29687	0	0	0	0	1	0
ppy_retrom16537	1	0	0	0	0	0
ppy_retrom07661	0	0	0	0	0	0
ppy_retrop08033	2	0	1	4	3	0
ppy_retrop08030	0	0	0	2	59	0
ppy_retrop18019	1	0	5	0	0	2
ppy_retrop08027	0	0	0	0	1	0
ppyiretrom40310	0	0	0	0	0	0
ppyiretrop31583	0	0	0	0	0	8
ppy_retrom07399	13	6	8	10	19	13
ppy_retrom10951	1	0	0	0	1	6
ppyiretrom01792	0	0	0	0	0	0
ppy_retrom10957	0	0	0	0	0	0
ppy_retrop10227	2	0	3	1	1	0
ppy_retrom15358	0	0	0	0	0	0
ppy_retrom10954	0	0	2	0	0	0
ppy_retrom07390	361	115	348	253	1428	477
ppy_retrop10229	0	0	0	0	0	0
ppy_retrom11314	19	25	26	28	25	209
ppy_retrom15350	0	0	0	2	0	0
ppy_retrop16387	0	0	4	0	0	4
ppy_retrom02151	3	0	3	7	7	0
ppy_retrom02152	0	1	0	0	0	0
ppy_retrom17601	1	1	3	1	0	1
ppy_retrom02155	0	0	0	12	1	9
ppy_retrom08778	2	4	1	1	0	5
ppy_retrop06981	2	0	1	2	1	0
ppy_retrom12150	1	2	1	0	0	1
ppy_retrom12152	2	0	0	0	0	0
ppy_retrom12155	0	0	0	0	1	0
ppyiretrom32100	0	0	0	0	0	0
ppyiretrop38056	1	0	0	0	0	0
ppy_retrom08771	0	1	1	2	1	3
ppyiretrom40954	0	0	0	0	0	0
ppy_retrop10829	0	1	0	1	0	4
ppy_retrop13256	2	2	1	5	4	0
ppy_retrom17605	1	0	24	44	53	45
ppyiretrom10902	0	2	1	1	0	0
ppy_retrop10825	1	1	0	0	0	6
ppy_retrop10794	0	0	0	0	0	0
ppy_retrop10795	2	0	1	0	0	10
ppy_retrom10838	1	0	0	0	0	4
ppy_retrom06927	0	0	0	0	0	0
ppyiretrom37977	0	0	0	0	0	0
ppy_retrom06920	0	0	0	0	0	345
ppy_retrom06923	2	0	2	5	3	13
ppy_retrop09660	0	0	0	0	0	0
ppy_retrop06987	0	0	0	0	0	0
ppy_retrop01651	0	0	0	0	0	0
ppy_retrom06928	0	0	0	1	1	0
ppy_retrom10836	0	0	0	0	2	0
ppy_retrom15114	0	0	0	0	0	1
ppy_retrop06333	3	1	0	0	1	2
ppy_retrop18165	0	0	0	0	0	0
ppy_retrop19429	0	0	1	0	0	0
ppy_retrop01494	0	0	0	1	6	0
ppy_retrop17604	0	0	0	0	0	2
ppyiretrom20460	0	0	0	0	0	3
ppy_retrom17979	1	1	3	5	2	7
ppy_retrom16534	2	0	0	1	1	0
ppy_retrom06764	0	1	0	0	0	2
ppy_retrom11055	0	0	0	0	0	0
ppyiretrop28863	32	11	30	28	39	0
ppyiretrom01468	1	0	0	0	0	0
ppy_retrom08552	0	0	0	0	0	0
ppy_retrom08550	0	1	1	0	5	0
ppy_retrom08556	0	0	0	0	0	1265
ppy_retrom08557	0	0	0	0	0	0
ppy_retrom16103	0	1	1	2	0	6
ppy_retrop17757	0	0	0	0	0	1
ppy_retrop00893	1	0	0	0	0	0
ppy_retrop10172	0	0	0	0	1	0
ppy_retrop10173	0	0	0	0	0	0
ppy_retrop10171	2	0	2	1	2	13
ppyiretrop38792	0	0	0	1	0	3
ppyiretrop02486	0	0	0	0	0	5
ppy_retrom15666	1	0	0	0	1	3
ppy_retrom02272	1	0	1	14	9	168
ppyiretrom20649	1	1	1	1	2	6
ppy_retrop07899	0	0	1	0	0	0
ppyiretrop05599	17	3	40	14	17	0
ppy_retrom01386	0	0	0	0	0	7
ppy_retrop17754	0	0	3	0	1	0
ppy_retrop10952	0	0	0	0	0	0
ppy_retrop10828	0	0	0	0	0	0
ppy_retrop07891	0	0	0	0	0	4
ppyiretrop35713	0	0	0	0	0	0
ppy_retrop13319	1	0	0	0	0	9
ppy_retrom17573	2	1	0	2	2	2
ppyiretrop09128	1	0	0	0	0	0
ppy_retrop09714	5	0	3	2	3	0
ppy_retrop09715	3	2	3	7	5	5
ppy_retrom01544	0	0	0	0	0	0
ppy_retrom10631	0	0	1	1	2	6
ppy_retrom16169	0	0	1	3	1	0
ppy_retrop00635	7	6	7	1	2	148
ppyiretrop04418	0	0	0	0	0	0
ppy_retrop00637	0	0	0	0	0	1
ppy_retrop00639	0	0	1	0	0	0
ppyiretrom41371	0	0	2	0	0	1
ppy_retrop16339	1	0	0	2	0	1
ppyiretrom31415	0	0	0	0	1	5
ppy_retrop01727	0	0	0	0	0	0
ppy_retrop05293	7	2	0	0	1	6
ppy_retrom15227	2	1	0	3	0	0
ppy_retrop07949	0	0	1	0	0	2
ppy_retrop07948	1005	276	349	567	111	2270
ppy_retrom15222	0	1	0	1	0	0
ppy_retrop17303	0	0	0	0	0	0
ppyiretrop27159	0	0	0	0	0	0
ppy_retrop10556	1	0	0	0	0	0
ppyiretrom23400	0	0	0	0	0	3
ppy_retrop11207	0	0	0	0	0	0
ppy_retrop11206	1	0	0	0	0	0
ppy_retrop16257	0	0	0	0	0	0
ppy_retrop16524	0	0	0	1	0	0
ppy_retrop16251	1	0	0	9	3	13
ppy_retrop16250	3	4	18	69	20	22
ppyiretrop38963	1	0	3	2	0	3
ppy_retrop16252	0	1	0	0	0	0
ppy_retrom11549	0	0	0	0	0	0
ppyiretrom21682	0	0	0	0	0	0
ppy_retrom17686	0	0	0	0	0	0
ppy_retrop13081	0	0	0	0	0	0
ppyiretrop19604	0	0	0	0	0	0
ppy_retrom18337	1	3	8	3	6	18
ppy_retrop15211	0	0	0	0	0	8
ppyiretrop16824	0	0	0	0	0	0
ppy_retrom18334	0	1	0	0	1	1
ppy_retrom09047	1	1	0	0	0	0
ppy_retrop07094	0	0	0	0	0	0
ppy_retrom10498	1	0	8	0	3	8
ppy_retrop07096	0	0	0	6	1	21
ppy_retrom10496	4	0	0	1	7	3
ppyiretrom37295	1	0	0	1	0	0
ppy_retrom15699	2	1	0	0	3	0
ppy_retrop13082	0	0	0	0	0	0
ppy_retrom13122	1	2	0	1	0	5
ppy_retrop16237	1	0	0	0	0	35
ppyiretrom12532	1	1	0	0	0	0
ppy_retrop00528	0	1	0	1	0	3
ppyiretrom30079	0	0	0	0	0	1
ppyiretrom41191	1	0	0	0	0	1
ppyiretrop09047	6	2	8	2	3	36
ppy_retrom12875	0	0	1	7	0	7
ppy_retrom11309	0	4	0	3	2	6
ppy_retrop09801	5	10	2	8	6	28
ppy_retrop16419	148	18	44	41	77	1
ppy_retrom17787	1	4	2	0	0	2
ppyiretrop22274	0	0	0	0	0	0
ppyiretrop12591	6	2	1	2	0	3
ppy_retrop16416	4	2	1	2	2	0
ppyiretrom05633	0	0	0	0	0	0
ppyiretrom33073	6	1	6	10	6	15
ppyiretrop22777	0	0	0	0	0	2
ppy_retrop16627	0	0	0	0	2	0
ppy_retrom10308	0	0	0	1	0	0
ppy_retrom18153	0	0	0	0	0	0
ppy_retrom18152	0	0	0	0	0	0
ppy_retrop16631	0	0	1	0	0	0
ppy_retrom15112	2	1	1	0	1	0
ppy_retrom18157	0	0	0	0	0	0
ppy_retrom13129	0	0	0	0	0	0
ppy_retrom18155	0	0	0	0	0	1
ppyiretrom00221	2	0	0	0	0	2
ppyiretrom34540	542	223	746	1017	1325	2864
ppy_retrop07167	32	31	30	17	25	20
ppyiretrom41994	0	0	0	0	0	0
ppy_retrop07161	2	1	1	1	2	9
ppyiretrop06338	0	1	0	0	0	0
ppy_retrom15170	0	0	0	0	0	1
ppy_retrom17869	0	1	0	1	2	0
ppyiretrop37738	0	0	0	0	0	3
ppyiretrom29210	0	0	0	0	0	0
ppy_retrop07364	17	12	9	9	7	14
ppy_retrop17651	0	0	0	0	0	0
ppy_retrom10012	0	0	1	0	2	0
ppy_retrom03970	4	0	1	1	0	3
ppyiretrom25768	0	0	1	1	0	0
ppy_retrom10547	3	0	49	169	248	2
ppy_retrom17045	5	2	3	3	0	5
ppy_retrom10014	0	0	0	0	1	0
ppy_retrop06144	0	1	0	1	0	3
ppyiretrom12791	6	9	4	12	4	16
ppy_retrom12536	0	0	0	0	0	0
ppy_retrom12373	0	0	0	0	0	4
ppyiretrop26220	19	15	16	15	8	1087
ppyiretrom33676	7	6	16	37	31	18
ppy_retrom16318	0	0	0	1	0	0
ppy_retrom05018	0	0	0	0	0	0
ppy_retrop17697	0	0	0	0	0	10
ppyiretrom10376	0	0	0	0	0	0
ppy_retrop17692	0	0	0	0	0	1
ppyiretrom32175	0	0	0	0	0	0
ppy_retrom17266	0	0	0	0	0	0
ppy_retrom17268	0	0	0	0	0	0
ppy_retrop10474	0	0	0	0	0	1
ppy_retrom05015	3	3	3	2	1	0
ppy_retrop13675	37	15	10	27	30	0
ppy_retrop16740	0	0	0	1	0	0
ppyiretrop40549	8	4	6	8	15	6
ppy_retrom02714	0	0	0	0	5	8
ppy_retrom01025	0	0	0	0	0	0
ppyiretrom38238	0	0	1	0	1	0
ppyiretrop15865	240	24	0	341	0	0
ppyiretrop31225	3	4	2	5	9	30
ppyiretrop28103	0	0	0	0	0	0
ppy_retrom10829	0	0	0	0	0	0
ppyiretrom38231	0	0	0	0	0	6
ppy_retrop19236	2	0	0	1	0	2
ppy_retrop19232	3	4	2	1	0	0
ppyiretrom29103	0	0	0	0	1	0
ppyiretrom38408	2	0	1	1	0	9
ppy_retrop12082	1	0	0	1	3	15
ppyiretrom14260	1	1	1	2	1	1
ppy_retrom07870	36	15	25	56	36	92
ppy_retrop12085	0	0	0	0	0	0
ppyiretrom29108	0	1	0	0	0	0
ppyiretrom19612	0	0	0	0	0	0
ppy_retrop14458	3	2	0	0	1	221
ppy_retrop13686	0	0	0	0	0	0
ppyiretrom09475	1	0	0	0	6	0
ppy_retrop09066	8	2	4	19	11	0
ppy_retrom06727	0	0	0	0	0	0
ppy_retrop06703	1	0	1	2	3	3
ppy_retrom06725	0	0	0	0	0	0
ppy_retrop09061	0	0	0	4	0	3
ppyiretrop21343	2	1	6	4	7	0
ppy_retrop17342	0	0	0	0	0	0
ppy_retrop13044	1	0	1	0	1	5
ppyiretrop21347	0	1	2	5	0	8
ppyiretrom25834	0	0	0	0	0	0
ppy_retrom16225	0	0	0	0	0	0
ppy_retrom16224	0	0	0	0	1	0
ppy_retrom02432	0	0	0	0	0	1
ppyiretrop43491	1	3	1	1	1	2
ppy_retrom02437	0	0	0	0	0	1
ppyiretrop04716	19	6	5	9	9	10
ppy_retrom16044	3	0	0	0	1	2
ppy_retrop12534	0	0	0	0	0	0
ppy_retrop12536	0	1	0	1	2	2
ppy_retrop12537	0	0	0	0	0	0
ppyiretrop17812	0	0	0	0	0	0
ppy_retrop02461	0	0	0	0	0	0
ppy_retrop19032	0	0	0	0	0	0
ppyiretrom09763	0	0	0	0	0	0
ppy_retrom12408	0	0	0	0	0	0
ppy_retrop04853	5	6	2	4	1	9
ppy_retrom10825	85	37	28	34	15	8
ppy_retrop14634	150	66	78	226	76	287
ppyiretrom03032	0	0	0	0	0	0
ppyiretrop20325	0	0	0	0	0	0
ppy_retrop01338	0	0	0	0	1	0
ppy_retrop11181	2	0	3	4	0	0
ppy_retrom01843	43	18	62	137	156	64
ppy_retrom15284	1	0	1	1	1	0
ppyiretrop35931	0	2	4	1	0	13
ppy_retrop02607	0	0	0	0	0	0
ppyiretrop43126	0	0	0	0	0	4
ppy_retrop02605	0	0	0	0	0	0
ppy_retrom01844	1	0	0	0	0	12
ppyiretrop01603	12	0	1	0	4	3
ppy_retrop14246	2	3	1	0	0	5
ppy_retrop06565	1	1	2	8	2	0
ppy_retrop15159	0	0	0	0	1	0
ppy_retrom15026	0	0	1	1	3	13
ppy_retrop01296	0	0	0	0	0	0
ppy_retrop02500	0	0	0	0	0	0
ppy_retrop05145	0	0	0	0	0	0
ppy_retrom06432	2	2	0	0	0	1
ppyiretrom14719	0	0	2	1	1	0
ppy_retrop19039	0	1	0	1	0	0
ppyiretrom26200	3	0	1	6	0	0
ppy_retrop14483	0	0	0	0	0	2
ppy_retrop06366	0	0	1	0	1	70
ppy_retrop18908	0	0	0	0	0	0
ppy_retrom16133	0	0	0	0	0	0
ppy_retrop13642	0	0	0	0	0	0
ppy_retrop16758	0	0	0	0	0	0
ppyiretrop42831	0	0	0	0	4	1
ppy_retrom11831	0	0	0	0	0	0
ppyiretrop04330	0	0	0	0	0	0
ppyiretrop34670	3	3	0	1	1	31
ppyiretrop42548	2	1	8	2	0	0
ppy_retrom13762	1	0	0	1	0	4
ppy_retrop01867	7	7	6	3	2	11
ppy_retrom11839	1	0	0	1	3	1
ppyiretrop15168	0	0	0	0	0	1
ppy_retrop12623	0	0	0	0	0	0
ppy_retrom04729	0	0	0	0	0	7
ppy_retrom07520	0	0	0	0	0	0
ppy_retrom07525	88	48	52	124	111	276
ppyiretrom10395	0	0	0	0	0	0
ppyiretrop04334	0	0	0	0	0	0
ppyiretrop07281	215	183	36	66	20	87
ppy_retrom01255	0	0	0	0	0	0
ppy_retrom07708	0	0	0	0	0	0
ppy_retrop04637	0	0	0	0	0	0
ppy_retrop01466	0	0	0	0	0	0
ppy_retrop16685	31	4	26	115	75	226
ppy_retrom07703	4	4	0	3	3	10
ppy_retrom07700	1	0	0	0	0	0
ppy_retrom07701	0	0	0	1	0	0
ppy_retrom07706	0	0	1	1	0	2
ppy_retrom07707	0	0	0	0	0	0
ppy_retrom12098	0	0	0	0	0	3
ppy_retrom12099	0	1	0	0	0	0
ppyiretrom01490	0	1	0	0	0	0
ppyiretrop21515	0	0	0	0	0	0
ppy_retrom15281	3	7	2	3	3	16
ppyiretrom29922	0	0	0	2	0	0
ppy_retrop13465	60	58	152	47	165	2
ppy_retrom12091	0	0	0	1	0	14
ppyiretrom28436	0	0	0	1	0	0
ppy_retrom12094	0	0	0	0	0	0
ppy_retrom12095	0	0	0	0	0	0
ppyiretrom12887	1	0	0	0	0	2
ppy_retrom16301	0	0	0	1	0	0
ppy_retrom02091	10	1	4	6	15	26
ppyiretrom40932	1	1	4	6	7	27
ppy_retrop15136	0	0	0	0	1	0
ppy_retrop09245	0	0	0	0	0	0
ppy_retrop09243	0	0	0	0	0	0
ppy_retrom02097	0	1	1	1	0	1
ppy_retrom11948	0	0	0	0	0	0
ppy_retrom12560	1	0	0	1	0	0
ppy_retrom11944	0	0	0	0	0	0
ppy_retrom12566	0	1	1	2	0	0
ppy_retrop06969	0	0	2	0	0	14
ppy_retrom08941	0	0	0	0	0	0
ppy_retrom08940	15	10	10	5	8	138
ppy_retrom13301	110	18	1	5	0	950
ppy_retrom15445	0	0	0	0	0	0
ppy_retrom07419	0	0	0	0	0	0
ppy_retrom07416	115	84	175	120	156	2041
ppy_retrom13309	174	23	110	204	176	43
ppy_retrop03823	0	2	2	2	0	6
ppy_retrom11062	0	0	0	0	0	0
ppy_retrop13657	0	0	0	0	0	0
ppy_retrom11122	3	2	0	0	0	0
ppyiretrom33914	0	0	0	1	0	2
ppy_retrom01714	0	0	1	0	0	0
ppy_retrop18002	1	0	0	0	6	0
ppy_retrop10730	0	0	0	0	0	0
ppy_retrom07674	0	0	0	0	0	0
ppy_retrom11975	0	2	0	0	0	0
ppy_retrop18006	0	0	0	0	1	0
ppy_retrom07673	0	0	0	0	0	9
ppy_retrom12896	0	0	0	0	0	0
ppy_retrom11463	0	2	0	1	0	2
ppy_retrop01008	1	0	0	0	0	7
ppyiretrom01782	1	4	2	0	0	0
ppyiretrop39589	0	1	0	0	1	0
ppyiretrop29759	1	0	0	1	2	1
ppy_retrom09942	0	0	2	0	0	1
ppy_retrom12785	0	0	0	0	0	3
ppy_retrom07384	53	28	307	372	249	706
ppy_retrom10943	1	0	0	0	1	1
ppy_retrom12781	0	0	0	0	0	10
ppy_retrom09944	0	0	0	0	0	0
ppy_retrom09945	0	0	0	0	0	0
ppyiretrop28627	0	0	0	0	0	0
ppy_retrom08492	0	0	0	0	0	0
ppyiretrom23174	3	1	4	5	27	22
ppyiretrop24376	1	0	1	0	1	14
ppy_retrom12788	0	0	0	0	0	0
ppy_retrom08496	0	0	0	0	0	1
ppy_retrom12414	0	0	0	0	1	0
ppy_retrom12145	0	1	0	1	1	6
ppy_retrom12410	4	1	10	22	12	25
ppyiretrop42610	2	1	1	2	4	0
ppyiretrom13090	0	0	0	0	0	0
ppy_retrom13417	0	0	0	0	0	1
ppy_retrom08702	0	0	0	0	0	2
ppy_retrom02365	0	0	0	0	0	3
ppy_retrom08707	0	0	0	1	6	0
ppyiretrop28775	0	0	0	0	1	0
ppyiretrop39153	0	0	0	0	0	1
ppyiretrom26719	0	0	0	0	0	0
ppy_retrom05023	0	0	0	0	0	0
ppyiretrop32113	1	0	0	0	0	25
ppy_retrop17116	294	96	538	2001	4688	616
ppyiretrop32440	0	0	0	0	0	0
ppy_retrop11449	1	5	2	2	11	43
ppy_retrop10769	1	1	5	2	5	27
ppy_retrop09655	0	1	0	2	5	11
ppy_retrom01626	1	2	1	3	6	2
ppyiretrop30602	0	0	0	0	0	0
ppy_retrop09651	0	1	0	0	0	1
ppy_retrop09652	0	4	2	1	0	6
ppy_retrop01642	0	0	0	1	1	13
ppyiretrom03411	0	0	0	0	0	0
ppyiretrop09841	0	0	0	0	0	0
ppy_retrop18175	0	0	0	0	0	1
ppy_retrop09658	0	1	0	0	0	104
ppy_retrop17637	0	1	2	1	4	0
ppyiretrom03417	46	21	26	59	48	16
ppyiretrom34991	0	0	0	0	0	0
ppy_retrop01901	0	0	0	0	0	3
ppy_retrom09838	8	4	3	38	5	21
ppy_retrom09839	1	1	0	1	1	6
ppy_retrom09836	0	0	0	0	0	22
ppy_retrop16750	0	0	0	0	0	0
ppyiretrop38037	7	9	3	6	2	5
ppy_retrop13857	0	0	0	0	0	3
ppy_retrom09831	0	0	0	0	0	0
ppy_retrom15789	0	0	0	0	0	0
ppyiretrom40761	1	2	1	1	0	4
ppyiretrom35924	0	0	0	0	0	0
ppy_retrom15783	9	5	6	17	13	16
ppyiretrop03274	0	0	0	0	0	0
ppyiretrop36808	51	24	7	23	20	4
ppy_retrom15787	0	0	1	0	0	0
ppy_retrom15786	1	0	0	0	0	2
ppy_retrom16540	0	0	0	0	0	0
ppyiretrom20631	23	13	14	7	5	6
ppy_retrom09146	1	0	1	0	0	0
ppy_retrop07399	1	0	0	0	0	3
ppyiretrom40582	24	25	66	43	65	6
ppy_retrop15191	803	252	426	366	310	310
ppy_retrop07885	0	1	1	0	1	1
ppyiretrom10803	11	3	0	7	3	9
ppy_retrop15196	1	1	2	0	0	4
ppy_retrop07880	1	5	0	0	0	0
ppy_retrop15194	4	1	1	1	2	3
ppy_retrop15198	1	0	0	0	2	5
ppy_retrop00600	19	9	3	18	18	0
ppy_retrop07888	0	0	0	0	0	0
ppyiretrom41697	6	7	5	7	3	6
ppy_retrom13333	0	0	0	0	0	2
ppy_retrop09724	0	0	4	1	0	5
ppyiretrom12219	0	1	0	0	0	0
ppyiretrop03807	0	0	0	0	0	0
ppyiretrom41364	4	0	4	1	0	5
ppyiretrop14994	0	1	0	0	0	0
ppy_retrop11560	0	0	0	0	0	0
ppyiretrom24202	54	16	84	128	124	194
ppy_retrop16634	0	0	0	0	0	0
ppy_retrop10567	0	0	0	0	0	0
ppyiretrop28749	50	45	21	41	72	29
ppy_retrop10560	0	1	0	1	0	1
ppy_retrop10563	137	87	213	355	527	433
ppyiretrop18072	0	0	0	0	0	0
ppy_retrop07952	0	1	0	0	0	0
ppy_retrop07954	1	0	1	2	3	13
ppy_retrop10568	0	1	0	0	0	0
ppy_retrop16534	0	0	0	1	0	0
ppyiretrom15056	0	0	0	1	0	0
ppy_retrom14072	0	0	0	0	0	0
ppy_retrom17674	3	2	0	1	3	0
ppy_retrop16246	0	1	0	0	0	0
ppy_retrop18488	0	0	0	0	0	0
ppy_retrom17671	0	0	0	0	0	0
ppyiretrop31178	0	0	0	0	0	0
ppy_retrop15992	6614	1359	2792	2067	2810	5681
ppy_retrop15227	1	0	0	0	0	0
ppy_retrop10614	1	1	0	0	3	1
ppy_retrop15221	3	5	3	0	0	0
ppyiretrop27744	0	0	0	1	0	0
ppyiretrom20741	0	0	1	0	1	6
ppy_retrom17678	1	1	0	1	0	4
ppy_retrom09051	0	0	0	0	0	12
ppy_retrop07773	0	0	0	0	0	0
ppyiretrom00033	6	6	6	30	15	51
ppy_retrom09055	0	0	0	0	0	2
ppy_retrom05950	0	0	0	0	0	0
ppy_retrop10587	0	0	0	0	0	0
ppyiretrom29352	1	0	1	0	1	0
ppyiretrop18095	0	0	0	0	0	0
ppy_retrom18328	5	7	3	4	0	8
ppy_retrom12842	0	0	0	0	0	0
ppyiretrom41185	1	0	1	1	1	0
ppy_retrom17155	107	53	59	64	58	137
ppy_retrop18591	0	0	0	3	1	2
ppy_retrop18592	0	0	0	0	0	2
[truncated: 3,131 more rows]

## Sheet: Macaque
# Supplemental Table S2: Retrocopy expression (≥1 unique read) in macaque
# The number of unique reads refers to those mapped in all samples from the same organ
# The number of unique reads mapping on each retrocopy locus (as defined in Supplemental Table S1) was obtained using the CoverageBed function from the Bedtools suite.
retro_ID	Brain	Cerebellum	Heart	Kidney	Liver	Testis
mmu_retrom16382	0	1	0	0	0	3
mmu_retrom30283	0	0	0	0	0	0
mmu_retrom27171	0	0	0	0	0	0
mmu_retrop16002	4	0	0	0	0	0
mmuiretrop28685	1	0	0	0	0	0
mmu_retrom16385	0	1	1	0	0	30
mmu_retrom37066	7	7	1	0	0	0
mmu_retrom24443	0	0	0	0	0	1
mmu_retrop36883	7	7	3	0	0	27
mmu_retrom37147	7	10	4	5	2	5
mmu_retrom23787	4	0	0	4	4	3
mmuiretrop34034	0	0	1	0	0	0
mmu_retrop36411	3	0	0	0	0	0
mmu_retrom16147	7	1	1	1	0	32
mmu_retrop23844	2	2	2	4	4	7
mmu_retrom34677	1	1	0	0	0	0
mmu_retrop36419	0	1	0	0	0	0
mmu_retrom34675	1	0	1	0	0	89
mmu_retrom34673	0	0	0	0	0	0
mmu_retrop35675	48	41	32	14	7	69
mmu_retrom30575	0	0	0	0	0	0
mmuiretrop28691	0	0	1	0	0	3
mmu_retrop23548	53	20	19	13	20	171
mmu_retrop12159	0	1	1	1	1	0
mmu_retrom05446	1	1	1	1	0	4
mmu_retrom05448	0	0	0	0	0	1
mmu_retrop09628	2	1	0	3	1	10
mmuiretrom21279	0	0	0	1	0	1
mmu_retrom07698	2	6	3	0	9	15
mmu_retrop27129	5	2	4	2	4	3
mmu_retrop16318	358	128	73	54	34	892
mmu_retrop27724	28	22	35	12	9	74
mmu_retrom20854	2	1	1	1	0	6
mmu_retrom26350	7	3	1	1	1	28
mmu_retrom22974	0	0	0	0	0	0
mmu_retrop36805	3	0	0	0	0	979
mmu_retrom22919	18	10	1	3	1	3
mmu_retrom25874	0	0	0	0	0	0
mmu_retrop27059	0	0	0	0	0	0
mmuiretrom31184	68	25	48	54	39	305
mmu_retrop36899	3	0	0	0	0	1
mmu_retrop14997	18	18	9	17	7	12
mmu_retrop38990	2	1	0	1	0	7
mmu_retrom37453	26	1	0	0	3	1
mmu_retrop27438	1	0	0	0	0	1
mmu_retrom15542	12	15	3	4	0	9
mmu_retrop29625	10	5	3	1	4	235
mmuiretrom24925	0	0	0	0	0	5
mmuiretrop05804	0	0	0	0	0	0
mmuiretrom03008	1	0	1	0	0	1
mmu_retrom37396	1	0	1	1	0	0
mmu_retrom12067	0	0	0	1	0	2
mmu_retrop22892	0	0	0	0	0	0
mmu_retrom12064	0	0	0	0	0	1
mmu_retrop36528	0	0	0	0	0	4
mmu_retrom17084	0	0	0	0	0	0
mmu_retrop36256	5	13	1	4	11	2
mmuiretrom10892	0	0	0	0	0	1
mmuiretrop12513	0	0	0	0	0	6
mmu_retrom17080	1	1	0	0	59	0
mmu_retrom38363	5	1	6	1	1	4
mmu_retrop24906	1	0	0	0	0	0
mmu_retrop38513	12	12	5	1	17	11
mmuiretrop18288	8	15	1	4	2	8
mmuiretrop06599	1	1	0	0	0	0
mmuiretrom30101	0	0	0	0	0	0
mmu_retrom28620	1	1	0	0	0	0
mmu_retrop13772	186	47	46	43	52	626
mmu_retrom33716	1	2	1	0	0	10
mmu_retrop36090	0	0	0	0	0	4
mmu_retrop23910	34	15	28	128	101	22
mmuiretrop22305	93	14	38	12	54	518
mmu_retrop28276	56	46	6	16	24	61
mmuiretrop35561	0	0	0	0	0	1162
mmu_retrop37781	4	4	1	1	0	10
mmu_retrom35479	1	0	0	0	1	7
mmu_retrop06623	0	0	0	1	0	0
mmu_retrop09577	0	0	0	0	0	121
mmu_retrop04537	82	10	7	5	1	38
mmuiretrop29315	8	1	10	1	6	14
mmu_retrom31626	22	5	7	13	9	48
mmu_retrop23591	0	1	0	0	0	3
mmuiretrop11959	0	0	0	0	0	2
mmu_retrom27448	0	0	0	0	0	0
mmu_retrop07715	12	7	2	5	1	17
mmu_retrom23856	263	10	1	2	28	555
mmu_retrop25618	2	0	0	0	0	0
mmu_retrop07712	0	0	0	0	0	1
mmu_retrop09579	0	1	0	0	0	0
mmu_retrop09087	56	26	7	8	5	44
mmuiretrop05936	0	0	1	0	0	4
mmu_retrom28413	4	0	1	0	0	0
mmu_retrom06336	6	5	2	2	1	13
mmu_retrop17061	0	0	0	1	0	2
mmu_retrom32347	1	0	0	0	0	2
mmu_retrom32846	4	1	1	1	0	5
mmu_retrop12545	8	3	1	1	2	6
mmu_retrop17064	0	0	0	0	0	0
mmu_retrop32179	0	0	0	0	0	4
mmu_retrom34296	0	0	0	0	0	0
mmu_retrom17179	0	1	0	0	0	5
mmu_retrom16368	3	0	0	0	0	19
mmu_retrom32460	28	26	5	0	0	5
mmu_retrom16364	10	0	3	0	0	1510
mmuiretrop25788	0	0	0	0	1	6
mmu_retrom16367	5	0	0	0	0	0
mmu_retrom32525	0	0	0	2	2	2
mmu_retrom17177	0	0	0	0	0	0
mmu_retrop32177	403	88	112	85	120	298
mmu_retrop35346	0	0	0	0	0	0
mmuiretrop24266	2	0	2	1	7	0
mmu_retrop08972	0	0	0	0	0	22
mmu_retrop06712	0	0	0	0	0	9
mmu_retrom30029	0	0	0	0	0	0
mmuiretrop29222	0	0	1	0	0	9
mmuiretrop22235	2747	486	859	570	1772	12805
mmu_retrop28470	0	0	3	1	0	6
mmu_retrom11865	0	0	0	1	0	0
mmu_retrom11862	0	0	0	0	0	0
mmu_retrom11863	5	0	3	0	1	12
mmu_retrom30021	8	8	1	1	2	1
mmu_retrom35500	2	2	0	0	0	0
mmuiretrom15651	2	1	1	0	2	6
mmu_retrop08577	0	0	0	0	0	6
mmu_retrom31718	0	0	0	0	0	0
mmuiretrom12411	0	0	0	0	0	0
mmu_retrom31715	311	81	219	103	373	122
mmuiretrop25015	1	3	6	0	2	5
mmu_retrop09883	0	0	0	0	0	5
mmu_retrop08377	2	1	1	0	0	5
mmu_retrom09986	0	0	0	0	0	0
mmu_retrom09987	0	0	0	0	0	3
mmu_retrom12118	14	6	3	3	2	11
mmuiretrom25936	0	0	3	1	0	5
mmu_retrom15723	1	1	0	0	2	8
mmu_retrom29058	0	0	0	0	0	0
mmu_retrop17666	1	3	0	0	0	1
mmu_retrop27946	0	1	0	0	0	0
mmuiretrom19732	0	0	0	0	0	1
mmuiretrop33282	0	0	0	0	0	0
mmuiretrom11700	1	0	3	0	0	0
mmuiretrom19049	0	0	0	1	0	111
mmu_retrop33316	2	0	2	1	0	2
mmuiretrom36980	224	132	41	23	53	235
mmu_retrom27107	1	12	1	0	1	2
mmu_retrop32774	5	3	1	4	0	21
mmu_retrop26099	0	0	0	0	0	8
mmu_retrop22121	0	0	0	0	0	4
mmu_retrom30978	0	0	0	0	0	0
mmu_retrop35476	0	0	0	0	0	0
mmu_retrom17638	0	0	0	0	0	0
mmu_retrop33131	3	1	0	0	0	0
mmu_retrop24817	0	0	1	0	0	0
mmu_retrop24366	0	0	0	0	0	0
mmu_retrop07246	5	5	6	2	0	7
mmu_retrop24936	0	1	0	2	0	2
mmu_retrom32266	0	0	1	0	0	4
mmu_retrop17685	77	18	92	47	43	51
mmu_retrop32951	1	0	0	2	0	11761
mmu_retrop25541	11	6	2	3	0	400
mmu_retrop17682	0	0	2	0	0	0
mmu_retrop32955	1	0	0	0	0	3668
mmu_retrop07845	1	1	0	0	0	0
mmu_retrop22247	0	0	0	0	0	1
mmu_retrom30974	18	10	3	4	5	42
mmu_retrom30977	0	0	0	0	0	0
mmu_retrop33218	3	0	0	1	0	5
mmu_retrop07941	0	0	0	0	0	12
mmu_retrop32796	2	0	2	1	2	373
mmuiretrop12970	0	0	0	0	0	7
mmu_retrom37658	0	0	0	0	0	12
mmuiretrop06050	0	0	0	0	0	0
mmu_retrop04712	0	0	0	0	0	4
mmu_retrom36753	31	3	2	119	3	4
mmu_retrom36752	17	2	0	2	2	1
mmu_retrop19321	0	0	0	1	0	0
mmu_retrom13898	33	13	3	3	0	9
mmu_retrop06906	0	0	0	0	0	6
mmu_retrom13897	0	0	0	0	0	0
mmuiretrom33737	0	0	0	0	0	0
mmu_retrop14265	14	8	1	5	1	9
mmu_retrom32663	0	0	0	0	0	84
mmu_retrop17202	0	0	0	1	0	0
mmu_retrop18529	174	11	88	13	292	580
mmu_retrop39808	1	1	2	0	0	2
mmuiretrop13001	1	2	1	0	0	2
mmu_retrop39804	4	0	1	0	0	7
mmu_retrop18520	2	0	1	0	0	194
mmu_retrop39800	1	1	1	0	1	2
mmu_retrop24966	0	0	0	0	0	0
mmuiretrop07878	4	2	1	0	1	1
mmu_retrop34025	0	0	0	0	1	2
mmu_retrop19698	2	1	0	0	0	0
mmu_retrop18457	2	0	0	0	0	0
mmu_retrop36719	1	0	0	0	0	4
mmu_retrom07978	0	0	0	0	0	10
mmu_retrop33041	0	0	0	0	0	0
mmuiretrop18566	1	4	0	0	0	4
mmu_retrom10281	0	0	0	0	0	0
mmuiretrom37928	15	8	6	0	0	4
mmu_retrop10098	0	0	0	0	0	1
mmuiretrom08141	0	0	0	0	0	1
mmu_retrop24705	4	0	0	0	0	0
mmu_retrom10286	77	27	73	115	219	91
mmu_retrop08755	0	0	0	0	0	0
mmu_retrop08754	0	0	1	0	0	0
mmu_retrop05721	0	0	0	0	0	13
mmu_retrop33682	0	0	0	0	0	0
mmu_retrom36635	5	0	0	0	0	3
mmu_retrom27218	7	8	1	5	13	31
mmu_retrom23750	6	5	0	2	0	6
mmu_retrop40029	0	0	0	0	0	0
mmu_retrop08283	0	0	0	0	0	0
mmu_retrop24495	0	0	0	0	0	0
mmuiretrop10926	0	0	0	0	0	1
mmu_retrop19216	0	0	0	0	0	0
mmu_retrop10301	2	0	0	0	0	5
mmu_retrop19215	27	5	4	1	7	12
mmu_retrom21200	80	10	3	7	7	32
mmu_retrop40026	1	1	0	0	0	2
mmu_retrop19210	3	5	0	3	2	9
mmu_retrop04666	0	0	0	0	0	11
mmu_retrop17849	0	1	0	0	0	4
mmu_retrop27729	353	257	326	269	152	794
mmu_retrom23615	1	2	2	0	0	5
mmu_retrom24287	0	0	29	0	0	1
mmu_retrom22425	309	172	82	81	54	2051
mmuiretrop18414	4	0	3	1	1	6
mmu_retrop17847	0	0	0	0	0	0
mmu_retrop34333	4	1	2	1	0	6
mmuiretrom22597	0	0	0	0	0	0
mmu_retrom36778	0	0	0	2	0	0
mmu_retrop26896	7	8	3	0	1	33
mmu_retrop12237	0	0	1	0	1	0
mmuiretrom35560	708	225	131	114	141	424
mmu_retrop34244	0	0	0	0	1	12
mmu_retrom27436	1	2	4	2	1	254
mmu_retrom26921	2	1	0	0	0	0
mmu_retrop34249	97	31	100	43	85	511
mmu_retrop38196	0	0	1	0	0	0
mmu_retrop19586	3	0	0	1	0	2
mmuiretrom27114	0	0	0	0	0	0
mmu_retrop09298	3	3	0	0	0	42
mmu_retrop24639	41	16	3	4	5	28
mmu_retrop24143	1	0	0	0	1	6
mmuiretrom14087	1	0	1	15	0	4
mmu_retrop24273	2	0	6	0	0	4
mmu_retrop19858	0	0	0	0	0	0
mmu_retrop14881	0	0	0	0	0	0
mmu_retrom30453	1	0	0	0	0	2
mmu_retrom35279	2	0	0	1	1	2
mmu_retrom36964	1336	681	826	747	1116	1306
mmu_retrom36830	0	0	0	0	0	0
mmu_retrom36831	1	0	0	0	1	1
mmu_retrom36837	0	0	0	0	0	0
mmu_retrop22837	0	0	0	0	0	0
mmu_retrom36835	0	0	0	0	0	0
mmu_retrom10354	0	0	0	0	0	2
mmu_retrom03476	0	0	1	0	0	1
mmu_retrom37830	1	0	2	0	0	0
mmu_retrom35276	0	6	6	3	8	13
mmu_retrop40488	0	0	0	0	0	2
mmuiretrop06907	5	4	1	7	4	15
mmu_retrom09754	0	0	0	0	0	8
mmu_retrop30835	0	0	0	0	0	0
mmu_retrom30686	2	0	0	0	0	2
mmuiretrom18552	0	1	0	0	0	281
mmu_retrop40483	0	0	0	0	0	0
mmu_retrop19106	0	0	0	0	0	0
mmu_retrom15933	0	0	0	0	0	0
mmu_retrom30277	2	1	1	0	0	16
mmuiretrom34761	1	1	0	0	0	2
mmu_retrop27543	0	0	0	1	0	2
mmuiretrop30696	1	0	0	0	0	2
mmu_retrom28986	0	0	0	0	0	7
mmuiretrop27789	0	0	0	0	0	545
mmu_retrop38687	0	0	0	0	0	0
mmu_retrop38680	9	7	0	0	0	0
mmu_retrom31160	117	7	38	5	9	10
mmu_retrop38682	0	0	0	1	0	0
mmu_retrom16945	2	1	2	0	0	5
mmu_retrom25906	1	1	1	1	0	37288
mmu_retrom32649	0	0	0	0	0	2
mmu_retrom10039	4	0	0	0	0	4
mmuiretrom16406	5	6	3	1	0	26
mmu_retrop06822	0	2	0	0	0	0
mmu_retrom29026	2	0	0	0	0	0
mmu_retrop38047	5	1	4	3	5	13
mmu_retrop16813	1	0	1	0	0	0
mmu_retrom22764	0	0	0	0	0	0
mmu_retrom04059	199	126	25	44	6	396
mmu_retrop38043	4	3	3	1	5	9
mmuiretrom24356	1	1	1	0	0	1
mmu_retrop16818	4	0	3	2	1	1309
mmu_retrop29338	0	0	0	0	0	0
mmu_retrom23843	0	0	0	0	0	0
mmu_retrop35839	7	3	14	3	8	16
mmuiretrop31237	0	0	0	0	0	0
mmu_retrom32645	0	0	0	1	0	9
mmu_retrom08596	3	2	2	0	2	5
mmu_retrom23842	2	0	0	0	0	7
mmu_retrop35142	0	0	0	0	0	4
mmu_retrop15358	0	0	1	0	0	0
mmu_retrop30231	3	3	0	0	0	4
mmuiretrom23154	0	0	0	0	0	0
mmu_retrom37906	1	1	0	0	0	0
mmu_retrom07595	6	5	5	9	2	9
mmu_retrop31548	8	0	1	0	0	2
mmu_retrop17301	1	0	0	0	0	0
mmu_retrop15895	2	0	1	0	0	12
mmu_retrop35045	0	0	4	0	0	0
mmu_retrop31545	4	6	3	0	0	2
mmu_retrop35047	0	0	0	0	0	0
mmu_retrop37303	0	0	14	0	0	3
mmuiretrop37315	0	0	0	1	0	0
mmu_retrom29125	0	0	0	0	0	2
mmu_retrom13259	1	0	0	0	0	2
mmu_retrom17415	0	0	0	0	0	0
mmu_retrom02988	14	9	0	0	0	4
mmuiretrom10407	0	0	0	0	0	10
mmu_retrom26672	0	0	0	0	0	2
mmu_retrop29563	0	0	0	0	0	0
mmu_retrom10727	5	0	5	1	1	10
mmu_retrop12017	0	0	0	0	0	0
mmu_retrop15914	4	1	0	0	0	428
mmu_retrom28470	0	0	0	0	0	5
mmu_retrop39488	2	0	0	0	0	101
mmu_retrop04890	1	1	1	0	3	4
mmuiretrop38595	0	5	2	0	2	10
mmu_retrom32538	0	0	0	0	0	3
mmu_retrom33820	0	2	0	2	1	1
mmu_retrop27600	5	0	6	5	1	5
mmuiretrom09437	3	2	3	0	1	2
mmu_retrom35087	7	7	6	7	10	51
mmu_retrom33828	6	2	3	0	2	71
mmuiretrom32989	45	6	3	10	0	3
mmuiretrom08439	1	1	1	0	0	3
mmuiretrop05690	0	1	0	0	0	95
mmu_retrom24293	0	1	0	0	0	52
mmu_retrom11728	0	0	0	0	0	0
mmu_retrom23152	0	0	0	0	0	0
mmu_retrop31129	0	0	0	0	0	27
mmu_retrom09401	1	0	0	0	0	7
mmu_retrop16497	1	0	4	0	0	9
mmu_retrom20731	1	0	0	0	0	2
mmu_retrop16920	4	3	1	4	2	4
mmu_retrop37937	0	0	2	1	0	43
mmuiretrom28685	0	0	0	0	0	0
mmu_retrom29875	72	20	11	18	16	60
mmu_retrom26582	0	0	0	0	0	1
mmu_retrom26581	67	6	29	17	28	337
mmu_retrop12588	2	1	1	0	1	3
mmu_retrom23475	17	6	1	2	18	204
mmu_retrom27432	0	0	0	0	0	66
mmu_retrop04873	2	1	2	1	0	3
mmu_retrop36403	1	7	0	0	0	1
mmu_retrop35683	0	0	1	0	48	4
mmu_retrop16364	3	0	0	3	0	100
mmu_retrop35680	0	0	0	0	0	4
mmuiretrop34028	0	0	0	1	0	0
mmu_retrop27564	0	0	0	0	0	0
mmu_retrop36791	0	0	0	0	0	0
mmu_retrop34184	1	0	0	1	0	6
mmu_retrom32884	1	1	0	1	0	0
mmuiretrom10715	0	0	0	0	0	0
mmuiretrop19619	0	0	0	0	0	0
mmu_retrom23028	206	132	19	22	20	43
mmu_retrom10611	0	3	0	1	0	1
mmu_retrom32058	0	0	0	0	0	0
mmu_retrom10614	0	0	0	0	0	0
mmu_retrom10615	0	0	0	0	0	0
mmu_retrom35572	0	0	0	0	0	0
mmu_retrop16086	0	0	0	0	0	1
mmu_retrop24263	0	0	0	0	0	333
mmu_retrom24369	0	0	0	0	0	0
mmu_retrop36881	0	1	1	0	0	0
mmu_retrom11744	5	7	2	0	7	3
mmuiretrom28190	1	0	1	0	2	8
mmu_retrop16670	0	0	1	0	0	1
mmu_retrom30945	0	0	0	0	0	1
mmu_retrop29516	0	4	1	0	0	3
mmuiretrom30452	2	0	0	0	0	6
mmu_retrom21222	0	0	0	0	0	0
mmu_retrop09367	0	1	0	1	0	2
mmuiretrom16318	0	2	0	0	0	6
mmu_retrop27558	1	1	0	0	0	1
mmu_retrom25838	1	0	0	2	0	2
mmu_retrom31278	0	0	0	1	0	8
mmu_retrop33068	0	0	0	0	1	0
mmu_retrop37688	0	0	3	1	1	0
mmu_retrop16103	94	70	22	25	20	123
mmuiretrom05914	14	2	0	1	4	14
mmu_retrop16101	32	7	88	1	454	34
mmu_retrom38359	9	5	3	2	1	7
mmu_retrop37330	1	0	0	0	0	2
mmuiretrop31255	0	0	0	0	0	0
mmu_retrom35574	3	13	0	0	2	6338
mmu_retrom13077	9	7	1	2	2	7
mmu_retrom38350	3	1	1	5	2	3
mmu_retrop19798	7	5	3	1	3	365
mmu_retrom38355	139	2	17	10	0	1741
mmu_retrop39035	0	0	0	0	0	4
mmu_retrop36532	0	0	0	0	0	4
mmu_retrop16613	3	2	1	4	0	71
mmu_retrom20626	3	1	1	2	1	5
mmu_retrom34113	0	0	0	0	0	0
mmu_retrom28611	4	0	3	0	3	6
mmuiretrop19153	0	0	0	0	0	2
mmu_retrop28243	1	1	0	1	0	2
mmu_retrop09764	0	0	0	0	0	0
mmuiretrop11096	4	0	0	0	0	4
mmu_retrom35461	0	0	0	0	0	0
mmu_retrop38853	0	0	0	0	0	0
mmu_retrom10505	0	0	0	0	0	2
mmu_retrom31983	4	2	1	2	1	7
mmu_retrom31130	17	3	0	0	1	93
mmuiretrom15447	2	0	0	0	0	0
mmu_retrom35468	5	2	1	0	0	0
mmu_retrop23100	0	0	0	0	0	0
mmu_retrop27133	13	12	2	2	4	7
mmu_retrom31989	22	7	12	11	12	31
mmu_retrop25602	13	11	13	13	8	35
mmu_retrop06631	1	0	0	0	0	0
mmu_retrop26559	8	7	0	0	0	26
mmu_retrom11921	1	0	0	1	0	6
mmu_retrom20258	0	0	0	0	0	12
mmu_retrop07723	13	4	5	8	5	57
mmuiretrop24597	2	2	5	6	14	5
mmu_retrom23285	1	0	0	0	0	0
mmu_retrop07727	4	3	1	0	1	5
mmu_retrom21464	34	28	12	10	22	42
mmu_retrom16594	151	105	115	99	95	384
mmu_retrop23726	0	0	1	0	0	1
mmu_retrom10510	2	1	2	2	1	6
mmu_retrom32850	0	4	0	0	0	1
mmu_retrom20997	13	14	1	3	0	13
mmu_retrom20990	0	0	0	2	41	0
mmu_retrop32144	0	0	0	0	0	0
mmu_retrom17185	0	1	0	0	1	2
mmuiretrop21027	0	0	0	0	0	0
mmu_retrop24053	7	0	0	0	0	0
mmu_retrop38078	1	2	0	2	0	8
mmu_retrop12825	0	0	0	0	0	1
mmu_retrop07659	7	5	1	4	1	60
mmu_retrop27534	0	1	0	0	0	0
mmu_retrop09163	2	0	5	1	0	5
mmu_retrop09162	0	0	1	0	0	5
mmu_retrom17340	0	0	2	3	1	0
mmu_retrop22887	0	0	0	0	0	2
mmu_retrom30030	0	1	0	0	0	10
mmu_retrom30031	0	0	0	0	0	0
mmu_retrom30032	1	0	0	0	0	2
mmu_retrop28488	0	0	1	0	0	62
mmuiretrop27340	7	4	3	0	1	4
mmuiretrop04984	0	0	0	0	0	3
mmu_retrop06622	6	1	3	1	5	3
mmu_retrom30456	1296	438	271	317	501	6668
mmu_retrop09215	2	0	0	0	4	67
mmu_retrop09213	2	0	1	0	0	212
mmuiretrop12382	0	0	0	0	0	0
mmu_retrop33591	0	0	0	0	0	1
mmuiretrom34005	12	21	4	7	9	29
mmu_retrop08367	0	0	0	0	0	3
mmu_retrop23438	0	0	0	0	0	0
mmu_retrom12104	1	0	0	0	0	9
mmu_retrom12107	23	15	1	2	2	12
mmu_retrom12100	4	0	3	2	0	11
mmu_retrom26066	0	0	1	0	0	1
mmu_retrom23981	2	0	2	0	0	2
mmu_retrop27950	0	0	0	0	0	0
mmu_retrop22706	16	1	3	2	5	12
mmu_retrop27953	0	0	0	0	1	0
mmu_retrom31624	4	1	0	0	1	49
mmu_retrom06983	0	0	0	0	0	0
mmuiretrop09784	1	0	1	0	1	6
mmu_retrop33300	176	53	111	198	202	331
mmu_retrom37346	0	0	0	0	0	1
mmu_retrom32164	4	1	0	2	0	0
mmu_retrop17679	1	7	1	1	8	22
mmu_retrom06989	0	1	0	0	0	1
mmuiretrop22169	25	6	2	5	0	93
mmu_retrom30943	0	0	0	0	0	0
mmu_retrop25531	3	5	0	2	1	2
mmu_retrom06299	0	0	0	1	0	4
mmu_retrom06298	0	0	0	0	0	0
mmu_retrom32457	1	0	2	4	0	1
mmu_retrom32982	2	0	0	1	2	8
mmu_retrop33192	2	4	1	0	3	6
mmu_retrop12480	0	0	2	1	2	0
mmu_retrom32981	0	0	0	0	0	0
mmu_retrop36901	0	0	0	0	0	0
mmu_retrom33107	16	12	12	5	31	19
mmuiretrom11254	0	0	0	0	0	0
mmu_retrom32458	29	11	9	92	58	5831
mmu_retrom20841	0	0	0	0	0	1
mmu_retrom06297	37	19	13	17	53	56
mmu_retrop12489	3	1	2	0	3	0
mmuiretrop16661	7	0	4	6	11	1
mmu_retrop33123	0	0	1	0	0	2
mmu_retrop17699	2	0	0	0	0	0
mmu_retrop24827	0	0	1	0	0	0
mmu_retrop24826	58	36	35	32	54	217
mmu_retrom06966	2	0	0	0	0	1
mmu_retrom06964	1	0	0	0	0	40
mmu_retrop18628	0	0	0	0	0	0
mmu_retrom04453	1184	355	217	113	578	3115
mmu_retrom21354	1	0	0	1	0	2
mmu_retrom37642	0	0	0	0	0	0
mmu_retrom26802	2	0	0	0	0	3
mmu_retrop09984	0	1	0	0	0	2
mmu_retrom30627	5	0	2	0	1	2
mmuiretrop22043	0	0	0	0	0	0
mmuiretrop12941	1	0	0	0	0	695
mmu_retrop22789	37	11	15	2	4	6
mmu_retrom11030	3	0	0	3	0	14
mmu_retrop09988	13	12	0	3	0	4
mmu_retrop05652	3	1	1	0	1	46
mmuiretrom16706	7	1	1	0	0	2
mmu_retrop30346	1	0	1	0	2	9
mmu_retrop05656	90	55	89	44	474	99
mmu_retrom32186	0	0	0	0	0	0
mmuiretrop18717	1	0	0	0	0	0
mmu_retrom13880	6	1	1	0	0	2
mmu_retrop15750	3	2	0	0	1	2
mmu_retrom13887	0	0	0	0	0	0
mmu_retrop08177	1	0	0	0	0	18
mmuiretrop17004	184	59	27	58	25	57
mmuiretrop16066	0	0	0	1	0	0
mmuiretrop08789	0	0	0	0	0	0
mmu_retrop28155	2	0	0	0	0	87
mmu_retrom32673	5	2	0	1	2	11
mmu_retrop33230	0	1	1	0	0	12539
mmuiretrop13543	0	0	0	0	0	0
mmuiretrop13012	0	0	0	0	0	0
mmu_retrom14576	1	0	0	0	0	9
mmu_retrop32891	0	0	0	0	0	3
mmuiretrom36882	5	1	1	0	2	5
mmuiretrop35155	0	0	0	0	0	11
mmuiretrop12011	0	0	0	0	0	150
mmuiretrop08787	0	1	0	0	0	0
mmuiretrop18575	2	0	0	0	0	1
mmu_retrop24739	0	0	0	0	0	0
mmu_retrop34014	0	0	0	0	0	0
mmu_retrom10295	3	0	1	0	1	17
mmu_retrom10292	6	3	3	3	0	2
mmu_retrom10293	29	13	2	6	12	2
mmuiretrop18578	0	0	1	0	0	0
mmu_retrop25081	0	2	0	0	0	2
mmu_retrop17063	1081	310	269	201	232	1751
mmu_retrom36606	1	0	0	0	0	0
mmu_retrom34847	2	5	2	2	24	3
mmu_retrom28752	2	2	2	0	3	5
mmuiretrop21543	1	0	5	3	0	10062
mmu_retrop08743	1	0	0	0	2	0
mmu_retrom35866	0	0	0	0	0	0
mmu_retrop08746	1	0	0	0	0	0
mmu_retrom15126	2	1	1	2	2	0
mmu_retrop08032	4	5	0	0	1	0
mmuiretrop31442	0	0	0	0	3	3
mmu_retrop10318	10	1	0	1	0	1
mmuiretrom22764	0	1	0	0	0	6
mmuiretrop21789	11	2	2	0	0	11
mmuiretrop33804	1	0	0	0	0	2
mmuiretrom02952	37	8	18	10	13	27
mmu_retrop18759	1	0	0	0	0	1
mmu_retrop26607	50	28	12	7	10	167
mmu_retrom14463	3	2	0	0	1	0
mmu_retrop19260	1	0	0	0	0	19
mmu_retrop40034	0	0	0	0	0	0
mmu_retrop33449	2	2	2	6	16	2
mmu_retrop40036	0	0	0	0	0	0
mmuiretrop26932	0	0	0	0	0	1
mmuiretrom35629	0	0	0	1	0	9
mmu_retrom24054	4	0	1	1	1	1
mmuiretrop26931	1	0	1	1	1	5
mmuiretrom35992	3	4	0	0	0	0
mmu_retrom32070	2	0	0	1	0	517
mmu_retrom32071	0	0	0	0	1	61
mmu_retrop17503	0	0	0	0	0	5
mmu_retrop35302	618	92	61	38	55	195
mmu_retrop35303	2	0	0	0	0	2
mmu_retrop12226	7	8	1	3	1	5
mmuiretrop31492	1	0	0	0	0	3
mmu_retrom07817	0	1	0	2	0	0
mmu_retrom34595	0	0	0	0	0	0
mmu_retrom24232	0	0	1	0	0	21
mmu_retrop19863	0	0	0	0	0	0
mmuiretrom09336	0	1	0	0	0	400
mmu_retrop38321	1	0	0	0	0	9
mmuiretrom06816	1	0	0	2	1	1
mmu_retrop37234	2	0	0	3	6	4
mmu_retrop36054	0	0	0	0	0	1
mmu_retrop18840	0	0	0	0	0	6
mmu_retrop24604	3	0	2	0	0	0
mmu_retrom25953	0	0	0	0	0	2
mmu_retrom34358	0	0	0	0	0	0
mmu_retrop28802	48	22	2	0	8	41
mmu_retrop28801	25	16	0	0	1	2
mmu_retrop28806	0	0	0	1	0	1
mmu_retrom09748	0	0	0	0	0	1
mmu_retrom35261	0	0	0	0	0	1
mmu_retrop34648	0	0	0	0	0	17
mmu_retrom07545	33	12	13	9	33	70
mmuiretrom23564	2	3	0	0	0	0
mmu_retrom09743	22	6	4	0	3	63
mmu_retrom15239	36	1	2	2	1	1
mmu_retrom09741	63	13	6	10	17	48
mmu_retrom16900	1	0	0	0	1	0
mmu_retrom16903	1	0	0	0	0	0
mmu_retrop30824	0	0	0	0	0	2
mmu_retrom22726	0	0	0	0	7	1
mmu_retrom22725	2	0	0	0	0	1
mmu_retrom20988	0	0	0	0	0	5
mmu_retrop14747	0	1	0	0	0	26
mmu_retrop14745	4	7	1	2	2	5
mmuiretrom18543	2	0	0	0	0	0
mmu_retrom26844	2	0	0	5	13	670
mmu_retrop35408	1	1	2	0	0	3
mmuiretrop38694	8	13	1	1	0	4
mmu_retrop39523	4	2	3	4	2	5
mmuiretrom35372	1	0	0	0	0	3
mmu_retrom06090	174	61	55	53	23	266
mmuiretrop24682	4	3	0	0	0	1
mmuiretrop12355	1	0	0	0	0	7
mmu_retrom31111	1	4	3	0	0	3
mmu_retrom29882	6	3	1	0	1	4
mmuiretrom27611	0	0	0	0	0	0
mmu_retrop19487	0	0	0	0	0	0
mmu_retrom20968	25	9	6	6	1	1258
mmu_retrop06831	87	21	18	15	24	532
mmu_retrop06836	30	29	14	2	14	55
mmu_retrom34934	0	0	1	0	0	0
mmu_retrop06835	0	0	0	0	0	0
mmuiretrop14624	1	1	0	0	0	7
mmuiretrom11168	0	0	0	0	0	0
mmu_retrom09523	265	58	44	29	46	414
mmu_retrop20258	13	0	0	1	2	3
mmu_retrom20292	0	0	0	0	0	0
mmu_retrop13439	1	1	0	4	0	4
mmu_retrop34279	0	0	0	0	0	0
mmu_retrop31182	0	0	0	0	0	0
mmu_retrom27159	0	0	0	0	0	0
mmu_retrom27158	0	0	0	0	1	3
mmu_retrom29022	3	0	0	0	1	9
mmu_retrom22436	1	0	0	0	0	0
mmu_retrom16837	497	380	203	73	129	345
mmu_retrom22433	0	0	0	0	1	6
mmu_retrom36990	9	5	2	2	0	188
mmu_retrom14454	21	0	0	0	0	0
mmu_retrom32040	1	1	0	0	0	0
mmu_retrom32194	0	0	0	0	0	5
mmu_retrom29113	0	0	1	0	0	6
mmu_retrom13243	1	1	0	0	1	5
mmuiretrop05575	4	12	9	6	6	3
mmu_retrom28424	3	2	1	3	0	12
mmu_retrom26665	0	0	0	0	0	8
mmu_retrop31574	9	5	2	3	8	27
mmuiretrop16921	0	0	0	0	0	8
mmu_retrom28421	74	17	8	30	0	36
mmuiretrom12626	1991	382	2368	808	5886	2354
mmu_retrop12008	0	0	0	0	0	24
mmu_retrom28380	0	0	0	0	0	2
mmu_retrom07741	0	3	0	2	0	4
mmu_retrom07742	14	7	4	6	4	38
mmu_retrop15901	53	35	16	15	13	47
mmu_retrom06614	4	6	1	1	0	13
mmu_retrom31304	0	0	0	0	0	0
mmuiretrop14725	1	0	0	1	1	3
mmu_retrop39494	0	0	0	0	0	0
mmuiretrom27509	1	2	3	0	0	5
mmu_retrop34877	2	0	2	0	1	0
mmu_retrom05523	3	1	1	1	0	683
mmu_retrop34875	35	21	7	1	2	61
mmu_retrop39491	1	1	2	1	0	3
mmu_retrop38147	7	0	2	2	2	5
mmu_retrom33008	4	8	2	2	2	3
mmu_retrom10197	4	3	1	7	9	36
mmu_retrop12041	0	0	0	0	0	0
mmu_retrop39499	0	0	0	0	0	2
mmuiretrop16887	1	0	1	2	0	3
mmu_retrom30753	7	0	2	0	0	8
mmu_retrom23259	0	1	1	1	0	1
mmu_retrom15907	1	0	2	1	0	2
mmu_retrom32551	0	6	1	0	1	1
mmu_retrom21139	0	1	0	0	0	1
mmuiretrom28214	3	4	0	2	0	2
mmu_retrop37430	116	22	33	35	69	91
mmu_retrom07286	0	1	0	1	0	0
mmu_retrop16069	6	5	0	1	7	21
mmu_retrom37002	1	0	0	0	0	4
mmu_retrop13680	0	0	6	0	1	4
mmu_retrop13686	1979	690	264	239	203	932
mmu_retrom37006	8	4	2	0	2	17
mmu_retrop13684	4	5	0	1	3	2
mmu_retrop31372	0	0	0	0	0	0
mmu_retrom05428	1	0	2	1	0	2
mmu_retrom26260	4	1	0	0	0	2
mmu_retrom29067	1	0	0	0	0	0
mmu_retrom05423	8	4	1	0	0	41
mmu_retrom17577	0	0	0	1	0	2
mmu_retrom17574	0	0	0	0	0	0
mmu_retrom33934	0	0	0	0	0	11
mmu_retrom17570	1	1	0	0	0	44
mmuiretrom25993	1	0	0	0	0	3
mmu_retrom21006	0	0	1	0	0	0
mmu_retrop34909	6	4	2	1	5	1
mmuiretrop26168	0	0	0	0	0	0
mmu_retrom06760	3	1	0	1	0	2
mmu_retrop22926	95	37	33	71	87	146
mmu_retrop06538	13	7	2	1	1	6
mmu_retrop34903	0	0	0	0	0	1
mmu_retrop34901	2	1	1	1	1	0
mmu_retrom23123	1	1	0	0	0	0
mmu_retrom35182	3	1	0	1	1	2
mmu_retrop24751	0	0	0	0	0	0
mmu_retrom13084	0	1	0	0	0	0
mmu_retrom13085	0	0	0	0	0	0
mmu_retrop33463	0	0	0	0	3	0
mmuiretrop31407	1	0	0	0	0	0
mmu_retrop24553	0	0	0	0	0	0
mmu_retrom31192	0	1	0	1	0	4
mmu_retrom21028	1	0	0	0	1	0
mmu_retrom16292	2	1	0	1	0	5
mmu_retrom29241	8	1	0	0	1	42
mmu_retrop09379	1	1	0	8	0	0
mmu_retrop35650	0	0	0	1	0	0
mmu_retrop16113	0	0	0	0	0	2
mmuiretrop21301	6	0	0	0	0	0
mmuiretrop07685	0	2	0	0	0	1
mmu_retrop39007	2	0	0	0	0	4
mmu_retrom12042	146	146	40	47	39	67
mmu_retrom21206	0	0	0	0	1	1
mmu_retrop39003	0	0	0	1	0	42
mmuiretrop15137	0	0	0	0	0	2
mmu_retrom36663	1	2	0	1	1	10
mmu_retrop25643	0	0	0	0	0	4
mmuiretrom37610	0	0	0	1	0	8
mmu_retrop27095	2	1	0	0	0	4
mmuiretrop15257	1	5	0	0	0	2
mmu_retrom05736	0	0	0	1	0	0
mmu_retrom26444	14	10	1	1	1	7
mmuiretrop39414	7	2	0	1	0	0
mmu_retrom28824	4	2	0	0	4	6
mmu_retrom20616	18	18	2	2	2	31
mmu_retrop09771	0	0	0	0	0	0
mmuiretrom17125	0	0	0	0	0	0
mmu_retrom33739	1	0	0	0	0	2
mmuiretrom17123	1	2	5	0	0	10
mmu_retrop13754	0	0	0	0	1	0
mmu_retrop28255	0	2	0	2	0	4
mmu_retrom25920	0	0	0	0	0	0
mmu_retrom14878	58	21	16	16	63	2768
mmu_retrop16469	1	1	0	0	0	0
mmu_retrop26942	3	2	3	4	1	0
mmu_retrop07007	0	0	0	0	0	6
mmu_retrom35696	0	0	0	0	0	0
mmu_retrom38292	0	0	0	0	0	0
mmu_retrop27140	1	4	0	0	0	8
mmu_retrop27410	1	1	0	0	0	2
mmu_retrom14874	0	0	0	0	0	0
mmu_retrom31652	0	1	0	0	0	1
mmu_retrop07737	18	7	3	0	0	45
mmu_retrom14720	0	0	0	1	0	8
mmu_retrop07735	4	7	2	2	1	3
mmu_retrop29932	11	17	2	6	1	21
mmuiretrop28770	3	0	0	0	0	1
mmu_retrom15181	3	0	0	0	1	5
mmu_retrom24131	0	0	0	0	0	89
mmuiretrop20544	0	10	0	0	1	0
mmu_retrom36356	0	0	0	1	0	0
mmu_retrom21471	0	0	0	0	0	0
mmu_retrom16580	0	0	0	0	0	0
mmu_retrop37749	122	24	4	5	0	21
mmuiretrop20542	356	136	148	147	224	654
mmu_retrom32697	13	6	9	0	8	7
mmu_retrop23739	0	0	2	0	0	23
mmu_retrom08927	0	0	0	0	0	0
mmu_retrop25339	6	1	1	1	1	1
mmu_retrom32868	3	11	0	5	6	9
mmuiretrop26916	0	0	0	0	0	0
mmu_retrom37221	0	0	0	0	0	2
mmu_retrom05882	4	3	0	1	1	9
mmu_retrop22666	17	5	3	7	2	52
mmuiretrop32967	1	0	0	1	0	1
mmu_retrom22731	0	2	0	1	0	0
mmu_retrom38909	2	0	1	2	1	4
mmu_retrom33025	0	0	1	1	1	1
mmu_retrom15116	4	0	0	0	0	9
mmu_retrom11809	1	0	1	1	4	8770
mmu_retrom22733	0	0	0	0	0	0
mmu_retrom32048	4	20	1	0	0	1077
mmu_retrop28491	3	3	0	0	0	0
mmu_retrop06739	3	0	0	0	0	1
mmu_retrom11801	11	8	1	0	0	6
mmu_retrop07640	3	0	0	2	1	8
mmu_retrop03910	4	0	0	1	0	0
mmu_retrop22735	7	1	2	1	4	4
mmu_retrom33206	14	2	1	0	0	65
mmuiretrop08936	1	0	6	0	1	8
mmu_retrop22399	8	9	8	6	11	27
mmu_retrom31774	1	1	0	0	1	84
mmu_retrop09203	0	0	0	0	0	1
mmu_retrop29854	0	0	0	0	0	0
mmu_retrom26053	0	0	0	0	0	5
mmu_retrom23521	1	0	0	0	0	2
mmu_retrom12135	0	2	0	0	0	14
mmu_retrom32280	8	18	4	4	6	9
mmu_retrom15588	3	1	0	0	0	1
mmuiretrom22252	3	1	5	3	6	6
mmu_retrop35697	2	2	0	1	0	8
mmu_retrom38839	0	0	0	0	0	9
mmu_retrop05390	8	5	2	2	4	7
mmu_retrom37695	20	6	115	29	44	59
mmu_retrom37356	0	0	0	0	0	1
mmu_retrom26125	1	0	1	0	0	0
mmuiretrop16478	0	0	0	0	0	0
mmu_retrop22084	0	0	1	1	0	1
mmu_retrom33119	0	0	0	0	0	4
mmu_retrom06282	8	1	5	2	6	9
mmu_retrop17196	1	0	1	0	0	0
mmu_retrom34324	1	0	0	0	0	5
mmu_retrop31232	0	0	0	0	0	8
mmu_retrom33110	0	0	0	0	0	5
mmu_retrop35562	2	1	2	3	0	2
mmuiretrom33733	0	0	0	0	0	1
mmu_retrom06978	0	1	0	0	1	1
mmuiretrop33178	1	0	0	0	0	3
mmuiretrom06161	1	0	1	0	1	1
mmu_retrom28793	0	0	0	0	0	0
mmu_retrom06970	3	0	0	1	6	36
mmu_retrom32247	0	0	0	1	3	0
mmu_retrom32246	0	0	0	0	0	0
mmuiretrom11428	0	0	1	0	0	1
mmuiretrop33073	0	0	0	0	0	0
mmu_retrop36525	2	0	0	0	0	1286
mmu_retrop09991	2	0	0	1	0	2
mmu_retrom16753	16	0	1	0	0	933
mmuiretrop09536	0	1	2	0	0	2
mmu_retrom14507	0	0	0	0	0	12
mmu_retrom27703	0	0	0	0	0	3
mmuiretrom37107	0	1	0	0	0	1
mmu_retrop26762	2	3	0	2	2	6
mmuiretrom26891	12	10	0	5	6	30
mmu_retrom13873	9	1	0	0	0	3
mmu_retrom32648	6	4	0	0	2	3
mmu_retrom13871	5	1	0	0	1	0
mmu_retrom26126	2	0	1	0	0	0
mmu_retrop05648	1	2	0	0	1	1
mmu_retrom36174	0	0	0	0	0	1
mmu_retrom28756	0	1	1	0	1	118
mmuiretrop35665	0	0	0	0	0	5
mmu_retrop17994	1	1	0	0	0	0
mmu_retrom06516	0	0	0	0	0	5
mmu_retrop18507	0	2	0	0	0	4
mmu_retrop25498	17	15	34	19	31	32
mmu_retrom21498	0	0	3	0	0	3
mmu_retrop18502	0	0	0	0	0	0
mmuiretrop07859	0	0	0	0	0	0
mmu_retrom32541	0	1	1	0	0	4
mmu_retrop16718	11	0	2	1	3	8
mmuiretrom17487	0	0	0	0	0	1
mmu_retrom05467	1	0	0	2	1	37019
mmu_retrop13721	607	177	125	91	149	1161
mmu_retrop18274	6	6	2	2	5	1
mmu_retrop19678	1	1	4	0	17	15
mmu_retrop08008	1	4	0	0	1	10
mmu_retrom23392	0	0	0	0	0	1
mmuiretrop33819	0	0	0	0	0	8
mmuiretrop08757	13	1	0	1	0	0
mmu_retrom15131	1	1	0	2	2	0
mmuiretrop33815	0	0	0	1	0	0
mmu_retrom10970	0	1	4	4	4	3
mmu_retrop19278	0	0	0	0	0	0
mmuiretrom11556	6	2	3	0	9	13
mmu_retrop08400	3	8	1	0	0	2
mmu_retrom34652	0	0	0	0	0	4
mmuiretrom36099	0	0	0	0	0	1
mmuiretrop21792	0	0	0	0	0	0
mmu_retrom07534	0	0	0	0	0	0
mmu_retrop40009	17	19	6	5	24	22
mmuiretrop22343	7	5	7	3	1	82
mmu_retrom13983	1	0	1	0	0	4
mmuiretrom32645	1	2	0	0	0	1
mmu_retrom32448	1	0	0	1	0	5
mmu_retrop17535	24	9	8	6	4	26
mmu_retrop33110	0	0	0	0	0	4
mmu_retrop33113	1	1	0	0	0	8
mmu_retrop16826	1	0	0	0	0	0
mmuiretrom19979	1	0	0	0	1	0
mmu_retrom08735	1	2	1	0	0	8
mmu_retrom08737	0	0	0	0	0	0
mmu_retrom34658	1	3	2	4	4	1
mmuiretrom19971	0	0	0	0	0	16
mmu_retrom07825	4	4	1	0	3	0
mmu_retrom20298	1	2	0	0	0	103
mmu_retrom34790	4	7	0	0	0	1
mmu_retrop24616	1	1	1	0	0	0
mmuiretrop19365	0	0	0	0	0	6
mmu_retrom23087	0	1	0	0	0	0
mmu_retrom23086	5	0	1	0	0	0
mmu_retrom23598	382	164	110	0	0	29
mmu_retrop24610	0	0	0	0	0	0
mmu_retrom27099	0	0	0	0	6	0
mmu_retrom30797	0	0	0	1	0	1
mmu_retrom36501	0	0	0	0	0	0
mmu_retrop30010	1	0	0	0	0	18
mmuiretrom15983	70	19	27	10	39	108
mmu_retrop10182	40	13	4	10	32	111
mmu_retrop05415	3	0	2	0	0	5
mmu_retrom30286	0	0	0	0	0	0
mmu_retrop25239	8	2	2	1	1	2
mmu_retrom15223	0	0	0	0	0	0
mmu_retrop27580	0	0	0	0	0	0
mmu_retrom09732	4	2	1	0	0	2
mmu_retrom31206	0	0	0	0	0	0
mmu_retrop30816	0	0	0	0	0	1
mmu_retrom16931	0	0	0	0	1	4
mmu_retrop35848	0	0	0	0	0	0
mmu_retrom31203	1	0	0	0	0	46
mmu_retrom22730	2	0	0	0	0	1
mmuiretrop10546	2	0	0	0	0	2573
mmu_retrop30038	5	2	0	0	4	7
mmu_retrom08601	86	42	4	16	4	34
mmu_retrop19474	2	1	1	3	4	2
mmuiretrop27607	0	0	0	0	0	3
mmu_retrop34006	1	1	0	0	0	3
mmu_retrom37693	0	0	0	0	0	1
mmu_retrop18471	31	14	9	7	16	21
mmu_retrop18470	177	133	37	32	55	186
mmu_retrop18473	0	0	0	0	0	0
mmu_retrop18472	9	5	1	1	0	2
mmuiretrop17010	0	1	0	0	0	0
mmu_retrop39794	0	0	0	0	0	1
mmu_retrop35209	2	0	0	0	0	0
mmu_retrop08051	2	1	0	0	0	18
mmu_retrop24503	22	6	16	30	24	350
mmu_retrom10625	0	0	0	0	0	1
mmuiretrop38684	0	0	1	0	0	3
mmu_retrom17612	1	0	0	0	0	2
mmuiretrom34708	0	1	0	0	0	3
mmu_retrop35201	0	0	0	0	0	2
mmu_retrop25241	0	0	0	0	0	0
mmu_retrop06922	0	0	0	0	0	1
mmu_retrop32957	238	50	4	53	11	32
mmu_retrop16879	3	2	1	1	3	2
mmu_retrom35370	0	0	0	0	0	0
mmuiretrom27123	3	0	0	0	1	1
mmuiretrom09219	0	0	0	0	1	1
mmu_retrom25961	0	0	0	0	1	3
mmu_retrop24404	1	1	0	0	0	2
mmu_retrom14069	0	0	0	0	0	0
mmu_retrom34928	0	2	1	0	0	2
mmu_retrom16672	0	0	0	0	0	467
mmu_retrop38023	0	0	0	0	0	23
mmuiretrop14656	0	2	0	1	0	8
mmu_retrom31347	1	5	0	0	0	237
mmuiretrop20200	8	8	11	3	2	15
mmu_retrop38028	0	0	0	0	0	2
mmu_retrom35326	0	0	0	1	0	5
mmuiretrop14659	0	0	0	0	0	0
mmuiretrop30941	4	5	1	0	0	0
mmu_retrom35323	1	0	2	0	0	10
mmuiretrop37155	8	0	3	0	2	4
mmu_retrop25443	3	0	2	0	2	1
mmuiretrom08635	144	64	49	24	43	206
mmu_retrom27419	0	0	0	0	0	1
mmu_retrom37965	1	1	0	0	0	3
mmu_retrom25896	0	0	0	0	0	0
mmu_retrom21197	0	0	0	0	0	2
mmu_retrom09794	0	1	0	0	0	2
mmu_retrom37968	0	0	0	0	0	0
mmu_retrom27141	0	0	0	4	0	35
mmuiretrop37793	1	0	0	0	0	7
mmu_retrom16806	0	3	0	0	0	1
mmu_retrop16582	0	0	0	0	0	15
mmu_retrop31292	1	0	1	0	0	1
mmu_retrop30395	0	0	0	0	1	0
mmu_retrom13274	1	1	0	0	1	3
mmu_retrom09062	6	0	0	0	0	0
mmu_retrop36640	3	0	0	1	0	6
mmu_retrop36641	23	8	4	88	183	12
mmuiretrom21810	31	14	17	10	20	41
mmu_retrop35512	5	5	0	0	0	6
mmu_retrom07776	0	0	0	0	0	5
mmu_retrop30767	0	0	0	0	0	4
mmu_retrop28454	18	0	1	5	0	0
mmu_retrop37633	0	0	0	0	0	0
mmu_retrop30764	0	0	0	0	0	16
mmu_retrom06606	5	1	0	0	0	45
mmu_retrop30760	58	12	10	12	2	199
mmu_retrom33840	0	0	0	0	0	0
mmuiretrom31045	0	0	0	1	0	4
mmu_retrop34862	5	2	0	0	0	3
mmuiretrop15675	0	0	0	0	2	1
mmu_retrom33844	3	1	0	0	0	5
mmu_retrom35061	51	3	5	5	17	23
mmuiretrom31043	0	0	0	0	0	1
mmu_retrom11698	2	0	0	0	0	0
mmuiretrop29610	1	0	0	0	0	3
mmu_retrom23261	13	8	0	0	0	4
mmu_retrop30787	0	0	0	0	0	16
mmu_retrop07849	8	1	0	0	0	2
mmu_retrom09391	0	0	0	0	0	18
mmu_retrop23557	3	1	0	0	0	765
mmu_retrop26663	0	0	0	0	0	0
mmu_retrom09397	5	2	0	0	0	6
mmu_retrom23066	1	0	0	0	0	0
mmuiretrop37576	2	2	0	2	0	12
mmu_retrom38026	0	1	0	0	0	4
mmu_retrom07489	7	2	1	2	2	10
mmu_retrom36365	0	0	0	0	1	20
mmu_retrop03801	2	6	4	0	2	18
mmu_retrom11001	0	0	0	0	0	2
mmu_retrop36420	0	0	0	0	0	0
mmu_retrom37039	1	0	1	0	0	0
mmu_retrom16116	0	0	0	1	0	1
mmu_retrop13697	3	2	1	1	3	14
mmu_retrom17509	0	0	0	1	0	0
mmu_retrom34272	135	47	56	52	142	230
mmu_retrop39179	3	2	0	1	0	8
mmu_retrop31365	0	0	0	0	1	0
mmu_retrom08300	5	2	0	0	1	3
mmu_retrop39175	0	0	0	0	0	1
mmu_retrop15804	0	3	0	1	0	1
mmu_retrom31900	0	0	0	0	0	0
mmu_retrop12100	3	2	0	0	1	10
mmu_retrom11769	5	2	4	0	1	9
mmu_retrop12106	7	5	6	7	4	7
mmu_retrom30348	1	0	0	0	0	1
mmu_retrop27316	0	0	0	0	0	2
mmu_retrop27717	0	0	0	0	0	0
mmu_retrop23568	0	0	0	0	0	0
mmu_retrop04491	2	1	0	1	0	6
mmu_retrom11763	11	7	3	2	16	34
mmu_retrop07251	0	0	0	0	0	0
mmuiretrom24241	0	0	0	0	0	0
mmu_retrom09269	1	4	0	5	8	1
mmu_retrom14089	7	0	2	3	13	2
mmu_retrop29980	3	1	2	0	0	2
mmu_retrom38113	13	3	0	5	1	1
mmu_retrom25709	147	49	33	22	32	27740
mmu_retrop04296	0	1	0	0	0	4
mmu_retrom36985	0	0	0	0	0	530
mmuiretrom25319	0	0	0	0	0	6
mmu_retrop29983	0	1	0	0	0	1
mmu_retrop29009	0	0	0	0	0	0
mmu_retrom24388	0	1	0	0	0	2
mmu_retrom25964	0	0	0	0	0	1
mmuiretrom31864	20	28	0	0	3	37
mmu_retrop29982	1	1	0	0	2	3
mmu_retrop09346	58	17	44	74	15	2908
mmu_retrop09348	17	2	3	6	2	11
mmu_retrop16125	5	5	0	1	1	30
mmuiretrop12545	6	1	1	0	3	0
mmu_retrop27084	3	0	0	1	0	0
mmu_retrom03815	77	42	7	23	15	187
mmu_retrom07860	2	0	2	3	1	6
mmu_retrom37109	7	1	1	4	0	15
mmu_retrom20607	2	0	0	0	0	7
mmuiretrom20232	1	0	0	0	0	1
mmuiretrop39421	10	3	0	0	0	0
mmu_retrom34384	1	0	0	0	0	1
mmu_retrom07399	0	1	0	1	0	7
mmu_retrop09744	7	0	3	0	0	2
mmuiretrom29442	0	0	0	0	0	0
mmu_retrop38788	7	2	1	2	3	4
mmu_retrop35739	0	0	1	0	0	1
mmu_retrop09742	41	2	1	11	5	33
mmu_retrom28679	3	0	0	2	0	5
mmu_retrom35446	4	0	0	4	1	5
mmuiretrop08799	2	0	1	1	1	5
mmu_retrop27191	0	0	0	0	0	5
mmu_retrop26971	0	1	1	2	0	2
mmu_retrop27159	10	0	0	0	0	1
mmuiretrom20493	79	45	5	0	4	6
mmu_retrop16059	0	0	0	0	1	2
mmu_retrop16058	3	17	1	0	0	1
mmu_retrom14609	21	3	8	5	1	9
mmu_retrom13182	0	0	0	0	0	0
mmu_retrop16057	1	0	4	1	0	19525
mmu_retrom12082	0	0	0	0	0	2
mmu_retrop16053	1	1	0	0	0	0
mmu_retrom35890	1	0	1	0	0	25
mmuiretrop11966	8	2	4	4	1	7
mmu_retrop22655	0	0	1	0	0	0
mmu_retrom30240	0	0	0	0	0	1
mmu_retrom11905	0	5	0	4	1	3
mmu_retrop23708	0	0	0	0	0	1
mmu_retrom10035	2	1	3	1	3	7
mmu_retrom11908	0	0	0	0	0	5
mmu_retrop07749	582	26	135	37	1275	1683
mmu_retrop32020	1	0	0	0	0	1
mmu_retrop20284	1	0	1	0	2	4
mmu_retrom36344	6	4	1	2	5	12
mmu_retrom36345	1	0	0	0	0	2
mmuiretrom16130	1	0	0	0	0	2
mmu_retrom06361	32	1	8	4	1	752
mmuiretrop26901	2	0	0	0	0	4
mmu_retrom15259	0	2	1	2	4	5
mmuiretrop20578	0	1	0	0	0	0
mmu_retrom05895	3	1	0	1	0	5
mmu_retrom38243	0	0	0	1	0	4
mmu_retrom32210	0	0	0	0	0	4
mmu_retrop08909	5	2	2	0	3	52
mmu_retrop34979	0	0	0	0	1	4
mmuiretrop11569	1	2	0	0	0	2
mmu_retrom06163	0	0	0	3	0	1
mmuiretrom17256	1	0	2	0	4	3
mmu_retrop33652	0	0	0	0	0	1
mmu_retrom23742	0	0	0	0	0	0
mmu_retrom16338	2	0	0	0	0	0
mmu_retrop06722	0	0	0	0	0	2
mmu_retrop08905	0	0	0	0	0	0
mmu_retrom06168	0	0	0	0	0	0
mmu_retrom17323	3	1	1	0	0	4
mmu_retrom26548	1	1	0	1	0	1
mmu_retrom30012	2	1	1	5	0	6
mmu_retrop38940	87	28	23	37	67	134
mmu_retrop38491	4	4	6	1	2	6
mmu_retrop22893	0	0	0	0	0	1
mmuiretrop22323	54	25	8	61	83	19
mmu_retrop22724	0	0	0	0	0	0
mmu_retrop22897	0	0	3	1	0	4
mmuiretrop11362	55	46	25	4	13	16
mmu_retrop07106	2	2	4	0	2	3
mmu_retrop16370	0	0	0	0	0	33
mmu_retrop13657	1	0	0	0	1	0
mmu_retrop22474	0	0	0	0	0	0
mmu_retrop04471	2	0	4	1	0	9
mmu_retrop32183	0	3	1	2	0	4
mmuiretrop29885	0	0	0	0	0	1
mmu_retrop04475	3	1	1	1	0	3
mmu_retrop08341	0	0	1	0	0	13
mmu_retrop29844	1	0	0	0	0	2
mmu_retrom07169	20	7	3	6	10	26
mmu_retrom26041	0	0	0	0	23	2
mmu_retrop29840	661	216	169	223	570	1189
mmu_retrop32128	1	0	2	0	1	0
mmuiretrop22320	71	16	122	59	180	445
mmu_retrom26048	0	0	0	1	1	1
mmu_retrop27971	2	0	0	0	1	0
mmu_retrop30765	0	0	1	0	1	0
mmu_retrop27974	0	0	0	0	0	0
mmu_retrom12129	1	0	1	1	0	2
mmu_retrop33320	0	0	0	0	0	4
mmuiretrom33121	0	0	0	0	0	0
mmu_retrop39941	0	0	0	0	1	0
mmu_retrom38803	0	0	0	0	0	0
mmu_retrom16244	27	19	9	11	16	8
mmu_retrom32472	1	1	0	1	0	1
mmu_retrom38807	0	0	0	0	0	0
mmu_retrop22092	0	0	0	0	0	2
mmu_retrop06619	1	0	1	0	0	3
mmuiretrop29349	0	0	0	0	0	252
mmu_retrom20861	7	0	4	7	4	407
mmu_retrom34310	0	0	0	0	0	0
mmu_retrop29814	0	0	0	0	0	0
mmu_retrom17034	2	9	0	1	2	8
mmu_retrom34315	0	0	0	0	0	0
mmuiretrop26601	0	0	0	0	0	4
mmu_retrop32983	0	0	0	0	0	0
mmu_retrop33699	0	0	0	0	0	35
mmu_retrom35065	0	1	0	0	0	1
mmu_retrop33693	0	0	0	0	0	0
mmu_retrop07811	1	0	0	0	0	5
mmu_retrom06942	218	85	111	89	115	459
mmu_retrop16905	1	1	1	1	1	0
mmu_retrom32258	0	0	0	0	1	1
mmu_retrom22624	0	0	0	0	1	0
mmu_retrom35411	0	0	0	0	0	2
mmu_retrom36768	8	10	1	2	5	241
mmu_retrom16741	0	0	0	0	0	2
mmu_retrom36004	1	0	1	0	0	2
mmu_retrom36762	1	2	0	0	0	1
mmu_retrom23269	0	0	0	0	0	0
mmu_retrom16748	13	0	0	0	0	106
mmu_retrom36761	10	12	0	1	7	11
mmu_retrop24303	4	2	1	2	0	4
mmu_retrom36764	0	0	1	3	0	1
mmu_retrop27627	0	0	0	0	0	0
mmuiretrop18778	3	0	2	3	5	3
mmuiretrop17027	3	1	2	0	0	3
mmu_retrop18284	0	0	0	0	1	6
mmu_retrom37889	0	0	0	0	0	0
mmuiretrop07844	1	1	0	0	0	21
mmu_retrom17728	3	1	1	3	0	10
mmu_retrom13868	3	0	0	1	0	5
mmu_retrop11879	2	0	0	0	0	1
mmu_retrom34401	7	0	0	0	0	4
mmu_retrop18515	1	2	0	1	1	0
mmu_retrop12595	20	6	15	11	7	109
mmu_retrom06385	1	0	0	0	0	1
mmu_retrom06380	0	1	0	0	0	33
mmuiretrop18510	2	0	0	0	0	1
mmu_retrom34279	5	0	0	1	2	4
mmu_retrop19643	1	0	0	1	0	65
mmu_retrom14562	9	4	3	0	16	14
mmu_retrop24280	0	0	0	0	0	0
mmu_retrop19647	2	2	1	0	2	82
mmu_retrop08028	1	4	0	0	0	0
mmu_retrop24289	0	0	0	0	0	0
mmu_retrop14297	1	0	1	0	4	2
mmuiretrop24045	6	3	1	0	2	15
mmu_retrop24445	0	0	0	0	0	0
mmuiretrom10172	0	0	0	0	0	0
mmu_retrop07923	3	3	1	0	0	1
mmu_retrop24442	57	29	16	23	10	91
mmu_retrom16638	0	0	0	0	0	0
mmuiretrom07707	10	14	1	0	0	3
mmu_retrop32855	8	0	0	2	0	1
mmu_retrom16635	9	1	2	1	5	22
mmu_retrom15515	0	0	0	0	0	2
mmu_retrom16633	42	8	14	14	940	43
mmu_retrom10963	2	1	0	1	1	5
mmu_retrop40012	0	0	0	0	0	6
mmu_retrom23306	0	0	0	0	0	0
mmuiretrom05935	15	3	11	1	12	22
mmu_retrop10336	6	0	0	0	0	0
mmu_retrom22639	1	0	0	0	0	301
mmu_retrop09836	1	2	0	0	0	18
mmu_retrop40019	1	0	0	1	0	0
mmu_retrom24812	0	0	0	0	0	0
mmu_retrop08750	0	0	0	0	1	0
mmu_retrom31600	1	0	0	0	0	1
mmu_retrop33108	0	0	0	0	0	1
mmuiretrom22545	0	0	0	0	0	72
mmu_retrom32091	0	0	0	0	0	14
mmu_retrom32093	0	0	0	0	0	1
mmu_retrop31661	0	3	0	0	0	8
mmu_retrom34651	24	13	14	18	20	17
mmu_retrop33100	1	1	0	0	0	2
mmu_retrop24847	2	0	0	0	0	0
mmu_retrom23960	0	0	0	0	1	1
mmu_retrop33105	0	0	0	0	1	1
mmu_retrop35980	0	0	0	0	0	0
mmu_retrom20280	2	4	8	2	4	8
mmu_retrom26953	30	3	1	0	0	159
mmu_retrop17254	0	0	0	0	0	0
mmu_retrop35985	14	4	1	3	2	13
mmu_retrop35266	0	0	0	0	1	368
mmu_retrom26957	3	5	0	0	0	6
mmu_retrom17693	0	0	0	0	0	0
mmu_retrop35989	7	2	3	1	2	1
mmu_retrom20288	1	0	0	0	0	52
mmu_retrom17697	0	0	0	0	0	0
mmu_retrop30159	13	11	3	3	2	28
mmu_retrom17695	2	1	0	0	0	0
mmuiretrom14074	0	0	0	0	0	0
mmu_retrom35070	9	0	14	2	4	15
mmu_retrom23091	3	1	1	0	2	0
mmu_retrop05406	1	2	0	3	1	20
mmu_retrop05401	2	3	0	0	6	22
mmu_retrom35200	2	0	0	0	0	1
mmu_retrop35853	2	0	0	0	1	9
mmu_retrom35203	1	0	0	0	0	0
mmuiretrop10396	17	3	4	4	5	29
mmu_retrom35205	0	0	0	0	0	35
mmuiretrom23545	0	0	0	0	0	0
mmu_retrom09720	0	0	0	0	0	0
mmu_retrom35209	0	1	0	0	0	0
mmuiretrop05208	2	0	0	0	0	5
mmu_retrom09723	2	4	1194	2	0	32
mmu_retrop24753	0	0	0	0	0	0
mmu_retrom09725	65	16	14	6	35	92
mmu_retrop15983	1	2	0	0	0	0
mmu_retrom03623	12	5	1	2	1	6
mmuiretrop32241	21	18	4	13	0	17
mmu_retrop34078	0	0	0	1	1	1
mmu_retrom26521	0	0	0	0	1	0
mmu_retrom37681	70	29	28	23	7	128
mmu_retrom07942	0	0	0	0	0	6
mmu_retrom35208	0	0	0	0	0	3
mmu_retrop34071	1	0	3	1	1	1
mmu_retrop34070	5	5	2	1	1	11
mmu_retrop14765	0	0	0	0	0	0
mmu_retrop18464	0	0	0	0	0	7
mmu_retrop30371	735	278	93	53	55	205
mmuiretrom18749	55	40	15	33	30	95
mmu_retrop37910	0	0	0	0	0	6
mmu_retrom06563	7	3	6	5	7	23
mmu_retrom26964	106	0	0	12	0	3
mmuiretrom24893	2	7	0	0	3	5
mmu_retrop12377	2	0	2	2	1	2
mmu_retrom34955	52	6	6	2	3	8
mmu_retrop39543	4	2	0	0	1	208
mmu_retrom22939	2	1	1	0	0	0
mmu_retrom37804	3	0	0	0	0	12
mmu_retrop08590	4	2	2	3	2	6
mmu_retrom25959	0	0	0	1	0	0
mmu_retrop14962	1	1	4	0	0	2
mmu_retrom31351	10	3	2	0	0	2
mmuiretrom13484	13	4	10	7	6	134
mmu_retrom36402	0	0	0	0	0	0
mmu_retrop24267	1	1	0	2	0	0
mmuiretrop24224	3	1	2	1	0	2
mmuiretrop08741	1	2	0	0	0	1
mmu_retrom16816	0	0	0	1	1	0
mmu_retrop34296	5	2	4	5	7	8
mmuiretrom08194	1	0	0	0	2	1
mmu_retrom09650	18	11	0	1	1	643
mmu_retrop33183	4	3	0	1	2	3
mmu_retrom37978	0	0	0	0	0	0
mmu_retrom32069	6	5	5	1	2	72
mmu_retrop10047	0	0	0	0	0	8
mmuiretrop30257	0	0	0	0	0	0
mmu_retrom08251	0	0	0	0	0	15
mmu_retrom32068	0	1	1	1	1	8
mmu_retrom26608	2	7	1	2	1	15
mmu_retrop37256	3	1	2	5	2	535
mmu_retrop36639	6	1	3	1	5	15
mmu_retrom38455	0	0	0	0	0	0
mmuiretrom32102	0	1	0	0	0	1
mmu_retrom07769	31	29	51	35	20	310
mmuiretrop38783	30	12	2	6	0	21
mmu_retrom26601	0	0	0	0	0	0
mmu_retrom26603	0	0	0	0	0	0
mmu_retrop30576	0	0	0	0	0	44
mmu_retrom07763	3	0	0	0	0	2182
mmu_retrop20298	3	0	1	0	0	2
mmuiretrop26594	4	2	0	0	0	1
mmu_retrop15963	0	0	0	0	0	0
mmu_retrop13286	11	8	3	3	9	19
mmu_retrop37252	0	0	0	0	0	1
mmu_retrop34857	35	7	0	2	0	35
mmu_retrop35508	3	2	1	3	0	9
mmu_retrom33870	10	5	0	2	0	21
mmu_retrom11680	0	0	0	1	0	2
mmu_retrom35051	1	0	0	1	0	16
mmu_retrom25823	234	94	139	72	234	490
mmu_retrom21397	1	4	2	0	0	4
mmu_retrom34556	0	0	0	0	0	251
mmu_retrop33557	0	1	0	0	0	0
mmu_retrom36386	0	0	0	0	0	0
mmu_retrom34550	10	5	0	0	0	4
mmu_retrom08961	0	0	0	0	0	4
mmuiretrom09665	0	0	0	0	0	0
mmuiretrom09664	0	0	0	0	0	1
mmu_retrop18730	3	3	0	0	0	4
mmu_retrom09476	137	89	159	103	234	126
mmu_retrop17431	12	15	3	4	0	9
mmu_retrop31364	6	1	0	0	0	27
mmu_retrop35182	10	5	7	3	0	7
mmu_retrop13280	13	7	0	3	2	8
mmu_retrop08814	0	0	0	0	0	1
mmuiretrop33043	1	2	1	2	0	9
mmu_retrop27365	0	1	0	0	0	0
mmuiretrop35633	0	0	0	0	0	0
mmu_retrom38030	0	0	1	0	0	0
mmu_retrom38032	4	0	0	1	0	1
mmu_retrop34568	0	0	0	0	0	2
mmu_retrom21323	0	0	0	0	0	0
mmu_retrop31357	0	0	0	0	0	2
mmu_retrom34622	0	1	1	0	2	3
mmu_retrom38038	0	0	0	0	0	2
mmu_retrom38039	0	1	0	0	0	4
mmu_retrop31421	1	0	0	0	0	0
mmu_retrop12915	0	0	0	0	0	0
mmu_retrom17863	1	0	0	0	0	0
mmuiretrom34042	0	0	0	0	0	0
mmu_retrom29895	0	1	0	0	0	13
mmu_retrom05403	1	1	5	2	1	12
mmu_retrop31040	0	0	0	0	0	0
mmu_retrop35311	98	14	23	14	44	187
mmu_retrop28382	1	0	0	0	111	0
mmu_retrop31194	0	0	0	0	0	0
mmu_retrop39166	6	2	1	1	1	1
mmu_retrop31043	5	1	2	0	1	5
mmu_retrop39164	0	0	0	0	0	94
mmu_retrop31190	142	60	146	69	88	290
mmu_retrop12111	0	0	0	1	0	1
mmu_retrom06701	9	2	9	2	12	168
mmu_retrop12113	5	0	3	7	10	3
mmu_retrop12115	9	9	0	0	0	0
mmuiretrop39788	0	0	0	0	0	1
mmu_retrom25734	75	77	1	3	0	163
mmu_retrom11776	0	0	0	0	0	10
mmu_retrom30336	27	7	6	11	5	25
mmu_retrop27765	0	0	0	0	0	0
mmu_retrop16577	127	69	33	21	16	387
mmuiretrop23434	0	0	0	0	0	0
mmu_retrom13970	2	0	1	0	0	0
mmu_retrom14097	1	1	1	1	1	1
mmu_retrom38104	1	1	0	0	0	4
mmu_retrom38105	0	0	0	0	0	1
mmu_retrom38106	27	23	1	5	2	16
mmu_retrom09275	0	0	0	1	0	4
mmu_retrop09680	0	0	0	0	0	1
mmu_retrom04843	62	35	43	40	11	300
mmu_retrop09683	0	0	0	0	0	1
mmu_retrop16132	256	132	319	111	212	202
mmu_retrop27505	1	0	0	0	0	1
mmuiretrom31819	3	2	0	0	0	5
mmu_retrop27508	0	0	0	0	1	0
mmu_retrom03395	0	0	0	0	0	0
mmuiretrom20773	3	0	1	1	0	14
mmu_retrom38320	1	4	5	1	8	5
mmuiretrom24870	16	2	1	0	4	25
mmu_retrom38324	0	0	0	0	0	0
mmu_retrom38327	0	0	0	0	1	0
mmu_retrom38328	0	0	0	0	0	1
mmu_retrop36568	0	0	0	0	0	0
mmu_retrop13733	0	0	0	0	0	0
mmu_retrop07766	4	4	1	0	1	3
mmu_retrop23759	0	2	0	1	0	0
mmuiretrom28491	0	0	0	0	0	0
mmu_retrop38793	2	0	1	1	0	2
mmuiretrom12463	0	1	1	0	0	2
mmu_retrop38825	0	0	0	0	0	0
mmu_retrop38794	4	5	0	1	0	11
mmu_retrop27164	15	1	0	0	0	0
mmu_retrom30244	0	0	0	0	0	0
mmu_retrop28002	1	0	0	0	1	0
mmu_retrom10797	0	0	0	0	0	0
mmu_retrom15390	1	5	2	2	0	4
mmu_retrop37905	2	0	1	0	0	1
mmu_retrom14898	3	0	0	0	0	0
mmu_retrop37903	0	1	0	0	0	0
mmu_retrop34917	0	0	0	0	0	2
mmu_retrop07754	2	1	0	0	0	1
mmu_retrom15693	1	3	0	0	0	1
mmu_retrop07757	0	0	0	0	0	8
mmu_retrop22489	0	0	0	0	0	1
mmu_retrom04937	126	20	22	15	7	122
mmu_retrop28526	4	4	0	1	2	22
mmu_retrom15698	2	1	0	0	0	29
mmu_retrom36371	0	0	0	0	0	0
mmu_retrom09580	1	1	2	1	1	2
mmu_retrom23899	0	0	0	1	1	0
mmu_retrom38259	1	0	0	0	0	2
mmu_retrom38944	5	2	2	3	1	1
mmu_retrom37203	0	0	0	0	0	0
mmuiretrom17245	0	0	0	0	0	2
mmu_retrop23889	0	0	0	0	1	0
mmu_retrom38252	5	0	1	4	0	12
mmu_retrop27180	313	96	13	16	10	68
mmu_retrop28758	3	2	0	0	0	39
mmu_retrop12743	1	2	5	1	3	10
mmuiretrom13232	1	2	0	0	0	1
mmu_retrop36169	0	0	0	0	0	2
mmu_retrom34474	2	0	1	0	0	0
mmu_retrop13644	0	0	0	0	0	30
mmu_retrop22910	0	0	0	0	0	1
mmuiretrop11599	0	1	1	0	1	0
mmu_retrop38954	1	3	0	0	0	1
mmu_retrom10428	0	0	1	0	0	0
mmu_retrop07114	5	2	1	0	0	2
mmu_retrom35540	0	0	0	0	0	1
mmuiretrop29914	0	0	0	0	0	1
mmu_retrom17335	0	0	0	0	0	1
mmu_retrop38480	7	1	1	0	0	4
mmu_retrop07111	6	6	1	0	0	183
mmu_retrop27229	1	0	0	0	0	0
mmuiretrop11350	0	0	0	0	0	1
mmu_retrom11317	5	0	3	0	7	11
mmu_retrop22719	0	0	0	0	0	0
mmu_retrop23620	46	21	4	1	0	3
mmu_retrom14678	0	0	0	0	0	13
mmuiretrop20699	0	0	0	1	0	314
mmuiretrop31764	0	0	0	0	0	7
mmu_retrom31756	1	0	0	0	1	1
mmu_retrom35196	33	41	0	0	0	5
mmuiretrom37091	0	0	0	0	0	0
mmu_retrop06579	1173	223	274	240	298	967
mmu_retrop06578	1	0	0	0	0	21
mmu_retrom36086	2	3	0	3	0	10
mmu_retrop29862	850	331	227	212	232	663
mmu_retrop09229	5	1	71	7	0	272
mmuiretrom28828	0	0	0	0	0	1
mmu_retrom11567	0	0	0	0	0	1
mmu_retrop05434	2	0	0	0	2	12
mmu_retrop13346	2	1	2	4	1	2
mmu_retrom12156	2	1	1	1	0	171
mmuiretrop31411	1	1	2	1	1	1
mmu_retrom12158	1	0	0	0	0	0
mmu_retrom26907	5	2	1	3	1	11
mmu_retrop27988	0	0	0	0	0	3
mmu_retrom37377	8	6	4	0	0	167
mmuiretrop30551	0	0	0	0	0	4007
mmu_retrom16259	1	0	0	0	0	5
mmu_retrop39972	0	0	0	0	0	22
mmu_retrom16254	0	0	1	0	0	0
mmu_retrop22924	3	1	1	0	0	18
mmuiretrop35549	0	0	0	0	0	0
mmuiretrop34320	1	0	2	1	0	6
mmu_retrom32405	0	0	0	0	0	0
mmu_retrop23840	14	2	2	3	41	16
mmu_retrom20813	3	2	2	3	2	3
mmu_retrom34305	0	0	0	0	0	0
mmu_retrom34300	1	0	0	0	0	9
mmu_retrom34301	1	0	0	0	0	0
mmu_retrop09532	0	0	0	0	0	0
mmuiretrop29357	3	9	1	2	1	5
mmu_retrom22485	7	0	0	0	0	0
mmu_retrop07808	0	0	0	0	0	0
mmu_retrom30934	0	0	0	0	0	0
mmuiretrom05581	5	5	0	1	1	19
mmu_retrop33663	0	0	3	0	0	9
mmu_retrom32226	1	0	0	0	0	0
mmu_retrop25587	0	0	1	0	0	17
mmuiretrop08353	0	0	0	0	0	0
mmu_retrom22451	0	0	0	0	0	2202
mmu_retrop39995	0	1	0	0	0	2
mmu_retrom08060	0	0	0	0	0	1
mmu_retrom31934	2	3	0	0	0	2
mmuiretrop16937	7	0	0	0	0	8
mmuiretrom06988	67	12	44	41	59	1442
mmu_retrom36797	0	0	0	0	0	0
mmu_retrom23446	2	0	0	0	0	1
mmu_retrom27486	2	1	1	0	0	1
mmu_retrom36793	0	0	0	0	0	3
mmu_retrom28807	0	1	4	0	0	2
mmu_retrop13238	0	0	0	0	0	0
mmu_retrop14519	0	0	0	0	0	2
mmu_retrop26740	1	0	1	0	0	5
mmu_retrop30935	0	0	0	0	0	0
mmuiretrom33393	1	16	0	0	0	6
mmuiretrom20204	18	18	0	3	0	16
mmu_retrom26994	0	0	1	0	0	1
mmuiretrop18747	20	1	0	1	0	13
mmu_retrom15061	1	0	0	4	2	1
mmu_retrom31684	2	2	0	10	8	5
mmu_retrop37294	1	0	0	0	0	1
mmu_retrom31687	1	0	0	0	0	8
mmu_retrom21567	0	0	0	0	0	0
mmu_retrom15676	1	0	0	0	2	12
mmu_retrop37016	1	3	1	2	0	7
mmu_retrop27571	0	0	0	0	0	2
mmu_retrom15671	3	0	0	0	5	17
mmu_retrop23088	2	0	0	10	0	1
mmu_retrop18073	1006	482	518	366	856	1314
mmu_retrom32314	2	0	1	0	0	8
mmu_retrop22448	2	0	0	0	3	5
mmu_retrop22919	1	1	0	0	2	2
mmu_retrom06394	39	47	1	2	0	47
mmu_retrop22916	0	0	0	0	0	1
mmuiretrom07803	0	0	0	0	0	3
mmu_retrom26991	10	3	0	0	0	1
mmu_retrom23969	0	0	0	0	0	0
mmuiretrom20147	1	2	0	0	0	1
mmu_retrop33000	1	2	0	0	0	6
mmu_retrom22750	27	2	5	35	18	1
mmu_retrom21147	5	0	0	0	0	17
mmu_retrom15439	0	0	0	0	0	0
mmu_retrom32135	0	3	0	0	0	16
mmu_retrop24299	0	6	1	0	1	1
mmuiretrom37961	16	5	0	12	2	49
mmu_retrop17952	2	2	2	1	1	21
mmu_retrop17950	2	1	0	0	0	34
mmu_retrop08791	28	7	8	4	7	89
mmuiretrop23178	0	0	0	0	0	1
mmu_retrom26012	1	0	0	0	0	0
mmu_retrop07930	3	1	1	4	0	4
mmu_retrop33864	0	0	1	0	0	68
mmu_retrop36580	0	0	0	0	1	0
mmuiretrop33876	3	0	0	0	0	3
mmu_retrom22621	0	0	0	0	0	0
mmu_retrom08130	0	2	1	1	0	5
mmu_retrop25257	0	0	0	0	0	0
mmu_retrom08135	75	44	65	47	64	102
mmu_retrop23546	39	12	3	6	3	349
mmu_retrom14419	3	0	1	0	0	39
mmu_retrom16487	328	149	148	71	2	38
mmu_retrom22831	0	0	0	0	0	1
mmuiretrom22551	0	0	0	0	0	0
mmu_retrom32735	2	1	2	1	1	6
mmu_retrom22830	20	6	13	2	11	13
mmu_retrom26902	7	7	0	0	0	5
mmu_retrop17555	14	2	1	1	3	66
mmu_retrop17314	6	3	9	7	10	4
mmuiretrop29257	0	0	1	0	0	10
mmu_retrom23465	1	0	0	0	0	7
mmu_retrop14196	1	0	0	2	0	0
mmu_retrop32991	5	1	1	1	1	0
mmu_retrop19818	11	2	2	3	3	0
mmu_retrom07842	3	0	2	2	0	22
mmu_retrop31283	0	0	0	0	0	5
mmu_retrop23504	1	0	0	0	0	2
mmu_retrop30166	10	6	1	2	3	11
mmuiretrom06860	0	0	0	0	0	0
mmuiretrop15471	5	11	1	1	0	5
mmu_retrom07848	3	7	1	1	1	12
mmu_retrom17684	1	0	0	0	0	4
mmu_retrop36943	1	1	0	0	11	2
mmu_retrom04641	153	84	40	16	12	109
mmu_retrop31214	0	0	0	0	0	0
mmu_retrop18811	14	7	5	6	7	40
mmu_retrop18817	1	0	0	0	0	0
mmu_retrop17307	0	0	0	0	0	1
mmu_retrom08398	0	0	0	0	0	0
mmu_retrop38542	0	0	0	0	0	0
mmuiretrom05363	7	2	1	0	3	13
mmu_retrop18819	0	0	0	0	0	2
mmu_retrom23569	1	0	0	0	0	0
mmu_retrom36565	14	11	10	18	11	34
mmu_retrom35941	0	0	0	0	0	0
mmu_retrom27646	2	5	0	0	1	16
mmu_retrom09867	0	0	0	0	0	1
mmu_retrom30732	0	0	0	0	0	0
mmuiretrom35498	1	0	0	0	1	1
mmuiretrom35492	0	0	0	0	0	26
mmu_retrop40371	1	1	0	1	1	5
mmu_retrop40370	7	1	1	0	0	5
mmu_retrop04134	1	0	2	0	0	8
mmu_retrom26537	0	0	0	0	0	2
mmuiretrop24181	1	0	0	1	0	1
mmu_retrop18495	2	2	0	1	0	1
mmu_retrom27389	2	1	0	0	0	8
mmu_retrop18493	8	2	7	8	5	6
mmu_retrop10298	2	0	1	0	1	5
mmu_retrop25034	0	0	0	0	0	2
mmu_retrom27382	12	6	2	1	1	109
mmuiretrop32473	1	0	0	0	0	37
mmuiretrop18520	1	0	0	2	0	0
mmu_retrom27384	2	2	1	1	0	2
mmu_retrom16796	8	7	17	0	5	8
mmu_retrop35888	141	52	56	35	91	60
mmuiretrop30652	2	0	1	0	1	1
mmu_retrop35544	0	0	0	0	0	0
mmuiretrom30290	0	0	0	0	0	0
mmuiretrop34072	4	1	4	0	1	19
mmu_retrom25946	0	1	3	0	4	15
mmu_retrom22442	3	4	3	6	0	3
mmu_retrom25945	0	0	0	0	0	96
mmu_retrom34948	1	0	0	0	0	1
mmu_retrom25948	5	2	2	0	1	7
mmu_retrop24076	5	1	2	0	0	0
mmu_retrop38007	12	3	3	9	3	8
mmu_retrop23894	0	0	0	0	2	0
mmu_retrom05721	4	5	2	5	1	5
mmu_retrom11361	10	9	0	2	2	0
mmu_retrom36415	4	0	0	0	1	179
mmuiretrom23119	0	0	0	0	0	20
mmu_retrop35738	0	0	0	0	0	1
mmu_retrom35305	7	0	1	6	1	6
mmu_retrom37943	57	23	28	19	15	93
mmu_retrom15847	2	0	1	0	0	1
mmu_retrom09661	7	11	2	3	5	6
mmu_retrop10078	3	0	0	2	0	4
mmuiretrop37774	0	1	0	0	0	4
mmu_retrom23963	0	0	1	0	0	12
mmu_retrop34282	0	0	0	0	0	0
mmu_retrop15000	4	2	2	1	2	15
mmuiretrop33276	0	0	0	0	0	0
mmu_retrom03525	5	1	1	0	1	6
mmu_retrom20933	17	13	0	0	0	11
mmu_retrom26961	0	0	0	0	0	4
mmu_retrom28576	0	0	0	1	0	5849
mmu_retrop35080	2	3	1	1	0	1
mmu_retrom07718	0	0	0	0	0	1
mmu_retrom28599	30	20	30	34	60	22
mmu_retrop31505	0	0	0	0	0	0
mmu_retrop28127	230	34	74	17	94	465
mmu_retrop15957	0	0	0	0	0	0
mmu_retrop39680	0	0	0	0	0	88
mmu_retrop09748	0	0	0	0	0	0
mmuiretrop16926	0	0	0	0	0	8
mmu_retrop34849	3	5	1	2	1	1
mmu_retrom05578	0	0	0	0	0	0
mmu_retrom35048	0	1	0	0	0	0
mmu_retrop35268	0	0	0	0	0	1
mmu_retrom33627	6	1	0	2	2	4
mmu_retrom35043	0	0	0	0	0	8
mmu_retrom05573	0	0	0	0	0	2
mmu_retrop34845	11	6	1	5	0	69
mmu_retrom20259	0	0	0	0	0	0
mmu_retrop20194	3	0	0	0	0	0
mmu_retrom21382	0	0	0	0	0	0
mmu_retrop29461	2	0	0	0	2	19
mmu_retrom21384	0	0	0	0	0	1
mmu_retrom23281	1	0	0	0	0	0
mmu_retrom10163	0	0	0	0	0	42
mmu_retrom05588	0	1	0	0	0	21
mmu_retrop12299	0	0	0	0	0	0
mmuiretrom08476	5	2	0	0	0	27
mmu_retrom20254	0	0	0	0	2	9
mmu_retrop38179	2	0	1	0	0	0
mmuiretrom09674	0	0	0	0	0	11
mmuiretrom33774	0	0	0	0	0	254
mmu_retrop31166	0	0	3	0	0	3
mmu_retrop16456	0	1	0	0	0	7
mmu_retrom34626	5	5	4	3	2	1
mmu_retrom28553	1	2	1	0	0	9
mmu_retrom25901	0	0	0	0	0	0
mmu_retrop08784	0	0	0	0	0	7
mmu_retrop30343	0	1	0	0	1	3
mmu_retrom25639	7	2	6	1	4	8
mmu_retrop36192	2	0	0	1	0	13
mmu_retrop33152	4	1	2	0	0	12
mmu_retrom14125	21	19	10	10	26	13
mmu_retrop31434	17	21	2	1	0	14
mmu_retrom20974	4	22	2	3	0	2
mmuiretrom15616	0	0	0	1	2	0
mmu_retrop31437	0	0	0	0	0	0
mmu_retrop20172	0	0	1	0	1	7
mmu_retrom29016	0	1	0	0	0	0
mmuiretrop05630	1	0	0	2	1	14
mmuiretrop07301	131	57	25	28	31	1015
mmu_retrom17524	0	0	0	0	0	0
mmu_retrop24556	0	0	0	0	0	0
mmu_retrop36757	3	0	1	1	0	10
mmu_retrom07623	1	0	0	0	1	108
mmu_retrop12128	2	2	3	2	0	122
mmu_retrop39191	8	3	4	6	4	26
mmu_retrom05415	1	0	0	0	0	4
mmu_retrom26708	1	1	0	0	0	3
mmuiretrom31392	5	1	2	1	2	2
mmu_retrom32123	9	1	0	1	1	11
mmu_retrop35153	0	0	0	0	0	0
mmu_retrom17528	2	0	0	1	0	1463
mmu_retrop35403	2	0	2	0	3	9
mmu_retrop06943	50	19	36	46	188	73
mmuiretrop38646	1	0	0	0	0	4
mmu_retrop27779	0	0	0	0	0	0
mmuiretrop03812	4	2	2	1	0	8
mmu_retrom11783	0	0	1	0	0	1
mmu_retrom28382	0	0	0	0	0	0
mmu_retrop34931	0	1	0	0	1	25
mmu_retrom06719	10	4	3	2	1	7
mmu_retrom28858	5	0	1	1	0	0
mmu_retrom30327	2	1	0	1	0	0
mmuiretrom16995	0	1	1	1	0	0
mmuiretrop31926	0	0	0	0	0	0
mmu_retrop24462	4	3	4	2	4	7
mmu_retrom10094	0	0	0	0	0	2
mmu_retrom11541	0	0	0	0	0	5
mmu_retrom11540	1	0	1	1	0	5
mmu_retrop27157	3	1	0	0	0	9086
mmuiretrom24255	6	2	4	0	3	12
mmuiretrom20749	0	0	0	0	1	10
mmu_retrom16033	5	0	0	0	0	3
mmu_retrop16145	0	0	0	0	0	3
mmu_retrop16144	15	18	9	115	0	13
mmu_retrom14937	7	7	3	6	5	5
mmu_retrop16149	0	0	0	0	0	0
mmu_retrop23096	0	1	0	0	0	25
mmuiretrop21376	0	1	0	0	0	1
mmu_retrop38565	0	0	1	1	1	0
mmu_retrop24582	0	0	0	1	0	0
mmu_retrom34158	0	0	0	0	0	2
mmu_retrom26419	1	0	1	0	1	6
mmu_retrom28129	0	0	0	0	0	0
mmu_retrom28657	0	0	0	0	0	0
mmuiretrop32526	6	1	4	2	0	9
mmu_retrom28123	23	9	0	2	8	54
mmu_retrom28122	0	0	0	0	0	0
mmu_retrom28652	35	1	2	2	0	1
mmu_retrom30492	8	15	4	7	10	28
mmu_retrom17230	0	3	0	1	1	9
mmu_retrom17233	237	90	75	76	73	332
mmu_retrop25111	6	6	1	2	0	5
mmu_retrom17235	128	45	212	179	446	309
mmu_retrom11907	2	3	2	5	12	8
mmu_retrom17236	0	0	0	0	0	8
mmu_retrop28289	20	7	2	14	78	66
mmu_retrom17238	0	0	0	0	0	1
mmu_retrom30499	1	0	0	0	0	2
mmu_retrom28493	8	3	7	7	3	51
mmu_retrop38818	0	1	0	0	0	3
mmu_retrom10545	2	0	3	0	0	2
mmu_retrop16524	0	0	0	0	0	2
mmu_retrop29648	2	0	0	0	0	1
mmuiretrom08717	0	0	0	0	0	0
mmu_retrom10789	5	6	0	0	0	2
mmuiretrop14882	1	1	0	1	0	2
mmu_retrom08459	19	4	3	4	26	3212
mmu_retrom30958	0	1	0	0	0	1
mmu_retrop16704	0	0	0	0	0	0
mmu_retrom36369	0	0	0	0	0	1
mmu_retrom30474	2	0	2	0	0	8
mmu_retrom15689	0	0	0	1	0	26
mmu_retrop28517	0	0	0	0	0	4
mmuiretrom21183	5	0	1	0	12	0
mmu_retrop33088	3	3	3	4	7	14
mmu_retrom15441	0	0	0	0	0	2
mmu_retrom13148	0	0	0	0	0	2
mmuiretrom29751	1	0	4	0	9	26
mmu_retrop26358	2	0	0	0	0	4
mmu_retrom38263	0	0	0	0	0	0
mmu_retrop27197	0	1	0	0	0	0
mmu_retrop36377	9	5	3	9	1	27
mmu_retrom13141	0	0	0	0	0	0
mmu_retrom20979	2	0	0	0	0	14
mmuiretrom13224	2	1	2	1	0	1
mmu_retrom32872	227	116	279	159	405	453
mmu_retrop13658	0	0	0	1	0	5
mmu_retrom17308	0	0	0	0	0	0
mmu_retrom30786	0	1	0	0	0	6
mmu_retrom25680	0	0	0	0	0	0
mmuiretrom10936	0	1	0	0	0	0
mmu_retrom30783	0	0	0	0	0	465
mmu_retrom30781	2	0	0	1	1	5
mmu_retrom10436	0	0	0	0	0	1
mmuiretrop11617	1	7	2	2	1	192
mmu_retrom35554	12	4	3	2	5	1
mmu_retrop22872	2	3	0	0	0	1
mmuiretrop25463	1	1	0	0	1	1
mmu_retrom04925	0	0	0	0	0	4
mmu_retrop28600	10	4	0	0	0	9
mmuiretrop12831	1	0	0	0	1	5
mmuiretrop12830	1	0	0	0	32	3
mmu_retrom27309	0	0	3	1	2	4
mmuiretrom25766	490	66	171	73	480	867
mmu_retrop29867	1	6	6	3	2	4
mmu_retrom33094	0	2	0	2	0	2
mmuiretrom27591	0	0	0	0	0	12
mmu_retrom36095	0	0	0	0	0	101
mmuiretrom04672	0	0	0	0	0	7
mmu_retrop27994	4	0	4	2	1	11
mmu_retrom07141	0	0	0	0	0	19
mmu_retrop27990	3	1	2	0	2	4
mmu_retrom12146	0	2	0	0	0	11
mmu_retrom04928	1	0	11	1	11	16
mmuiretrom22524	68	13	34	25	64	118
mmu_retrom27662	0	1	1	0	4	2
mmu_retrop37152	5	1	3	0	1	3
mmuiretrop38320	17	16	4	8	5	1
mmu_retrom32879	3	1	1	0	2	5
mmuiretrom07081	0	1	0	0	0	0
mmu_retrom06202	52	34	13	8	6	65
mmu_retrom38869	4	1	0	0	1	0
mmu_retrom28724	0	0	0	0	0	4
mmuiretrom37407	0	0	0	0	0	0
mmuiretrom07086	0	0	0	0	0	0
mmu_retrom25745	3762	1866	1537	929	1786	9292
mmu_retrom29120	0	1	0	0	0	1
mmu_retrom34370	0	0	0	0	0	0
mmu_retrom33417	141	102	21	17	5	75
mmuiretrop24415	0	0	2	2	0	1
mmuiretrop12231	0	0	0	0	0	0
mmu_retrom33109	3	1	1	1	0	131
mmu_retrop22677	0	0	0	0	0	2
mmu_retrom11960	2	0	0	0	0	5
mmu_retrom21381	2	0	1	0	0	6
mmu_retrom11964	7	4	3	2	1	45
mmu_retrop24515	824	81	194	79	269	1034
mmu_retrop22295	19	7	14	23	16	53
mmu_retrop33676	0	0	0	0	1	6
mmu_retrop33901	0	0	0	0	0	22
mmu_retrop33906	0	0	0	0	1	0
mmuiretrop12908	41	22	32	37	30	190
mmu_retrom28584	1	3	0	0	0	0
mmuiretrom28464	1	0	0	0	0	1
mmuiretrom12088	0	0	0	0	0	1
mmu_retrom21021	3	4	5	5	25	5
mmu_retrop31274	0	0	0	1	0	0
mmu_retrom23585	8	0	1	6	2	6
mmu_retrom26159	0	0	0	0	0	0
mmu_retrom36787	3	0	0	1	4	7
mmu_retrop08251	1	0	0	2	0	18
mmu_retrop22050	15	1	0	0	0	0
mmu_retrop16478	0	0	0	0	0	0
mmu_retrom07037	0	0	0	2	2	1
mmu_retrom26153	0	0	0	0	0	0
mmu_retrom13840	1	2	1	0	2	6
mmu_retrop30543	3	1	4	1	0	5
mmuiretrom17693	0	0	0	0	0	0
mmu_retrom30047	4	6	1	1	4	2
mmu_retrom15669	0	0	0	0	0	1
mmu_retrop33271	1	0	0	0	0	0
mmu_retrop12773	1	0	1	0	0	6
mmu_retrom37413	0	0	0	0	0	0
mmu_retrop33199	0	0	0	0	0	1
mmuiretrom20668	0	0	0	0	0	1
mmu_retrop22458	0	0	0	0	0	4
mmu_retrom32301	6	2	10	2	0	520
mmu_retrom14962	7	2	0	2	1	2
mmu_retrom34204	0	0	0	0	0	0
mmu_retrom20930	2	2	0	0	1	1
mmu_retrom32309	0	0	0	0	0	0
mmu_retrom34200	1	0	0	1	0	7
mmu_retrop33010	1	1	0	0	0	1
mmu_retrop34433	0	0	1	0	0	20
mmu_retrop18713	1	1	1	0	1	2
mmu_retrop23850	0	0	0	1	0	1316
mmu_retrop17945	64	22	45	40	45	213
mmuiretrom36119	0	0	0	0	0	0
mmu_retrom26542	55	8	0	0	0	0
mmu_retrom37773	0	0	0	0	0	0
mmu_retrop34430	0	1	0	2	0	1
mmuiretrom27177	6	0	7	4	9	2
mmu_retrop36658	0	0	0	0	0	2
mmu_retrom16650	52	38	129	77	196	278
mmu_retrom16651	0	0	0	0	0	1
mmu_retrom22651	0	0	0	0	0	0
mmuiretrop09366	6	4	5	0	0	2
mmu_retrom04425	30	30	43	39	51	21
mmuiretrom07436	1073	382	247	852	4769	824
mmuiretrop33361	1	2	0	1	1	3
mmu_retrom26875	0	0	0	0	0	2
mmuiretrop33363	35	0	1	1	0	2
mmu_retrop17892	0	0	0	0	0	6
mmuiretrom19520	0	0	0	0	0	0
mmu_retrop17891	3	0	0	0	0	1
mmu_retrop17540	11	9	0	0	0	0
mmu_retrop33704	0	0	0	0	0	4
mmu_retrop17543	5	1	10	0	1	6
mmuiretrom36571	0	0	0	1	0	7
mmu_retrom26083	2	2	0	0	0	0
mmu_retrop17547	0	0	0	0	0	87
mmuiretrop29868	0	0	1	0	0	1
mmu_retrom30752	2	1	0	0	0	420
mmu_retrom33018	0	0	1	0	0	0
mmu_retrop19537	0	0	0	0	0	1
mmu_retrom05380	0	0	1	1	1	1
mmu_retrop06981	0	0	0	0	0	3
mmu_retrop06986	0	0	0	0	0	2
mmu_retrop34127	0	0	0	0	0	1
mmu_retrop19530	4	0	0	0	1	153
mmu_retrop13867	0	0	0	0	0	1
mmuiretrom19846	47	6	20	9	25	120
mmu_retrop19283	0	0	2	1	2	6
mmu_retrop13864	1	0	0	1	0	0
mmu_retrop33700	31	21	18	21	15	63
mmu_retrop19284	47	9	5	2	2	9
mmu_retrop19286	0	0	0	0	0	5
mmu_retrop18801	0	0	0	0	0	0
mmu_retrom04391	8	6	6	5	3	23
mmu_retrom36551	0	1	0	0	0	3
mmu_retrop28235	11	2	2	3	4	70
mmu_retrom24956	0	0	0	0	0	2
mmu_retrop05461	1	0	1	0	0	2
mmu_retrom24954	1	1	0	0	0	4
mmu_retrop33703	0	0	0	0	0	18
mmu_retrom24952	0	0	0	0	0	0
mmu_retrom35951	0	0	0	0	0	0
mmu_retrop16397	1	0	0	0	0	1
mmu_retrom09703	1	0	0	0	0	1
mmuiretrom07726	5	2	5	3	0	4
mmu_retrom31250	569	343	62	96	130	291
mmu_retrop25201	0	0	0	0	0	0
mmu_retrop24070	1	0	0	0	0	1
mmu_retrom03606	3	5	0	0	0	2
mmuiretrom05556	0	0	0	0	1	3
mmu_retrom21387	0	0	0	0	0	0
mmu_retrop18481	1121	362	119	89	70	269
mmuiretrom22180	4	7	4	2	0	36
mmuiretrop18530	1	0	0	0	0	0
mmu_retrom35539	0	0	0	0	0	1
mmu_retrop34058	3	0	4	0	5	7
mmu_retrop19624	1	0	4	5	2	28
mmu_retrop35896	7	5	1	4	6	38
mmuiretrom14638	2	0	0	0	0	13
mmuiretrom23857	0	0	0	0	0	0
mmu_retrop35236	32	10	3	4	15	44
mmu_retrop12357	3	0	0	0	3	12
mmu_retrop39568	0	0	0	0	0	2
mmu_retrom14583	1	0	3	1	0	4
mmuiretrom17908	1	0	0	0	0	65
mmuiretrom22853	0	0	1	0	0	1
mmu_retrop39563	0	0	0	0	0	0
mmu_retrop31192	5	0	2	0	1	2
mmu_retrom34649	0	0	1	0	0	53
mmu_retrom31339	314	168	369	167	458	844
mmu_retrop24624	1	0	0	0	0	0
mmu_retrom14668	2	0	0	0	0	1
mmu_retrop12398	73	36	22	49	54	1075
mmu_retrop16844	1	0	1	0	0	4
mmu_retrop08673	3	0	0	0	2	1
mmu_retrom24480	0	0	0	0	0	6
mmuiretrop14660	72	12	20	5	7	137
mmu_retrom11375	23	11	0	3	5	10
mmu_retrom24484	0	0	0	1	0	4
mmu_retrom31336	4	1	0	0	0	9
mmuiretrop15590	8	0	0	3	0	20
mmuiretrom24674	13	13	2	4	6	15
mmu_retrom24290	1	1	2	0	0	27
mmu_retrom10234	1	0	2	0	1	1
mmu_retrom09677	0	0	0	0	0	2
mmu_retrom37950	0	0	0	0	0	1
mmu_retrop32227	34	12	25	6	41	829
mmuiretrom34847	0	0	0	0	0	0
mmu_retrom09670	1	0	0	0	0	0
mmu_retrom23178	0	1	0	0	1	4
mmu_retrop30910	4	0	0	2	0	6
mmu_retrop30912	2	0	0	0	1	4
mmu_retrom37799	0	1	0	0	1	0
mmu_retrop10060	198	51	26	14	57	130
mmuiretrop24083	1	0	0	0	0	0
mmu_retrop14013	40	29	20	19	27	77
mmu_retrop08883	0	0	1	8	30	2
mmuiretrom35829	0	0	0	0	0	0
mmuiretrom33895	1	1	0	0	1	1
mmu_retrop39699	0	0	0	1	2	0
mmu_retrop36611	1	0	0	0	0	0
mmu_retrom28464	5	1	0	0	0	1
mmu_retrop15169	0	0	0	0	0	3
mmuiretrop23817	1	0	0	0	1	0
mmu_retrop39692	4	2	2	6	4	7
mmu_retrom15894	6	5	4	7	6	18
mmu_retrop24149	2	3	0	0	0	1
mmu_retrop35520	2	0	0	2	2	1
mmuiretrop19063	0	0	0	0	0	1
mmu_retrom05568	2	7	0	0	0	22
mmu_retrop33880	0	0	0	0	0	0
mmuiretrop38520	1	2	1	0	0	1
mmuiretrop33428	6	3	4	1	1	25
[truncated: 2,927 more rows]

## Sheet: Mouse
# Supplemental Table S2: Retrocopy expression (≥1 unique read) in mouse
# The number of unique reads refers to those mapped in all samples from the same organ
# The number of unique reads mapping on each retrocopy locus (as defined in Supplemental Table S1) was obtained using the CoverageBed function from the Bedtools suite.
retro_ID	Brain	Cerebellum	Heart	Kidney	Liver	Testis
mus_retrop46416	0	0	0	0	0	0
mus_retrop46148	10	3	1	14	3	46
musiretrom27159	2	0	0	0	0	0
mus_retrom107725	0	0	0	0	0	0
mus_retrop71536	0	0	0	0	0	0
mus_retrop71534	4	0	0	0	0	111
mus_retrop92220	84	11	11	40	61	40
mus_retrop71282	0	0	0	1	0	0
mus_retrom46819	0	0	0	0	0	0
mus_retrom108387	1	0	0	0	0	13
mus_retrop71538	0	0	0	0	0	0
mus_retrom124249	0	0	1	0	0	10
mus_retrom124246	0	0	2	0	3	2
mus_retrom72234	1	0	1	1	2	39
musiretrom09420	0	0	0	0	1	72
musiretrom22653	0	0	0	0	0	0
mus_retrop92041	4	0	0	1	1	0
mus_retrom71762	1	0	0	0	0	10
mus_retrom71765	19	8	4	8	2	11
mus_retrom79518	0	0	0	0	0	2
musiretrop01784	0	0	0	0	0	0
mus_retrom123049	9	0	1	2	1	6
mus_retrop101290	0	0	0	0	0	0
mus_retrop71754	2	0	0	0	0	2
mus_retrop71759	9	2	0	0	2	8
mus_retrom123736	5	3	0	4	1	1
mus_retrop52533	4	0	2	3	2	5
mus_retrom66774	0	0	0	0	0	0
mus_retrom40748	0	0	0	0	0	0
mus_retrop79391	1	1	6	3	1	2
mus_retrom99742	4	0	1	0	0	2
mus_retrop53911	0	0	0	0	0	0
musiretrop05201	2	4	0	0	2	13
mus_retrop114202	40	1	0	0	0	0
mus_retrop114208	0	0	0	0	0	0
mus_retrop114209	0	0	0	0	0	0
mus_retrom45869	0	0	0	0	0	1
mus_retrop98697	0	0	0	0	0	0
mus_retrom45861	30	4	4	5	3	45
musiretrom24179	0	0	0	0	0	0
mus_retrom96299	12	0	1	1	2	9
mus_retrom96296	3	7	1	1	2	34
mus_retrom106458	0	0	0	0	0	1
mus_retrop96038	0	0	0	0	0	3
mus_retrop96030	6	6	19	9	65	29
mus_retrop96033	7	4	1	0	1	408
mus_retrom106183	0	0	0	0	0	0
mus_retrop45728	0	0	0	0	0	4
mus_retrop73671	8	2	3	2	5	4
mus_retrop79531	2	0	0	0	0	1
mus_retrom50455	1	0	0	0	0	0
mus_retrom67132	0	0	0	0	0	1
mus_retrom71816	2	2	6	0	0	1435
mus_retrop74489	0	1	0	0	0	0
mus_retrom124815	0	0	0	0	0	5
mus_retrom124810	1	2	0	1	2	3
mus_retrop73450	122	37	23	31	20	17
mus_retrop74483	1	0	1	1	0	2
mus_retrom70631	0	0	0	0	0	0
mus_retrop66421	0	1	0	0	0	0
mus_retrop66420	1	0	0	0	0	0
mus_retrop66422	0	0	0	0	0	0
mus_retrop66425	0	0	0	0	0	0
musiretrom35422	0	1	0	0	1	0
mus_retrop112333	22	4	7	12	8	5
musiretrom01802	0	0	0	0	0	0
mus_retrom91745	6	1	1	0	3	4
mus_retrop113428	0	0	0	0	0	1
mus_retrom105212	2	0	0	0	0	57
mus_retrom105218	0	0	0	0	0	0
mus_retrop113423	0	0	0	0	0	0
mus_retrom72891	18	6	16	8	10	2
mus_retrom100600	2	1	4	0	2	1
mus_retrop58175	0	0	0	0	0	0
mus_retrop44451	0	0	0	0	0	0
mus_retrom44597	1	0	1	0	3	0
musiretrop01789	0	0	0	0	0	0
mus_retrom46567	2	2	1	1	5	1
mus_retrom46560	0	0	0	0	0	0
mus_retrom121805	3	1	0	1	0	198
mus_retrom121804	1	0	0	0	0	5
mus_retrom42276	0	0	1	1	0	0
mus_retrom42271	6	0	2	3	0	5
mus_retrom100933	1	0	0	0	0	9
mus_retrop49724	3	0	0	0	0	1
mus_retrop49729	0	0	0	0	0	1
mus_retrop100839	0	0	0	0	0	1112
mus_retrop65817	3	1	5	1	0	1
mus_retrop69517	9	1	7	2	8	6
mus_retrom61686	0	1	0	0	0	0
mus_retrom61680	0	1	0	0	0	0
mus_retrop95440	65	10	0	3	0	263
musiretrom21529	4	2	0	1	0	2
mus_retrom123897	0	0	0	0	2	0
mus_retrop56403	0	2	0	0	1	49
mus_retrom123892	7	3	1	1	2	239
mus_retrom123890	6	15	8	15	10	128
mus_retrop53042	0	0	0	0	0	0
mus_retrop52324	0	0	0	0	0	3
mus_retrop52981	14	9	2	13	2	2
mus_retrom48748	0	0	0	0	0	10
mus_retrop114191	0	0	0	0	0	0
mus_retrom62084	0	1	0	0	0	1
musiretrop33448	0	0	0	0	0	0
mus_retrom62081	17	20	4	6	3	7
musiretrom13730	2	3	5	18	2	3
mus_retrom98793	0	0	0	0	1	0
mus_retrom98798	2	0	0	1	1	18
mus_retrop65764	10	1	2	0	0	376
mus_retrop65763	22	2	0	1	14	46846
mus_retrop52181	0	0	1	1	1	0
mus_retrom48561	0	0	0	0	0	1
mus_retrop91929	1	0	1	0	1	1
musiretrom31520	1	0	5	2	5	4
mus_retrop52187	133	30	36	184	111	563
mus_retrom124384	2	1	1	0	4	2
mus_retrom59259	0	0	0	0	0	0
mus_retrom124651	0	0	0	0	1	0
mus_retrom66771	0	0	0	0	0	0
mus_retrop70347	32	1	16	21	9	11
musiretrop12410	0	0	0	0	0	1
mus_retrop51984	1	0	0	1	0	1
mus_retrop51980	0	0	0	6	0	6
mus_retrop92698	5	1	11	2	3	0
mus_retrop51983	18	1	2	3	2	2
mus_retrop110699	0	0	0	0	0	0
mus_retrom73554	23	10	2	13	6	25
mus_retrop110694	0	0	0	0	0	52
mus_retrom73550	0	0	0	0	0	0
musiretrom08123	3	0	2	1	1	4
mus_retrop110690	4	2	0	0	0	2
mus_retrop79702	15	5	6	13	6	4
mus_retrom124035	0	0	0	0	0	0
mus_retrom124037	0	0	0	0	0	1
mus_retrop53057	5	0	0	3	2	1
mus_retrom124033	0	0	0	0	1	0
mus_retrop100829	4	0	0	0	0	1
mus_retrom67303	3	4	7	5	6	6
mus_retrom67306	5	2	0	0	0	5
musiretrom17344	0	0	0	0	0	6
mus_retrom51086	0	2	1	2	0	0
mus_retrom97027	1	0	0	0	0	0
mus_retrom96378	0	0	1	0	0	2
musiretrop30944	69	2	0	0	0	178
mus_retrom99532	31	12	13	6	12	38
mus_retrom123388	0	0	0	0	0	1
mus_retrom99535	4	2	0	0	1	8
mus_retrom49160	0	0	0	0	0	0
mus_retrop46604	0	0	0	0	0	8
mus_retrom41379	18	28	11	50	34	57
mus_retrop53278	7	2	0	2	0	59
mus_retrop46353	22	4	0	1	1	6
mus_retrop104109	4	1	1	0	3	1
musiretrop27939	0	0	0	0	0	0
musiretrop27932	0	0	0	0	0	0
mus_retrom102194	170	23	6	11	4	15
mus_retrop42273	13	1	4	2	4	7
mus_retrop42276	21	1	0	1	2	35
mus_retrop93077	0	0	0	0	0	1
mus_retrop44605	4	2	2	0	3	3
mus_retrom123569	3	4	1	0	3	28
mus_retrop96752	0	0	0	2	0	62
mus_retrom41215	12	2	1	1	1	17
mus_retrom58618	7	0	0	0	0	28
mus_retrom58619	0	0	0	0	0	1
mus_retrom65967	1	0	0	0	1	1
mus_retrop102418	4	1	0	1	2	5
mus_retrop54587	0	0	0	0	0	1
mus_retrop66309	9	2	0	0	1	9
musiretrop04636	0	0	1	0	0	0
mus_retrop87171	9	1	0	1	0	2
mus_retrom66430	0	0	0	0	0	0
mus_retrop101882	0	0	0	0	0	0
musiretrop05547	0	1	0	0	0	0
mus_retrop54058	0	0	0	0	0	1
mus_retrom106247	0	0	1	0	0	2
mus_retrom106245	0	0	0	0	0	1239
musiretrom23845	5	1	0	0	7	4
musiretrom23844	6	1	14	3	0	87
mus_retrop112456	1	1	1	2	0	1
musiretrop08136	1	0	0	0	0	0
mus_retrop112451	4	0	0	0	0	26
mus_retrop50261	9	8	1	0	1	13
musiretrom05896	40	16	34	15	5	0
mus_retrop48741	3	0	3	1	1	2
mus_retrom59889	0	0	0	0	0	0
mus_retrom59880	0	0	0	0	0	0
mus_retrop37019	0	0	0	0	0	0
mus_retrop50118	0	0	1	0	0	0
mus_retrop48605	1	2	1	1	1	8
mus_retrop48604	7	1	2	3	3	12
mus_retrom79957	2	2	1	0	2	4
mus_retrom79954	238	20	38	8	29	453
mus_retrop70641	7	2	4	1	1	11
musiretrop08791	0	0	0	0	0	0
mus_retrop70649	0	1	1	0	0	3
mus_retrop69651	0	0	0	1	4	1
mus_retrop69302	6	5	0	1	0	1
mus_retrop74732	43	25	7	5	4	12
mus_retrop47988	20	0	1	0	3	17
mus_retrop66935	0	0	0	0	0	0
mus_retrom42590	9	1	1	2	1	401
mus_retrom95505	1	0	0	0	0	0
mus_retrom95503	1	1	0	2	0	1
mus_retrom81815	0	0	0	0	0	4
mus_retrom100037	5	0	1	0	0	192
mus_retrop97037	0	1	0	5	2	1
musiretrop29729	88	11	10	28	10	81
mus_retrom69519	13	1	2	3	0	5
mus_retrom42042	5	3	2	2	0	0
mus_retrom42043	101	15	12	8	7	61
mus_retrop95053	13	8	3	3	3	1
mus_retrom69511	0	0	0	0	0	2
mus_retrop49910	0	1	1	0	0	21
musiretrom33497	0	0	0	0	0	0
musiretrop12623	1	16	1	1	0	0
mus_retrop35858	0	0	0	0	0	0
musiretrom36849	15010	3008	1263	1295	1630	2442
mus_retrom41588	1	1	2	2	2	31
mus_retrop71512	0	0	0	0	0	0
mus_retrop71517	1	0	1	0	0	4
mus_retrom106184	1	1	0	1	10	3
musiretrom01651	0	0	0	0	0	714
mus_retrom69472	1	0	2	1	0	39
mus_retrop100450	13	3	5	5	3	9
mus_retrop100454	31	8	12	31	27	12
mus_retrop100457	1	0	2	0	0	1
mus_retrop77644	0	0	0	0	0	0
mus_retrom79573	0	0	0	0	0	0
mus_retrop52049	0	0	0	0	0	45
musiretrop21499	1	1	0	0	0	0
mus_retrop52510	0	0	0	0	0	7
mus_retrop101277	0	0	0	0	0	0
mus_retrop52514	0	0	0	0	0	0
mus_retrop52043	9	2	0	1	1	63
musiretrop25936	0	0	0	0	0	1
mus_retrom40760	0	0	0	1	2	0
mus_retrom49374	0	2	1	0	0	1
mus_retrom49800	4	1	0	0	1	5
mus_retrop46166	380	54	47	76	45	166
mus_retrom62921	6	1	1	3	1	39
mus_retrom106471	3	0	0	0	0	2
mus_retrop54261	0	0	0	0	1	0
mus_retrom97761	7	2	4	3	0	4
mus_retrom59062	9	4	0	0	1	1
mus_retrom108108	0	0	1	0	0	12
musiretrop30007	8	4	1	0	0	3
musiretrop30005	0	1	6	2	1	1
mus_retrop96584	6	6	3	4	3	15
mus_retrop96587	5	6	2	4	4	9
mus_retrop96581	5	4	3	2	3	3
mus_retrom71703	0	0	1	0	0	0
mus_retrop46294	16	10	3	7	4	95
mus_retrom71706	0	0	0	0	0	2
mus_retrop93339	443	159	262	215	322	188
mus_retrom72610	0	0	0	0	0	0
mus_retrom71839	0	0	0	0	0	0
mus_retrom71832	20	2	1	4	3	15
mus_retrom91505	0	0	0	0	0	40
mus_retrop66114	1	0	0	0	0	5
mus_retrom124836	0	0	0	0	0	0
mus_retrop113195	1	0	0	0	0	2
mus_retrop66446	0	0	0	0	0	0
mus_retrop66445	0	0	0	0	0	0
mus_retrom61844	25	7	4	3	3	3
musiretrom12129	1	0	0	0	1	0
musiretrom12126	5	0	0	0	0	1
musiretrom12124	5	2	4	2	2	18
mus_retrom96410	0	0	1	0	0	10
mus_retrop44295	0	0	3	3	0	0
mus_retrop49358	0	0	1	1	0	1
mus_retrop86183	0	0	0	0	0	0
mus_retrom42608	14	4	4	6	2	7
mus_retrop49355	3	0	0	0	0	2
mus_retrom43951	0	0	0	0	0	4
mus_retrom69736	0	0	0	0	0	0
musiretrop32409	2	0	0	0	0	32
mus_retrop44475	1	0	0	0	0	2
mus_retrop86988	13	0	0	0	0	0
mus_retrop113999	0	2	1	2	0	1
mus_retrom100626	14	0	0	1	3	18
mus_retrop102196	0	1	1	0	0	0
mus_retrop58116	0	0	0	0	0	0
mus_retrop102194	0	0	0	0	0	0
mus_retrom68482	7	0	3	0	0	0
mus_retrom68483	0	0	0	0	0	0
mus_retrom68486	9	0	0	3	2	2
musiretrom04553	0	0	0	0	0	0
mus_retrop85328	0	1	0	0	0	4
mus_retrom61512	1	0	0	1	0	0
mus_retrop49749	0	0	0	0	0	2
mus_retrom100489	2	0	2	1	42	2
mus_retrop49740	4	3	0	0	0	5
mus_retrom100950	76	55	107	75	98	191
musiretrom38052	219	21	0	2	1	3
mus_retrop69537	0	0	0	0	0	0
musiretrom02814	288	57	17	6	0	121
mus_retrop112711	1	1	0	0	0	96
mus_retrop112714	13	3	4	2	2	10
mus_retrop112719	0	0	0	0	0	18
mus_retrop55080	0	2	2	1	0	109
mus_retrop69799	0	0	0	0	1	2
musiretrop34807	0	0	0	0	0	0
musiretrop34802	0	0	0	0	0	0
mus_retrom98128	3	1	3	6	0	77
mus_retrop69791	95	99	77	155	82	90
mus_retrom104019	0	0	0	0	0	1
mus_retrom45657	3	2	0	0	0	14
mus_retrop71096	9	5	1	0	0	3
mus_retrom45658	0	0	1	1	0	10
mus_retrom48760	0	0	1	0	0	0
mus_retrop70584	2	1	2	1	2	1
mus_retrop70581	0	0	0	0	0	1
mus_retrop65748	1	1	2	0	0	0
mus_retrom65819	11	5	5	13	8	10
mus_retrom125011	585	160	142	85	23	711
mus_retrom125013	4	13	2	0	0	18
mus_retrop74690	0	0	0	0	0	0
mus_retrop106698	0	1	0	1	0	66
musiretrop41132	198	65	18	26	12	159
mus_retrom59270	0	0	0	0	0	0
mus_retrop95933	4	0	0	1	0	15
mus_retrom59274	0	0	0	0	0	4
mus_retrom124634	0	0	1	0	2	93
mus_retrom124633	0	0	0	0	0	0
mus_retrom124630	0	0	0	0	0	0
mus_retrop70363	2	0	0	0	0	1
mus_retrop96910	2	0	1	0	0	0
musiretrom40047	25	6	0	2	0	8
mus_retrom73575	1	0	0	0	0	0
mus_retrom73570	1	0	0	0	2	198
mus_retrom73579	0	0	0	0	0	1
mus_retrom99338	0	0	0	0	0	0
mus_retrom72112	0	0	0	0	0	12
mus_retrom103596	0	0	0	0	0	0
mus_retrom72117	1	0	0	0	0	2
mus_retrop53075	248	12	7	11	12	164
mus_retrom99337	1	0	0	0	1	1
mus_retrom49492	3	4	0	4	3	4
mus_retrop100667	1	0	0	2	2	7
mus_retrom49496	0	0	0	0	0	0
mus_retrop100840	0	0	1	0	0	1
mus_retrop104340	101	21	3	1	1	4
mus_retrom49499	0	0	0	0	0	0
mus_retrom97594	0	0	2	6	49	1
mus_retrom51063	1	1	4	0	0	1
mus_retrom51068	5	0	0	1	0	0
mus_retrom123369	52	22	9	11	2	186
mus_retrom96310	22	5	4	4	2	272
mus_retrom49142	1	0	0	2	0	0
mus_retrop58282	7	2	0	0	0	17
mus_retrom108820	9	7	4	0	10	12
mus_retrop53257	1	0	0	0	2	1
mus_retrom49633	7272	3640	3424	1041	478	447
mus_retrop49103	0	0	0	0	0	0
mus_retrop46335	0	0	0	0	0	1
mus_retrop46334	2	0	0	1	0	21
mus_retrop46339	1	2	0	0	0	1
mus_retrop46338	0	0	0	0	0	0
mus_retrop104162	4	0	0	0	0	1
mus_retrom79496	0	0	0	0	0	0
mus_retrop75256	10	2	0	1	0	6
mus_retrom66633	25	18	12	4	7	3
mus_retrop75253	0	1	0	0	0	0
mus_retrom66186	13	9	6	9	4	15
mus_retrom58636	0	0	0	0	1	17
mus_retrop89601	0	0	0	0	0	2
mus_retrom65981	10	1	1	0	0	148
mus_retrom43898	0	0	0	0	0	1
mus_retrop51938	4	0	0	4	1	1
mus_retrop66325	3	0	0	0	0	0
mus_retrop54701	7	4	3	4	7	8
mus_retrop113298	71	30	52	61	65	41
mus_retrom50557	31	0	0	0	0	19
mus_retrom50556	20	29	14	5	9	0
mus_retrop50285	0	0	0	0	0	0
mus_retrop48766	10	3	4	1	5	24
mus_retrop66586	2	0	0	0	0	0
mus_retrop66582	0	0	0	0	0	0
mus_retrop66583	4	0	1	0	0	0
mus_retrom59862	0	0	0	0	0	0
mus_retrop66589	1	0	0	0	0	2
musiretrop11613	0	0	0	0	0	3
mus_retrop69495	0	0	0	0	0	2
mus_retrom80384	0	0	1	0	0	0
mus_retrop114548	1	2	1	1	0	2
mus_retrop113876	18	6	5	16	7	161
mus_retrop113871	1	0	0	0	0	0
musiretrop33124	0	1	1	0	0	0
mus_retrom100015	0	0	0	0	0	0
mus_retrom100542	0	0	0	0	0	0
mus_retrom79932	7	10	6	2	7	1
mus_retrom100547	5	1	6	1	2	12
mus_retrom79939	0	0	0	0	0	0
mus_retrop78809	6	1	0	0	0	0
musiretrop32613	0	2	0	0	1	0
mus_retrom41949	8	8	5	8	0	77
mus_retrop49680	2	1	3	0	0	9
mus_retrom62633	17	1	12	7	7	10
mus_retrom68296	0	0	0	0	0	3
mus_retrom62981	60	18	6	3	3	10
mus_retrop51886	0	0	0	0	0	0
mus_retrop48889	0	0	0	0	0	0
mus_retrop56368	23	7	0	0	0	5
mus_retrom79400	56	1	0	5	3	28
mus_retrom69530	0	1	1	0	0	2
mus_retrom69533	4	0	4	3	3	11
mus_retrom69532	1	3	0	1	0	2
mus_retrop95034	8	0	1	1	4	2
mus_retrom73181	0	0	0	0	0	0
mus_retrom73180	58	3	5	9	9	56
mus_retrop100478	2	0	1	1	2	0
mus_retrop100476	0	0	0	0	0	0
mus_retrop100474	0	0	0	0	0	1
musiretrop32793	0	0	0	0	0	0
musiretrop08845	977	448	281	299	192	469
mus_retrom107240	0	0	0	0	0	0
mus_retrop96857	0	0	0	1	0	4
mus_retrop52066	2	2	1	2	3	7
mus_retrop91688	0	1	0	0	0	3
mus_retrom40700	51	9	7	23	26	44
mus_retrom40704	20	7	2	0	1	1436
mus_retrop100786	0	0	0	0	0	0
mus_retrop98906	0	0	0	0	0	0
mus_retrom106415	0	0	0	0	0	0
mus_retrom97784	12	7	0	3	3	0
mus_retrom106412	0	0	0	0	0	0
mus_retrop93131	1	0	1	1	2	1
mus_retrom45826	12	3	5	7	2	11
mus_retrop98309	1	0	0	1	0	0
mus_retrop97169	6	3	0	1	3	3
mus_retrom106418	0	0	0	0	1	431
mus_retrom59042	0	0	1	1	0	3
mus_retrom72589	16	9	7	16	6	6
mus_retrom72580	1	0	0	0	0	1
mus_retrom123772	4	1	1	2	0	1
mus_retrom108123	0	1	0	1	0	11
mus_retrom71725	0	0	0	0	0	0
mus_retrom71721	0	0	1	0	0	0
mus_retrop92081	1	1	0	1	0	0
mus_retrop92088	0	0	0	0	0	1
mus_retrom66840	0	0	0	0	0	1
mus_retrom96789	78	0	1	4	1	89
mus_retrom96780	1	0	1	0	0	0
mus_retrop71260	14	2	0	0	0	4
mus_retrom71852	0	0	0	0	0	0
mus_retrom91527	0	0	0	0	0	9
mus_retrom71850	0	0	0	0	0	0
mus_retrom91523	6	0	3	0	1	43
mus_retrom98872	0	0	0	0	0	1
mus_retrop54932	0	0	0	0	0	0
mus_retrop54931	5	2	3	1	0	1
mus_retrom105787	0	0	0	0	0	25
mus_retrop66461	0	0	0	1	0	10
mus_retrop66462	0	0	0	0	0	0
mus_retrom41145	5	0	0	0	0	4
mus_retrop44277	3	1	0	0	1	4
mus_retrop44270	3	2	0	1	0	1
musiretrom12144	13	6	0	0	0	4
mus_retrop92715	2	0	0	1	0	1
mus_retrom68727	0	0	0	0	0	0
mus_retrom68722	7548	2935	31	9	6	3
musiretrop31221	2	0	0	0	0	3
mus_retrom40956	19	13	56	5	0	31
mus_retrom40954	1	0	5	0	0	0
mus_retrom40958	1	2	1	2	0	0
mus_retrop44411	3	2	0	0	0	1
mus_retrop58136	12	1	1	4	2	26
mus_retrom57265	0	0	0	0	0	0
mus_retrop113462	8	2	2	2	1	4
mus_retrop44418	0	0	0	0	0	0
mus_retrom41026	0	0	0	0	0	0
mus_retrom41029	153	121	37	60	44	137
musiretrop01925	0	0	0	0	0	0
musiretrop01924	0	0	0	0	0	4
mus_retrom60116	10	0	0	0	0	1
musiretrom34214	0	0	0	0	0	36
musiretrop11406	0	0	0	0	0	0
mus_retrop37730	0	0	0	0	0	0
mus_retrom121841	3	0	1	0	1	31
musiretrom10222	0	0	0	0	0	0
mus_retrop69804	0	0	0	0	0	9
mus_retrop69801	0	0	0	0	0	1
mus_retrom80465	9	0	1	3	1	6
musiretrom15334	57	49	69	45	70	31
mus_retrop112735	5	4	2	4	3	1
mus_retrop112732	0	1	0	0	0	0
mus_retrom66136	32	0	0	0	0	56
mus_retrop112739	2	0	0	9	36	16
musiretrom21563	9	7	0	1	0	9
mus_retrop59669	7	2	3	1	1	6
mus_retrom40573	3	0	0	2	1	1
mus_retrom40576	6	1	7	5	7	8
mus_retrop70565	2	0	0	103	164	0
mus_retrop94535	0	1	0	0	0	0
mus_retrop94531	0	0	0	0	0	0
musiretrom09074	4	1	1	1	0	1
mus_retrom72355	27	5	4	1	2	0
mus_retrop70306	0	0	0	0	0	0
mus_retrop70305	1	1	1	0	5	1
mus_retrop114010	0	0	1	0	0	4
mus_retrop96971	2227	771	7	2	0	30
mus_retrop113259	0	0	0	0	0	0
mus_retrop96975	121	14	16	12	0	2
musiretrom08343	8	1	1	2	1	7
mus_retrop47027	830	216	572	67	51	75678
mus_retrom48709	0	0	0	0	0	0
mus_retrom100203	11	11	0	1	0	0
mus_retrom97206	0	0	0	0	0	0
mus_retrom100206	1	0	1	0	0	0
mus_retrom48703	21	6	1	2	2	2
mus_retrom100209	0	0	0	0	0	0
mus_retrom99312	5	0	0	2	0	3
mus_retrom99313	2	0	0	0	4	2
mus_retrom103579	91	1	0	1	3	11
mus_retrom103578	1	0	0	0	0	0
mus_retrom96158	0	0	0	0	0	0
mus_retrop53015	4	2	0	1	0	0
mus_retrom41627	1	0	0	0	0	1
musiretrom22866	14	3	1	993	0	1
musiretrom22867	0	0	0	4	0	26
mus_retrop100869	0	0	0	0	0	0
mus_retrom41620	5	4	0	0	1	4
mus_retrop100866	0	0	0	0	0	0
mus_retrop104362	0	0	2	1	0	0
mus_retrop100860	0	0	0	0	0	1
mus_retrop104360	0	0	0	0	0	3
mus_retrop100314	0	0	0	0	0	0
mus_retrop39154	0	0	0	0	0	0
musiretrop21021	1	0	0	0	0	0
mus_retrop95957	4	2	3	7	5	293
mus_retrop39152	0	0	0	0	0	0
mus_retrop49162	1	0	1	0	0	414
musiretrop20373	4	6	0	0	1	0
mus_retrop46316	8	0	1	2	0	0
mus_retrop49167	0	0	0	0	0	0
mus_retrop46313	0	0	0	0	0	23
mus_retrop92740	3	2	0	1	0	138
mus_retrom108802	1	0	0	0	1	9
mus_retrom101811	2	2	1	2	3	1
mus_retrom68912	0	0	0	0	0	62
mus_retrom63020	2	2	2	4	1	31
mus_retrom63023	0	0	0	0	0	34
mus_retrom43705	1	2	0	0	0	3
mus_retrom68918	4	1	1	0	0	0
mus_retrom63026	0	0	0	0	0	0
mus_retrop56406	2	1	0	0	1	0
mus_retrop49416	0	0	1	0	0	67
mus_retrop96794	4	0	0	0	0	2
mus_retrop96792	0	1	0	0	0	0
mus_retrop54547	172	26	62	61	60	99
mus_retrop100018	10	18	19	16	2	0
mus_retrom123526	19	9	89	0	0	24
mus_retrom66475	4	0	1	0	0	2
mus_retrop87133	1	0	0	0	0	0
mus_retrom66476	4	3	1	0	1	1
mus_retrop87136	0	0	0	0	0	2
mus_retrop52726	6	0	1	3	2	5
mus_retrom96332	1	1	0	0	0	0
mus_retrom102041	0	0	0	0	0	0
mus_retrom102046	24	11	11	6	7	10
mus_retrom91315	1	2	1	0	0	0
musiretrom42372	3	1	0	1	0	10
mus_retrop54096	0	0	1	0	2	18
mus_retrop73797	22	5	2	2	1	2
mus_retrop73790	3	0	0	0	0	1
mus_retrop44647	0	0	0	1	0	0
mus_retrop44646	7	2	4	4	3	1
mus_retrom106204	45	13	2	1	0	2
mus_retrop44642	5	3	1	1	2	2
mus_retrom50572	5	17	2	297	550	11
mus_retrop44648	0	0	0	0	0	1
mus_retrop86083	0	0	0	0	0	0
musiretrom21771	4	1	0	0	1	0
musiretrom30454	1	0	0	0	0	0
mus_retrom101789	5	3	4	2	0	5
musiretrop37537	2	0	1	0	0	0
mus_retrom59842	0	0	3	0	1	0
mus_retrom101969	20	39	10	11	3	0
mus_retrop86661	32	6	3	5	2	1
mus_retrom100784	7	3	0	1	0	1
mus_retrop58098	0	0	0	0	0	0
musiretrom12356	38	7	1	3	1	2
mus_retrop58091	6	5	1	6	0	2
mus_retrop113816	303	17	53	26	49	277
mus_retrom44482	19	1	1	0	2	18
mus_retrop69612	1	0	0	0	0	0
mus_retrop78820	2	0	0	1	0	2
mus_retrop78825	10	0	1	0	16	33786
musiretrom33181	0	0	0	0	0	0
mus_retrom46399	0	0	0	0	0	8
mus_retrom42553	14	9	19	8	13	0
mus_retrom65642	16	4	1	6	3	10
mus_retrom62960	5	0	1	0	1	2
mus_retrom62969	66	27	1	1	2	3
mus_retrop94949	0	0	0	0	0	1
mus_retrom71654	24	8	0	2	0	0
mus_retrom61703	43	18	11	7	6	35
mus_retrom46646	3	0	5	2	1	4
mus_retrom46648	0	1	1	1	0	19
mus_retrom32969	0	0	0	0	0	0
mus_retrom42083	0	0	0	0	0	260
mus_retrom42080	7	2	8	17	34	0
mus_retrom69556	2	0	0	1	0	9
musiretrop21907	22	12	1	4	2	1213
mus_retrop91042	2	3	0	0	0	0
mus_retrop95019	5	3	2	5	12	1
mus_retrop91049	2	1	0	0	1	4
mus_retrop49957	3	0	0	0	0	5
mus_retrop70176	0	0	0	0	0	0
mus_retrop71222	0	0	0	0	2	3
mus_retrop71221	41	18	4	12	15	36019
musiretrom42570	0	0	1	0	0	71
mus_retrom65881	1	1	1	0	0	1
musiretrom36808	1	0	1	0	0	6
mus_retrop95915	9	3	0	1	0	455
mus_retrom69438	80	11	8	4	23	43
mus_retrom69436	1	0	0	0	0	862
mus_retrop100413	0	0	0	0	0	1
mus_retrom39187	0	0	0	0	0	4
mus_retrom97414	5	1	4	2	8	2
mus_retrom97410	8	0	4	1	2	3
musiretrop41077	0	0	1	0	0	60
mus_retrop52002	0	0	0	0	0	0
mus_retrop52006	1	1	0	0	0	2
mus_retrom96995	0	0	0	0	0	0
mus_retrom108490	6	0	0	0	1	4
mus_retrop92532	12	2	1	5	4	3
mus_retrop92245	0	0	0	0	1	8
musiretrom40360	0	0	0	0	1	3
mus_retrop93110	138	20	24	13	3	50
mus_retrop98672	1	2	1	1	0	2552
mus_retrom124150	9	0	1	2	3	6
mus_retrom106435	0	0	0	0	0	608
mus_retrom106437	14	7	7	11	8	1
mus_retrom124406	2	0	2	0	1	7
mus_retrop76024	0	0	0	0	0	1
mus_retrop76026	1	2	1	2	0	1
mus_retrom59024	0	0	1	0	0	0
mus_retrop76021	4	0	0	0	0	10
mus_retrom59026	3064	575	0	0	0	349
mus_retrom102232	7	4	2	2	0	2
mus_retrop96099	0	0	0	0	0	15
mus_retrom123759	2	0	0	3	1	2
mus_retrom108147	0	0	0	0	0	0
mus_retrom108145	0	0	0	0	0	0
mus_retrop96095	3	0	0	0	0	0
mus_retrop74336	1	1	0	0	0	12
mus_retrom66829	0	0	0	0	0	0
musiretrop18566	17	5	7	9	11	25
mus_retrop74338	0	0	65	15	22	41
mus_retrom72658	0	0	0	0	0	2
musiretrom41702	0	0	0	0	0	0
mus_retrom99108	14	19	28	18	19	92
mus_retrop45874	0	0	0	0	0	0
musiretrop35412	0	0	0	0	0	0
musiretrop35411	0	0	0	0	0	0
mus_retrom91819	38	13	24	22	15	18
musiretrop35419	0	0	0	0	0	0
mus_retrop44783	1	0	0	0	0	125
mus_retrop44784	0	0	0	0	0	55
mus_retrop44786	0	0	1	0	1	2
mus_retrom58776	0	0	3	1	0	0
mus_retrop46875	10	3	1	2	1	42
mus_retrom107345	0	0	0	0	0	0
mus_retrom68707	99	46	53	38	42	10
mus_retrom43915	13	6	2	5	8	17
mus_retrop98582	1	0	0	0	0	0
mus_retrop93377	0	0	0	0	0	1
mus_retrom43918	1	0	0	0	0	0
mus_retrop45787	349	206	83	379	270	365
mus_retrop98585	5	2	2	2	2	0
mus_retrop44438	0	0	8	0	0	2
mus_retrom40934	0	1	0	0	0	0
mus_retrom50212	1	2	2	1	1	0
mus_retrom105274	0	0	0	0	0	1
mus_retrop102222	8	0	1	1	0	1
mus_retrop114597	1	0	1	0	0	0
mus_retrop54376	1	2	0	1	0	4
mus_retrop54372	2	0	0	1	1	0
mus_retrom68406	5	2	0	0	0	2
mus_retrop112286	4	4	6	5	5	13
musiretrop03810	1	0	0	0	0	2
mus_retrop112759	4	2	1	1	0	0
mus_retrop50078	0	0	0	0	0	1
mus_retrop112755	0	0	0	1	0	1
musiretrop37452	46	36	29	4	3	304
mus_retrop112753	0	0	0	0	0	0
mus_retrom60171	1	1	0	0	1	9
mus_retrop102268	0	0	0	0	0	0
musiretrop38899	162	79	7	7	2	126
mus_retrom45614	1	1	1	0	1	124
musiretrom33512	0	0	0	0	1	1
mus_retrop80512	1	0	0	0	0	0
mus_retrop91188	21	13	2	3	0	3
mus_retrop70541	4	6	0	4	2	6
mus_retrop70542	0	0	0	0	0	0
mus_retrop74657	6	5	2	6	1	0
mus_retrop94001	16	2	5	3	13	13
mus_retrop94006	0	0	0	0	0	0
mus_retrop94004	0	0	0	0	0	0
mus_retrom48725	166	7	9	12	3	855
mus_retrom100227	5	1	1	1	0	0
mus_retrom100222	0	0	0	0	0	0
mus_retrom99933	0	0	0	0	0	3
mus_retrom48723	52	6	4	8	6	34
mus_retrop58512	2	0	3	0	0	1
mus_retrop53033	0	0	0	0	0	1
mus_retrop53035	1	0	0	0	0	0
mus_retrop53038	20	22	0	1	0	26
mus_retrop110455	0	0	0	0	0	1
mus_retrom41605	3	1	3	3	2	1
mus_retrom41609	0	0	0	0	0	1
mus_retrom124363	0	0	0	1	0	3
mus_retrom121789	47	3	1	3	1	29
musiretrom18668	0	1	0	0	0	17
mus_retrom124369	2	1	0	2	0	2
mus_retrom51021	0	0	0	0	0	0
mus_retrom51026	0	0	0	0	0	5
mus_retrop91233	5	6	1	4	5	11
mus_retrom72331	1	0	0	1	0	0
mus_retrop91983	16	6	1	9	4	7
mus_retrom72336	2	0	1	0	1	1
mus_retrop91987	14	0	2	0	1	12
mus_retrom49673	0	0	0	0	0	7
mus_retrop46661	0	0	1	0	0	0
mus_retrom68934	2	23	0	0	0	0
mus_retrop92988	2	2	1	0	0	0
mus_retrop92766	0	0	0	0	0	1
mus_retrom79456	1	0	0	0	0	1
musiretrop17681	0	0	0	0	0	0
mus_retrom43762	0	0	0	0	0	2
mus_retrom43764	0	0	0	0	0	5
musiretrop25898	6	0	1	3	2	1
mus_retrop100339	1	0	0	0	0	2
mus_retrop114022	0	0	0	0	1	0
mus_retrom72488	0	0	2	0	2	2
mus_retrom91486	7	0	2	3	3	9
mus_retrop101570	6210	2426	1324	1288	1038	816
mus_retrom99539	10	1	0	8	0	4
mus_retrop101575	2	0	0	0	0	0
mus_retrom97621	2	1	11	2	9	0
mus_retrop52746	1	0	1	0	0	105
mus_retrom66491	7	4	11	3	4	12
musiretrop14084	1	1	1	0	0	8
mus_retrom96684	3	0	2	0	0	1
mus_retrom50775	0	0	0	0	0	11
mus_retrom49189	0	1	2	5	0	1
mus_retrom49186	0	0	0	0	0	4
mus_retrom96689	3	2	1	0	0	9
mus_retrom91666	0	1	0	0	1	1
mus_retrom91665	0	0	0	0	0	0
mus_retrom102068	0	0	0	1	1	1
mus_retrom101018	18	1	2	16	2	5
mus_retrop45643	26	0	1	1	21	113410
musiretrop36554	0	0	0	0	1	0
mus_retrom50516	52	69	108	69	53	15
musiretrom25654	7	1	0	0	0	3
mus_retrom50519	0	0	1	0	0	0
mus_retrom60099	10	8	4	2	0	0
mus_retrop97461	0	0	1	0	0	0
mus_retrom59829	0	0	1	0	0	1
mus_retrom59822	0	0	1	0	0	1
mus_retrom101902	0	0	0	1	1	2
mus_retrop80727	24	15	6	0	4	11
musiretrom07097	0	0	0	0	0	0
mus_retrom124959	4	1	2	0	0	26
musiretrom35626	0	0	1	1	0	0
mus_retrop113342	0	0	0	0	1	0
mus_retrop69456	0	0	0	0	0	0
mus_retrom100767	0	0	0	0	0	1
mus_retrom100766	0	0	0	1	0	0
mus_retrop66725	3	0	2	3	3	6
mus_retrop58071	0	0	0	0	0	1
mus_retrop50241	1	0	0	0	0	0
musiretrop26465	0	0	1	0	0	1
mus_retrom80165	107	8	1	0	0	25
musiretrop31548	6	3	2	6	6	12
mus_retrom42575	1	0	0	1	0	1
mus_retrom62945	0	0	0	0	0	0
mus_retrom62946	6	1	0	0	0	51
mus_retrop111884	0	1	0	1	0	5
mus_retrom106466	26	11	1	6	0	4
mus_retrom61765	0	0	0	0	0	0
mus_retrop92077	0	0	0	0	0	0
mus_retrop69633	2	0	1	0	0	20
musiretrom08044	4	0	0	1	5	3
mus_retrom69416	1	0	0	0	1	2248
mus_retrom69414	452	111	1	0	0	2
musiretrom01639	0	0	0	0	0	0
mus_retrop95696	0	1	0	0	1	56
mus_retrop48597	9	7	2	5	4	4
mus_retrom48448	0	0	0	0	0	0
mus_retrop57053	0	0	0	0	0	0
mus_retrop52024	0	0	0	0	0	1
musiretrop14652	0	1	0	0	0	0
mus_retrop53997	0	0	0	0	0	3
mus_retrop53990	566	467	453	915	1130	1966
mus_retrom108301	0	0	0	0	0	0
mus_retrop49619	0	0	0	0	0	0
mus_retrom108303	9	2	0	0	0	1
mus_retrop94619	0	0	1	2	1	3
mus_retrop94617	0	0	0	0	0	0
mus_retrom108308	7	2	0	0	0	2
mus_retrop35386	0	0	0	0	0	0
mus_retrom124428	0	0	0	0	0	0
mus_retrom124427	267	0	1	3	0	34
mus_retrom124424	6	1	6	11	1	0
mus_retrop76001	0	0	0	0	0	0
mus_retrop53197	49	12	13	7	0	362
mus_retrom66384	0	0	0	0	0	0
mus_retrop101740	0	1	0	0	0	0
musiretrop01700	0	0	0	0	0	0
mus_retrop74353	20	3	3	1	2	46
mus_retrop74354	0	0	0	0	0	0
musiretrop01706	0	0	0	0	0	0
mus_retrop74359	1	0	2	0	0	1178
mus_retrop79209	8	4	7	7	6	6
mus_retrom72679	3	0	1	2	2	11
mus_retrom66807	0	0	0	0	0	0
mus_retrop79207	2	3	0	0	6	35
mus_retrom99435	0	0	0	0	0	0
mus_retrop79178	0	0	0	1	0	0
mus_retrom102210	6	2	1	0	4	5
mus_retrom102217	280	211	410	387	455	167
mus_retrom71890	0	0	0	0	0	2
mus_retrom71899	0	0	8	0	0	0
mus_retrom46986	0	0	0	0	0	0
mus_retrom38705	0	0	0	0	0	0
mus_retrop54979	0	0	0	0	0	1
mus_retrop97126	121	102	407	239	298	35
mus_retrop44239	7	1	4	6	3	3
mus_retrom50187	5	0	0	0	0	2
mus_retrop44234	208	72	59	233	210	196
mus_retrop46859	42	12	13	23	13	37
mus_retrop46509	0	0	0	0	0	0
mus_retrop46853	8	1	3	0	1	5
mus_retrop113130	4	1	2	3	0	2
mus_retrop49337	2	2	4	2	2	0
mus_retrom68763	2	1	0	1	0	0
mus_retrom68765	0	0	0	0	0	0
mus_retrom79666	34	0	2	4	11	8
mus_retrom43936	0	0	0	0	0	5
mus_retrom79661	13322	6078	5447	5949	6547	7285
mus_retrop42196	3	4	1	2	4	252
mus_retrop42195	0	0	0	0	0	58
mus_retrom107365	0	1	0	0	1	0
mus_retrop86297	0	0	0	0	0	0
musiretrom01837	0	0	0	0	0	0
mus_retrom44585	17	6	6	3	1	3
mus_retrom44580	6	0	1	1	0	0
musiretrom04533	6	2	0	1	0	1
musiretrop01963	0	0	0	0	0	0
mus_retrop54352	0	0	0	0	0	2
mus_retrop102241	14	9	13	7	13	3
mus_retrom60150	2	0	0	0	0	5
mus_retrop54359	0	1	3	1	0	1
mus_retrop73984	0	0	0	0	0	0
musiretrom13721	2	0	0	0	0	17
mus_retrop101968	0	0	0	0	0	0
mus_retrom69381	2	0	0	0	0	0
mus_retrom69387	4	1	0	0	0	35
mus_retrom68390	0	1	0	2	0	0
mus_retrom68396	50	13	11	13	16	28
mus_retrop65891	0	0	0	0	2	0
mus_retrop48060	6	4	1	0	0	2
mus_retrop69849	51	3	0	1	0	3
mus_retrop48064	6	5	19	13	4	16
mus_retrop73182	5	0	2	6	0	3
musiretrom29053	0	0	0	0	0	1
mus_retrop50504	0	0	0	0	0	52
musiretrom21215	283	73	71	76	1949	90
mus_retrop33361	0	0	0	0	0	0
mus_retrop74517	6	6	6	5	3	0
mus_retrop73234	163	117	41	59	71	48
mus_retrom49530	0	0	0	0	0	0
mus_retrop74519	0	0	1	0	0	0
musiretrom03960	8	0	2	0	1	9912
musiretrom39631	0	0	1	0	0	0
mus_retrom79895	0	0	0	0	0	0
mus_retrop70520	0	0	0	0	0	2
mus_retrom79893	0	0	0	0	0	2
mus_retrop70524	0	0	0	0	0	0
musiretrop38070	64	37	32	35	21	23
mus_retrop48455	137	21	7	22	11	37
mus_retrop48457	3	0	0	3	2	109
musiretrop07066	1	3	5	7	6	21
mus_retrop69750	4	0	0	0	0	0
mus_retrop57939	1	3	0	2	0	2
musiretrom41295	0	0	0	4	0	1
mus_retrop51905	0	0	0	0	0	0
mus_retrop74181	6	2	3	4	2	37
mus_retrop58536	4	0	0	1	1	10
mus_retrom99951	9	3	4	5	8	8
mus_retrop58534	0	0	0	0	0	0
mus_retrom58988	6	2	0	0	0	7
mus_retrom58989	5	2	0	1	0	1
mus_retrop49858	0	0	0	0	0	0
mus_retrop49855	11	3	7	9	19	2
mus_retrop58538	0	1	0	1	0	0
mus_retrop58539	1	1	4	1	0	43
mus_retrop92162	137	6	0	0	0	2
musiretrom22827	0	0	0	0	0	0
mus_retrom123903	696	352	281	524	283	252
musiretrom01799	0	0	0	0	0	0
mus_retrom123905	0	0	0	0	0	1
mus_retrom51005	6	0	1	4	2	0
mus_retrom109173	1	0	0	0	0	667
mus_retrom72313	1	0	0	0	0	0
mus_retrop92705	4	0	7	3	1	20
mus_retrop89874	2	1	1	0	0	0
mus_retrop92708	3	1	0	0	0	2
mus_retrom68956	2	5	1	0	2	9
mus_retrom123658	12	3	2	3	0	14
mus_retrom43743	1	2	0	0	0	1
mus_retrom66654	189	55	47	31	16	99
mus_retrop100352	0	0	0	0	0	1
mus_retrop100350	1	0	0	2	35	2
mus_retrop104323	0	1	1	0	0	0
mus_retrop104320	2	1	0	1	0	0
mus_retrop104327	5	0	0	0	9	16203
mus_retrom99609	2	0	0	0	0	1
mus_retrop114001	631	296	349	577	275	472
mus_retrom98606	0	0	0	0	0	2
mus_retrom99602	8	10	5	7	5	6
mus_retrom49472	36	18	10	3	3	11
mus_retrom98602	2	1	1	1	0	3
mus_retrop114009	6	3	1	1	0	3
mus_retrop114342	7	5	5	2	2	8
mus_retrom91461	1	1	0	0	0	1
mus_retrop59823	0	0	0	1	0	8
mus_retrop54500	0	0	0	0	0	0
mus_retrop59824	14	9	26	15	17	7
mus_retrop101008	15	3	2	0	6	2
mus_retrop101009	181	27	12	13	11	5
mus_retrom97605	7	6	19	5	22	91
mus_retrop101550	3	1	1	0	1	15
mus_retrop101003	10	0	7	1	0	0
mus_retrop104187	12	1	2	2	3	8
mus_retrop104182	0	0	0	4	1	2
mus_retrop104180	0	1	2	0	0	1
mus_retrom96801	9	0	2	0	1	14
mus_retrom49653	0	0	0	0	0	0
mus_retrop93200	6	1	0	0	0	6
mus_retrom102002	0	0	0	0	0	0
mus_retrom96928	0	0	0	0	0	0
mus_retrop45623	12	3	2	4	6	5
mus_retrop101532	4	0	1	2	0	3125
mus_retrop73759	0	0	0	0	0	0
musiretrom03148	1	0	0	2	0	2
mus_retrop100971	1	0	0	0	0	0
mus_retrom100614	4	0	0	0	0	3
mus_retrom67293	99	3	3	1	0	25
mus_retrop100975	10	1	2	0	7	4
mus_retrom67291	0	2	0	1	0	6
musiretrom07309	0	0	0	0	0	0
mus_retrop113582	2	1	0	1	0	6
musiretrom35397	0	2	0	0	0	0
mus_retrop113584	0	0	0	0	0	1
mus_retrom124933	3	0	0	3	2	4
mus_retrop73537	25	16	6	2	98	6
musiretrop10639	0	1	0	0	0	0
mus_retrom61966	12	3	3	7	1	5
mus_retrom32086	0	0	0	0	0	0
mus_retrop86624	3	1	0	0	2	0
mus_retrom80362	28	0	0	0	2	4331
mus_retrop58557	5	1	1	3	3	11
mus_retrom100745	9	2	1	0	1	42
mus_retrop44570	5	4	0	0	0	1
mus_retrop58050	17	2	1	3	0	5
mus_retrop50267	1	0	1	1	0	24
mus_retrom101928	3	1	6	3	4	0
mus_retrop112182	0	0	0	0	0	0
mus_retrop47904	0	0	0	0	0	1
mus_retrom46464	4	5	0	1	1	189
musiretrom33490	0	0	0	0	0	0
mus_retrom100521	0	0	0	0	0	0
musiretrom33499	0	0	0	0	0	30
mus_retrop50199	2	0	0	0	0	6
mus_retrop49627	1	0	0	0	0	32
mus_retrom62922	6	1	2	3	7	62
mus_retrop50192	0	0	0	1	0	0
musiretrom38112	0	0	0	0	0	6
musiretrop16677	1	0	0	0	0	0
musiretrop02843	0	0	0	0	0	0
musiretrom38118	0	0	0	0	0	2
musiretrop18639	8	8	0	0	0	0
musiretrom28988	0	0	0	0	0	6
mus_retrop69381	0	0	0	0	0	2
musiretrop08714	9	13	1	11	8	9
mus_retrom106804	5	0	0	0	0	0
mus_retrom48687	5	1	2	3	0	0
mus_retrom48466	2	2	3	5	0	56
mus_retrop52591	17	2	0	0	2	1
mus_retrop52598	6	1	0	0	0	1
mus_retrom123925	1	0	0	0	0	8
mus_retrom123922	79	34	34	35	20	41
mus_retrop92578	26	3	0	6	19	17010
musiretrom30276	0	0	0	0	0	6
musiretrom22362	11	4	2	4	2	1
musiretrop24598	0	0	0	0	0	0
mus_retrop94632	5	2	3	0	1	1
mus_retrop79047	0	0	0	0	0	3
mus_retrop79042	11	0	0	0	0	0
mus_retrom123228	3	0	2	1	0	5
musiretrop41960	3	0	0	0	0	0
mus_retrop76063	4	0	0	1	2	6
mus_retrom124113	0	0	0	0	0	2
mus_retrom124110	0	0	0	0	0	0
mus_retrom124447	0	0	0	0	0	0
mus_retrom124117	8	2	1	0	0	1
mus_retrom107695	0	0	1	0	1	0
musiretrop01761	0	0	0	0	0	10
musiretrop01760	0	0	0	0	0	25
mus_retrom108189	14	3	3	0	1	2
mus_retrom72694	0	0	0	0	0	0
mus_retrom99149	0	0	0	0	0	6
mus_retrop79592	4	3	5	5	3	6
mus_retrop79594	0	0	0	43	1	11
mus_retrom72692	3	2	0	1	1	69
mus_retrom72693	0	1	2	0	1	1
mus_retrom108988	0	0	0	0	0	6
mus_retrom99147	0	0	0	0	0	0
mus_retrop104043	0	0	0	0	0	0
mus_retrop71270	0	0	0	0	0	0
mus_retrop104045	0	0	0	0	0	0
musiretrop40782	1	0	0	0	1	3
mus_retrom41415	0	2	0	1	0	4
mus_retrop71487	110	24	5	3	2	34
mus_retrom41419	4	0	2	0	0	3
mus_retrop71480	1	1	0	2	1	23
mus_retrom67260	0	0	0	0	0	0
musiretrom25756	0	0	0	0	0	2
mus_retrop44746	10	3	1	2	3	6
mus_retrom96493	0	0	0	0	0	102
mus_retrom68748	2	1	0	0	0	11
mus_retrom68744	0	1	0	0	0	2
mus_retrom58739	2	1	0	1	0	1
mus_retrom58738	1	2	1	2	2	2
mus_retrop56845	1	1	1	0	0	0
musiretrom23187	21	4	1	1	1	8
mus_retrom69830	95	8	6	0	39	90167
mus_retrom107387	1	0	0	0	2	0
mus_retrom50250	1	0	0	0	0	3
mus_retrop86906	1	2	0	1	1	0
mus_retrop101941	0	0	0	0	0	0
mus_retrom50259	81	12	3	0	2	34
musiretrop01984	0	0	0	0	0	14
musiretrop01983	0	0	0	0	0	60
musiretrop01981	0	0	1	0	0	31
musiretrop01980	0	1	2	0	0	33
musiretrom39125	0	0	0	0	0	3
mus_retrop113112	0	0	0	0	0	0
mus_retrop54334	0	0	0	0	0	0
mus_retrop113114	0	0	0	0	2	0
mus_retrop102261	0	0	0	0	0	0
mus_retrop66196	0	0	0	0	0	0
musiretrop36109	0	0	0	0	1	2
mus_retrom101608	1	1	0	0	0	0
mus_retrom34713	0	0	0	0	0	0
mus_retrop112577	0	0	0	0	0	0
mus_retrop112573	2	7	3	3	1	2
musiretrom35893	0	0	0	0	0	0
musiretrom35892	0	0	0	0	0	1
mus_retrop93846	3	1	1	0	1	2
mus_retrop114663	1	0	0	0	0	2
mus_retrop114664	49	6	0	0	0	0
mus_retrop55004	0	0	1	0	0	2
mus_retrop55007	8448	3581	894	1077	968	1518
musiretrop08384	0	1	0	0	0	1
musiretrop26053	0	0	0	0	0	0
musiretrop26051	0	0	0	0	0	0
musiretrop26057	0	0	0	0	0	0
musiretrop26054	0	0	0	0	0	0
musiretrop26055	0	0	0	0	0	0
mus_retrop73258	32	0	0	0	0	5
mus_retrom91256	3	0	2	1	0	0
musiretrop42234	0	0	0	0	0	0
mus_retrop70504	10	2	0	1	1	24
mus_retrop70058	1	3	8	1	0	7
mus_retrop74617	1	0	0	0	0	3
mus_retrop74610	3	1	0	3	0	5
mus_retrop74618	0	0	0	0	0	0
mus_retrom73319	0	0	0	0	0	0
mus_retrom73648	0	1	0	0	0	0
mus_retrom107542	0	0	0	0	0	2
mus_retrom100266	0	0	0	0	1	1
mus_retrom100267	0	1	0	0	0	0
mus_retrop52968	378	423	564	627	474	265
mus_retrom93542	0	0	0	0	0	0
mus_retrom99970	0	0	0	0	0	5
mus_retrop58552	4	0	0	0	0	44
mus_retrop91143	8	0	0	1	0	18
mus_retrop49871	0	0	4	1	0	1
mus_retrop49875	0	1	0	0	0	0
mus_retrom41645	2	1	0	1	0	1
mus_retrom125184	2	0	0	0	0	2
mus_retrop92497	0	0	2	1	0	0
mus_retrom107608	0	0	0	0	0	10
mus_retrom125188	73	3	57	18	121	7
mus_retrom103518	3	0	0	0	0	1
mus_retrop69657	3	1	2	2	7	0
mus_retrom103511	0	0	0	0	0	0
mus_retrop114322	1	0	0	0	0	2
mus_retrom48896	4	0	0	0	0	3
musiretrom01775	0	0	1	0	0	45
mus_retrom48894	10	0	1	3	3	1
mus_retrop39649	0	0	0	0	0	0
mus_retrom109118	4	0	0	0	1	5
mus_retrom124325	1	0	1	0	0	0
mus_retrom109116	0	0	0	0	0	0
mus_retrom109115	0	0	7	0	0	1
mus_retrop95710	0	1	0	4	0	0
mus_retrom123929	8	0	0	0	5	21109
mus_retrom121740	2	0	0	0	0	15
musiretrom09018	1	0	0	0	0	1
mus_retrom121744	1	4	0	0	1	14
mus_retrom121746	3	2	1	2	2	0
musiretrop06358	0	0	0	0	1	1
mus_retrop103970	1	0	2	0	0	1
mus_retrom79413	54	24	25	25	21	16
mus_retrom79416	0	0	0	0	0	2
mus_retrom69629	1	2	1	6	3	4
mus_retrop112894	3	0	0	0	0	12
mus_retrop100371	3	0	0	0	1	0
mus_retrom40661	52	26	21	15	6	1
mus_retrom99621	0	0	0	0	0	0
mus_retrop114068	17	10	9	8	13	10
mus_retrom49411	0	0	0	0	0	6
mus_retrom49416	0	0	0	0	0	0
mus_retrop54525	0	2	1	2	0	0
mus_retrop54527	0	0	0	0	0	0
mus_retrop54520	1	1	0	0	0	4
mus_retrom102391	0	0	0	0	0	0
mus_retrom102392	0	0	0	0	0	0
mus_retrop95869	57	20	36	23	6	1
mus_retrop101536	0	0	0	0	0	0
mus_retrop101020	10	1	0	1	1	5623
mus_retrom45949	0	0	0	0	0	0
mus_retrom50733	0	0	0	0	0	0
mus_retrop92728	74	69	193	95	44	176
mus_retrom58505	6	2	1	9	3	83
mus_retrop54782	12	6	13	12	10	20
mus_retrop73884	2	1	0	1	0	1
mus_retrom122983	65	10	2	7	11	280
mus_retrom50085	3	0	0	2	0	3
mus_retrom99082	5960	2279	1733	1998	1409	1209
mus_retrom50080	6	0	1	3	1	22
mus_retrom50089	253	138	282	153	147	184
musiretrom07320	0	0	0	0	1	335
mus_retrom91448	0	0	0	0	0	0
mus_retrom91449	1	0	0	0	0	3
mus_retrom124918	2	0	0	0	0	1
mus_retrop73081	0	0	0	0	0	0
mus_retrop66506	2	0	0	0	0	0
mus_retrop113564	3	0	0	1	0	12
mus_retrop66500	3	0	0	0	0	0
mus_retrom124915	1	0	0	0	0	0
mus_retrom96531	0	2	0	0	1	12
mus_retrom46250	0	0	0	0	0	0
mus_retrop58319	1	0	0	0	1	1
mus_retrom91628	5	1	2	1	1	17
mus_retrom91623	0	0	0	0	0	0
mus_retrop98627	0	0	0	0	1	5
musiretrop32342	0	0	0	0	0	2
musiretrop32341	0	0	0	0	0	0
musiretrop32340	0	0	0	1	0	0
mus_retrop113304	2687	984	1164	204	106	3994
mus_retrom40891	7	3	6	3	4	4
mus_retrom100895	0	0	0	0	0	1
mus_retrom100722	10	4	4	4	4	33
mus_retrom100729	1	0	1	0	0	12
mus_retrop44326	1	2	0	1	0	0
mus_retrop89795	0	0	1	1	1	1317
mus_retrop89797	0	0	0	0	0	0
musiretrop32160	8	0	1	3	2	1
mus_retrom42047	0	0	0	0	0	0
mus_retrom100099	20	0	0	1	12	38379
mus_retrop49608	5	0	3	2	4	0
mus_retrom68212	0	0	0	0	0	0
mus_retrom68210	0	0	0	0	0	0
mus_retrom98024	13	2	2	2	2	4
mus_retrop69415	2	0	2	1	0	4
mus_retrom80307	1	0	1	25	0	0
musiretrom34137	0	0	0	0	0	0
mus_retrop95520	1	0	0	2	0	0
mus_retrop91008	2	1	1	1	0	0
mus_retrop52389	8	0	2	3	1	0
mus_retrop59781	1	0	0	0	0	1
mus_retrom101410	0	0	1	0	0	1
mus_retrom65721	5	4	4	0	0	1
mus_retrop106759	0	0	0	0	0	0
mus_retrom48664	1	0	0	2	0	6
mus_retrom48662	1	0	0	0	2	5
mus_retrom93487	4	0	1	0	2	9
mus_retrop46152	2	0	1	0	0	0
mus_retrop73576	33	12	6	18	3	26
mus_retrom48669	2	1	1	3	2	3
mus_retrop111956	9	0	0	0	0	2
mus_retrom72858	2	1	1	1	0	2
mus_retrop48801	0	0	0	0	0	0
mus_retrop65680	8	11	4	6	8	5
musiretrop22745	3	1	0	0	0	3
mus_retrop91605	3	3	3	1	0	8
mus_retrop95381	2	0	1	2	4	17
mus_retrom40781	0	0	0	6	2	5
mus_retrop70269	0	0	0	0	0	0
mus_retrop70265	2	2	1	2	2	67
mus_retrop70266	13	4	3	6	4	12
mus_retrop70260	0	0	0	0	1	2
mus_retrop96875	39	53	50	21	32	9
mus_retrop71244	2	0	0	0	0	49
mus_retrom108438	6	2	1	1	0	0
mus_retrom108430	4	2	1	2	5	0
mus_retrop78999	9	7	16	7	4	1
mus_retrom72505	22	6	1	0	2	1
mus_retrom96985	1	0	0	0	0	0
musiretrom09754	1	1	0	0	0	3
mus_retrop53154	1	0	0	0	0	4
mus_retrop53156	0	0	0	0	0	1
mus_retrop53159	0	0	0	0	0	1
mus_retrom124461	8	3	10	5	2	4
mus_retrop74394	2	0	0	0	1	2
mus_retrop74390	16	11	7	11	15	57
mus_retrom97471	0	0	0	233	1	5
mus_retrop101700	0	0	0	0	0	0
mus_retrom99164	0	0	0	11	0	0
mus_retrom96700	0	1	0	0	0	0
mus_retrom96703	7	0	0	0	0	4
mus_retrop53847	2	0	0	1	1	5
mus_retrom49750	4	0	3	1	0	12
mus_retrop49046	2	0	2	1	1	1476
mus_retrop104062	6	0	2	3	1	8
mus_retrop44836	0	1	1	0	0	1
mus_retrom66598	2	0	0	0	0	2
mus_retrop48541	3	0	0	0	0	2
mus_retrop44831	2	1	2	3	1	2
mus_retrom66592	25	4	2	3	3	18
mus_retrop44839	0	0	18	0	0	1
mus_retrom123449	2	0	0	0	0	10
mus_retrop65637	262	44	23	1	1	13
mus_retrop46899	10	7	4	3	4	10
mus_retrop96127	37	4	7	10	7	8
mus_retrop100106	0	0	0	0	0	3
mus_retrom58717	5	0	0	1	0	4
mus_retrom123117	0	0	0	0	0	0
mus_retrop73087	0	0	0	0	0	0
mus_retrop56864	1	1	0	1	1	0
mus_retrom69810	36	19	3	5	0	5
mus_retrom69819	0	1	0	0	0	1
mus_retrop66501	6	2	4	4	3	2
musiretrom24281	1	0	0	1	0	1
mus_retrop44762	22	18	22	25	40	18
mus_retrom31922	0	0	0	0	0	0
mus_retrop48025	5	4	1	4	3	28
mus_retrop48027	196	81	82	27	19	14
mus_retrop98210	1	0	0	0	0	0
mus_retrop44494	0	2	0	1	0	24
mus_retrop86920	29	1	1	0	2	11
musiretrom30629	0	0	0	0	0	0
mus_retrop73271	0	1	0	0	0	1
mus_retrop74556	0	0	0	0	0	0
mus_retrop73275	34	1	0	0	0	0
mus_retrop100671	0	0	0	0	0	0
mus_retrop113793	12	4	5	10	15	68
musiretrop03875	0	0	0	0	0	0
musiretrop03874	0	0	0	0	0	0
musiretrop03877	0	0	0	0	0	0
musiretrop03876	0	0	0	0	0	0
musiretrop03873	0	0	0	0	0	0
musiretrop03872	0	0	0	0	0	0
mus_retrop70073	1	0	3	2	0	2
mus_retrop70074	16	4	55	15	8	77
musiretrom40537	4	1	1	1	1	2
musiretrop07021	1	0	1	1	1	1
mus_retrom42492	2	0	0	0	1	0
mus_retrom95390	0	2	0	0	0	11
mus_retrom95423	3	6	4	4	3	20
mus_retrom44634	4	1	2	4	5	10
mus_retrom95429	0	0	1	3	5	64
mus_retrom90616	13	0	0	2	0	3
mus_retrop51940	0	0	0	0	0	0
mus_retrop51942	1	0	0	0	11	17296
mus_retrom100284	10	5	0	0	0	3
mus_retrop47710	4	0	1	0	1	10
mus_retrom97865	0	1	0	0	0	0
mus_retrom100903	0	1	1	0	0	6
mus_retrom99997	0	0	0	0	0	5
mus_retrop58570	21	6	0	8	8	14
mus_retrop58577	0	0	0	0	0	43
mus_retrom69253	0	0	0	0	0	0
mus_retrop49814	4	4	0	0	0	336
mus_retrom62041	8	2	2	3	1	1
mus_retrop71656	3	4	2	1	2	8
mus_retrop64015	3	0	5	1	1	6
mus_retrop91298	0	0	0	0	0	0
mus_retrop95263	0	0	3	1	0	0
mus_retrop91291	1	2	0	0	0	0
mus_retrop91293	3	2	3	0	0	3
mus_retrop91296	116	19	0	5	0	194
mus_retrom121764	0	0	0	0	0	62
mus_retrom121762	55	2	0	0	0	28
musiretrop01680	0	0	0	0	0	0
musiretrop01681	0	0	0	0	0	0
mus_retrom79437	207	139	111	286	120	27
musiretrop01683	0	0	0	0	0	9
mus_retrop103919	335	39	32	168	200	219
mus_retrop114045	67	1	1	1	5	75
mus_retrop103914	0	0	0	0	0	0
mus_retrop114049	11	1	0	0	0	11
mus_retrop103912	4	1	0	0	0	4
mus_retrop52410	308	152	29	65	34	39
mus_retrom66163	0	0	0	0	0	0
mus_retrop52419	15	4	1	3	0	0
mus_retrom100727	6	3	2	2	3	2
mus_retrom108080	0	0	0	1	6	1
mus_retrop92122	1	0	0	0	0	4128
mus_retrop92126	4	0	0	0	0	0
mus_retrop92124	0	0	0	0	0	0
mus_retrom97649	3	1	0	0	1	1
mus_retrop114308	0	0	0	0	0	0
mus_retrom97643	50	18	5	0	14	48848
mus_retrop114307	378	103	230	137	58	2051
mus_retrom97130	38	6	8	7	11	30
mus_retrop114303	0	0	0	0	0	0
musiretrom23082	9	0	1	0	1	5
mus_retrom45925	0	1	0	0	0	81
mus_retrop91836	1	0	1	2	1	2
mus_retrop91832	5	0	0	0	3	11353
mus_retrom50864	88	39	0	0	0	0
mus_retrom103393	92	3	9	15	5	80
musiretrop30459	9310	2941	1362	1243	1052	1575
mus_retrom71994	2	2	0	0	0	7
mus_retrom124703	0	1	0	0	0	0
mus_retrop97730	0	0	0	0	0	1
mus_retrop98171	0	1	1	1	0	1
mus_retrom66787	0	0	1	0	0	0
mus_retrom42864	0	0	0	0	0	119
mus_retrom106287	13	7	17	12	6	0
mus_retrop79657	5	1	4	2	7	2
mus_retrom108857	20	3	6	2	4	3
mus_retrom72713	0	0	0	0	1	0
mus_retrop101043	0	1	2	0	0	0
mus_retrop100936	0	0	0	0	0	0
mus_retrop100933	5	0	3	2	1	327
mus_retrom98915	23	6	1	4	3	5
mus_retrop46343	4	2	0	0	0	1
mus_retrop113543	19	5	5	7	7	7
mus_retrom82581	1	0	0	1	0	1
mus_retrom61920	1	0	0	1	0	0
mus_retrop102540	2	1	2	0	1	1
musiretrom12606	0	0	0	0	0	2
mus_retrom96517	1	3	1	3	1	7
mus_retrom105578	0	0	0	0	1	0
musiretrop36860	0	0	0	0	0	1
mus_retrom105572	0	0	1	0	0	0
mus_retrom105575	0	0	0	0	0	0
mus_retrom105577	0	0	0	0	0	0
mus_retrop113323	0	0	0	1	0	58
musiretrop03688	0	0	0	0	0	0
mus_retrop113897	34	22	17	27	10	271
mus_retrop44535	1	0	1	0	0	3
mus_retrop113329	1	0	0	0	0	0
mus_retrop113899	5	8	3	4	0	40
musiretrop02518	37	3	0	0	0	99
mus_retrom41124	0	0	0	0	0	1
mus_retrop50220	15	17	11	7	4	0
musiretrop01829	0	0	0	0	0	1
mus_retrom44403	0	0	0	0	0	1
musiretrop15048	6	0	1	0	0	5
mus_retrom60034	8	8	0	1	0	0
mus_retrom60030	6	1	2	1	1	2
mus_retrop49669	0	0	0	0	0	0
mus_retrop49663	3	8	20	3	4	0
mus_retrom98001	0	0	0	0	0	9
mus_retrop92068	7	0	0	0	0	2
mus_retrop93195	1	0	0	0	0	0
mus_retrom80325	7	0	0	1	3	3201
musiretrom13516	0	0	0	0	0	0
mus_retrop112057	2	1	4	4	6	12
mus_retrom66786	0	0	0	0	1	0
mus_retrom95891	6	2	1	0	2	5
mus_retrop50486	1	0	1	3	3	1
musiretrop33096	1	0	0	0	0	1
mus_retrop50481	0	1	1	0	0	3
mus_retrop59764	0	1	0	0	1	0
mus_retrom79997	4	1	0	0	0	2
mus_retrop47940	0	0	0	0	0	1
mus_retrop52880	16	3	0	4	1	2
mus_retrop52885	3444	639	487	428	381	34213
musiretrop25179	0	0	0	0	0	0
mus_retrop55212	0	1	0	0	1	5
mus_retrom106847	0	0	0	0	1	1
mus_retrop48825	11	2	0	1	1	53
mus_retrop48531	1	1	0	0	0	0
mus_retrop48538	1	1	0	0	0	0
mus_retrop91628	12	20	2	0	3	0
mus_retrop110773	21	10	15	7	4	0
mus_retrom123574	2	1	0	1	0	109
musiretrom32412	0	0	0	0	0	0
mus_retrop96763	1	0	0	1	0	0
mus_retrop70240	0	0	0	0	0	2
mus_retrop96813	383	30	45	39	54	93
mus_retrop74005	0	0	1	0	0	0
mus_retrop35893	0	0	0	0	0	0
mus_retrom73121	0	0	0	0	0	0
mus_retrom73124	17	1	7	0	1	24
mus_retrom48647	3	0	1	0	4	6765
mus_retrom48640	0	0	0	0	0	0
mus_retrom92260	0	0	0	0	0	0
musiretrop41845	0	0	1	0	0	2
mus_retrop56748	2	3	1	1	1	7
mus_retrop56746	18	10	10	8	5	3
mus_retrop100234	11	2	13	3	4	4
mus_retrop52089	0	1	0	0	1	0
mus_retrom48429	32	17	33	42	34	29
mus_retrop101724	2	0	1	1	0	19
mus_retrop53865	1	0	0	0	0	2
mus_retrom68837	2	3	0	2	0	17
mus_retrop104007	23	12	0	0	0	0
mus_retrop100055	0	0	0	0	0	0
musiretrop13061	0	0	0	0	0	0
musiretrom36220	2	0	0	0	1	2
mus_retrop69419	2	1	0	1	0	2
musiretrom25841	0	1	0	0	0	35
mus_retrom66577	0	0	0	1	0	0
mus_retrom66571	0	0	1	0	0	3
mus_retrom43888	2	0	0	0	0	0
mus_retrom107032	0	0	0	0	0	0
mus_retrom72520	1031	255	113	111	96	462
mus_retrop101189	0	0	0	0	0	0
mus_retrop49397	331	13	0	0	0	1
mus_retrom123134	6	1	0	0	2	2
mus_retrop78717	0	0	3	2	0	2
mus_retrop52628	0	0	0	0	0	0
mus_retrop87018	5	3	0	0	0	1
mus_retrop52624	0	0	0	0	0	0
mus_retrop87013	49	5	1	0	0	0
mus_retrom66317	1	0	0	0	0	0
mus_retrom96725	4	0	1	1	2	7
mus_retrom96722	0	0	0	0	0	0
mus_retrop101981	0	0	0	0	0	0
mus_retrop54667	0	0	0	0	0	0
mus_retrop93088	0	1	0	0	0	28
mus_retrop93084	1	0	1	1	0	4
mus_retrop51853	0	0	0	0	31	0
mus_retrop88779	0	0	0	0	0	0
mus_retrom58887	0	0	1	0	0	0
mus_retrop99908	2	0	0	0	0	1
mus_retrop99903	0	0	0	0	0	0
mus_retrop44707	26	1	0	1	0	31
mus_retrop101064	0	0	0	0	0	0
mus_retrom101862	5	2	4	1	1	4
mus_retrop112204	3	0	1	0	0	0
mus_retrom50295	6	1	4	5	5	17
mus_retrom50292	37	6	13	5	6	26
mus_retrom67046	3	0	0	0	0	2
mus_retrom67043	0	2	0	3	0	1
mus_retrop102375	4	1	0	2	0	4
mus_retrom70030	111	3	0	0	1	1834
mus_retrop66040	0	0	0	0	0	0
mus_retrop114111	972	55	29	42	12	709
musiretrop03892	4	0	0	3	1	4
mus_retrom49527	0	0	0	1	0	0
mus_retrop65969	0	0	0	0	0	0
mus_retrop65784	1335	66	45	28	15	120
mus_retrop65787	10	1	0	0	0	2
mus_retrom80049	2	0	0	1	0	1
mus_retrop65961	6	1	0	0	0	4
mus_retrom80040	39	0	1	2	3	16
mus_retrom100115	0	2	0	0	0	3
mus_retrop94088	0	0	0	0	0	2
mus_retrop94089	13	3	0	0	0	22
mus_retrom95408	0	0	0	2	0	1
mus_retrom95401	0	0	0	0	0	2
mus_retrom44619	8	3	3	8	1	2
musiretrop33936	0	0	0	0	0	0
musiretrop33935	0	0	0	0	0	0
mus_retrom44612	0	1	0	0	0	5
mus_retrom44617	15	13	16	118	768	4
mus_retrom107587	9	4	0	0	0	20
mus_retrop47084	7	0	0	0	0	9
mus_retrop94881	0	0	0	0	0	5
mus_retrom61441	4	0	1	1	1	4
mus_retrom61440	12	14	3	8	5	58
mus_retrom69274	2	0	0	1	0	8
mus_retrom69270	0	0	0	0	0	0
mus_retrop49834	1	0	0	0	0	1
mus_retrop49833	2	0	0	0	0	0
mus_retrom69279	1	2	1	0	0	0
mus_retrom68006	0	1	0	0	0	0
mus_retrom97533	17	0	1	2	1	7
mus_retrom68000	0	0	0	0	0	4
mus_retrop70015	0	1	0	1	3	0
musiretrop13650	27	5	2	1	3	348
mus_retrop99488	0	0	0	0	0	0
mus_retrom72952	14	3	0	4	0	8
musiretrom09501	0	1	2	3	1	2
mus_retrom90635	3	1	1	0	0	17
mus_retrom40622	1	2	3	4	1	1
mus_retrom34271	0	0	0	0	0	0
mus_retrop112858	5	1	4	1	6	7
mus_retrop92100	1	0	0	0	0	0
mus_retrom106670	32	28	23	17	8	17
mus_retrom45908	1	0	0	1	0	1
mus_retrom48368	1	0	0	0	0	0
mus_retrop93273	2	0	0	0	0	0
mus_retrom48362	1	0	0	1	0	10
mus_retrop91817	0	0	0	0	0	0
mus_retrom59413	6	2	2	3	0	23
mus_retrop91813	2	1	0	0	0	0
mus_retrop95825	5	1	0	0	0	7
mus_retrom59418	24	1	16	7	11	4
mus_retrom51154	0	0	0	0	0	22
mus_retrom71976	0	0	0	0	0	13
mus_retrop100915	8	4	2	2	0	4
mus_retrom124722	0	0	0	0	0	0
mus_retrom50597	7	2	0	0	0	2
mus_retrom50596	0	0	0	0	0	4
musiretrom41445	0	0	0	0	0	14
mus_retrom44059	0	0	0	0	0	33
musiretrom41448	88	3	0	0	0	257
mus_retrom44054	12	0	4	3	7	478
mus_retrom41573	0	0	0	0	0	0
mus_retrom41571	0	1	0	0	2	1
mus_retrom91409	0	0	0	0	0	0
mus_retrop66234	14	10	1	5	4	3
mus_retrop66231	8	9	0	0	4	97
musiretrom30830	10	1	4	1	0	20
mus_retrom105370	0	0	0	0	0	0
mus_retrom32025	0	0	0	0	0	0
mus_retrom96573	0	0	0	1	1	0
mus_retrom96577	0	0	0	0	0	0
mus_retrom49014	4	0	3	4	2	2
mus_retrop86682	26	1	6	2	3	11
mus_retrom96578	0	0	0	0	0	1
mus_retrom49010	0	0	0	0	0	0
mus_retrom50684	0	0	0	1	0	1
mus_retrom68640	0	0	0	0	0	33
mus_retrom68643	4	0	0	3	0	2
mus_retrom123093	7	5	0	0	0	0
mus_retrop90995	2	0	0	0	0	40
mus_retrom105515	0	0	0	0	0	0
mus_retrop90990	39	4	0	3	0	1
mus_retrom44427	6	0	2	2	1	2
musiretrop01806	0	0	0	0	0	0
musiretrop01807	0	0	0	0	0	0
musiretrop01804	0	0	0	0	0	0
musiretrop01805	0	0	0	0	0	1
musiretrop01802	0	0	0	0	0	2
musiretrop01803	0	0	0	0	0	0
musiretrop01800	0	0	0	0	0	1
musiretrop01801	0	0	0	0	0	35
musiretrop01808	0	0	0	0	0	0
musiretrop01809	0	0	0	0	0	0
mus_retrop73598	1	0	0	0	0	2
musiretrom13688	4	0	0	0	0	30
mus_retrop36308	0	0	0	0	0	0
mus_retrop73597	0	0	0	0	0	1
mus_retrom69062	15	1	4	0	0	0
mus_retrom69060	4	0	0	0	0	102
mus_retrom69064	0	0	0	0	0	4
musiretrop03405	1615	492	225	759	824	4409
mus_retrop102747	0	4	3	6	1	1
mus_retrop114724	1	0	0	0	0	0
mus_retrop54121	68	33	36	39	31	39
mus_retrom98068	1	0	0	0	0	0
mus_retrop54127	0	0	1	1	5	0
musiretrop37579	7	2	0	0	0	1
musiretrop37576	1	5	0	1	0	1
mus_retrop112076	62	6	0	0	0	12
mus_retrom100585	0	0	0	0	0	0
mus_retrop74459	34	0	4	7	3	23
mus_retrop74453	118	67	5	7	3	137
musiretrop26171	13	1	2	0	0	1
mus_retrop47964	1	1	0	0	1	1
mus_retrop57964	11	0	1	4	1	8
mus_retrop47960	7	0	2	3	2	11
mus_retrop50600	12	0	2	1	0	4
musiretrop42391	0	0	0	0	0	0
mus_retrom106861	17	1	0	1	1	3
mus_retrop111913	0	0	0	0	0	1
mus_retrop48516	23	19	1	0	0	338
mus_retrop94472	1	0	0	0	0	0
mus_retrop94474	30	1	2	1	2	21
musiretrom32438	0	0	0	0	0	0
mus_retrom108474	1	3	2	3	1	2
mus_retrom123938	20	14	5	0	4	119
musiretrom32432	0	0	0	0	0	0
musiretrom32433	0	0	0	0	0	0
musiretrom32436	0	0	0	0	0	0
musiretrom32435	0	0	0	0	0	0
mus_retrop70222	6	0	1	2	0	354
mus_retrom48887	0	0	0	0	0	0
mus_retrop92556	1	0	3	1	1	14
mus_retrop66843	0	0	1	0	1	1
mus_retrom73146	0	1	1	0	0	0
mus_retrop94698	2	1	0	1	1	0
mus_retrom107443	1	1	0	1	0	0
mus_retrop87398	0	0	1	0	0	0
mus_retrop58437	2	1	2	1	3	2
mus_retrom48621	1118	369	505	94	20	134
mus_retrom99812	0	1	0	0	1	2
mus_retrom42280	0	0	0	0	0	48
mus_retrop53111	5	0	1	0	2	0
mus_retrom90862	19	3	0	1	4	98
mus_retrom90864	9	0	0	0	0	2
mus_retrop100217	0	0	0	0	0	0
mus_retrop100214	0	1	0	0	0	10
mus_retrom90868	0	0	0	0	0	1
mus_retrom109073	0	0	0	0	0	0
mus_retrom109078	1	0	0	0	0	3
mus_retrop80813	0	2	0	0	0	2
mus_retrom42130	13	18	2	6	1	1
mus_retrom44199	1	1	0	0	0	16
mus_retrop92840	5	7	4	1	1	35
mus_retrop92665	0	2	1	0	2	2
mus_retrop92666	5	15	0	0	0	4
mus_retrop92661	8	10	5	6	5	15
mus_retrop71179	11	4	0	1	2	5
mus_retrom46904	0	0	0	0	0	1
mus_retrop104240	1	0	0	2	2	2
mus_retrop99678	0	0	0	0	0	0
mus_retrop104246	3	0	0	1	0	0
mus_retrop44872	24	1	1	4	4	16
mus_retrop104248	5	1	2	2	3	0
musiretrom18411	0	0	0	0	0	49
mus_retrom72541	7	0	0	1	0	6
mus_retrom108342	4	1	1	2	0	4
mus_retrom72545	0	0	0	0	0	2
mus_retrop79060	0	0	0	0	0	0
mus_retrop54461	0	0	0	0	0	11
mus_retrop104023	0	1	0	0	0	0
mus_retrom69851	10	3	41	3	1	33
mus_retrop103961	0	0	0	0	0	0
mus_retrom96741	0	0	0	10	102	3
mus_retrom96742	0	0	0	1	0	0
mus_retrom102162	0	0	0	0	0	5
mus_retrom102164	1	0	0	0	0	1
mus_retrom102168	0	0	0	0	0	0
mus_retrop101303	0	0	0	0	0	0
mus_retrop44722	2	4	1	8	0	2
musiretrom25733	0	0	0	0	0	0
mus_retrop44728	1	0	0	5	0	1
musiretrom35833	0	0	0	0	0	0
musiretrom35831	0	0	0	0	0	0
mus_retrop98255	1	0	0	0	0	43
mus_retrom101841	0	0	0	0	0	0
mus_retrom101840	4	2	2	6	0	1
mus_retrom67068	0	0	1	4	0	0
mus_retrop86964	0	0	1	1	0	1
mus_retrom67066	0	0	0	0	0	0
mus_retrom70050	22	1	3	6	5	11
mus_retrom70053	9	5	0	0	3	17292
mus_retrom70057	15	3	3	8	6	8
mus_retrop66061	5	0	1	1	1	5
musiretrop04379	11	8	1	0	0	51
mus_retrop44186	1	0	0	0	2	9
mus_retrop44184	0	0	1	0	0	1
mus_retrop67380	0	0	0	0	0	4
mus_retrop65905	3	0	2	1	0	0
mus_retrom46740	1	0	0	0	1	0
mus_retrom73626	1	0	0	0	0	5
mus_retrom46295	88	64	1	1	0	50
mus_retrom73628	0	0	0	0	0	3
mus_retrom95468	522	30	0	11	4	736
mus_retrom95466	0	1	0	0	0	0
mus_retrom65765	20	1	0	0	1	0
mus_retrom44674	3	5	1	1	0	0
musiretrop29136	76	29	7	13	3	134
mus_retrom46122	0	0	0	0	0	0
mus_retrom61426	0	1	0	0	0	0
musiretrom33648	1	0	1	1	0	5
mus_retrop39442	0	0	0	0	0	0
mus_retrom58904	0	0	0	0	0	0
mus_retrom58905	0	0	0	0	0	0
mus_retrom58907	29	26	23	31	29	228
musiretrom28822	0	1	1	0	0	17
musiretrop19730	0	0	0	0	0	5
mus_retrom74822	0	1	0	0	0	0
mus_retrop112488	0	1	1	0	1	0
mus_retrom109241	1	0	0	0	0	0
mus_retrom79818	18	4	7	4	8	11
musiretrom08434	4	0	0	0	2	0
mus_retrop71616	23	4	5	2	5	14
musiretrom01712	0	0	0	0	0	0
mus_retrom72971	0	0	0	0	0	0
mus_retrop54534	1	0	0	0	1	4
mus_retrom72978	2	1	8	5	2	13
mus_retrop54535	0	0	0	0	0	1
mus_retrom74753	0	1	0	0	0	0
mus_retrom74751	3	0	0	0	0	1
mus_retrom74750	23	7	4	7	12	17
mus_retrop48985	61	18	8	3	0	1
mus_retrop112875	1	0	0	0	0	0
mus_retrop114088	2	0	0	0	2	9
mus_retrop112876	5	3	0	0	0	37
mus_retrop114084	0	0	0	0	0	0
mus_retrop91787	0	1	1	0	0	1
mus_retrom40601	12	4	3	2	1	14
mus_retrom50927	6	0	0	0	1	0
mus_retrom50920	3	0	1	1	0	17
mus_retrom108040	0	0	0	0	0	1
mus_retrom97170	5	1	3	3	15	3
mus_retrom97172	0	0	0	0	0	12
mus_retrom48384	5	1	1	0	0	226
mus_retrom124290	42	0	1	1	0	30
mus_retrop95806	21	6	0	6	1	6
mus_retrom72282	6	2	2	7	9	1
mus_retrom96889	5	0	0	0	0	458
mus_retrop74270	0	1	0	0	1	1
mus_retrop74275	1	0	0	0	0	2
mus_retrop74278	15	1	2	1	1	14
mus_retrom124748	0	0	0	1	0	2
mus_retrop79610	20	2	9	0	3	3839
musiretrom15862	0	0	0	0	0	2
mus_retrom49386	2	4	0	0	1	8
musiretrom15861	0	0	1	0	0	3
mus_retrom41552	103	4	7	25	30	75
mus_retrom41555	3	0	0	1	0	2
mus_retrop54855	1	0	0	2	1	57
mus_retrom50723	0	0	0	0	0	0
mus_retrop44356	5	2	1	0	2	2
musiretrom20249	0	0	0	0	0	0
mus_retrom96223	6	3	9	5	4	1
musiretrop32011	0	0	0	0	0	0
mus_retrom96385	4	0	0	1	0	1
mus_retrop113508	0	0	1	0	0	0
mus_retrom99243	0	0	0	0	0	0
mus_retrom49030	146	124	19	36	40	34
mus_retrom99248	5	6	1	3	0	8
musiretrop24870	0	0	0	0	0	0
mus_retrop113055	3	0	0	1	0	0
mus_retrop46241	12	1	3	3	0	2
mus_retrop46932	14	8	4	8	2	6
mus_retrom122965	0	0	0	1	1	3
mus_retrom122966	3	4	1	0	0	5
musiretrom23436	3	2	2	5	1	15
mus_retrom91686	1	0	0	1	0	1
mus_retrop97958	0	0	0	0	0	0
mus_retrop73820	2	5	1	2	2	14
mus_retrom50319	0	1	0	1	1	4
mus_retrop90206	0	0	0	0	0	0
mus_retrom123214	0	0	0	0	0	0
mus_retrom105535	0	0	0	0	5	0
mus_retrom105534	0	0	0	1	0	0
mus_retrom44441	5	0	0	43	12	2
mus_retrom41164	2	0	0	1	1	0
mus_retrom44446	0	0	0	0	0	0
mus_retrop102506	0	0	1	1	0	1
mus_retrop102502	0	0	0	0	0	0
mus_retrop74439	1	0	0	0	0	4
mus_retrom81987	20	6	28	5	10	34
mus_retrop75872	13	5	9	3	6	7
mus_retrom69040	0	0	0	0	0	59
mus_retrom69042	8	6	1	3	3	16
mus_retrom69500	0	0	0	0	0	0
mus_retrom124712	1	0	0	0	1	0
mus_retrom98045	104	49	36	49	32	84
mus_retrom98047	0	0	0	0	1	5
mus_retrom98041	0	0	0	0	0	2
mus_retrom91023	37	10	2	15	5	16
mus_retrom100833	15	20	35	12	8	1
mus_retrom70133	6	3	3	2	2	10
mus_retrop48167	7	1	1	2	0	0
mus_retrop114705	10	1	2	0	10	29812
mus_retrop93922	1	0	0	1	0	4
mus_retrom100838	3	0	0	2	2	13
musiretrop36355	1	0	2	1	1	3
musiretrop36604	23	2	3	4	1	0
mus_retrom95856	1	2	0	1	1	101
mus_retrop73724	0	0	0	1	0	1
mus_retrop59720	5	3	0	27	0	0
mus_retrop74470	7	1	1	1	1	6
musiretrop26110	0	0	0	0	0	0
musiretrop26117	0	0	0	0	0	0
musiretrop33272	0	0	0	0	0	3
musiretrop33273	12	0	0	0	1	2
mus_retrop95930	20	8	25	14	4	14
musiretrom32236	4	2	0	0	1	1
mus_retrop48579	1	0	0	1	1	0
mus_retrop48572	8	3	21	3	7	0
mus_retrop45850	2	0	0	1	1	0
mus_retrom39149	11	1	1	5	2	1
musiretrop12267	0	1	0	1	0	0
mus_retrop110734	0	1	0	1	0	0
mus_retrop65595	19	0	0	0	10	47243
mus_retrop110736	0	0	0	0	0	3
mus_retrop74042	0	0	0	0	0	7
mus_retrop111936	0	0	2	0	0	36
mus_retrom73160	0	2	2	10	0	0
mus_retrop66867	3	0	0	0	0	31
mus_retrom73169	0	1	0	0	0	0
mus_retrom48970	11	3	0	0	0	0
mus_retrop52843	2	3	1	2	1	6
mus_retrop58416	0	0	0	0	0	0
mus_retrom49555	0	0	0	0	0	9
mus_retrom49558	4	0	1	3	7	6
mus_retrom90513	3	2	0	1	3	7132
mus_retrom109057	31	0	1	0	0	11
mus_retrom43546	47	0	0	0	9	101382
musiretrom18782	3	0	0	0	0	2
mus_retrop91664	5	2	6	4	0	0
mus_retrop95321	1	0	0	1	0	518
mus_retrop95491	1	0	0	0	0	0
mus_retrop95328	0	0	0	0	0	1
mus_retrop95329	1	0	0	0	0	95
mus_retrop46034	8	2	0	0	0	0
mus_retrop92316	3	0	0	1	2	0
mus_retrop35589	0	0	0	0	0	0
mus_retrop96369	21	30	68	63	49	151
mus_retrop49028	345	58	4	7	8	33
mus_retrop46038	0	0	0	0	0	0
mus_retrom68874	3	1	0	0	0	0
mus_retrop71152	3	0	1	1	0	4
mus_retrom108904	0	0	0	0	0	9
mus_retrop44894	14	3	8	9	1	15
mus_retrop44896	28	11	44	20	40	31
musiretrom09418	0	1	0	0	1	0
mus_retrom66530	3	0	1	1	3	1
mus_retrop100278	7	2	0	0	1	29
mus_retrop104229	2	0	0	0	0	8
mus_retrop114141	0	0	0	0	25	412
mus_retrop78757	2	0	2	0	0	364
mus_retrop52661	0	0	0	0	0	6
mus_retrop52662	3	0	0	0	0	1
mus_retrom96945	9	3	3	2	2	1
mus_retrom96766	31	3	2	4	2	20
mus_retrom91235	0	0	0	0	0	0
mus_retrom91238	3	4	0	0	0	140
mus_retrom102414	0	0	0	0	0	0
mus_retrop97097	5	0	4	1	1	1
musiretrop41474	0	0	0	0	0	1
mus_retrom50122	3	1	1	2	2	0
mus_retrom50120	0	0	0	0	0	0
mus_retrop100890	0	0	0	0	0	0
mus_retrom106309	4	0	0	0	0	0
musiretrom07444	0	0	0	2	0	3
mus_retrop100895	5221	746	25	63	11	964
mus_retrop48089	18	2	3	2	1	8
mus_retrop97543	0	0	0	0	0	3
mus_retrom101827	0	0	0	0	0	0
mus_retrom101826	0	0	0	0	0	0
mus_retrop79404	1	0	0	0	0	0
mus_retrop79403	2	0	1	0	0	0
mus_retrop58257	184	66	111	35	77	163
mus_retrop58251	1	1	8	6	2	38
mus_retrop86720	0	1	1	1	1	61
mus_retrom67005	0	0	0	0	0	2
mus_retrop113262	0	0	0	0	0	0
mus_retrom70078	0	0	0	0	0	0
mus_retrom70072	0	0	0	0	0	0
mus_retrom70076	0	0	0	0	0	0
mus_retrom70074	0	0	0	0	0	0
mus_retrop112249	9	1	0	0	0	3
mus_retrop47519	0	0	0	0	0	0
mus_retrom80006	11	5	2	5	1	12
mus_retrom46721	1	1	1	0	0	0
mus_retrom46725	0	0	0	0	9	0
mus_retrom100159	0	0	0	0	0	1
mus_retrop44302	0	1	0	0	0	0
musiretrop11978	1	0	0	0	0	7
mus_retrom95444	6	2	2	4	2	10
mus_retrom44654	14	11	0	7	0	10
mus_retrom95339	0	0	0	0	0	0
mus_retrom68591	6	3	1	7	6	3
mus_retrop85456	2	0	0	0	0	40
mus_retrom61407	3	1	2	3	1	7
musiretrom33627	1	0	0	0	0	0
musiretrom10139	2	2	1	1	1	60
mus_retrom34682	0	0	0	0	0	0
mus_retrom34685	0	0	0	0	0	0
musiretrop08479	0	1	0	0	1	0
mus_retrom109190	4	2	2	1	2	3
mus_retrop95794	2	0	2	1	1	84
mus_retrop95791	0	0	0	0	0	30
mus_retrom72912	15	11	6	1	3	11
mus_retrop77781	0	0	0	0	0	0
mus_retrom98516	0	0	0	0	0	0
mus_retrom98525	3	0	0	0	0	0
mus_retrom98519	24	0	1	3	0	38
mus_retrom39088	0	0	1	0	0	0
mus_retrom45520	1	0	0	0	0	0
mus_retrom45523	0	0	0	0	0	0
mus_retrop103207	0	0	0	0	0	0
mus_retrom50946	0	0	0	0	0	1
musiretrop02012	0	1	0	0	0	39
musiretrop22139	0	0	0	0	0	232
mus_retrom108026	22	44	37	67	18	19
mus_retrom108027	0	0	0	0	0	0
mus_retrom59452	3	1	9	4	4	9
mus_retrom50805	1	0	2	0	0	4
mus_retrom124503	1	0	2	0	0	0
mus_retrop70410	2	1	4	2	3	1
mus_retrop56399	4	2	0	3	1	5
mus_retrop56395	0	0	1	0	0	0
mus_retrop56391	5	1	0	0	2	14
mus_retrom71937	22	2	10	5	6	1
mus_retrom73209	0	0	0	0	0	7
mus_retrom73204	0	0	0	0	0	12
mus_retrom73202	8	2	4	7	4	5
mus_retrop79366	0	0	0	1	2	0
mus_retrop79360	1	0	0	0	0	6
musiretrom09104	0	0	0	0	0	2
mus_retrom49146	1	0	1	0	1	0
mus_retrom123365	5	2	6	1	4	1
musiretrom15884	0	0	0	0	0	0
mus_retrop86531	3	5	1	0	0	0
mus_retrop46481	4	0	0	0	1	0
mus_retrom41533	20	0	0	0	2	14
mus_retrop58397	0	0	1	0	0	5
mus_retrom99260	2	0	0	2	0	1
mus_retrom72597	55	2	1	1	1	102
mus_retrom44419	0	1	0	0	0	1
mus_retrop113075	58	0	3	0	0	3
mus_retrom63005	15	3	0	0	2	22
mus_retrom41528	2	1	1	2	1	2
mus_retrop45687	0	1	0	0	0	11
mus_retrom90888	0	0	0	0	0	13
mus_retrom69952	0	0	0	0	0	0
mus_retrom123235	2	1	2	0	1	70
musiretrom03382	0	0	0	0	1	0
mus_retrom44465	0	0	0	0	0	0
musiretrop01845	0	0	0	0	0	0
mus_retrop85842	4	0	0	0	16	0
musiretrom35374	1	0	0	0	0	21
mus_retrom50274	8	4	1	0	0	25
musiretrop09660	47	10	6	13	2	12
mus_retrop112387	1	0	0	0	0	1
mus_retrop54169	4	0	0	0	7	2
mus_retrom91003	149	44	20	0	0	6
mus_retrop54165	10	1	0	0	0	0
mus_retrop54160	3	1	0	0	1	0
mus_retrop113387	16	1	5	8	5	5
mus_retrom40810	0	0	0	0	0	0
mus_retrom101368	10	3	3	4	7	4
mus_retrom102944	0	0	0	0	0	0
mus_retrop50391	5	0	0	0	0	0
mus_retrop50429	2	1	0	1	0	0
mus_retrop50398	0	0	0	1	0	1
mus_retrop59701	0	0	0	0	0	3
mus_retrop59706	0	0	0	0	0	0
mus_retrop112039	0	0	0	0	1	0
mus_retrop66498	1	1	0	0	0	0
mus_retrop66496	0	0	0	1	2	0
mus_retrom124881	22	3	3	1	3	5
mus_retrop74301	7	1	1	2	19	33
musiretrom32216	2	2	1	0	0	2
musiretrop16785	0	0	0	0	0	1
mus_retrop69583	3	0	0	3	5	41
mus_retrop69582	0	0	0	0	0	0
mus_retrop69581	7	1	1	1	0	767
mus_retrop45876	8	1	0	1	0	4
mus_retrop45870	23	0	0	0	12	55795
mus_retrop65608	0	0	1	1	0	5
musiretrop04333	197	97	147	47	51	34
mus_retrom70013	0	0	0	0	0	0
mus_retrom95837	1	0	0	0	1	3
mus_retrom95836	0	0	0	1	0	0
mus_retrop69729	0	0	0	0	0	0
mus_retrop69727	0	0	0	0	0	0
mus_retrop69725	0	0	1	0	0	0
mus_retrop69724	1	0	0	0	0	0
mus_retrop69723	0	0	0	0	0	4
mus_retrop66808	0	0	0	0	0	1
mus_retrop74067	29	22	32	20	14	23
mus_retrop110713	0	0	0	0	0	1
mus_retrop66800	3	0	2	0	1	4
mus_retrop58477	0	0	0	0	0	3
musiretrop33255	0	0	0	0	0	1
mus_retrom90538	0	0	0	0	0	0
musiretrop24247	0	0	1	0	0	0
musiretrop34701	0	0	0	0	0	75
mus_retrop95305	0	0	0	0	0	4
mus_retrom109032	1	1	2	1	1	1
mus_retrom68854	0	0	0	0	0	0
mus_retrom49538	17	18	1	6	0	7
mus_retrom49533	0	0	0	0	0	1
mus_retrop114162	0	0	0	0	1	0
mus_retrop78773	15	8	2	1	0	14
mus_retrop78770	2	0	0	0	0	4
mus_retrop54426	3	0	0	0	1	2375
mus_retrom69896	2	0	0	19	0	0
mus_retrop101692	0	1	1	0	0	15
mus_retrop52130	0	0	0	0	0	131
mus_retrom82244	0	0	0	0	0	0
mus_retrom82241	0	0	0	0	6	0
mus_retrom96921	4	1	0	1	1	4
mus_retrop112049	7	2	1	0	0	1
mus_retrop96303	0	0	0	0	0	0
mus_retrop46017	3	2	7	1	4	2
mus_retrop46015	57	15	38	32	2	4
mus_retrom106320	2	0	0	0	1	0
mus_retrom106327	30	2	1	0	0	1
mus_retrop114573	4	0	0	0	0	0
musiretrop14258	0	0	0	0	0	3
[truncated: 3,573 more rows]

## Sheet: Rat
# Supplemental Table S2: Retrocopy expression (≥1 unique read) in rat
# The number of unique reads refers to those mapped in all samples from the same organ
# The number of unique reads mapping on each retrocopy locus (as defined in Supplemental Table S1) was obtained using the CoverageBed function from the Bedtools suite.
retro_ID	Brain	Cerebellum	Heart	Kidney	Liver	Testis
rno_retrop01992	2	8	1	2	1	2
rno_retrom00798	0	0	0	0	0	0
rno_retrop01997	1	0	0	0	0	0
rno_retrom00796	0	0	0	0	0	0
rno_retrom00794	0	0	0	0	0	0
rno_retrom00795	83	44	147	86	38	74
rno_retrom00792	5	3	2	2	1	1
rnoiretrop11954	0	0	0	0	0	4
rno_retrop00021	0	0	0	0	0	0
rno_retrom06300	0	0	0	0	0	0
rno_retrom06306	9	9	9	8	4	0
rno_retrom06305	0	0	0	0	2	0
rnoiretrop38894	32	37	13	24	9	23
rno_retrom01848	0	0	3	0	5	1
rnoiretrop42469	2	0	0	0	0	0
rnoiretrop47948	0	0	0	1	0	0
rno_retrop01998	1	1	1	0	0	2
rno_retrom00140	8	51	0	22	2	0
rno_retrop02595	0	0	0	1	0	8
rno_retrom00149	430	320	282	382	284	278
rnoiretrom30711	0	0	0	0	0	0
rno_retrom05421	0	2	0	0	0	0
rnoiretrop36793	2	0	0	0	0	0
rno_retrom06301	0	0	0	0	0	0
rnoiretrop45849	0	0	0	0	1	0
rnoiretrop44203	0	0	0	0	0	0
rno_retrom04237	0	0	0	0	0	0
rno_retrom04231	1	0	0	0	0	0
rno_retrom04232	3	1	0	0	0	0
rno_retrom04239	0	0	0	0	0	0
rno_retrom04238	0	0	0	0	0	0
rno_retrom05545	0	0	0	0	0	0
rno_retrom05546	0	0	0	0	0	0
rno_retrom05540	0	0	0	0	0	0
rnoiretrop41837	0	1	0	0	0	207
rno_retrom05543	0	0	0	0	0	0
rno_retrom03487	0	0	0	0	0	0
rno_retrom05018	0	0	0	0	0	0
rno_retrom05019	0	0	0	0	0	2
rno_retrom05548	0	0	0	0	0	0
rnoiretrom14836	183	110	17	47	15	111
rno_retrop00684	0	0	0	1	1	0
rnoiretrop15485	0	0	0	0	0	0
rnoiretrom41366	2	1	0	0	0	1
rnoiretrop04347	0	0	0	0	0	0
rnoiretrop32494	1	2	1	11	0	1
rno_retrom04499	0	0	0	1	0	10
rno_retrom04498	0	0	0	0	0	0
rnoiretrop26627	0	0	0	0	0	0
rno_retrom04490	0	0	0	1	0	0
rnoiretrop26628	0	0	0	0	0	1
rno_retrom04496	1	0	1	1	0	0
rno_retrop02177	2	1	0	2	0	1
rno_retrop02175	0	0	0	0	0	0
rno_retrop02172	2	1	0	7	3	3
rno_retrop02170	0	0	0	0	0	0
rnoiretrop30896	0	0	0	0	0	0
rnoiretrop30895	0	0	0	0	0	0
rno_retrom01203	0	2	0	4	2	7
rno_retrom00316	0	0	0	0	1	1
rno_retrom01207	0	0	1	0	0	60
rnoiretrop43493	2	0	0	0	0	0
rno_retrom00073	0	0	0	0	0	15
rno_retrop02312	1	0	1	1	0	8
rno_retrop02311	0	0	0	0	0	33
rno_retrop02315	6	1	0	1	0	3802
rno_retrop02314	1	0	0	1	0	0
rno_retrop02319	4	1	3	4	1	0
rno_retrop02318	0	0	0	0	0	2
rno_retrom06098	0	0	0	0	0	1
rno_retrom06093	0	2	1	0	0	0
rno_retrom06092	4	4	1	0	0	0
rno_retrom06091	0	0	0	0	0	1
rno_retrom06097	0	0	0	0	0	0
rno_retrom06096	0	0	0	0	0	0
rno_retrom06095	0	0	0	0	0	20
rno_retrom06094	0	0	0	0	0	0
rnoiretrom37356	0	0	0	0	0	0
rno_retrom01673	0	0	0	0	0	0
rno_retrom01670	1	0	1	0	0	45
rno_retrom01671	0	0	0	0	0	0
rno_retrom01677	0	0	0	0	0	0
rno_retrom01675	0	1	0	0	0	0
rno_retrom01678	0	0	0	0	0	4
rno_retrom01679	0	0	0	0	0	2
rnoiretrop29094	0	0	0	0	0	0
rnoiretrop31326	0	0	0	0	0	0
rno_retrom07323	0	0	0	0	0	1
rno_retrom07326	0	0	0	0	0	0
rno_retrom07325	0	0	0	2	0	33
rnoiretrop24419	0	0	0	0	0	0
rnoiretrop24416	0	0	0	0	0	0
rno_retrop00750	0	1	1	1	0	0
rnoiretrop41649	0	2	0	0	0	0
rnoiretrop05754	0	0	0	0	0	0
rnoiretrop51836	1	1	0	3	0	201
rnoiretrop51833	2	0	0	0	0	2
rnoiretrom02573	0	0	0	0	0	0
rnoiretrop44920	5	1	32	3	0	1
rnoiretrop49342	0	0	0	0	0	18
rnoiretrop36499	24	19	15	29	30	58
rnoiretrop50407	4	1	0	1	3	1
rno_retrom02323	72	28	3	10	0	199
rnoiretrop30635	0	1	0	0	0	408
rnoiretrom11410	0	0	0	0	0	0
rnoiretrom51057	0	0	0	0	0	0
rnoiretrom49428	0	0	0	0	0	0
rnoiretrop46976	0	0	0	0	0	326
rnoiretrop36670	0	0	0	0	0	0
rno_retrom00679	0	0	0	1	0	0
rno_retrom00670	0	0	0	0	0	0
rno_retrom00673	0	1	0	0	0	1
rno_retrom00674	0	0	0	0	0	0
rno_retrom00677	0	0	0	0	0	0
rno_retrop00759	0	0	0	0	0	0
rno_retrop00758	0	0	0	0	0	0
rnoiretrop26015	1	0	0	0	0	0
rno_retrop00928	0	0	0	0	0	0
rno_retrop00929	0	0	0	0	0	0
rno_retrop00925	0	0	0	0	0	0
rno_retrom06530	0	0	0	0	0	0
rno_retrom06531	1	1	0	1	0	1309
rno_retrom06532	0	0	0	0	0	4
rno_retrom06533	0	0	0	0	0	0
rno_retrom06534	1	0	0	0	0	0
rnoiretrop04158	0	0	0	0	0	0
rno_retrom06536	0	0	0	0	0	0
rno_retrom06537	1	0	3	6	0	1
rno_retrom06538	2	1	0	0	0	0
rnoiretrop42695	4	4	6	13	1	4
rno_retrom01070	0	1	0	0	0	0
rno_retrom03555	1	0	0	0	0	1
rno_retrom04552	1	1	0	1	1	2
rno_retrom01075	2	1	1	0	0	0
rno_retrom04556	0	0	0	0	0	0
rno_retrop00757	0	0	0	0	0	0
rnoiretrom26810	0	0	0	0	0	0
rnoiretrop27493	1	0	0	0	0	0
rnoiretrop27490	1	0	0	0	0	4
rnoiretrom45306	0	0	0	0	0	0
rnoiretrom40774	9	1	0	1	0	0
rnoiretrom21442	2	0	0	0	0	93
rno_retrop00654	0	0	0	0	0	0
rno_retrom06356	0	0	0	5	0	0
rnoiretrop21545	8	2	1	0	0	0
rno_retrom01343	0	0	0	0	0	0
rnoiretrop29564	0	0	0	0	0	0
rnoiretrop29567	1	0	0	0	0	0
rnoiretrop37078	0	0	0	384	0	1
rnoiretrop32553	0	0	0	0	0	3
rnoiretrop33759	0	0	0	0	0	0
rnoiretrop33209	0	0	0	0	0	0
rno_retrom05207	0	0	0	1	0	0
rno_retrom02526	0	0	0	0	0	0
rno_retrom02525	0	0	0	0	0	0
rno_retrom02523	1	0	2	3	1	0
rno_retrom05201	12	7	9	14	4	0
rno_retrom05200	0	0	0	0	0	0
rnoiretrop17410	2	0	0	1	0	1
rnoiretrom15417	0	0	0	0	0	1
rno_retrom06951	1	0	2	1	1	2
rno_retrom06954	1	0	0	0	0	0
rnoiretrop47317	0	0	0	0	0	0
rno_retrop02436	0	0	0	0	0	0
rno_retrop02437	0	1	1	2	1	0
rno_retrop02433	0	0	0	0	0	0
rnoiretrom18623	4	0	0	1	2	2
rnoiretrop50975	41	51	5	12	0	141
rnoiretrop46370	0	1	1	24	19	9
rnoiretrom53961	401	259	400	479	149	165
rnoiretrop29157	0	0	0	0	0	0
rnoiretrop51627	0	0	0	0	0	0
rnoiretrop44466	0	0	0	0	0	29
rnoiretrop37690	0	0	0	0	0	0
rnoiretrom18953	1	2	0	0	0	2839
rnoiretrop35697	0	0	0	0	0	0
rno_retrom03697	0	0	0	1	0	1
rno_retrop00494	10	11	0	1	0	2
rno_retrom03695	0	0	0	2	0	3
rno_retrop00493	0	0	0	0	0	0
rno_retrom03690	1	0	0	3	0	10
rnoiretrop38421	60	54	14	33	0	5
rno_retrom03698	0	0	0	0	0	0
rno_retrop00499	3	0	0	1	0	0
rnoiretrop25739	0	0	0	0	0	0
rno_retrom06527	1	0	0	0	0	0
rnoiretrop25735	0	0	0	0	0	0
rno_retrom06526	0	1	0	0	0	0
rnoiretrop24066	0	0	0	0	2	0
rno_retrom00809	6	10	2	5	0	7
rno_retrom00807	0	0	0	0	0	4
rno_retrom00804	0	0	0	0	0	0
rno_retrom00805	1	0	0	0	0	0
rno_retrom00801	0	0	6	8	2	103
rno_retrom03610	0	0	0	0	0	0
rnoiretrop38523	0	0	0	0	0	0
rno_retrom03611	0	0	0	0	0	0
rno_retrop00140	2	1	0	0	0	0
rnoiretrop28576	0	0	0	0	0	0
rno_retrom03344	0	0	0	0	0	0
rno_retrop00145	0	0	0	0	0	0
rno_retrom03347	0	0	0	0	0	0
rno_retrom03349	0	0	0	0	0	0
rno_retrop01812	0	0	0	0	0	0
rno_retrop02899	0	3	0	1	0	0
rnoiretrop24600	1	1	1	1	0	1
rno_retrop02891	2	3	0	0	0	2
rnoiretrop24609	3	0	6	2	1	2
rno_retrom02040	0	0	0	0	0	2
rno_retrop02896	0	0	0	0	0	1
rno_retrom03205	0	2	1	1	1	3289
rno_retrom03204	0	0	0	0	0	4
rno_retrom06327	1	3	0	0	2	0
rno_retrom03206	0	0	2	0	0	3893
rno_retrom06320	0	0	0	0	0	0
rno_retrom03202	0	0	2	0	0	0
rno_retrom06328	0	0	0	0	0	0
rnoiretrop36805	0	0	0	0	0	10
rnoiretrop36802	0	0	0	0	0	0
rno_retrom04545	0	0	0	0	1	0
rnoiretrop27262	0	0	0	2	0	16
rnoiretrop42992	3	2	0	3	0	1
rnoiretrop27269	0	0	0	1	0	3
rnoiretrom30736	0	0	0	0	0	21
rnoiretrop39691	0	0	0	0	0	1
rnoiretrop39697	0	0	0	0	0	0
rno_retrom05988	1	0	1	1	0	0
rno_retrom05986	1	0	0	0	0	0
rno_retrom05987	2	1	0	0	0	3
rno_retrom05980	0	0	0	0	0	0
rnoiretrom32599	0	0	0	0	1	0
rnoiretrop29712	4	0	6	1	4	2
rnoiretrop22524	0	0	0	0	0	0
rno_retrom07055	0	0	0	0	0	2
rno_retrom07056	0	0	0	0	0	4
rno_retrom07053	2	0	1	0	0	1
rno_retrop00111	0	0	0	0	0	2
rnoiretrom00589	0	0	0	0	0	0
rno_retrom06448	6	5	5	1	8	4
rnoiretrop36114	0	0	0	0	0	0
rnoiretrom50733	1	1	0	0	0	1
rnoiretrom41306	1	0	0	0	0	82
rnoiretrop47263	0	0	0	0	0	18
rnoiretrom53288	39	19	4	4	3	1289
rnoiretrom29226	0	0	0	0	1	0
rnoiretrop26608	0	0	1	0	0	0
rnoiretrop37448	0	0	0	0	0	0
rnoiretrop26355	2	0	0	0	1	2
rno_retrom01193	0	0	0	0	0	0
rno_retrom01192	0	0	0	0	0	1
rno_retrom01191	0	0	0	0	0	0
rno_retrom01190	0	0	0	0	0	0
rno_retrom01197	1	1	0	0	0	0
rno_retrom01196	16	7	9	180	72	8
rno_retrom01194	0	0	0	0	0	0
rno_retrop00364	1	0	0	0	0	0
rno_retrom01198	3	4	3	6	97	32
rno_retrom00583	37	23	8	35	11	438
rnoiretrop35972	10	5	1	2	0	0
rno_retrom00580	0	0	0	0	0	0
rno_retrop02155	0	1	0	0	0	1
rnoiretrop16661	0	0	0	0	1	0
rno_retrop02157	9	4	1	6	1	0
rnoiretrop16663	856	682	200	435	260	382
rno_retrop02159	0	0	0	0	0	0
rno_retrom05562	0	0	1	0	0	0
rno_retrom05561	0	0	0	0	28	1
rnoiretrop37998	0	0	0	0	0	1
rnoiretrop37990	0	1	1	0	0	0
rno_retrom04619	0	0	0	0	0	80
rno_retrom04616	0	0	0	0	0	0
rno_retrom04614	5	1	0	0	0	0
rno_retrom04613	4	16	13	25	7	8
rno_retrom04612	0	0	0	0	0	0
rnoiretrop47769	6	21	14	9	1	15
rno_retrom04610	7	13	26	15	6	6
rnoiretrop43477	0	0	0	0	0	0
rnoiretrop23807	0	0	0	0	0	31
rno_retrop02339	8	0	0	0	0	0
rno_retrop02338	0	1	0	0	0	0
rno_retrop02335	18	5	0	0	0	6
rno_retrom00054	0	0	0	0	0	2
rno_retrop02337	2	0	0	0	0	0
rno_retrop02336	7	0	0	0	1	1
rno_retrom00052	0	0	0	0	0	3
rno_retrom05698	0	0	0	0	0	0
rno_retrom05699	0	0	0	0	1	0
rno_retrom05694	0	0	0	0	1	0
rno_retrom05696	0	0	0	0	0	0
rno_retrom03595	1	0	1	3	0	3
rno_retrom03594	13	5	10	23	6	9
rno_retrom03597	0	0	0	0	0	0
rno_retrom03596	2	0	0	0	0	6
rnoiretrom15998	7	0	0	0	0	0
rno_retrom03593	0	0	0	0	0	0
rno_retrom03592	0	0	1	0	0	0
rnoiretrop03630	92	77	2	5	0	0
rnoiretrop21374	0	0	0	0	0	0
rnoiretrom26880	0	0	0	0	1	0
rnoiretrop31123	0	0	1	0	0	0
rnoiretrom47010	0	0	0	0	0	0
rno_retrop01158	0	0	0	0	0	1
rno_retrop01154	0	0	0	0	0	3
rno_retrop01155	0	1	0	4	55	0
rno_retrop01156	0	0	0	0	0	0
rno_retrop01157	0	0	0	0	0	0
rno_retrop01150	0	0	0	0	0	0
rno_retrop01153	2	0	0	0	0	0
rnoiretrop35596	0	0	0	0	0	0
rnoiretrop31690	655	335	156	161	47	81
rnoiretrop25074	0	0	0	0	0	1
rno_retrom05229	0	1	0	0	0	0
rnoiretrom08925	0	0	0	0	0	1
rnoiretrop24478	2	0	3	4	4	1
rnoiretrop41627	0	0	0	0	0	0
rnoiretrop05770	0	0	0	0	0	0
rnoiretrop51817	0	0	0	0	0	1
rnoiretrop28791	0	0	0	0	0	0
rno_retrom04895	0	0	0	0	0	0
rnoiretrop36471	389	134	3	972	2272	2
rnoiretrom26624	0	0	0	0	0	0
rno_retrom02342	11	3	4	5	2	0
rno_retrop01541	1	0	0	0	0	0
rno_retrop01546	0	0	0	8	1	0
rno_retrom02345	96	8	2	4	1	2330
rno_retrom02344	3	3	1	1	6	5269
rno_retrom04492	0	0	0	0	0	0
rnoiretrop36615	0	0	0	0	0	0
rnoiretrom44096	0	0	1	0	0	0
rno_retrom00611	1	2	3	3	3	0
rno_retrom00617	0	0	0	0	0	2
rno_retrom00616	0	0	2	1	0	15
rno_retrom00615	8	9	1	22	140	4
rno_retrom00618	0	0	0	0	0	18
rnoiretrop45050	0	0	0	0	0	0
rnoiretrop22731	0	0	0	0	0	0
rnoiretrop27928	0	1	1	0	0	0
rno_retrom02969	0	0	0	0	0	0
rno_retrom02968	0	0	0	0	0	0
rnoiretrop18786	1	0	2	78	2	3
rno_retrom02963	0	0	0	0	1	0
rno_retrom02961	1	0	0	0	0	2
rno_retrom02960	0	0	0	0	0	0
rnoiretrop06955	1	0	0	0	0	0
rnoiretrop43904	475	279	539	573	340	197
rno_retrop00949	0	0	0	0	0	1
rno_retrom06518	3	3	0	2	1	0
rno_retrom06519	0	0	0	0	0	0
rno_retrop00940	1	2	1	1	0	1
rno_retrop00942	1	3	1	0	1	2
rno_retrom06517	0	0	0	0	0	0
rno_retrom06514	0	0	0	0	0	14
rnoiretrom49448	0	0	0	0	0	0
rnoiretrom49119	0	0	0	0	0	0
rno_retrom01053	0	0	0	0	0	0
rno_retrom04570	1	0	0	0	0	0
rno_retrom01051	7	4	3	5	4	1
rnoiretrop18163	0	0	0	0	0	1
rno_retrom00704	0	0	0	1	0	0
rno_retrom00707	0	0	0	0	0	0
rnoiretrop45428	0	1	0	1	1	0
rnoiretrom46821	0	0	0	0	0	0
rnoiretrom54080	0	0	0	0	0	0
rnoiretrop34962	0	6	0	0	0	0
rno_retrom03476	0	2	0	0	0	0
rnoiretrop29360	0	0	0	0	0	0
rno_retrom02388	1	6	0	2	0	0
rno_retrom05867	0	0	0	0	0	0
rno_retrom06115	9	2	5	4	3	0
rnoiretrop21567	0	0	0	0	0	6
rno_retrop00672	4	2	1	2	1	12
rno_retrom06110	0	0	0	0	0	0
rnoiretrom24563	9	16	2	0	0	0
rno_retrop00671	0	0	0	0	0	3
rnoiretrop26298	1	0	0	1	0	1756
rnoiretrop34503	1	0	0	3	2	0
rnoiretrop21749	0	0	0	0	0	0
rnoiretrop21741	0	0	0	0	0	0
rno_retrom02500	0	0	0	0	0	0
rno_retrom05223	93	52	29	52	18	30
rno_retrom02502	0	0	0	0	0	0
rno_retrop01304	6	10	1	5	2	1
rno_retrop01307	0	0	0	0	0	0
rno_retrom02506	0	0	0	89	0	0
rno_retrop01309	0	0	0	0	0	0
rno_retrom02508	0	0	0	0	0	6
rno_retrom04981	0	0	10	0	0	3
rno_retrop02452	9	5	11	17	11	0
rno_retrop02455	1	0	0	0	0	0
rno_retrop02457	0	0	0	0	0	0
rno_retrop02459	0	0	0	0	0	0
rnoiretrop51641	0	0	0	0	0	0
rnoiretrop51645	2	9	0	7	2	0
rnoiretrom29410	0	0	0	0	0	0
rnoiretrop35108	377	283	297	400	181	401
rnoiretrom22999	0	0	0	0	0	1
rnoiretrop35103	0	0	0	0	0	0
rnoiretrop30421	0	0	0	0	0	0
rnoiretrom39847	0	0	0	0	0	13
rno_retrop02313	1	1	2	3	1	0
rnoiretrop38449	0	0	0	0	0	0
rnoiretrop43284	1	0	0	0	0	0
rnoiretrop43285	0	0	0	0	0	0
rno_retrom00868	0	0	0	0	0	4
rno_retrom00869	0	0	0	0	0	32
rno_retrom00075	1	2	1	31	0	48
rnoiretrop45638	0	0	0	0	0	0
rno_retrom00864	0	0	0	0	0	0
rnoiretrop48882	1	0	0	0	0	0
rnoiretrop38501	0	0	0	0	0	0
rno_retrom03362	0	0	0	0	0	2
rno_retrom03360	1	0	0	0	0	0
rno_retrom03366	0	0	0	0	0	0
rnoiretrop38508	0	1	0	2	0	2
rno_retrom03365	23	14	3	6	1	26
rnoiretrom19550	0	0	0	0	0	1
rno_retrom01731	0	1	0	0	0	0
rno_retrom01739	0	0	0	0	0	1
rnoiretrop43137	0	0	0	0	0	0
rnoiretrop03401	0	0	0	0	0	0
rnoiretrop05127	0	0	0	0	0	0
rnoiretrop48716	0	3	0	0	0	28
rnoiretrop45199	0	0	0	0	0	1
rnoiretrop45191	0	0	0	0	0	0
rnoiretrop38741	0	0	0	0	0	0
rnoiretrop42425	0	0	0	0	0	1
rno_retrom01881	0	0	0	0	0	0
rno_retrom01882	0	0	0	0	0	1
rno_retrom01885	0	0	0	0	0	0
rno_retrom01887	1	1	0	0	0	0
rno_retrom01886	0	0	0	0	0	1
rnoiretrop36865	0	0	0	0	0	0
rnoiretrop27248	0	0	0	0	0	3
rno_retrom05905	0	0	0	0	0	0
rno_retrop02425	0	0	0	0	0	0
rnoiretrop27242	0	0	0	5	0	16
rno_retrop02424	0	0	0	0	0	0
rno_retrop01931	1	1	3	8	0	0
rnoiretrop31483	40	27	43	38	22	109
rno_retrop01937	0	0	0	0	0	0
rnoiretrop39672	0	0	0	0	0	0
rnoiretrop39908	1	0	0	0	0	0
rnoiretrop09388	0	0	1	0	0	4
rno_retrom02286	0	0	0	26	0	0
rno_retrom02285	0	1	1	3	0	1
rno_retrom02283	0	0	0	0	0	35
rno_retrom02281	0	1	0	1	0	0
rnoiretrop24625	0	0	0	0	0	0
rnoiretrop24626	0	0	0	0	0	0
rno_retrom02288	0	0	0	0	0	0
rnoiretrop27023	0	1	0	0	0	0
rno_retrop01543	0	0	0	0	0	0
rnoiretrop29777	0	0	0	0	0	0
rnoiretrom06466	0	0	21	0	0	0
rnoiretrop44240	10	12	8	8	5	1
rnoiretrop50230	0	0	0	0	0	0
rnoiretrop26997	0	0	0	0	0	0
rnoiretrop41191	0	0	0	0	0	0
rnoiretrom17472	0	0	0	0	0	0
rno_retrop02852	0	0	0	0	0	0
rno_retrom04452	0	1	0	0	0	13
rnoiretrop14861	0	0	0	1	0	0
rnoiretrom16785	1	1	0	0	0	0
rnoiretrop14869	0	0	0	0	0	0
rnoiretrop15198	0	0	0	0	0	0
rnoiretrop44107	0	0	0	2	0	0
rnoiretrop15190	1	0	0	0	22	4
rnoiretrop41990	0	0	0	0	0	0
rnoiretrop36132	0	0	0	0	0	12
rnoiretrop41999	1	1	2	1	2	0
rnoiretrop28826	10	18	4	1	1	3
rnoiretrop26372	0	0	0	0	0	0
rnoiretrom07333	0	0	0	0	0	0
rnoiretrom15494	0	0	0	0	0	0
rnoiretrop12086	0	1	0	3	0	0
rno_retrop02133	0	0	0	0	0	0
rnoiretrop35954	0	0	0	0	0	0
rno_retrop02130	0	0	1	1	1	16
rno_retrop02137	0	0	0	0	0	0
rno_retrop02134	1	0	8	2	0	0
rno_retrom05508	0	0	0	0	0	0
rno_retrom06708	0	0	0	0	0	2
rno_retrom05501	3	11	11	16	7	2
rno_retrom05502	16	11	11	45	7	4
rno_retrom05503	0	25	0	1	11	92
rnoiretrom16252	1	1	0	0	0	0
rno_retrom06702	0	3	1	0	0	120
rno_retrom06851	0	0	0	0	0	0
rno_retrom06850	2	0	2	1	3	0
rno_retrom04639	0	0	0	0	0	0
rnoiretrop47742	0	1	5	3	1	1
rnoiretrop47746	281	67	67	86	11	46
rno_retrom04631	0	0	0	0	0	0
rno_retrom04630	0	0	0	0	0	0
rno_retrom04632	0	0	0	0	0	0
rno_retrom04634	0	0	0	0	0	0
rno_retrom04637	0	0	0	0	0	0
rnoiretrop23821	0	0	0	0	0	1
rno_retrop02681	1	0	0	0	0	0
rno_retrop02680	0	0	0	0	0	2
rnoiretrop43456	0	0	0	2	0	0
rno_retrop00267	0	0	0	0	0	0
rnoiretrop45673	1	1	114	5	0	0
rno_retrom06586	4	1	0	2	0	20
rno_retrom06580	1	0	0	1	1	0
rnoiretrop27562	0	0	0	0	0	0
rnoiretrop21357	1	1	1	2	0	1
rno_retrom06589	5	1	0	0	0	75
rnoiretrom24606	34	30	9	23	4	14
rnoiretrop42349	1	1	3	1	1	0
rnoiretrom47079	1	0	3	2	1	0
rnoiretrom04681	0	0	0	0	0	0
rno_retrop01176	21	3	0	0	0	0
rno_retrop01177	0	0	0	0	0	0
rno_retrop01175	0	0	0	0	0	0
rno_retrop01172	0	0	0	0	0	0
rnoiretrom16921	0	1	0	0	0	0
rno_retrop01179	0	0	0	0	0	0
rnoiretrop51787	0	0	0	0	0	0
rnoiretrom12303	1350	850	0	1	0	0
rnoiretrop41606	0	1	0	0	1	0
rnoiretrop24457	0	0	0	0	0	0
rnoiretrom27117	0	0	0	0	0	15
rno_retrom03689	0	0	0	0	0	0
rnoiretrop49384	0	0	1	0	0	1
rnoiretrom29951	22	18	3	9	4	10
rnoiretrop06622	0	0	1	0	0	0
rno_retrom02364	0	0	1	0	0	1
rno_retrop01567	0	0	0	0	0	1
rnoiretrop36452	0	0	0	0	0	0
rno_retrop01561	0	0	0	0	0	2
rno_retrom02360	0	1	0	0	0	1
rno_retrop01562	0	0	0	0	0	0
rno_retrom02369	1	0	0	0	0	1
rno_retrom02368	0	0	0	0	0	0
rnoiretrop38044	0	0	0	0	0	0
rno_retrop01728	0	0	0	0	0	1
rnoiretrom11458	0	0	0	0	0	40
rnoiretrom51092	0	0	0	0	0	0
rnoiretrom02352	0	0	0	0	0	0
rnoiretrom03339	0	1	0	0	0	2
rno_retrom03684	0	0	0	0	0	0
rno_retrom00638	0	0	0	0	1	0
rno_retrop02915	0	0	0	0	0	0
rno_retrop02914	0	0	0	0	0	58
rno_retrom00637	12	14	12	25	5	0
rno_retrom00636	0	0	0	0	2	1
rno_retrom00631	0	0	0	0	0	5
rno_retrop02910	0	1	2	0	3	2
rno_retrom00633	0	0	0	0	0	0
rnoiretrop30651	0	0	0	0	0	0
rno_retrom06288	0	0	0	0	0	0
rno_retrom06289	0	2	0	2	1	3639
rno_retrom06282	0	0	0	0	0	9
rno_retrom06283	0	0	0	0	0	0
rno_retrom06280	0	0	0	0	0	0
rno_retrom06281	0	2	0	0	2	0
rno_retrom06286	0	0	0	0	0	0
rno_retrom06287	0	0	0	0	0	6
rno_retrom01948	0	0	0	0	0	0
rnoiretrop04997	0	0	0	0	0	0
rno_retrom02949	0	0	0	0	0	0
rno_retrom02948	0	0	0	0	0	0
rno_retrom02941	0	0	0	0	0	0
rno_retrom02940	0	0	0	0	0	0
rno_retrom02942	2	1	0	1	0	0
rno_retrom02945	7	3	1	23	0	9
rnoiretrop06971	0	0	0	0	0	0
rnoiretrop43925	9	0	1	0	0	3
rnoiretrop48033	0	0	0	0	0	0
rno_retrop00963	17	19	26	15	3	2
rno_retrom03016	1	4	0	0	0	6
rno_retrop00961	0	1	2	3	0	0
rno_retrop00966	0	0	0	0	0	2
rno_retrom03012	10	6	2	4	1	3
rnoiretrop00754	11	5	10	6	0	3
rno_retrop00968	0	0	0	0	0	0
rnoiretrop04195	374	213	232	449	263	362
rnoiretrop29233	0	0	0	0	0	1
rnoiretrom19533	0	0	0	0	0	0
rnoiretrop29692	0	0	0	0	0	0
rnoiretrop29698	0	0	0	0	0	0
rnoiretrom02821	0	1	0	1	0	0
rno_retrop02050	0	0	0	0	0	0
rnoiretrop21508	0	0	0	0	0	0
rnoiretrop29526	0	0	0	0	0	0
rnoiretrop35353	0	3	2	0	3	1
rnoiretrop41383	0	0	0	0	0	0
rno_retrom05249	1	1	2	1	1	1
rno_retrom05248	0	0	0	0	1	15
rno_retrom02563	1	1	1	0	0	1378
rno_retrop01362	0	1	2	0	2	0
rno_retrom02561	0	1	0	0	1	0
rno_retrop01360	37	60	20	85	18	4
rno_retrom05247	3	1	1	4	3	1
rno_retrom02566	3	0	0	0	0	0
rno_retrop01365	0	0	0	0	0	11
rnoiretrop44712	0	0	0	0	0	0
rnoiretrom41462	0	0	0	0	0	1
rnoiretrop40835	0	0	0	0	0	0
rnoiretrop46407	1	0	0	0	0	1
rnoiretrop33889	0	0	0	0	0	0
rnoiretrop51664	0	0	0	0	0	0
rnoiretrom53927	0	0	0	0	0	0
rnoiretrom34400	0	0	0	0	0	0
rnoiretrop26416	1	0	0	0	0	0
rnoiretrop26410	0	0	0	0	0	0
rnoiretrom39869	1	0	0	1	0	5
rnoiretrop35160	479	234	58	202	38	2468
rnoiretrop38468	0	0	0	0	0	0
rno_retrom04478	0	0	0	0	0	0
rnoiretrop38465	0	2	0	0	0	0
rnoiretrop42090	5	4	16	7	0	10
rnoiretrop42098	3	8	0	0	0	2
rno_retrop02472	0	0	0	0	0	0
rno_retrop02470	1	0	0	0	0	1
rno_retrop02471	0	0	0	0	0	6
rno_retrom00842	0	0	1	0	3	1
rno_retrom00840	0	0	0	0	0	0
rno_retrom00841	0	0	0	39	30	0
rnoiretrop48557	0	0	0	1	0	1
rno_retrom00848	0	0	0	0	0	8
rno_retrom00849	0	0	0	0	0	1
rno_retrom03385	0	0	0	0	0	0
rno_retrop00187	0	0	0	0	0	0
rno_retrop00180	0	0	0	3	0	21
rno_retrom03381	0	0	3	4	2	0
rno_retrom03382	1	2	4	3	1	0
rno_retrop00188	0	0	0	0	0	0
rno_retrop00189	0	0	0	0	0	0
rno_retrom01713	0	0	0	0	0	0
rno_retrom01712	0	2	0	2	0	2
rnoiretrop52312	0	0	0	0	0	0
rno_retrom01716	4	5	0	0	0	0
rno_retrom01719	0	1	0	1	0	0
rnoiretrop33865	0	0	0	0	0	0
rnoiretrop43758	1	2	0	0	0	1
rnoiretrop33861	0	0	0	1	0	0
rnoiretrop06102	0	0	0	0	0	0
rnoiretrop42407	0	0	0	0	0	0
rnoiretrop47926	0	0	0	0	0	0
rnoiretrop28765	0	0	0	0	0	0
rnoiretrop25996	315	194	336	277	106	49
rnoiretrop39731	0	0	0	0	0	0
rnoiretrop36848	0	0	0	0	0	0
rnoiretrop24025	0	0	0	0	0	0
rnoiretrop28465	0	0	0	0	0	0
rno_retrop02278	0	0	0	0	0	0
rnoiretrom45590	0	0	0	0	0	0
rno_retrom00159	2	2	3	1	0	1
rnoiretrop41019	0	0	0	0	0	0
rno_retrop01974	0	0	0	0	0	0
rno_retrop01973	0	0	0	0	0	0
rnoiretrop48733	6	0	3	0	0	0
rnoiretrop22075	0	0	0	3	0	157
rnoiretrop27598	0	0	0	0	0	3
rnoiretrop29759	0	0	2	1	0	0
rnoiretrop14880	0	0	0	0	0	0
rnoiretrop41176	0	0	0	0	0	15
rnoiretrom11158	0	0	0	0	0	0
rnoiretrom49706	3	2	0	1	0	0
rno_retrom03495	0	0	0	0	0	0
rnoiretrop26170	0	0	0	0	0	0
rnoiretrom50770	2	1	2	1	0	1
rno_retrom06499	11	19	0	1	0	20
rno_retrom06497	0	0	0	0	0	0
rno_retrom06496	0	0	0	0	0	0
rno_retrom06492	0	0	0	0	0	0
rno_retrom06491	0	0	0	0	1	0
rnoiretrop37401	0	1	4	0	0	0
rno_retrom01157	3	0	1	2	1	0
rno_retrom01155	0	0	0	5	3	0
rno_retrom04433	2	1	1	3	0	0
rno_retrom04432	0	0	0	0	0	0
rno_retrom01151	0	0	0	0	0	0
rno_retrom01150	0	0	0	0	1	26
rno_retrom04381	0	0	0	0	0	0
rnoiretrom25539	0	0	0	0	0	0
rno_retrop02115	0	0	0	0	0	0
rnoiretrop43715	0	0	0	0	0	0
rno_retrom00541	0	0	0	0	0	0
rno_retrom00540	0	0	0	0	0	1
rnoiretrop16993	0	0	0	0	0	0
rno_retrop02118	7	1	3	0	0	3
rno_retrom00549	0	0	0	0	0	0
rnoiretrop45383	38	3	9	4	2	1
rno_retrom05523	0	0	0	0	0	0
rnoiretrom46475	0	0	0	0	0	0
rno_retrom05521	0	0	0	0	1	2
rnoiretrop19421	0	0	0	0	0	0
rno_retrom06721	0	0	0	0	0	2
rnoiretrop45388	1	0	0	0	0	0
rnoiretrop19358	0	0	0	0	0	0
rno_retrom06877	0	0	0	0	0	0
rno_retrom06876	15	8	8	12	4	2
rno_retrom06879	0	0	0	0	0	1
rnoiretrop47720	0	0	0	0	0	0
rno_retrom04653	0	0	0	0	0	0
rno_retrom04652	0	0	0	0	1	0
rno_retrom04651	1	1	0	1	0	62
rnoiretrop43438	22	8	11	0	0	0
rno_retrom04657	0	0	0	0	0	0
rno_retrom04656	0	1	1	4	2	1
rno_retrom04655	0	1	2	1	2	1
rno_retrom04654	3	0	0	0	0	0
rno_retrom04659	0	0	0	0	0	2
rnoiretrop43430	2	0	0	1	0	0
rnoiretrop23846	0	0	0	0	0	0
rno_retrom00091	1	0	0	0	0	0
rnoiretrop45654	0	0	0	0	0	0
rnoiretrop45656	0	0	0	0	0	0
rnoiretrom46616	0	0	0	0	0	1
rnoiretrom24910	0	0	0	0	0	0
rnoiretrom12939	1	0	1	0	0	0
rnoiretrop43384	1	0	0	0	0	6
rno_retrom05380	0	0	0	0	0	1
rnoiretrop30871	0	0	0	0	0	0
rnoiretrop30870	0	0	0	0	0	0
rnoiretrop30877	1	0	0	0	0	0
rnoiretrom47055	0	0	0	0	0	0
rnoiretrop29468	0	0	0	0	0	0
rno_retrop01110	0	0	0	0	0	0
rno_retrom02711	0	3	4	8	5	1
rno_retrom02712	0	1	1	1	0	0
rno_retrom02713	0	0	0	0	0	0
rno_retrop01114	685	451	451	687	329	248
rno_retrom02716	0	1	0	0	1	41
rno_retrom02717	0	0	0	0	0	0
rno_retrop01118	5	2	3	3	5	0
rno_retrom02719	0	0	0	0	0	0
rnoiretrop44526	0	0	0	0	13	0
rno_retrom07380	0	0	0	0	0	0
rnoiretrom04400	0	0	0	0	0	0
rno_retrom07386	4	37	1	441	0	1
rnoiretrop48943	0	0	0	0	0	0
rnoiretrop30384	0	0	0	0	0	0
rnoiretrop51851	0	0	0	0	0	0
rnoiretrom23637	17	0	1	10	1	2
rnoiretrop36438	6	0	0	0	0	0
rnoiretrop06647	0	0	0	0	1	0
rnoiretrom32490	0	0	0	0	0	0
rnoiretrop30658	0	0	0	0	0	0
rnoiretrop35443	0	0	1	0	0	0
rno_retrop00649	1	1	2	1	2	0
rnoiretrom43226	0	0	0	0	0	0
rno_retrom03447	0	0	0	0	0	0
rno_retrom03446	1	0	0	0	0	1
rno_retrop00645	3	2	2	2	0	5410
rno_retrop00643	0	0	0	1	0	0
rno_retrop00642	1	0	0	0	0	1194
rnoiretrop37116	21	55	9	25	12	11
rnoiretrop39931	0	0	0	0	0	1
rno_retrom06264	0	0	0	0	0	0
rno_retrom06267	0	1	1	0	0	1
rnoiretrop38710	2	0	3	1	3	4
rno_retrom06262	4	3	0	1	1	0
rno_retrom06263	0	0	0	4	0	2
rno_retrom06268	0	0	0	0	0	0
rnoiretrop38719	3	0	1	0	0	0
rno_retrom01966	0	0	0	0	0	0
rno_retrom01969	0	0	0	1	0	0
rno_retrom02922	10	0	6	14	9	3
rno_retrom02924	0	0	0	0	0	34
rno_retrom02929	0	0	0	0	0	0
rno_retrom03036	0	0	0	0	0	0
rno_retrom03034	0	1	0	13	1	0
rno_retrop00235	52	47	11	31	18	9
rno_retrop00232	0	0	0	0	0	1
rno_retrom03033	0	0	0	0	0	0
rnoiretrop31525	0	0	0	0	0	0
rno_retrom03541	1615	824	749	496	62	71
rno_retrop01615	0	0	0	0	0	0
rnoiretrom46868	0	0	0	0	0	0
rno_retrom03548	11	6	9	8	5	0
rnoiretrop21839	0	0	0	0	0	4
rnoiretrop22334	0	0	0	0	0	0
rnoiretrop51212	0	0	0	0	0	7
rnoiretrop29703	7	1	7	4	4	2
rno_retrop01345	0	0	0	0	0	0
rno_retrom05264	0	0	0	0	0	1
rno_retrom02547	1	0	4	1	0	2
rnoiretrop21782	0	0	0	0	0	0
rno_retrop01341	0	0	0	0	0	0
rno_retrom05263	0	0	3	0	0	1
rno_retrom02542	0	0	0	0	0	22
rno_retrom05269	3	0	2	2	1	10
rno_retrom00323	5	2	0	2	0	1
rnoiretrop26781	0	0	0	0	0	0
rnoiretrop01962	0	0	0	0	0	0
rno_retrom00326	0	0	0	0	0	22
rnoiretrop44216	0	0	0	0	0	3
rno_retrom00324	10	6	11	6	3	1
rnoiretrop32221	0	0	0	0	0	0
rnoiretrop37365	0	0	0	0	0	0
rnoiretrop37363	0	0	1	0	0	0
rnoiretrom25708	0	0	1	0	0	0
rnoiretrop26433	0	0	0	0	0	0
rno_retrom01365	0	1	0	0	0	0
rno_retrom01361	0	0	0	0	0	0
rno_retrom01362	0	0	1	0	0	2
rnoiretrop34540	2	2	0	1	0	2
rno_retrom00374	0	0	0	0	0	1
rno_retrom00375	0	0	0	1	0	0
rno_retrom00376	0	0	0	0	0	3
rnoiretrop33269	0	0	0	0	0	0
rnoiretrop35637	3	1	0	2	0	1185
rnoiretrop30464	0	0	0	0	0	1
rno_retrop00434	0	0	1	1	1	1
rnoiretrop38486	0	0	0	1	0	0
rno_retrop00430	4	1	0	0	0	66
rnoiretrop38481	3	2	0	1	0	0
rno_retrom03632	15	12	53	26	7	3
rno_retrom03633	17	13	89	3	47	349
rno_retrom03638	0	0	0	0	0	0
rno_retrom03639	1806	1331	2549	3501	4016	1787
rno_retrop02494	0	0	0	0	0	1
rnoiretrop03193	5	7	4	1	0	1
rno_retrop02491	0	0	0	0	0	0
rnoiretrop16381	4	0	0	0	0	1
rno_retrop02493	4	4	1	1	0	13473
rnoiretrop46463	0	0	0	0	0	1
rno_retrop02498	0	0	0	0	0	0
rno_retrop02499	0	0	0	3	1	0
rno_retrop02512	0	2	0	0	0	1
rnoiretrom23284	0	0	0	0	0	0
rnoiretrop41701	0	0	0	0	0	0
rnoiretrop17038	0	0	0	0	0	0
rnoiretrom38937	0	0	0	0	0	5
rnoiretrom03921	238	192	205	300	119	213
rno_retrom06539	0	0	1	0	0	0
rnoiretrop41707	0	0	0	0	0	0
rnoiretrop42566	0	0	0	0	0	2
rnoiretrom25871	1	0	0	0	0	6
rnoiretrop06120	2	0	0	0	0	1
rnoiretrop43174	0	0	0	0	0	0
rnoiretrop00186	1	1	0	2	1	0
rnoiretrop19497	0	0	0	0	0	0
rnoiretrop31735	3	5	1	0	0	0
rnoiretrop31736	2	2	0	0	0	0
rnoiretrom36039	137	81	1	9	0	97
rnoiretrom36033	0	0	0	0	0	0
rnoiretrop24554	0	0	0	0	0	0
rno_retrom05129	2	0	1	3	0	0
rnoiretrop28448	0	1	0	0	0	0
rnoiretrop28444	0	0	0	0	0	0
rnoiretrom18240	2	1	0	0	0	0
rno_retrop01910	636	396	259	405	137	32
rno_retrop01911	0	2	4	18	11	0
rnoiretrop41035	2	0	0	0	0	0
rno_retrop01915	4	1	3	1	0	0
rnoiretrop02314	0	0	0	0	0	0
rnoiretrop04254	0	0	0	0	0	0
rno_retrom07032	0	0	0	0	2	0
rno_retrom07037	0	0	0	0	0	0
rno_retrom07035	9	1	2	4	2	0
rno_retrom07038	0	0	0	0	0	1
rnoiretrop47755	0	0	0	0	0	0
rnoiretrom11173	0	0	0	0	0	0
rnoiretrom30682	0	0	0	0	0	0
rnoiretrom30139	0	0	0	0	0	0
rnoiretrop36179	0	0	0	0	0	0
rnoiretrop26157	0	0	0	0	0	0
rno_retrop00399	0	0	0	0	0	0
rnoiretrom31085	0	2	2	4	3	0
rnoiretrop38903	0	0	0	0	0	0
rno_retrop00394	1	0	0	0	0	0
rno_retrop00397	3	0	1	1	0	0
rnoiretrop37174	0	0	0	0	0	0
rnoiretrop32419	0	0	0	0	0	0
rnoiretrop26334	2	2	1	0	2	2
rnoiretrop26842	543	515	520	849	458	375
rnoiretrop26333	0	0	0	0	0	0
rno_retrom01171	0	0	0	0	0	0
rno_retrom01170	0	0	0	0	0	0
rno_retrom04413	0	0	0	0	1	1
rno_retrom01172	1	2	2	1	2	2712
rno_retrom04414	0	0	0	0	0	50
rno_retrom04418	0	0	0	0	0	0
rnoiretrom17296	0	0	0	0	0	0
rnoiretrop35991	0	0	0	0	0	0
rno_retrom00560	0	3	2	6	2	0
rno_retrom00563	1	0	0	0	0	0
rno_retrom00565	1	1	2	3	19	42
rno_retrom00567	0	0	1	0	4	1
rnoiretrop43777	0	0	0	0	0	19
rnoiretrop35998	0	0	0	0	0	5
rnoiretrop19403	0	2	0	0	0	6
rno_retrom06740	0	3	0	0	0	54
rno_retrom06746	0	1	0	0	0	7
rnoiretrop42828	0	0	0	0	0	0
rno_retrom06749	0	0	0	0	0	7
rnoiretrop42824	88	52	41	429	51	2
rno_retrom01288	0	0	0	0	2	79
rno_retrom04679	0	0	0	0	0	0
rno_retrom04678	1	0	1	0	0	0
rno_retrom04674	0	0	0	0	0	6
rno_retrom04677	0	0	0	0	0	2
rno_retrom04671	0	1	0	0	0	0
rno_retrom04670	0	0	0	0	0	0
rno_retrom04673	0	0	0	0	0	0
rno_retrop02398	0	0	0	0	0	0
rnoiretrop23864	0	0	0	0	0	1
rno_retrop02392	11	8	4	29	6	6
rno_retrop02396	15	10	13	10	6	4
rno_retrop02395	0	0	0	0	0	0
rno_retrop02394	0	0	0	0	0	0
rnoiretrom46630	0	0	0	0	0	0
rnoiretrom38109	1	0	0	0	0	10
rnoiretrom21345	0	0	0	0	0	0
rno_retrom02481	2	2	0	1	1	6
rno_retrom02482	0	1	0	0	0	0
rno_retrop01284	0	0	0	0	0	2
rno_retrom02485	0	0	1	0	0	0
rno_retrom02486	0	0	0	0	0	2
rno_retrop01288	0	0	0	0	0	0
rno_retrop01289	1	2	0	1	1	10
rno_retrom06819	0	6	0	2	8	35
rno_retrom06818	0	0	0	0	0	3
rnoiretrom24648	0	0	2	1	0	0
rnoiretrop37281	0	0	0	0	0	50
rno_retrom06810	0	0	0	0	0	0
rnoiretrop37286	0	0	0	0	0	0
rno_retrom06814	0	0	0	0	0	2
rnoiretrop34738	0	2	0	0	0	0
rno_retrop02538	0	0	0	0	0	5
rnoiretrop33106	0	0	0	0	0	0
rno_retrop02533	4	8	1	3	6	8
rno_retrop02532	16	14	4	16	6	15
rno_retrom05109	0	1	0	0	0	0
rno_retrom05104	251	140	169	196	102	282
rnoiretrop13027	0	0	1	1	0	0
rno_retrom05100	15	21	0	4	1	4
rno_retrom02737	3	2	0	1	1	1
rno_retrom05102	0	0	0	0	0	0
rnoiretrop29011	0	0	0	0	0	0
rnoiretrom05339	0	0	0	0	0	0
rnoiretrop44501	0	0	0	0	0	0
rno_retrom03687	0	0	0	4	0	4
rnoiretrop46612	0	0	0	0	0	0
rno_retrom06719	0	0	0	0	0	1
rnoiretrop37829	0	0	0	0	0	0
rnoiretrop38344	0	0	0	0	0	0
rnoiretrop37821	0	0	0	0	0	0
rnoiretrom26138	0	0	0	0	0	0
rnoiretrop35465	0	0	1	0	0	11
rno_retrom06101	2	0	1	1	0	0
rno_retrom06100	0	0	0	0	0	0
rno_retrom06103	9	10	0	0	0	0
rno_retrom06102	8	11	2	9	2	1
rno_retrop00665	7	8	3	11	3	1
rno_retrop00664	39	4	37	15	0	18
rno_retrop00667	0	0	0	0	0	0
rno_retrop00666	3	2	4	2	1	3
rnoiretrop52297	4	1	5	3	5	0
rnoiretrop23265	0	0	0	0	0	0
rnoiretrop29900	0	0	0	0	0	1
rno_retrom06248	0	1	4	2	1	3
rno_retrom06244	0	0	0	0	0	1
rno_retrom06243	0	0	0	0	0	0
rno_retrom06240	0	0	0	0	0	0
rno_retrom06241	5	1	0	2	0	27
rnoiretrom06811	0	0	0	0	0	0
rno_retrom01902	0	0	0	0	0	20
rno_retrom01903	1	0	0	3	1	0
rnoiretrop08958	0	0	0	0	0	0
rnoiretrop08951	0	0	0	0	0	0
rnoiretrop48070	0	0	0	0	0	0
rno_retrop00258	0	0	0	0	2	0
rno_retrom03059	2	4	1	1	0	100
rno_retrop00250	0	0	0	0	0	29
rno_retrop00251	0	0	0	0	0	0
rno_retrom03052	67	82	31	37	17	250
rno_retrom00713	0	0	0	0	0	0
rnoiretrop31506	0	1	0	1	0	0
rnoiretrom54125	0	0	0	0	0	0
rnoiretrop42611	0	3	0	2	0	0
rnoiretrom40441	0	0	0	0	0	0
rnoiretrop27417	0	0	0	0	0	0
rnoiretrom38357	0	0	0	6	0	0
rnoiretrop51181	0	0	0	0	0	0
rno_retrom07194	0	0	0	0	0	0
rnoiretrop34906	0	0	0	0	0	0
rnoiretrop44343	0	0	0	0	0	0
rno_retrom02909	2	1	68	1	0	0
rno_retrom02908	0	0	0	0	0	1
rnoiretrop39765	0	0	0	1	0	2
rno_retrom02900	0	0	0	1	0	0
rnoiretrop21812	0	0	0	0	0	0
rno_retrop00878	0	0	0	6	0	0
rno_retrop00874	0	0	0	0	0	0
rno_retrop00877	0	0	0	0	0	2
rno_retrop00872	0	0	0	0	0	0
rno_retrop01596	0	0	1	0	0	3
rnoiretrop51235	0	0	1	1	0	1
rnoiretrop32083	0	0	0	0	0	1
rno_retrom05205	3	6	10	8	14	5
rnoiretrom17358	0	0	0	2	1	2
rno_retrom04083	0	0	0	0	0	0
rno_retrom04084	0	0	0	0	0	0
rno_retrom04088	0	0	0	0	0	0
rnoiretrom16554	1	1	3	8	9	0
rnoiretrop44759	0	0	0	0	0	0
rnoiretrop37617	0	0	0	0	0	0
rno_retrom01346	0	0	0	0	0	0
rno_retrom01347	0	0	0	0	0	0
rno_retrom01344	0	0	0	0	0	0
rno_retrom01345	0	0	0	0	0	0
rno_retrom01342	0	0	0	0	0	0
rnoiretrom17979	0	0	0	0	0	0
rno_retrop02705	0	0	0	0	0	0
rno_retrop02706	0	0	0	0	0	0
rno_retrom00350	236	149	81	167	39	113
rno_retrom00351	1	0	0	0	0	7
rno_retrop00418	0	0	0	0	0	0
rno_retrom03619	0	0	0	0	2	0
rno_retrom03616	0	0	0	0	0	0
rno_retrom03614	0	0	0	0	0	0
rno_retrom03615	0	3	11	12	10	24
rno_retrop00412	0	0	0	0	0	0
rno_retrop00413	1	0	4	0	1	50
rno_retrop00410	0	0	0	0	0	0
rno_retrop00411	0	0	0	0	0	0
rnoiretrop47065	0	0	0	0	0	0
rnoiretrop25224	0	0	0	0	0	0
rno_retrom00062	0	0	0	0	0	0
rno_retrom04510	0	0	0	0	0	0
rno_retrom05688	0	0	0	0	0	0
rnoiretrop46442	0	0	0	0	0	0
rnoiretrop40872	1	0	0	0	0	0
rnoiretrop45628	0	0	0	0	0	0
rno_retrop02305	0	1	0	2	0	3
rnoiretrom38911	0	0	0	0	0	1
rno_retrom06659	0	0	0	0	0	0
rnoiretrop06495	0	0	0	0	0	0
rnoiretrop29625	3	0	0	0	0	0
rnoiretrom23402	0	2	0	0	0	119
rnoiretrop25480	1	0	2	0	0	0
rno_retrop02430	0	0	0	0	0	0
rnoiretrop41583	13	9	1	3	2	4
rno_retrop02431	0	0	0	0	0	14
rnoiretrop24574	0	0	0	0	0	0
rnoiretrop51951	0	0	0	0	0	0
rnoiretrop28422	0	0	0	0	0	0
rnoiretrop27889	6	1	4	2	1	0
rno_retrom05904	0	0	0	0	0	0
rnoiretrop41052	0	0	0	0	0	0
rno_retrop01930	0	0	0	0	0	0
rno_retrom02227	0	0	0	0	0	0
rno_retrop01936	4	2	0	0	0	1
rno_retrom05901	2	0	0	0	1	2516
rno_retrom05902	0	0	0	0	0	0
rno_retrom02216	0	0	0	0	1	0
rnoiretrop24687	0	0	0	3	1	0
rno_retrom05909	0	0	0	0	0	0
rnoiretrom11777	1	4	0	0	0	8
rnoiretrop04232	0	0	0	0	0	0
rnoiretrop36999	0	1	1	0	0	20
rnoiretrop36994	0	0	0	0	0	0
rno_retrom00998	0	0	0	0	0	0
rno_retrom00999	0	0	0	0	0	0
rno_retrom00995	0	0	0	0	0	0
rnoiretrop41951	4	2	0	0	0	15
rno_retrom00990	0	0	0	0	0	0
rno_retrom00991	0	0	0	0	0	0
rno_retrom00992	0	0	0	0	0	0
rno_retrom00993	4	1	0	0	0	82
rnoiretrop38690	0	0	0	0	0	0
rnoiretrop38693	0	0	0	1	1	1
rnoiretrom41671	0	0	0	0	0	0
rnoiretrop36194	2	1	0	1	0	0
rnoiretrop36199	0	0	0	0	0	0
rnoiretrop16837	537	534	172	153	65	58
rnoiretrop38969	0	0	0	0	0	0
rnoiretrop26685	0	0	0	0	0	0
rnoiretrop28844	0	0	0	0	0	0
rnoiretrop26687	0	0	0	0	0	0
rno_retrom01118	1	0	1	0	0	5
rnoiretrom07428	1	1	2	1	0	8
rno_retrom01113	0	0	0	0	0	1
rnoiretrop26860	4	4	1	2	0	1
rno_retrom01111	6	9	2	10	2	3
rno_retrom01110	0	1	0	0	0	0
rno_retrom04477	2	3	1	17	9	2
rno_retrom01114	26	18	12	16	0	36
rno_retrom00509	0	0	0	0	0	0
rno_retrom00508	0	0	0	0	0	10
rnoiretrop08239	0	0	0	0	0	8
rnoiretrop08234	0	0	6	0	1	13
rno_retrom00502	0	0	0	0	1	0
rno_retrom00506	0	0	0	0	0	0
rno_retrom06765	0	10	0	0	0	54
rno_retrom06767	0	1	0	0	0	0
rnoiretrop45349	0	0	0	0	0	0
rnoiretrom14899	0	0	0	0	1	0
rnoiretrop42801	0	0	0	0	0	0
rnoiretrom17016	0	0	0	0	0	0
rnoiretrop21483	0	0	0	0	0	0
rnoiretrop21480	0	0	0	0	0	1
rnoiretrop45695	1	0	54	0	0	0
rnoiretrom24409	1	8	1	9	1	5748
rnoiretrop29461	0	0	0	0	0	0
rnoiretrop37110	1	3	3	1	1	0
rnoiretrop01820	3	0	0	0	0	0
rno_retrom06597	0	0	0	0	0	0
rnoiretrop21667	302	125	339	401	241	76
rnoiretrop21669	1	2	1	0	0	1
rnoiretrop17538	0	0	0	0	0	0
rnoiretrop32696	0	0	0	0	0	0
rno_retrom06830	0	0	0	0	0	0
rno_retrom07412	1	0	0	0	2	2
rno_retrop02518	0	0	0	0	1	0
rnoiretrop39186	0	3	0	0	1	0
rnoiretrom04621	2	0	0	0	0	0
rno_retrop02511	0	0	0	0	0	0
rnoiretrop16227	1	0	0	0	0	0
rno_retrom05126	0	0	0	0	0	0
rno_retrom05127	0	2	0	0	0	0
rno_retrom05124	0	0	0	1	0	2
rno_retrom05125	0	0	0	0	0	1
rno_retrom05123	0	0	0	0	0	0
rno_retrom05128	0	0	0	0	0	0
rnoiretrom39982	0	0	0	0	0	0
rnoiretrom30809	0	0	0	0	0	0
rnoiretrop35125	0	0	0	0	0	0
rnoiretrop51729	0	0	0	0	0	0
rnoiretrop44562	0	0	0	0	0	0
rnoiretrop47187	38	23	14	30	20	70
rnoiretrop35267	0	0	1	0	0	0
rnoiretrop51898	0	0	0	0	0	0
rnoiretrom15292	0	0	0	0	0	0
rnoiretrop39111	1459	966	331	549	199	858
rno_retrom03694	0	0	0	0	0	0
rnoiretrop30690	1	1	0	0	0	0
rnoiretrop30697	3601	2202	1533	2254	1054	235
rnoiretrop35409	3	0	8	2	4	2
rno_retrop01897	1	0	0	1	0	1
rno_retrom06161	2	0	0	0	0	0
rno_retrom06160	2	6	1	1	0	0
rnoiretrom47007	0	0	0	0	0	0
rno_retrom03691	0	0	0	0	0	15
rnoiretrop42241	0	0	0	0	0	0
rno_retrom04990	2	1	0	1	0	0
rno_retrom04992	1	0	1	3	3	6
rno_retrom04994	1	0	0	2	0	0
rno_retrom04996	1	1	0	0	1	1
rno_retrom04997	0	0	0	0	0	0
rno_retrom04998	0	0	0	0	0	0
rno_retrom04999	0	0	0	0	0	0
rno_retrop01892	0	0	0	0	0	0
rnoiretrop43033	1	0	1	0	1	0
rnoiretrom04993	0	0	0	0	0	0
rnoiretrop23537	0	0	1	16	11	0
rnoiretrop24210	0	0	0	0	0	10
rnoiretrop23248	1	0	0	0	0	0
rno_retrom00697	0	0	0	0	0	0
rno_retrom00696	2	0	1	1	0	0
rno_retrom06228	0	0	0	0	0	12
rnoiretrop38751	0	0	0	0	0	0
rno_retrom03699	0	0	0	1	0	2
rno_retrom06224	2	0	0	8	0	0
rno_retrom06227	0	0	0	0	0	0
rno_retrom01929	0	0	0	0	0	0
rnoiretrop47860	0	0	1	0	0	0
rnoiretrop44983	0	0	0	0	0	0
rnoiretrom32459	0	0	0	0	0	0
rnoiretrom48820	5	0	1	1	0	0
rnoiretrom48351	0	0	0	0	0	0
rno_retrom06592	0	0	0	0	0	0
rno_retrop00273	0	0	0	0	0	3
rno_retrom06590	2	1	3	0	0	0
rno_retrom06591	0	0	0	0	0	0
rno_retrom03076	1	0	1	3	1	1
rno_retrop00277	1	0	3	2	3	0
rnoiretrop42638	1	0	3	0	0	3
rno_retrop00278	0	0	0	1	0	0
rno_retrop00279	0	0	0	0	0	1
rnoiretrop31565	0	1	0	0	1	0
rno_retrop01895	1	4	2	1	2	2
rno_retrop01894	0	2	0	0	0	0
rnoiretrop42635	2838	1553	1422	1406	621	14260
rno_retrop01891	0	0	0	1	0	1
rnoiretrom36754	0	0	0	0	0	0
rno_retrop00067	0	0	0	0	0	0
rnoiretrom31767	0	0	0	0	0	0
rnoiretrop27439	0	0	0	0	0	1
rnoiretrop29674	0	0	0	0	0	0
rnoiretrop22119	0	0	0	0	0	0
rnoiretrom06743	0	0	0	0	0	0
rno_retrom07172	0	0	0	0	0	0
rnoiretrom30588	0	0	0	0	0	0
rnoiretrom30589	0	0	0	0	0	2
rnoiretrop18701	0	0	0	0	0	0
rnoiretrop48597	0	0	0	0	0	0
rno_retrop00856	0	0	0	0	3	0
rno_retrop00857	0	0	0	0	0	1
rno_retrop00854	1	0	0	0	0	0
rno_retrop00855	0	2	0	1	1	1731
rnoiretrop22379	0	0	0	0	0	0
rno_retrop00851	0	3	0	3	4	0
rno_retrop00858	6	0	0	0	0	5
rno_retrop00859	8	0	0	0	1	0
rno_retrop02068	0	0	0	0	0	5
rnoiretrop35848	0	0	0	0	0	0
rnoiretrop41852	0	0	0	0	0	0
rnoiretrop46806	0	0	0	0	0	0
rnoiretrop46802	1	0	0	0	0	8
rnoiretrop07303	0	0	0	0	0	104
rno_retrom04430	2	0	2	0	0	0
rnoiretrop38119	0	2	7	0	1	0
rnoiretrop38386	2	2	0	0	0	0
rnoiretrop26474	56	30	81	49	61	13
rno_retrom03345	3	0	0	0	1	18
rno_retrom01320	0	0	0	0	0	1
rno_retrom01321	0	0	0	0	0	1
rno_retrom01322	0	0	0	1	0	0
rno_retrom01325	0	0	0	0	0	0
rno_retrom01326	1	0	0	0	0	0
rno_retrom01327	3	2	8	2	8	0
rno_retrom01328	0	0	0	0	0	0
rno_retrom01329	2	0	0	0	0	9
rno_retrom00331	0	0	0	0	0	0
rnoiretrop42154	0	1	0	0	0	0
rnoiretrop45576	18	23	8	2	1	2
rno_retrom03679	0	0	0	1	0	8
rnoiretrop42507	0	0	0	0	0	0
rno_retrom03670	0	0	0	0	0	0
rno_retrop00471	0	0	0	0	0	7
rno_retrop00473	2	0	0	0	0	26
rno_retrop00474	2	0	0	1	0	0
rno_retrom03675	0	1	0	0	0	2
rno_retrop00476	0	2	0	3	0	0
rno_retrom03677	0	0	0	0	0	4
rnoiretrop47044	0	0	0	0	0	0
rnoiretrop47517	0	0	0	0	0	0
rnoiretrop21291	176	78	173	183	144	36
rnoiretrop29325	0	0	0	0	0	442
rno_retrom04463	0	0	0	0	0	0
rno_retrom04467	0	0	0	0	0	0
rnoiretrop34671	149	159	106	173	62	83
rno_retrop01078	0	0	25	1	0	0
rno_retrop01077	0	0	0	0	0	0
rno_retrom02676	0	0	0	0	0	0
rno_retrop01074	35	39	16	10	0	3
rno_retrom02673	0	0	0	0	0	1
rno_retrop01072	0	0	0	0	0	0
rno_retrom02670	0	0	0	0	0	1
rnoiretrop35678	0	0	0	0	0	0
rno_retrom00164	0	0	0	0	0	0
rnoiretrop25977	0	0	1	0	0	5
rnoiretrop39793	0	0	0	0	0	0
rno_retrop02242	1	2	1	2	0	0
rnoiretrop50627	1	0	2	1	0	1
rnoiretrom36561	0	0	0	0	0	1
rnoiretrop05653	0	1	0	0	0	1
rnoiretrop02686	0	0	0	0	0	0
rnoiretrop45918	1	0	1	0	0	9
rnoiretrop17073	0	0	0	0	0	0
rno_retrop02892	0	0	1	1	0	0
rno_retrop02893	0	0	0	0	0	0
rnoiretrop25606	2	2	3	0	0	0
rnoiretrop20985	0	0	0	0	0	0
rno_retrom05928	4399	3338	3615	6062	2692	1265
rno_retrom05929	5	6	14	18	13	4
rno_retrom02206	0	2	0	1	0	0
rno_retrom02204	0	0	0	0	0	3
rno_retrom02205	0	0	0	0	0	0
rno_retrom02202	1	0	2	0	0	3
rnoiretrom26562	87	66	37	58	24	15
rnoiretrom11759	0	0	0	0	0	0
rnoiretrop30572	0	0	0	0	0	0
rnoiretrom44151	0	0	3	0	0	1
rnoiretrop42456	1	0	1	0	0	0
rnoiretrom11134	0	0	0	0	0	0
rno_retrom03208	0	0	0	0	0	0
rnoiretrop36484	8	5	2	2	0	0
rnoiretrop28404	14	9	0	0	0	0
rnoiretrop26116	1	0	1	1	0	0
rnoiretrop39896	0	0	0	0	0	0
rnoiretrom19623	0	0	0	0	0	0
rnoiretrop23760	0	0	0	0	0	0
rnoiretrop16854	66	90	42	46	15	169
rnoiretrop38945	0	0	0	0	0	1
rnoiretrom19658	0	0	0	0	0	0
rno_retrom04327	0	0	0	2	0	0
rnoiretrop26802	0	0	0	0	0	0
rno_retrom01131	1	0	0	0	0	97
rno_retrom04321	1	2	4	1	1	1
rno_retrom01132	1	0	0	0	0	7
rno_retrom01138	9	5	8	16	1	1
rno_retrom04328	0	0	0	0	0	0
rno_retrom00524	6	3	0	1	1	0
rno_retrom00521	0	0	0	0	0	2
rno_retrom00520	19	19	1	4	1	1
rno_retrom00522	42	28	15	12	6	0
rno_retrom00529	0	0	0	0	0	86
rno_retrom00528	0	0	0	0	0	1
rnoiretrop11617	0	0	0	0	0	0
rnoiretrop42863	0	0	16	0	0	1
rno_retrom05336	0	0	0	0	0	0
rnoiretrop32323	0	4	0	0	0	0
rnoiretrop34449	1	1	1	1	0	0
rno_retrop01244	0	0	0	0	0	0
rno_retrom05497	9	16	14	17	6	8
rnoiretrop21602	0	0	0	0	0	0
rno_retrop01247	1	3	0	4	1	0
rno_retrop01240	0	0	0	1	0	0
rno_retrom02441	1	0	1	0	0	0
rno_retrom05490	1	1	1	3	0	2
rno_retrom05491	5	1	1	2	0	0
rno_retrom02448	0	0	0	0	0	129
rno_retrom05499	4	2	7	3	2	12456
rno_retrom07434	2	1	0	2	15	3
rno_retrom07432	0	0	0	3	0	0
rno_retrom07438	0	0	0	0	0	0
rno_retrop02571	0	2	0	9	0	0
rno_retrop02570	1	0	0	8	0	0
rno_retrop02574	8	13	32	36	27	1
rno_retrop02579	3	1	6	4	11	3
rno_retrop02578	0	0	0	1	0	2
rnoiretrop40933	0	0	0	0	0	1
rnoiretrop46035	6	4	13	19	13	6
rnoiretrop29054	0	2	0	0	0	1
rno_retrom05143	0	0	0	0	0	0
rno_retrom05144	0	0	0	0	0	0
rno_retrom05145	0	0	0	0	0	3
rno_retrom05148	5	2	0	0	3	4253
rno_retrom05149	191	175	88	144	50	90
rno_retrop01781	6	5	9	6	6	1
rnoiretrop44543	0	0	0	0	1	0
rnoiretrop44541	0	0	0	0	0	0
rnoiretrop37794	7	17	19	48	2	158
rnoiretrop41681	0	0	0	0	0	0
rnoiretrop35796	0	0	0	0	0	0
rnoiretrop38301	0	0	0	0	0	0
rnoiretrop33781	0	0	0	0	0	7
rnoiretrop38308	0	0	0	0	0	0
rnoiretrop35428	4	0	0	0	0	1
rnoiretrop11858	9	5	21	7	18	6
rnoiretrop30147	29	7	0	0	0	0
rno_retrom06149	1	1	0	0	0	0
rno_retrom06148	0	0	0	0	0	0
rno_retrom06145	4	0	1	2	0	0
rno_retrom06144	0	0	0	0	0	0
rno_retrom06146	1	1	0	0	0	1
rno_retrom06140	0	0	1	0	0	0
rno_retrom06143	0	0	0	0	0	0
rno_retrom06142	0	0	0	0	0	2
rnoiretrop42268	0	0	0	0	0	0
rnoiretrom39038	0	0	0	0	0	0
rnoiretrop43016	5	1	0	0	0	14
rnoiretrop29940	1	0	0	0	0	31
rnoiretrop48309	0	1	0	1	0	0
rno_retrom06202	0	0	0	0	0	0
rno_retrom06203	1	0	0	0	0	2
rnoiretrop00202	902	1185	873	1516	655	1285
rno_retrom06206	1	0	0	0	0	0
rnoiretrop38774	0	0	0	0	0	0
rnoiretrop25858	6	6	10	11	4	6
rnoiretrom47612	4	0	2	4	2	1
rno_retrom03533	0	1	0	0	0	0
rnoiretrom43821	0	0	3	0	0	0
rnoiretrom44834	422	250	881	923	617	423
rno_retrop00736	1	0	0	0	1	2
rno_retrom02456	1	0	0	0	0	0
rnoiretrom36735	0	0	0	0	0	4
rno_retrom05333	0	0	0	0	0	0
rnoiretrop23514	127	80	4	5	1	2
rnoiretrop24232	1	1	1	0	0	0
rnoiretrom00607	0	0	0	0	0	0
rnoiretrop29611	0	0	0	0	0	0
rno_retrom05330	0	0	0	0	0	0
rnoiretrop29614	0	0	0	0	0	0
rnoiretrom49975	0	0	0	0	0	0
rnoiretrom06726	0	0	0	0	0	0
rnoiretrom49970	0	0	0	3	0	0
rnoiretrop37563	2	1	0	0	0	66
rnoiretrop50554	0	0	0	1	1	4
rno_retrom07153	0	0	0	0	2	0
rno_retrom07152	1	0	1	0	1	0
rno_retrom07156	0	0	0	2	0	4
rnoiretrop44308	0	0	0	0	0	0
rno_retrom07158	3	1	1	1	0	3
rno_retrop00833	0	0	0	0	0	0
rno_retrop00834	0	0	0	0	0	0
rno_retrop00835	0	0	0	0	0	0
rno_retrop00837	0	0	0	0	0	0
rno_retrop00839	0	0	0	0	0	0
rnoiretrop50088	74	62	10	59	26	9
rnoiretrop25459	0	0	0	0	0	0
rnoiretrop41879	0	0	0	0	0	0
rnoiretrom45871	0	0	0	0	0	0
rnoiretrom29304	0	0	0	0	0	0
rnoiretrom01559	205	196	24	44	20	9
rno_retrom07429	2	1	0	1	0	2
rnoiretrom03774	235	176	288	236	149	119
rnoiretrop37302	0	0	0	0	0	0
rnoiretrop38175	0	0	0	0	0	9
rno_retrom01308	0	0	1	0	0	0
rno_retrom01309	0	0	0	1	0	0
rno_retrom04158	0	0	0	0	0	0
rno_retrom01302	0	0	0	0	2	0
rno_retrom01300	0	0	0	0	0	2
rno_retrom04151	0	0	0	3	0	0
rnoiretrop12213	4	5	1	3	5	1
rno_retrop02748	0	0	0	0	0	1
rno_retrom00319	0	0	0	0	0	2
rno_retrop02740	0	0	0	0	0	1
rno_retrop02742	0	0	0	0	1	6
rno_retrop02743	1	0	1	3	0	0
rno_retrop02744	0	0	0	0	0	0
rno_retrop02745	2	1	7	7	17	4
rno_retrom00314	0	0	0	0	0	0
rno_retrop02747	2	1	1	0	1	1
rno_retrom06507	0	2	0	0	0	0
rnoiretrop45559	0	0	0	0	0	0
rno_retrop00453	0	0	1	1	0	7
rno_retrom03650	0	0	1	0	0	1
rno_retrom06506	4	0	0	5	2	0
rno_retrom03656	18	6	33	0	1	1
rno_retrom03657	2	2	0	219	61	0
rno_retrom03655	1	4	3	0	0	0
rno_retrom06501	0	1	0	0	0	0
rno_retrom03658	1	0	1	1	0	0
rnoiretrop47023	0	0	0	0	0	0
rnoiretrom33287	0	0	0	0	0	0
rno_retrom03671	0	1	0	0	22	0
rno_retrom02141	2	0	1	1	1	0
rno_retrom03674	1	0	0	2	0	3
rno_retrop00475	4	1	1	1	5	0
rnoiretrop34307	25	23	53	33	34	12
rnoiretrop40925	0	0	0	0	0	0
rnoiretrop34653	46	25	0	2	5	15
rno_retrom02144	0	0	0	2	0	2
rno_retrom02659	0	0	0	0	0	0
rno_retrop01058	0	0	0	0	0	0
rno_retrom02651	6	5	3	1	1	0
rno_retrop01050	0	0	0	0	0	10
rno_retrom02653	1	1	1	9	0	53
rno_retrom02652	2	0	6	0	0	0
rno_retrom02655	2	0	0	0	0	0
rno_retrop01054	3	4	5	8	3	0
rno_retrop01057	0	0	0	0	0	0
rno_retrop01056	0	0	0	0	0	0
rnoiretrop25917	0	0	0	0	0	0
rnoiretrop29062	381	186	100	231	87	141
rnoiretrop24533	0	0	0	0	0	0
rnoiretrop05630	1	0	0	2	1	1
rnoiretrop45975	0	0	0	0	0	113
rnoiretrom23224	0	0	0	1	0	0
rnoiretrop41092	0	0	0	0	0	0
rno_retrom02261	0	0	0	1	0	0
rno_retrom02263	0	0	0	1	1	0
rno_retrom02266	0	0	0	0	0	0
rnoiretrom09397	0	0	0	0	0	0
rnoiretrop30554	0	0	1	1	0	0
rnoiretrop28395	762	295	2	7	0	80
rnoiretrom47809	0	0	0	0	0	0
rnoiretrop36229	0	0	0	0	0	0
rnoiretrop24394	0	0	0	0	0	1
rnoiretrop24147	0	0	0	0	0	0
rnoiretrop27842	0	0	0	0	0	0
rno_retrom01687	0	0	0	0	0	1
rno_retrom01686	0	0	0	0	0	0
rno_retrom01685	0	0	0	0	0	0
rno_retrom01684	0	0	0	0	0	0
rno_retrom01682	0	0	0	0	0	1
rno_retrom02888	0	0	0	0	0	0
rno_retrom02884	12	8	3	242	1	5
rno_retrom02886	1	1	0	0	0	1
rno_retrom02880	0	0	0	0	0	0
rno_retrom02881	1	0	0	1	4	0
rnoiretrop23700	0	0	0	1	0	0
rnoiretrom48783	0	0	0	0	0	0
rnoiretrop48116	0	0	0	0	0	0
rno_retrom06416	1	0	0	0	0	3
rno_retrom06415	0	0	0	0	0	1
rno_retrom06413	0	0	0	0	0	0
rno_retrom06411	0	0	0	0	0	7
rno_retrom06410	0	0	0	0	134	0
rno_retrom06418	0	0	0	0	0	0
rnoiretrom46453	0	0	0	0	0	0
rnoiretrop18045	0	0	0	0	0	0
rnoiretrom13260	0	0	0	0	0	0
rno_retrom04304	0	0	0	0	0	0
rnoiretrop43795	0	0	0	0	0	0
rnoiretrop43791	0	0	0	0	0	0
rnoiretrop45300	0	0	0	0	0	0
rnoiretrop42705	0	0	0	0	0	0
rnoiretrom16726	0	0	4	0	0	0
rnoiretrop42848	0	0	0	0	0	0
rnoiretrop42845	0	0	0	0	0	0
rnoiretrop34883	0	1	0	0	0	6
rnoiretrop29420	0	0	0	0	0	0
rnoiretrop27666	62	19	5	11	2	730
rnoiretrop29428	0	0	0	0	0	0
rnoiretrop26398	1	0	0	0	0	2
rnoiretrop26824	10	8	11	2	0	8
rnoiretrop50346	1	1	0	1	1	4
rno_retrop02082	0	2	0	0	0	0
rno_retrom02469	0	0	0	0	0	0
rno_retrom02466	0	0	0	0	0	0
rno_retrom02467	0	0	0	0	0	0
rno_retrom02464	0	0	0	0	1	378
rno_retrop02088	0	0	2	2	0	0
rno_retrom02462	1	0	0	0	0	0
rno_retrom02463	0	0	0	0	0	0
rno_retrop01260	0	0	0	0	0	0
rno_retrom05301	0	0	0	0	0	0
rno_retrop01198	3	2	1	1	0	1
rno_retrop01199	3	0	0	0	0	14
rno_retrom05168	0	0	0	0	0	1
rnoiretrop46017	0	0	0	0	0	0
rno_retrom05163	0	0	0	0	0	0
rno_retrom02794	0	0	0	0	0	4
rno_retrom05164	0	0	0	1	0	3
rno_retrom05165	0	0	0	0	0	0
rno_retrop01188	4	2	6	18	2	5
rnoiretrop38096	0	0	4	1	1	0
rnoiretrop26530	0	0	0	0	0	0
rnoiretrop35227	0	0	0	0	0	0
rnoiretrop30305	0	0	0	0	0	0
rnoiretrop37512	5558	3309	1994	3840	2278	5350
rnoiretrop37843	0	0	0	3	4	0
rnoiretrom25179	0	0	0	0	0	0
rnoiretrom52377	0	0	0	0	0	1
rnoiretrop23954	0	0	0	0	0	0
rno_retrop02559	0	0	0	0	0	0
rno_retrop02558	2	0	2	3	1	3
rno_retrop02229	0	0	0	0	0	1
rnoiretrop34790	14	5	13	6	0	0
rno_retrop02225	0	0	0	0	0	0
rno_retrop02224	1	0	0	0	0	0
rno_retrop02223	1	1	0	0	0	0
rnoiretrop34795	0	0	0	0	0	0
rno_retrop02553	0	0	0	0	0	0
rno_retrop02552	0	0	0	0	0	0
rnoiretrop11832	0	0	0	0	0	0
rnoiretrop14539	1	4	2	6	3	0
rno_retrom04957	0	1	1	2	1	5
rno_retrom04951	0	0	0	0	0	1
rno_retrom04952	22	9	2	9	8	6
rno_retrom04953	1	0	0	0	0	1
rno_retrom04958	1	2	0	0	0	0
rno_retrom04959	0	1	2	2	0	6
rnoiretrop36094	1	0	0	1	0	0
rnoiretrop45099	0	3	2	12	12	0
rno_retrop01182	3	0	0	1	0	1
rnoiretrop47821	0	0	0	0	0	0
rno_retrom00582	16	8	3	2	1	0
rno_retrop02152	0	1	0	0	0	0
rno_retrop02154	0	0	0	0	0	0
rno_retrom05568	0	0	1	0	0	0
rno_retrop01180	0	0	0	0	0	0
rnoiretrom51123	0	0	0	0	0	1
rno_retrop02156	0	0	0	0	1	0
rnoiretrop31219	72	32	8	4	1	8
rnoiretrom36719	2	3	0	0	0	3
rno_retrop01855	0	0	1	0	0	0
rno_retrop01859	0	0	0	0	0	0
rno_retrop01858	0	0	0	0	0	1
rnoiretrop29966	0	0	0	0	0	0
rnoiretrop24254	0	0	0	0	0	6
rnoiretrop27475	0	0	0	0	0	11
rnoiretrop29637	0	0	0	0	0	0
rnoiretrom06709	5	0	0	3	1	0
rnoiretrop51166	0	0	0	0	0	0
rno_retrom07139	0	0	0	0	0	0
rno_retrom07138	0	0	0	0	0	0
rnoiretrop44859	3	0	0	0	0	2
rno_retrom07133	0	0	1	0	0	0
rno_retrom07132	11	10	16	6	0	0
rnoiretrop50574	0	0	0	0	0	2
rno_retrom07130	0	0	0	0	0	1
rnoiretrop44850	1	2	4	9	3	13
rno_retrom07136	0	0	0	1	0	1
rno_retrom07135	0	1	0	0	0	0
rno_retrom07134	1	0	0	0	0	3
rnoiretrop18212	0	0	0	0	0	0
rno_retrop00610	1	2	1	1	0	7527
rnoiretrom49049	1	0	0	0	0	0
rno_retrom06397	0	0	0	0	0	0
rnoiretrop07284	0	0	0	0	0	0
rno_retrom02534	0	0	0	0	0	0
rnoiretrop01612	6	9	2	4	4	8
rnoiretrom13923	24	22	99	983	1089	98
rnoiretrop41324	0	0	0	0	0	0
rno_retrom02535	0	3	1	1	0	3
rnoiretrop21772	1	0	0	0	0	0
rnoiretrom50451	22	9	18	30	22	22
rnoiretrom45893	0	0	0	0	0	0
rnoiretrop32797	184	41	5	3	2	3
rnoiretrop26707	0	0	0	0	0	0
rnoiretrop26709	0	0	0	0	0	0
rno_retrom00486	0	0	0	0	0	0
rno_retrom00487	0	1	0	0	0	0
rno_retrom00484	0	0	0	0	0	1
rno_retrom01223	0	0	0	1	0	0
rno_retrop00816	1	2	0	0	0	26
rnoiretrop32174	0	0	0	1	0	0
rnoiretrop37678	1	1	0	1	1	2
rno_retrom04174	0	0	0	0	1	0
rno_retrom04175	0	0	0	0	0	0
rno_retrom04172	0	0	0	0	0	0
rno_retrom04173	0	0	0	1	0	0
rno_retrom04170	0	1	0	0	0	0
rnoiretrop51970	0	0	0	2	0	0
rno_retrom00059	0	1	3	1	0	0
rno_retrom04179	0	0	0	0	0	1
rnoiretrop45533	3	5	2	0	2	0
rnoiretrop45537	0	0	0	0	0	0
rnoiretrop42075	0	0	0	0	0	0
rnoiretrop43246	0	0	0	0	0	0
rnoiretrom53985	3	1	4	1	2	0
[truncated: 4,276 more rows]

## Sheet: Opossum
# Supplemental Table S2: Retrocopy expression (≥1 unique read) in opossum
[truncated: 3,039 more rows]

[truncated: 2 more sheets: Platypus, Chicken]
