# Supplementary material for: The life history of retrocopies illuminates the evolution of new mammalian genes
Source: HighWire-hosted journal article supplement (doi:10.1101/gr.198473.115), 2016-01-04
Supplement: Supplemental_Tables.zip [file Supplemental_Table_S3.xlsx]

## Sheet: Human
# Supplemental Table S3: Retrocopy expression in human
# Expression data are in FPKM; each value corresponds at the median FPKM across all samples from that organ
retro_ID	Brain	Cerebellum	Heart	Kidney	Liver	Testis
hsa_retrom16935	0	0	0	0	0	2.14171
hsa_retrom00812	0.275174	0.37485	0.17163	0	0	6.98465
hsa_retrop08870	0	0	0	0	0	26.314
hsa_retrom35552	0	7.03903	0	0.74333	0	0
hsa_retrop13786	0	0	0	0	0	15.9189
hsa_retrop16508	0	0	0	0	0	52.7971
hsa_retrop06597	0	0	0	0	0	14.7712
hsa_retrom09188	1.23124	0.716018	0	0	0	0.214662
hsa_retrop22050	0	0	0	0	0	11.0138
hsa_retrop25310	0	24.1665	0	0	0	0
hsa_retrom01069	0	0	0	0	0	3.19048
hsa_retrop38095	0	0	0	0	0	7.17356
hsa_retrom24569	0	0.0500256	9.96854	0	0.264956	102.665
hsa_retrop25100	1.12213	2.58455	1.01474	0.396496	0.31974	0.57881
hsa_retrom24961	1.38979	4.25014	2.9114	4.40616	4.32596	1.66739
hsa_retrom15135	0	0.626296	0	0	0	2.27487
hsa_retrom30179	0	0	0	0.0827902	0.274677	1.08275
hsa_retrom32083	0	1.19513	0	0	0	0
hsa_retrop34854	0	0	0	0	0	2.10262
hsa_retrop01729	0.837535	0.592277	0.727852	1.38678	1.4152	0.815463
hsa_retrom28393	0	0	0	0	0	3.4574
hsa_retrom16120	0	3.27724	9.24791	12.2188	5.26106	2.51579
hsa_retrom28536	0	0	0	1.63731	0	3.73293
hsa_retrop05893	0	0.0655182	0.289039	0.147789	0	1.51595
hsa_retrom14185	1.60014	0.470194	0	0.797421	0	0
hsa_retrom30792	1.89228	0.319745	0.588598	0	0	2.94248
hsa_retrom31563	0	0	0	0	0	2.68228
hsa_retrom11399	0	0.217762	0.983625	0	0	1.16696
hsa_retrop37891	0	1.20137	0	3.66413	3.37243	0.37075
hsa_retrom25163	0	0	0	0	0	1.03889
hsa_retrop21604	90.9513	64.241	117.295	65.7067	72.6532	34.1054
hsa_retrom01308	3.50466	2.41948	2.66699	1.70707	2.0875	3.73697
hsa_retrop01785	2.05438	2.26971	0.662706	0.363687	0	0.103573
hsa_retrom41358	3.88347	5.19975	1.12287	1.17747	1.50597	0.759871
hsairetrop28971	0	0	0	0	0	1.63187
hsa_retrop12739	0	0	4.39785	1.82778	0	2.02992
hsa_retrop09153	0	0	0	0	0	2.17311
hsa_retrom09616	0	0	0	0	0	1.73558
hsa_retrop28158	0.257743	0	0.47896	3.28828	0	5.79374
hsa_retrom39045	0	4.46424	5.79196	18.4602	0	4.46656
hsa_retrop21238	2.25194	2.60867	2.48386	2.19686	1.849	1.29171
hsa_retrop25927	0	0	0	0	0	1.68017
hsa_retrop13389	1.48252	0.305284	0.176194	0	0	1.44453
hsa_retrop16159	1.08148	1.54288	0.814346	0.444217	0.223103	0.463623
hsa_retrop09348	3.02037	2.51569	0.681116	2.64698	1.13871	1.35104
hsa_retrop08908	0	0.659741	5.14655	0	2.65387	0
hsairetrom17263	0	0	0	0.318464	1.39457	0.0313342
hsa_retrom36664	17.8278	18.9279	1.21466	4.55635	0.621569	2.37338
hsa_retrop13418	0	0	0	0	0	2.66561
hsa_retrop44318	2.24256	0.558154	0	0	0	0.782434
hsa_retrom29711	0	0	0	0	0	25.2317
hsairetrop15481	0	2.92955	1.69873	1.00704	0	2.34707
hsa_retrom38978	9.09907	8.51267	7.29118	3.69394	6.52217	1.6634
hsa_retrop15796	0.519159	1.46537	1.01126	0.596591	1.03704	1.82036
hsa_retrop03757	1.09583	0.201169	1.11469	1.2519	1.49502	0.375005
hsa_retrop42371	0.197813	0.643893	1.02253	1.85225	1.69253	0.271386
hsa_retrop38679	0	0	0	0	0	1.4196
hsa_retrom10036	0	0.295687	0	1.40942	0	1.8049
hsa_retrom19154	2.88268	4.63566	2.69414	2.79983	0.433952	3.43788
hsa_retrom26906	1.36011	1.52088	0	0	0	5.67436
hsa_retrom29100	0	0.147455	0	0	0	1.322
hsa_retrop25796	1.13486	1.40936	1.87314	2.61174	2.14924	2.26719
hsa_retrop44398	1.77507	2.36412	3.0528	5.67075	11.9427	0.698903
hsa_retrom32131	0	0	0	0	0	1.14598
hsairetrop37208	3.35021	2.82531	3.11401	2.73559	2.19975	2.34729
hsa_retrop00372	0	0.101662	0	1.1128	0	0.141747
hsa_retrop44213	0.917903	1.00535	0	0	0	0
hsa_retrop08588	0	3.3005	0.833681	1.29585	1.77768	1.13696
hsa_retrop27853	0	0.237234	1.51472	0	1.06465	0
hsa_retrom01098	0	0	0	31.456	0.913144	0.269527
hsa_retrop25623	0	1.59333	0	0	0	0
hsa_retrom27210	0	1.17579	0	0	2.91862	5.09204
hsa_retrop41275	7.56884	10.2374	11.5638	7.66056	6.17978	5.00713
hsairetrop40022	23.9926	26.0693	10.7856	6.39122	9.13541	2.09286
hsa_retrom39356	4.65704	2.88181	0.788327	3.49928	0.62232	1.67869
hsa_retrom36550	0	0.348473	2.28648	0	0	4.70302
hsa_retrom32073	28.7484	29.6271	50.6868	23.4881	32.0662	37.112
hsa_retrom40349	0	0	0	0	0	58.6236
hsa_retrom29346	1.53114	1.09337	0	0	0	0
hsa_retrop34768	0.824564	0.566126	0.484789	0.622116	0.81168	4.07935
hsa_retrom16178	0	0	0	0	0	9.88654
hsa_retrop02787	0.818681	0.947695	1.44608	0.926866	2.07825	0.584107
hsa_retrom40066	0	0	0	0	0	23.9518
hsa_retrop03433	0	0.0858928	2.1717	0.405091	1.13261	0.97123
hsa_retrop16950	27.594	13.3603	31.858	30.8716	20.3655	17.5027
hsa_retrom42356	0	0	0	0.216186	0	3.08602
hsa_retrom26428	0.760432	1.69278	0.518154	0.738306	0.601462	0.670119
hsa_retrom15096	16.3052	15.8976	14.8931	88.7937	232.555	6.72128
hsa_retrom37258	0	10.1991	0	0	0	5.94522
hsa_retrop10824	1.15394	0	5.49407	6.69847	0	0
hsa_retrop43189	4.86204	3.88201	2.58029	2.11886	6.67483	4.46749
hsa_retrop43181	7.39907	1.89098	0	1.06186	0	9.05321
hsa_retrop31404	0	4.06986	3.40621	6.11781	9.54064	0
hsa_retrom40921	0	0	0	0	0	3.59065
hsa_retrom08913	0	0	0	0	0	1.15259
hsa_retrop36763	1.33111	1.49537	0.338051	0.178846	0	0.139164
hsa_retrop25951	1.74141	2.13151	1.06063	1.53321	0	0.497965
hsa_retrom15569	0	0	0	0	0	1.0944
hsa_retrop16108	0	0	0	0	0	2.60259
hsa_retrop10420	1.46036	2.01635	0.630916	0.866492	0	2.66188
hsa_retrop10427	0.334961	0.238381	0	0	0	7.15163
hsa_retrom40747	0	0	0	0	0	2.75842
hsa_retrop34695	4.49758	7.63023	0	0	0	8.14097
hsa_retrom30127	0.464769	1.59074	0.517559	1.59761	0.29501	0.0904327
hsa_retrop25503	2.93292	3.43257	5.5461	6.42054	7.47346	9.13012
hsa_retrom31387	0	0.802911	0	0.73322	2.33095	0.338177
hsa_retrop21972	86.4198	114.368	169.575	171.801	219.209	92.9853
hsa_retrop42608	0	0	0	0	0	5.28615
hsa_retrop43557	0	0	0	0	0	29.2091
hsa_retrop21156	2.93238	4.48059	3.24696	3.47889	5.04416	1.28835
hsa_retrop03315	0	0	0	0	0	1.70463
hsa_retrom42350	1.3665	0.0979601	0	0	0	1.1768
hsa_retrop11442	4.3931	4.32301	1.77098	2.56451	1.31935	0.81496
hsa_retrom35444	0.325346	0.24457	1.01409	0.703476	0	0.564508
hsa_retrop18511	0.920546	1.83253	0	0.662818	0	0.196281
hsairetrom26653	0	1.63317	0.561577	0.438534	0	0.351806
hsa_retrop16032	0.650545	1.36228	2.69275	1.20999	0	0.807716
hsa_retrop38049	0	0	0	0	0	1.64067
hsa_retrom00937	0	6.02546	6.33365	4.89592	3.94964	1.98365
hsa_retrom14115	0	0	0	0	0	2.57104
hsairetrop21141	9.08279	4.47775	0	12.0275	0	0.123743
hsa_retrom39881	0	0	1.09469	0	0	0
hsa_retrop10873	0	0	0	0	0	1.26695
hsa_retrom40893	0	0	0	0	0	1.66182
hsa_retrom29965	0	0.174659	0	0	0	1.09079
hsa_retrop06662	0	0	0	0	1.24593	0
hsairetrom11641	0.198547	0.0813154	0.564453	5.6933	5.4716	1.04286
hsa_retrom28206	0	0.70138	0	0	1.34135	0
hsa_retrom14451	0.903169	0.925999	1.15541	0.996494	1.56242	0.47586
hsa_retrom19225	2.48107	4.68667	2.63213	1.08727	2.15128	2.32953
hsa_retrom34887	0	0	0	0	0	1.07907
hsa_retrom30469	0	0	0	0	0	32.4484
hsa_retrom40913	0.318522	0	0	0.233679	1.61655	0.408023
hsa_retrom28592	0	0	1.88251	0	0	0
hsa_retrom28068	2.9469	0.918175	2.87204	2.77468	0	2.77656
hsa_retrom42405	2.77986	1.59576	4.6672	5.50923	12.6346	1.59941
hsa_retrop05507	0	0	0	0	0	4.09318
hsa_retrop09436	0.927308	0	1.10615	0	1.00588	1.36106
hsa_retrop42310	0	0	0	0	0	19.5642
hsa_retrom22262	0.890046	0.259184	0.425325	0.689741	0.499855	11.5772
hsa_retrop13991	0.678818	1.35973	0	0	0	0
hsa_retrop43423	0	0	0	0	0	4.1988
hsa_retrop14076	11.0504	8.26553	6.83909	5.29758	3.71489	2.81431
hsa_retrop40875	0	0	0	0	0	1.98093
hsa_retrom29730	0	1.07325	0	0.131451	0	0
hsa_retrom37967	0	0	0	0	0	4.62838
hsairetrop24010	0	0	0	0	0	1.77788
hsa_retrom10489	0	0	0	0	0	1.51294
hsa_retrom28363	1.733	1.37641	0.928803	1.79054	2.51136	1.16772
hsa_retrop11436	3.63377	4.03982	2.35113	4.38031	5.70857	1.71962
hsairetrop06330	0	0	0	0	0	2.8391
hsa_retrop29306	0	0	0	0	0	1.84958
hsa_retrop24247	0.153189	0.094454	0.742873	0.0862891	0	2.23905
hsa_retrop41295	0	0.349971	0	1.04474	0	0.83337
hsa_retrop14545	0	0	0	0	0	3.19151
hsa_retrop38716	0	0	0	0	0	1.40919
hsa_retrom09707	1.78707	0.386981	0	0.194859	0	0.55637
hsa_retrom28460	1.3618	0.763077	0.688353	0	0	0
hsa_retrom41695	1.70109	2.72207	0.617299	0.46848	0	0.169956
hsa_retrom36070	0	0	0	0	0	2.56991
hsa_retrop37247	0.837536	1.77138	0.591781	3.40197	6.79158	0.133084
hsa_retrom17205	3.19922	5.03464	5.58886	5.70491	3.47943	3.76806
hsa_retrop21106	3.70679	4.14896	6.23938	4.86477	2.97687	6.19663
hsa_retrom07729	0	0	0	0	0	1.36948
hsa_retrop34844	10.9187	12.2212	9.68164	10.4575	8.81986	7.52329
hsa_retrop34597	26.8706	25.5667	0	0.117016	0	7.23236
hsa_retrop16833	0	0	0	0	0	142.11
hsa_retrom18615	0.125789	0.175754	0	1.52443	10.9388	0
hsa_retrop18784	0.249009	0.23225	0	0	0	1.56967
hsa_retrom27178	0	2.19667	0	0	0	0.247531
hsa_retrop32129	2.25298	0.405216	0.370012	0	0	0.289969
hsa_retrop21638	1.72798	0.719288	0	0.447225	4.10923	0
hsairetrom10531	0	0	0	0	0	2.19409
hsa_retrop16660	0	0	0	0	0	3.63002
hsa_retrop15316	0	0	0	0	0	2.18689
hsa_retrom27038	1.08492	0.7592	1.14499	3.14209	1.01531	1.59116
hsa_retrop11086	0.338791	0.0584308	0	0	0	1.50974
hsa_retrop25874	0	0	0	0	0	1.12713
hsa_retrom29909	0	0	0	0	0	47.7373
hsa_retrop43829	44.3021	49.2883	46.2099	44.5025	33.6097	14.7373
hsairetrop10644	3.38252	10.6908	7.44481	10.9076	10.9852	8.91751
hsa_retrom14133	0	0	0	0	0	5.06037
hsa_retrom14678	8.86821	12.6821	15.4857	15.5117	37.016	12.284
hsa_retrop43672	0	0	0	0	0	13.257
hsa_retrop08973	0.593664	1.08034	0.389165	0.670269	0	0.276896
hsairetrom33544	0	2.77012	0	22.281	19.1423	0.131866
hsa_retrom35490	0	0	0	0	0	1.85758
hsairetrop29287	0	0.131421	0.135149	0.317208	0.149107	1.80156
hsairetrop27282	3.60382	2.99992	3.39999	4.7467	5.28265	2.90404
hsa_retrom30145	2.68431	2.30949	0.392479	1.6772	0	0.757764
hsa_retrom35513	0	0.0906103	0	0	0	13.3863
hsa_retrom40094	0	0	2.11478	0	0	0
hsa_retrom24456	1.9592	0	0	0.875703	0	0
hsa_retrom11253	15.6624	19.7607	46.9112	31.178	81.609	18.653
hsa_retrom15543	0	0	0	0	0	1.83636
hsairetrop24499	25.4603	20.2435	0.842609	0.824854	0	3.40006
hsairetrom23993	0	0	0	0	0	2.4559
hsa_retrom41451	1.01864	0.611643	0.275767	0.670087	0	0.222602
hsa_retrom28434	0.337721	2.08004	0.965245	0	0	0.25652
hsa_retrop32578	0	1.09691	0	0	0	0
hsa_retrom18761	0	0	1.17804	0	0	0.0912057
hsa_retrom35901	0	0	0	0	0	7.76029
hsa_retrom29080	0.792869	0.783366	0.29727	0.772496	1.2828	25.938
hsa_retrop17947	1.14605	2.10649	1.21598	1.9126	1.53344	1.25318
hsairetrom21886	2.60262	5.62692	1.68588	0.7306	0	0.231737
hsa_retrom39587	0	0.17642	1.06528	0.152908	0	0.868353
hsa_retrom42081	4.51295	9.90948	5.68641	0	0	0.450391
hsairetrom19523	4.5164	4.8194	2.55519	2.99617	3.59316	4.06612
hsa_retrom16660	2.1092	4.14797	3.38273	2.67988	1.7029	0.625253
hsairetrop40030	1.36721	2.69655	1.26337	0.847088	2.1648	0.126792
hsa_retrop38741	8.87903	8.3057	7.78373	18.1926	5.64141	7.39724
hsa_retrom31537	0	0.316759	0	1.64619	0	0
hsa_retrom07773	0	0.56267	1.63165	3.80179	1.98358	0.575459
hsa_retrom06422	0	0	0	0	0	12.772
hsa_retrop34771	0	1.22524	0	0	0	0
hsa_retrom26243	0	0	0	0	0	2.04472
hsa_retrom04012	1.73723	1.9971	0.586644	0.489435	1.56701	1.05866
hsa_retrop16192	0	1.15681	0	2.01062	0	0
hsa_retrop40951	2.80868	0.776446	4.65517	48.8909	133.896	3.01112
hsa_retrop05104	0	0	0	1.60002	36.5097	1.45927
hsa_retrop29554	1.65858	0.938901	0.282978	1.58312	1.08945	0.896432
hsa_retrop31666	0	0	0	0	0	52.2653
hsa_retrop10816	0	2.73847	0.880724	0	0	0
hsairetrom21718	0	0	0	0	0	6.64781
hsa_retrom25572	0.705471	0.161432	0.304941	0.338711	1.81245	17.5662
hsa_retrom20014	5.78779	6.83252	7.10525	6.95897	8.27772	14.3251
hsa_retrom35675	0.24084	0.731042	0.926948	1.29607	1.62156	0.617174
hsa_retrom08039	0	0	0	0	0	3.41778
hsa_retrop05527	0	2.32067	1.96404	1.02284	3.41113	0.694968
hsa_retrom09624	0.719735	0.571191	1.04979	2.11501	1.34393	0.857187
hsa_retrom30760	0.619644	1.00195	1.17503	2.9252	2.00331	0.666132
hsa_retrop16929	0	0	0	0	0	21.9978
hsairetrop39424	0	0.295115	0.515876	0.306755	0.68719	2.68511
hsa_retrom36198	247.984	127.42	89.3818	34.3209	49.1392	15.566
hsa_retrop11144	0	0.0792448	0	0	0	38.7141
hsa_retrom04803	0	0	0	0	0	1.90899
hsairetrom18830	0.761094	1.18831	1.23064	0.716532	0.467008	0.577632
hsa_retrom31396	30.7924	26.8384	25.575	20.3103	29.5184	55.1569
hsa_retrop10688	1.55117	1.42726	0.796586	0.669188	0.379416	34.0846
hsa_retrop42618	0	0	0	0	0	2.85799
hsa_retrop40929	2.55135	4.18208	2.89695	2.22939	1.04298	0.832154
hsa_retrop21162	0.362027	0.426892	0.315879	0	0	1.77715
hsa_retrop09498	2.17443	0.426542	0.334542	0.434039	1.19758	0.48031
hsa_retrom36148	3.99369	4.7442	4.65789	4.2336	1.74572	4.074
hsa_retrop31280	0	0.103566	0.449882	0	0	15.988
hsairetrom37529	1.61643	2.11305	0.680255	0.319193	0.347661	3.37029
hsa_retrop16438	0.283781	1.16148	0	0.151278	0	0.878434
hsa_retrom04888	0	0.229831	0.1443	0.183401	0	8.3705
hsa_retrop04800	0	0	0	121.826	0.750228	0.400162
hsa_retrom40807	0	0.439938	0	0	4.15859	0
hsa_retrop04054	0	7.17772	0	0	0	0
hsairetrom16610	0	0	0	0	0	36.4164
hsa_retrop20291	1.65815	0.822309	1.35153	1.05359	0	1.35471
hsa_retrop14314	0.681749	1.16167	0	0.685706	0	0.48549
hsa_retrop37417	0	0.110638	0	0	0	5.02966
hsa_retrom10386	0	0.0782534	0	0	0	1.88352
hsa_retrop12685	7.47634	10.1047	10.7247	24.0111	20.8811	9.76153
hsa_retrom01315	0	0	0.935954	0	1.41513	0
hsa_retrom25064	1.82478	0	1.8084	3.11313	0	0.929807
hsa_retrom13826	0.680671	1.51377	0.247024	0	0	0.597895
hsa_retrom13828	0	0	0	0	0	1.67344
hsa_retrop25238	0	0.42858	0	10.7678	48.3023	0.250211
hsa_retrom35644	0	0	0	0	0	28.9717
hsa_retrom05363	14.9854	8.88463	25.4063	18.4308	19.2997	10.9683
hsa_retrom32037	22.3628	39.6636	31.655	33.3089	26.894	18.2181
hsa_retrom34525	0	0	0	0	0	109.753
hsa_retrom08956	0	0	0	0	0	14.276
hsa_retrom29895	0	0	0	0	0	3.6067
hsa_retrom41243	6.92908	3.12186	0	0	0	5.72119
hsa_retrom11235	0	0	0	0	0	61.5147
hsa_retrom39057	0	0	0	10.4827	0	2.80862
hsa_retrop38607	0	0.0971883	1.45877	0.631526	0.735016	1.73057
hsairetrop04798	0.926185	1.46498	1.58561	1.10481	0.51868	0.644449
hsa_retrop37762	0.392114	0.519478	1.79099	1.78851	0	1.54809
hsa_retrop11217	0	0	0	0	0	11.9274
hsa_retrop25540	19.6225	17.2011	3.95087	23.2134	10.2686	11.7779
hsairetrop34028	0	0	0	0	0	2.23254
hsairetrop31617	0	0	0	0	0	84.6805
hsa_retrop10948	0	0.784451	0.376895	0	1.00074	0
hsa_retrom24471	3.46923	2.22126	5.21174	3.64493	1.98272	4.1364
hsa_retrop34562	0	0	0	0	0	17.2456
hsairetrom03253	0	0.28302	0	0	0	1.37208
hsa_retrop25085	0	0	1.68848	0.387765	0	0
hsa_retrop09455	0	0.930842	0.324974	0	0	1.01597
hsa_retrom42530	1.71844	2.0386	1.79318	0	0	0
hsa_retrom30504	0	0	0	0	0	4.07935
hsa_retrop11679	32.7202	11.0703	7.5756	5.38857	3.93894	2.31229
hsairetrop28636	1.29841	0	0.377376	0.285306	0	1.24711
hsairetrom01971	0	1.14411	0	0	0	0
hsa_retrop03847	0	0	0	0	0	3.82207
hsa_retrom04289	12.3631	18.4962	37.6567	41.965	74.2327	58.1193
hsairetrom39463	88.4135	66.4502	52.7835	41.9547	76.6067	25.5174
hsa_retrom16105	0	0	0	0	0	1.31252
hsa_retrom28645	0	0	0	0	0	32.4349
hsa_retrop17190	0	0	0	0	0	319.748
hsa_retrom16228	0	1.2443	0	2.7185	0	0
hsa_retrom03052	0	0	0	0	0	1.52716
hsa_retrop33264	0	0	0	0	0	27.8772
hsa_retrom31238	0	1.0137	0	0	0	0
hsairetrom28519	0.0888376	0.20298	0	0.0585711	0	1.37079
hsa_retrom08497	0	0	0	0	0	19.3897
hsa_retrop36942	0	0.110481	0	1.81017	0	0.324538
hsa_retrop05358	0	19.4552	16.2011	0	0	2.68037
hsa_retrop11094	0.309078	0.629458	0	1.05928	0	0.0592742
hsa_retrop13823	0	1.84051	1.29658	2.27125	1.58244	0
hsa_retrop12751	0	0	0	0	0	1.37573
hsa_retrom32068	0	0	0	0	0	4.19934
hsa_retrop42534	8.59443	5.87264	9.39705	12.1425	11.413	3.22634
hsa_retrop08306	0	0	0	0	26.6	0
hsairetrop03487	13.3558	3.58465	3.37631	1.8669	12.9738	3.7205
hsa_retrop32274	0	0	0	0	0	3.46744
hsa_retrom35690	0	0	0	0	0	10.2449
hsa_retrom27562	0	1.06772	0.738972	0	0	0.162141
hsairetrom27068	0	0	0.316106	0.644447	4.80233	0
hsa_retrop42889	0	1.20588	0	0	0	0
hsa_retrom11245	1.08161	2.91741	1.40194	2.50145	1.59996	0.373004
hsa_retrop34555	0	0	0	0	0	1.86576
hsa_retrom32294	0	0	0	0	0	10.1529
hsa_retrom04584	8.4106	7.34676	9.34753	5.38711	5.96384	4.1216
hsairetrom27743	1.86059	1.34743	3.25029	1.91135	4.11556	5.70969
hsa_retrop40672	57.6569	47.3529	38.3196	39.5426	38.3995	28.259
hsa_retrop31308	0	0.278044	2.87523	0	2.6616	0
hsa_retrom24685	0.274774	0.541794	0.230641	0	0	1.17502
hsa_retrom41384	2.43839	1.79136	1.44702	1.89146	1.18029	0.165454
hsa_retrop28915	2.30715	2.06881	0	1.30822	0	12.9401
hsa_retrom36036	0	0	0	0	0	1.5812
hsa_retrop34887	0	0	0	0	0	1.75118
hsa_retrom17123	0	0	0	0	0	1.08525
hsa_retrom38240	0	0	0	0	0	12.8239
hsa_retrom37791	1.29672	1.1428	0.62022	0.885994	0	3.05115
hsa_retrop27887	2.22956	2.20645	1.0162	0.683586	0.659113	0.467295
hsa_retrom11329	0	0	0	0	0	1.79967
hsa_retrop13243	0	0	4.25475	3.46813	3.63415	0.851954
hsa_retrop38257	0	0.138552	0	0	0	2.0297
hsa_retrom16583	0.401762	1.22145	0	1.15028	2.56708	0
hsa_retrop04145	0	0	0.422601	0.995641	0.195645	1.50344
hsa_retrom21350	0	0	0	0	0	5.87765
hsa_retrop03388	0.0856055	0.0919425	1.67504	1.00215	0.602585	0.894778
hsairetrom27435	0	2.71148	0	0	0	0
hsa_retrop25644	1.03054	0	0	0	0	0
hsa_retrop16218	0	0.398443	0	0	2.76136	0.242163
hsa_retrom28984	0.561294	0.743853	0	0.422881	2.55766	0.312041
hsa_retrop09820	0.706595	0.148009	1.18097	1.68697	1.67616	2.11642
hsa_retrop39665	4.17856	6.41006	11.4632	1.63827	1.35599	2.82583
hsa_retrop39661	0	0	4.0021	0	0	0
hsa_retrom15613	0	0	0.467229	1.77216	1.86545	1.23098
hsa_retrom39281	9.56956	14.4124	8.47828	7.05735	5.46167	2.80131
hsa_retrop24414	0	0	0	0	0	1.15988
hsa_retrom24357	1.63861	1.40165	4.23562	3.14872	6.42546	1.36692
hsa_retrom42416	0	0	0	0	0	3.17471
hsa_retrop36749	0	0.0740741	0	0	0	14.7994
hsa_retrop12913	95.5043	11.4245	4.87324	21.2918	0.818173	119.373
hsa_retrop37919	0	0	0	0	0	3.17747
hsa_retrom10321	1.72057	3.66168	2.17801	6.37469	2.21797	2.45806
hsa_retrop42902	0	0	0	0	0	2.625
hsa_retrom36634	0	0.655887	0	0	0	21.9433
hsa_retrop24944	0	0	0	0	0	2.5468
hsa_retrop27767	414.168	188.504	39.3536	34.3431	24.1268	10.4686

## Sheet: Chimpanzee
# Supplemental Table S3: Retrocopy expression in chimpanzee
# Expression data are in FPKM; each value corresponds at the median FPKM across all samples from that organ
retro_ID	Brain	Cerebellum	Heart	Kidney	Liver	Testis
ptriretrom34716	183.85	75.8152	378.53	346.228	618.953	57.1858
ptriretrop22963	0	0	0	0	0	65.2548
ptr_retrop07697	0	0	0	0	0	113.938
ptriretrom08064	20.0737	8.22792	9.05482	16.1272	13.4767	63.5376
ptr_retrop07349	1.3727	1.74034	2.45113	0.676011	1.11513	0.433577
ptr_retrop07346	0	0	0	0	0	14.2558
ptriretrop08764	1.51711	0	1.45349	0.968705	0	0.583744
ptriretrom36229	3.05296	0.399167	0	0	0	0.917577
ptriretrop21459	10.3173	16.636	35.855	23.701	77.2673	11.4887
ptriretrom21434	84.385	313	661.095	272.385	1358.24	329.217
ptriretrom05432	16.1322	9.09638	10.0555	27.8949	21.6821	1.88239
ptr_retrop06730	0	0	0	0	0	6.53642
ptr_retrop08387	204.238	186.991	869.212	836.716	1404.35	68.9352
ptr_retrom05994	524.763	363.808	2066.31	807.34	0	0
ptr_retrom08654	0	0	0	0	1.32693	1.41351
ptr_retrom08652	1.33093	2.63855	0.905097	4.37325	6.85677	1.36617
ptr_retrom05607	0	0.243012	0	0.208034	0	69.6826
ptriretrom40948	10.4829	16.6479	115.036	25.8586	53.0278	242.617
ptriretrom26075	113.63	81.893	73.5538	54.0787	105.284	17.7259
ptr_retrom07148	0.779723	0.52309	0	0.775334	0	1.25183
ptr_retrop02233	2.86012	2.11998	0	0	0	0
ptriretrom32982	0	0.505792	1.50112	0.469732	0.711609	41.3524
ptriretrop04313	7.42471	7.02987	25.0376	7.88571	14.611	66.4015
ptriretrop19829	5.99722	12.2566	13.4898	11.8129	24.2806	8.24027
ptr_retrom02027	1.50233	3.01541	0	1.44908	0.862683	2.1404
ptriretrom28230	0	1.00834	0	0	0	117.652
ptriretrop40657	44.6999	63.7751	63.8042	68.3587	108.029	59.2941
ptr_retrop09659	0	1.42715	0.764992	0	0	0
ptr_retrop05682	0	0	0	2.42018	0	0
ptr_retrop02488	3.66677	2.19172	1.8829	2.89669	2.00225	1.58634
ptr_retrop02489	0.764501	1.38508	0.731254	0.500442	0	5.25373
ptr_retrom03545	0	1.59333	0	1.05205	1.17458	0
ptr_retrom04134	0	1.91898	0	0	2.10689	0.545446
ptriretrop05096	405.219	323.462	791.631	803.857	1547.69	394.167
ptriretrop32673	0	0	0	0.097859	0	1.30435
ptr_retrop07237	0	0.977532	2.14983	1.64391	1.63247	0
ptr_retrop06911	0	0	0	0	0	19.1928
ptr_retrom02757	0	0	0	0	0	359.701
ptriretrom06037	0	0	0	0	0	23.9845
ptriretrop42170	68.5949	63.7176	90.2226	79.8875	91.2698	38.6501
ptriretrop40764	0	0	0	2230.78	0	0
ptriretrop16360	0	0	0	0.430957	0	25.5604
ptr_retrop02965	0	0	0	0	0	16.9516
ptriretrom12424	0	0	0	0	0	62.4438
ptr_retrop04066	15.2984	25.9916	34.3872	37.858	77.3414	498.538
ptr_retrop02579	0	0	0	0	0	571.104
ptriretrom32861	143.146	137.907	177.567	200.943	271.89	59.1443
ptr_retrom05576	0	0	0	0	0	15.2123
ptriretrom34011	14.9151	12.8675	96.7933	81.2307	1685.36	4.95834
ptriretrom05971	136.644	168.632	354.163	188.601	324.713	284.346
ptr_retrom09675	0.818519	0.88159	0.890162	1.51931	2.12013	2.64465
ptr_retrom06956	6.79122	0	0	0	0	0
ptr_retrop06671	0	0	0	1.48685	0	0.209296
ptriretrom29786	11.3311	5.8684	7.15702	24.4891	19.5409	3.70259
ptr_retrop03811	0	0	0	3.75822	0	0.165446
ptr_retrom10103	0	0	0	0	0	7.79242
ptriretrom38367	615.874	161.627	1454.26	1365.22	1427.28	0
ptriretrop40871	0	0	0	0	0	13.475
ptr_retrom02554	48.2708	57.1758	70.9355	45.8338	70.3995	27.49
ptriretrop29383	350.253	286.096	368.937	430.729	590.732	335.435
ptr_retrop10188	0	0	0	0	0	2.97468
ptriretrom39341	0	4.67486	0	0	0	0
ptriretrom38759	6.51611	8.63634	9.48867	9.60759	8.11206	4.66879
ptr_retrop02840	0	0	0	0	0	152.975
ptriretrom20972	11.2852	10.749	6.48193	17.0685	39.3932	7.69815
ptriretrop33073	86.3293	31.4506	58.3112	100.384	93.4958	26.9666
ptr_retrop07460	13.377	13.3348	11.2865	23.0543	16.7561	10.3374
ptriretrop34544	0	0.706176	0.370366	0	0	4.55052
ptriretrop15004	2.97303	3.05308	3.70719	3.23435	0	0.954171
ptr_retrop05753	318.201	152.151	441.561	436.12	816.161	50.2106
ptriretrom18048	1.06148	1.48457	0	0.703845	0	0
ptr_retrop07664	0	0	0	0	0	15.1258
ptriretrom12390	30.0944	81.9717	100.399	61.3023	74.7005	68.6052
ptriretrop19811	1.32738	0.804628	2.68691	2.84601	8.34328	1.75858
ptr_retrop03911	137.057	136.013	172.706	166.214	295.83	103.195
ptr_retrom05390	0	0	0	0.797805	0	2.10867
ptr_retrop03002	32.1384	28.6099	31.0102	33.8345	25.0776	11.4462
ptriretrom28248	45.8123	18.9406	14.1375	71.8953	84.7251	6.09897
ptriretrop21747	72.2638	43.3438	39.6318	35.1857	42.043	31.1613
ptriretrom32778	39.6126	43.2196	36.743	36.3867	40.5705	30.8818
ptr_retrop03246	0	0	0	0.162696	0	33.1636
ptr_retrop10924	0	0	0	2.38261	0	1.87606
ptriretrom36440	0	0	0	0	0	159.766
ptr_retrom07509	13.3449	11.4087	7.53326	7.41254	9.07698	5.65832
ptr_retrom09248	19.3923	28.9309	27.8896	34.155	21.0952	3.06443
ptr_retrop05946	16.2001	4.79517	12.1233	15.1423	88.6389	2.31761
ptr_retrop05944	3.92435	5.02847	2.84707	2.82936	0	0.823072
ptriretrop37874	1.06695	0.276902	1.45332	3.40087	2.66981	5.40356
ptr_retrop06552	0	0	10.4503	45.4315	143.513	0.700945
ptr_retrop08785	0.8405	0.491408	1.16111	1.56641	3.62592	1.19628
ptriretrom23648	6.09459	5.69861	7.83715	7.88321	5.78614	9.21139
ptriretrop29549	10.4787	12.1062	5.12924	7.61506	12.1661	79.6864
ptriretrop20395	2.02418	1.35088	0	0	0	0.402442
ptr_retrop06968	57.8394	63.2457	71.203	41.3373	43.6842	10.1598
ptriretrom09483	1.765	3.26511	1.13265	2.45402	0.465305	0.611242
ptriretrom24134	53.8447	61.4607	25.2312	102.426	53.4857	85.751
ptr_retrom04336	15.5956	2.95297	7.17271	13.0564	10.9748	2.57268
ptriretrom12450	2.55446	5.0377	2.49443	2.80522	2.41777	0.289907
ptriretrom12454	163.84	174.695	234.798	222.611	454.109	192.201
ptriretrop15155	12.6863	24.9717	22.3311	27.92	13.8543	7.90982
ptr_retrom07017	3.54294	1.99825	0.937556	3.38743	2.40107	1.10266
ptr_retrop04055	1.3171	0.934871	0	2.44216	0	0.164289
ptr_retrop04052	2.50963	1.24632	0.787115	1.02238	1.22275	17.4904
ptriretrop28022	155.591	258.016	375.424	329.876	405.124	175.801
ptriretrop05594	4.13974	2.78918	3.23698	5.91786	9.07	6.91033
ptriretrom04703	0	143.655	288.628	443.137	370.741	0
ptr_retrop05651	0	0	0	0	0	29.7422
ptr_retrom11129	0.86114	0.648227	5.96262	7.23304	13.5856	0.462605
ptriretrop15057	0	0.480791	0	0	0	2.68838
ptriretrop10106	543.415	488.718	956.046	1645.27	989.212	224.684
ptriretrom19538	1112.74	603.22	1195.9	1340.85	1461.23	553.089
ptriretrop41340	0	1.93842	1.39303	0.896801	2.77205	6.7851
ptr_retrop07284	0	0	0	0	0	15.5034
ptriretrop13925	3.39044	4.66868	20.8425	6.08645	13.7646	51.0272
ptr_retrop02778	0.566921	0.278627	1.88749	3.59925	1.80501	0.632152
ptr_retrom05582	0	0	0	0	0	4.37885
ptr_retrop06846	12.0347	7.51526	0	2.76238	0	21.8358
ptr_retrop10375	1.43207	1.17884	0	0.148755	0	165.852
ptriretrop34309	6.44704	7.77687	3.88306	6.38983	6.52846	30.4345
ptriretrop27700	0	0	0	0	0	17.9176
ptr_retrom06318	0	0	0	1.17711	0	3.1288
ptr_retrop05465	19.7872	24.3425	55.6593	14.5414	16.115	8.20788
ptr_retrop07435	8.32167	15.9983	14.8598	7.47131	4.9632	19.8707
ptriretrom38807	1.8195	3.0717	3.00595	0	0	7.6759
ptr_retrom02500	0	0	1.74868	0	0	0.176629
ptriretrom32404	29.451	32.349	61.5212	101.268	140.169	15.5795
ptriretrop35769	0	0	0	0	0	9.53556
ptr_retrop06711	19.4064	8.68662	12.292	18.8047	8.18986	4.35509
ptriretrom12716	2.00734	5.66981	23.7976	4.82425	20.5302	45.1822
ptr_retrom08808	9.88539	0	0	990.059	0	0
ptr_retrop03743	12.6527	5.17107	5.65424	23.0011	1.92798	218.794
ptr_retrop05197	0	0	0	0	0	7.35987
ptriretrom27641	147.449	116.673	148.791	119.407	67.432	65.7196
ptriretrom37219	1.92458	1.1168	5.40611	6.04254	6.31907	1.25232
ptriretrom18906	8.64814	8.24443	7.70187	5.43385	7.77485	7.75417
ptriretrom12995	33.514	20.4603	18.6312	16.4719	21.4466	7.42074
ptr_retrop05979	0.5867	0	0	1.23027	0	1.26227
ptr_retrom04283	3.54025	3.821	0.618168	1.32331	0.774379	1.68702
ptr_retrom04288	0	0	0	0.361111	0	15.5275
ptriretrom09024	0	0.189902	0	0	0	5.14502
ptr_retrom02589	10.7332	15.1609	10.3074	9.92759	11.7069	21.5945
ptr_retrop05549	26.2571	33.2118	18.5348	14.8412	11.5437	75.0543
ptr_retrop04089	0	0	0	0	0	22.3079
ptr_retrop05069	3.67709	0	11.2706	3.5402	0	0
ptr_retrop06799	6.24145	0	0	0	0	0
ptr_retrop03157	1.66177	0.554448	0	0	0	2.99989
ptr_retrom11112	11.743	30.8935	14.1803	5.91981	2.85396	5.16494
ptr_retrom07497	1.03577	1.02257	0	0	0	1.61246
ptr_retrop07255	2.23966	3.37506	3.27362	5.70458	4.38187	2.03871
ptr_retrom04820	2.086	2.59794	1.53229	1.67742	0	0
ptr_retrop09480	86.1783	35.8182	0	0.493302	0	7.40129
ptr_retrop06937	0	0	0	0	0	23.4346
ptriretrop18583	76.5294	58.1164	94.6978	51.5536	80.9784	30.1385
ptr_retrom08481	0	0	0	0	0	5.30478
ptr_retrom02738	0	0	0	0	0	79.723
ptriretrom14801	3.36519	2.69182	3.32646	4.24631	7.54681	1.56943
ptr_retrom07047	0.87412	0.724722	1.07525	1.02339	1.07783	0.553145
ptr_retrop01988	0	0	0	4.5215	11.6757	0
ptriretrop20790	80.9609	61.3479	26.5652	35.7799	29.9025	10.2221
ptriretrop25311	1.4229	2.97893	1.73893	1.24633	2.50609	0
ptriretrop17289	275.738	84.5243	615.707	742.222	706.681	73.1485
ptr_retrom05558	0.627097	0.969121	1.43354	0	0	0
ptriretrop18957	46.0083	54.5545	92.1074	117.907	86.5373	21.6752
ptriretrop04234	52.8411	62.9717	59.0563	75.2261	54.6591	13.4623
ptr_retrop06728	0	0	0	0	0	21.2248
ptr_retrom07363	0	0	0	0	0	98.818
ptriretrop17894	0	0	0	0	0	7.12093
ptr_retrom06105	9.75576	9.12353	12.5361	6.05601	6.84785	2.38483
ptriretrom33941	12.5637	22.3319	26.482	21.313	15.1703	39.4435
ptriretrom22329	18.7727	26.1471	88.9086	32.8456	93.3816	257.33
ptriretrop19218	11.3641	11.903	10.157	18.9307	18.1256	11.6654
ptriretrom35075	0	0	0	2.01383	0	0.987868
ptriretrop02716	20.8679	13.4437	29.7734	34.3258	37.0084	9.46928
ptr_retrom08895	0	0	0	1.27424	0	0
ptr_retrop06480	8.15739	3.99281	7.04363	8.74498	15.6964	4.42132
ptr_retrop01905	3874.91	1082.45	1087.12	5302.32	2013.23	229.128
ptriretrop19060	450.392	258.973	1264.91	1130.28	763.811	214.949
ptriretrop11310	9.72413	0	11.7	15.0367	32.4386	12.7271
ptr_retrom09303	2.41068	1.24035	57.4467	4.98324	3.86581	0.241158
ptr_retrom02988	25.6523	14.1483	67.1309	21.4864	0	46.3714
ptriretrom34490	0.533571	0.646303	0.659181	2.68625	4.93096	8.73485
ptriretrop07959	0	0	0	0	0	4.27526
ptriretrom14062	0	0	0	0	0	22.0362
ptr_retrom05618	0	0	0	0	0	10.6847
ptr_retrop07449	0	0	0	0	0	4.43972
ptriretrop34565	0	0	0	0	0	173.36
ptr_retrom07026	7.2547	9.93805	2.40013	3.26995	2.56251	1.17658
ptriretrop04301	0	0	0	0	0	19.1814
ptriretrom42025	3.4715	7.1037	1.85817	0.930023	0	0
ptriretrom42028	430.352	175.631	301.117	731.071	313.915	51.7256
ptr_retrop03937	0	0	0	0	0	82.2363
ptriretrom28227	0	0	0	0	0	61.6258
ptriretrop20985	4.73297	2.79629	52.3702	61.0914	97.8143	4.30701
ptr_retrom08991	0	0	0	0	0	24.0686
ptriretrop24269	48.268	39.4081	39.7714	100.8	95.2726	33.5852
ptr_retrom09599	13.6337	10.3942	17.2834	21.1313	13.9464	20.9242
ptr_retrom09967	152.256	38.5628	21.1206	216.58	67.1672	31.1807
ptr_retrom03311	0	3.88835	0	0	0	3.04529
ptr_retrom03015	1.29896	2.69082	0	1.65548	0	1.63835
ptriretrom07376	2.18065	2.42975	2.22192	2.00797	0	1.57539
ptriretrom10999	4.85319	0.73929	0	2.23819	0	47.1008
ptr_retrop10258	1.22138	3.10713	0	1.37906	0	0.43603
ptriretrop31638	24.5994	19.6804	72.7829	34.5137	40.273	22.6022
ptr_retrop10871	0	0	1.81552	3.60198	7.29841	0.815234
ptr_retrom10205	0.973569	1.48364	0.933523	0.995344	1.22602	0.132742
ptr_retrom10209	0	0	0	0	0	1.32461
ptriretrom04769	2413.23	374.35	548.695	2099.61	851.306	521.759
ptriretrom40523	8477.12	8262.08	9907.2	11452.5	36833.4	51392.8
ptriretrom06183	1.38979	1.66073	0	0	0	2.01053
ptr_retrop08376	164.728	105.798	161.871	81.3734	311.191	20.0771
ptr_retrop03107	0	0	0	0	0	4.13299
ptr_retrop03109	1.69303	0	0	1.22318	0	0
ptr_retrop09910	2.74832	0	0	0	0	22.4381
ptriretrop07334	0	0	0	0	0	6.57528
ptriretrom42492	1.71629	0.485406	1.9122	1.08022	0	44.9432
ptriretrom09821	36.9784	0	55.4787	32.0199	0	13.7679
ptr_retrom05134	0	0	0	22.7857	41.3889	12.7765
ptriretrop29948	0	0	0	0	0	9.22731
ptr_retrop03808	0.627093	0	0	0.633533	0	1.61185
ptriretrom32365	0	0	0	1.37119	0	0.275975
ptriretrom38399	286.625	208.411	488.931	461.947	474.993	212.646
ptriretrom11796	0	1.54534	0	0.612319	0	1.51541
ptr_retrop01937	524.148	213.899	59.8104	38.6025	56.7654	6.50503
ptr_retrop03681	7.49766	7.22577	8.8192	17.5078	16.1169	6.03904
ptr_retrom03218	0	0	0	0	0	37.7242
ptriretrop21143	0	9.67168	0	22.283	15.6126	3.66486
ptriretrom21470	1.29416	0	0	0.231096	0	9.10932
ptr_retrom01972	3.0936	1.10091	0	1.53583	0	6.40835
ptr_retrom09683	3.33739	1.02242	6.34819	9.09711	6.99309	1.20921
ptr_retrom02159	225.915	249.427	110.066	351.786	464.965	96.966
ptriretrom28343	75.1854	36.651	127.437	103.119	182.283	32.6726
ptriretrop22408	48.1202	17.9206	32.2648	39.668	11.2305	3.29626
ptriretrom18969	22.8902	17.3342	27.8223	18.2057	45.0796	24.7456
ptriretrom04598	35.9606	70.8543	0	0.645374	0.384372	3.7263
ptr_retrom10996	12.5085	19.4649	8.14246	7.07108	10.9194	3.77697
ptr_retrop05720	1.70584	2.43996	1.25265	1.21583	2.01418	111.259
ptriretrom41581	2.78196	5.74199	4.87282	3.75952	4.81925	52.7369
ptriretrom22093	8.082	8.95189	9.85696	8.50561	7.12881	5.49413
ptr_retrom05573	0	0	0	0.27978	0	3.59994
ptr_retrom04388	0	0	0	0	0	8.11245
ptr_retrom05813	11.9987	17.144	17.097	25.9326	41.2528	85.7434
ptr_retrom05810	0.98408	0	0	0	0	14.4744
ptriretrom41635	21.5925	25.6122	35.7381	59.5493	59.7655	30.4872
ptriretrom07856	1.61905	4.59594	2.49219	2.74669	2.5085	2.62622
ptr_retrop09612	0	0.28903	0	0.625284	0	15.1335
ptr_retrom03507	1.277	0.54615	0	0.266301	0	0.321348
ptr_retrom08619	0.486088	0	0.628181	1.01676	0	0.482241
ptr_retrom08615	172.755	141.013	73.4603	262.475	269.001	42.4225
ptr_retrop05950	0	0.755031	0	0	1.59442	0.577697
ptr_retrop05957	1.11616	2.22448	0	0	0	0
ptriretrop42714	3.78938	4.0214	9.69441	21.4798	25.5145	25.5694
ptr_retrom03320	0	0	0.609069	2.51594	2.17353	2.61921
ptr_retrop09799	0.38388	0.868214	0.724866	0.402033	0	8.34339
ptr_retrop05238	188.622	139.943	103.659	83.1179	52.6014	76.5552
ptriretrom36396	1146.37	992.075	1368.31	2113.64	1464.35	771.409
ptriretrom05050	0	0	0	0	0	19.5387
ptr_retrop11572	1.72975	3.29321	0.778289	0.987427	0.557978	0.896875
ptr_retrom06812	5.57472	3.30254	15.6056	22.415	27.3618	45.0599
ptr_retrop10227	40.4187	21.9453	63.1474	107.734	107.149	30.5223
ptriretrom26202	82.7982	100.759	87.1928	46.5071	50.729	32.4022
ptriretrop37743	0	0	0	3.04706	0	0
ptriretrom34871	0	0	0	0	0	127.895
ptriretrom34050	4.93167	9.59491	5.33696	4.1978	4.69426	3.19049
ptr_retrop02373	12.5465	26.6953	6.88034	10.8569	15.7706	4.90459
ptriretrop14132	226.381	183.101	379.99	710.01	827.179	158.888
ptr_retrop10523	0	0.883107	0	1.12798	0	0
ptriretrop14680	3.4002	4.80386	7.82919	9.24976	9.61987	12.5961
ptr_retrop03172	0	0.616517	0.346165	0.719735	0	1.84914
ptr_retrop03176	0	0	0	0	0	4.19517
ptr_retrom06998	0	0	0	2.07028	0	0
ptriretrop26323	107.862	160.293	228.578	230.551	257.171	71.9934
ptriretrop19989	106.714	102.118	164.693	229.226	178.995	57.5102
ptriretrom33925	1.65456	2.97859	2.43418	1.33695	2.1957	0.74445
ptriretrom33921	0	1.02513	0.635909	0.694786	0	0.795693
ptriretrop12539	8.46402	6.0776	12.1365	65.6664	768.306	2.1239
ptriretrom41121	3.17433	2.43961	8.90939	5.57802	5.42255	11.9189
ptr_retrom06416	0	0	0	0	0	47.9248
ptriretrop04536	0	0	0	0	0	13.261
ptr_retrom07523	348.498	153.325	117.501	29.0264	56.0583	18.2952
ptr_retrom09870	7.67901	4.66662	14.3722	11.6703	15.8311	4.92865
ptr_retrop05088	0	1.65413	0	2.33475	0	3.76004
ptr_retrop09501	5.42668	1.424	0	0	0	13.3985
ptriretrop15393	3.58528	6.99825	3.38759	3.83962	0	4.95696
ptriretrop29699	0	0	1.6014	2.18959	0	0
ptriretrop16601	13.8951	60.193	44.9332	19.2445	15.9431	4.56033
ptr_retrom10757	2.17202	1.79722	4.91878	1.92282	1.43549	4.6265
ptriretrom20407	6.62652	6.19185	10.7426	19.2871	25.1895	3.17009
ptriretrom40599	22.9394	14.2543	7.20674	20.8754	18.3588	109.092
ptr_retrop02805	0	0	0	0	0	27.0619
ptriretrom07749	19.254	16.1413	26.0206	24.7955	31.9459	7.4405
ptr_retrom06125	46.8721	10.7294	23.5225	90.148	94.3814	6.67189
ptriretrop22438	21.5575	17.845	20.1685	17.1045	25.719	30.8049
ptriretrom16786	0	0	0	0	0	21.2457
ptr_retrop07143	3.61557	0.288544	0	0	0	0.228057
ptriretrop30785	6.6326	10.0836	31.1286	17.7458	21.4468	51.0332
ptr_retrop01598	2.60407	0.733065	0	0	0	1.23051
ptr_retrop03855	180.578	78.357	165.238	98.3737	165.869	12.8016
ptriretrom22677	2.70103	2.25241	0.707849	0.763705	0.913704	13.8555
ptr_retrop08743	35.7926	21.5611	31.2079	21.1526	33.4825	189.9
ptr_retrop01960	0	3036.61	2580.88	3963.72	7583.71	1620.39
ptr_retrop01962	1.612	2.82743	0.415445	1.45501	0	2.19955
ptriretrom25519	0.518317	1.02781	0.830861	1.00288	0	0
ptr_retrom03743	0	0	0	13.2734	3.86758	1.20468
ptriretrop14592	77.7924	40.9167	39.1899	80.3339	46.4459	27.6901
ptr_retrom11002	8.31036	4.75096	4.7028	5.39243	5.32645	2.19997
ptriretrop14867	10.7703	12.8183	15.9558	9.50199	10.4781	16.8939
ptriretrom32891	45.4582	44.0943	74.1987	41.1157	38.5981	40.0093
ptr_retrop07077	0.584474	0	0.609061	0.596619	0.73924	5.88126
ptriretrop39712	0	0	1.86474	0	0	0
ptriretrom10832	22.3032	18.6664	58.477	40.0877	70.4893	28.1836
ptr_retrop09625	0	0	0	0	0	15.2125
ptriretrom37467	0	1.00204	0	0	0	0
ptriretrom18931	0	1.57665	0	0.580817	0	0.602314
ptr_retrom03134	0	0.861943	0	1.9425	0	0
ptr_retrop09866	0	0	0	0	0	23.8599
ptr_retrop06510	9.92355	8.992	7.56917	3.54015	4.33548	0
ptr_retrom07154	6.40521	11.8922	20.5509	0	0	0
ptr_retrop04117	3.62931	4.52897	4.74443	5.90409	6.69085	1.80149
ptriretrom34902	1.1756	0.990113	2.05104	10.2626	21.0499	24.5062
ptr_retrop09476	63.8401	57.2921	222.682	63.0568	54.1639	54.4209
ptr_retrop02227	42.7867	29.1528	49.082	45.0306	35.4796	4.08255
ptriretrop18849	2.22125	2.43162	1.77537	2.19049	0	1.06547
ptriretrom09033	4.26996	6.16961	3.06105	7.68774	6.38245	17.6988
ptriretrop06980	13.2421	14.6521	17.1626	22.6328	10.4332	9.74056
ptriretrop38630	0	0	0	0	0	1.85564
ptr_retrop08662	0	0	0	0	0	4.95058
ptr_retrop05057	0	0	0	0	0	81.2691
ptriretrop04910	43.3368	19.2835	0.701455	1.28774	0	3.31141
ptriretrom33148	6.45462	13.0017	6.56593	6.24344	12.5218	3.16877
ptriretrop18657	7.19959	5.95929	16.292	9.19464	8.4598	7.43973
ptriretrop05662	14.9013	12.4964	4.27488	17.9202	6.99533	21.5513
ptriretrom07431	0	0	0	0	0	28.949
ptr_retrop10515	6.83975	5.56612	2.77136	6.2252	3.32164	0.348347
ptriretrom36163	31.5512	81.2501	123.488	71.4441	87.0885	45.7517
ptr_retrop02809	2.06375	0	0.917835	0	0	0
ptriretrop07358	2.27553	1.99642	1.02511	0.631816	0	4.26627
ptriretrom42438	65.1429	38.6906	88.8975	120.726	86.4233	38.1529
ptr_retrop05901	30.184	30.2043	58.2211	41.7011	47.0042	17.8561
ptriretrom10368	32.4054	68.6311	84.1097	60.5216	119.258	105.827
ptriretrop04075	17.1213	10.3804	24.4638	13.9274	12.1197	153.663
ptriretrom08895	4.62873	5.39581	4.15836	8.28775	8.02214	27.4576
ptr_retrop07244	26.5822	4.46177	4.56901	19.2031	0	0
ptr_retrom03376	0	1.09715	0.309549	0.225089	0	0
ptriretrop34886	0	0	0	0	0	23.1571
ptriretrop13112	2.09215	2.98293	3.30837	2.30933	3.76102	2.40901
ptr_retrom09836	0	0	0	0	0	9.58609
ptriretrom13772	15.0837	9.83594	27.0358	14.1184	29.6724	17.5639
ptr_retrop09949	0	0	0	0	0	29.0977
ptriretrop31383	3.12353	1.77563	3.22479	2.20438	2.38507	1.27427
ptriretrop31653	2.18657	4.10656	0	0.296161	0	0.136226
ptriretrom11532	0	0	0	0	0	32.9251
ptr_retrom08390	0	0	0	0	0	409.563
ptriretrop33817	1683.91	700.001	11991.9	3200.28	1512.08	458.202
ptr_retrop02341	1.7667	0.782765	0	0.369206	0	0.287819
ptr_retrop02344	2.39011	0	0	0	0	0
ptr_retrom06947	2.39977	3.23152	3.64122	2.90441	3.69851	3.87294
ptr_retrom06737	1.76967	0.748194	13.2317	10.558	19.8713	40.1764
ptriretrom11099	77.3743	62.0749	117.48	162.083	269.318	25.231
ptriretrop41652	5.92831	7.8918	8.47992	8.74094	7.1925	3.39963
ptr_retrop07136	2.81641	3.05279	2.34677	0	0	0
ptr_retrop07139	0.565295	0	0.483215	1.26333	4.5171	0.798603
ptr_retrom10110	0	0	0	34.9805	0	0
ptriretrop24479	5.30611	5.26475	4.80732	5.81119	4.9666	6.72007
ptriretrom42090	12.7141	5.60779	8.42884	6.99976	3.45037	0.672762
ptriretrop39158	6.83733	5.28295	35.1824	27.2225	39.9736	8.14604
ptr_retrop07363	0	0	0	1.12546	0	0
ptr_retrop07366	0	0.285433	0	10.6109	8.44558	0
ptriretrom39332	0	3.09516	0	0	0	0
ptr_retrom07251	2.0709	1.72257	0	0	0	0
ptriretrop19071	70.4005	53.2157	76.4128	60.3255	128.129	52.624
ptr_retrom02178	168.319	140.552	102.877	91.262	172.853	33.8143
ptriretrom06832	8.37377	0	0	5.73936	0	2.49176
ptr_retrop03704	4.77081	3.58714	3.84575	6.13086	6.62933	1.67465
ptr_retrom05426	5.07024	3.89844	1.84659	2.3699	1.19742	1.14706
ptriretrop20115	0	0	0	1.79281	0	0
ptr_retrop10677	1.51231	1.99874	0.418085	0.885843	0	4.37448
ptr_retrom01857	7.32221	10.2388	1.98643	3.46258	4.67437	2.09606
ptr_retrom03109	1.16098	1.28872	0	1.25412	0	0
ptriretrop17573	5.51201	4.5698	0	6.06142	4.86642	3.45263
ptr_retrop10076	8.96865	7.24248	14.313	9.555	9.53233	7.45568
ptr_retrop05294	0	0	0	0	0	1.13503
ptr_retrop08718	0	0.376845	0.588643	0	0	8.62967
ptr_retrop05748	4.07134	1.35355	55.676	13.427	17.9142	0
ptriretrop25784	13.0477	10.2997	9.78511	6.88674	13.5484	358.644
ptriretrop26835	32.5293	28.8871	48.1689	33.0132	26.1809	142.971
ptr_retrom09608	1.00828	3.10004	0	0.842968	1.53797	0.401556
ptriretrop36734	27.7038	42.8831	61.0426	26.9881	33.8331	44.9015
ptriretrop27172	4.69579	1.73526	1.46122	2.42568	0	1.8425
ptr_retrop03902	0.70066	1.36634	0	0.99547	0	0.495649
ptriretrom22766	0	0	0	0	0	131.084
ptr_retrom06024	0.374228	1.03524	1.52265	2.39083	2.77566	1.01192
ptr_retrom09036	0	0	0	0	0	26.3204
ptriretrom13807	61.1761	30.9823	53.4419	84.8096	78.4195	20.9603
ptr_retrom03520	20.1539	13.0803	19.8052	16.9345	84.9806	7.8778
ptr_retrom03524	258.386	209.393	326.534	213.613	198.317	18.1123
ptriretrop26926	0	0	0	0.695925	0	2.36179
ptr_retrom07510	0	0	0	34.2497	0	20.8282
ptriretrom31416	0	0	0	0	0	4.6286
ptriretrom36136	2.69155	4.64851	3.98987	1.80333	1.06754	17.2145
ptriretrom10087	24.5462	14.7623	21.2949	90.6576	197.156	4.56598
ptr_retrop08877	0	0	0	0	0	74.7651
ptr_retrop08467	3.2222	3.66688	0.621375	0	0	0.463635
ptr_retrop08463	0	0	0	0	0	19.0911
ptriretrop11562	0	0	0	7.12958	1.82348	4.66608
ptriretrop06465	0	86.0267	62.2453	70.5441	0	44.6918
ptr_retrom09796	15.6036	22.6633	28.8905	19.6682	36.6813	63.3796
ptr_retrom09798	1.79697	2.1244	0	0	5.92047	0.628451
ptr_retrom03793	0.788405	3.90765	0.761096	3.00535	5.09352	3.2166
ptriretrop17018	2.461	0	0	0	0	0.855992
ptriretrom24906	179.551	39.4594	67.241	193.032	145.537	10.8932
ptr_retrom07001	0	0	0	0.657837	0	1.39308
ptriretrom08070	0	0	0	0	1.51272	0.778741
ptr_retrop04040	0	0	0	0	0	3.34669
ptr_retrop08612	0.62834	1.39044	0	0.905416	0	0
ptr_retrom05512	5.11732	2.38595	16.6825	37.6679	32.3973	3.07573
ptr_retrom05511	20.8993	33.3412	44.5877	71.4992	113.24	122.59
ptriretrom32470	0	0.9475	7.1031	5.47806	3.85847	1.0122
ptr_retrop11414	153.554	55.5077	40.137	63.2791	32.1522	2.7836
ptr_retrop10944	0	0	0.848101	3.77267	1.12107	3.21016
ptr_retrop06651	0	0	0	0.777672	0	1.33976
ptr_retrop06654	20.4879	9.92179	47.3605	25.6106	85.4422	16.0848
ptr_retrom06381	0.80951	1.17164	0.74079	1.12897	0	0.662994
ptr_retrom05121	0	0	0	1.74291	0	0.915378
ptr_retrom07411	0	0	0	0.948666	0	13.4435
ptriretrop38064	258.496	268.312	280.287	377.951	405.663	156.455
ptr_retrom09260	0	3.28599	0.400607	2.25138	0.545779	0
ptriretrop41887	0	0	1.37972	0.965211	0	1.35747
ptriretrom18596	55.0445	21.6434	13.2664	22.4372	29.0388	49.3951
ptr_retrom09818	0.896557	1.07853	1.09299	1.55767	2.45186	73.9475
ptriretrop40705	7.48427	0	19.0741	23.3891	54.6278	10.4714
ptriretrop23774	85.8407	66.7936	100.202	147.139	121.979	20.1687
ptriretrop33779	11.1507	6.34931	12.432	9.85348	5.82702	93.192
ptr_retrop02319	0.389099	0	0	2.19548	0	1.16488
ptr_retrom07329	0	0	0	0	0	48.9349
ptriretrop41627	15.595	4.61717	4.52204	2.60415	10.1594	3.53863
ptriretrom41815	0	0	0	0	0	9.81787
ptriretrom25048	82.0828	88.503	171.141	150.722	253.295	78.16
ptr_retrop08769	91.7083	16.2759	25.5376	102.77	39.7324	4.4571
ptr_retrom10989	0	0	0	0	0	1.75489
ptriretrop22204	11.5475	8.37221	13.1076	8.87005	11.2206	12.7453
ptriretrom26882	36.1404	37.9496	39.428	48.5101	25.1972	32.1692
ptr_retrom02538	5.43858	5.107	2.60441	3.61891	0.640456	4.23613
ptr_retrop05532	0	0	3.9569	3.07751	0	0.905609
ptr_retrop05531	1.8419	1.45193	9.97761	7.50167	5.56245	3.52727
ptr_retrop02087	0	2.33135	0	2.44674	0	0
ptr_retrom04396	0	0	0	0	0	1.8747
ptr_retrom04393	18.9783	27.6936	41.9151	17.0723	51.4279	45.8252
ptriretrop22813	31.639	23.7723	14.8216	11.8326	20.1137	7.2221
ptriretrom35428	379.491	173.425	288.491	629.631	578.101	98.9013
ptr_retrom09263	3.16258	2.60345	2.26943	1.87381	0	0.892369
ptr_retrop05965	0	0	0	0	0	36.1639
ptr_retrop08827	4.97702	5.12328	22.1913	1.8683	1.33431	1.34772
ptr_retrop08820	52.8803	126.668	306.992	136.717	255.806	187.043
ptr_retrom04521	19.4941	11.3415	15.0843	22.3008	32.0735	5.06888
ptr_retrop06681	0	0.541239	0	0	0	1.01606
ptriretrop38493	1.72892	1.3002	0	1.26579	0	1.31253
ptriretrop26727	1.31962	8.27071	0	0	0	0
ptr_retrop05221	0	0	0	75.0866	0.960283	4.43549
ptr_retrom09803	0	0	0	0	0	7.43204
ptriretrom40334	115.335	56.1495	122.348	125.753	128.596	22.1375
ptr_retrom03055	12.9166	2.784	10.5786	16.5171	20.1739	0
ptr_retrom06808	1105.06	277.597	970.745	1726.14	1353.99	179.748
ptr_retrom07033	9.44367	5.37209	3.59159	3.26059	2.76562	2.0166
ptriretrom08266	17.0925	41.1537	49.7385	41.9838	60.7065	9.13534
ptriretrom06494	1.84154	2.23183	0	2.49509	0	1.41546
ptriretrom28380	11.9393	22.761	44.996	35.3516	47.9073	34.1808
ptriretrop22172	0	1.13581	0	0	0	0
ptriretrop07998	11.366	15.6233	18.7548	20.9881	2.69985	0.457773
ptriretrom08870	0.929743	1.80149	0	1.15205	0.856803	0.289973
ptr_retrom00919	0	1.83956	0	0	0	0.941992
ptr_retrop09495	0	0	0	0	10.5384	0
ptriretrom21392	0	0	0	5.28344	0	1.69267
ptr_retrom10956	50.7493	42.7525	26.818	20.6169	16.3603	33.4176
ptriretrop34174	6.82062	2.58761	3.60222	7.34658	6.54845	1.15844
ptr_retrop10836	0	1.37121	0	0	0	0
ptriretrom21808	0	3.2715	0	0.880703	0	3.28005
ptriretrop25305	26.9713	22.9099	15.2758	9.99375	8.28696	1.21946
ptr_retrop05345	0	0	0	0	0	1.88624
ptr_retrop09511	4.9713	0.822477	2.20216	2.84354	2.7772	10.1818
ptr_retrop09512	0	5.32868	0	0.224066	0	0.453351
ptr_retrom09648	0	1.63272	0	2.03412	0	0.714505
ptriretrom09369	45.102	26.6959	41.1953	80.8014	75.3227	61.8012
ptr_retrom06968	76.2798	61.1553	43.1959	34.9145	29.2139	38.4093
ptr_retrop02819	0	0	0	20.4906	0	0
ptriretrom21109	1.93993	3.43051	2.07751	3.81311	5.25781	0.816617
ptr_retrom07372	0	0	0	0	0	25.148
ptriretrom38981	4.15013	3.25414	4.48437	7.34876	9.66029	4.68114
ptriretrom31388	2.95196	3.62259	2.83558	2.38545	2.90714	1.10864
ptr_retrop07152	318.279	63.3682	157.058	328.681	247.978	31.9905
ptr_retrom02480	2.37066	0	0	0.528739	0	6.93505
ptriretrop14779	28.5517	32.0289	20.5756	32.2417	105.958	48.2304

## Sheet: Gorilla
# Supplemental Table S3: Retrocopy expression in gorilla
# Expression data are in FPKM; each value corresponds at the median FPKM across all samples from that organ
retro_ID	Brain	Cerebellum	Heart	Kidney	Liver	Testis
ggoiretrop11496	2.32234	2.1338	0	2.24562	1.96016	1.19086
ggo_retrom02916	0	0	0	0	0	4.35048
ggo_retrom02913	0	0	0	0	0	2.54994
ggo_retrom04458	0.194539	0	0	0	0	9.24946
ggo_retrop03626	14.8278	12.7401	17.1348	10.096	19.4716	5.01377
ggo_retrom03437	0.0357712	0	0	0	0	51.6808
ggo_retrom00165	1.02202	1.27402	0.645559	1.1555	1.66484	1.53944
ggo_retrom00162	1.04263	0.665802	0	0	0	1.14367
ggo_retrom02915	0.299045	0	0	0.494962	1.20765	0.968023
ggoiretrom17044	1.41647	1.2834	0.919026	1.96124	1.88965	2.35756
ggo_retrop01478	9.56291	8.5432	15.7816	26.7791	56.5379	8.83602
ggo_retrop03425	181.999	206.978	338.102	331.22	561.596	135.337
ggo_retrop03426	0.714354	0.23704	0	0	0.203396	7.42241
ggoiretrom16963	82.4396	52.2068	70.0572	170.736	119.707	60.7693
ggo_retrom02760	17.7124	26.7857	49.3435	66.3894	100.696	84.4575
ggoiretrop26514	7.87934	8.48933	8.50966	5.95918	5.49609	26.5307
ggo_retrop03794	2.36365	3.8176	5.26223	12.7996	16.6152	12.1364
ggo_retrop03795	0	0	0	0	0	8.24824
ggo_retrom04564	191.882	95.3475	0	120.663	226.42	155.832
ggo_retrom04563	6.76623	5.64124	6.83782	6.70727	11.3692	5.14968
ggo_retrom00599	0.590465	0	0	2.49408	1.26852	0.304912
ggoiretrom30446	11.1498	12.0399	19.7618	9.73825	9.02623	7.99262
ggo_retrom01316	0.186834	0	5.49231	0	0	0.643217
ggo_retrop03851	0.260528	0	0	13.3389	0.328119	0.32287
ggo_retrop02817	0	0	0	0	0	2.22789
ggoiretrop21579	3.44765	2.95113	1.78947	1.16838	3.67005	0.982616
ggoiretrom16711	0	0	0	0	0	5.05297
ggo_retrom04233	0.411188	2.17437	0	0	0	0.0807531
ggoiretrop37312	1.60399	1.698	0	1.3814	0	0.383022
ggo_retrop04230	0	0	0	0	2.32863	0
ggo_retrop00262	1.02624	1.23664	0	0.385633	0	0.278468
ggo_retrom02814	0	0	0	0	0	3.50537
ggoiretrop21774	8.30777	6.43076	15.9638	13.1234	7.25209	18.1683
ggo_retrop04571	3732.98	0	0	0	0	0
ggo_retrop00064	0	0	0	0	0	9.19566
ggoiretrop33772	0	0	0	0	0	4.24935
ggo_retrom03729	13.3955	15.4927	16.6624	11.5374	9.59189	7.36871
ggo_retrop02893	0	0	0	0	0	1.03183
ggo_retrop01277	8.64028	0	4.24741	0	10.7538	4.17389
ggo_retrop01273	97.6928	95.4626	113.997	86.5973	111.155	46.1214
ggo_retrop02465	9.04742	6.54466	14.9619	9.27888	11.0047	4.708
ggo_retrop04703	0	0	0	0	0	3.70706
ggo_retrom03142	2.9013	13.1654	0	0.685033	0	0.437727
ggo_retrom00728	3.99649	5.38947	0	5.13906	3.07559	1.97911
ggo_retrom03917	1.3967	2.57796	5.49281	2.88123	3.16074	1.02299
ggoiretrom04060	1.23722	1.15317	0	0.546938	0	0.355984
ggoiretrom11298	1.47613	0	0	0	0	1.5562
ggo_retrop02632	0	0	0	0	0	1.5584
ggoiretrom30729	2.13794	1.64595	0	0	0	2.61472
ggoiretrom07575	0	0	0	0	0	2.88697
ggo_retrop00308	0	0	0	0	0	3.12596
ggoiretrop27177	0	0	0	0	0	8.12171
ggo_retrom02686	8.96158	8.44785	100.148	75.9624	91.3423	14.0592
ggoiretrop20587	15.6766	26.3569	78.6706	51.5701	49.987	25.0777
ggo_retrop03022	0.422799	0.879874	0	1.13545	0	2.52528
ggo_retrom01644	0	0	0	0	0	8.9834
ggo_retrop04125	4.53739	2.1363	7.13307	3.97824	5.61044	2.98677
ggoiretrop03726	0	0	0	0	0	138.141
ggo_retrop03617	10.5391	8.4913	6.90557	5.35234	6.11693	17.6343
ggo_retrop03612	11.5189	14.2229	33.1562	23.8449	20.8624	10.7302
ggoiretrom17077	0	0	0	0	0	5.51861
ggo_retrop00487	0	0	0	0	0	294.306
ggo_retrop00483	0.333013	0	0.990797	1.06039	1.17577	6.90959
ggo_retrop00817	1.76865	2.62498	0	0.710376	1.26987	0.290771
ggoiretrop22294	27.0837	17.5151	14.7992	51.7078	92.8809	13.1764
ggo_retrom01554	13.9916	9.73937	4.593	5.44037	8.16022	4.36428
ggoiretrop09044	0.770145	0.942657	1.07439	1.41662	0.656627	1.59095
ggoiretrom26417	0	0	0	0	0	4.70078
ggo_retrop00380	0.742965	1.4287	0.341209	0.211365	0	3.08914
ggo_retrop00524	2.16744	4.48604	0	9.81336	9.5522	2.30208
ggo_retrop00521	0	0	0	0	0	2.85495
ggo_retrom04016	0	0	0	11.1185	0	0.298498
ggoiretrop10021	16.2728	4.504	34.1533	23.1842	13.8624	2.68447
ggoiretrop26541	0.954475	0	0	0	1.05112	0.211657
ggo_retrom00814	5.12472	3.34139	5.65507	2.98189	4.51075	2.80784
ggo_retrop02127	0	0	0	0	0	2.95697
ggoiretrop30697	1.59165	0	0	0	0	0.212517
ggo_retrop02323	2.80228	0	17.514	4.41373	43.4931	3.05652
ggo_retrop01141	0	0	0	0	0	1.78547
ggo_retrom04369	0.0645161	0	0.387293	0	0	5.03149
ggo_retrom00307	8.52914	11.2318	14.7573	9.72293	28.7323	25.5993
ggoiretrom10534	3.20026	3.46798	5.88224	5.1826	8.85894	1.6797
ggoiretrom13390	0	0	0	0	1.39221	45.557
ggoiretrop14507	0	0	0	0	0	5.9686
ggoiretrom28547	254.843	0	502.072	0	0	84.2063
ggo_retrom04531	0	0	0	0	0	1.99201
ggo_retrom03078	1.07643	0	0	0	0	1.92571
ggo_retrom03079	0	0	0	0.202929	0	3.44143
ggoiretrom09189	0.43828	0.363308	1.36196	0.966094	1.8739	0.106247
ggo_retrop04804	7.03556	4.56497	1.17205	1.78584	9.61413	8.18838
ggoiretrop02983	9.22228	6.29773	4.5854	11.8111	3.60963	10.8874
ggoiretrom11878	1.48529	0.73629	0	0	11.7292	0.292337
ggoiretrop10701	0	0	0	0	0	21.3692
ggo_retrop01498	11.3111	23.4988	0	13.3623	21.288	27.048
ggo_retrom02841	0.467009	0	0	2.26916	9.90434	0.216766
ggoiretrop29211	15.8868	0	0	0	0	12.3869
ggoiretrop03092	4.19286	0	0	3.62811	4.47583	4.80828
ggo_retrop04520	71.3881	66.8513	238.761	118.87	137.372	73.4824
ggoiretrom30756	0	0	0	0	0	8.7271
ggo_retrom01031	0	0	0	6.08512	38.2736	0
ggo_retrop00034	3.83891	0	0	3.28335	0	2.84382
ggoiretrom33050	1.66766	1.74898	0.700491	1.08204	0	1.00437
ggoiretrop01589	1.11216	2.51194	0	1.77409	0.841335	0.230833
ggo_retrom00696	0.194306	0	0	0	0	1.49527
ggoiretrom14920	1.42774	2.59129	0	0	0	0.692864
ggo_retrop03051	1.36034	2.67743	3.08895	2.83688	2.47474	11.7194
ggo_retrop03050	1891.62	1036.41	2342.94	1761.77	4314.43	805.033
ggo_retrom02359	0	0	0	4.28482	5.97927	0.769228
ggo_retrom00922	0	0	0	0	0	14.4685
ggo_retrop01592	1.68556	2.07082	2.77028	1.94132	3.12008	0.805902
ggoiretrop09639	25.8364	61.2844	63.6264	69.4741	64.3045	13.854
ggoiretrom25335	0.292549	0	13.7179	0.447248	0	0.899451
ggoiretrom20759	0.699796	1.27058	0	0	0	0.218926
ggo_retrom03138	0.0222989	0	0	0	0	15.3376
ggo_retrom04781	6.85951	30.3878	27.0238	17.6982	28.0347	72.3774
ggo_retrom01796	0.527767	0.600972	0	0.359092	0.356549	3.8772
ggo_retrop02947	1.53196	2.79296	0	1.1471	0	0.222488
ggo_retrop03481	0	0	0	0	0	22.7573
ggoiretrom13088	6.05673	6.60574	0	0.715459	0	0.95201
ggo_retrop03636	0.379481	0.243801	0.137018	0.255462	0	4.01094
ggo_retrom04626	0	0	0	0	0	3.71959
ggo_retrom04620	0.67618	0	0	1.67782	1.2055	1.76701
ggoiretrop09082	0	0	0	0	0	5.01161
ggoiretrop12459	28.7556	10.9008	23.0067	18.8083	36.9618	9.39949
ggo_retrop02725	0	0	0	0	0	3.17542
ggo_retrom04044	3.62914	10.8112	0	4.69392	5.74497	1.13016
ggoiretrom24396	0	0	0	0	0	7.06891
ggo_retrop02787	5.31337	6.69039	3.62187	2.77237	5.99847	5.74726
ggoiretrop06238	0.30686	0	0	0.806848	1.26534	0.718231
ggo_retrop02256	1.29245	1.07468	13.4268	5.54454	3.79726	0.260059
ggo_retrop04158	2.84385	6.19562	0	4.52438	6.18501	1.5852
ggo_retrop02876	61.5767	45.7463	49.3711	46.7629	36.9538	18.9555
ggo_retrom04479	22.4502	10.7881	0	19.5582	20.2947	8.99229
ggo_retrop03640	37.7135	13.9557	7.4688	25.7974	44.8227	19.1796
ggo_retrop03645	0.290028	0	0	0	0	3.52408
ggo_retrop02119	0	0	0	0	3.96526	0
ggo_retrop04453	0.416077	0.849821	0	1.35466	0	0.23317
ggoiretrom00762	1.1753	0	0	0	0	2.22924
ggo_retrop00728	3.97653	3.08355	0	0	0	0.345363
ggo_retrop01800	6.9403	5.66863	5.48419	14.4089	9.10971	5.10437
ggo_retrom01080	0	0	0	0	34.0359	0
ggoiretrop31333	38.2806	28.6787	65.1263	41.0456	20.2216	21.7941
ggoiretrop31485	38.3704	34.2746	49.5553	25.425	19.8574	30.52
ggo_retrop02526	0	0	0	0	0	226.958
ggo_retrom01337	2.19138	0	0	0	1.3513	1.70846
ggoiretrom37118	1.63616	2.68043	0	1.90028	1.17581	1.29642
ggoiretrom37117	0	0	0	0	0	1.43663
ggo_retrop01521	1.81285	1.02677	0	0	0	0.0661715
ggoiretrop10752	19.512	9.99753	0	17.5956	0	0.0863215
ggo_retrom03211	0.353362	3.7953	10.9865	5.62972	7.14383	7.08023
ggoiretrom06444	0	0	0	0	0	1.71465
ggo_retrop02358	0	0	0	0	0	8.62441
ggo_retrop04211	0.061048	0	0	0	0	1.24765
ggoiretrom29834	0	0	0	0	0	1.27767
ggoiretrom18312	2.66779	3.1437	0	1.33453	1.70632	0.953714
ggo_retrom02590	0	0	0	0	0	749.854
ggoiretrom02775	0	0	0	0	0	5.5489
ggo_retrom02045	0	0	0	0	0	2.6095
ggo_retrom01581	13.4117	13.339	7.44692	12.26	11.9147	7.49215
ggoiretrop22102	0	0	0	0	0	2.53216
ggo_retrop03726	139.833	94.485	158.236	54.6465	130.956	46.9632
ggoiretrop26824	0.911597	2.52254	0	0	0	0.0875255
ggoiretrop26311	0.217969	0.298105	0	0	0	3.14925
ggo_retrom04277	0	0	0	0	0	61.5236
ggo_retrom04276	0	0	0	0	0	3.74174
ggoiretrom01362	0	0	0	0	0	3.45684
ggo_retrom02368	0.484201	1.12591	0	0	1.18436	0.392409
ggo_retrom01625	0.274405	1.15228	0	0	0	0.0885814
ggoiretrom32669	0	0	0	0	0	33.9889
ggo_retrom00335	0.66105	1.27144	0.779653	0.705546	0	0.536597
ggo_retrop01930	0	0	0	0	0	4.08086
ggo_retrom04828	3.55412	0.980438	0.739692	1.51634	1.82429	1.91873
ggo_retrop03944	1.24286	1.31542	0	1.49167	0	0.0466
ggo_retrop01096	4.68261	3.65249	1.42845	2.03497	5.7049	9.3533
ggo_retrop01632	8.1314	0	22.2536	5.7974	2.8129	2.8284
ggo_retrop01631	0	0	0	0	0	2.55527
ggo_retrop03007	0.682613	0	0	0	0.661579	4.63371
ggoiretrop27255	0.32037	0.427738	2.84817	4.40451	2.77662	0.62761
ggo_retrom03907	48.991	32.1149	66.1624	54.6251	119.545	13.204
ggo_retrop00694	0.730876	0.555027	0	0	0	1.29048
ggo_retrop00699	27.419	20.5598	35.1822	32.1791	46.1691	25.0905
ggo_retrom02905	38.1664	22.4099	13.3378	24.25	32.0166	32.8959
ggo_retrom02903	0	0	3.99027	1.87426	4.57191	1.02946
ggo_retrom02909	0	0	0	0.316108	0	1.24965
ggo_retrom02908	0	0	0	0	0	1.00501
ggoiretrop10160	8.82559	10.5454	8.03478	6.76097	5.13124	11.3722
ggo_retrom00439	1.18752	3.84154	0	1.47507	0.965604	0.579061
ggo_retrom01743	3.51898	3.39846	7.42797	4.57117	4.33145	2.96396
ggo_retrop01448	0	0	0	0	0	2.52567
ggo_retrop01440	69.7653	52.4751	49.3814	43.2415	46.2419	27.6404
ggoiretrom27262	0.161131	0.389363	0	0	0.375938	8.0077
ggo_retrop00711	3.44605	5.99086	8.77638	5.40573	5.3052	7.2312
ggoiretrop14399	1.93139	1.03313	1.99327	1.20786	1.49446	0.756966
ggo_retrop00833	0.184442	0	0	0	0	1.4849
ggoiretrop00179	0	0	0	0	0	7.56265
ggo_retrop04617	16.882	13.0958	19.7252	29.776	49.4655	34.5745
ggo_retrop04613	3.51518	3.18781	0	2.42048	5.11739	1.86626
ggo_retrom03587	0	0	0	0	0	4.387
ggo_retrom03588	44.3946	44.0142	49.2828	33.3781	47.9615	33.6544
ggo_retrop02800	25.7073	16.7184	9.24849	6.97796	11.8011	2.84278
ggoiretrop26762	0	0	0	0	0	31.7932
ggo_retrop03320	0.418921	1.12379	0.974011	0.610255	0.424961	0.27264
ggo_retrop04793	3.34718	9.92413	6.91679	6.71793	7.75495	24.1636
ggo_retrom00114	3.57099	2.29695	2.20995	2.38194	2.11413	2.40707
ggo_retrom01933	0.235111	0.452567	0.80136	0.761821	4.98912	0.531563
ggo_retrom03263	0	1.27026	0	9.58169	14.4595	0.0910097
ggo_retrom03265	5.27885	4.92258	0	3.27318	3.21082	1.10143
ggoiretrom19370	0.453717	0.735574	0	0.44545	0	2.63494
ggo_retrop04220	0.625044	1.17552	0	0	0	0.0890043
ggo_retrop04224	0.0452072	0	0	0	0	14.1355
ggoiretrom14820	0.845916	0	0	1.3363	1.42432	4.36379
ggo_retrom02797	15.7101	10.488	55.1414	20.465	22.8724	8.16494
ggo_retrom00322	2.09069	2.89137	24.2832	2.76799	4.9605	1.89298
ggoiretrop35960	0	0	0	0	0	17.3269
ggo_retrom03051	0.663851	0	0	0.776438	0	1.32537
ggoiretrom22547	0.863813	0.839197	1.21688	0.882486	0.798764	0.749585
ggoiretrom22540	4.99441	6.53896	0	2.96937	4.92075	1.42473
ggo_retrop02414	267.532	212.051	303.154	348.949	639.27	73.8878
ggo_retrop02412	1213.67	706.113	2445.57	1310.04	1661.18	399.335
ggoiretrom28447	0	0	0	0	0	3.79837
ggo_retrom04493	0.519741	0.335351	1.53081	0	0.18666	17.6165
ggoiretrom12281	8.94913	5.85502	1.84921	1.31798	2.24974	7.96463
ggo_retrom00718	0.790974	1.7188	0	0.982965	0.952062	0.721066
ggoiretrop01021	4.66545	5.59923	0	0	0	0.780939
ggoiretrom35284	9.93939	8.15935	56.5064	29.6749	13.183	8.89761
ggoiretrom34884	0.378027	0.385865	0	0.311751	26.0386	0.254743
ggoiretrom18344	0	0	0	0	0	3.37205
ggoiretrom06779	1.40959	0	0	2.12012	1.43296	0.521621
ggo_retrom03348	0	0	0	0	0	2.07498
ggoiretrop01612	0.815662	0	0	0.748058	1.16303	0.736683
ggo_retrop03995	1.69343	0	0	0	0	4.99435
ggo_retrom01758	0.563557	0	0.625604	0	0.274215	1.12697
ggo_retrop01209	0.486368	1.99662	0	1.0563	1.51468	0.539378
ggo_retrop00151	56.9094	42.9476	87.4818	150.139	281.355	54.5817
ggo_retrop04134	0.649223	0.793239	2.95626	2.23636	1.76827	5.43702
ggo_retrop00930	0.659354	0	4.89484	2.70636	1.76976	0.849767
ggo_retrom03268	296.029	82.8934	57.6748	28.9762	29.2173	21.0049
ggo_retrop01434	12.9463	0	0	0	0	0.0800104
ggoiretrop14679	2.98047	3.15436	6.17572	2.86576	1.97022	61.5974
ggo_retrop00805	1.39621	1.11077	0	0	0	0.0694581
ggoiretrop02897	123.817	39.7724	43.4815	85.5569	67.3457	23.1075
ggo_retrop01663	13.0361	4.89484	5.77441	8.29242	6.6752	9.35269
ggoiretrom18793	10.4683	13.0952	11.3296	14.3542	9.23862	21.4709
ggo_retrom04068	1.9705	2.64384	1.84635	2.33095	5.12408	2.48616
ggo_retrom01151	0.762844	1.75773	0	0.76263	1.87908	1.38015
ggoiretrom25575	4.80923	18.0739	8.50757	8.93651	24.5019	7.06124
ggo_retrom02957	7.80191	3.44057	0	0.74869	0	15.9994
ggo_retrop02583	2.63434	2.16967	1.0954	5.49524	11.7257	1.90194
ggoiretrop21533	0.849423	0.967209	0	0.547631	0.928796	2.44317
ggo_retrop00740	0.781945	0	0	1.66338	0.959899	1.75425
ggoiretrop01723	0.783813	0.992985	0.618088	1.15616	0.605709	1.04297
ggoiretrop09116	0	0	0	0	0	1.01336
ggo_retrop02336	0.521937	0.846643	0	2.0303	0.520519	0.342922
ggoiretrop16215	0.279722	1.85373	0	0	0	1.81836
ggo_retrop01171	0.457685	0	0	0	0	82.2609
ggoiretrop05612	0.916593	1.54674	0	0	0	0.104674
ggoiretrop12019	39.3668	28.4048	35.8539	159.445	114.701	27.6797
ggoiretrop22208	0	0	0	0	0	8.61161
ggoiretrop24697	0	0	0	0	1.45501	0.329025
ggo_retrom03646	0.258152	0	0	0	0	1.01555
ggo_retrop00922	10.1295	9.19261	16.2577	22.6158	22.5889	11.4778
ggoiretrop28955	8.29614	6.78359	4.73111	7.64414	8.55972	15.0959
ggoiretrop19172	5.76173	3.48746	3.45741	2.70352	3.11147	2.89993
ggo_retrom00862	17.4786	24.3419	58.2779	35.989	23.7365	33.0611
ggo_retrom00082	11.4897	26.5316	0	0.809411	0	9.00791
ggo_retrop01506	5.77632	8.92986	6.23261	4.8606	7.37577	5.01381
ggo_retrop00676	96.0626	66.1827	45.4891	34.4103	23.7866	35.9395
ggo_retrop00672	1.31853	1.71354	0	0.455196	0	0.284579
ggoiretrom15737	0	0	0	0	0	3.99581
ggo_retrop03379	10.1122	0	37.7743	8.6249	15.4853	1.85677
ggo_retrop01910	2.23749	0	0	0	3.13318	0
ggo_retrop03593	41.1134	32.7642	0	0.521772	0.845551	14.0374
ggo_retrop01998	8.56893	9.89313	46.6689	10.1191	0	0
ggoiretrop12848	44.8897	20.0466	0	31.3154	15.5684	23.6612
ggoiretrop33012	23.5536	7.39519	7.1954	8.62825	10.9514	3.83496
ggo_retrom02857	4.10538	21.132	0	0	0	3.77661
ggoiretrop10925	44.3453	45.1866	47.2563	46.0907	63.1981	50.598
ggo_retrom04842	0.929783	0	0	2.11218	0	1.20863
ggoiretrom06667	40.449	60.0237	80.4662	55.1104	47.1729	51.8819
ggo_retrop04534	31.1771	8.93065	21.9468	10.8676	11.5389	7.77854
ggo_retrop00022	0	0	0	0	0	2.20605
ggoiretrom26273	0	0	0	0	0	2.29822
ggoiretrom26278	0	0	0	0	0	1.58074
ggo_retrop00349	0	0	0	0	0	1.27559
ggoiretrom29910	1.10845	2.06075	0	2.26897	3.97095	1.33188
ggoiretrop01290	3.77781	11.7694	13.7822	5.95635	12.6592	16.1692
ggoiretrom22658	6.33305	9.36854	3.15177	0	0	2.71872
ggo_retrom04772	0	0	0	0	0	1.74359
ggo_retrom01416	0.953878	1.80761	1.24052	0.830124	1.80591	0.538445
ggo_retrom03485	0.54348	1.16211	0.97202	0.728258	0.61519	1.08774
ggo_retrom00751	0	0	0	0	0	2.14231
ggo_retrop02952	2.17946	1.13877	0	0	0	1.15529
ggo_retrop02541	0.431336	0	0	1.55698	3.61211	0.906751
ggo_retrop03964	6.59145	8.34943	5.12909	0.92911	0.797358	6.70804
ggo_retrop04369	1.2665	0	0	0	0	0.12292
ggoiretrom03565	21.2841	31.7412	84.5896	105.333	100.233	44.5818
ggo_retrom01100	0.620832	1.62471	0	0	0	1.71624
ggo_retrop00444	10.7	8.36392	7.52786	9.17787	12.2634	40.1901
ggo_retrom01818	0	0	0	0	0	1.14254
ggoiretrop23216	1233.43	2237.95	4088.24	4240.77	4796.33	1492.68
ggo_retrop04164	0	0	0	23.6324	28.9924	3.2973
ggoiretrop13414	2.05695	6.1259	0	1.55305	1.47579	0.354693
ggoiretrom01574	2.15884	2.50497	0	0	0	0.117547
ggo_retrom01760	1.47187	0	1.40431	0.985275	0.964799	1.98976
ggo_retrop04449	1.13041	2.16438	0	0	0	0.972845
ggo_retrop04448	16.6639	9.56774	40.3864	40.8165	38.4769	6.76972
ggo_retrop04447	2.19605	0	0	0	0	0.971842
ggo_retrom00170	2.30862	2.7946	0	0	0.859932	1.46411
ggo_retrop01460	1.81779	0.801087	0	4.28447	5.96919	1.23248
ggo_retrop01469	0	0	0	0	0	4.05542
ggoiretrop04692	0	0	0	0	0	2.77873
ggoiretrop11502	22.876	12.1246	18.2006	16.1058	19.1045	14.3372
ggoiretrom06698	0	0	0	0	0	1.03132
ggo_retrom03614	10.6157	16.3964	6.26225	6.89867	34.1945	24.0191
ggo_retrop01694	0	0	0	0	0	3.01969
ggoiretrom08576	9.49791	6.13402	8.3137	27.3161	26.0367	7.84434
ggo_retrop00958	20.2069	9.50482	34.3625	9.8814	7.10761	187.141
ggoiretrop10063	3.00535	3.31059	1.9096	2.65602	2.04422	0.322315
ggo_retrom00857	27.689	25.4256	30.5933	32.9052	44.904	12.3067
ggo_retrom04571	1.12393	1.32351	0	0.506373	0	0.23256
ggoiretrop00651	0.827719	1.19583	0	0.666882	0	0.553394
ggoiretrop07609	47.0174	0	0	0	190.628	48.2036
ggo_retrop03849	0	0	0	0	0	1.19452
ggoiretrom09530	0	0	0	0	0	1.28094
ggoiretrom30555	187.364	104.82	719.156	206.489	248.223	114.233
ggoiretrom32793	3.35942	2.0255	0	1.18269	0	0.965687
ggo_retrop02360	3.80963	0	0	0	0	1.37464
ggo_retrom04329	4.15477	0	0	15.2352	0	3.34298
ggo_retrop03110	0.120316	0	0	0	0	4.62282
ggo_retrop03113	0	0	0	0	0	1.41292
ggo_retrop03114	1.22423	2.62413	3.09885	0.584759	1.26487	0.305833
ggo_retrop02644	0	0	0	0	0	1.10107
ggo_retrom02580	0	0	0	0	0	3.5439
ggo_retrop04568	6.87233	13.9063	2.00876	2.70127	3.28072	0.866388
ggo_retrop04564	17.7509	0	0	71.8246	81.9548	28.2059
ggo_retrop03759	0.832795	1.08106	0	0.921188	1.21216	5.20162
ggo_retrop02089	0.0856388	0	0	0	0	10.1759
ggo_retrop01068	0.494788	1.74903	0	0	0	0.326982
ggo_retrom03719	0	0	0	0	0	3.56528
ggoiretrom23748	119.063	81.676	55.9647	55.3799	98.8274	64.2799
ggo_retrop01929	0	0	0	0	0	5.74699
ggoiretrom01652	0.617731	1.68914	0	0	0	0.256585
ggoiretrop01003	23.3393	18.5236	2.52104	1.53379	0	8.33658
ggo_retrom02474	0.590662	0	0	0	0	2.17212
ggo_retrop00417	2.72367	4.32927	6.41028	5.79596	10.0444	6.24564
ggoiretrom15995	337.314	237	624.649	681.873	832.999	242.981
ggo_retrop03195	0.13658	0	0.517143	0	0.611535	1.62588
ggoiretrop06620	14.9341	17.2478	23.1583	17.4572	12.8984	9.61087
ggo_retrom04164	1.66525	1.3557	0	1.39461	1.04528	0.311957
ggo_retrom00847	1.11226	0.398485	0	0.755735	0.331213	0.149888
ggo_retrop02001	77.3363	47.9211	186.759	195.919	199.492	39.913
ggoiretrom27869	61.949	0	0	56.9574	0	143.01
ggoiretrom05224	2.37627	2.42736	0	0	2.04918	1.15732
ggo_retrop04681	1.30441	0.452873	1.21641	9.39273	9.07262	0.419102
ggo_retrom00269	3.88345	4.91305	4.65762	2.94603	0.980325	2.553
ggo_retrom00265	0	0	0	0	0	1.89143
ggo_retrop00133	0	0	0	0	0	6.47764
ggo_retrop00683	61.124	156.499	99.7138	51.6518	81.2057	262.008
ggo_retrom03517	0	0	0	0.155517	0	3.18152
ggoiretrom22600	2.42954	3.59507	1.06242	0.674089	0.537448	0.722467
ggoiretrop08102	1.006	3.11334	0	1.33631	0.927561	1.66651
ggoiretrop26041	81.0919	87.8063	140.304	211.01	274.721	120.252
ggo_retrom00405	1.08243	1.51092	0	0	0	0.232614
ggo_retrom02120	25.4239	11.017	26.0483	18.507	31.433	7.5073
ggoiretrop09991	0	0	0	0	0	382.46
ggo_retrop00496	0	0	0	0	0	32.5678
ggo_retrop00498	24.1331	15.2973	16.0341	22.3372	20.672	11.7846
ggoiretrom08268	5.14005	2.47422	2.89415	2.21933	1.18398	10.9957
ggo_retrop02536	0.145156	0.608483	0	0	0	1.19148
ggoiretrom22062	6.86454	7.71612	6.30755	5.77043	5.48443	1.51639
ggoiretrom22064	0.789993	0.925236	1.23132	0.837904	0.967581	0.5282
ggoiretrop29582	0.458838	1.50255	0	0.592033	1.73588	0.196955
ggoiretrop17072	0	0	0	0	2.39924	0.219411
ggo_retrop00510	0.230393	1.45332	1.55387	0.342138	0	0.0851215
ggo_retrop03094	0.293771	2.17489	0	0	0	0.23457
ggo_retrom00806	0.870847	1.14753	0	0	0	0.510879
ggoiretrom11370	3.59326	9.9519	0	4.03318	1.42823	1.23401
ggo_retrop03685	0.455917	0	0	3.65525	2.52535	0.182435
ggoiretrop23007	0.0815699	0	0	0	0	4.19476
ggo_retrom00101	0.566635	0	0	0	0	2.25309
ggo_retrom00109	0	0	0	0	1.76779	0.797222
ggo_retrom03341	7.03159	9.38431	35.4975	23.1434	20.8699	7.71632
ggo_retrom01274	0	0	0	0	0	4.17342
ggo_retrop00765	0	0	0	0	0	19.4531
ggo_retrom03256	17.5241	21.7162	22.1675	15.384	5.10925	10.8858
ggoiretrom06401	39.8587	33.3055	57.9479	87.473	93.9247	50.5232
ggo_retrom01757	10.1709	7.66242	7.4201	4.59235	2.84507	5.92836
ggo_retrom01756	35.8788	47.9656	28.8472	15.5137	15.5886	21.4589
ggo_retrop03440	77.0972	21.3496	83.5533	76.3807	279.48	18.3141
ggo_retrop02312	0	0	0	0	0	45.4368
ggo_retrop04251	0	0	0	0	0	1.14859
ggo_retrom02786	0.863847	4.52781	0	1.52848	0	0.402352
ggo_retrom03668	4.62701	4.86257	4.60883	10.7363	16.772	3.81347
ggo_retrop01319	100.607	93.1485	139.434	172.986	199.238	117.608
ggoiretrop02749	0	0	0	0	0	3.24356
ggoiretrom30953	1.68731	1.45652	2.63471	1.48888	1.80797	1.98123
ggo_retrom02661	0	0	0	0	0	5.25543
ggoiretrom33928	2.238	0	0	1.88475	0	0
ggo_retrom04501	32.6406	0	0	0	0	0
ggo_retrop04814	0.0442181	0	0	0.684125	0.812723	1.72978
ggo_retrop04762	0	0	0	0	0	3.53092
ggoiretrop11445	6.81958	8.22641	9.61354	6.59819	4.96077	2.32166
ggo_retrop01480	0.109363	2.04405	0	0	1.3701	0.0917552
ggo_retrop02617	5.32434	6.30584	0	0	3.35415	8.17094
ggo_retrom02557	0.25145	1.95589	0	0	0	0.231822
ggoiretrom06648	2.55034	2.65972	7.15516	3.657	6.12128	0.852232
ggoiretrop14594	45.8903	0	0	57.3978	54.0568	17.2496
ggo_retrop04062	6.43441	12.3144	12.0222	11.671	6.92334	6.0037
ggoiretrop24446	0	0	0	0	0	3.93231
ggo_retrop04303	0	0	0	0	0	82.97
ggo_retrom00213	153.973	123.583	537.368	265.628	649.479	79.077
ggoiretrom36285	0.149932	0	0	13.601	1.12078	0.043435
ggo_retrop01211	12.3501	6.88598	27.9803	0	0	2.23195
ggo_retrop01212	4.71002	5.69591	5.06661	6.39131	5.01989	2.63399
ggoiretrom23185	0.497023	1.2661	0.975048	1.05915	0.942694	0.381601
ggo_retrom04790	0.425642	0	0	0	0.912213	5.31563
ggoiretrom31184	31.3294	26.3835	53.6321	39.006	34.426	40.9399
ggo_retrom03462	1.1236	1.31698	0	0.373906	0.550691	0.561797
ggoiretrom33742	0.295872	2.12352	0.952392	1.88081	1.41805	2.72981
ggo_retrom00033	5.83669	21.9045	4.66416	4.52333	4.96086	3.93588
ggo_retrop00150	425.364	152.3	76.8007	56.5807	72.0231	14.4225
ggo_retrom00620	0.538114	2.43276	0	0	0	31.5092
ggo_retrop03888	2.69756	5.60647	3.01892	2.66177	3.12431	2.64458
ggo_retrop02719	33.583	21.786	18.9119	24.1536	17.5508	18.9228
ggoiretrom30173	1.80406	1.0849	0	0.545561	0	0.710265
ggo_retrom04075	0	0	0	0	0	67.161
ggo_retrom01161	0	0	0	0.50341	6.07307	0
ggo_retrom03540	0.747027	0	2.2378	0	0	0.601434
ggo_retrop02269	0.969324	3.15395	0	3.61518	3.67391	0.308257
ggo_retrop04148	0	0	0	0	0	1.66376
ggo_retrom02948	0.317388	0.451016	0	2.36358	0	0.134423
ggo_retrom03618	2.64582	1.37304	2.15202	0	0	0.699928
ggoiretrom04467	0	0	1.17923	2.30601	3.24075	1.61884
ggo_retrop03674	0.810727	0	4.08068	2.42011	0	0.67596
ggo_retrop03677	10.6062	9.65629	9.80493	21.4134	10.7131	12.9755
ggoiretrop22074	52.1786	81.204	164.482	105.576	112.76	70.6272
ggoiretrom24439	0	0	0	0	0	7.71581
ggo_retrop03790	0.0609854	0	0	0	0	4.9759
ggoiretrop30501	6.29597	2.0651	0	0	0	0.321792
ggoiretrom34607	31.5036	10.6393	0	0	0	4.05502
ggo_retrop01167	0.432183	0.324185	0.521126	0.201343	0.343514	10.8656
ggo_retrop01166	0.1426	0	0	0	0	6.02096
ggo_retrop01168	0.330311	0	0	13.6887	0.856198	0.156937
ggo_retrom04346	0	0.290073	1.13759	0	0.225652	0.175046
ggo_retrom04691	1.17794	0.78584	0	1.28671	0.746537	0.555093
ggo_retrom04699	0	0	0	0	0	3938.82
ggo_retrom02038	1.5686	0	0	1.91215	1.93152	5.99908
ggoiretrop20035	5.92686	4.90331	4.91897	5.96277	3.91298	4.84433
ggoiretrom10554	11.5229	0	67.7187	36.5944	27.4847	27.5076
ggoiretrop12646	74.2508	47.5868	0	0	0	48.4932
ggo_retrom03013	0	0	0	0	1.18815	0
ggoiretrom00465	0	0	0	0	0	1.30158
ggoiretrop00674	9.37988	13.3743	10.6225	7.04306	8.06285	4.41753
ggo_retrop03363	2.33136	0	0	0	0	1.91633
ggo_retrom01200	0	0	0	1.08774	0	0.250311
ggo_retrom01203	0	0	0	0	9.08162	0
ggo_retrom01971	0.718897	0.66126	2.41077	2.0196	1.06696	0.36596
ggo_retrom00756	2.5773	0.861047	0	0.936695	0	0.060903
ggoiretrop37580	4.99361	0	0	2.89308	2.52424	0.970483
ggoiretrom25624	0	0.46328	0	0	0	17.3704
ggoiretrom33172	62.4324	34.4209	0	85.6563	144.445	39.009
ggo_retrop00251	0.612473	0	0	3.64422	0	0.277079
ggo_retrom02975	112.469	204.947	190.909	127.839	0	255.408
ggoiretrop19615	4.02353	7.33264	5.85313	2.25654	2.21976	0.973175
ggo_retrom00945	0.832708	0	0	3.85045	7.14562	2.07686
ggo_retrop03731	8.9881	11.0465	74.9174	68.3682	109.784	4.87053
ggo_retrop03732	19.1589	18.3784	105.078	111.457	136.441	6.68124
ggoiretrop19183	28.6946	24.5112	34.317	26.3826	26.7671	25.1026
ggo_retrop03074	0	0	0	0	0	9.76495
ggo_retrom03775	0	0	0	0	0	56.6997
ggoiretrom26992	0.334371	0	0	0	0	25.0148
ggoiretrom08414	0.920018	1.16793	0	0	0	0.228063
ggo_retrop02456	4.37644	8.34004	10.9493	5.37208	8.10414	15.4602
ggoiretrop28145	0.755509	0	0	1.09155	0	1.25646
ggoiretrop31429	0	0	0	0	0	17.5919
ggo_retrom01402	0.134312	0	0	0	0	12.3982
ggo_retrom01404	52.9515	0	0	0	0	0
ggoiretrom11779	0.676536	1.21154	0	0	0	0.514825
ggo_retrop03201	8.71309	8.62945	11.1742	20.2668	7.30472	10.4839
ggo_retrom04149	0.568602	1.14275	1.29613	1.29092	1.92151	24.5379
ggoiretrom21144	1.08951	1.07312	2.30683	0.73978	0.732327	5.30684
ggoiretrom20997	3.88166	2.78441	0	2.48542	2.19348	1.39981
ggoiretrom11488	0.124636	0	0	0	0	58.424
ggo_retrop01627	0	0	0	0	0	4.01477
ggo_retrop01622	5.62354	7.96276	14.9307	22.3005	29.5918	4.74495
ggoiretrop26650	1.84901	2.53118	2.41604	1.51523	2.11878	1.02074
ggo_retrop04375	1.96596	1.54564	1.40492	0	0	0.310568
ggo_retrom00242	1.28172	0.552651	0	1.00284	0	2.38331
ggoiretrom04923	25.1601	18.7429	15.8014	72.0154	154.728	6.62758
ggo_retrop02237	0.783158	0.938747	0	1.53676	0	0.692979
ggo_retrop04179	2.86979	1.62264	3.78384	1.31349	5.13574	6.08716

## Sheet: Orangutan
# Supplemental Table S3: Retrocopy expression in orangutan
# Expression data are in FPKM; each value corresponds at the median FPKM across all samples from that organ
retro_ID	Brain	Cerebellum	Heart	Kidney	Liver	Testis
ppy_retrom12756	0	0	0	0	0	4.53364
ppy_retrop05545	1.47846	0.414686	0	0.373569	0	0.525452
ppy_retrom17033	0	5.15437	0	0	0	1.58492
ppy_retrop12789	9.41578	3.1862	1.71178	1.96365	1.95013	4.89958
ppy_retrom13363	2.05059	6.17701	4.05066	1.38554	0	0.90592
ppy_retrom16162	0	0	0	0	0	1.58257
ppyiretrop26965	4.45627	1.14627	2.60726	2.73072	3.27293	7.96601
ppy_retrop00615	95.4078	37.3199	117.869	168.183	51.8946	0
ppy_retrom12945	0	0	0	0	0	9.36923
ppy_retrop04186	1.55069	0.780226	0	4.29434	1.91464	5.82505
ppy_retrop09217	80.1569	29.7443	82.4187	83.389	173.59	668.467
ppy_retrom12209	57.9559	17.8965	48.694	39.2879	75.4641	372.075
ppyiretrop36790	75.0213	43.3727	50.1455	26.6828	78.6063	0
ppyiretrop37225	1.09168	3.31491	0.88156	0.774677	0.34726	1.19769
ppy_retrom08878	111.977	22.7976	273.505	308.264	214.635	0
ppyiretrop18182	0	4.18046	0	1.86539	1.40366	0
ppy_retrop12477	1.52081	0.677714	0	0	0.304869	1.10423
ppyiretrop23634	5.03655	5.99163	5.642	4.43202	6.22835	6.28524
ppy_retrom15061	0	0	0	0	0	50.3297
ppy_retrop17216	0.856346	4.17399	0	0	0	0
ppy_retrom03318	1.1474	1.98526	0	2.04153	1.22373	0.802535
ppyiretrom42243	3.63601	0	0	30.3828	117.086	1.04516
ppy_retrop18667	538.58	337.243	999.497	2246.24	3558.12	0
ppy_retrom15387	0	0.696837	0	0.951669	0	15.3571
ppy_retrom13244	0	0	0	0	0	4407.89
ppyiretrom36338	0	0	0	0	0	3.48242
ppyiretrop10803	1.23676	0.955552	0	0	1.19801	0.509819
ppyiretrop24979	0	0.500168	0	0.700821	0	1.60684
ppy_retrom10592	0	1.77253	0	1.73336	2.91094	1.74969
ppy_retrom02137	0	1.37807	0	0	0	0
ppy_retrop17437	1.2443	1.80456	0	0	0	0.240857
ppyiretrom38747	7.51941	5.92693	9.39305	16.9016	10.0457	36.4473
ppyiretrom16507	17.7376	6.1915	19.9106	40.8727	44.0891	0
ppyiretrop13256	0	0.997291	0	0	0	2.74107
ppy_retrop04618	0	0	0	7.46628	6.62727	7.33616
ppyiretrom41230	102.098	16.6273	90.1238	150.664	208.424	50.6729
ppy_retrom00832	0	0	0	0	0	1.25952
ppy_retrom08931	0	0	0	2.1817	0	4.92811
ppy_retrop09365	0	0	0	0	0	28.9805
ppy_retrom12113	0.480991	0.666825	1.5277	3.63626	3.12152	0.162458
ppy_retrom00057	1.82081	1.5335	1.00944	0	0	2.10538
ppy_retrom15465	0	0	3.88976	5.55031	3.97391	0
ppy_retrop16011	306.028	201.733	946.775	1091.19	614.907	163.354
ppy_retrom17630	1.4516	0	0	0	0	0
ppy_retrop12274	46.6596	29.6238	103.971	76.5784	58.1641	105.437
ppy_retrop11465	0	8.33172	0	0	0	0
ppy_retrop17703	0	0.421321	7.80803	0	0	0
ppy_retrom05684	0.166114	0	1.7836	0.169757	0	0
ppy_retrop10277	0	0	2.07362	3.18885	12.7186	0.848886
ppyiretrom01610	0	1.13678	0	0	0	4.12111
ppyiretrop02558	7.10808	5.93418	8.24408	5.9912	3.24707	0.765622
ppy_retrop04853	0	1.16796	0	0	0	0
ppyiretrom08152	646.309	1232.97	1549.32	1040.89	1432.93	0
ppy_retrom10704	0	0	0	0	0	220.401
ppyiretrop36808	72.9073	61.2475	0	40.8431	37.7018	0
ppyiretrom23014	69.9662	50.2143	37.3765	35.0127	47.9471	35.0218
ppy_retrop15191	28.9679	21.0056	26.5424	13.6649	13.7832	10.3849
ppy_retrom15259	1.41462	3.7943	4.06444	2.59325	0	1.30732
ppy_retrop01742	3.6756	3.35258	1.65018	0.919825	0.369555	1.36552
ppy_retrop00298	0	0	0	0	2.39671	0
ppy_retrom11823	0	0	0	2.54259	0	1.15747
ppyiretrop34054	4.16285	0.644133	0	0	0	0
ppy_retrop14131	0	0.171052	0	0.473405	0	2.4655
ppyiretrop37566	6.305	0	0	5.3494	7.7223	0
ppyiretrop17378	22.0182	36.2823	37.2538	57.5116	69.4112	21.6587
ppyiretrom23420	26.073	24.9058	44.0552	29.1946	26.4819	0
ppy_retrop06007	1.40984	2.16477	1.10284	1.66262	0	1.4701
ppy_retrom16166	0	0	0	0	0	18.8385
ppyiretrom00847	1.32027	2.40366	1.14633	1.61834	0.45981	3.18006
ppy_retrom09401	2.66217	4.27112	2.42115	3.20594	3.21728	1.61129
ppy_retrop03545	0.772049	0	0	1.25615	0	0
ppy_retrom17155	12.7742	9.39982	12.3818	9.44913	8.77052	7.93752
ppyiretrom23119	26.2829	19.7727	23.2615	20.1771	24.2464	0
ppy_retrop07879	0	0.852703	0.815337	1.18696	1.24218	3.70201
ppyiretrop27845	4.62437	6.31376	5.32423	4.65943	4.28788	1.94709
ppy_retrop13897	0.631547	0	0.797205	1.63789	0.765249	11.0227
ppyiretrop09171	1.52679	3.34381	2.25607	1.70465	1.63276	0.0485688
ppyiretrop03633	0	0	0	3.53422	0	0.527024
ppy_retrop16323	8.71308	4.06266	0	0	0	0
ppy_retrom01843	1.36968	1.06496	2.44142	5.66087	4.64651	6.24497
ppy_retrom08940	0.313875	0.601539	0.539867	0	0.463116	1.52783
ppyiretrop13848	5.80348	2.97739	4.53012	3.36144	1.6973	2.37652
ppy_retrom07290	0	85.4398	185.279	173.369	235.937	398.682
ppy_retrom09522	90.5372	32.3026	326.63	179.457	256.804	45.9843
ppy_retrop15734	0	0	0	0	0	2.27971
ppyiretrop32895	0	0	0	0	0	2.36855
ppy_retrom13994	0	0	0	2.85966	1.81166	0
ppy_retrop19053	0	0	0	0	0	1.77486
ppy_retrop19059	2.43832	4.32024	7.15708	3.06447	4.79874	2.19809
ppyiretrom23389	2.01563	3.05415	6.15886	6.79269	7.3145	0.446814
ppyiretrom28823	140.003	129.06	110.23	150.022	132.859	275.959
ppy_retrom07763	0	2.89658	0	0	0	0
ppyiretrop31719	0	0	0	0	0	462.263
ppy_retrom15416	0	0.737912	0.589407	1.11676	0	1.16088
ppyiretrom24731	3.94008	1.06189	0	0	0	1.57554
ppyiretrop38578	0	0	0	0	0	140.183
ppy_retrom02272	0	0	0	2.93394	2.79662	24.3572
ppy_retrop17929	0	0	0	0	0	1.21607
ppy_retrom02856	0	0.817014	0	0	0	9.59199
ppy_retrop12412	1.08482	1.03622	0	0	1.71628	0
ppyiretrop34084	3.25831	4.0149	0	1.57415	5.06189	0
ppy_retrom07390	14.0851	6.72733	16.4955	9.72132	48.6654	1.01831
ppy_retrom16063	0	0.882985	0	0	0	8.32196
ppyiretrom34540	151.908	108.934	260.402	205.539	385.942	755.134
ppy_retrom13303	0.100499	0	0	0	0	4.62428
ppy_retrom13301	2.48521	1.40008	0	0	0	19.8383
ppy_retrop13793	69.097	50.979	86.3041	67.0115	65.6017	34.9004
ppyiretrom10562	0	0	0	0	0	26.0923
ppyiretrop05555	42.9559	27.2494	1.6777	2.68399	0	3.09926
ppy_retrom17240	0.492786	0.741452	0.804766	1.42935	1.10621	0.655537
ppyiretrop26408	34.406	15.0438	48.4851	43.4244	22.6919	2568.28
ppy_retrop03061	0	0	0	2.2315	0	0
ppyiretrom07059	5.14853	5.25886	4.4103	6.42132	31.1072	8.20408
ppy_retrop19265	1.34175	1.15472	0	0.215755	0	0.332783
ppyiretrom11492	17.301	22.0916	15.1885	66.4877	176.165	14.8238
ppy_retrom17160	1.5995	2.78593	4.1996	0	8.48956	4.17528
ppy_retrop18476	11.8554	5.25689	10.5315	4.31188	14.5722	70.2766
ppyiretrop17433	0	0.781111	0	0	0	4.38934
ppy_retrop07822	0.511909	1.27837	0	0	0	0
ppy_retrom06949	0	0	0	0	0	47.1735
ppy_retrop18214	0	5.1738	0	0	0	0
ppyiretrom12923	1.04988	1.03891	0	9.39431	0	1.38982
ppy_retrom16443	1.08248	0.50378	0.537687	2.6806	0.731681	0.468293
ppy_retrom10298	0	3161.85	0	0	0	0
ppyiretrop32773	0	0	2.69193	2.01791	0	0.369079
ppyiretrom12767	0	1.16667	0	0	0	0.952541
ppy_retrom10310	3.68855	3.67191	2.93999	2.7444	0	5.04888
ppy_retrom10314	0	0	0	1.12403	0	0
ppyiretrom04773	33.7211	23.3945	56.2252	64.5968	48.5609	5.09945
ppyiretrop29894	33.1904	44.5844	0	0	18.8033	0
ppy_retrop18160	0.517592	0.366036	2.14649	2.80817	1.64125	2.82291
ppyiretrop09598	1.87559	3.35666	1.95589	2.15769	0.712826	0.027417
ppy_retrop14277	0.860335	1.37806	0	0	0	12.9255
ppy_retrom07619	0	0	0	0	0	12.9423
ppy_retrop10290	1.26443	2.01526	0	0.656983	0	0.214477
ppy_retrop10296	0.769797	2.31161	0	2.6283	0	0
ppyiretrop37367	19.1552	27.5058	63.0641	31.2035	43.9172	0
ppyiretrop15865	16.1633	4.19327	0	22.8274	0	0
ppy_retrop12634	149.323	52.507	228.486	253.741	188.63	25.2701
ppy_retrop00958	0.49222	0	1.65646	1.1452	0.893362	1.46642
ppy_retrom15855	29.3156	47.1356	71.7673	36.674	61.5636	70.1929
ppy_retrom15857	0.931514	6.13338	0	0	0	0
ppyiretrop30463	3.7103	2.28106	1.01813	0	0	0
ppy_retrop13613	0	0	0	0	0	1.25927
ppy_retrop13617	23.5485	21.6797	11.3181	8.4656	11.2892	9.8049
ppy_retrop11444	0.491135	3.47014	1.44489	1.53915	0	2.4214
ppy_retrop15249	0	0	0	0	0	37.5481
ppy_retrom02809	4.30999	4.43872	1.33913	8.46372	1.67783	1.61184
ppy_retrop13427	0	0	0	1.04466	0	11.1216
ppyiretrom01635	10.3563	7.43706	3.0388	1.58056	0	0.690594
ppy_retrop16685	0.189324	0.0796789	0.214356	1.05096	0.744368	6.94742
ppyiretrom34532	51.5311	72.1824	167.72	161.356	276.11	76.8485
ppyiretrop28645	4.40147	0	0	4.29873	0	27.9764
ppy_retrop14536	0	0	0	0	1.23829	1.12442
ppyiretrom10178	1.35773	0.327885	0	0.2711	0	0
ppy_retrom05553	0	0.257417	0	0	0	1.3563
ppyiretrom24202	1.43981	0.826924	3.13483	3.89417	4.21137	3.92653
ppy_retrop08030	0	0	0	0	7.02735	0
ppyiretrom27925	8.82781	3.04132	0	0.984507	0	37.6659
ppy_retrop09801	0	1.11662	0	0.570291	0	0.241643
ppy_retrop13699	0	0	0	0	0	17.5502
ppyiretrom09123	0	0	0	0	0	1.49858
ppy_retrop08990	83.1128	95.1662	210.235	249.503	422.822	494.239
ppy_retrom09850	0	0	10.2155	4.1928	16.1109	60.8408
ppy_retrop17958	0.657572	0.287207	0.639928	1.90868	1.17977	1.87661
ppy_retrom15275	0	2.66123	0	0	12.6843	0.507229
ppyiretrop09385	2.18854	2.60549	3.70724	2.53753	3.06931	0.0343533
ppy_retrop05470	0.376982	2.40772	0	0.340635	0	2.65326
ppy_retrop06927	0	0	0	0	0	46.2968
ppy_retrop10434	0	0	0	0	0	4.23419
ppy_retrom15925	6.90964	10.1162	4.9893	4.88621	7.74687	4.96549
ppy_retrop13834	0	0	0	0	0	1.78869
ppy_retrop18241	0	0	0	0	0	3.11042
ppyiretrop02346	0	1.96823	0	0	0	0
ppy_retrom10262	0	0	0	0	0	2.43105
ppy_retrom07797	0	1.11822	2.48203	1.67103	0	0.619521
ppy_retrom00264	0	0	1.19721	0.169626	0	0
ppy_retrop13974	6.17831	2.75745	3.32266	2.72605	2.98745	4.61219
ppy_retrop06236	0	0	0	0	0	2.85267
ppy_retrom04985	0	0	0	0	12.065	0
ppy_retrom02124	0	0	0	0	0	5.51094
ppy_retrop11490	10.6601	9.4837	13.3374	8.44583	11.3361	3.41951
ppy_retrop17794	1.63833	2.05384	2.72677	3.6446	0	1.33101
ppyiretrop02448	2.51678	5.54359	4.23245	4.85772	1.95342	0
ppyiretrom08379	0	0	0	0	0	14.2267
ppy_retrom06910	27.6893	14.1897	22.9851	25.7801	35.4656	19.7219
ppy_retrom02700	0	1.06694	0	2.3408	4.85943	0.591956
ppy_retrom12372	0.379705	0.623946	1.36775	1.18826	1.79887	0.694554
ppy_retrom13556	0	0	0	0	2.56904	0
ppy_retrom12535	118.606	37.3256	215.004	129.214	183.591	0
ppy_retrop13587	7.30947	7.0194	3.36572	3.13404	7.79588	12.1334
ppy_retrom04007	5.8872	4.90191	7.7431	7.94865	12.6847	18.3482
ppy_retrop07402	0	0	0.939019	0.760094	0.755434	43.9191
ppyiretrop02815	1.2882	0.925528	0	0	3.61752	0
ppyiretrom40638	100.124	73.6182	141.25	155.597	227.183	322.796
ppy_retrom10693	228.643	125.856	494.311	237.091	596.648	836.92
ppy_retrom09504	4.4938	2.45846	0	3.535	5.9898	0
ppy_retrom00100	26.9465	30.4956	10.5762	6.8482	2.7229	2.06413
ppyiretrop06521	0	2.29274	0	0	0	0
ppy_retrom13199	1.08998	0.855684	0.412267	2.67892	0.945348	9.58556
ppyiretrom26748	0	0	0	0	0	4.75334
ppy_retrom18353	348.978	82.7744	1146.13	556.621	1102.75	0
ppy_retrom16962	0.54415	0.503019	4.18277	0	0	0
ppy_retrom07553	499.169	444.338	1049.47	651.01	1037.18	681.892
ppy_retrom13601	1.04694	2.75359	1.99404	1.51641	0	0.607975
ppy_retrom05049	0.527262	4.06798	0	0	0	0
ppy_retrom07579	2.57342	3.17695	4.04977	6.61946	6.13796	5.51964
ppyiretrop12099	0	0	0	0	0	2.09072
ppyiretrom28027	3.71924	4.25044	0	1.96484	1.65072	0.303938
ppy_retrop14504	0	0	2.6365	0	0	2.00679
ppy_retrop13310	1.02241	1.71769	1.5865	0.57022	0.886633	1.63523
ppy_retrop13315	0	0	0	0	0	2.40203
ppy_retrop08000	1202.7	331.615	495.049	505.184	826.439	0
ppy_retrop17335	0	0	0	0	11.3415	0
ppyiretrop30414	0	1.46795	0	7.73348	21.3135	1.02953
ppy_retrom10610	0	0	0	2.5622	1.38125	0
ppyiretrop29446	45.9375	21.7915	157.693	133.487	73.3652	954.727
ppy_retrom11989	232.961	153.727	484.015	477.167	661.798	551.052
ppy_retrop12944	3.095	4.0363	0	3.72612	5.04474	9.89384
ppy_retrop02429	0	0	0	0	0	2.34837
ppy_retrom16234	0.287732	1.27716	1.47759	2.22132	1.38415	0.49353
ppy_retrop13477	0	0	10.0715	0	0	0
ppy_retrop17147	0	0	0	0	0	4.97071
ppyiretrom12942	3.89653	4.63622	4.15008	7.74292	17.1361	6.7478
ppy_retrop12665	0	134.039	0	0	0	0
ppy_retrop16396	1.59539	2.65698	1.53795	1.69503	2.70511	0.37753
ppyiretrom15828	2.69487	5.0829	3.24813	6.44106	7.44598	10.4661
ppy_retrom08661	0.562442	1.88833	0	0	0	0
ppy_retrop10664	0	1.40271	0.797933	0.884581	2.40605	1.63225
ppyiretrop37262	0	0	0	0	0	6.1504
ppy_retrop17472	0	0	0	0	0	11.9798
ppyiretrom35470	239.85	79.6804	59.9529	47.5181	39.5023	4.17121
ppy_retrom18526	0	0	0.336051	0	0.35993	6.43521
ppy_retrop10463	0	0	0	7.23703	0	0
ppy_retrop16668	7.61284	8.0536	45.569	14.4893	17.4673	21.2036
ppyiretrom28090	1.33862	0.625183	0.752915	0.892142	0.878453	0.638948
ppy_retrop14005	2.30527	6.11105	5.02441	2.78567	1.97363	0.707079
ppy_retrop19173	2872.74	1109.55	0	1740.16	1902.59	0
ppy_retrop16319	0	0.572574	10.1174	17.5986	0	0.498615
ppy_retrom13206	9.34126	12.4009	10.1941	0	0	1.15864
ppyiretrop04716	3.69181	2.42649	0	1.92697	0	5.40124
ppy_retrom13772	0	0.623638	2.1938	0	0	3.64074
ppy_retrop06824	1.21274	1.4888	0	0.516048	0	0.366115
ppy_retrop16437	2.64427	5.71959	4.30007	3.57312	3.78858	3.18968
ppy_retrom17882	1.05503	0.506435	1.50123	7.21788	3.09943	0.546971
ppyiretrom30618	0	1.05672	0	0	0	18.2603
ppyiretrop02753	0.652954	1.88522	0	0	0	0.33128
ppy_retrom16919	35.0772	45.5832	0	43.7345	59.0689	1780.1
ppy_retrom06270	8.21326	5.192	8.07938	2.72747	0	3.13748
ppy_retrom05565	0.220397	0.334491	0	0.0899633	0	1.68722
ppy_retrom07635	52.0537	33.0378	107.122	132.851	180.312	262.028
ppy_retrom13989	1.06564	1.18117	0	1.16981	0	1.36993
ppy_retrop07017	0	0	0	0	0	130.985
ppy_retrop14552	0	0	0	0	6.64684	2.34489
ppy_retrom05300	1.19664	2.08417	0	0	0	0
ppy_retrom13860	49.1415	63.0204	71.3929	79.3196	97.4846	148.456
ppy_retrom11135	4.76076	4.84641	5.1141	23.7617	28.9801	7.5527
ppyiretrop27185	47.2433	38.0092	51.6704	91.8024	106.544	1279.83
ppy_retrop12234	1.10633	0	0.615861	2.40563	4.00296	22.7889
ppy_retrop12585	0	0	0	0	0	255.881
ppy_retrop05403	1.45472	0.641406	1.1187	0	0	0.351478
ppy_retrom15212	0	0	18.4541	0	0	0
ppyiretrop42021	0	0	0	0	0	9.13623
ppyiretrom00170	0.828082	0	0	0	0	1.13726
ppy_retrom17022	2.744	1.86137	4.1338	2.92354	4.22805	4.47956
ppy_retrom05072	0	0	0	1.06435	0	2.17509
ppy_retrop03133	0	0	0	0	0	1.38116
ppy_retrop03135	1.81004	1.73242	1.82116	1.82276	0	0
ppyiretrop34875	2.33696	2.04306	3.7317	0	0	0
ppy_retrom08556	0	0	0	0	0	50.0363
ppy_retrop07091	1.26891	0.713613	0	0	0	1.20479
ppyiretrom03417	3.59952	3.5141	3.6607	4.59063	5.46561	0
ppy_retrop16501	0.57687	1.10212	0	0	0.971053	0.276328
ppy_retrop19257	0.331303	0.542092	0	0	0	37.8434
ppyiretrop15925	15.3831	21.4325	22.9475	15.9186	17.2721	3.60874
ppyiretrom04728	10.3024	16.1755	9.94599	3.99297	2.3942	2.86275
ppyiretrop28749	1.68958	2.85781	1.69215	1.34445	2.93735	1.42038
ppy_retrop14458	0	0	0	0	0	6.35849
ppy_retrom07904	0	0	0	233.737	131.092	148.876
ppy_retrom09870	64.2204	0	0	157.068	362.081	0
ppy_retrop19476	0	0	0	0	0	1.5704
ppy_retrop17960	0	1.36258	0	1.75974	0	0.762807
ppyiretrom17267	3.97034	4.62721	9.26841	10.9783	7.67425	6.54695
ppyiretrom17262	0	0	0	0	0	35.9574
ppyiretrop21014	1.17686	2.72109	0	0	0	0.599053
ppy_retrop03208	37.9398	23.3778	79.0503	77.6915	87.0327	65.9581
ppyiretrom03145	100.698	51.8777	60.761	104.029	74.0116	0
ppy_retrop12609	158.629	39.8464	121.841	50.0605	85.0242	0
ppyiretrop15529	987.749	715.326	1842.56	2323.2	2336.35	7091.67
ppy_retrom18702	0	0.416409	0	1.09671	0	0.609244
ppy_retrom15396	0	2.42356	0	0	0	2.01464
ppyiretrop33491	12.6576	6.44919	3.30293	3.43297	0	18.7649
ppy_retrop19120	0	0	0	9.45702	0	2.64233
ppy_retrop07468	1.48792	0.732306	0.710784	1.20905	0.888796	0
ppyiretrop18937	0	0	0	0	0	3.56257
ppy_retrom02916	0	2.00676	1.84008	0	0	0
ppy_retrom08618	169.311	116.714	210.019	241.366	328.694	139.653
ppy_retrop18151	0	1.29319	0	0	0	0.583061
ppy_retrop03188	0	0	0	0	0	11.3527
ppy_retrop10117	10.6478	7.36061	16.2387	18.0709	38.5761	40.2974
ppyiretrop20933	10.9982	7.37935	7.40309	9.9643	2.49544	2.75125
ppyiretrop08662	14.4312	10.4634	3.81692	15.9046	5.32982	1.87741
ppy_retrom15638	32.9695	18.9557	28.8638	18.5174	40.3481	20.5956
ppy_retrop00572	0	0.930345	0	0	0	1.26432
ppy_retrom06879	0	3.99029	0	6.67452	9.28267	46.5528
ppy_retrom03815	0	0	0	0	0	1.74948
ppyiretrom23577	0	0	0	0	0	83.9526
ppy_retrom17629	5.44164	0	0	4.81994	2.22441	0
ppy_retrom17624	8.15477	4.91906	3.72132	3.82824	31.9602	22.9242
ppy_retrop12262	1.56798	0.661093	1.06712	1.66413	0	0.984051
ppyiretrom10873	2.38917	4.47333	1.67092	2.87601	2.54972	4.74224
ppy_retrom12733	0	3.23748	0	0	0	1.83843
ppy_retrop05889	1.4016	0.357556	0	0.425536	0	1.25848
ppy_retrom17013	1.81728	1.44769	0	0.304317	0	0.633134
ppyiretrom28041	4.65696	5.08021	2.82082	3.15867	2.76969	2.62123
ppy_retrom18073	3.76788	3.3059	3.61198	3.54265	26.4102	0.277384
ppy_retrop04834	0.703458	1.79931	0.364089	0.216124	0	0.310339
ppy_retrop16860	0	6.08188	0	0	0	48.4771
ppy_retrom08761	2.41767	0	0	0	0	0.315022
ppy_retrop18578	0	1.84861	2.38315	2.91757	0	0
ppyiretrom41160	0	1.15509	0	0	0	0
ppy_retrop07948	16.5782	11.7351	11.6753	10.6977	2.93332	35.2286
ppy_retrop10563	24.3284	29.757	56.6435	63.1509	110.229	30.572
ppy_retrom10571	21.7626	4.90972	35.7257	33.8925	47.9053	15.7016
ppy_retrop17116	177.892	158.082	594.753	1548.31	4227.29	2545.47
ppyiretrom35392	0	0	0	0	2.62171	0.111923
ppy_retrom09841	0.735097	0.943983	0	1.14184	0.493709	0
ppyiretrop20971	1006.02	459.275	1004.31	1085.13	1875.55	1784.59
ppy_retrop11534	1.95574	4.83078	0	1.6737	1.70119	1.29619
ppy_retrom01069	0	0	0	0	0	10.3107
ppyiretrop10985	1.94068	0	2.1935	2.60977	2.18641	5.07598
ppy_retrom17755	4.14252	4.92051	0	13.4182	14.3075	236.994
ppy_retrom05356	5.77553	3.44217	13.6818	7.44716	11.4346	0
ppy_retrop03024	762.586	199.802	66.2918	51.2651	67.8832	32.4371
ppyiretrom09082	6.99034	6.30591	0	0	0	6.79534
ppy_retrom05643	0	4.98441	3.97003	22.6774	38.4404	0
ppy_retrop17603	0	1.87017	0	0.922761	0.933029	0.337358
ppyiretrom34267	0	0	0	0	0	46.5334
ppyiretrom32311	1.03553	0	0	0	0	0.598852
ppyiretrop32148	28.5533	8.49212	0	15.3633	17.0982	44.2694
ppy_retrop07868	8.00917	7.04597	16.6458	22.9314	31.9744	18.4598
ppy_retrop07860	0	1.00872	0	0	0	1.65212
ppyiretrom03852	0	0	0	10.1784	57.7505	0.0758528
ppy_retrop14239	432.54	155.188	90.2377	40.8291	41.5054	19.9505
ppy_retrom15041	0	0	0	12.7295	0	0
ppy_retrop11314	10.4015	11.3567	12.8388	11.0713	14.7259	6.27938
ppy_retrom18249	69.8271	21.7749	41.2415	35.5017	27.603	0
ppy_retrop13259	0	0	4.42335	9.41756	6.85719	0
ppyiretrop05665	8.95932	15.669	0.885939	0	0	1.1346
ppy_retrom11314	0.652347	1.70254	0	1.17177	1.54844	3.48248
ppy_retrop16333	5.34466	2.19055	8.59682	5.57969	2.76972	13.6056
ppyiretrom22227	3.53058	4.33828	4.4241	1.5096	0	0.911994
ppy_retrom18164	2.90872	3.57995	0	0	0	0
ppy_retrop13659	0	0	0	0	0	6.95393
ppyiretrop08464	2.25101	2.84239	4.15279	5.5268	9.39103	10.5819
ppy_retrom18366	0	0	0	0	5.20915	18.5441
ppy_retrom16028	2.6653	3.95284	0	6.21406	5.25722	0
ppyiretrom27881	5006.3	1858.74	31617	31303.7	21679.7	0
ppy_retrom12816	0	0	0	0	0	55.3452
ppy_retrom15891	1.07396	0	0	0	1.14098	0
ppy_retrom15895	5.48916	6.04728	0	2.40975	3.30694	10.2004
ppy_retrom00521	0	0.3612	0	1.05956	0.774913	5.40119
ppy_retrop16071	14.6579	9.5906	26.1655	18.5119	24.9298	84.0578
ppy_retrom10600	0	0	0	0	0	11.6827
ppy_retrom16292	0	0	1.88023	2.01145	2.58502	1.14611
ppy_retrop06889	171.207	216.795	417.287	361.85	457.905	0
ppyiretrom09167	0	0.295073	0	0	0	2.26001
ppy_retrom07222	0	0.947503	0	0.619637	1.88944	0.751965
ppy_retrop14308	0	0	0	0	0	2.63863
ppy_retrom01954	0.583078	0.591913	0	0.724969	0.598869	4.59542
ppy_retrop18366	3.51732	0.87058	3.9398	1.61449	2.28431	5.79733
ppy_retrom04372	0	0	0	0	1.0712	0.864671
ppyiretrom14451	0	0	0	11.8384	4.07584	4.88115
ppyiretrom10344	0.948523	0.939822	0	1.18842	1.00512	0.328524
ppy_retrom16239	3.53759	3.19191	2.93343	1.93016	0	2.5051
ppy_retrom07525	28.0698	27.3533	25.0923	42.9654	45.1332	63.1179
ppy_retrop15992	200.924	87.6917	136.519	84.0437	132.109	83.1687
ppy_retrom10657	0	0	0	1.19777	0	2.72368
ppy_retrom12047	0	0	0	0	0	2.98115
ppy_retrom12044	0	0	9.37733	1.56098	0	41.5697
ppyiretrom28681	133.088	92.0603	86.7468	79.2185	220.431	99.396
ppy_retrop03058	109.38	96.7878	276.944	209.511	328.565	125.914
ppy_retrop14634	9.54154	7.40706	8.67237	17.2776	7.21762	7.68346
ppy_retrop19274	65.6221	24.1237	89.9839	129.72	123.105	52.03
ppyiretrom11959	0	0	0	1.71152	4.74296	0.924657
ppyiretrop21600	109.018	36.8783	102.354	142.464	161.713	521.16
ppy_retrop14437	1.09996	0.379704	0	0	0	7.11855
ppyiretrop38637	1.15498	3.0625	1.78233	3.42541	4.01719	2.16384
ppyiretrom02628	0	2.29754	0	0	0	0
ppyiretrop03221	2.42893	0	0	0	0	0.181249
ppy_retrop10678	13.5664	11.5571	17.4973	13.1133	10.8038	9.87497
ppyiretrom23174	0	0	0	0	2.84449	0.381272
ppyiretrop02408	0	0.730929	0	0	0	3.86332
ppy_retrom18655	11.1877	12.8688	28.4764	18.5931	28.3435	49.8323
ppy_retrom06951	4.84549	3.08939	17.0375	10.971	11.2193	12.1571
ppy_retrop17264	1.78031	3.85243	0	0	0	1.10639
ppy_retrom16615	0	0	0	3.27106	4.40307	0
ppy_retrop09185	0	0.553976	0.544991	0.28402	0	2.93887
ppyiretrom10428	0	0	0.900095	0	1.66117	0.460641
ppy_retrop14017	2.29438	0.974075	0	0	0	2.73565
ppy_retrop17655	0	0	0	0	0	3.43702
ppyiretrom16234	212.535	208.076	546.081	465.386	607.827	950.772
ppy_retrom07416	20.6411	24.4683	32.514	17.3901	29.8077	19.9724
ppy_retrop11186	0	0.346623	0	0	0	2.31021
ppy_retrop01806	0	0.506539	0	0	0	1.17544
ppyiretrop03491	0	0	0	1.41125	0	0
ppyiretrop21570	0	0	9.39501	0	0	0
ppy_retrop18709	0.627854	1.26985	0	0.619993	0	0
ppyiretrop06067	2.77977	1.36706	0	9.05789	1.37275	0.970201
ppy_retrop10738	0	0	0	0	0.573723	7.57056
ppy_retrop10734	1.60116	3.11443	0.895457	1.05356	0.71751	0
ppy_retrom17992	0	0	0	0	0	1.70771
ppy_retrom10418	16.2359	22.0741	55.5259	68.1785	108.51	72.1741
ppyiretrop35993	47.8158	24.7712	62.2897	65.3363	51.1615	44.6562
ppy_retrop16805	0	0	0	0	0	9.52888
ppy_retrom08789	102.811	75.1572	154.025	120.932	143.102	216.717
ppyiretrop10566	2.03775	2.50858	0.981379	2.90328	1.28521	2.77504
ppyiretrop26220	0.756549	1.061	1.23847	0.655538	0.515106	23.8512
ppy_retrom13480	0	0.148115	0	0	0	2.74888
ppy_retrom13489	3.08303	11.5417	0	0	0	0

## Sheet: Macaque
# Supplemental Table S3: Retrocopy expression in macaque
# Expression data are in FPKM; each value corresponds at the median FPKM across all samples from that organ
retro_ID	Brain	Cerebellum	Heart	Kidney	Liver	Testis
mmu_retrom31626	2.17856	0	3.67447	7.07936	3.17782	3.01383
mmu_retrom31624	0	0	0	0	0	1.22017
mmu_retrop18529	13.8386	2.35338	29.0413	4.51313	54.9235	18.838
mmu_retrop35311	3.07323	1.55317	4.29595	3.43775	0	2.73764
mmuiretrom02952	9.99968	0	27.663	15.8117	21.5749	5.34617
mmu_retrop33436	41.992	26.5751	25.2125	33.3878	54.8297	10.7946
mmu_retrom26844	0	0	0	0	0.351642	2.62703
mmu_retrom35196	0.681859	1.69204	0	0	0	0
mmu_retrom35198	2.01944	1.83896	2.31366	4.05356	2.28131	2.87313
mmu_retrom32872	108.587	106.822	498.482	292.487	570.226	123.87
mmuiretrop29349	0	0	0	0	0	1.2725
mmu_retrom06380	0	0	0	0	0	1.60438
mmuiretrom22545	0	0	0	0	0	1.15869
mmu_retrom25553	0	0	0	0	0	3.81643
mmu_retrop39164	0	0	0	0	0	3.66312
mmu_retrop29862	16.8361	14.2559	21.0326	15.6272	17.9248	6.96721
mmuiretrom17777	0	0	0	0	0	4.91706
mmu_retrom23028	4.21477	6.91091	2.1467	1.6206	1.26451	0.561007
mmu_retrom07266	0	0	0	0	0	6.56586
mmu_retrop37288	6.46875	6.98216	5.59597	23.3027	4.4136	16.2048
mmuiretrom31373	2.13124	2.1139	0	0	1.4659	1.8095
mmu_retrop17583	6.15459	0	14.325	0	0	3.5699
mmu_retrom17004	42.364	42.9315	74.22	59.212	168.67	53.9243
mmu_retrom08047	0	0	0	0	0	1.03004
mmu_retrom03097	3.29718	2.99752	2.03193	2.28767	1.65154	1.61992
mmu_retrom03545	0	0	0	0	0	1.00968
mmu_retrop29798	21.9857	16.5497	64.7979	43.0684	108.083	27.0641
mmu_retrop28449	0	0	0	0	0	29.5192
mmu_retrom06308	0	0	0	0	0	1.25206
mmuiretrom19846	18.8095	0	36.3875	0	0	23.7177
mmu_retrom14845	0	0	0	0	0	1.21753
mmu_retrom16572	1.33037	0	0	0	0	0
mmu_retrom15009	0	0	0	0	0	2.37948
mmu_retrop36805	0	0	0	0	0	4.11676
mmu_retrop09577	0	0	0	0	0	1.95947
mmuiretrop22235	184.55	110.604	361.335	231.214	479.953	629.873
mmu_retrom31715	38.1149	30.8907	157.138	73.0054	175.127	8.97826
mmu_retrop35266	0	0	0	0	0	2.44276
mmuiretrop16661	0	0	0	1.63595	1.7802	0
mmuiretrom28458	0	0.269962	0	0	0.860992	7.12635
mmu_retrom26350	0	0	0	0	0	1.07962
mmuiretrop20542	11.4792	10.3113	20.3991	20.6084	25.1838	14.8396
mmu_retrop12106	0	0	0.97645	2.09156	0	0
mmu_retrop16613	0	0	0	0	0	2.07737
mmu_retrop27157	0	0	0	0	0	71.1466
mmu_retrop23386	9.08784	24.4328	15.0841	10.0399	8.58756	4.02352
mmu_retrom22639	0	0	0	0	0	3.08912
mmu_retrop31190	520.597	434.874	1989.66	1152.51	1285.38	525.964
mmu_retrom04843	2.38203	3.12894	6.71204	5.73347	3.16494	6.39336
mmu_retrop33261	2275.22	1971.32	5977.44	1837.11	2710.68	65.6708
mmuiretrop16902	31.3671	14.9525	7.73506	9.75122	12.3942	6.47053
mmu_retrop36552	41.0557	0	0	0	0	51.2388
mmu_retrop06436	10.9644	14.8372	12.8496	10.8416	19.0334	99.3197
mmuiretrom07707	0.395931	1.56579	0	0	0	0
mmu_retrop04146	0.827184	1.35318	1.68474	1.49645	0	0
mmu_retrop17281	7.46408	5.64423	10.5607	11.4638	11.4631	12.5594
mmu_retrop12411	0.35854	0	0	0	0	1.19494
mmu_retrop36715	0	0	0	0	0	1.11208
mmuiretrop35561	0	0	0	0	0	15.962
mmuiretrop09944	0	1.83915	0	0	0	1.28232
mmu_retrop18372	0	0	0	0	0	3.73536
mmuiretrom22499	0.338078	0	0	0	0	2.99585
mmu_retrom27665	7.42987	6.94196	0	0	0	11.292
mmu_retrop32227	2.21492	2.40144	5.45899	1.55246	6.8937	19.1229
mmuiretrom16585	0	0	0	0	0	9.51918
mmu_retrop37874	0	0	0	0	596.822	0.343254
mmu_retrop33407	73.5829	105.61	55.2206	39.3586	28.8752	88.9798
mmuiretrop39733	2.4661	0	14.3639	0	0	5.77279
mmu_retrom25745	151.817	184.039	281.934	161.46	292.72	209.577
mmu_retrop24370	1.13973	0	0	0	0	0
mmu_retrop35078	0	0	0	0	0	5.98169
mmu_retrop14872	0	0	0	0	0	1.86326
mmuiretrop29315	2.31603	0	0	0	0	0
mmu_retrop25541	0	0	0	0	0	2.81624
mmu_retrop33300	11.8065	11.2594	40.1708	76.7813	57.2986	13.1431
mmu_retrop28070	0.262851	0.745959	0	1.83789	1.02716	0.363025
mmu_retrop22732	0	3.15394	0	0	0	0
mmu_retrom23889	1.03024	2.79817	1.19894	77.1203	281.859	0.544065
mmu_retrop38940	7.27067	10.0554	10.1173	17.4532	30.7588	9.82862
mmu_retrom36768	0.132414	0	0	0	0	2.01832
mmu_retrom31238	0	0	0	0	0	3.53401
mmu_retrom37681	3.96	4.81806	5.96633	5.6067	2.20361	5.19183
mmuiretrom13484	0.785239	0	3.70524	0	0	7.69132
mmu_retrom23079	2.6385	2.83904	2.56694	0	0	0
mmu_retrop35182	0.355815	0	1.20529	0	0	0
mmu_retrop06579	21.5691	12.5752	23.6201	22.9595	20.9814	11.4906
mmu_retrom08135	0	0	0	0	122.509	42.6363
mmu_retrom16487	6.31169	5.81509	10.797	5.42619	0	0.425129
mmu_retrom31339	6.61833	8.01997	33.5358	15.4252	36.4598	11.5601
mmu_retrop10060	10.367	8.20714	8.38938	6.84377	10.1072	4.50549
mmu_retrop34134	0	0	0	0	1.2109	0
mmuiretrom23008	0	0	2.90636	1.75203	3.76625	2.19861
mmu_retrom13168	12.1436	11.4926	13.3089	9.49587	4.33038	18.2691
mmu_retrom07504	0	0	0	0	0	6.30841
mmuiretrom31589	17.6713	28.3748	46.9538	45.7487	40.616	17.808
mmu_retrop36006	0	0	0	3.94576	0	0
mmu_retrom32070	0	0	0	0	0	4.20017
mmuiretrop06524	12.7732	13.5241	24.5217	22.6949	30.6694	8.17531
mmu_retrop28337	0.257298	0	0	0	0	1.61916
mmu_retrom11448	0	0	0	0	0	1.18572
mmuiretrom17987	0	0	0	0	0	1.99489
mmu_retrom13350	0.349339	5.68532	5.54787	7.14211	9.86132	0.909484
mmu_retrom14763	0.216044	0	0	0	0	1.90935
mmuiretrom05935	0.50817	0	1.38509	0	1.04479	0.468818
mmu_retrop25194	1.64265	0	0	0	0	0.247475
mmu_retrop17063	8.37595	6.95133	8.82895	6.42719	6.97103	9.28561
mmu_retrom30752	0	0	0	0	0	2.20922
mmuiretrom10228	6.69234	7.80715	26.6476	32.9962	24.8749	3.69859
mmu_retrop17685	0.78596	0.457195	3.35501	3.49229	4.33711	0
mmuiretrom18552	0	0	0	0	0	5.62068
mmu_retrom26581	1.97043	0	7.71209	5.0313	6.14882	23.2962
mmu_retrop33230	0	0	0	0	0	117.842
mmu_retrom09743	0	0	0	0	0	5.73081
mmu_retrom09741	37.9816	24.5504	0	0	25.9301	11.4801
mmu_retrom36985	0	0	0	0	0	5.09383
mmu_retrom20280	0	0	7.40449	0	0	0
mmuiretrom18749	1.07241	1.84155	1.2286	2.54457	2.49925	1.48699
mmu_retrom25823	69.7565	104.774	255.128	161.35	301.896	122.527
mmu_retrop16144	0.285493	0.85494	0	9.40798	0	0
mmu_retrop19530	0	0	0	0	0	2.28049
mmu_retrop35236	0.759742	1.52255	0	0	1.48883	0.346506
mmuiretrom17908	0	0	0	0	0	1.25863
mmu_retrop20187	0	1.59845	0	0	0	0
mmu_retrop36767	0	0	0	0	0	72.2265
mmu_retrop32515	3.09987	3.49514	1.05648	0.979634	0	1.41547
mmu_retrop17370	6.23256	5.88046	16.6978	15.6477	15.2928	0
mmu_retrom25989	7.24374	10.0399	26.6388	19.4556	16.0122	10.9721
mmu_retrom08459	0.215325	0	0	0	0	10.7862
mmu_retrom31642	0.941705	2.97963	0	0	0	0
mmu_retrom17808	575.742	426.281	131.672	85.5655	25.0575	25.5267
mmu_retrop30637	0	0	0	0	0	3.32621
mmuiretrop12468	0	0	0	0	0	58.332
mmuiretrop36242	100.475	52.4547	281.407	127.39	400.176	88.2873
mmu_retrom33141	245.533	53.2508	63.6397	168.277	247.976	94.2543
mmu_retrop25511	0	0	0	0	0	2.60922
mmu_retrop18797	0	0.650173	0	0.690507	0	1.45687
mmu_retrom14385	0	0	0	0	0	7.37325
mmu_retrop26864	1.05213	1.91866	7.54613	2.42918	3.04804	1.28776
mmuiretrom31184	22.1356	22.1335	81.4546	79.1581	48.1298	63.6619
mmu_retrom36753	0.517236	0	0	15.2645	0	0
mmu_retrom32668	1.91669	1.85745	3.64722	2.47869	1.97375	0.873544
mmu_retrom22750	0.416141	0	0	2.60455	0.898739	0
mmu_retrom25906	0	0	0	0	0	362.305
mmu_retrop13686	15.5482	11.484	9.13845	7.40476	5.82209	3.55031
mmuiretrop22323	5.86808	8.22265	3.71892	31.6265	40.6499	0.954391
mmuiretrop22320	3.89669	2.62288	22.1439	17.0217	33.8832	11.4688
mmuiretrom19049	0	0	0	0	0	2.9347
mmu_retrom31347	0	0	0	0	0	8.52051
mmu_retrop10054	0	0	0	0	0	4.9564
mmu_retrom25734	1.47399	3.32572	0	0	0	2.11583
mmu_retrom35276	0	0	0	0	1.40031	0
mmu_retrom32071	0	0	0	0	0	1.45615
mmu_retrop13721	8.7284	8.67227	10.288	7.16565	9.03557	12.1133
mmuiretrom27177	0	0	0	0	264.611	0
mmu_retrop07917	0.950254	1.49841	0	0	0	0.565015
mmuiretrom34527	0	0.334881	0	0	0	83.2981
mmu_retrom38355	0.549008	0	0.339203	0.285435	0	7.0803
mmu_retrom03346	1.89887	2.15978	0.633635	1.50679	0.452487	2.17911
mmuiretrop24400	0.160457	0	0	0	0	1.48794
mmu_retrop12398	1.13957	2.472	3.09164	4.93559	6.49508	7.58552
mmu_retrom23856	2.35984	0.489226	0	0	0	2.99854
mmu_retrop38918	2.96076	5.68208	1.6544	1.40931	3.69742	0
mmu_retrom28756	0	0	0	0	0	2.83621
mmu_retrom24053	2.56231	2.58126	9.10396	10.2481	12.3455	2.71772
mmu_retrop36486	221.254	220.135	554.861	312.263	321.535	36.0475
mmuiretrop13680	0.410455	0.319151	0	0.0913934	0.232992	3.25295
mmu_retrop15068	0.347796	0	0	1.13156	1.02415	0.241447
mmu_retrom25970	8.78423	8.90875	0	1.20521	0	1.7989
mmu_retrom33969	0.35367	0	2.0228	0.803361	0.486352	0.307744
mmu_retrom31540	5.44626	5.74272	4.62984	3.93535	2.15494	2.40256
mmu_retrom23210	0.432487	0	17.9677	0	0	0
mmu_retrop08390	0.447712	2.44292	0	0	0	1.73716
mmu_retrop33791	0	0	0	0	0	4.16316
mmu_retrop24977	20.4403	9.59048	33.5289	62.7954	91.9863	6.67652
mmu_retrop39457	0	0	2.24008	0	0	0
mmu_retrop31620	0	0	0	0	0	2.89088
mmu_retrom13898	1.10111	1.25398	0	0	0	0
mmu_retrom27436	0	0	0	0	0	2.76424
mmu_retrom16594	2.50731	4.04747	7.35739	7.20353	6.50697	4.16839
mmu_retrop05652	0	0	0	0	0	1.45906
mmu_retrop05656	1.82108	3.12014	9.36716	3.99762	42.9532	1.68475
mmu_retrom16837	1.47232	1.13728	3.45961	2.05533	2.13427	1.88413
mmu_retrom31774	0	0	0	0	0	5.24487
mmu_retrom11907	0	0	0	0	6.54519	0
mmu_retrop33699	0	0	0	0	0	1.27586
mmu_retrom26953	0.492148	0	0	0	0	2.13787
mmuiretrop20699	0	0	0	0	0	7.73269
mmu_retrop12128	0	0	0	0	0	1.34487
mmu_retrom30783	0	0	0	0	0	10.2193
mmu_retrop24883	0	3.35117	0	0	0	0
mmu_retrom11374	2.05008	3.59617	12.5963	28.5058	374.415	2.30043
mmu_retrom11375	0.751088	1.27501	0	0	0	0
mmu_retrom16748	0.185343	0	0	0	0	1.95034
mmu_retrop16382	0.432306	0	0	0	1.42646	0
mmuiretrop23282	0.313216	0	0	0	0	139.795
mmu_retrop28758	0	0	0	0	0	1.04863
mmuiretrom27701	1.58656	1.87076	0	0	0	0.699558
mmu_retrom30999	20.5796	24.1565	24.0644	12.7397	23.6329	18.1883
mmu_retrom06202	1.12965	1.64532	2.39146	0.848819	0	0.669678
mmuiretrom27545	0	0	0	0	0	1.81077
mmu_retrop19567	3.93016	5.17917	5.38671	0	0	5.08976
mmu_retrop35124	0.856885	1.39131	2.53029	1.47684	2.59267	59.4209
mmuiretrom33774	0	0	0	0	0	6.16181
mmu_retrop36883	0	0	0	0	0	1.50702
mmuiretrop21543	0	0	0	0	0	358.257
mmu_retrop07924	1.21262	0	0	0	9.70265	5.0319
mmu_retrop38732	0	0	0	0	0	6.94182
mmu_retrom31250	7.7952	10.7886	4.29985	5.86906	7.52101	2.48701
mmu_retrom29875	1.61617	1.16691	1.32531	1.57653	1.29589	1.00139
mmu_retrom14788	12.0834	20.0098	39.1336	46.4426	81.7328	117.358
mmu_retrop32863	0.810664	1.28097	0	0	0	9.81377
mmu_retrom09603	0	0.487433	0	0	0	32.2506
mmu_retrom07298	1.28296	1.62029	1.81977	0	0	4.15713
mmu_retrop28971	0	0	0	0	0	2.20112
mmu_retrop37546	0	0	0	0	0	2.14819
mmu_retrom24277	0	0	0	0	0	8.12869
mmu_retrom28599	0.325842	0.70772	2.1732	2.46573	1.87231	0.280135
mmu_retrop08883	0	0	0	2.45663	7.98651	0
mmu_retrop37081	0	0	0	0	0	2.41754
mmu_retrop18406	0.539044	0.827323	0	1.07067	1.38182	59.3387
mmu_retrop18400	0	0	0	0	0	2.04783
mmu_retrop29625	0	0	0	0	0	2.10735
mmuiretrop07714	66.9717	67.2589	15.3871	38.7643	131.496	69.9934
mmu_retrop35255	0.803042	0	0	0	3.25117	3.1951
mmuiretrom29276	0	0	0	0	0	79.241
mmu_retrom30021	0	1.33204	0	0	0	0
mmuiretrom29339	199.504	225.981	526.805	383.746	575.85	167.959
mmu_retrom09523	3.15154	2.97198	2.74939	2.94692	2.0014	4.67344
mmu_retrom33206	0.530053	0	0	0	0	1.765
mmu_retrom16633	10.034	0	20.3436	22.057	767.801	7.6969
mmuiretrop38783	0.521086	1.29028	0	0	0	0
mmu_retrom14093	0.530716	1.60022	0	0	0	0
mmu_retrop24072	27.7366	24.7018	16.7794	12.6178	12.3806	1.36359
mmuiretrop07301	4.95677	5.35036	63.0882	5.93864	3.57807	11.2305
mmuiretrop05515	74.9328	77.6436	60.2896	50.5136	41.1546	36.7873
mmuiretrop40769	0	1.88084	0	0	0	0
mmu_retrop07777	0	0	10.4539	3.97753	0	1.27545
mmu_retrom09113	1.15443	1.52598	0	0	0	0.391675
mmu_retrom06239	0.722876	0.31926	0	0	0	13.8064
mmu_retrom17545	139.301	154.125	57.5611	59.327	42.8344	83.7732
mmuiretrop28702	0	0	0	0	10.1229	0
mmu_retrop23550	0	0	0	0	0	20.0371
mmu_retrom37504	1.65013	2.3274	1.56636	1.9058	2.02908	2.82932
mmuiretrop24585	0.642356	0	0	0	0	5.22382
mmu_retrom11850	2.59189	5.63666	0.949811	135.337	327.216	0.649161
mmu_retrom23970	0.894723	2.77244	0	0	0	0
mmu_retrop06908	0	0	0	0	0	700.917
mmu_retrom06645	1.36527	1.69383	0.933153	0	0	0
mmu_retrop24621	35.2864	28.6327	41.189	32.5391	31.9536	5.29884
mmu_retrom23341	0	0	0	0	0	1.01865
mmu_retrop32951	0	0	0	0	0	99.59
mmu_retrop32955	0	0	0	0	0	22.4298
mmu_retrom05523	0	0	0	0	0	3.75408
mmu_retrop37430	30.2207	14.0583	42.4372	41.3958	73.0375	14.5624
mmuiretrop10546	0	0	0	0	0	11.5422
mmu_retrom37695	0.13028	0	4.4618	1.12782	1.51201	0.353068
mmu_retrop10339	1.29778	1.96919	2.77512	3.49749	3.0574	2.71184
mmu_retrom07769	1.03212	3.20331	9.77908	6.54862	3.34306	5.57964
mmu_retrom07763	0	0	0	0	0	16.3938
mmu_retrom05409	0	0	0	0	0	156.837
mmu_retrop23620	1.69363	1.29973	0	0	0	0
mmu_retrop22282	34.8395	6.61223	29.0025	34.4987	148.131	17.0936
mmu_retrom17528	0	0	0	0	0	18.0213
mmuiretrom15983	15.2513	15.3076	40.2472	13.9004	38.595	15.7206
mmu_retrom33417	1.40047	2.02505	0.886908	0.721377	0	0.594187
mmu_retrop17547	0	0	0	0	0	2.88487
mmuiretrop25452	7.21295	2.74285	0	0	0	0
mmu_retrop16364	0	0	0	0	0	8.92611
mmu_retrom34686	0	0.484485	0	0	0	60.2869
mmu_retrom32216	2.09824	2.11749	0.484835	0	0	0.615842
mmu_retrop18731	3.65899	4.71896	9.12398	9.10826	9.82484	5.27076
mmu_retrom36449	1.46661	0.960682	0.441873	0.26101	0.319491	43.986
mmu_retrop35547	1.91362	2.57304	3.31318	5.51565	3.61067	7.24868
mmu_retrom22982	0.741675	0	0	0	0	1.71315
mmuiretrop10780	23.7058	17.6426	0	0	0	3.80285
mmu_retrop39359	0.517414	0.468254	0.576676	0	1.42757	0.595113
mmu_retrop31670	0	0	0	19.0101	66.0075	0.966837
mmu_retrop40387	5.51112	0.698662	0.55343	0.604029	0	1.54965
mmuiretrop30551	0	0	0	0	0	41.0406
mmu_retrom23839	14.3103	10.6955	58.2535	61.7437	53.1271	12.6135
mmuiretrop23105	5.11851	4.44505	4.64066	4.2833	2.51292	3.35186
mmu_retrom31286	28.4403	34.1402	79.1845	31.1342	106.215	27.7144
mmu_retrop17936	1.35934	0.628622	2.11764	1.7943	5.04669	1.45827
mmu_retrop30093	5.2569	5.5116	11.769	6.32378	5.28019	25.2967
mmuiretrop03892	0	0	0	0	0	2.12234
mmu_retrop06582	7.6313	1.98022	28.0107	6.5659	53.4316	35.3274
mmu_retrop17018	0.860224	1.78148	1.53496	0	0	0.363291
mmu_retrop18405	228.85	334.418	981.106	586.264	1658.52	254.64
mmu_retrom22588	0	0	0	0	0	2.62795
mmu_retrop19119	79.3434	37.4252	163.871	21.0809	29.1199	10.5631
mmuiretrom18523	0	0	0	0	0	15.6343
mmu_retrop31483	6.22449	3.41917	3.80968	4.71389	13.7223	2.12583
mmu_retrom23238	1.94246	1.39141	0	0.21258	0	0.0801248
mmu_retrop32177	21.222	9.42729	22.2802	17.1079	20.4664	5.72183
mmu_retrop32796	0	0	0	0	0	2.25363
mmu_retrop34249	11.8667	10.443	52.3131	24.3388	38.9372	49.4138
mmu_retrom04059	1.92218	2.65544	1.53458	1.9587	0.371443	3.41614
mmu_retrom12042	2.24402	5.28358	2.45849	3.18913	2.31246	0.633581
mmu_retrom20298	0	0	0	0	0	4.01312
mmu_retrop18470	6.82839	7.81391	4.15108	6.17122	6.20837	3.57847
mmu_retrom22425	2.06078	2.22453	2.0284	1.92662	1.30641	6.97247
mmu_retrop07749	29.7538	4.41869	42.9003	16.3511	216.759	58.0553
mmu_retrop16132	74.7412	105.242	450.433	160.847	233.45	0
mmu_retrom38924	0.644561	0.257295	2.63511	0.441591	0.439687	0.96408
mmu_retrop39680	0	0	0	0	0	1.21582
mmu_retrom17233	2.73611	2.88012	5.3959	4.1727	2.8141	3.16944
mmu_retrom17235	7.24776	8.38381	66.3851	50.0881	96.0807	13.6722
mmuiretrom22180	0	0	0	0	0	2.08135
mmu_retrop05999	2.53866	2.61802	1.80816	1.48944	0	3.19756
mmuiretrom29366	239.79	154.736	1460.68	326.09	358.693	32.9771
mmu_retrom05283	1.86859	3.07827	2.22359	2.04905	1.24897	2.08537
mmu_retrop30690	0	0	0	0	1.44097	2.22581
mmu_retrom38064	0.234544	0	0	0	0.71478	5.06303
mmu_retrom35574	0	0.552295	0	0	0	82.2262
mmu_retrop09478	6.91523	8.49608	5.08781	7.75758	7.90045	1.80932
mmu_retrom23102	0.565157	0	1.2501	1.25926	0	0.404734
mmuiretrom06556	15.4217	0	0	18.0117	0	7.32601
mmu_retrom17069	1.96619	2.03333	10.5298	11.8656	6.57177	1.86302
mmu_retrop29917	0	0	0	0	0	1.21329
mmu_retrom38977	4.75461	2.75999	4.40911	1.69116	9.0274	2.32378
mmuiretrom25766	52.2626	23.165	84.043	38.6657	175.396	45.7304
mmuiretrom27722	14.0059	10.2912	15.2122	11.9654	8.73785	3.12914
mmuiretrom13524	0	0	0	0	0	22.3762
mmu_retrop11779	360.013	239.836	124.185	45.0802	48.1887	6.92261
mmu_retrop28858	1.44847	2.20354	2.40123	1.90108	0	0.649368
mmu_retrop18339	2.41231	7.80999	0	0	0	3.55125
mmu_retrop17679	0	0	0	0	2.47879	0.569474
mmu_retrom32458	0.253178	0.3517	0	4.94284	3.11231	44.5635
mmuiretrop12011	0	0	0	0	0	1.32492
mmu_retrom11809	0	0	0	0	0	83.3146
mmu_retrop17535	1.06338	0.271581	1.1026	0	0	0.315368
mmu_retrom25709	1.84814	1.18974	2.34307	1.16837	0	102.351
mmu_retrom26542	1.71523	0	0	0	0	0
mmuiretrom06988	1.06215	0.437148	3.07741	2.44449	3.69696	10.507
mmu_retrom38106	0.596112	1.05547	0	0	0	0.322382
mmu_retrop09229	0	0	4.05547	0	0	2.52397
mmu_retrop24985	114.369	64.3391	28.4014	144.899	253.115	72.9573
mmu_retrom28576	0	0	0	0	0	66.9824
mmuiretrom08811	21.2973	19.11	5.21857	23.1496	8.62595	41.5344
mmu_retrom23598	7.49012	7.33226	9.02278	0	0	0.247181
mmu_retrop36495	33.1345	34.4653	13.275	14.2993	9.76244	24.0056
mmu_retrom04971	0	0	0	0	0	2.5277
mmu_retrom09623	8.73738	12.5925	27.5787	27.3855	84.2766	14.1458
mmuiretrop29099	0	0	0	0	0	4.55726
mmu_retrop25669	0	0	0	0	0	1.61584
mmuiretrop13321	0.746033	1.11675	0	0	0	0
mmuiretrom08138	0	0	0	0.727669	0	1.50032
mmuiretrop05287	1.20068	1.34424	2.35699	2.55049	1.0887	2.27577
mmu_retrom14125	1.12954	1.65073	0	1.51802	5.43473	0.476955
mmu_retrop10220	0	0	0	0	0	1.26852
mmu_retrop18428	4.11401	1.91805	7.78714	2.99413	2.53523	3.34822
mmu_retrom21111	0.53125	1.7539	2.35149	6.13452	5.37703	0.489018
mmu_retrop36525	0	0	0	0	0	12.1514
mmu_retrop30866	0	0	0	0	0	4.35513
mmu_retrop16818	0	0	0	0	0	8.53505
mmu_retrom35087	0.226869	0.5023	0	0	1.06057	0.689119
mmu_retrom30567	0	0	0	0	0	3.74722
mmu_retrop16101	0.645273	0.302217	6.43699	0	26.2465	0.338547
mmu_retrop17473	0.119781	0.334517	0.307984	0	0	1.85846
mmu_retrom06297	1.31556	1.6685	2.50509	3.15162	11.6776	1.1308
mmuiretrop08757	1.66703	0	0	0	0	0
mmu_retrop09346	1.0736	0	4.71924	5.77876	0	30.5947
mmu_retrom06701	0	0	0	0	0	3.12982
mmu_retrom35546	0.804963	0	2.47798	2.02243	3.20896	1.01349
mmu_retrop18811	0.847254	3.22561	0	4.09032	0	2.14048
mmu_retrop38007	0	0	0	1.16807	0	0
mmu_retrom16650	1.25078	3.33813	15.7863	11.3115	19.5913	3.79421
mmu_retrop35896	0	0	0	0	0	13.8477
mmu_retrop13872	32.0384	17.2336	144.466	50.9475	126.177	28.0981
mmuiretrop05436	1.20333	0.817308	0	1.86985	0	0
mmu_retrom30456	24.5163	19.4291	22.0683	26.2907	37.2312	85.1539
mmuiretrom30172	4.41694	4.46897	6.60427	6.77295	7.65661	3.52431
mmu_retrom22451	0	0	0	0	0	22.817
mmu_retrom24119	0	0	0	0	0	2.10174
mmu_retrop37616	0	0	0	0	0	2.04608
mmu_retrop13476	15.4282	12.8293	9.71742	12.4429	9.08977	5.29201
mmu_retrop39524	0	0	0	0	0	8.13108
mmu_retrom31060	0	0	0	0	0	6.74664
mmu_retrom31065	23.8658	31.1484	34.9685	23.3167	20.8205	25.6519
mmu_retrop36728	0	0	0	0	0	5.77387
mmuiretrop06664	11.1295	9.54574	15.3551	18.1392	37.6586	16.849
mmuiretrom02696	1.09708	0.517453	0.683812	0	0	0.449464
mmu_retrom05467	0	0	0	0	0	450.896
mmu_retrom34272	15.1049	11.3228	21.0861	20.6183	42.0012	10.2323
mmu_retrom22740	0	0	0	0	0	1.05888
mmuiretrom06527	0	0	0	0	0	7.66436
mmuiretrom19057	0	0	0	0	0	3.64927
mmu_retrom26863	0	0	0	0	0	5.13663
mmu_retrop08211	1.07762	0.70591	0	0.745823	0	0.570858
mmuiretrop31517	40.6644	49.4915	150.815	97.9025	216.029	28.6794
mmuiretrom32989	0.964524	0.455281	0	1.16176	0	0
mmu_retrom16364	0.211457	0	0	0	0	19.8898
mmu_retrop09213	0	0	0	0	0	2.51729
mmu_retrom33109	0	0	0	0	0	1.06664
mmu_retrom32275	2.27031	3.72178	0	0	0	2.90887
mmu_retrop26607	2.5503	2.39755	0	0	0	5.54657
mmuiretrom12626	41.9944	31.003	311.309	117.373	474.37	36.8364
mmu_retrom14616	0.505497	0.838533	0.527467	0.504253	0.253682	4.59846
mmu_retrom16753	0.117284	0	0	0	0	4.7196
mmu_retrom04453	6.49449	6.31192	6.71149	3.81034	19.1463	15.0169
mmu_retrop29840	6.86468	7.39556	10.37	11.5542	19.5329	7.71802
mmu_retrom34556	0	0	0	0	0	3.17254
mmu_retrop18073	31.6421	46.4852	70.0426	64.3971	102.758	23.3912
mmu_retrop17950	0	0	0	0	0	1.34987
mmuiretrom30568	0.090315	0	0	1.64181	0	0
mmu_retrom25945	0	0	0	0	0	2.80453
mmu_retrom37943	11.6018	12.0427	27.9236	20.6424	10.8951	9.05728
mmu_retrop34845	0.238823	0	0	0	0	1.13667
mmuiretrop12908	2.62343	6.08883	19.372	20.5266	13.1491	10.6749
mmuiretrom07436	12.6605	12.6682	13.6793	54.0356	255.131	6.41728
mmu_retrop18481	63.3338	52.2071	28.7492	30.5679	22.5998	8.12759
mmu_retrom32423	3.3903	0	0	0	0	0
mmu_retrom31871	0	0	0	0	0	1.0565
mmu_retrom31878	432.53	367.717	782.962	342.475	486.209	1017.92
mmuiretrom02931	8.71029	0	24.4026	11.2077	0	8.55581
mmu_retrom10217	6.7585	8.21104	7.22287	7.50902	5.81988	5.98452
mmu_retrom11625	41.9433	35.1638	33.9696	29.6172	26.2945	17.7013
mmu_retrom20589	2.94408	2.41287	5.12813	3.57981	2.52535	7.75472
mmu_retrom26516	2.40563	0	11.5948	0	0	0
mmu_retrom08846	0.440471	0	0	0	0	1.5375
mmu_retrop15725	6.95516	6.85944	14.2774	10.2599	35.3806	3.95515
mmu_retrom07094	0	0	0	0	0	2.93821
mmu_retrop36036	2.32614	1.43319	2.43905	2.0943	3.17009	3.33088
mmu_retrop23824	196.478	197.136	225.666	337.929	422.945	751.097
mmuiretrop03712	0.178751	0	0	0	0	1.91728
mmu_retrom06090	1.24699	0.830305	1.57079	1.49077	0.793236	1.15628
mmu_retrom30557	1.41964	0	0.743223	0	0	0.371028
mmu_retrom05849	51.6666	68.3201	247.189	134.744	369.027	64.8974
mmu_retrom32048	0	0.916919	0	0	0	11.1227
mmu_retrop31034	0	0	0	0	0	2.04596
mmu_retrop05759	1.33169	4.60968	10.184	9.85239	16.1804	2.49375
mmu_retrom26915	0	0	0	0	0	5.82365
mmuiretrom35560	6.19258	5.14687	7.07974	4.82778	4.90792	2.5004
mmu_retrom24287	0	0	4.56565	0	0	0
mmu_retrom03815	1.33954	1.37102	0.632542	1.33669	0.891939	1.3034
mmu_retrom06361	0.259369	0	0	0	0	12.7974
mmu_retrom06942	3.82334	4.42745	9.72857	9.75308	11.7147	4.51934
mmuiretrop06956	0	0	0	0	0	178.241
mmu_retrom27382	0	0	0	0	0	2.42326
mmu_retrop40409	0	0	0	0	0	1.28229
mmuiretrop26958	4.32279	2.53737	8.05497	4.91476	13.4156	5.59019
mmu_retrop17409	10.0804	0	13.7054	6.71327	0	12.5751
mmu_retrop38743	3.36482	0	0	0	5.91798	3.44377
mmuiretrop07106	2.68144	2.2897	1.15187	2.3724	0	2.87933
mmu_retrop32245	1.72087	1.4795	1.7186	0	0	0
mmu_retrom20968	0.675317	0.753075	0	0	0	20.9201
mmu_retrop09860	0	0	0	0	0	52.2558
mmuiretrop31704	5.4237	4.80083	25.1018	0	27.4817	0
mmu_retrom38046	0	0	0	0	0	7.12041
mmu_retrop09456	0	0	0	0	0	1.37302
mmu_retrop23548	0.815641	0.806642	1.12476	0.860277	1.24927	1.64688
mmu_retrop18596	0	0	0	0	0	249.031
mmu_retrop23959	8.15265	8.17341	1.51108	2.34727	1.65984	0.350341
mmu_retrom26329	1.94736	1.48917	1.52494	1.51137	0	5.08122
mmu_retrop24354	0	0	0	0	0	56.9309
mmu_retrop14853	0	0	0	0	0	2.30483
mmu_retrop15899	0	0	0	0	0	3.30692
mmu_retrom33156	0	0	0	0	0	1.11131
mmu_retrom10392	13.1143	10.2461	21.0814	10.0581	8.63227	1.13597
mmu_retrop30187	0	0	0	0	0	2.41371
mmu_retrom28560	0	0	0	0	0	1.90652
mmu_retrom10637	0	0	0	0	0	390.899
mmu_retrom22976	9.31236	4.58156	0	0	0	6.98164
mmu_retrop30166	1.08426	1.88663	0	0	0	1.28289
mmu_retrom36964	84.2328	105.382	249.697	218.019	267.269	50.1161
mmuiretrop20924	0.414966	0.424183	0	0.256806	0	4.07898
mmu_retrom34708	0	7.12863	0	0	0	0
mmu_retrom13805	0	1.05055	0	3.6845	0	0
mmuiretrop05690	0	0	0	0	0	1.15832
mmu_retrom31989	3.0331	2.42684	7.09328	0	8.50746	2.29997
mmu_retrom32676	0	0	0	0	0	32.3362
mmu_retrop34876	2.02087	2.07155	0	5.05972	0	0
mmu_retrop34875	0.880356	1.58402	0	0	0	1.0574
mmu_retrop37749	2.58479	1.86395	0	0	0	0.219868
mmu_retrop16057	0	0	0	0	0	130.51
mmu_retrop24263	0	0	0	0	0	3.15713
mmu_retrop27184	6.86533	5.45961	1.9491	0	0	0.252654
mmu_retrop27180	8.11179	5.80963	2.34265	1.52149	0.814731	0.941599
mmu_retrom37377	0.154105	0	0	0	0	4.77638
mmu_retrom10286	0.528982	0.705049	2.54608	3.89705	6.01149	0.444747
mmu_retrop23557	0	0	0	0	0	5.36985
mmu_retrop28299	43.3419	54.029	53.1537	47.7107	34.8456	55.5394
mmuiretrom20599	99.9418	82.7548	176.117	117.845	164.712	36.2466
mmu_retrop09242	0.258863	0.275154	0.441684	0.514046	0.60203	21.3905
mmu_retrom32204	0.727083	0.906088	1.37706	0.752512	0.563899	0.0795072
mmu_retrop36393	298.538	113.136	68.1134	29.0174	42.0638	7.79605
mmu_retrop23850	0	0	0	0	0	27.6799
mmuiretrop15486	0	0	0	0	0	1.29358
mmuiretrop23474	1.57856	1.18561	0	2.85346	0	0.845394
mmu_retrop09919	0	0	0	0	0	1.36566
mmuiretrom32552	4.5396	1.39282	0	2.86065	0	1.06661
mmuiretrom07822	5.09271	6.35916	14.3201	8.91048	7.78919	3.9887
mmu_retrop12679	0	0	0	0	0	1.87884
mmu_retrop28310	10.7635	8.85983	11.6645	17.1939	10.2571	3.62117
mmu_retrop28155	0	0	0	0	0	1.08299
mmu_retrom37043	0.662089	0	0	0	0	3.40495
mmu_retrom33972	0.531595	0.684557	0	0	0	2.79042
mmu_retrom21300	0.076256	0	0	0	0	6.25825
mmu_retrom22578	0	0	0	0	0	2.19308
mmu_retrom10527	27.8956	35.0791	37.2637	30.1956	19.1423	21.4132
mmu_retrop32167	13.1101	7.21757	0	0	0	37.5662
mmu_retrop16318	3.30809	3.22448	3.17638	1.94778	0.845934	8.99538
mmu_retrom32280	0	10.1729	0	0	0	0
mmuiretrop27789	0	0	0	0	0	2.53235
mmu_retrom31160	0.856713	0	2.3684	0	0	0
mmuiretrop20722	7.34603	4.8515	0	5.81848	3.18871	4.35165
mmu_retrop26955	1.49759	3.05549	0	0	0	0.447231
mmu_retrom08601	2.24722	2.80533	0	1.79952	0	0.81602
mmuiretrom21810	5.62356	8.3965	18.0351	0	21.3983	4.79875
mmu_retrom29200	19.3546	18.9881	0	0	0	5.01155
mmuiretrom20493	3.24029	4.2353	0	0	0	0
mmu_retrop30022	6.09015	2.99219	8.05356	3.11176	0	188.001
mmu_retrop39543	0	0	0	0	0	75.5463
mmu_retrom26964	2.6213	0	0	0	0	0
mmu_retrop24513	0.889032	0.784745	0	0	0	1.54798
mmu_retrop38801	2.00363	5.34792	6.94829	13.0976	6.5099	1.89981
mmuiretrom22998	0	0	0	0	0	1.32662
mmu_retrop06943	1.12302	1.25039	3.60886	5.18867	17.6446	1.1668
mmu_retrom36926	1.13368	0.681244	0.816977	0.414926	0	0.849594
mmu_retrop19794	0	0	0	0	0	3.46827
mmu_retrop34989	0.78794	0.788169	1.17711	1.55072	0.481597	0.62283
mmu_retrom16059	0	0	2.6153	0	0	1.37188
mmu_retrom10646	0.892432	0	0.980236	0.727896	1.65392	9.8873
mmu_retrop08533	1.56583	0	3.12633	0	0	2.70004
mmu_retrop32916	0.552786	0.72634	0	0.668713	0	5.09842
mmuiretrop05645	19.59	19.1745	10.5064	7.45266	13.5629	56.9047
mmu_retrop07672	0	0	0	0	0	1.37589
mmu_retrom16962	2.21176	4.6122	7.39755	8.35302	17.2508	18.7278

## Sheet: Mouse
# Supplemental Table S3: Retrocopy expression in mouse
# Expression data are in FPKM; each value corresponds at the median FPKM across all samples from that organ
retro_ID	Brain	Cerebellum	Heart	Kidney	Liver	Testis
mus_retrom123890	0	0	0	0	0	1.36176
musiretrom01651	0	0	0	0	0	8.61381
mus_retrop93339	5.1775	2.7468	0	0	7.08494	5.62353
mus_retrom100950	0	0	0	0	0	1.31832
mus_retrom123369	0.427872	0.242208	0.202845	0.297707	0	2.18214
mus_retrom50556	0.477729	2.18914	1.41888	0	0	0
mus_retrom40704	0	0.057424	0	0	0	10.9422
mus_retrom68722	17.6141	19.1528	0.25862	0	0	0
mus_retrom66280	0	0.763893	2.0408	0	0	0
mus_retrop51942	0	0	0	0	0	206.755
mus_retrom63020	0	0	0	0	0	9.705
mus_retrop113816	1.22834	0.558579	2.92805	1.34432	3.44151	1.62086
mus_retrom42086	0	0	0	0	0	11.3094
mus_retrom42080	0	0	0	0.532886	1.19806	0
mus_retrop71221	0	0.202377	0	0.210805	0.315807	291.814
musiretrop37452	0.103824	0.147334	0	0	0	1.91406
mus_retrop45643	0	0	0	0	0	341.454
mus_retrom100745	0	0	0	0	0	1.28564
mus_retrop92578	0	0	0	0	0.88034	154.456
mus_retrop55007	17.34	20.6228	8.66463	8.65453	10.0536	3.69797
mus_retrop101020	0	0	0	0	0	49.6216
mus_retrop113304	148.058	134.786	166.077	39.4925	14.0576	383.889
mus_retrop70265	0	0	0	0	0	2.38415
mus_retrop44762	0	0.491473	1.10072	0.818014	2.06992	0.871963
mus_retrop114307	6.89184	4.58878	14.7458	7.97802	4.386	100.793
mus_retrop91832	0	0	0	0	0	91.6784
mus_retrop79653	11.4519	10.1195	16.993	9.21308	15.1141	103.746
mus_retrop100234	0	0	1.13687	0	0	0
mus_retrom58620	0	0.824856	0	2.88055	0	0
mus_retrop65784	0	0	0	0	0	1.01715
mus_retrom69060	0	0	0	0	0	1.3286
musiretrom28650	0	0	0	0	0	2.9979
mus_retrom106866	0	0	1.41262	0	0	0
mus_retrop48516	0.429229	0.527425	0	0	0	11.1532
mus_retrom96741	0	0	0	0	7.60327	0
mus_retrom96889	0	0	0	0	0	5.43428
mus_retrop65595	0	0	0	0	0	58.9641
mus_retrom90513	0	0	0	0	0	84.9417
mus_retrom43546	0	0	0	0	0	505.691
mus_retrop49028	2.22757	2.43373	0	0	0.210316	0
mus_retrop44896	1.89916	0.868897	5.08579	3.72955	9.36022	3.77937
musiretrom36000	0	0	0	0	0	1.03411
mus_retrop54426	0	0	0	0	0	4.73817
mus_retrop48947	13.0821	12.7627	12.2514	27.4255	21.9064	5.515
mus_retrop93743	2.1252	0.544298	6.38991	0.3626	39.1632	5.93564
mus_retrop112996	0	0	0	0	0	7.26929
mus_retrom97507	227.498	196.652	77.7878	26.4069	49.1378	6.5443
mus_retrom42758	1.43257	1.03983	1.84974	3.347	0.162407	0.337779
mus_retrom46277	0	0	0	0	0	2.34318
mus_retrom90946	0.728637	0.64734	1.50125	0.880296	0.627879	0
mus_retrop47110	0	0	0	0	0	2.40545
mus_retrop79467	0	0	0	0	0	3.15348
musiretrop34975	0	0	0	0	0	9.71614
mus_retrop70610	0	0	0	0	0	2.11762
mus_retrom50460	0	0	0	0	0	278.81
mus_retrom100047	1.17553	1.60128	1.30622	1.1604	1.17242	0.954571
mus_retrom69486	0	0	0	0	0	1.50096
mus_retrom50669	0	0	3.55	0	0	3.85859
mus_retrop74490	0	0	0	0	0	1.70818
mus_retrop73440	0	0	0	0	0	98.659
mus_retrop102165	2.84612	1.41272	0	0.196742	0	0.489231
mus_retrom38162	1.28049	0.858781	0	1.77246	0	0
mus_retrom98128	0	0	0	0	0	2.10183
mus_retrom98121	0	0	0	0	0	1.66108
musiretrom41190	0.51747	0	0	0	0	3.90129
mus_retrom98017	0	0	0	0	3.42225	0.408544
mus_retrop58367	3.34679	1.48046	12.7399	1.0894	0.202515	0
mus_retrom69527	0	0	0	0	0	101.894
mus_retrom58817	0	1.52664	4.78807	3.12323	0	0
mus_retrom97891	0	0	0	0	0	129.228
mus_retrom68920	0	0	0	6.53052	0	0.973509
mus_retrom43775	0	0	0	0	0	325.785
mus_retrom69408	0	0	0	0	0	8.50425
mus_retrom72807	0	0	0	0	0	3.58954
mus_retrop98666	0	0	0	0	0	51.1307
mus_retrop93365	0	0	0	0	0	375.055
musiretrom35383	0	0	0	0	0	3.72387
mus_retrom46694	0	0	0	0	0	4.02913
mus_retrom43922	0	0	0	0	0	132.079
mus_retrop98169	8.16607	4.02053	0.881744	0.448015	0	0
musiretrom15952	7.77493	4.38732	5.34094	2.50015	2.49802	3.64396
mus_retrom58893	0.0667137	0	0	0.105289	0	1.31551
mus_retrop53855	0	0	0	0	0	100.842
musiretrop31812	0	0	0	0	0	2.68053
mus_retrom50287	0	0.533647	0	0	1.97328	0
mus_retrom79426	0	0	0	0	0	42.5129
mus_retrop48834	0	0	0	0	0	2.58866
mus_retrom73131	10.398	6.70941	2.0457	2.91171	1.76608	8.16651
mus_retrop73113	0	0	0	1.72868	0	0
mus_retrop79355	0.361781	0.378514	0	0	0	63.4319
mus_retrom108053	0	0.170059	0	0	0	14.4579
mus_retrop100263	1.60259	0.856403	0	0	0	0.680655
musiretrop37999	5.51703	4.15631	1.81913	3.76976	2.37257	30.2579
mus_retrom125095	2.23917	3.47157	2.94183	1.52517	0.520133	0.492806
mus_retrop46040	8.87365	7.52599	13.711	15.3967	14.7931	26.2855
mus_retrom124055	0	0	0	0	0	1.1638
mus_retrop96190	0	0	0	0	0	6.81582
mus_retrop52552	0	0	0	0.208402	2.0934	0
mus_retrop50305	0.10975	0	0	0	0	2.16708
mus_retrom69328	0.635133	0.621264	1.35338	0	0.756498	0
mus_retrom42065	0.125059	0.265569	0	0.255302	0.262216	386.567
mus_retrom45861	0	0	0	0	0	1.3227
musiretrop24940	6.49349	6.7321	14.4271	18.3295	27.0312	46.5292
mus_retrom121805	0	0	0	0	0	3.04158
mus_retrop65764	0	0	0	0	0	7.34172
mus_retrop65763	0	0	0	0	0	129.492
mus_retrop110694	0	0	0	0	0	1.16471
mus_retrop112711	0	0	0	0	0	1.36268
mus_retrom125011	1.53368	1.77566	2.29039	1.11486	0.39636	1.8518
mus_retrop53075	0.329088	0.197648	0	0	0	1.31485
mus_retrom62633	0	0	1.36291	0	0	0.675689
mus_retrom106418	0	0	0	0	0	2.02626
mus_retrop70565	0	0	0	1.9029	3.49445	0
musiretrom22866	0	0	0	16.2633	0	0
mus_retrom50572	0	0.243073	0	15.1997	15.5927	0
mus_retrom103643	0	0	0	0	0	9.79355
mus_retrop45787	0.209692	0.468854	0	0.249728	0	2.0007
mus_retrop44438	0	0	1.01949	0	0	0
mus_retrop74359	0	0	0	0	0	4.65192
mus_retrop97126	0.60061	0.65962	4.15981	3.37855	7.21103	0.265584
musiretrom21215	1.69778	1.23329	1.87145	1.72761	57.7302	1.30047
mus_retrop92162	2.16717	0	0	0	0	0
mus_retrop59824	0	0.445684	3.13471	1.06525	0.770361	0
mus_retrom62921	0	0	0	0	0	2.74738
mus_retrom96493	0	0	0	0	0	2.03379
mus_retrom69830	0.381413	0	0.212318	0	0.450518	933.616
musiretrop01983	0	0	0	0	0	1.61509
musiretrop01980	0	0	0	0	0	1.97385
mus_retrop101532	0	0	0	0	0	15.5473
mus_retrom122983	0	0	0	0	7.19875	51.0421
mus_retrop89795	0	0	0	0	0	17.7708
mus_retrom100099	0	0	0	0	0	299.826
mus_retrop49046	0	0	0	0	0	5.9381
mus_retrop49814	0	0	0	0	0	3.4029
mus_retrom97643	0.0931012	0.098721	0	0	0	103.296
mus_retrop100933	0	0	0	0	0	2.41131
mus_retrom80325	0	0	0	0	0	91.0938
mus_retrom48647	0	0	0	0	0	11.2779
mus_retrom80307	0	0	0	1.32076	0	0
mus_retrom72520	3.83837	3.04499	2.22661	1.96435	2.42859	2.60632
mus_retrom80040	1.06648	0	0	0	0	0
mus_retrom59418	0	0	1.42646	0	0	0
musiretrom41448	0.456046	0	0	0	0	1.64332
mus_retrop66231	0	0.373725	0	0	0	1.02593
musiretrop22468	0.462695	0.662648	0.558668	0.494366	1.31587	2.55223
mus_retrom46295	1.44932	2.38655	0	0	0	1.37995
mus_retrom48384	0	0	0	0	0	5.80252
mus_retrom69040	0	0	0	0	0	1.32298
mus_retrop48572	0	0	1.21574	0	0	0
mus_retrop78757	0	0	0	0	0	9.95068
mus_retrom91238	0	0	0	0	0	2.20665
mus_retrop58257	403.95	313.358	719.884	203.54	751.204	593.397
mus_retrop69581	0	0	0	0	0	7.41582
mus_retrop45870	0	0	0	0	0	268.845
mus_retrom69970	0	0	0	0	0	88.4421
mus_retrop114296	0	0	1.10527	1.18473	1.01564	1.72981
musiretrom34407	0	3.87848	0	0	0	0
mus_retrom90885	0	0	0	0	0	4.1971
mus_retrom42194	0	0	0	0	0	132.683
mus_retrop52568	3.3928	0.374096	2.60279	2.04152	1.83431	9.32696
mus_retrom103568	0	0	0	0	0	33.662
musiretrop34558	9.36622	7.26567	0	0	0	0
musiretrom12912	0	0	0	0	1.46004	0
mus_retrom47016	0	0	2.13292	0.674466	0.700967	0
mus_retrop76105	0	0.591518	0.896884	1.04327	3.31867	0.980357
mus_retrom72410	0	0	0	0	0	5.28531
mus_retrom65810	0.349562	0.509021	0.19529	0.360537	0.182283	15.6728
musiretrom01640	0	0	0	0	0	1.74551
mus_retrop114215	0	0	0	2.37111	11.9238	0
mus_retrop101671	0	0	0	0	0	1.23951
mus_retrop58124	0.214378	0.19115	0	0	0	1.61559
mus_retrop94036	0	1.13157	2.04042	0	0	0
mus_retrom66621	0	0	0	0.231087	1.80796	0
mus_retrop73543	19.9033	11.7525	5.33671	6.70822	6.91773	5.14938
mus_retrom46431	0	0	0	0	0	1.1544
mus_retrop87352	1.07159	0.250708	1.53249	0.866825	0.678251	0
mus_retrop74329	1.21816	1.1427	0.603467	0.917259	0.373834	1.9795
mus_retrom98840	0	0	0.161396	0	0	45.1767
mus_retrom69093	0	0	0	0	0	4.70556
mus_retrom105261	10.5564	4.96737	1.28403	1.0855	1.39827	1.43343
mus_retrop101970	44.5698	32.979	8.8213	7.94965	5.14262	3.84816
mus_retrop112296	9.22746	8.10148	8.10481	9.12109	6.37829	41.3729
mus_retrop95965	0	0	0	0	0	10.7392
mus_retrom97091	0	0	0	0	0	1.24938
mus_retrop69629	0	0	0	0	0	5.11844
mus_retrop92564	0	0	0	0	0	70.6041
musiretrom03954	0	0	0	0	0	120.18
mus_retrop70539	9.48258	9.5728	9.45252	13.0641	14.2106	10.8878
mus_retrom66136	0	0	0	0	0	1.16173
mus_retrop104198	5.46319	6.61436	7.97747	10.1694	6.19524	2.20636
mus_retrop100947	0	0	0	0	2.18345	0
mus_retrop69399	1.35418	2.3187	4.04983	3.28265	3.84314	1.39033
mus_retrom49232	3.62115	0	0	4.33977	4.16115	356.771
musiretrop33087	2.10893	2.64913	2.2995	3.28328	4.56958	0.606373
mus_retrom124477	0.281876	0.298845	0	0.494139	0.660502	301.61
mus_retrop101198	0	0	0	0	0	1.16282
mus_retrom99232	0	0	0	0	0	1.06768
mus_retrom69014	2.12163	0.503985	1.77983	1.616	0	0.384124
mus_retrop54112	10.0703	9.35302	10.3972	18.48	20.9	6.85649
mus_retrom66895	0	0.347424	1.34585	0.76689	2.97715	0
mus_retrop46022	0	0.42421	0	0	0	3.36729
mus_retrom96093	0.195672	0.155807	0.210379	0.377249	0.447147	4.64268
mus_retrop113049	0	0	1.09662	0	0	2.57603
mus_retrom107434	7.33461	8.86844	0	0	0	0.254983
mus_retrom59169	0.508362	0.426995	1.92432	1.04607	1.49335	0
mus_retrom42748	1.58265	1.12622	2.23738	6.66737	6.10407	3.23109
musiretrop40316	1.9954	1.40957	0.266403	0.207114	1.35883	6.96661
mus_retrom79842	0	0	0	0	0	2.86784
mus_retrom95856	0	0	0	0	0	5.5923
musiretrop12558	0.750783	0	0	0	1.11456	2923.36
mus_retrom97984	0	0	0	0	0	17.554
mus_retrop95424	0	0	0	0	0	1.39105
musiretrop42304	1.67746	1.54647	1.64003	1.78426	3.0662	2.40847
mus_retrom43877	0.656656	1.03468	1.94362	1.89622	3.349	1.22012
mus_retrop98507	0	0	0	0	0	29.5988
musiretrom38462	2.41315	2.45556	0	1.94735	0	9.97604
mus_retrop96033	0	0	0	0	0	1.91059
mus_retrop56403	0	0	0	0	0	1.51889
mus_retrom102194	1.43319	0.871411	0	0.397073	0	0
mus_retrom106245	0	0	0	0	0	7.9533
musiretrom36849	65.8184	44.0884	23.8404	23.7264	46.5272	13.2664
mus_retrop100454	0.599651	0	0.383203	2.50892	1.72348	0
mus_retrom73305	0	0	0	0	0	11.512
mus_retrom49633	69.5069	39.3392	67.2424	21.1664	11.9899	6.59367
mus_retrom65981	0	0	0	0	0	3.15546
mus_retrop47027	3.35451	2.43573	4.12668	0.84692	0.757431	353.601
mus_retrop95957	0	0	0	0	0	2.278
mus_retrom123526	0	0.322174	1.79549	0	0	0.24391
mus_retrom69436	0	0	0	0	0	2.4911
mus_retrop98672	0	0	0	0	0	16.9348
mus_retrom106435	0	0	0	0	0	1.30925
mus_retrom50516	0	2.59614	2.46563	4.05568	1.40203	0
mus_retrom79661	61.1492	60.0884	76.3367	89.0096	100.455	58.188
mus_retrop42196	0	0	0	0	0	20.6562
mus_retrop48457	0	0	0	0	0	2.00486
mus_retrom66654	0.602144	0.852338	0.939058	0.526711	0.403139	1.07399
mus_retrop104327	0	0	0	0	0	112.795
mus_retrop73537	0	0	0	0.0523449	2.59823	0
mus_retrom46464	0	0	0	0	0	1.90449
mus_retrop76052	0	0	0	0	0	124.078
mus_retrom125188	0	0	0	0.154962	1.03945	0
mus_retrom123929	0	0	0	0	0	209.134
mus_retrop54782	0	0	0	0	1.2964	0
mus_retrom97471	0	0	0	10.5632	0	0
mus_retrom95429	0	0	0	0	0	3.84119
mus_retrop103919	1.16871	0.348754	0.392195	2.04375	3.30076	2.26291
mus_retrom97130	0	0	0	0	1.19553	0
mus_retrop51853	0	0	0	0	3.08864	0
mus_retrop44918	0	0.0314537	0	0	0	1.01226
musiretrop03405	11.3709	11.0298	8.01397	15.7393	30.7308	19.7941
mus_retrop70222	0	0	0	0	0	10.1017
mus_retrom70053	0	0	0	0	0	63.75
mus_retrom72028	0	0.372153	0	0.238956	4.93642	0
mus_retrop79610	0.0888175	0	0	0	0	29.7389
mus_retrop114141	0	0	0	0	2.16911	2.60979
mus_retrop100895	8.1799	6.10953	0.321118	0.726754	0.183354	2.51204
mus_retrop52130	0	0	0	0	0	5.64423
mus_retrom46702	0	0	0	0.923071	0	2.15676
mus_retrom42415	0	0	0	0	1.01919	0.829598
mus_retrop44349	0	0	0	0	0	25.9988
musiretrom28553	0	0	0	0	0	12.5753
mus_retrom109227	0	0	0.448547	0.689542	1.30508	0
mus_retrop48690	0	0	0	0	0	18.639
mus_retrop91705	0	0.147394	0	0	0	16.2135
mus_retrom72264	0	0	0	0	0	4.33697
mus_retrop106918	0	0	0	0	0	31.6136
mus_retrom59282	7.51224	6.22229	9.8989	15.0346	9.66486	15.753
mus_retrom71756	0	0	0	0	0	21.9349
mus_retrom45856	0	0	0	0	0	1.65461
mus_retrom45850	0	0	0	0	0	3.63343
mus_retrom45852	0.0541796	0	0	0	0	12.43
musiretrom10607	0	0	0	0	0	6.60566
mus_retrom48516	0.172752	0.226952	1.74155	0	0	0.765058
mus_retrop102426	0	0	0	0	0	2.039
mus_retrom44511	0	0	0	0	0	3.12897
mus_retrom123574	0	0	0	0	0	4.8831
mus_retrom105504	0	0	0.089027	0	0	2.18303
mus_retrom79905	0	0	0	0	0	428.181
mus_retrom40716	9.24079	9.26606	5.25644	5.04775	5.11314	9.19017
musiretrom10233	0	0.653178	2.21174	1.74572	0	0
mus_retrom91497	0	0	0	0	0	1.28088
mus_retrom106218	0	0	0	0	0	1.84629
mus_retrom65939	0	0	0.847777	2.14689	0	0
mus_retrom41057	0	0	0	0	0	1005.87
mus_retrop73764	0	0	0	0	0	8.14462
mus_retrom100533	0	0	0	0	0	24.8768
mus_retrom100537	0	0	0	0	0	35.3949
mus_retrom42698	0.253139	0.305279	0.0791852	0	0	54.045
mus_retrop101951	0	0	0	0	0	1.00422
mus_retrop86910	0	0	0	0	0	34.9499
musiretrop01978	0	0	0	0	0	2.63476
musiretrom22766	0	0	0	0	0	131.954
mus_retrom72849	0	0	0	0	0	2.39377
mus_retrop44823	0	0	0	0	0	8.0467
musiretrom03116	2.14118	3.53758	3.29456	1.40568	1.85761	4.94126
mus_retrop100929	0	0	0	0	0	2.24084
musiretrom30803	5.86146	7.56606	5.56925	7.05889	10.6558	9.6951
musiretrom22353	0	0	16.8461	0	0	0
mus_retrop53141	0	0	0	0	0	9.78336
mus_retrop54498	0	0	0	0	0	4.04243
mus_retrop87027	0	0	0	0	0	26.0017
mus_retrom108094	0	0	0	0	0	15.6946
mus_retrom102170	0	0	0	0	0	112.502
mus_retrop52425	0.266026	0.135259	0	0.241809	0	2.1458
musiretrop30372	19.9366	22.8531	42.3074	32.132	41.5263	40.6154
mus_retrom96895	0	0	0	0	0	248.878
mus_retrom103412	7.07425	3.77677	0	0	0	0.363264
musiretrop30598	0	0	0	0	0	2.70791
mus_retrom80482	0	0	3.21678	0.814449	0.296346	91.159
mus_retrom41298	0	0.341455	0	0	0	20.1453
mus_retrom81987	0	0	7.3573	0	0	0
mus_retrom72920	1.10645	1.06685	2.34138	1.54819	1.7639	0
mus_retrom108019	0	0	0	0	0	1.20581
mus_retrop44234	0.912697	0	0.3561	1.43717	1.22033	2.92864
musiretrop34559	5.08252	6.27644	0	0	0	0
mus_retrop111983	0.933331	0.780143	0.984678	1.44371	1.69805	0.229371
mus_retrom109003	0	0	0	0	0	16.2197
mus_retrop101172	0	0	0	0	0	6.37839
mus_retrom96027	0	0.142438	0.0489302	0	0	6.96713
mus_retrom98541	0	0	0	0	0	96.9231
musiretrop13198	0	0	4.7756	0	0	0
musiretrom03960	0	0	0	0	0	97.2709
mus_retrop89328	0	0	0	0	0	1.72878
mus_retrop66346	0.789565	1.31989	3.53258	1.44232	2.14145	0.706205
musiretrop34327	3.35131	1.86451	0.424562	0.501876	0	4.98477
mus_retrom123903	7.97065	9.13983	10.5953	18.4415	12.554	3.17072
mus_retrom50473	36.9119	31.7867	72.1323	74.4028	189.384	86.0163
mus_retrop69578	0	0	0	0	0	5.16117
mus_retrom124016	0	0.092889	0	0	0	9.10224
mus_retrop54074	0	0	0	0	0	48.2017
mus_retrom61496	0	0	0	0	0	8.74794
musiretrom09420	0	0	0	0	0	3.30296
mus_retrom71816	0	0	0	0	0	6.46933
mus_retrom80362	0.129941	0	0	0	0	26.0722
mus_retrop113876	0	0	0	0	0	1.14831
musiretrop08845	1.33751	1.87876	1.40462	1.49043	1.23792	0.922899
mus_retrom40956	0	0.485191	2.41897	0	0	0.0183471
mus_retrom41029	12.7291	11.1969	8.16207	10.3817	14.0169	9.60574
mus_retrop96971	11.9026	10.9475	0.130513	0	0	0
mus_retrop49162	0	0	0	0	0	1.30426
mus_retrop78825	0	0	0	0	0	400.698
mus_retrom59026	4.59435	2.58976	0	0	0	1.03637
mus_retrom45614	0	0	0	0	0	2.13788
mus_retrop101570	28.3285	24.5813	21.8492	18.027	18.911	4.08613
mus_retrom80165	0	1.06427	0	0	0	1.27765
mus_retrom69416	0	0	0	0	0	29.7318
mus_retrom69414	3.06944	4.69794	0	0	0	0
mus_retrop95696	0	0	0	0	0	1.61002
mus_retrop53990	3.11488	5.81237	6.4767	11.9814	19.1891	7.15851
musiretrom03012	5.73587	5.7486	11.4815	7.93865	7.28575	7.05685
mus_retrop49855	0	0	0.56671	0.932036	2.67782	0
mus_retrom109173	0	0	0	0	0	6.6375
mus_retrop114001	2.16955	1.73458	2.82631	4.77664	2.71449	3.20256
mus_retrop101009	1.04794	0.693819	0.240817	0.435786	0.150999	0
mus_retrom97605	0	0	1.05548	0	0.761123	0.943924
mus_retrom50089	0	0	0.610546	0	1.57684	1.97801
musiretrom07320	0	0	0	0	0	7.03436
mus_retrop78965	0	0	0	0	0	13.9677
mus_retrop52410	1.59035	1.87003	0.475302	1.04968	0.607615	0.135186
mus_retrop92122	0	0	0	0	0	20.1437
mus_retrop52885	15.0137	10.9661	13.2866	10.5746	11.2865	214.598
musiretrop13650	0	0	0	0	0	3.42167
mus_retrom58907	0	0	0	0	0	3.49911
mus_retrom101392	0	0	0	0	0	12.4755
mus_retrop114705	0	0	0	0	0	92.0478
mus_retrop86720	0	0	0	0	0	1.08266
musiretrom31734	0	0	0	0	0	77.778
musiretrom13595	7.55251	5.59631	14.1998	9.67089	5.55343	4.56026
mus_retrop70634	15.3539	7.33565	0.130592	0.912281	0	0.840878
mus_retrop74746	0	0	0	0.885002	18.9184	0
mus_retrom50401	0	0	0	0	0	1.91754
mus_retrop65646	0.387282	0	0	1.26732	3.23118	0
musiretrop30459	49.4418	45.2749	29.9281	25.147	26.2976	12.2085
mus_retrop97067	0	0	0	1.15423	0	0
mus_retrom100454	0	0	0	0	0	58.3399
mus_retrop100839	0	0	0	0	0	2.5206
mus_retrom91966	0	0	0	0	0	4.231
musiretrop19621	3.76471	3.09352	0.379192	0.490863	0.380308	31.9537
mus_retrom65903	0	0	0	0	6.2591	1.87774
mus_retrop96242	0.945177	0.762748	0	1.39157	2.77691	0
mus_retrom100617	0	0	0	0	0	314.513
mus_retrop52192	0	0	0	0	0	7.15354
musiretrom35009	0	0	0	0	0	5.50622
mus_retrom45624	0	0	0	0	0	11.74
mus_retrom72362	0	0	1.48969	0.951843	0	0
mus_retrop92527	1.31986	2.12688	1.19888	3.00429	1.95854	3.79503
mus_retrop46229	26.8991	20.0605	15.6896	20.1291	28.0825	5.70593
mus_retrop99884	0	0	0	0	0	4.06769
mus_retrop94954	0.127166	0	0	0	0	93.3481
mus_retrom40738	0	0	0	0	0	121.561
mus_retrom60084	0.524531	0.187081	1.37261	0.708443	0.595433	0.301067
mus_retrop112192	3.97357	3.67989	3.95937	5.28547	7.94355	72.8967
mus_retrom46474	0	0	0	0	0	112.687
mus_retrom98064	0	0	0	0	0	1.32009
musiretrom14733	3.91253	6.1307	2.40906	1.58541	1.28694	1.93
mus_retrop91945	275.441	284.845	43.0067	32.6852	26.8625	20.4356
mus_retrom66171	0	0	1.42449	0	0	0
mus_retrom96504	0	0	0	0	0	7.45961
mus_retrop114730	1.02093	0	0	0	0	0
mus_retrom80331	0	0	0	0	0	4.81761
mus_retrop79606	0	1.21158	1.22974	0	3.83681	11.5009
mus_retrop56772	6.35617	3.70383	3.7613	7.06717	1.26115	1.6842
mus_retrom109068	0	0	0	0	0	1.74543
mus_retrop95814	0	0	0	0	0	2.01788
mus_retrop54154	12.3645	5.54702	2.73827	7.03193	2.43662	479.916
mus_retrop45861	0	0	0	0	0	42.0123
mus_retrom43596	0	0	0	0	0	1.75133
musiretrom15167	0	0	0	0	0	164.609
mus_retrop53974	0	0	0	0	0	172.813
mus_retrop74421	0	0	0	0	0	5.51426
mus_retrop79686	0	0	0	0	0	10.1791
mus_retrop50323	0.106616	0.561449	0	2.35732	0	0
mus_retrop101159	0	0	0	0	0	9.15832
mus_retrom46200	0	0	0	0	0	6.92685
mus_retrop85572	0	0	0	0	0	2.52766
mus_retrom71748	0	0	0	0	0	1.26279
mus_retrop50179	0	0	0	0	0	65.1735
mus_retrop74711	21.4316	24.4772	15.3405	22.8807	10.0762	70.7203
mus_retrom42691	0	0	0	0	0	9.28683
musiretrom28926	0	0	0	0	0	146.729

## Sheet: Rat
# Supplemental Table S3: Retrocopy expression in rat
# Expression data are in FPKM; each value corresponds at the median FPKM across all samples from that organ
retro_ID	Brain	Cerebellum	Heart	Kidney	Liver	Testis
rnoiretrop46370	0	0	0	1.00936	1.5069	0.467689
rno_retrom03205	0	0	0	0	0	40.339
rno_retrom03206	0	0	0	0	0	42.7422
rno_retrom01198	0	0	0	0	4.18626	1.23378
rno_retrom00869	0	0	0	0	0	4.58841
rno_retrom05501	0	329.218	4904.02	1339.86	0	0
rnoiretrop47746	317.87	128.943	308.981	200.947	69.287	100.435
rnoiretrom23769	0	0	0	0	0	2.23982
rno_retrop02914	0	0	0	0	0	7.13541
rnoiretrop02331	63.002	71.879	548.682	245.181	421.17	31.8134
rno_retrom07386	0	0	0	5.266	0	0
rno_retrop00430	0	0	0	0	0	4.03382
rno_retrom03633	0.227305	0.246373	1.2955	0	0.996908	9.64604
rno_retrom03639	264.757	264.214	1298.04	754.499	1913.47	354.718
rno_retrop02493	0	0	0	0	0	462.105
rnoiretrop27889	5.82323	0	0	0	0	0
rno_retrom05901	0	0	0	0	0	129.489
rno_retrom06765	0	0	0	0	0	6.56197
rnoiretrop45695	0	0	1.98162	0	0	0
rnoiretrom24409	0	0	0	0.0485715	0	101.682
rnoiretrop42635	47.3715	34.2367	47.6109	26.5713	26.4811	608.404
rnoiretrop07303	0	0	0	0	0	5.49238
rno_retrom00529	0	0	0	0	0	6.20056
rno_retrom05320	5.49858	5.01453	2.74943	3.46908	4.48384	5.05235
rnoiretrop46035	0	0	2.11759	2.07749	3.76595	0.426361
rnoiretrop23514	2.90409	1.72687	0	0	0	0
rno_retrom04152	0	0	0	0	0	3.92797
rnoiretrop37512	1432.05	1326.74	1844.17	1652.52	2692.32	1773.78
rnoiretrom31144	2.04011	1.43508	0.830313	0.897638	0.458924	1.43434
rnoiretrop23726	0.48888	0.326089	0.664621	0.209353	0	704.716
rno_retrom00149	10.7319	10.5662	12.986	14.2173	21.8824	17.8996
rno_retrom00768	0.634072	1.64371	1.40366	3.29095	0	1.67208
rno_retrom06644	10.1183	11.6477	52.0619	20.108	37.402	3.01138
rno_retrom07517	5.66338	6.65281	4.03868	3.21803	3.52698	2.93579
rno_retrop02652	0	0	0	0	0	3.57418
rno_retrop02653	0	0	0	0	0	6.89052
rno_retrom03525	0	0	0	0	0	77.4393
rno_retrom00407	1.18907	1.26997	0.470116	0.69121	0.665037	0.698479
rno_retrom06023	0.490524	0.656073	1.1309	0	0	0.453389
rnoiretrop36353	0	0	0	0	0	329.849
rno_retrom02593	28.0453	23.2657	70.8811	40.1796	27.3773	16.0329
rno_retrom02049	1.33478	1.18265	1.31755	0.756491	0	0.985607
rno_retrop00117	0	0	0	0	0	8.32838
rnoiretrop38207	0	0	1.00853	1.71752	2.54392	0.490964
rnoiretrop22211	42.3467	47.3175	74.4138	65.2785	64.8846	133.501
rnoiretrop23994	0.49612	0.410611	1.52317	2.02099	7.47627	0.41294
rnoiretrop30781	19.1428	20.1027	0	0	0	1.76377
rnoiretrom23354	32.1163	21.4757	3.14759	9.28095	18.0113	62.8058
rnoiretrop27011	6.74891	5.5874	1.22478	4.27213	0	878.34
rno_retrom07044	1.10705	5.06987	0	0	0	0
rnoiretrop51865	0.159423	0	0	0	0	9.52469
rno_retrop00973	0.352694	0	1.9491	0	0	3.01963
rnoiretrop46431	0	0	0	0	0	119.731
rno_retrom01720	3.88687	3.51738	4.25496	4.84742	5.13745	1.78899
rno_retrom01897	0	0	0	0	0	2.97285
rno_retrom01895	0	0	0	0	0	6.77209
rnoiretrom03660	0	0	0	2.09724	0	2.3157
rno_retrom05253	0.483169	0.336459	2.74383	0.869987	1.33694	0
rnoiretrom01420	18.1508	11.1296	3.66047	1.06339	0	0.674398
rnoiretrop42602	0	0	0	0	0	4.61616
rnoiretrop34937	7.26498	8.92932	11.394	14.2196	15.9502	96.9659
rnoiretrom01748	25.5375	12.3501	0	0.85702	0	3.41379
rno_retrom04400	0	0	0	0	0	9.81025
rno_retrom06116	0.612166	0.54689	1.11371	0.207766	0	0.226805
rno_retrop00846	0	2.42072	8.72894	8.36146	13.8491	3.67702
rno_retrop00448	14.7221	12.817	10.4796	9.7018	12.3559	8.15618
rnoiretrom49964	0.591075	0.601161	0.501972	0.304881	0	64.6841
rno_retrom01991	0	0.118683	0	0	0	249.239
rnoiretrop26500	0	0	0	0	0	191.907
rnoiretrop28917	1.48655	1.73143	1.1205	1.98243	3.59565	0.228963
rno_retrom06679	0	0	0	0.491018	0	7.46294
rno_retrop01001	0	0	0	2.61591	0	0
rno_retrom05653	0	0	0	11.1345	0	0.442434
rnoiretrom12303	19.2391	15.5306	0	0	0	0
rnoiretrop37097	0	0	0	0	0	2.18071
rno_retrom00382	0	0	0	0	0	10.7885
rnoiretrop41496	1.34747	1.34396	0.606851	0.728757	0	0.479789
rno_retrop01630	0	0	0	0	0	1.99341
rno_retrom01829	0	0	0	0	0	29.0342
rno_retrom01825	16.6959	23.0742	22.2569	54.7872	54.8617	39.9837
rno_retrom06199	0.288787	0	0.429154	3.58653	1.39171	0.206375
rno_retrop00066	0.109906	0.124257	0	0.0882287	0	125.401
rnoiretrom29246	54.3963	43.4872	111.709	77.0748	139.614	65.3577
rno_retrom02682	114.139	117.281	979.499	575.609	1206.86	40.6171
rno_retrom01656	914.285	629.094	179.668	128.148	159.056	327.352
rnoiretrom17809	0	0	1.08795	0	0	0.122639
rnoiretrop46976	0	0	0	0	0	22.911
rno_retrom06531	0	0	0	0	0	43.2485
rnoiretrop50975	9.1634	17.3681	0	0	0	53.4215
rnoiretrom53288	1.20962	0.768472	0	0	0	81.5953
rnoiretrop26298	0	0	0	0	0	82.5456
rno_retrom06702	0	0	0	0	0	5.37588
rnoiretrop04195	5.69384	4.59017	4.66919	6.03429	10.2609	12.7875
rno_retrom00841	0	0	0	1.45823	2.30833	0
rnoiretrop25996	9.85004	7.47961	17.2116	8.82212	8.77736	2.95365
rnoiretrop22075	0	0	0	0	0	25.2547
rnoiretrop28782	0	0	0	0	0	194.331
rno_retrom02924	0	0	0	0	0	2.48718
rnoiretrop35637	0	0	0	0	0	29.6137
rnoiretrop42824	0	0	0	1.71452	0	0
rno_retrom00350	5.78761	5.36892	4.40079	5.70108	3.75539	7.20589
rno_retrom03615	0	0	0.269872	0.329676	0	1.46982
rno_retrop00413	0	0	0	0	0	3.84553
rnoiretrop37116	0.455463	1.02067	0	0.311572	0.263145	0.498573
rnoiretrop21291	20.5256	18.3172	40.6651	32.2498	59.3197	16.0738
rno_retrom05928	147.33	142.001	340.489	310.277	325.311	56.8611
rno_retrom05929	0	0	4.08936	3.80244	5.36758	0.94843
rnoiretrop16854	1.16471	1.87603	1.86913	1.0504	0.669262	5.51688
rno_retrom01131	0	0	0	0	0	4.27304
rno_retrom05497	0	0.754673	1.44807	1.02407	0	0.340929
rno_retrom02448	0	0	0	0	0	7.86429
rno_retrom05499	0	0	0	0	0	394.831
rno_retrom05148	0	0	0	0	0	248.661
rno_retrom05149	3.80583	4.29139	1.9118	2.40514	2.29473	6.7177
rno_retrom03426	1.69468	2.01934	6.17553	3.41288	0	0
rnoiretrom03774	1.18582	1.07955	1.08589	0.972343	1.831	2.01481
rnoiretrop34653	0.815979	0.7902	0	0	0	1.46914
rnoiretrop27666	0.310755	0.169895	0	0	0	8.32943
rnoiretrop14539	0	0	0	1.02065	0	0
rnoiretrop32797	1.91066	0.786812	0	0	0	0.117371
rno_retrop00816	0	0	0	0	0	13.0256
rnoiretrop51747	0	0	0	0	0	1.39632
rnoiretrop47573	62.2444	39.116	340.12	185.961	248.321	20.2727
rnoiretrop32347	0	0	0	6.42196	0	9.37129
rno_retrom01083	0	0	0	0	0	2.26152
rnoiretrop35779	2.68384	4.43166	2.73612	3.59285	1.54662	3.33946
rnoiretrom44403	0	0	0	0	0	4.33968
rno_retrom00939	1.27629	1.28695	2.87647	34.7419	21.0432	0.591739
rno_retrom00930	0	0	0	0	0	10.0394
rnoiretrop26880	0	0	3.21337	0	0	0
rno_retrop02069	4.57025	3.81971	6.66296	8.0656	2.81892	2.11863
rno_retrom05410	0.166957	0	0	0	0	85.8385
rnoiretrop45877	0	0	0.572131	1.24651	0	0.186745
rno_retrom05594	0	0	0	0	0	3.65385
rno_retrop00703	34.0773	32.9005	43.5443	45.2214	62.0317	6.41366
rno_retrom03501	0.194904	0.500203	0	0	0	123.477
rno_retrom01625	0	0	0	0	0	5.22923
rnoiretrop28730	0	0	0	0	0	3.43837
rno_retrom07318	5.78463	5.34462	62.4599	34.9044	32.3353	177.843
rnoiretrop39959	0	0	0	0	0	163.283
rnoiretrom04072	0	0	0	0	0	46.2946
rnoiretrop24671	2.17647	1.63766	1.86091	2.06878	3.15772	3.69169
rnoiretrom46830	0	0	0	0	6.76156	0
rnoiretrom13116	0	0	0	0	0	8.43219
rno_retrom05517	0	0	0	0	0	86.1447
rno_retrom05894	33.0621	38.194	50.7479	43.4941	41.4845	17.0692
rno_retrom06277	0	0	0	0	0	542.617
rno_retrom05705	0	0	0	2.07674	0	0
rnoiretrom50451	0.294499	0	0.402907	0.671526	1.24467	0.75224
rnoiretrop01976	4.48838	2.91023	1.04698	0.526277	0	25.4145
rnoiretrop16398	0	0	0	0	0	341.862
rnoiretrop28873	0	0	0	0	0	5.92862
rno_retrom06751	0	0	0	0	0	1.51182
rno_retrom04661	0	0	0	0.757004	39.6589	0.611396
rnoiretrop29007	0	0	0	0	0	1.33078
rno_retrop00670	0	0	0	0	5.58848	0
rno_retrop00678	6.73297	6.10146	3.97548	7.25541	5.4027	12.1833
rno_retrom00516	0.118503	0	0	0	0	292.742
rnoiretrom31774	0	0	0	0	0	16.6402
rno_retrom02668	3.35681	3.25421	5.73441	5.01194	0	767.843
rno_retrop01066	0	0	0	1.08833	0	0
rnoiretrop13976	0	0	0	0	0	5.36143
rno_retrom02258	1.2473	1.67394	0.481514	0.583226	0	1.90851
rno_retrop02235	0.0477302	0.0848774	0	0	0	88.7227
rnoiretrom03962	0	0	0	0	0	81.4865
rnoiretrop26733	0.717655	1.17335	0	2.01159	0	1.37299
rno_retrop00546	2.59965	1.01095	0	0.424363	0	0
rno_retrom02191	0	0	0	0	0	23.0943
rnoiretrop41352	0	0	0	0	0	4.60986
rnoiretrom00272	0	0	0	0	0	303.761
rnoiretrom11219	0	0	0	0	0	15.9389
rnoiretrop44398	1.20214	1.07606	0.84938	0.516316	0.514559	1.72889
rno_retrom06651	0	0	0	0	0	1.07601
rno_retrom01395	0	0	28.3425	0	0	0
rno_retrop02645	0	0	0	0	0	10.6702
rnoiretrop29325	0	0	0	0	0	11.1916
rno_retrom03049	0	0	0	0	0	5.13063
rnoiretrop29810	0	0	0	0	0	9.33099
rnoiretrop34812	20.2744	28.1548	152.048	24.525	33.7504	3.44774
rnoiretrom13632	14.0653	8.96428	22.268	17.7824	21.5742	6.70169
rno_retrom06032	0	0	0	0	0	4.31222
rnoiretrop50913	0.367224	0.387279	1.35266	2.26406	2.46473	26.3829
rno_retrom02058	3.01664	3.0075	1.92854	3.57674	3.37089	18.1406
rno_retrop01658	2.13171	2.76299	4.27647	2.32747	0	1.61487
rnoiretrop52160	80.9534	151.928	0	0	0	0
rnoiretrop29289	0	0	0	0	0	9.31306
rnoiretrop28888	0	0	0	0	0	1.12414
rno_retrom00823	1.0134	0.710215	2.72729	0.406258	0	0
rno_retrom02323	0.638311	0.35048	0	0	0	3.9629
rnoiretrop30635	0	0	0	0	0	9.85221
rnoiretrop37078	0	0	0	4.92317	0	0
rnoiretrom53961	19.6127	17.0388	50.0033	31.0091	24.9781	11.0363
rnoiretrom41306	0	0	0	0	0	2.19103
rnoiretrop31690	193.248	130.633	203.461	59.5722	44.4892	20.6234
rnoiretrop36471	5.99577	3.20895	0	26.3584	171.602	0
rno_retrom02506	0	0	0	1.86643	0	0
rnoiretrop35108	30.0153	37.122	50.7723	30.2124	30.0771	51.4093
rno_retrom03365	0.522654	0.512766	0	0	0	1.81988
rno_retrom06586	0	0	0	0	0	2.04344
rnoiretrom24606	10.8779	12.2763	17.1826	14.6187	0	6.59608
rno_retrom04651	0	0	0	0	0	2.13229
rno_retrop01114	144.255	133.967	363.915	319.698	375.513	48.6168
rno_retrom02716	0	0	0	0	0	9.97791
rno_retrop00645	0	0	0	0	0	125.439
rno_retrop00642	0	0	0	0	0	60.5886
rnoiretrom36039	6.47819	5.6952	0	0.696759	0	6.51572
rno_retrom04414	0	0	0	0	0	2.53407
rno_retrom06819	0	0	0	0	0.366899	1.71279
rno_retrom03059	0	0	0	0	0	13.3789
rno_retrom03052	0.969708	1.49761	1.28359	0.804749	0.735603	5.82507
rno_retrom02909	0	0	3.74976	0	0	0
rnoiretrop41837	0	0	0	0	0	22.5355
rnoiretrom23402	0	0	0	0	0	3.64081
rno_retrop00473	0	0	0	0	0	1.29429
rnoiretrom26562	3.76285	3.78503	5.12539	4.75832	4.18488	1.18242
rnoiretrop37794	0.299953	0.929649	3.39529	4.16429	0	10.4398
rnoiretrop00202	30.4813	52.9843	74.472	83.5302	79.1983	78.3892
rnoiretrom44834	240.999	199.329	1648.54	776.239	1275.34	257.672
rnoiretrop31219	2.09843	1.24857	0.274314	0	0	0.427739
rno_retrom05369	0.643025	0.433283	1.17238	0.919567	0.611537	12.4727
rno_retrop01833	1.52509	1.17226	2.00211	0.798687	0.430859	0.376459
rnoiretrop29372	1.26111	0.99586	0	0	0	26.5012
rno_retrop00763	0	0.350029	0.385531	0	0	6.07642
rno_retrom00443	0	0	34.0143	0	0	0.0615126
rnoiretrop15439	3.79482	2.95843	7.77938	5.15859	3.53932	35.93
rno_retrom06067	0	0	0	0	0	191.67
rno_retrom00957	0	0	0	0	0	19.2787
rno_retrop02004	0	0.282774	0	0	0	16.6684
rno_retrop00537	0	0	0	0	2.81483	0.302328
rno_retrom06929	0	0	0	0	0	59.8988
rnoiretrop47415	1.56303	0.945144	3.8059	0.67437	0	6.0569
rnoiretrom23055	0.153	0	0	0.201289	0	206.196
rnoiretrop13633	0.817834	2.07221	7.53911	0	13.0466	922.186
rno_retrop01277	0	0	0	0	0	2.90396
rno_retrom06353	3.36266	4.22576	3.46169	2.99639	91.5678	9.82512
rno_retrop01188	0	0	0	4.68106	0	1.68683
rno_retrom04199	1.05337	1.99003	0	0.645062	0.936749	0
rno_retrom04192	3.18053	2.85737	6.41236	3.38716	2.84829	10.2118
rno_retrom02694	0.19875	0.137659	0	0.0286234	0	6.34281
rno_retrom02690	0	0	0	0	0	112.655
rno_retrop02414	1.38163	1.22634	0	0	0	0
rno_retrom01641	0	0	0	0	0	3.36624
rnoiretrom13669	0	0	0	24.7843	1134.35	0
rnoiretrop30203	0	0	0	0	0	78.5802
rnoiretrop17251	9.61613	11.5947	9.10814	12.0161	17.8945	11.7136
rnoiretrop32549	0	0	0	0	0	2.44718
rno_retrop00489	0.941862	0.837981	1.48322	2.16005	45.1008	1.72566
rnoiretrop39111	29.0812	27.4931	13.7458	15.6707	13.5001	30.3794
rnoiretrop47973	0	0	0	0	0	84.2437
rnoiretrop29768	0	0	0	0	0	13.382
rno_retrop02322	0	0	0	13.9915	9.33102	4.80408
rnoiretrom14651	0	0	0	0	0	365.413
rno_retrom07000	3.53832	0	0	0	0	21.138
rno_retrom02257	71.8877	65.3955	72.3271	45.624	63.1502	154.063
rno_retrop00221	6.10623	4.63174	58.1104	46.0905	9.2644	34.0516
rnoiretrom06308	3.36846	3.55303	6.37566	4.64341	0	0.526619
rno_retrop02285	0	0	1.06797	0	0	47.6643
rno_retrom03609	0	0	0	0	5.90127	0
rno_retrom01769	30.4857	0	13.6228	16.4293	16.0394	0
rnoiretrop50268	87.1856	53.1632	699.74	320.927	550.144	92.6057
rno_retrom03181	0	7.53165	34.8608	0	0	0.532552
rno_retrom03189	0	0	0	0	0	8.60482
rno_retrom05936	0.809736	5.25307	3.12635	2.81618	6.75633	3.49559
rnoiretrop24697	0	0	0	0	0	21.122
rnoiretrom49771	7.13252	16.6828	10.357	8.92985	7.40852	9.61385
rno_retrom07420	4.3796	3.46864	0	0	0	0
rno_retrop02509	15.2518	16.4835	23.1153	21.5166	11.6406	18.4858
rnoiretrop29062	20.4462	12.9465	8.15785	11.4408	9.38891	17.3207
rno_retrop00610	0	0	0	0	0	156.004
rnoiretrop29930	8.5109	4.7216	0.156062	0.379761	0	1.86937
rnoiretrom13712	0	0	0	0	0	8.58832
rnoiretrom44124	0	0	0	0	0	1.49452
rno_retrom04443	115.363	69.8999	58.2995	48.0006	118.912	23.396
rno_retrom04444	4.30274	5.72616	0	0	0	0
rno_retrom04166	9.23816	5.04882	0.824656	0.435784	0	4.67654
rnoiretrop42067	1.2728	8.22622	25.6747	36.6832	21.0123	95.6978
rno_retrom04108	0	0	0	0	0	9.80849
rno_retrom02648	0	0	0	0	0	9.52337
rnoiretrop36907	27.3207	19.0337	10.6312	14.228	20.0851	6.9666
rno_retrom06444	0	0	0	0	0	1.59929
rnoiretrop45337	5.72729	3.84039	0	0	0.70578	0.209877
rno_retrop00697	0	0	0	0	0	3.91546
rno_retrop00883	0	5.63294	0	6.2024	0	14.2159
rno_retrom07502	0	0	1.35134	0	0	13.6099
rnoiretrop32066	0	0	0	0	0	10.0708
rnoiretrop38007	2.87573	2.81962	11.1409	2.37551	6.34289	1.96523
rno_retrom05057	0.473789	0.614771	0.378848	1.31994	2.51314	0.333059
rnoiretrop25365	57.8621	54.2059	226.319	137.852	260.862	232.648
rnoiretrom21481	35.966	29.7499	46.2102	48.5521	84.4399	43.0257
rno_retrop01676	0	0	0	0	0	10.0116
rno_retrop00105	192.54	149.873	39.3462	17.7015	23.2897	5.64121
rnoiretrom46969	0	0	0	0	0	3.49106
rnoiretrop30799	3.35114	2.83774	0	0	0	0
rno_retrop02311	0	0	0	0	0	2.06011
rno_retrop02315	0	0	0	0	0	616.284
rnoiretrom18953	0	0	0	0	0	84.1474
rno_retrom00583	0.365583	0.37364	0.20813	0.372865	0.225761	4.71567
rno_retrom02344	0	0	0	0	0	333.64
rno_retrom06289	0	0	0	0	0	528
rno_retrom02569	0	0	0	0	0	5.77576
rno_retrom02563	0	0	0	0	0	53.1569
rnoiretrop35160	6.97045	4.52375	2.44184	4.28205	1.87354	73.5971
rnoiretrop35769	0	0	0	0	0	9.19619
rno_retrop01910	6.38943	5.33018	3.91809	4.84506	3.46949	0.744168
rnoiretrop26842	7.94796	7.04986	5.05747	8.26383	11.273	7.53208
rno_retrom01172	0	0	0	0	0	158.664
rno_retrom06740	0	0	0	0	0	4.27756
rno_retrom01288	0	0	0	0	0	4.7485
rno_retrom05104	2.3774	1.86301	3.37196	3.06658	2.9603	5.52801
rnoiretrop21667	26.0374	14.7136	85.885	50.208	75.2789	12.4494
rnoiretrop30697	23.2507	17.3715	14.9939	17.461	21.5243	4.67921
rno_retrop00855	0	0	0	0	0	63.8213
rnoiretrop41572	12.9346	11.6839	21.0907	30.7223	40.7149	70.9018
rno_retrom07159	9.31592	24.1515	18.9453	19.402	26.4798	2.08521
rno_retrom03657	0	0	0	5.74407	3.54964	0
rnoiretrop45975	0	0	0	0	0	5.49013
rnoiretrop28395	12.5075	5.71114	0	0	0	2.65589
rno_retrom02884	0.230949	0	0	6.1912	0	0.408129
rnoiretrom13923	4.00135	4.34853	32.3036	149.13	381.672	25.8871
rno_retrom05963	0	0.233201	0	0	0	282.447
rno_retrom05960	0	0	0	0.384219	0.252675	1.14635
rno_retrom06434	0.72442	0	0	0	0	1.55662
rno_retrop01208	0	0	0	0	0	15.5869
rno_retrom01987	2.1113	1.76431	5.48946	5.40912	8.04804	21.8777
rno_retrom02188	0	0	5.00453	3.41513	0	3.39155
rno_retrom02185	0	0	0	0	0	4.41015
rnoiretrop28634	0	0	0	0	0	18.9907
rnoiretrop26572	2.01729	2.39429	4.22681	5.9933	11.4677	6.37952
rno_retrom07256	1.65754	1.45855	0	0	0	0
rno_retrom06664	0	0	0	0.258973	0	206.972
rno_retrom04139	0	0.814197	0	0	0	38.8983
rno_retrom04137	6.33883	4.28744	0.833982	0.472115	0.285225	1.21725
rnoiretrop32756	0	0	0	0	0	289.077
rno_retrom03541	58.7898	37.7538	36.7431	22.7616	10.5938	7.00176
rnoiretrom52607	0.417928	0.814011	0.623942	0.957917	1.68207	1.21177
rno_retrom00425	0	0	0	0	0	108.921
rno_retrom00392	1.81791	2.91345	0	0.0972346	0	0
rno_retrom05064	0.701622	0	0.182235	0.192139	0	3.38418
rnoiretrop28312	18.4973	12.3246	11.7153	13.9384	16.0763	4.0177
rnoiretrop37771	0	0	0	0	0	5.62912
rnoiretrop26261	0	0	0	0	0	2.79627
rnoiretrom39569	1150.24	991.397	4072.52	2506.58	4108.15	608.622
rno_retrop00077	0.622231	0.884625	0.429436	1.673	2.03733	4.51423
rnoiretrop45169	59.8282	75.1132	576.051	134.511	153.649	6.72054
rno_retrop00078	0	0	0	5.35493	12.5977	0
rno_retrom04200	65.2531	58.1946	15.4414	17.0929	11.4655	5.07325
rno_retrop02182	0	0	0	6.4386	5.73789	0
rno_retrom00664	0	0	0	0	0	3.53317
rno_retrom00565	0	0	0	0	0.663134	1.83986
rnoiretrop41183	0	0	0	0	0	633.237
rnoiretrop27754	35.4288	33.7684	131.861	56.8079	75.7425	10.1458
rnoiretrop10740	3.36108	3.30662	1.97992	3.06538	2.3057	4.76885
rno_retrom05235	0	0	0	0	0	59.157
rnoiretrop25180	4.99583	2.63297	16.1858	4.60952	15.7692	6.80933
rnoiretrom26422	237.569	215.929	1405.57	569.559	887.319	359.307
rno_retrom01800	0	0	1.76649	0	0	0
rno_retrom04625	0	0	0	0	0	13.7223
rnoiretrop34951	0.57376	0.876672	1.95412	1.15391	4.08887	0.459873
rno_retrop02104	0	0	0	0	0	3.1177
rnoiretrop25027	0	0.237	0.137664	1.40076	0	30.7841
rno_retrop00249	0	0	0	0	0	127.383
rno_retrop00246	0	0	0	0	0	36.2314
rno_retrop00245	0.349673	0	0.951229	1.0327	0	0.609064
rnoiretrom15067	4.24928	1.82413	6.12372	0.733259	0	115.58
rnoiretrop01769	0	0	0	0	0	20.4466
rno_retrom02477	701.575	407.801	212.383	43.991	40.0004	28.0886
rno_retrom02788	1.38907	0	1.67249	0	0	10.5335
rnoiretrom40900	0	0	0	0	0	314.508
rno_retrop01848	0	0	0	2.51948	0	0
rno_retrom04105	0	0	0	0	0	3.33478
rno_retrom04109	0	0	0	0	0	17.4979
rnoiretrop30055	0	0	0	0	0	3.21349
rnoiretrop02382	188.363	162.078	2026.41	717.075	1558.56	202.452
rnoiretrop35811	0	0	0	0	0	7.17427
rnoiretrop52208	0	0	1.55896	0.463614	0	0
rnoiretrom40894	0	0	0	0	0	245.697
rnoiretrop29023	5.351	2.66957	0	0.666248	0	4.83918
rno_retrom06078	0.942337	0	0	0	0	13.4624
rno_retrop00987	0.553897	0.628319	5.68198	1.26919	0	0
rno_retrop01610	0	0	0	0	0	21.8131
rnoiretrom02035	0	0	0	0	0	15.3277
rnoiretrom03921	4.89307	4.80516	7.70093	7.45901	5.85892	9.44945
rno_retrom06461	0	0	0	0	0	2.14287
rno_retrop00507	9.57392	11.396	9.45707	7.58377	6.78121	23.6334
rnoiretrop30480	0	0	0	0	0	37.9153
rnoiretrop35041	0	0	0	1.68525	0	156.574
rno_retrom04271	0.928566	1.40553	0.697194	0.646123	0.615763	0
rnoiretrop35898	627.94	851.557	1248.36	819.676	966.237	214.443
rno_retrom05033	0	0	0	1.16211	0	0.200892

## Sheet: Opossum
# Supplemental Table S3: Retrocopy expression in opossum
# Expression data are in FPKM; each value corresponds at the median FPKM across all samples from that organ
retro_ID	Brain	Cerebellum	Heart	Kidney	Liver	Testis
mdo_retrom14375	0	0	0	0	0	6.89486
mdo_retrom08205	7.16777	11.4703	18.6488	18.5824	18.8927	9.44857
mdo_retrom04929	5.06109	11.157	5.76911	3.13374	0	1.99048
mdo_retrom00200	0	0	0	0	1.05968	1.13972
mdo_retrom00202	74.1855	37.5154	5.52971	14.5435	2.22238	1.9159
mdo_retrom30328	0	0	0	0	0	232.057
mdo_retrop31315	11.0851	10.1797	76.7625	212.144	304.75	5.35908
mdoiretrom11848	0.25388	0	0	0	0.892088	5.10139
mdo_retrop29527	3.44849	2.57868	4.4302	0.78814	0.60957	1.5994
mdo_retrop12930	0	0	0	0	0	2.22551
mdo_retrom28759	0	0	0	0	0	29.7513
mdoiretrop01762	0.114999	0	0	0	0	3.52901
mdo_retrop10359	0	0	0	0	0	3.13803
mdo_retrom03905	2.31788	1.87287	0	0	0	0.377556
mdoiretrom28508	1.62271	1.68115	3.2622	3.30243	7.40121	0.643587
mdo_retrop16352	3.66069	2.1388	2.24776	1.82285	0	1.05963
mdo_retrom12020	0	0	0	0	0	36.3527
mdo_retrom29768	21.2143	13.9189	83.4598	59.4846	102.036	24.6891
mdoiretrop04873	5871.12	5644.53	2807.08	4160.52	1982.61	17496.6
mdoiretrop18789	26.0507	9.84016	0.632963	0	0	0
mdo_retrop13185	0	0	0	0	0	10.15
mdo_retrop17293	7.2031	5.16679	4.73935	6.08146	8.33178	29.1665
mdo_retrom26526	0	0	0	0	0	194.887
mdo_retrop24648	2.19229	0	0	0	0	1.77076
mdo_retrom07277	137.26	148.501	405.521	484.309	959.555	73.0313
mdo_retrop08318	5.8484	9.06768	21.4604	10.5944	15.5068	4.13282
mdo_retrom31260	0.807324	1.21386	0	0	0	0
mdo_retrom12226	0	1.59466	0	0	0	120.197
mdoiretrop11347	3.17405	2.39085	0.801769	0.782353	0.383065	0.309236
mdo_retrop23678	16.8766	11.9992	39.5581	25.1715	16.7761	3.25875
mdoiretrom23783	4.85411	9.25266	17.8219	10.7165	13.5681	2.30924
mdoiretrom21259	4542.41	3196.37	1794.91	2397.52	1316.52	11831.6
mdoiretrom20127	0.0600544	0	0.316038	0	0	185.854
mdoiretrop29784	5.09271	4.95604	5.79079	14.2679	9.50653	1.57186
mdoiretrop16765	25.8324	12.0638	9.0186	4.64764	6.73492	7.03133
mdo_retrom14831	50.81	51.0167	54.049	50.5264	70.6219	16.802
mdoiretrop11436	3.14093	1.47522	2.26027	1.32057	0.874228	8.14405
mdo_retrop00398	0	0	0	0	0	2.27006
mdo_retrom09388	0.151677	0	0	0	0	1936.33
mdo_retrop07332	0	0	0	0	0	7.49248
mdo_retrop00286	0	0	0	0	0	2.74405
mdoiretrom10596	15.1562	9.14363	8.61435	5.67118	7.52547	11.646
mdo_retrom26768	1.05617	0	0	0	2.49389	0
mdo_retrop14397	0	0	0	0	0	48.7881
mdo_retrop03297	0	0	0	0	0	7.41387
mdo_retrop11364	0	0	0	0	0	36.0262
mdo_retrom15271	0	0	0	0	0	32.968
mdo_retrop13862	0.777896	0	2.55747	0.669432	2.23425	0.263962
mdo_retrop06850	0	0	0	0	0	394.404
mdo_retrom23270	1.43187	3.30037	12.2835	0	0	0.907575
mdoiretrop02476	0	0	0	0	0	80.9147
mdo_retrom18810	1.42456	0	0	0	0	0.0647144
mdoiretrom16262	2.05093	0.953173	0	0.817525	0	0.237145
mdo_retrom04761	7.57104	6.14221	60.5202	116.975	206.096	8.64864
mdo_retrop00465	0	0	0	0	0	2.60065
mdo_retrom06585	3.92308	4.91179	3.91935	5.25685	10.8718	1.37363
mdo_retrop00032	7.08847	19.1609	6.8831	3.04016	6.61042	9.58252
mdo_retrop04541	0	0	0	0	0	98.4239
mdo_retrop15960	0	0	0	2.19963	0	0.497907
mdoiretrom05124	7.14116	7.23208	22.3864	10.9921	6.56215	7.57516
mdo_retrom28002	0.709267	0.547146	1.16543	2.37229	0	0.252649
mdoiretrop13055	0.852318	0.62683	1.57213	0.886406	0.552892	0.246485
mdoiretrop18004	0	0	0	0	0	6.69405
mdo_retrom18746	0	1.01786	0	0	0	0
mdoiretrop20333	0.170755	0.223678	0.843814	0	0	24.0557
mdoiretrop04819	2.00601	0.881393	1.24985	1.18196	2.18987	0.92789
mdoiretrop10550	0	0	0	0	0	42.82
mdo_retrom09037	3.54844	3.37234	7.29514	0	8.36527	17.6346
mdo_retrop17921	0	0	0	0	0	16.5441
mdo_retrom09637	8.02093	6.95572	10.7858	6.30651	14.906	4.64481
mdo_retrop14356	0	0	0	0	0	13.0669
mdoiretrom08494	0	0	0	0	0	1.07703
mdo_retrom00341	0	0	0	0	0	5.97771
mdoiretrop11017	4.86792	4.6966	9.80929	32.969	4.07983	5.47139
mdoiretrop26432	1.71002	3.1899	5.217	22.5345	48.9047	0.3885
mdoiretrom29350	0	0	0	0	0	38.9812
mdo_retrop00426	0	0	0	0	0	1.18106
mdo_retrom22905	1.47555	1.23852	0.175052	0.437368	0	0.217891
mdo_retrop04506	0	0	0	0	0	31.9799
mdo_retrop27109	0	0	0	0	0	35.1057
mdo_retrop19415	0	0	0	0	0	14.7841
mdo_retrom00408	0	0	0	0	0	7.67943
mdo_retrop25690	2.99281	2.33735	5.12963	5.89292	5.78133	6.31298
mdoiretrom19409	2.34649	0	0	0	0	0
mdoiretrom14010	2.27245	0.825135	3.33646	0.694422	1.96787	7.81606
mdo_retrom31347	3.64215	0	0	0	0	0.196507
mdo_retrom30962	32.5396	23.8957	23.8691	15.9331	11.0901	36.6353
mdoiretrom16569	2.08276	1.19907	9.94885	8.04344	3.26829	4.29987
mdo_retrop21431	0.217836	0.111879	0.416995	68.0783	0.977355	0
mdo_retrom19643	0.383105	0.83788	0.58573	1.22512	1.80593	0.0468879
mdo_retrop19087	0	0	0	0	0	15.5693
mdo_retrop12889	11.1671	3.90515	3.94136	3.91319	3.58224	3.89357
mdo_retrop01016	13.4607	7.55133	0	0	0	36.2364
mdo_retrom05215	0	0	0	0	0	170.159
mdo_retrop31459	2.71726	2.64168	1.17215	0	0	0.143673
mdo_retrop28480	1.80005	1.75127	0	0	0	0.153016
mdo_retrop28487	15.8968	10.822	0	0	0	0
mdo_retrom00415	28.9045	58.3447	38.1525	46.5616	42.6243	228.896
mdo_retrom22589	5.93089	8.45726	19.7094	23.1093	24.2181	3.80502
mdoiretrop29057	0.0678005	0	0	0	0	1002.46
mdo_retrop13787	16.9764	25.2248	73.6326	74.2289	108.978	14.3926
mdoiretrop24066	2.60121	3.46116	3.95367	0	0	0
mdo_retrop00927	3.76872	5.1895	0.17867	0	0	0.21318
mdo_retrom24755	0.560042	0.238727	0.371229	0	0.512745	139.537
mdo_retrop05004	0	0	0	0	0	36.9031
mdo_retrom30778	2.2232	3.53998	4.01471	9.88452	5.10346	0.337057
mdo_retrom16490	0.648738	1.06463	0	0	0	1.15648
mdo_retrop11037	0	0	0	0	0	11.3073
mdo_retrom05247	0	0	0	0	0	22.0296
mdo_retrop26601	0	0	0	0	0	1.40104
mdo_retrom27519	16.7053	8.65634	6.67124	9.25143	7.94282	2.65135
mdo_retrop03771	0	0	0	0	0	3.54702
mdo_retrop03770	0	0	0	0	0	4.63159
mdo_retrom20397	0	0	0	0	0	7.44621
mdo_retrom20393	0	0	0	0	0	70.8135
mdo_retrom11276	0.521508	0	0	0	0	7.47172
mdo_retrop30312	6.40232	7.17542	4.94327	29.8304	17.3282	2.28985
mdoiretrop15978	0	0	0	0	0	22.3998
mdo_retrom22825	0	0	0	0	0	289.874
mdo_retrom09983	3.30565	1.51616	0	0	0	1.3329
mdo_retrop09827	0	0	0	0	0	5.58467
mdoiretrom13192	7.94741	19.5767	11.5946	16.9971	17.7772	12.2855
mdoiretrop20584	207.466	160.629	177.773	105.271	82.3998	103.427
mdo_retrop17647	0	0	0	0	0	12.013
mdoiretrop19272	3.161	0	17.2623	8.80392	0	0
mdo_retrop24507	8.27941	0	0	0	0	3.4765
mdo_retrop24506	0.529772	0.291814	0	1.24196	1.72395	13.6092
mdo_retrop21021	243.634	331.254	35.8537	27.6055	29.1891	12.9843
mdoiretrom24082	12.5897	6.27173	6.49108	9.37694	12.6154	8.2003
mdoiretrom17279	0	0	0	0	0	73.9925
mdoiretrom13350	14.3411	18.3248	14.6812	14.2581	11.1212	7.05715
mdo_retrop04759	5.61682	0	0	0	0	0
mdo_retrop28484	1.68378	2.17606	0	0	0	0
mdo_retrop05408	3.54553	4.40939	5.85796	6.49097	2.4531	8.52044
mdo_retrom22988	0.913149	0	0	0	0	1.41558
mdo_retrop31438	1.48105	0.753671	0	0	0	0.232261
mdo_retrop31434	0	0	0	0	0	1.28498
mdo_retrop21647	0	2.95572	6.16383	4.66647	0	0
mdo_retrom27910	1.38955	0	1.76455	0	0	3.42699
mdo_retrom03377	0.346617	0	0.182812	0.316162	0.899777	4.63186
mdo_retrop19580	0	0	0	0	0	11.2246
mdoiretrom21894	0	0	0	0	0	180.867
mdo_retrom00482	0	0	0	0	0	4.00028
mdo_retrom00480	0	0	0	0	0	1.42399
mdo_retrom03906	1.89041	1.85689	1.72994	1.24488	1.49117	0.68329
mdo_retrop30915	1.15438	1.46039	0	0	0	0
mdo_retrom00102	0	0	0	0	0	1.2372
mdoiretrop20270	0	0	0	6.9046	0	0
mdo_retrom07458	0	0	0	0	0	309.248
mdoiretrom26368	12.4034	10.3907	38.7466	22.22	19.4475	6.56825
mdo_retrom16788	4.2082	0	0	4.56486	0	0.769014
mdo_retrom28333	4.43905	9.24236	22.8892	20.1662	21.0352	54.0324
mdo_retrop16555	0.146993	0	0	0	0	790.681
mdoiretrop15857	0	0	0	0	0	6.42372
mdo_retrop09939	0	0	0	0	0	154.207
mdo_retrop09688	0	0	0	0	0	95.6133
mdo_retrop12835	18.7304	13.507	6.73753	13.0366	9.92202	8.22041
mdoiretrop30272	1.53078	2.80763	5.90186	3.85847	1.49332	1.42602
mdoiretrom26175	0	0	0	0	0	1.85521
mdo_retrop00883	0	0	0	0	0	5.84192
mdo_retrom25300	4.48141	5.28842	0.502403	0	0	0
mdo_retrop25490	43.5885	36.4928	130.365	225.425	335.144	31.6651
mdo_retrop29131	1.9905	0.673576	0	1.60336	6.036	147.501
mdo_retrom03927	0	0	0	0	0	33.5722
mdo_retrom31814	0.852451	0.733583	0	0	1.60544	0.333285
mdo_retrom22227	0	0	0	0	0	11.2695
mdoiretrom20979	0	2.47411	0	20.2838	1.15579	1.58338
mdo_retrom25948	0	0	0	0	0	1255.09
mdo_retrom11765	83.3788	0	0	0	0	61.1892
mdo_retrop05443	0.247045	2.312	12.0215	7.17859	29.5855	0.0946566
mdoiretrom17953	65.3417	7.79211	4.34112	6.67533	3.5777	0.850781
mdo_retrop17221	14.6788	8.66244	23.499	13.7719	18.2165	18.1378
mdo_retrom11688	0	0	0	0	0	6.01293
mdo_retrop11479	9.61371	9.1942	7.76648	7.11685	7.59906	1.51287
mdo_retrop08296	2.70164	2.12891	3.81432	1.68433	1.54621	1.37746
mdo_retrom30652	4.76094	2.18215	2.7779	38.0534	3.37427	0.659069
mdo_retrom25495	6.90878	9.21662	6.55342	5.9645	2.86458	5.81548
mdo_retrom07177	5.79685	5.26114	0.529872	0.724242	0	1.05527
mdoiretrom28579	0.15677	0	0	0	0	1590.94
mdo_retrop26097	0	0	0	0	0	2.65989
mdo_retrom13271	0.847453	1.01443	0.715378	18.9522	4.42242	0.0279201
mdo_retrop00185	0	0	0	0	0	3.71029
mdo_retrom05737	0	0	0	0	0	2.90747
mdo_retrom21985	0	0	0	0	0	3.69585
mdo_retrop25519	0.126297	0	0	0	0	18.8521
mdo_retrom20698	0	0	0	0	0	51.1909
mdo_retrop06965	0	0	0	0	0	4.92723
mdoiretrom17372	27.6348	40.6639	34.9847	0	37.9208	0
mdo_retrop11450	91.7335	59.2809	12.8673	8.46802	6.97059	2.36003
mdo_retrom21629	4.76371	2.8465	8.43137	6.49377	9.66691	8.65675
mdoiretrop04902	0	0	0	0	0	19.9828
mdo_retrop00922	51.3968	58.2278	0.473354	0	0	4.60401
mdo_retrop24589	1.93392	0	8.33785	12.7817	15.513	7.3963
mdo_retrom30102	0	0	0	0	0	32.3717
mdo_retrop07309	0	0	0	0	0	9.70501
mdo_retrop11845	0	0	0	0	0	15.9975
mdo_retrop25213	0	0	0	0	0	230.554
mdoiretrop16452	0	0	0	0	0	36.4807
mdo_retrop18053	0	0	0	0	0	2.29958
mdo_retrom07692	2.33255	1.76519	0	0	0	0.0784027
mdoiretrom21606	0	0	0	0	0	9.22398
mdoiretrom26475	624.934	218.944	293.72	431.827	345.264	202.066
mdo_retrop15531	0	0	0	0	0	1.30987
mdoiretrom17423	8.99124	11.1796	10.645	16.3132	13.2613	15.5299
mdo_retrop00572	0	0	0	0	0	6.2405
mdo_retrom19724	3.58684	1.07221	0	0	0.566811	1.92635
mdo_retrop01629	2.4381	0.4389	0	0.25462	0	4.59594
mdo_retrop12672	0.121017	0	0	0	0	98.473
mdo_retrop09724	2.97689	0	0	4.88612	12.266	0
mdo_retrom05444	17.9146	2.60566	3.8113	1.65737	30.7836	4.26628
mdo_retrop00498	5.42525	4.66774	0	0	0	1.66178
mdo_retrom14364	9.08701	3.83928	3.33875	4.81921	4.89349	15.1191
mdoiretrop09956	0	0	0	0	0	49.2531
mdo_retrop02842	0	1.4157	0	0	0	1.22528
mdo_retrom00547	10.0596	5.31017	2.62459	2.66837	1.83799	1.00511
mdo_retrop23217	1.04506	0.719406	0.502616	0	0	0.476251
mdo_retrop16118	0	0	0	0	0	222.079
mdo_retrop16117	0.0635757	0	0	0	0	193.702
mdoiretrom11833	0	0.985528	0	0	0	55.7904
mdo_retrom08681	2.98731	1.42949	0.796555	0	0	0.0363153
mdo_retrom27468	1.80116	0	0	0	0	0
mdo_retrop11114	0	0	0	0	0	1.44176
mdo_retrom13616	0	0	0	0	0	31.4684
mdoiretrom17091	0	0	0	0	0	2.67917
mdo_retrop00128	0	0	0	0	0	1.05863
mdo_retrop16926	0	0	0	0	0	7.49183
mdoiretrop21616	8.75763	9.60923	1.09948	0.870961	3.54263	6.53025
mdo_retrom00217	5.0889	4.7017	0.260084	0	0	0.482454
mdo_retrom00213	2.71877	0.159145	0	0	0	4.47995
mdo_retrop24405	7.156	1.83857	0	0	0	0
mdo_retrom07982	0	0	0	0	0	28.8085
mdo_retrop06627	0	0	0	0	0	68.5171
mdo_retrop10697	0.103301	0.252656	0.390299	0	0	6.18849
mdo_retrop17962	20.8107	10.2418	13.2878	15.7133	13.2336	10.3274
mdo_retrop16778	0	0	0	0	0	2.26568
mdo_retrop18941	18.6788	16.2253	37.9709	29.078	50.9565	7.02284
mdo_retrop16345	4.80671	5.22502	7.84936	8.42839	7.42702	10.1148
mdo_retrop17161	2.48133	0	0	0	0	0
mdo_retrop06886	3.00808	4.5117	8.10272	5.01435	5.64937	4.90864
mdo_retrom05402	0	0	0	0	0	329.755
mdo_retrop21291	0	0	0	0	0	4.07771
mdo_retrop17405	0.266568	0	0.467543	0	1.60398	0.0850261
mdo_retrop00450	3.68845	4.20977	1.32	1.05649	0	6.50483
mdo_retrop05976	0	0	0	0	0	10.0074
mdoiretrom13616	0	0	0	0	0	17.7333
mdo_retrop31496	2.88933	1.76062	1.9735	1.07253	3.01518	0.533322
mdoiretrop09866	0	0	0	0	0	1.97159
mdo_retrop08328	0.541932	1.02532	0.705466	0.686793	0	14.9588
mdo_retrop06865	4.73025	4.81884	0.525801	0	0	1.5298
mdo_retrom13168	1.40069	0	0	0	0	0
mdo_retrom25983	0.662192	2.05495	0	0	0	0
mdo_retrop23508	22.6274	22.8394	16.624	57.9377	31.4514	9.97612
mdo_retrop12928	0	0	0	0	0	21.7699
mdoiretrop17583	16.6842	38.6134	173.636	131.053	213.907	8.54674
mdo_retrop03877	0	0	0	0	0	6.24812
mdo_retrop00789	1.78337	3.30783	5.25052	5.23795	1.76473	4.07482
mdo_retrop22277	1.42351	1.65934	0	0	6.67969	11.3578
mdo_retrom19157	0	0	0	0	0	2.15259
mdo_retrop15952	2.09057	2.60354	2.01857	3.51757	3.98592	13.1592
mdoiretrom05857	0	0	0	0	0	26.316
mdo_retrom14537	26.2877	16.0361	27.2873	29.1976	35.9231	15.6614
mdo_retrom08716	1.52758	3.39046	8.63222	4.6279	2.15428	4.77351
mdo_retrop03667	22.3358	6.42115	0	35.2046	0	0
mdo_retrom02718	0.375803	0	0	1.2406	2.62485	7.0368
mdo_retrom00875	84.7297	89.8018	23.1727	10.1314	4.6148	3.9976
mdo_retrom00016	0.424563	0.288353	0.696064	0.556837	0	6.44137
mdoiretrom29523	33.6109	23.4062	62.3553	41.123	27.4865	12.0711
mdo_retrop13483	0	0	0	0	0	1.22863
mdo_retrom30939	0	0	0	0	0	2.26279
mdo_retrop00645	20.1892	20.1577	0	0	0	0
mdo_retrop10475	2.15698	4.04127	3.19901	0	5.92878	1.44847
mdo_retrom00486	16.5917	8.71838	4.16229	3.6888	2.48012	3.77609
mdo_retrom29792	8.61049	7.58463	5.81325	4.66218	5.53813	1.0046
mdo_retrom25029	24.9822	13.7587	14.2063	15.9973	11.9049	165.938
mdo_retrop28306	0	0	0	0	0	2.57406
mdo_retrom08521	0	0	0	0	0	13.1249
mdoiretrop14658	7.62117	3.98775	11.7831	26.7033	6.86201	7.96613
mdoiretrom26257	18.8989	0	0	0	0	0
mdo_retrop05660	92.924	51.771	21.6369	10.9621	10.3654	22.4689
mdo_retrop16465	6.79403	0	0	0	88.0831	96.8715
mdoiretrom06729	50.3407	30.1697	0	96.7268	61.2857	23.8602
mdo_retrom22191	0.842529	1.88101	0	0	1.09238	0.0465824
mdo_retrop14009	2752.85	2072.54	583.101	309.209	460.41	1672.62
mdo_retrom01023	0.871146	1.03574	0	0	0	0
mdoiretrop03170	183.185	49.9127	49.5821	90.7928	84.2895	113.854
mdo_retrom23876	2.41246	3.7813	2.96874	6.22359	3.24108	107.574
mdo_retrom08665	35.0874	24.9109	73.8075	107.83	241.94	8.8107
mdoiretrop29815	0	0	0	0	0	4.81168
mdo_retrop30736	0	0	0	0	0	10.9877
mdo_retrop26985	0	0	0	0	0	70.8823
mdo_retrom05597	0	0	0	0	0	7.24043
mdo_retrom05595	0	1.01804	89.8835	16.2963	0	24.0154
mdo_retrom30023	1.42523	0	0	0	0	0
mdoiretrop16592	1.29972	3.69077	3.10505	46.5598	374.982	143.705
mdo_retrop00371	2.24244	1.2413	2.49463	0	0	1.66286
mdo_retrop16799	0	0	0	0	0	136.793
mdo_retrop16791	0	0	4.151	0	145.178	8.26141
mdo_retrom15152	99.6246	83.6775	197.635	280.128	348.322	27.568
mdo_retrom21932	363.508	228.659	176.301	169.668	199.385	244.509
mdo_retrop08838	0	0	0	0	0	22.9791
mdo_retrop16752	4.83523	3.06026	0.527242	0	0	0.6343
mdo_retrom18718	23.0171	17.2698	16.6689	45.3297	71.418	7.12984
mdo_retrop03702	10.4646	4.48215	4.78426	4.99683	7.25272	8.19379
mdo_retrom00782	77.1291	68.3419	7.81311	3.09593	2.10857	4.51222
mdo_retrop31059	0	0	0	0	0	62.9981
mdoiretrop23929	25.5269	23.7065	17.6891	12.2298	13.3783	13.5108
mdo_retrop30091	0.584988	0	0	1.96982	3.24879	0.141178
mdo_retrom26247	12.6255	13.8779	2.4219	4.23754	5.91684	11.1429
mdo_retrom06278	0	0	0	0	0	6.36768
mdo_retrop20423	12.2299	4.57768	13.8725	6.36676	5.03021	1.38084
mdo_retrom18501	1.33811	1.49614	0.666934	0	0	19.048
mdo_retrom15174	0.245831	0.58557	0	0	0	3.41196
mdo_retrom29657	0	0	0	0	0	2.58071
mdo_retrom21959	0	0	0	0	0	4.30717
mdo_retrop00232	0	0	0	0	0	4.3486
mdo_retrop31468	1.23179	2.01712	1.13618	0	0	0
mdo_retrop20097	4.98513	3.73064	4.43551	4.23631	5.70186	62.2864
mdo_retrop30333	0.256158	0	0.64288	0.939143	0.695679	14.6572
mdo_retrom28157	7.70829	9.0742	7.50804	10.9468	14.2975	7.74651
mdo_retrom25405	7.98893	5.59218	4.8833	4.9344	3.90724	12.391
mdo_retrom11539	0	0	0	0	0	1.20169
mdo_retrom07116	0	0	0	0	0	17.7609
mdoiretrom25691	0	0	0	0	0	54.5516
mdo_retrop22662	0	0	0	0	0	181.252
mdoiretrom23528	141.209	150.884	448.463	0	518.579	0
mdo_retrop00918	0	0	0	0.92242	0	8.71592
mdo_retrom07486	417.619	515.361	1614.37	2883.33	4346.05	472.171
mdoiretrop21313	6.15153	2.54565	4.60989	3.66216	1.87037	6.27683
mdo_retrop16589	3.58782	4.38728	1.07288	0	0	0
mdo_retrop27543	23.7593	57.1233	9.03302	15.3537	6.05023	9.25791
mdo_retrom27996	0.199228	0.67072	0.210147	21.3187	7.78414	1.08581
mdo_retrom25559	0	0	0	0	0	104.326
mdoiretrom26120	11.4636	9.63587	2.86462	5.33676	1.99658	36.5189
mdoiretrom29674	0.624281	0	2.47783	0	0	1.05732
mdo_retrop29163	11.7473	7.27737	16.3381	6.56812	9.99497	1.69885
mdo_retrop07242	0.564354	1.07881	0	0	0	2.28088
mdo_retrop14917	0	0	0	0.983152	0	113.017
mdo_retrop30695	1.41913	0.825176	0	1.01545	0	1.20941
mdo_retrop20712	1.11164	1.34455	1.26095	3.317	1.94892	9.61656
mdo_retrom26176	0	0	0	0	0	6.53947
mdo_retrom26173	23.674	29.1536	95.9675	84.1531	104.151	23.3126
mdoiretrom04828	3.10075	4.33418	8.75468	5.08556	7.18166	2.45359
mdo_retrop29330	0.392759	0	0.358368	0	0	21.4701
mdo_retrom12143	0	0	0	0	0	76.9442
mdo_retrom02313	0	0	0	0	0	2.21612
mdo_retrom14037	19.1535	14.355	63.7353	83.3777	86.1923	12.7699
mdoiretrom05299	1.59186	21.5114	25.7286	0	0	15.3594
mdo_retrop25487	0	0	0	0	0	326.265
mdo_retrom23696	11.206	4.23631	2.2717	5.74255	8.15965	8.25656
mdo_retrop12248	0	0	0	0	0	124.94
mdoiretrom14593	32.458	8.3473	3.03635	3.0106	5.12573	23.4987
mdoiretrom26968	0.453103	0	0	0.918421	1.95073	3.01738
mdo_retrom00399	0	0	0	0	0	6.55596
mdo_retrom00391	0	0	0	0	0	4.8858
mdo_retrom16462	3.64247	3.33478	2.96147	1.99777	1.91309	1.30071
mdo_retrom00231	2.1726	2.34586	12.2215	7.79622	6.04636	5.7451
mdo_retrop05430	0	0	0	0	0	113.322
mdoiretrop09139	119.183	102.515	178.898	218.124	259.491	61.8266
mdo_retrop29310	0	0	0	0	0	24.0621
mdo_retrop27561	0	0	0	0	0	2.46867
mdo_retrom14078	0.109038	0.399824	0	1.10056	0.570036	0
mdo_retrom26098	0.865509	1.86912	0.73501	1.64197	1.17539	0.768825
mdo_retrop00521	0	0	0	0	0	1.19865
mdo_retrop20034	39.7646	32.0486	84.7092	50.9041	22.4781	79.1072
mdo_retrop20782	6.00084	6.67569	5.53261	4.53002	3.26939	7.3213
mdo_retrom02416	0.346823	1.49901	3.00912	5.32331	5.00587	2.81082
mdoiretrop15472	8.51304	12.7818	24.1058	26.696	33.1143	14.3267
mdo_retrom00473	0	0	0	0	0	5.04011
mdo_retrop09132	1.6394	0.477815	0	0	0	0.486662
mdo_retrom16322	128.881	143.803	0.553954	0	0	0.866092
mdo_retrop03417	5.14097	1.43576	0	1.57309	0	3.18609
mdo_retrom12298	0	0	0	0	420.603	0
mdoiretrom10096	0.976395	2.0954	8.20093	7.78984	7.90716	0.920829
mdo_retrop24517	63.9635	32.7759	53.5717	36.1584	94.286	31.684
mdo_retrom19986	1.08445	0	2.45985	3.65481	6.42958	1.00339
mdo_retrom25954	0	0	0	0	0	18.3244
mdo_retrom11755	12.6592	10.8698	10.6558	10.3844	5.03412	26.4177
mdo_retrop01598	3.70506	3.66359	0	0	0	16.4909
mdo_retrom26429	4.37033	6.60218	11.0285	5.15195	6.54797	10.8676
mdo_retrom00515	1.25191	2.36375	8.52893	6.84847	7.96264	1.56604
mdo_retrop12637	9.70397	9.21331	1.24993	1.42777	0.978854	7.46128
mdo_retrop25563	253.162	144.228	24.637	5.43334	7.5529	7.58727
mdoiretrop20493	0	0	0	0.344565	0	2.9622
mdoiretrom06829	0	0	0	0	0	292.908
mdo_retrom13058	0	0	0	0	0	27.8722
mdoiretrop25883	0.198111	0	0	0	0	1.39769
mdo_retrom28689	0	0	1.16969	1.25499	0.721094	0
mdo_retrop08285	0	0	0	0	0	13.6405
mdo_retrom18791	478.126	167.043	268.394	244.403	198.855	410.998
mdo_retrop17023	3.18212	2.25427	12.3791	20.3148	4.13159	2.01917
mdoiretrop18623	0	0	59.1536	75.2985	74.4221	0
mdo_retrop22500	0	0	0	0	0	6.65645
mdo_retrop27685	20.7351	9.89213	7.76969	28.9223	0	936.129
mdo_retrop19256	0.677419	0.692228	2.05929	1.79976	1.81011	0.473091
mdoiretrop22255	9.62227	12.7513	7.25313	8.457	3.61357	1.4539
mdoiretrom04110	0	0	0.419718	0	0	5.07998
mdo_retrom17770	1.72148	2.21759	2.05956	1.54303	0.722179	7.15372
mdo_retrom15505	30.3298	27.2197	44.2285	57.5139	56.9909	7.30897
mdo_retrop04782	0	0	0	0	0	142.205
mdoiretrom16367	0	0	0	0	0	13.9167
mdo_retrop00562	0	0	0	0	0	2.24891
mdo_retrom10752	16.0291	14.6194	0.880406	0.274968	0.325586	0.229323
mdo_retrop25488	0	0	0	0	0	478.726
mdoiretrom24812	29.9633	11.4099	20.4382	15.1922	7.60652	10.2539
mdo_retrom11714	1.43185	1.18458	1.27415	0	0	1.49467
mdo_retrop08836	0	0	0	0	0	4.81438
mdoiretrom15920	0	0	0	0	0	153.472
mdo_retrop16339	6.17775	5.83657	4.08049	5.59113	4.35783	4.58134
mdo_retrop24922	2.5164	1.84602	2.60002	1.53046	2.38713	3.16834
mdo_retrom11284	0.453034	0.458889	2.4957	3.72009	6.0265	0.0765006
mdo_retrom16003	3.09517	5.90413	19.3234	32.5405	37.3315	2.94623
mdo_retrop29128	0	0	0.676043	0	0	65.4266
mdo_retrop07395	0	0	0	0	0	27.5909
mdoiretrom03749	11.4456	8.45445	8.77574	4.31534	4.03917	0.339443
mdo_retrop00546	3.98039	1.82139	0.831222	0.440886	0.812554	11.679
mdo_retrop23384	0.50608	0	0	4.57932	22.4407	2.34155
mdo_retrom25119	0.452421	0	0.669583	4.5574	0	6.58194
mdoiretrom04836	0	0	0	0	0	12.4567
mdo_retrom23968	0	0	0	0	0	8.29699
mdo_retrop29544	8.45119	6.14304	2.81476	4.6096	7.48573	3.15353
mdoiretrop16623	13.8663	15.8448	19.8984	32.2805	39.5736	28.6623

## Sheet: Platypus
# Supplemental Table S3: Retrocopy expression in platypus
# Expression data are in FPKM; each value corresponds at the median FPKM across all samples from that organ
retro_ID	Brain	Cerebellum	Heart	Kidney	Liver	Testis
oan_retrop126208	14.447	11.1788	41.326	14.2643	22.0328	10.385
oan_retrom38776	0	0	0	0	1.09004	0
oan_retrom127499	1.10803	1.18371	0.603395	6.92548	0.240853	2.63275
oan_retrom126855	2.42461	1.00491	0.371457	0.672945	0.908171	2.8281
oan_retrop107037	2.60548	4.26055	1.48654	1.73797	1.16417	1.36379
oaniretrom05180	89.2027	131.219	149.246	82.8856	89.622	80.1708
oan_retrop00261	6.89013	6.00751	4.18822	3.43082	2.38471	4.83186
oan_retrop119631	0.734049	2.3161	0	0	0	0
oan_retrom129105	0	0	0	0	0	62.4216
oan_retrop74679	201.615	168.975	49.1714	84.685	84.3747	295.725
oan_retrom17075	0.366974	0	0	2.4041	0	0.207668
oaniretrom11968	0.293847	0.205303	0	0	0	5.44512
oan_retrop125959	23.8472	18.2313	13.4615	7.7175	46.3379	26.3655
oan_retrom129524	2.02314	0	0	7.5016	2.57245	0
oan_retrom12129	0.172724	3.58309	0	1.13599	0	0.166262
oan_retrom16712	19.8477	19.6426	12.415	14.2515	14.4351	7.96279
oan_retrom20148	0.391443	7.2783	0	0	0	0
oaniretrop05060	471.184	270.327	2383.68	404.149	713.743	296.915
oan_retrom69557	8.81264	18.4042	8.46416	67.1913	161.266	5.0877
oan_retrop37550	0	0	0	0	0	1.02939
oaniretrom10399	7.93561	14.9212	1.27187	1.19254	1.10428	4.25407
oan_retrop72203	4.18485	11.5754	0	0.452158	0	1.01951
oan_retrop126225	0	0	0	0	0	114.558
oaniretrom07383	0	0	0	0	0	3.00018
oan_retrop133005	9.49758	15.8117	21.7228	19.1844	21.1572	12.7611
oan_retrom36574	46.348	44.401	30.0109	24.0148	17.5915	3.66265
oan_retrom65879	24.3111	5.73651	0	0	0	0.266895
oaniretrom06956	113.067	114.285	141.387	399.468	114.145	123.404
oan_retrop127541	0	0	0	0	0	534.658
oan_retrom17703	10.4771	14.0121	0	0	0	0.128349
oan_retrop131671	16.1263	11.4229	61.3259	14.4158	26.2323	15.6096
oaniretrop11805	6.27003	7.6075	8.78154	5.26872	6.36028	11.2893
oan_retrop126234	0	0	0	0	0	32.0099
oan_retrop133053	6.68588	2.54599	0	0	0	0
oan_retrop06356	0.214169	0	0	1.44556	0	0
oan_retrop119743	452.869	287.491	68.1694	39.9161	21.9101	15.9442
oaniretrom04596	0	0	0	0	0	9.03576
oan_retrop52296	0	0	0	0	0	1.67112
oan_retrop20598	0.300028	0	0	1.02282	0.541916	0
oan_retrom55179	2.99542	4.19515	1.43213	2.12243	0.638962	0.624633
oan_retrom00465	0	0	0	6.91479	0	0
oan_retrop126179	14.2278	9.76679	24.0403	33.1881	30.5975	9.78317
oan_retrop55395	0.0670846	2.77349	0	0.830657	0	0
oan_retrom09697	0	3.05931	0	1.49945	0	0
oan_retrop25199	0	4.27985	0	1.59155	0	0
oan_retrom56357	18.899	1.83841	0.322455	0	0	0
oan_retrom131171	0	0	0	0	0	72.8247
oaniretrom09488	0.0208536	0	0	1.67575	42.5346	6.5589
oan_retrop06268	0.627097	0	0	0	0	12.1303
oaniretrop02384	23.243	29.78	37.505	114.875	62.4479	56.4535
oan_retrop02517	0	0	0	27.1245	0	0
oan_retrom128595	6.02882	6.31468	4.35533	7.57442	8.77727	4.93097
oan_retrom128591	2.95452	0.339821	37.8175	1.9783	0.933169	0.503535
oan_retrop45880	6.45249	11.1014	14.1032	11.754	13.7702	8.24326
oan_retrom128494	3.5254	5.83427	7.54151	7.02926	5.37121	4.88778
oan_retrop82600	8.8918	9.71887	7.22219	9.15838	17.0434	12.2024
oan_retrom88909	32.37	28.6756	17.1052	20.9296	8.15116	160.561
oaniretrop04765	10.5849	11.01	27.0122	20.3543	15.663	5.13842
oaniretrom04180	0	0	8.5523	0	0	0
oan_retrom79213	0	0	50.349	0	0	2.69143
oan_retrop131877	1.51629	0	0	0	0	0.172009
oaniretrom09786	0	0	0	0	0	35.4394
oan_retrom128698	0.834647	4.05355	0	0	0	0
oan_retrop131774	2.9164	0.784834	0.922758	4.58301	17.6398	0.466658
oan_retrop04876	1.21703	28.4931	0	13.5438	0	1.38437
oan_retrop81589	13.3439	11.871	12.9018	30.1953	12.4623	198.675
oan_retrop71248	0.267082	0.423389	0	74.4569	37.2473	9.27366

## Sheet: Chicken
# Supplemental Table S3: Retrocopy expression in chicken
# Expression data are in FPKM; each value corresponds at the median FPKM across all samples from that organ
retro_ID	Brain	Cerebellum	Heart	Kidney	Liver	Testis
gga_retrom39850	0	0	0	0	0	75.4348
gga_retrom39838	0	0	0	0	0	76.4444
ggairetrom02117	1.32643	0.903491	0	4.07087	11.936	3.9372
ggairetrop04656	0	0	0	0	0	2.86305
gga_retrop26346	8.68158	13.9703	32.9422	11.633	10.9097	3.45811
gga_retrom38547	2.09634	1.89857	1.65887	10.6863	4.72782	1.62941
ggairetrop03163	67.2792	54.1096	45.3819	25.979	58.0674	21.118
gga_retrop28989	43.7963	26.0295	15.3935	11.2807	29.1069	5.85036
ggairetrom06696	1.03637	0	0	0.313641	0	3.17737
ggairetrop07140	0	0	0	0	0	406.758
ggairetrop07623	2.26109	2.74204	24.3329	3.69774	2.23416	77.2082
ggairetrom04952	2.77548	4.04662	4.74448	2.61146	3.28433	1.23996
gga_retrop27561	21.4548	19.4184	29.0388	61.7556	69.6813	9.32122
gga_retrom34241	7.21169	12.3551	127.236	0	0	0.480835
gga_retrop26238	260.435	192.284	123.588	145.223	141.429	223.789
gga_retrom34034	114.676	82.8647	20.4169	3.57255	2.11166	8.67106
gga_retrom35658	188.052	271.51	984.318	1004.22	628.471	288.7
ggairetrop05638	2.96373	2.94018	3.5401	5.80178	7.75452	2.60618
ggairetrom02121	1.58444	5.84526	1.60177	1.7529	1.07436	1.35633
gga_retrop31095	420.455	235.6	38.0455	32.8206	24.5028	6.49483
ggairetrom01441	31.8428	30.737	0	0	0	2.45332
ggairetrom03548	0	0	0	1.87013	0	0.704736
gga_retrop28390	10.818	13.1244	4.96863	5.40853	6.40936	1.7094
ggairetrop06785	10.8551	10.4764	3.48995	1.52795	0.639525	4.19314
ggairetrop06424	3.20401	4.16069	9.38853	3.98704	2.01891	12.1496
ggairetrop01281	9.42257	6.09155	4.2707	5.27169	3.40128	10.2306
gga_retrop28515	0.89223	0.854431	7.04006	1.15939	1.02035	2.73275
ggairetrop05118	2.62412	2.1802	2.0584	2.98524	2.05278	10.9977
gga_retrom36736	5.19257	6.79732	10.1662	9.25762	11.6058	7.82816
gga_retrop25614	6.92054	8.87715	7.76549	9.35218	8.87178	24.5141
