# Supplementary material for: The life history of retrocopies illuminates the evolution of new mammalian genes
Source: HighWire-hosted journal article supplement (doi:10.1101/gr.198473.115), 2016-01-04
Supplement: Supplemental_Tables.zip [file Supplemental_Table_S4.xlsx]

## Sheet: Human
# Supplemental Table S4: regulation of retrocopy expression
# Promoter source for retrocopy transcripts without a CAGE-defined TSS was not determined
# The transcript start is defined by the CAGE tag [from (Forrest et al. 2014)] with the highest score mapping up to 2 kb upstream or within the retrocopy; it might therefore differ from the transcript start indicated in Supplemental Table S11
retro_ID	retro_transcript_ID	transcript_chr	transcript_start	transcript_end	transcript_strand	CAGE_tag	promoter_source
hsa_retrom34525	hsa_retrom34525.0	6	49753687	49754989	-	YES	novel
hsa_retrom34525	hsa_retrom34525.1	6	49753384	49754991	-	YES	novel
hsa_retrop13243	hsa_retrop13243.0	14	102144218	102144565	+	NO	nd
hsa_retrom01098	hsa_retrom01098.0	1	59041142	59042968	-	YES	retro_specific_CGI
hsa_retrop13823	hsa_retrop13823.0	15	60060611	60061337	+	YES	novel
hsairetrop06330	hsairetrop06330.0	11	33258549	33258946	+	NO	nd
hsa_retrop21106	hsa_retrop21106.0	19	57874852	57876637	+	YES	retro_specific_CGI
hsa_retrom08497	hsa_retrom08497.0	11	129902593	129903132	-	YES	retro_specific_CGI
hsa_retrop38049	hsa_retrop38049.0	7	63391419	63392850	+	NO	nd
hsa_retrop10420	hsa_retrop10420.0	12	64215802	64217768	+	YES	novel
hsa_retrom28363	hsa_retrom28363.0	3	93776816	93781808	-	YES	novel
hsairetrom21718	hsairetrom21718.0	2	180263935	180265257	-	YES	novel
hsairetrom39463	hsairetrom39463.1	X	102930462	102941605	-	YES	novel
hsa_retrop36763	hsa_retrop36763.1	6	74000233	74005144	+	NO	nd
hsa_retrop36763	hsa_retrop36763.0	6	73994360	74005144	+	NO	nd
hsa_retrom16583	hsa_retrom16583.0	17	61688109	61689440	-	NO	nd
hsa_retrom17205	hsa_retrom17205.0	19	2071035	2096253	-	YES	head_to_head
hsa_retrop09348	hsa_retrop09348.2	12	6982708	6994619	+	YES	novel
hsa_retrop41295	hsa_retrop41295.0	9	79013614	79014497	+	NO	nd
hsa_retrom15613	hsa_retrom15613.2	16	82031216	82045082	-	YES	novel
hsa_retrop24247	hsa_retrop24247.0	2	130986952	130990220	+	YES	parentally_inherited
hsa_retrom39356	hsa_retrom39356.0	9	27325295	27529764	-	YES	retro_specific_CGI
hsa_retrop24944	hsa_retrop24944.1	2	213695723	213698382	+	NO	nd
hsa_retrop24944	hsa_retrop24944.0	2	213695723	213698382	+	NO	nd
hsa_retrop12685	hsa_retrop12685.0	14	50359792	50363761	+	YES	retro_specific_CGI
hsa_retrom16935	hsa_retrom16935.0	18	19993615	19997889	-	NO	nd
hsa_retrom29711	hsa_retrom29711.0	4	46736887	46737255	-	NO	nd
hsa_retrom01315	hsa_retrom01315.0	1	89569559	89571822	-	NO	nd
hsa_retrom14451	hsa_retrom14451.0	15	66671304	66679090	-	YES	head_to_head
hsa_retrom41243	hsa_retrom41243.1	X	51232939	51239636	-	YES	retro_specific_CGI
hsa_retrom14115	hsa_retrom14115.0	15	35589097	35591696	-	YES	retro_specific_CGI
hsa_retrom39057	hsa_retrom39057.0	9	15527470	15527678	-	YES	novel
hsa_retrop04800	hsa_retrop04800.0	10	5566902	5567459	-	YES	novel
hsa_retrop11094	hsa_retrop11094.0	13	23489126	23493291	+	YES	retro_specific_CGI
hsa_retrom31537	hsa_retrom31537.0	5	78579904	78580568	-	YES	novel
hsa_retrop42608	hsa_retrop42608.1	X	22291014	22292567	+	NO	nd
hsa_retrom17123	hsa_retrom17123.0	18	57676886	57678383	-	NO	nd
hsa_retrop34771	hsa_retrop34771.0	5	179211058	179212365	+	NO	nd
hsa_retrop40875	hsa_retrop40875.0	9	35449720	35450666	+	NO	nd
hsa_retrom41358	hsa_retrom41358.0	X	57017278	57021458	-	YES	retro_specific_CGI
hsa_retrom41358	hsa_retrom41358.1	X	57017278	57021967	-	YES	retro_specific_CGI
hsa_retrom16120	hsa_retrom16120.0	17	17286906	17287317	-	YES	retro_specific_CGI
hsa_retrop09820	hsa_retrop09820.0	12	47610267	47630434	+	YES	novel
hsa_retrop15316	hsa_retrop15316.0	16	74701202	74702710	+	NO	nd
hsa_retrom28206	hsa_retrom28206.0	3	61728163	61728588	-	YES	retro_specific_CGI
hsa_retrop03847	hsa_retrop03847.0	1	209405388	209407488	+	YES	retro_specific_CGI
hsa_retrom10386	hsa_retrom10386.0	13	52482677	52484726	-	NO	nd
hsa_retrop11679	hsa_retrop11679.0	13	98086382	98120182	+	YES	retro_specific_CGI
hsa_retrom35901	hsa_retrom35901.0	7	38725046	38726629	-	YES	parentally_inherited
hsa_retrom04012	hsa_retrom04012.0	10	5902940	5922336	-	NO	nd
hsairetrop28971	hsairetrop28971.0	4	188924445	188925056	+	NO	nd
hsairetrom33544	hsairetrom33544.0	7	73183339	73184565	-	YES	retro_specific_CGI
hsa_retrom36148	hsa_retrom36148.0	7	66018779	66057356	-	YES	in_host
hsairetrop39424	hsairetrop39424.0	X	21874516	21876050	+	NO	nd
hsa_retrom21350	hsa_retrom21350.0	19	53792860	53794575	-	YES	retro_specific_CGI
hsa_retrop08588	hsa_retrop08588.0	11	74630576	74631269	+	NO	nd
hsa_retrom28592	hsa_retrom28592.0	3	119354458	119355112	-	YES	novel
hsa_retrop16438	hsa_retrop16438.0	17	43662330	43664586	+	YES	novel
hsa_retrop40672	hsa_retrop40672.0	9	19049411	19050972	+	YES	retro_specific_CGI
hsairetrom27743	hsairetrom27743.0	4	120329415	120331210	-	NO	nd
hsa_retrop09455	hsa_retrop09455.0	12	10658509	10660225	+	YES	novel
hsa_retrop05527	hsa_retrop05527.0	10	86320378	86320670	+	YES	novel
hsa_retrop44318	hsa_retrop44318.0	X	139173796	139175004	+	NO	nd
hsa_retrop13786	hsa_retrop13786.0	15	59499031	59500655	+	YES	novel
hsairetrom39463	hsairetrom39463.2	X	102930466	102942948	-	YES	novel
hsa_retrop34695	hsa_retrop34695.0	5	177482306	177483127	+	YES	novel
hsairetrom39463	hsairetrom39463.0	X	102930463	102941604	-	YES	novel
hsairetrop15481	hsairetrop15481.0	16	90237448	90238195	+	NO	nd
hsa_retrop11086	hsa_retrop11086.0	13	21893191	21895206	+	NO	nd
hsa_retrom30127	hsa_retrom30127.0	4	114822900	114901315	-	YES	novel
hsa_retrom30127	hsa_retrom30127.1	4	114822900	114900248	-	YES	novel
hsa_retrom14678	hsa_retrom14678.1	15	89647465	89744416	+	YES	in_host
hsa_retrom14678	hsa_retrom14678.0	15	89630821	89745505	+	YES	in_host
hsa_retrom25163	hsa_retrom25163.0	2	192745849	192746741	-	NO	nd
hsa_retrop05893	hsa_retrop05893.0	10	131904071	131906921	+	NO	nd
hsa_retrom35490	hsa_retrom35490.0	6	168687537	168689994	-	NO	nd
hsa_retrop25540	hsa_retrop25540.2	20	30897517	30919349	+	YES	novel
hsa_retrop25540	hsa_retrop25540.3	20	30865565	30920695	+	YES	retro_specific_CGI
hsa_retrop25540	hsa_retrop25540.0	20	30865566	30919097	+	YES	retro_specific_CGI
hsa_retrop25540	hsa_retrop25540.1	20	30865565	30922749	+	YES	retro_specific_CGI
hsa_retrom39881	hsa_retrom39881.0	9	69498846	69499952	-	NO	nd
hsa_retrom24685	hsa_retrom24685.0	2	132480666	132481926	-	NO	nd
hsa_retrom35513	hsa_retrom35513.0	7	4898836	4901560	-	YES	retro_specific_CGI
hsa_retrom27562	hsa_retrom27562.0	3	38568257	38569012	-	NO	nd
hsa_retrop12913	hsa_retrop12913.0	14	65007562	65009892	+	YES	retro_specific_CGI
hsa_retrop12913	hsa_retrop12913.1	14	65007360	65009897	+	YES	retro_specific_CGI
hsa_retrop43423	hsa_retrop43423.0	X	69282264	69284200	+	YES	novel
hsairetrop27282	hsairetrop27282.0	4	6717555	6719189	+	YES	retro_specific_CGI
hsa_retrom35675	hsa_retrom35675.0	7	22550230	22551558	-	YES	novel
hsa_retrop34844	hsa_retrop34844.0	6	3849634	3851483	+	YES	retro_specific_CGI
hsa_retrop34854	hsa_retrop34854.0	6	4702670	4703989	+	NO	nd
hsa_retrop34854	hsa_retrop34854.1	6	4688344	4703995	+	NO	nd
hsairetrom18830	hsairetrom18830.1	19	44931732	44952799	-	YES	retro_specific_CGI
hsa_retrop31666	hsa_retrop31666.0	4	96761274	96762599	+	YES	retro_specific_CGI
hsa_retrop05104	hsa_retrop05104.0	10	46914442	46914805	+	NO	nd
hsa_retrop44213	hsa_retrop44213.0	X	133655709	133657063	+	NO	nd
hsa_retrom38240	hsa_retrom38240.1	8	88883052	88886248	-	YES	novel
hsairetrom11641	hsairetrom11641.0	14	61744482	61748525	-	YES	novel
hsa_retrom29965	hsa_retrom29965.0	4	93742760	93744067	-	YES	parentally_inherited
hsa_retrop04145	hsa_retrop04145.0	1	236558715	236648194	+	YES	in_host
hsa_retrop16159	hsa_retrop16159.0	17	20492443	20494072	+	YES	retro_specific_CGI
hsairetrom28519	hsairetrom28519.0	5	21481352	21484100	-	NO	nd
hsa_retrom39045	hsa_retrom39045.0	9	14921703	14922183	-	YES	novel
hsa_retrop16032	hsa_retrop16032.0	17	15690212	15693715	+	YES	novel
hsa_retrop38095	hsa_retrop38095.0	7	63894140	63895801	+	YES	novel
hsairetrom27068	hsairetrom27068.1	4	47937992	48012910	-	YES	novel
hsa_retrom29909	hsa_retrom29909.0	4	80327512	80329312	-	YES	novel
hsa_retrop21972	hsa_retrop21972.0	2	70314701	70316275	+	YES	novel
hsa_retrop42310	hsa_retrop42310.0	9	128358113	128359183	+	NO	nd
hsa_retrop42371	hsa_retrop42371.0	9	135894846	135896485	+	YES	novel
hsa_retrop24414	hsa_retrop24414.0	2	132383872	132384529	+	NO	nd
hsa_retrop04054	hsa_retrop04054.0	1	228823166	228823281	+	NO	nd
hsa_retrop42889	hsa_retrop42889.0	X	44600592	44600893	+	NO	nd
hsa_retrop25100	hsa_retrop25100.0	2	233206996	233208932	+	NO	nd
hsa_retrop43557	hsa_retrop43557.1	X	73524042	73524714	+	YES	novel
hsa_retrom26906	hsa_retrom26906.0	22	22838863	22863462	-	YES	retro_specific_CGI
hsa_retrom26906	hsa_retrom26906.1	22	22838863	22863462	-	YES	retro_specific_CGI
hsa_retrop08870	hsa_retrop08870.0	11	103907373	103909448	+	YES	novel
hsa_retrop44398	hsa_retrop44398.0	X	147133704	147133985	+	YES	novel
hsa_retrop25503	hsa_retrop25503.0	20	23331466	23335382	+	YES	novel
hsa_retrop08973	hsa_retrop08973.0	11	122830654	122832742	+	NO	nd
hsa_retrom42416	hsa_retrom42416.0	X	132350841	132352355	-	YES	retro_specific_CGI
hsa_retrop10824	hsa_retrop10824.1	12	119616748	119633775	+	YES	in_host
hsa_retrom24357	hsa_retrom24357.1	2	101889329	101891869	-	YES	novel
hsa_retrom30504	hsa_retrom30504.0	4	166198968	166200801	-	NO	nd
hsa_retrop25927	hsa_retrop25927.0	21	37259022	37260184	+	NO	nd
hsa_retrop28915	hsa_retrop28915.0	3	44914817	44915505	+	NO	nd
hsairetrop40030	hsairetrop40030.0	X	57617616	57623908	+	YES	retro_specific_CGI
hsa_retrop32129	hsa_retrop32129.2	4	159193156	159200515	+	NO	nd
hsairetrom27435	hsairetrom27435.0	4	91759686	91760191	-	YES	novel
hsa_retrop38741	hsa_retrop38741.0	7	134331633	134364551	+	YES	retro_specific_CGI
hsa_retrop27767	hsa_retrop27767.0	22	32340563	32353578	+	YES	retro_specific_CGI
hsa_retrop25623	hsa_retrop25623.0	20	39825426	39825809	+	NO	nd
hsa_retrom37258	hsa_retrom37258.0	8	163326	163544	-	NO	nd
hsa_retrom08039	hsa_retrom08039.0	11	110976186	110976695	-	NO	nd
hsa_retrop18784	hsa_retrop18784.0	19	38280840	38284308	+	YES	retro_specific_CGI
hsa_retrop18784	hsa_retrop18784.1	19	38280840	38284308	+	YES	retro_specific_CGI
hsairetrom17263	hsairetrom17263.0	18	29304300	29306636	-	YES	novel
hsa_retrop43181	hsa_retrop43181.0	X	51075734	51080332	+	YES	retro_specific_CGI
hsa_retrom24569	hsa_retrom24569.0	2	130949340	130956001	-	YES	novel
hsa_retrom40913	hsa_retrom40913.0	X	36980109	36981481	-	NO	nd
hsa_retrop25874	hsa_retrop25874.0	21	20617197	20618173	+	NO	nd
hsa_retrop13991	hsa_retrop13991.0	15	79527913	79529535	+	NO	nd
hsa_retrom11329	hsa_retrom11329.0	14	59294230	59294883	-	NO	nd
hsa_retrop01729	hsa_retrop01729.0	1	96912501	96913254	+	YES	novel
hsa_retrop15796	hsa_retrop15796.0	17	2210071	2210962	+	NO	nd
hsa_retrop31308	hsa_retrop31308.0	4	47708586	47708997	+	YES	novel
hsa_retrop16508	hsa_retrop16508.0	17	51900315	51902462	+	YES	novel
hsa_retrop34768	hsa_retrop34768.0	5	179105572	179121890	+	YES	in_host
hsa_retrop34768	hsa_retrop34768.1	5	179106050	179121890	+	YES	in_host
hsa_retrop13389	hsa_retrop13389.0	15	23810861	23812902	+	YES	novel
hsa_retrop13389	hsa_retrop13389.1	15	23810861	23812902	+	YES	novel
hsa_retrop43672	hsa_retrop43672.0	X	84189137	84189887	+	YES	retro_specific_CGI
hsa_retrop43672	hsa_retrop43672.1	X	84189158	84189887	+	YES	retro_specific_CGI
hsa_retrom07773	hsa_retrom07773.0	11	77524374	77524776	-	NO	nd
hsa_retrop10816	hsa_retrop10816.0	12	117013843	117014371	+	NO	nd
hsa_retrop43189	hsa_retrop43189.0	X	51486531	51488972	+	YES	parentally_inherited
hsa_retrom28536	hsa_retrom28536.0	3	113081423	113081713	-	NO	nd
hsa_retrom40893	hsa_retrom40893.0	X	31088957	31090212	-	YES	retro_specific_CGI
hsa_retrom19225	hsa_retrom19225.0	19	42989197	42989859	-	NO	nd
hsa_retrop11144	hsa_retrop11144.0	13	25670326	25672363	+	YES	parentally_inherited
hsa_retrop42608	hsa_retrop42608.0	X	22291104	22292561	+	NO	nd
hsairetrom03253	hsairetrom03253.0	1	228611917	228613117	-	YES	retro_specific_CGI
hsa_retrop42618	hsa_retrop42618.0	X	23018068	23020876	+	YES	novel
hsa_retrop28158	hsa_retrop28158.0	3	27674432	27676319	+	YES	retro_specific_CGI
hsa_retrop28158	hsa_retrop28158.1	3	27674432	27680120	+	YES	retro_specific_CGI
hsa_retrom36198	hsa_retrom36198.0	7	75956115	75988283	-	YES	retro_specific_CGI
hsa_retrom36198	hsa_retrom36198.1	7	75956115	75988238	-	YES	retro_specific_CGI
hsa_retrom31387	hsa_retrom31387.0	5	68609250	68609664	-	NO	nd
hsa_retrom24456	hsa_retrom24456.0	2	114368078	114384660	-	NO	nd
hsairetrom19523	hsairetrom19523.1	19	58637656	58654536	-	NO	nd
hsairetrom19523	hsairetrom19523.0	19	58638890	58666451	-	YES	retro_specific_CGI
hsa_retrop42534	hsa_retrop42534.0	X	13707262	13727734	+	YES	retro_specific_CGI
hsa_retrop42534	hsa_retrop42534.1	X	13707262	13727737	+	YES	retro_specific_CGI
hsa_retrom22262	hsa_retrom22262.0	2	46739020	46747096	-	YES	novel
hsa_retrop34562	hsa_retrop34562.0	5	156277581	156278836	+	YES	retro_specific_CGI
hsairetrop29287	hsairetrop29287.0	5	34189912	34193851	+	NO	nd
hsa_retrop09153	hsa_retrop09153.1	11	124981924	124995221	+	YES	head_to_head
hsa_retrop27887	hsa_retrop27887.0	22	51222196	51238629	+	YES	head_to_head
hsa_retrop27887	hsa_retrop27887.1	22	51222197	51243280	+	YES	head_to_head
hsa_retrom28460	hsa_retrom28460.0	3	107046611	107048454	-	NO	nd
hsa_retrom20014	hsa_retrom20014.0	19	50410095	50434058	-	YES	retro_specific_CGI
hsa_retrop32274	hsa_retrop32274.0	4	183958876	183960555	+	NO	nd
hsa_retrom04803	hsa_retrom04803.0	10	82006995	82007424	-	YES	head_to_head
hsa_retrom14133	hsa_retrom14133.0	15	37091841	37110740	-	YES	novel
hsa_retrop08306	hsa_retrop08306.0	11	63010405	63012843	+	YES	novel
hsa_retrop25951	hsa_retrop25951.0	21	37504747	37505328	+	YES	novel
hsa_retrom26243	hsa_retrom26243.1	20	52491192	52492206	-	YES	retro_specific_CGI
hsairetrom10531	hsairetrom10531.0	13	64385142	64385684	-	YES	retro_specific_CGI
hsa_retrop10688	hsa_retrop10688.0	12	104697526	104698819	+	YES	retro_specific_CGI
hsa_retrom10321	hsa_retrom10321.0	13	45964490	45965400	-	YES	retro_specific_CGI
hsa_retrom42081	hsa_retrom42081.0	X	103077264	103087148	-	YES	retro_specific_CGI
hsa_retrom28984	hsa_retrom28984.0	3	156868727	156881305	-	YES	in_host
hsa_retrom31396	hsa_retrom31396.0	5	68660646	68665044	-	YES	in_host
hsa_retrom24961	hsa_retrom24961.0	2	172373746	172374110	-	YES	novel
hsa_retrom18615	hsa_retrom18615.0	19	16020259	16023465	-	YES	novel
hsa_retrom25572	hsa_retrom25572.0	2	234774157	234777032	-	YES	retro_specific_CGI
hsa_retrom04289	hsa_retrom04289.0	10	43881394	43904256	-	YES	retro_specific_CGI
hsa_retrop20291	hsa_retrop20291.0	19	53935236	53946106	+	YES	retro_specific_CGI
hsa_retrop20291	hsa_retrop20291.1	19	53943079	53946106	+	NO	nd
hsa_retrop20291	hsa_retrop20291.2	19	53944998	53946106	+	NO	nd
hsa_retrom05363	hsa_retrom05363.0	11	3848212	3862165	-	YES	retro_specific_CGI
hsa_retrom41243	hsa_retrom41243.0	X	51233968	51239636	-	YES	retro_specific_CGI
hsa_retrom30792	hsa_retrom30792.0	5	17353857	17354415	-	YES	retro_specific_CGI
hsa_retrom30792	hsa_retrom30792.1	5	17354304	17354415	+	NO	nd
hsa_retrom28393	hsa_retrom28393.0	3	94654300	94657083	-	YES	novel
hsa_retrom01308	hsa_retrom01308.0	1	89448179	89458460	-	YES	in_host
hsa_retrop29554	hsa_retrop29554.0	3	101429865	101432101	+	NO	nd
hsa_retrom10036	hsa_retrom10036.0	13	23270325	23270644	-	YES	retro_specific_CGI
hsa_retrom08913	hsa_retrom08913.0	12	31404926	31405318	-	NO	nd
hsa_retrop40929	hsa_retrop40929.0	9	37885455	37887269	+	NO	nd
hsa_retrom30145	hsa_retrom30145.1	4	118004811	118006672	-	YES	retro_specific_CGI
hsa_retrom36634	hsa_retrom36634.0	7	122341900	122342906	-	YES	novel
hsa_retrom06422	hsa_retrom06422.1	11	49454403	49455564	-	NO	nd
hsa_retrom06422	hsa_retrom06422.0	11	49454862	49455554	-	NO	nd
hsa_retrom11399	hsa_retrom11399.0	14	66479652	66480241	-	YES	novel
hsa_retrop18511	hsa_retrop18511.0	19	30526998	30529038	+	NO	nd
hsa_retrop39661	hsa_retrop39661.0	8	34731912	34732147	+	NO	nd
hsa_retrop16833	hsa_retrop16833.0	18	580399	581451	+	YES	retro_specific_CGI
hsa_retrom26428	hsa_retrom26428.0	21	30367918	30370362	-	YES	novel
hsa_retrop25796	hsa_retrop25796.0	20	62492624	62522881	+	YES	in_host
hsa_retrom32073	hsa_retrom32073.0	5	140698131	140700331	-	YES	novel
hsa_retrom30760	hsa_retrom30760.0	5	14652049	14653455	-	YES	novel
hsa_retrop40951	hsa_retrop40951.0	9	38392743	38398254	+	YES	retro_specific_CGI
hsa_retrom11235	hsa_retrom11235.0	14	47120219	47120998	-	YES	retro_specific_CGI
hsa_retrop03433	hsa_retrop03433.0	1	161576095	161577994	+	YES	retro_specific_CGI
hsa_retrop39665	hsa_retrop39665.0	8	37553275	37557526	+	YES	retro_specific_CGI
hsa_retrop34887	hsa_retrop34887.0	6	7986317	7989924	+	NO	nd
hsa_retrop29306	hsa_retrop29306.0	3	94890743	94891269	+	NO	nd
hsa_retrom16228	hsa_retrom16228.0	17	30554859	30555268	-	NO	nd
hsa_retrop14314	hsa_retrop14314.0	16	436753	437295	+	NO	nd
hsa_retrom42405	hsa_retrom42405.0	X	131337077	131352040	-	YES	novel
hsa_retrom31563	hsa_retrom31563.0	5	79627393	79628352	-	YES	retro_specific_CGI
hsa_retrom16105	hsa_retrom16105.0	17	15607549	15608185	-	NO	nd
hsa_retrop22050	hsa_retrop22050.1	2	84517809	84520694	+	YES	retro_specific_CGI
hsa_retrop22050	hsa_retrop22050.0	2	84517809	84520694	+	YES	retro_specific_CGI
hsa_retrom28645	hsa_retrom28645.0	3	128181283	128182790	-	YES	novel
hsa_retrom38978	hsa_retrom38978.0	9	6011835	6015615	-	YES	retro_specific_CGI
hsa_retrom38978	hsa_retrom38978.1	9	6011055	6015616	-	YES	retro_specific_CGI
hsa_retrop09153	hsa_retrop09153.0	11	124981924	124984849	+	YES	head_to_head
hsairetrom01971	hsairetrom01971.0	1	149398802	149400536	-	NO	nd
hsa_retrom27178	hsa_retrom27178.0	22	39516229	39516575	-	NO	nd
hsairetrop31617	hsairetrop31617.0	6	22569771	22571888	+	YES	retro_specific_CGI
hsa_retrop37891	hsa_retrop37891.0	7	44507599	44507883	+	YES	novel
hsa_retrom29346	hsa_retrom29346.0	3	196710738	196716541	-	YES	novel
hsa_retrom29895	hsa_retrom29895.0	4	80238285	80247211	-	YES	novel
hsa_retrop17190	hsa_retrop17190.0	18	54814359	54816595	+	YES	retro_specific_CGI
hsairetrop28636	hsairetrop28636.0	4	144480630	144493788	+	YES	novel
hsa_retrop25085	hsa_retrop25085.0	2	231379931	231380666	+	NO	nd
hsa_retrom27038	hsa_retrom27038.0	22	31050160	31051269	-	YES	novel
hsa_retrop17947	hsa_retrop17947.0	19	11925051	11946393	+	YES	retro_specific_CGI
hsa_retrop17947	hsa_retrop17947.1	19	11925051	11944703	+	YES	retro_specific_CGI
hsa_retrop17947	hsa_retrop17947.2	19	11940652	11946393	+	NO	nd
hsa_retrom32037	hsa_retrom32037.0	5	137086186	137090044	-	YES	retro_specific_CGI
hsa_retrom40066	hsa_retrom40066.0	9	71627438	71629004	-	YES	retro_specific_CGI
hsa_retrom15135	hsa_retrom15135.0	16	30832020	30833190	-	NO	nd
hsa_retrom42350	hsa_retrom42350.0	X	125297312	125299880	-	YES	retro_specific_CGI
hsa_retrom41451	hsa_retrom41451.0	X	62568867	62571261	-	YES	retro_specific_CGI
hsa_retrop37417	hsa_retrop37417.0	6	166478086	166478986	+	YES	novel
hsa_retrom00937	hsa_retrom00937.0	1	47073428	47079331	-	NO	nd
hsa_retrom00937	hsa_retrom00937.1	1	47073428	47082501	-	YES	retro_specific_CGI
hsa_retrop21638	hsa_retrop21638.0	2	26045175	26046317	+	YES	retro_specific_CGI
hsa_retrop43829	hsa_retrop43829.0	X	100663217	100669060	+	YES	head_to_head
hsa_retrop43829	hsa_retrop43829.1	X	100663217	100669060	+	YES	head_to_head
hsa_retrom13828	hsa_retrom13828.0	15	22015165	22016921	-	NO	nd
hsa_retrom09188	hsa_retrom09188.0	12	49296433	49297705	-	NO	nd
hsa_retrom35552	hsa_retrom35552.0	7	6530374	6532196	-	NO	nd
hsa_retrop10427	hsa_retrop10427.0	12	64784496	64790801	+	YES	head_to_head
hsa_retrop10427	hsa_retrop10427.1	12	64784496	64790801	+	YES	head_to_head
hsa_retrop16929	hsa_retrop16929.2	18	9885983	9888142	+	YES	novel
hsa_retrop16929	hsa_retrop16929.1	18	9885983	9888142	+	YES	novel
hsa_retrop16929	hsa_retrop16929.0	18	9885987	9888142	+	YES	novel
hsa_retrop34555	hsa_retrop34555.0	5	154393339	154397635	+	NO	nd
hsa_retrop21238	hsa_retrop21238.0	19	58918588	58931339	+	YES	head_to_head
hsa_retrom40349	hsa_retrom40349.0	9	104355079	104357249	-	YES	retro_specific_CGI
hsa_retrop03388	hsa_retrop03388.0	1	161494238	161496621	+	YES	retro_specific_CGI
hsa_retrom15613	hsa_retrom15613.0	16	82031216	82034536	-	NO	nd
hsa_retrop09348	hsa_retrop09348.0	12	6982707	6994620	+	YES	novel
hsa_retrop09348	hsa_retrop09348.1	12	6982708	6994619	+	YES	novel
hsa_retrom09707	hsa_retrom09707.0	12	98847971	98850879	-	YES	retro_specific_CGI
hsa_retrom11253	hsa_retrom11253.0	14	50085409	50089835	-	YES	in_host
hsa_retrop41275	hsa_retrop41275.0	9	71394995	71396238	+	YES	retro_specific_CGI
hsa_retrom09616	hsa_retrom09616.1	12	88176336	88178174	-	YES	parentally_inherited
hsairetrop37208	hsairetrop37208.0	8	125463068	125466668	+	YES	novel
hsairetrop37208	hsairetrop37208.1	8	125463068	125466668	+	YES	novel
hsa_retrop11217	hsa_retrop11217.0	13	31002110	31003828	+	YES	novel
hsa_retrop33264	hsa_retrop33264.0	5	121187598	121188514	+	YES	novel
hsa_retrom39281	hsa_retrom39281.1	9	21331041	21335369	-	YES	retro_specific_CGI
hsa_retrom35644	hsa_retrom35644.0	7	18066460	18067443	-	YES	novel
hsa_retrom30469	hsa_retrom30469.0	4	164392304	164394934	-	YES	novel
hsairetrop04798	hsairetrop04798.0	10	75491235	75492690	+	YES	novel
hsa_retrop14076	hsa_retrop14076.0	15	90808915	90821046	+	YES	in_host
hsa_retrop27853	hsa_retrop27853.1	22	41460181	41460614	+	YES	novel
hsa_retrop27853	hsa_retrop27853.0	22	41460189	41460614	+	YES	novel
hsa_retrop27853	hsa_retrop27853.2	22	41460170	41460615	+	YES	novel
hsa_retrom11245	hsa_retrom11245.0	14	50039908	50044568	-	NO	nd
hsa_retrom13826	hsa_retrom13826.0	15	21936549	21938285	-	NO	nd
hsa_retrop09436	hsa_retrop09436.0	12	9833518	9849604	+	YES	novel
hsa_retrom31238	hsa_retrom31238.0	5	55800592	55800891	-	YES	novel
hsa_retrop38607	hsa_retrop38607.0	7	107269187	107271159	+	NO	nd
hsa_retrop14545	hsa_retrop14545.0	16	3546178	3546671	+	YES	head_to_head
hsa_retrom25064	hsa_retrom25064.0	2	181737649	181738023	-	YES	retro_specific_CGI
hsa_retrom40807	hsa_retrom40807.0	X	24806705	24807097	-	NO	nd
hsa_retrop38679	hsa_retrop38679.0	7	124121015	124121612	+	NO	nd
hsa_retrop16192	hsa_retrop16192.0	17	21407893	21408273	+	NO	nd
hsa_retrom34887	hsa_retrom34887.0	6	92525291	92526246	-	NO	nd
hsa_retrom40094	hsa_retrom40094.0	9	76089335	76091150	-	NO	nd
hsa_retrom39587	hsa_retrom39587.0	9	35971377	35972039	-	YES	novel
hsa_retrom01308	hsa_retrom01308.1	1	89448179	89458460	-	YES	in_host
hsa_retrop21604	hsa_retrop21604.0	2	20646850	20649166	+	YES	retro_specific_CGI
hsa_retrom37791	hsa_retrom37791.0	8	37604083	37605541	-	YES	novel
hsa_retrom24357	hsa_retrom24357.0	2	101887739	101891869	-	YES	novel
hsa_retrom29730	hsa_retrom29730.0	4	54851318	54853544	-	NO	nd
hsa_retrop10824	hsa_retrop10824.0	12	119617067	119633770	+	YES	in_host
hsa_retrop10873	hsa_retrop10873.0	12	121352258	121352787	+	NO	nd
hsa_retrom36550	hsa_retrom36550.0	7	105222819	105223081	-	NO	nd
hsa_retrop38716	hsa_retrop38716.1	7	128766889	128767684	+	NO	nd
hsa_retrop38716	hsa_retrop38716.0	7	128766884	128767813	+	NO	nd
hsa_retrom03052	hsa_retrom03052.0	1	185302151	185304137	-	NO	nd
hsa_retrom16178	hsa_retrom16178.0	17	26603005	26634014	-	YES	retro_specific_CGI
hsa_retrom16178	hsa_retrom16178.1	17	26603002	26634365	-	YES	retro_specific_CGI
hsa_retrom04584	hsa_retrom04584.0	10	53455259	53459544	-	YES	retro_specific_CGI
hsairetrop21141	hsairetrop21141.1	2	105471900	105477432	+	YES	novel
hsa_retrom29080	hsa_retrom29080.0	3	169484847	169487787	-	YES	retro_specific_CGI
hsa_retrom32131	hsa_retrom32131.0	5	149311569	149312337	-	NO	nd
hsairetrop24010	hsairetrop24010.0	22	21044373	21046223	+	NO	nd
hsa_retrom32131	hsa_retrom32131.1	5	149311544	149312342	-	NO	nd
hsa_retrom29080	hsa_retrom29080.1	3	169483937	169487794	-	YES	retro_specific_CGI
hsa_retrop11436	hsa_retrop11436.1	13	52586524	52608235	+	YES	in_host
hsa_retrop11436	hsa_retrop11436.0	13	52586524	52608235	+	YES	in_host
hsa_retrom35444	hsa_retrom35444.0	6	160131559	160135879	-	YES	novel
hsairetrop10644	hsairetrop10644.0	13	28194510	28197552	+	YES	head_to_head
hsa_retrom32083	hsa_retrom32083.0	5	141275766	141276201	-	NO	nd
hsa_retrom29100	hsa_retrom29100.0	3	169663651	169664783	-	NO	nd
hsa_retrop05358	hsa_retrop05358.0	10	70392170	70392562	+	NO	nd
hsa_retrop11442	hsa_retrop11442.0	13	53216648	53217827	+	YES	novel
hsa_retrop37762	hsa_retrop37762.0	7	23530122	23531014	+	NO	nd
hsa_retrom41695	hsa_retrom41695.0	X	74959842	74966886	-	YES	retro_specific_CGI
hsa_retrom09624	hsa_retrom09624.0	12	89916871	89918201	-	YES	retro_specific_CGI
hsa_retrop08908	hsa_retrop08908.0	11	112088945	112089481	+	NO	nd
hsa_retrom07729	hsa_retrom07729.0	11	74456765	74457076	-	YES	novel
hsa_retrom24471	hsa_retrom24471.1	2	120974846	120980512	-	YES	retro_specific_CGI
hsa_retrom24471	hsa_retrom24471.0	2	120974846	120980987	-	YES	retro_specific_CGI
hsa_retrop25644	hsa_retrop25644.0	20	41859381	41860030	+	NO	nd
hsa_retrop10948	hsa_retrop10948.0	12	133402300	133402685	+	YES	novel
hsa_retrom42530	hsa_retrom42530.0	X	135886498	135890252	-	NO	nd
hsa_retrom15096	hsa_retrom15096.0	16	30454985	30457177	-	YES	retro_specific_CGI
hsairetrom21886	hsairetrom21886.0	2	202484959	202507383	-	YES	in_host
hsa_retrop21156	hsa_retrop21156.0	19	58378430	58379974	+	NO	nd
hsa_retrop42902	hsa_retrop42902.0	X	45590469	45591236	+	NO	nd
hsa_retrop38257	hsa_retrop38257.0	7	84613027	84613726	+	NO	nd
hsa_retrop32578	hsa_retrop32578.0	5	33162302	33162618	+	YES	novel
hsa_retrom08956	hsa_retrom08956.0	12	31944288	31945292	-	YES	retro_specific_CGI
hsa_retrom36664	hsa_retrom36664.0	7	127666946	127671679	-	YES	retro_specific_CGI
hsa_retrop13418	hsa_retrop13418.0	15	30336854	30337954	+	YES	retro_specific_CGI
hsa_retrop16108	hsa_retrop16108.0	17	19398697	19401069	+	YES	novel
hsa_retrop16108	hsa_retrop16108.1	17	19398697	19410124	+	YES	novel
hsa_retrom40921	hsa_retrom40921.0	X	37060955	37061861	-	YES	retro_specific_CGI
hsairetrop03487	hsairetrop03487.0	1	228871242	228880523	+	YES	retro_specific_CGI
hsairetrop03487	hsairetrop03487.1	1	228871242	228882395	+	YES	retro_specific_CGI
hsa_retrop16660	hsa_retrop16660.0	17	65220803	65221156	+	NO	nd
hsa_retrom28068	hsa_retrom28068.0	3	49354638	49354897	-	NO	nd
hsa_retrop21162	hsa_retrop21162.0	19	58555915	58559473	+	NO	nd
hsa_retrop21162	hsa_retrop21162.1	19	58555915	58563996	+	NO	nd
hsa_retrom41384	hsa_retrom41384.0	X	57146130	57147966	-	YES	novel
hsa_retrom32294	hsa_retrom32294.0	5	177612444	177614377	-	YES	retro_specific_CGI
hsa_retrop09498	hsa_retrop09498.0	12	13154615	13157807	+	YES	head_to_head
hsa_retrop12739	hsa_retrop12739.0	14	55765623	55766034	+	NO	nd
hsa_retrom36036	hsa_retrom36036.0	7	56636290	56636627	-	NO	nd
hsairetrom16610	hsairetrom16610.0	17	59667802	59668530	-	YES	novel
hsa_retrom37967	hsa_retrom37967.0	8	57389401	57390656	-	YES	novel
hsa_retrop31280	hsa_retrop31280.0	4	41983788	41988414	+	YES	novel
hsa_retrop03757	hsa_retrop03757.0	1	201487412	201489776	+	NO	nd
hsa_retrop03757	hsa_retrop03757.1	1	201487412	201490650	+	NO	nd
hsa_retrop03757	hsa_retrop03757.2	1	201487412	201499443	+	NO	nd
hsa_retrop31404	hsa_retrop31404.0	4	66439293	66439656	+	NO	nd
hsa_retrom28434	hsa_retrom28434.0	3	101295293	101296519	-	YES	novel
hsairetrom26653	hsairetrom26653.0	3	197307095	197309294	-	NO	nd
hsa_retrom14185	hsa_retrom14185.0	15	41164412	41166031	-	YES	retro_specific_CGI
hsa_retrom14185	hsa_retrom14185.1	15	41164412	41166521	-	YES	retro_specific_CGI
hsairetrop40022	hsairetrop40022.1	X	56589613	56593933	+	YES	retro_specific_CGI
hsa_retrom00812	hsa_retrom00812.0	1	40235223	40236860	-	NO	nd
hsa_retrop25238	hsa_retrop25238.0	20	4004563	4005077	+	YES	novel
hsairetrom23993	hsairetrom23993.0	22	21479379	21482357	-	NO	nd
hsa_retrop16833	hsa_retrop16833.1	18	580505	581430	+	YES	retro_specific_CGI
hsa_retrop37919	hsa_retrop37919.0	7	48964220	48967049	+	YES	retro_specific_CGI
hsa_retrom32068	hsa_retrom32068.0	5	140682237	140683674	-	YES	retro_specific_CGI
hsa_retrom15569	hsa_retrom15569.0	16	76268445	76269582	-	YES	novel
hsairetrop24499	hsairetrop24499.0	22	23412571	23467204	+	YES	retro_specific_CGI
hsa_retrom27210	hsa_retrom27210.0	22	41257065	41258337	-	YES	novel
hsa_retrom10489	hsa_retrom10489.0	13	75812048	75813308	-	NO	nd
hsa_retrop00372	hsa_retrop00372.0	1	27189655	27190467	+	YES	novel
hsa_retrop06662	hsa_retrop06662.0	11	9681972	9682223	+	NO	nd
hsa_retrop02787	hsa_retrop02787.0	1	146649481	146651390	+	YES	retro_specific_CGI
hsa_retrop37247	hsa_retrop37247.0	6	143663501	143664827	+	NO	nd
hsa_retrom01069	hsa_retrom01069.0	1	53903752	53904517	-	YES	retro_specific_CGI
hsa_retrom19154	hsa_retrom19154.0	19	38187328	38188648	-	NO	nd
hsa_retrom35690	hsa_retrom35690.0	7	23623065	23626137	-	YES	novel
hsairetrom37529	hsairetrom37529.0	9	95597995	95600415	-	YES	retro_specific_CGI
hsa_retrom42356	hsa_retrom42356.0	X	125684987	125686454	-	YES	retro_specific_CGI
hsa_retrop16218	hsa_retrop16218.0	17	26794935	26795455	+	YES	novel
hsa_retrom36070	hsa_retrom36070.0	7	62809534	62810425	-	NO	nd
hsa_retrop25310	hsa_retrop25310.0	20	14738380	14738571	+	NO	nd
hsa_retrop36749	hsa_retrop36749.0	6	72294395	72295698	+	YES	retro_specific_CGI
hsa_retrom18761	hsa_retrom18761.0	19	29281776	29283278	-	NO	nd
hsa_retrop06597	hsa_retrop06597.0	11	7110208	7113038	+	YES	retro_specific_CGI
hsa_retrop34597	hsa_retrop34597.0	5	167956607	167957617	+	YES	retro_specific_CGI
hsa_retrop16950	hsa_retrop16950.0	18	11851421	11852735	+	YES	retro_specific_CGI
hsa_retrom40747	hsa_retrom40747.1	X	13336778	13338233	-	YES	novel
hsa_retrom40747	hsa_retrom40747.0	X	13336778	13337678	-	YES	novel
hsa_retrop03315	hsa_retrop03315.0	1	160639936	160641253	+	NO	nd
hsa_retrop12751	hsa_retrop12751.0	14	56233102	56233921	+	YES	novel
hsa_retrom15543	hsa_retrom15543.0	16	73974495	73975248	-	NO	nd
hsa_retrop05507	hsa_retrop05507.0	10	81272388	81276349	+	YES	novel
hsairetrom39463	hsairetrom39463.3	X	102930463	102942948	-	YES	novel
hsa_retrom16660	hsa_retrom16660.0	17	66127474	66132546	-	NO	nd
hsa_retrom30179	hsa_retrom30179.1	4	120314356	120316752	-	YES	novel
hsa_retrop01785	hsa_retrop01785.0	1	104112241	104113312	+	NO	nd
hsa_retrop36942	hsa_retrop36942.0	6	100023545	100024353	+	NO	nd
hsa_retrom04888	hsa_retrom04888.0	10	95717949	95721259	-	NO	nd
hsairetrop34028	hsairetrop34028.0	7	12510880	12512186	+	YES	retro_specific_CGI

## Sheet: Mouse
# Supplemental Table S4: regulation of retrocopy expression
# Promoter source for retrocopy transcripts without a CAGE-defined TSS was not determined (nd)
# The transcript start is defined by the CAGE tag [from (Forrest et al. 2014)] with the highest score mapping up to 2 kb upstream or within the retrocopy; it might therefore differ from the transcript start indicated in Supplemental Table S11
retro_ID	retro_transcript_ID	transcript_chr	transcript_start	transcript_end	transcript_strand	H3K4me3_peak	CAGE_tag	promoter_source
musiretrop03405	musiretrop03405.1	18	46757738	46769750	+	YES	YES	head_to_head
musiretrop03405	musiretrop03405.0	18	46757371	46769750	+	YES	YES	head_to_head
mus_retrop54112	mus_retrop54112.0	12	70473136	70476954	+	YES	YES	novel
musiretrom28650	musiretrom28650.0	5	43354323	43356554	-	NO	NO	nd
mus_retrom72264	mus_retrom72264.0	8	59998705	59999694	-	NO	NO	nd
mus_retrom98064	mus_retrom98064.0	4	25468930	25469728	-	NO	NO	nd
mus_retrom69040	mus_retrom69040.0	10	18022322	18022934	-	NO	NO	nd
mus_retrop50323	mus_retrop50323.0	15	91648472	91654202	+	NO	NO	nd
mus_retrop100947	mus_retrop100947.1	X	98963911	98964256	+	NO	NO	nd
mus_retrop100947	mus_retrop100947.0	X	98963975	98964254	+	NO	NO	nd
mus_retrop52425	mus_retrop52425.0	13	67911137	67912184	+	NO	YES	novel
mus_retrom66654	mus_retrom66654.1	9	109731867	109735186	-	YES	YES	head_to_head
mus_retrop70565	mus_retrop70565.0	10	61533871	61534994	+	NO	YES	novel
mus_retrop51853	mus_retrop51853.0	13	24411969	24413059	+	NO	NO	nd
mus_retrop98169	mus_retrop98169.0	X	5624839	5631846	+	NO	NO	nd
mus_retrom72520	mus_retrom72520.0	8	81029208	81032757	-	YES	YES	head_to_head
mus_retrom106218	mus_retrom106218.0	X	75900922	75902059	-	NO	NO	nd
mus_retrop93365	mus_retrop93365.0	4	39397362	39398800	+	YES	YES	novel
mus_retrom50516	mus_retrom50516.0	12	71021494	71022136	-	NO	NO	nd
mus_retrop44349	mus_retrop44349.0	19	30078287	30080485	+	YES	YES	novel
mus_retrom40956	mus_retrom40956.0	19	56827624	56835028	-	NO	NO	nd
mus_retrop91832	mus_retrop91832.0	5	24151279	24154675	+	YES	YES	novel
mus_retrop66346	mus_retrop66346.0	9	122850761	122851832	+	NO	NO	nd
mus_retrop49814	mus_retrop49814.0	15	40369109	40370133	+	YES	NO	nd
mus_retrop73764	mus_retrop73764.0	8	69035640	69043082	+	YES	YES	retro_specific_CGI
mus_retrom79905	mus_retrom79905.0	6	96114573	96116209	-	YES	YES	novel
mus_retrom49633	mus_retrom49633.0	12	8504475	8506803	-	YES	YES	retro_specific_CGI
mus_retrop45787	mus_retrop45787.0	18	48206402	48208021	+	YES	YES	novel
mus_retrom122983	mus_retrom122983.0	2	121226968	121227134	-	NO	NO	nd
mus_retrom98121	mus_retrom98121.1	4	34336208	34429998	-	NO	NO	nd
mus_retrom98121	mus_retrom98121.0	4	34336203	34349588	-	NO	NO	nd
mus_retrop106918	mus_retrop106918.0	2	87366369	87366688	+	NO	YES	novel
mus_retrom50556	mus_retrom50556.0	12	72947665	72948044	-	NO	NO	nd
mus_retrom97091	mus_retrom97091.0	5	109957262	109959150	-	NO	YES	novel
mus_retrom97091	mus_retrom97091.1	5	109957290	109975405	-	NO	NO	nd
mus_retrop104327	mus_retrop104327.0	2	80132641	80135015	+	YES	YES	novel
mus_retrop114215	mus_retrop114215.0	1	152981764	152992978	+	YES	YES	novel
mus_retrop112192	mus_retrop112192.0	2	148498394	148501757	+	YES	YES	retro_specific_CGI
mus_retrom125011	mus_retrom125011.0	1	177614724	177618693	-	NO	NO	nd
mus_retrop112296	mus_retrop112296.0	2	152512934	152513303	+	YES	YES	retro_specific_CGI
mus_retrop50305	mus_retrop50305.0	15	90713138	90713681	+	NO	NO	nd
mus_retrop54498	mus_retrop54498.1	12	107696654	107697738	+	NO	YES	novel
mus_retrop79653	mus_retrop79653.0	6	148303185	148304109	+	YES	YES	retro_specific_CGI
mus_retrop52192	mus_retrop52192.0	13	64611246	64612633	+	NO	YES	parentally_inherited
mus_retrom105261	mus_retrom105261.1	X	42139752	42143349	-	YES	YES	retro_specific_CGI
mus_retrom101392	mus_retrom101392.0	3	95214305	95214885	-	YES	NO	nd
mus_retrop92564	mus_retrop92564.1	5	107860571	107863476	+	YES	YES	novel
mus_retrop92564	mus_retrop92564.0	5	107860571	107863476	+	YES	YES	novel
musiretrom01651	musiretrom01651.0	NT_161902	397624	399546	-	NO	NO	nd
musiretrom03012	musiretrom03012.0	19	24550631	24551768	-	YES	YES	retro_specific_CGI
mus_retrom108053	mus_retrom108053.0	X	160198103	160199239	-	YES	YES	novel
mus_retrop48690	mus_retrop48690.2	16	22053758	22055846	+	YES	YES	parentally_inherited
mus_retrop100929	mus_retrop100929.0	X	97532620	97534265	+	YES	NO	nd
mus_retrop48690	mus_retrop48690.0	16	22053760	22054199	+	YES	YES	parentally_inherited
mus_retrop48690	mus_retrop48690.1	16	22053773	22054856	+	YES	YES	parentally_inherited
mus_retrom66171	mus_retrom66171.0	9	71446710	71448333	-	NO	NO	nd
mus_retrop99884	mus_retrop99884.1	X	33291574	33342474	+	NO	NO	nd
mus_retrop99884	mus_retrop99884.0	X	33291574	33342474	+	NO	NO	nd
musiretrom34407	musiretrom34407.0	X	7615937	7616132	-	NO	YES	novel
mus_retrop44438	mus_retrop44438.0	19	40356669	40356947	+	NO	NO	nd
mus_retrom41057	mus_retrom41057.0	18	9618795	9619436	-	YES	YES	retro_specific_CGI
mus_retrop58124	mus_retrop58124.0	11	94603330	94604226	+	YES	NO	nd
mus_retrom66280	mus_retrom66280.0	9	75541566	75541861	-	NO	NO	nd
mus_retrop46229	mus_retrop46229.0	18	80403581	80409458	+	YES	YES	in_host
mus_retrom47016	mus_retrom47016.1	13	21592897	21593135	-	NO	NO	nd
mus_retrom123890	mus_retrom123890.0	1	16759190	16760208	-	NO	YES	novel
musiretrom38462	musiretrom38462.0	2	119094980	119103704	-	YES	YES	retro_specific_CGI
mus_retrop44896	mus_retrop44896.0	18	35696290	35696525	+	NO	YES	novel
mus_retrop44896	mus_retrop44896.1	18	35696251	35696526	+	NO	YES	novel
mus_retrom98541	mus_retrom98541.0	4	49691645	49694869	-	YES	YES	retro_specific_CGI
mus_retrop111983	mus_retrop111983.0	2	130707049	130707833	+	NO	NO	nd
mus_retrop100263	mus_retrop100263.0	X	57801194	57802346	+	YES	NO	nd
mus_retrop101198	mus_retrop101198.0	X	117228476	117229440	+	NO	NO	nd
mus_retrop79355	mus_retrop79355.0	6	117947116	117948026	+	YES	YES	retro_specific_CGI
mus_retrom72028	mus_retrom72028.0	8	41939519	41940643	-	NO	YES	novel
musiretrom14733	musiretrom14733.2	11	61302347	61307722	-	YES	YES	retro_specific_CGI
musiretrom14733	musiretrom14733.0	11	61302347	61306912	-	YES	YES	retro_specific_CGI
musiretrom14733	musiretrom14733.1	11	61302344	61307728	-	YES	YES	retro_specific_CGI
musiretrop40316	musiretrop40316.0	1	78654099	78664148	+	YES	YES	in_host
musiretrop31812	musiretrop31812.0	4	3185653	3186325	+	NO	NO	nd
mus_retrom105504	mus_retrom105504.0	X	57298226	57299531	-	NO	NO	nd
mus_retrop50179	mus_retrop50179.0	15	81810981	81811980	+	YES	YES	retro_specific_CGI
mus_retrop114705	mus_retrop114705.1	1	188791019	188794754	+	YES	YES	novel
musiretrom35009	musiretrom35009.0	X	162919781	162921854	-	YES	YES	novel
mus_retrom41029	mus_retrom41029.0	18	4198225	4198497	-	NO	NO	nd
mus_retrop87027	mus_retrop87027.1	7	75763311	75764881	+	YES	YES	novel
mus_retrop87027	mus_retrop87027.0	7	75763311	75764881	+	YES	YES	novel
musiretrom41448	musiretrom41448.0	1	32575024	32578029	-	NO	NO	nd
mus_retrop56403	mus_retrop56403.0	11	56272967	56273571	+	NO	NO	nd
mus_retrom60084	mus_retrom60084.0	11	63125880	63126709	-	NO	YES	novel
mus_retrom46277	mus_retrom46277.1	15	75796070	75799433	-	YES	NO	nd
mus_retrom42748	mus_retrom42748.0	17	35093447	35096171	-	YES	YES	retro_specific_CGI
musiretrom35383	musiretrom35383.0	X	123347016	123350365	-	NO	NO	nd
mus_retrop86910	mus_retrop86910.0	7	57854570	57855833	+	YES	YES	novel
mus_retrom69830	mus_retrom69830.0	10	84560492	84565210	-	YES	YES	head_to_head
mus_retrom69093	mus_retrom69093.1	10	21784980	21788274	-	NO	YES	novel
mus_retrop98666	mus_retrop98666.0	X	22038792	22039489	+	YES	YES	novel
mus_retrop100933	mus_retrop100933.0	X	97624104	97625509	+	YES	YES	novel
mus_retrom58907	mus_retrom58907.0	11	28239131	28239873	-	YES	NO	nd
musiretrop12558	musiretrop12558.0	11	76031153	76032157	+	YES	YES	novel
mus_retrom109173	mus_retrom109173.0	2	78685295	78686182	-	YES	NO	nd
mus_retrop101009	mus_retrop101009.0	X	100724954	100725995	+	YES	NO	nd
musiretrom12912	musiretrom12912.0	11	58322380	58322682	-	NO	NO	nd
mus_retrom108094	mus_retrom108094.0	X	166214153	166217537	-	NO	YES	novel
mus_retrop97067	mus_retrop97067.0	3	135146399	135147107	+	NO	NO	nd
mus_retrop96190	mus_retrop96190.0	3	85718642	85718980	+	NO	YES	novel
musiretrom36000	musiretrom36000.0	X	76876531	76876859	-	NO	NO	nd
mus_retrom65903	mus_retrom65903.0	9	58993692	58993912	-	NO	NO	nd
mus_retrom80040	mus_retrom80040.0	6	116145457	116145704	-	NO	NO	nd
mus_retrop49162	mus_retrop49162.0	16	53984071	53986074	+	NO	NO	nd
mus_retrom102194	mus_retrom102194.0	3	144086897	144233162	-	YES	YES	in_host
mus_retrom45861	mus_retrom45861.0	15	25769847	25770259	-	YES	NO	nd
mus_retrom45861	mus_retrom45861.1	15	25769847	25771339	-	YES	NO	nd
mus_retrom46474	mus_retrom46474.0	15	81237565	81238684	-	YES	YES	novel
mus_retrop100454	mus_retrop100454.0	X	71506420	71506883	+	NO	YES	novel
musiretrop24940	musiretrop24940.0	6	117856829	117875571	+	YES	YES	novel
musiretrop24940	musiretrop24940.1	6	117857147	117875571	+	YES	YES	novel
mus_retrom59169	mus_retrom59169.0	11	48758983	48759351	-	NO	YES	novel
musiretrop34558	musiretrop34558.0	X	132528374	132529877	+	NO	NO	nd
mus_retrom68920	mus_retrom68920.2	14	120418888	120441657	-	NO	YES	in_host
mus_retrom125188	mus_retrom125188.0	1	193897635	193898256	-	NO	YES	novel
mus_retrom62633	mus_retrom62633.0	9	19732348	19732728	-	NO	YES	novel
mus_retrom38162	mus_retrom38162.0	Y	605007	605395	-	NO	YES	novel
mus_retrop45861	mus_retrop45861.0	18	52491194	52492602	+	YES	YES	retro_specific_CGI
musiretrom15167	musiretrom15167.0	9	6265187	6266528	-	YES	YES	novel
musiretrom15167	musiretrom15167.1	9	6265051	6266532	-	YES	YES	novel
mus_retrop56772	mus_retrop56772.0	11	62462228	62479849	+	YES	YES	head_to_head
mus_retrop56772	mus_retrop56772.1	11	62462228	62479848	+	YES	YES	head_to_head
mus_retrom69328	mus_retrom69328.0	10	33528471	33529148	-	NO	NO	nd
mus_retrop49028	mus_retrop49028.0	16	45204300	45216961	+	NO	NO	nd
mus_retrom80165	mus_retrom80165.0	6	127232118	127232421	-	NO	NO	nd
mus_retrom109227	mus_retrom109227.0	2	83193582	83193978	-	NO	YES	novel
mus_retrom95856	mus_retrom95856.0	7	138757172	138758704	-	NO	NO	nd
mus_retrop76105	mus_retrop76105.0	6	67155684	67156067	+	NO	NO	nd
mus_retrom73131	mus_retrom73131.0	6	8545737	8546987	-	NO	NO	nd
musiretrom13595	musiretrom13595.0	11	78564013	78565164	-	YES	YES	retro_specific_CGI
mus_retrom46464	mus_retrom46464.0	15	80058192	80060562	-	YES	YES	novel
mus_retrom46295	mus_retrom46295.0	15	76353088	76358382	-	NO	YES	novel
mus_retrom50287	mus_retrom50287.0	12	55802307	55802669	-	NO	YES	novel
musiretrop33087	musiretrop33087.0	3	115641927	115710282	-	YES	YES	in_host
musiretrop34559	musiretrop34559.0	X	132567926	132569368	+	YES	NO	nd
mus_retrom79842	mus_retrom79842.0	6	92515205	92515824	-	YES	NO	nd
mus_retrop52130	mus_retrop52130.0	13	59788812	59795466	-	YES	YES	in_host
mus_retrop52130	mus_retrop52130.1	13	59788812	59795466	-	YES	YES	in_host
mus_retrop52130	mus_retrop52130.2	13	59788812	59795466	-	YES	YES	in_host
mus_retrop52130	mus_retrop52130.3	13	59788812	59795466	-	YES	YES	in_host
mus_retrop100895	mus_retrop100895.1	X	91881428	91884596	+	YES	YES	retro_specific_CGI
mus_retrop54154	mus_retrop54154.0	12	77505235	77507886	+	YES	YES	novel
mus_retrop110694	mus_retrop110694.0	2	92401321	92402598	+	NO	NO	nd
mus_retrom43775	mus_retrom43775.0	17	65986930	65991516	-	YES	YES	novel
mus_retrop91832	mus_retrop91832.1	5	24151279	24154675	+	YES	YES	novel
mus_retrom68722	mus_retrom68722.1	14	94284915	94286748	-	YES	NO	nd
mus_retrom68722	mus_retrom68722.2	14	94284064	94289886	-	YES	YES	retro_specific_CGI
musiretrop42304	musiretrop42304.0	1	173433611	173434850	+	YES	YES	novel
mus_retrop113876	mus_retrop113876.0	1	100354865	100355609	+	NO	NO	nd
mus_retrom42758	mus_retrom42758.0	17	35107162	35108963	-	YES	YES	retro_specific_CGI
musiretrom21215	musiretrom21215.2	8	120185314	120197559	-	YES	YES	retro_specific_CGI
musiretrom21215	musiretrom21215.1	8	120185314	120197559	-	YES	YES	retro_specific_CGI
musiretrom22766	musiretrom22766.0	6	23598882	23600247	-	YES	YES	novel
mus_retrop96033	mus_retrop96033.0	3	65417517	65419983	+	NO	NO	nd
mus_retrop73113	mus_retrop73113.0	8	3583806	3584164	-	NO	NO	nd
mus_retrop73113	mus_retrop73113.1	8	3583807	3584060	-	NO	NO	nd
mus_retrop73113	mus_retrop73113.2	8	3583807	3584060	-	NO	NO	nd
musiretrom15952	musiretrom15952.0	9	123598560	123599371	-	NO	NO	nd
mus_retrom63020	mus_retrom63020.0	9	35089119	35089307	-	NO	NO	nd
mus_retrop54426	mus_retrop54426.0	12	102383740	102387917	+	YES	NO	nd
mus_retrop69578	mus_retrop69578.0	14	78860890	78861940	+	YES	YES	retro_specific_CGI
mus_retrop79686	mus_retrop79686.0	7	3181345	3181882	+	NO	YES	novel
mus_retrop91705	mus_retrop91705.0	5	7179641	7180639	+	NO	YES	novel
mus_retrom109068	mus_retrom109068.2	2	70456597	70458673	-	YES	NO	nd
mus_retrom97507	mus_retrom97507.0	5	136384289	136410447	-	YES	YES	novel
mus_retrom49232	mus_retrom49232.0	13	98530276	98530523	-	NO	YES	novel
mus_retrom49232	mus_retrom49232.1	13	98530185	98530425	-	NO	YES	novel
musiretrom22353	musiretrom22353.0	6	128152725	128152906	-	NO	NO	nd
mus_retrom62921	mus_retrom62921.0	9	21338115	21338465	-	NO	NO	nd
mus_retrom103412	mus_retrom103412.2	X	5748985	5750113	-	YES	NO	nd
musiretrop30459	musiretrop30459.0	4	86221592	86223164	+	YES	YES	retro_specific_CGI
mus_retrom102170	mus_retrom102170.0	3	140873314	140874765	-	YES	YES	retro_specific_CGI
mus_retrom106418	mus_retrom106418.0	X	86649292	86651966	-	NO	NO	nd
mus_retrop92162	mus_retrop92162.0	5	73771603	73783957	+	YES	YES	novel
musiretrom10607	musiretrom10607.0	12	96152212	96154583	-	NO	NO	nd
mus_retrom124016	mus_retrom124016.0	1	37544004	37545478	-	YES	YES	novel
mus_retrom59026	mus_retrom59026.0	11	35608503	35612332	-	YES	YES	retro_specific_CGI
mus_retrop113816	mus_retrop113816.0	1	97395218	97395773	+	NO	YES	novel
mus_retrom80307	mus_retrom80307.0	6	133881896	133882344	-	NO	NO	nd
musiretrop01983	musiretrop01983.0	NT_161937	1398588	1399018	+	NO	NO	nd
mus_retrop58257	mus_retrop58257.0	11	100104574	100104673	+	NO	YES	novel
mus_retrom72849	mus_retrom72849.0	8	100088231	100090969	-	NO	NO	nd
mus_retrop46022	mus_retrop46022.0	18	64447643	64448441	+	YES	YES	novel
mus_retrom96895	mus_retrom96895.0	5	97884205	97885989	-	YES	YES	novel
mus_retrop70539	mus_retrop70539.1	10	57909428	57956927	+	YES	YES	retro_specific_CGI
mus_retrop66231	mus_retrop66231.0	9	108062447	108063483	+	NO	NO	nd
mus_retrom43877	mus_retrom43877.0	17	79248356	79269872	-	NO	NO	nd
mus_retrom91966	mus_retrom91966.1	7	109796171	109796676	-	NO	NO	nd
mus_retrom103568	mus_retrom103568.0	X	14687750	14688518	-	YES	YES	novel
mus_retrop76052	mus_retrop76052.0	6	65902606	65903986	+	YES	YES	novel
mus_retrom106245	mus_retrom106245.0	X	77147724	77149047	-	NO	NO	nd
mus_retrom125095	mus_retrom125095.0	1	182257160	182260670	-	YES	NO	nd
musiretrom10233	musiretrom10233.0	13	98228153	98228504	-	NO	NO	nd
mus_retrop44918	mus_retrop44918.0	18	37080283	37081970	+	NO	NO	nd
mus_retrom124055	mus_retrom124055.0	1	45914285	45914577	-	NO	NO	nd
mus_retrop93339	mus_retrop93339.0	4	33051750	33051992	+	NO	YES	retro_specific_CGI
mus_retrom50460	mus_retrom50460.0	12	67384376	67385374	-	YES	YES	retro_specific_CGI
mus_retrop93743	mus_retrop93743.0	4	45811955	45817445	+	YES	YES	retro_specific_CGI
mus_retrop101671	mus_retrop101671.0	X	133634040	133635328	+	NO	NO	nd
mus_retrom79661	mus_retrom79661.0	6	86474507	86475994	-	YES	YES	novel
mus_retrom80362	mus_retrom80362.0	6	138605639	138607164	-	YES	YES	retro_specific_CGI
mus_retrom42691	mus_retrom42691.0	17	33201060	33204978	-	YES	YES	novel
mus_retrom96493	mus_retrom96493.0	5	38966022	38967232	+	YES	NO	nd
mus_retrom100745	mus_retrom100745.0	3	65312468	65333322	-	YES	YES	novel
mus_retrop101159	mus_retrop101159.0	X	112018590	112019543	+	NO	YES	novel
mus_retrom65939	mus_retrom65939.0	9	62689425	62689755	-	NO	NO	nd
mus_retrop70222	mus_retrop70222.0	10	24971519	24972212	+	NO	NO	nd
mus_retrop102165	mus_retrop102165.2	X	150266640	150268766	+	YES	YES	novel
mus_retrop102165	mus_retrop102165.1	X	150266640	150268766	+	YES	YES	novel
mus_retrop102165	mus_retrop102165.0	X	150266640	150268763	+	YES	YES	novel
musiretrom03116	musiretrom03116.0	18	37800659	37803795	-	YES	YES	retro_specific_CGI
mus_retrop98507	mus_retrop98507.0	X	12229053	12229930	+	YES	YES	retro_specific_CGI
mus_retrop91945	mus_retrop91945.0	5	33361625	33370603	+	YES	YES	novel
mus_retrop52885	mus_retrop52885.1	13	101421606	101425967	+	YES	YES	in_host
mus_retrop52885	mus_retrop52885.0	13	101421337	101425972	+	YES	YES	in_host
mus_retrop44823	mus_retrop44823.0	18	23375491	23376660	+	YES	YES	parentally_inherited
mus_retrop52885	mus_retrop52885.2	13	101421672	101425967	+	YES	YES	in_host
mus_retrom42080	mus_retrom42080.0	17	6131695	6132604	-	NO	NO	nd
mus_retrop114141	mus_retrop114141.0	1	141532704	141533988	+	NO	NO	nd
mus_retrom106866	mus_retrom106866.0	X	102920418	102920805	-	NO	NO	nd
mus_retrom46694	mus_retrom46694.0	13	3116154	3139398	-	YES	NO	nd
mus_retrom81987	mus_retrom81987.1	7	11241655	11242300	-	NO	YES	novel
mus_retrom81987	mus_retrom81987.0	7	11241912	11242299	-	NO	YES	novel
mus_retrom123526	mus_retrom123526.0	2	166325618	166331086	-	NO	NO	nd
mus_retrom123526	mus_retrom123526.1	2	166325618	166344182	-	NO	NO	nd
musiretrop30598	musiretrop30598.0	4	37917484	37919452	+	NO	YES	novel
musiretrop30598	musiretrop30598.1	4	37917484	37920668	+	NO	YES	novel
musiretrop30598	musiretrop30598.2	4	37917484	37920606	+	NO	YES	novel
mus_retrop100895	mus_retrop100895.2	X	91881426	91888546	+	YES	YES	retro_specific_CGI
mus_retrom45850	mus_retrom45850.0	15	19384455	19385993	-	NO	NO	nd
mus_retrop46040	mus_retrop46040.0	18	67365083	67366294	+	YES	YES	retro_specific_CGI
mus_retrom40704	mus_retrom40704.0	19	29048835	29050365	-	YES	YES	parentally_inherited
mus_retrop95957	mus_retrop95957.0	3	59235619	59237134	+	YES	YES	novel
mus_retrop53141	mus_retrop53141.0	12	12918843	12919177	+	YES	NO	nd
mus_retrom103643	mus_retrom103643.2	X	23534779	23572789	-	NO	NO	nd
mus_retrom103643	mus_retrom103643.3	X	23534779	23597387	-	NO	NO	nd
mus_retrom103643	mus_retrom103643.0	X	23534779	23569004	-	NO	NO	nd
mus_retrom103643	mus_retrom103643.1	X	23534779	23536059	-	NO	NO	nd
mus_retrom124477	mus_retrom124477.0	1	90100089	90102303	-	YES	YES	retro_specific_CGI
mus_retrop48457	mus_retrop48457.1	16	4229198	4231189	+	YES	NO	nd
mus_retrop48457	mus_retrop48457.0	16	4229207	4231187	+	YES	NO	nd
mus_retrom46200	mus_retrom46200.0	15	62049174	62050989	-	YES	YES	parentally_inherited
mus_retrom65981	mus_retrom65981.0	9	66653159	66653648	-	YES	NO	nd
mus_retrom100047	mus_retrom100047.0	4	147195684	147222687	-	YES	YES	novel
mus_retrom96504	mus_retrom96504.0	5	39727980	39730108	-	YES	YES	novel
mus_retrom79426	mus_retrom79426.0	6	73418580	73419625	-	YES	YES	novel
mus_retrom66654	mus_retrom66654.0	9	109731867	109734268	-	YES	YES	head_to_head
mus_retrop42196	mus_retrop42196.0	19	3205861	3206266	+	YES	YES	retro_specific_CGI
musiretrom30803	musiretrom30803.0	4	97187991	97188925	-	NO	YES	novel
mus_retrom65810	mus_retrom65810.0	9	51808933	51856946	-	YES	YES	novel
mus_retrop101172	mus_retrop101172.0	X	112021173	112022101	+	YES	YES	novel
mus_retrom69486	mus_retrom69486.0	10	62884017	62884423	-	NO	NO	nd
mus_retrom48516	mus_retrom48516.0	13	47104632	47106309	-	NO	YES	retro_specific_CGI
mus_retrop48947	mus_retrop48947.0	16	37869041	37888928	+	YES	YES	in_host
mus_retrop73543	mus_retrop73543.0	8	43332268	43332934	+	NO	YES	novel
mus_retrom46277	mus_retrom46277.0	15	75794426	75799433	-	YES	NO	nd
mus_retrop112711	mus_retrop112711.0	1	4600518	4601477	+	YES	NO	nd
mus_retrop44762	mus_retrop44762.0	18	15991307	15991801	+	NO	YES	novel
mus_retrop44762	mus_retrop44762.1	18	15991308	15991794	+	NO	YES	novel
mus_retrom90885	mus_retrom90885.0	7	48921742	48923499	-	YES	NO	nd
mus_retrom96889	mus_retrom96889.0	5	97811261	97821358	-	YES	YES	retro_specific_CGI
mus_retrom69527	mus_retrom69527.1	10	71442374	71443432	-	YES	YES	novel
mus_retrom69527	mus_retrom69527.0	10	71442793	71443432	-	YES	YES	novel
mus_retrom45856	mus_retrom45856.0	15	24652977	24654566	-	YES	YES	parentally_inherited
mus_retrop52410	mus_retrop52410.0	13	67759682	67765130	+	NO	NO	nd
mus_retrom40716	mus_retrom40716.0	19	29788913	29887940	-	YES	YES	retro_specific_CGI
mus_retrom40716	mus_retrom40716.1	19	29882716	29887939	-	YES	YES	retro_specific_CGI
mus_retrop74711	mus_retrop74711.0	6	34426338	34455118	+	YES	YES	retro_specific_CGI
mus_retrom107434	mus_retrom107434.0	X	133392692	133403098	-	YES	YES	retro_specific_CGI
mus_retrop58367	mus_retrop58367.0	11	110927486	110938064	+	YES	YES	retro_specific_CGI
mus_retrop114296	mus_retrop114296.0	1	158296211	158296658	+	NO	YES	novel
mus_retrom43922	mus_retrom43922.0	17	87343472	87347220	-	YES	YES	novel
mus_retrop49855	mus_retrop49855.0	15	51920892	51921268	+	NO	NO	nd
mus_retrom42415	mus_retrom42415.0	17	22104721	22104961	-	NO	NO	nd
mus_retrom97643	mus_retrom97643.0	5	143001844	143005950	-	YES	YES	retro_specific_CGI
mus_retrom91497	mus_retrom91497.0	7	88367444	88367689	-	NO	YES	novel
mus_retrop96242	mus_retrop96242.0	3	88233078	88233345	+	NO	NO	nd
musiretrom07320	musiretrom07320.0	15	63322372	63324462	-	YES	NO	nd
mus_retrop74490	mus_retrop74490.0	8	127289284	127289854	+	YES	NO	nd
mus_retrom123574	mus_retrom123574.0	2	170289154	170289501	-	NO	NO	nd
mus_retrom98017	mus_retrom98017.0	4	12058559	12060408	-	NO	NO	nd
mus_retrom70053	mus_retrom70053.0	10	115548772	115551287	-	YES	YES	retro_specific_CGI
mus_retrop53990	mus_retrop53990.0	12	58331477	58342726	+	YES	YES	retro_specific_CGI
mus_retrom90946	mus_retrom90946.0	7	49380638	49381552	-	NO	NO	nd
mus_retrom80325	mus_retrom80325.0	6	135259177	135260354	-	YES	YES	retro_specific_CGI
mus_retrop73440	mus_retrop73440.0	8	34594687	34595587	+	YES	YES	novel
mus_retrop48834	mus_retrop48834.2	16	32408492	32409220	+	NO	NO	nd
mus_retrom71748	mus_retrom71748.0	8	13746496	13747415	-	NO	NO	nd
mus_retrom42086	mus_retrom42086.0	17	6492278	6493279	-	NO	NO	nd
mus_retrop100895	mus_retrop100895.0	X	91881428	91883847	+	YES	YES	retro_specific_CGI
mus_retrop48516	mus_retrop48516.0	16	10798008	10803336	+	YES	NO	nd
mus_retrop112996	mus_retrop112996.0	1	31279673	31280970	+	YES	YES	head_to_head
mus_retrop101570	mus_retrop101570.0	X	131135785	131141558	+	YES	YES	head_to_head
mus_retrop101570	mus_retrop101570.1	X	131135785	131141559	+	YES	YES	head_to_head
mus_retrom80331	mus_retrom80331.0	6	135299495	135299694	-	NO	YES	novel
mus_retrom50089	mus_retrom50089.1	12	25322895	25323798	-	NO	YES	novel
mus_retrom45852	mus_retrom45852.0	15	20595328	20596502	-	NO	YES	novel
mus_retrom45852	mus_retrom45852.1	15	20594994	20596503	-	NO	YES	novel
musiretrom22866	musiretrom22866.0	6	67484123	67485799	-	YES	YES	retro_specific_CGI
mus_retrop92122	mus_retrop92122.1	5	62200064	62202703	+	YES	NO	nd
mus_retrop92122	mus_retrop92122.0	5	62198067	62202704	+	NO	YES	novel
mus_retrop79606	mus_retrop79606.0	6	145214857	145215297	+	NO	NO	nd
mus_retrom59282	mus_retrom59282.0	11	51498922	51502540	-	YES	YES	retro_specific_CGI
mus_retrop113304	mus_retrop113304.0	1	55392354	55392718	+	NO	NO	nd
mus_retrop102426	mus_retrop102426.0	2	21989498	21990708	+	NO	NO	nd
mus_retrom58817	mus_retrom58817.0	11	17874201	17874460	-	NO	NO	nd
mus_retrop114730	mus_retrop114730.0	1	194714704	194715288	+	NO	NO	nd
mus_retrom66136	mus_retrom66136.0	9	67595960	67596749	-	NO	NO	nd
mus_retrop96971	mus_retrop96971.0	3	124023985	124025822	+	YES	YES	retro_specific_CGI
musiretrom01640	musiretrom01640.0	NT_161902	202741	203590	-	NO	NO	nd
mus_retrop87352	mus_retrop87352.0	7	96756398	96757066	+	NO	NO	nd
mus_retrom72920	mus_retrom72920.0	8	109096854	109097214	-	NO	YES	retro_specific_CGI
mus_retrop51942	mus_retrop51942.0	13	34826715	34839438	+	YES	YES	novel
mus_retrop51942	mus_retrop51942.1	13	34831518	34839438	+	NO	YES	novel
mus_retrop92527	mus_retrop92527.0	5	104937405	104983206	+	YES	YES	retro_specific_CGI
mus_retrop92527	mus_retrop92527.1	5	104937402	104980159	+	YES	YES	retro_specific_CGI
musiretrop37999	musiretrop37999.0	2	153117236	153159060	+	YES	YES	retro_specific_CGI
mus_retrom98840	mus_retrom98840.0	4	72511418	72513642	-	YES	YES	novel
musiretrop37999	musiretrop37999.2	2	153141952	153159060	+	NO	NO	nd
musiretrop34975	musiretrop34975.0	X	124909948	124911769	+	NO	YES	novel
mus_retrop59824	mus_retrop59824.0	9	37504200	37504568	+	NO	NO	nd
mus_retrop65784	mus_retrop65784.0	9	57331735	57332383	+	NO	NO	nd
mus_retrop101020	mus_retrop101020.0	X	100825971	100826964	+	YES	YES	novel
mus_retrom96027	mus_retrom96027.1	7	148363948	148380128	-	YES	YES	in_host
mus_retrom80482	mus_retrom80482.0	7	5076579	5077538	-	YES	YES	novel
musiretrom36849	musiretrom36849.0	X	133267504	133275799	-	YES	YES	head_to_head
musiretrom36849	musiretrom36849.1	X	133267503	133275799	-	YES	YES	head_to_head
mus_retrom40738	mus_retrom40738.0	19	30613448	30614054	-	YES	YES	retro_specific_CGI
mus_retrom103643	mus_retrom103643.4	X	23534779	23614775	-	NO	NO	nd
mus_retrom90513	mus_retrom90513.0	7	25118097	25118977	-	YES	YES	novel
mus_retrom71756	mus_retrom71756.0	8	13835246	13838477	-	NO	YES	novel
mus_retrop89795	mus_retrop89795.0	7	114352610	114354427	+	YES	YES	retro_specific_CGI
mus_retrop54074	mus_retrop54074.1	12	66326558	66329409	+	YES	YES	novel
mus_retrop48572	mus_retrop48572.0	16	16274513	16276076	+	NO	NO	nd
mus_retrop69629	mus_retrop69629.0	14	95818979	95821030	+	NO	NO	nd
mus_retrom58893	mus_retrom58893.2	11	22657406	22675029	-	NO	NO	nd
mus_retrop95965	mus_retrop95965.0	3	59571601	59572121	+	NO	NO	nd
mus_retrop47110	mus_retrop47110.0	17	37311858	37315118	+	NO	YES	novel
mus_retrom97471	mus_retrom97471.0	5	135421145	135422781	-	YES	YES	novel
mus_retrop45870	mus_retrop45870.0	18	52853380	52855195	+	YES	YES	novel
mus_retrop79610	mus_retrop79610.0	6	145336127	145340716	+	YES	YES	novel
mus_retrom69970	mus_retrom69970.1	10	99219165	99222249	-	YES	YES	retro_specific_CGI
mus_retrom66895	mus_retrom66895.0	14	12113514	12114380	-	NO	NO	nd
mus_retrop78825	mus_retrop78825.0	6	88172595	88173148	-	YES	NO	nd
mus_retrop89328	mus_retrop89328.0	7	111969742	111970761	+	NO	NO	nd
musiretrom31734	musiretrom31734.0	4	122999126	123000849	-	YES	YES	retro_specific_CGI
mus_retrop52568	mus_retrop52568.0	13	75782345	75782678	+	NO	YES	novel
mus_retrop47027	mus_retrop47027.0	17	35113917	35115697	-	YES	NO	nd
mus_retrom69408	mus_retrom69408.1	10	43887219	43890138	-	YES	YES	novel
mus_retrom69408	mus_retrom69408.0	10	43881191	43890138	-	YES	YES	novel
mus_retrom69408	mus_retrom69408.2	10	43888071	43890140	-	YES	YES	novel
mus_retrom45624	mus_retrom45624.0	16	88682308	88682795	-	NO	NO	nd
mus_retrom123369	mus_retrom123369.1	2	156819231	156832796	-	YES	YES	in_host
mus_retrom123369	mus_retrom123369.0	2	156819227	156832158	-	YES	YES	in_host
mus_retrop95424	mus_retrop95424.0	3	8214777	8216145	+	YES	NO	nd
mus_retrom100950	mus_retrom100950.0	3	88380343	88380974	-	YES	NO	nd
mus_retrop69581	mus_retrop69581.0	14	79103370	79104929	+	YES	YES	novel
mus_retrom72362	mus_retrom72362.0	8	72534473	72534772	-	NO	NO	nd
mus_retrop98672	mus_retrop98672.0	X	23459673	23484676	+	NO	NO	nd
mus_retrom50669	mus_retrom50669.0	12	85599300	85599592	-	YES	NO	nd
mus_retrop73537	mus_retrop73537.0	8	41940307	41941719	+	NO	NO	nd
mus_retrom97984	mus_retrom97984.0	4	9843519	9844538	-	NO	YES	parentally_inherited
mus_retrom46431	mus_retrom46431.0	15	78383617	78385607	-	YES	NO	nd
mus_retrom97605	mus_retrom97605.0	5	138805927	138806775	-	YES	YES	novel
mus_retrom43546	mus_retrom43546.0	17	40343998	40345528	-	YES	YES	novel
mus_retrom100454	mus_retrom100454.0	3	33903938	33904219	-	NO	YES	novel
musiretrop37452	musiretrop37452.0	2	151284726	151285961	+	NO	YES	novel
mus_retrop101951	mus_retrop101951.0	X	148999438	149000516	+	NO	NO	nd
mus_retrom100617	mus_retrom100617.0	3	48409712	48413011	-	YES	YES	retro_specific_CGI
mus_retrom69436	mus_retrom69436.0	10	52262069	52265601	-	YES	NO	nd
mus_retrom97130	mus_retrom97130.0	5	115553224	115553534	-	NO	YES	novel
mus_retrom58893	mus_retrom58893.1	11	22657406	22662711	-	YES	NO	nd
mus_retrom58893	mus_retrom58893.0	11	22657406	22660065	-	NO	NO	nd
mus_retrom97130	mus_retrom97130.1	5	115553187	115553534	-	NO	YES	novel
mus_retrom100537	mus_retrom100537.1	3	40704152	40706420	-	NO	NO	nd
mus_retrom100537	mus_retrom100537.0	3	40704160	40706418	-	NO	NO	nd
mus_retrom96741	mus_retrom96741.0	5	87798844	87799260	-	NO	NO	nd
mus_retrom45614	mus_retrom45614.0	16	87549296	87553640	-	YES	YES	in_host
mus_retrom73305	mus_retrom73305.0	6	39792617	39794359	-	YES	YES	novel
musiretrop13650	musiretrop13650.0	11	58775115	58786507	+	YES	YES	in_host
mus_retrop78757	mus_retrop78757.1	6	85026304	85030417	+	YES	YES	novel
mus_retrop78757	mus_retrop78757.0	6	85026305	85026722	+	YES	YES	novel
mus_retrop53855	mus_retrop53855.0	12	35669461	35671056	+	YES	YES	novel
mus_retrop104198	mus_retrop104198.0	2	70297088	70297614	+	NO	YES	novel
musiretrom28926	musiretrom28926.0	5	71834145	71939453	-	YES	YES	novel
mus_retrop70265	mus_retrop70265.0	10	28749933	28751486	+	NO	YES	novel
mus_retrop101970	mus_retrop101970.0	X	149932746	149936072	+	YES	YES	retro_specific_CGI
mus_retrop69399	mus_retrop69399.0	14	57409455	57424912	-	NO	NO	nd
mus_retrop71221	mus_retrop71221.0	10	82329388	82330653	+	YES	YES	novel
mus_retrom100099	mus_retrom100099.0	4	154040567	154041962	-	YES	YES	novel
mus_retrom100099	mus_retrom100099.1	4	154040572	154041798	-	YES	YES	novel
mus_retrop53974	mus_retrop53974.0	12	56666216	56667800	+	YES	YES	retro_specific_CGI
mus_retrom47016	mus_retrom47016.0	13	21592897	21593283	-	NO	NO	nd
mus_retrom98128	mus_retrom98128.0	4	34888164	34888553	-	NO	NO	nd
mus_retrom96093	mus_retrom96093.0	5	5781563	5783595	-	NO	YES	novel
musiretrop01980	musiretrop01980.0	NT_161937	982723	983103	+	NO	NO	nd
mus_retrom99232	mus_retrom99232.0	4	99096931	99097261	-	NO	NO	nd
mus_retrom108019	mus_retrom108019.0	X	154088572	154089292	-	NO	NO	nd
mus_retrom100533	mus_retrom100533.0	3	40656859	40659194	-	NO	NO	nd
mus_retrom121805	mus_retrom121805.0	2	104554073	104556291	-	YES	NO	nd
mus_retrom121805	mus_retrom121805.1	2	104554071	104557495	-	YES	NO	nd
mus_retrop100234	mus_retrop100234.0	X	53701141	53701502	+	NO	NO	nd
mus_retrop65764	mus_retrop65764.0	9	56285576	56286021	+	YES	YES	novel
mus_retrop65595	mus_retrop65595.0	9	39857969	39864449	+	NO	YES	novel
mus_retrop95696	mus_retrop95696.0	3	22424265	22424616	+	NO	NO	nd
musiretrop08845	musiretrop08845.0	15	58704213	58709331	+	YES	YES	retro_specific_CGI
mus_retrop114307	mus_retrop114307.0	1	159342768	159350352	+	YES	YES	head_to_head
mus_retrom72410	mus_retrom72410.1	8	74806536	74809112	-	YES	YES	novel
mus_retrom123903	mus_retrom123903.0	1	19143520	19144023	-	NO	NO	nd
mus_retrom95429	mus_retrom95429.0	7	121352220	121352496	-	NO	NO	nd
mus_retrom106435	mus_retrom106435.0	X	87662113	87664961	-	NO	NO	nd
mus_retrom123929	mus_retrom123929.0	1	23107362	23109060	-	YES	YES	retro_specific_CGI
mus_retrom66621	mus_retrom66621.0	9	107194722	107195605	-	NO	NO	nd
mus_retrom43596	mus_retrom43596.0	17	47175329	47180012	-	NO	NO	nd
mus_retrom48384	mus_retrom48384.0	13	33212768	33213220	-	YES	NO	nd
mus_retrom48647	mus_retrom48647.0	13	59801514	59812585	-	YES	NO	nd
mus_retrop53075	mus_retrop53075.0	12	4789025	4790196	+	NO	YES	novel
musiretrop01978	musiretrop01978.0	NT_161937	825629	826001	+	NO	NO	nd
musiretrop37999	musiretrop37999.1	2	153141952	153159060	+	NO	NO	nd
musiretrop22468	musiretrop22468.0	8	3994629	3997435	+	YES	YES	retro_specific_CGI
mus_retrop97126	mus_retrop97126.0	3	142193320	142213100	+	YES	YES	in_host
mus_retrom41298	mus_retrom41298.0	18	37797047	37798367	-	YES	YES	retro_specific_CGI
mus_retrom42065	mus_retrom42065.0	17	5417344	5418697	-	YES	YES	retro_specific_CGI
mus_retrop65763	mus_retrop65763.0	9	55875360	55878529	+	YES	YES	novel
mus_retrom109003	mus_retrom109003.0	2	59936259	59936827	-	YES	YES	novel
mus_retrom68920	mus_retrom68920.1	14	120418888	120441657	-	NO	YES	in_host
mus_retrom68920	mus_retrom68920.0	14	120418888	120431385	-	NO	NO	nd
mus_retrop55007	mus_retrop55007.0	11	22872027	22874840	+	YES	YES	novel
mus_retrom42698	mus_retrom42698.0	17	33272585	33279043	-	NO	YES	retro_specific_CGI
mus_retrom50401	mus_retrom50401.0	12	62454957	62455733	-	NO	NO	nd
mus_retrom46702	mus_retrom46702.0	13	3802562	3803832	-	YES	YES	novel
mus_retrom105261	mus_retrom105261.0	X	42139752	42142015	-	YES	YES	retro_specific_CGI
mus_retrop49046	mus_retrop49046.0	16	48072377	48074571	+	NO	NO	nd
mus_retrom72410	mus_retrom72410.0	8	74804027	74809108	-	YES	YES	novel
mus_retrom69414	mus_retrom69414.0	10	48812823	48816494	-	NO	NO	nd
mus_retrop70634	mus_retrop70634.0	10	74441534	74479649	+	NO	YES	novel
mus_retrop101532	mus_retrop101532.0	X	124796274	124797555	+	NO	YES	novel
mus_retrop74421	mus_retrop74421.0	8	112968393	112971416	+	NO	YES	in_host
mus_retrom58620	mus_retrom58620.0	11	3370915	3371175	-	NO	YES	novel
musiretrom03954	musiretrom03954.0	18	46624602	46625447	-	YES	YES	novel
mus_retrop46022	mus_retrop46022.1	18	64447589	64451376	+	YES	YES	novel
mus_retrop92578	mus_retrop92578.0	5	108259200	108260734	+	YES	YES	retro_specific_CGI
musiretrom09420	musiretrom09420.0	13	23852564	23854363	-	YES	YES	head_to_head
mus_retrom61496	mus_retrom61496.0	11	81386064	81387068	-	YES	YES	retro_specific_CGI
mus_retrop45643	mus_retrop45643.0	18	39933211	39935987	+	YES	YES	retro_specific_CGI
mus_retrop85572	mus_retrop85572.0	7	31494907	31495309	+	NO	NO	nd
mus_retrom69060	mus_retrom69060.0	10	20084520	20085599	-	NO	YES	novel
musiretrop30372	musiretrop30372.0	5	147889109	147890620	+	YES	YES	head_to_head
mus_retrop44234	mus_retrop44234.0	19	18001593	18002073	+	NO	YES	novel
mus_retrop74329	mus_retrop74329.0	8	98157318	98168827	+	YES	YES	retro_specific_CGI
mus_retrop74329	mus_retrop74329.1	8	98166959	98168827	+	NO	NO	nd
musiretrom21215	musiretrom21215.0	8	120185312	120195591	-	YES	YES	retro_specific_CGI
mus_retrom69416	mus_retrom69416.0	10	51475988	51476998	-	YES	YES	novel
mus_retrom69416	mus_retrom69416.1	10	51475987	51476999	-	YES	YES	novel
mus_retrom59418	mus_retrom59418.0	11	54931617	54932137	-	NO	YES	novel
musiretrom28553	musiretrom28553.0	5	126327386	126330265	-	YES	YES	novel
mus_retrom97891	mus_retrom97891.0	4	4454948	4456826	-	YES	YES	novel
mus_retrom97891	mus_retrom97891.1	4	4454949	4456826	-	YES	YES	novel
mus_retrom96027	mus_retrom96027.0	7	148363948	148380128	-	YES	YES	in_host
mus_retrop54782	mus_retrop54782.0	11	3851931	3852191	+	NO	NO	nd
mus_retrom69014	mus_retrom69014.0	10	13610432	13611080	-	NO	NO	nd
mus_retrop49028	mus_retrop49028.1	16	45204300	45216961	+	NO	NO	nd
mus_retrop74359	mus_retrop74359.1	8	103159988	103163389	+	NO	NO	nd
mus_retrop112192	mus_retrop112192.1	2	148498394	148501757	+	YES	YES	retro_specific_CGI
mus_retrop74746	mus_retrop74746.0	6	37491311	37491931	+	NO	YES	novel
musiretrop13198	musiretrop13198.0	11	85998964	85999249	+	NO	NO	nd
mus_retrop86720	mus_retrop86720.0	7	37019501	37020240	+	NO	YES	novel
mus_retrop113049	mus_retrop113049.0	1	37317461	37318967	+	YES	NO	nd
mus_retrop95424	mus_retrop95424.1	3	8214777	8223825	+	YES	NO	nd
musiretrom41190	musiretrom41190.0	1	32599486	32604209	-	NO	NO	nd
mus_retrop100839	mus_retrop100839.2	X	86997603	87000806	+	NO	NO	nd
mus_retrop100839	mus_retrop100839.1	X	86997603	87000806	+	NO	NO	nd
mus_retrop100839	mus_retrop100839.0	X	86898361	87000806	+	NO	YES	novel
mus_retrop94954	mus_retrop94954.0	4	122793515	122795227	+	YES	YES	retro_specific_CGI
musiretrop34327	musiretrop34327.0	X	12514054	12515614	+	YES	YES	retro_specific_CGI
mus_retrom103412	mus_retrom103412.0	X	5745877	5750113	-	YES	NO	nd
mus_retrom103412	mus_retrom103412.1	X	5745875	5750113	-	YES	NO	nd
mus_retrom50473	mus_retrom50473.0	12	70283747	70285011	-	YES	YES	head_to_head
mus_retrom72807	mus_retrom72807.0	8	99952061	99953098	-	YES	YES	novel
musiretrom03960	musiretrom03960.0	18	50727482	50728305	-	YES	YES	novel
mus_retrop70610	mus_retrop70610.0	10	70945744	70946295	+	YES	NO	nd
mus_retrop79467	mus_retrop79467.0	6	128422983	128424158	+	NO	NO	nd
mus_retrom71816	mus_retrom71816.0	8	29193261	29196035	-	YES	NO	nd
mus_retrom42194	mus_retrom42194.0	17	9859420	9862522	-	YES	YES	retro_specific_CGI
mus_retrop103919	mus_retrop103919.0	2	40411325	40412633	+	NO	YES	novel
mus_retrom91238	mus_retrom91238.0	7	66091853	66092938	-	NO	NO	nd
musiretrop19621	musiretrop19621.0	10	55803655	55836670	+	YES	YES	retro_specific_CGI
mus_retrop94036	mus_retrop94036.0	4	82840263	82840721	+	NO	NO	nd
musiretrop19621	musiretrop19621.1	10	55834659	55836670	+	YES	YES	retro_specific_CGI
mus_retrop65646	mus_retrop65646.0	9	43023688	43026145	+	NO	NO	nd
mus_retrop95814	mus_retrop95814.0	3	37633675	37634014	+	NO	NO	nd
mus_retrom44511	mus_retrom44511.0	16	31376886	31379623	-	NO	NO	nd
mus_retrop52552	mus_retrop52552.0	13	74670838	74672023	+	NO	NO	nd
mus_retrop70539	mus_retrop70539.0	10	57909426	57957625	+	YES	YES	retro_specific_CGI
mus_retrop70539	mus_retrop70539.2	10	57909428	57956730	+	YES	YES	retro_specific_CGI
mus_retrop114001	mus_retrop114001.1	1	121418892	121424835	+	NO	YES	retro_specific_CGI
mus_retrop78965	mus_retrop78965.0	6	90855712	90856483	+	YES	NO	nd
mus_retrom50572	mus_retrom50572.0	12	74644449	74647402	-	YES	YES	retro_specific_CGI
