# Supplementary material for: The life history of retrocopies illuminates the evolution of new mammalian genes
Source: HighWire-hosted journal article supplement (doi:10.1101/gr.198473.115), 2016-01-04
Supplement: Supplemental_Tables.zip [file Supplemental_Table_S5.xlsx]

## Sheet: Human
# Supplemental Table S5: motif enrichment analysis in human expressed retrocopies
# The 2 kb upstream of all expressed retrocopies were analysed for motif enrichment by comparing them with the 2 kb upstream of not expressed retrocopies
Motif Name	Consensus	P-value	Log P-value	q-value (Benjamini)	# of Target Sequences with Motif(of 248)	% of Target Sequences with Motif	# of Background Sequences with Motif(of 4001)	% of Background Sequences with Motif
NRF(NRF)/Promoter/Homer	STGCGCATGCGC	1e-07	-17.42	0	47	0.1703	270.9	0.068
Sp1(Zf)/Promoter/Homer	GGCCCCGCCCCC	1e-06	-16	0	90	0.3261	750.1	0.1884
NRF1(NRF)/MCF7-NRF1-ChIP-Seq(Unpublished)/Homer	CTGCGCATGCGC	1e-06	-14.3	0.0001	38	0.1377	217.4	0.0546
Egr2(Zf)/Thymocytes-Egr2-ChIP-Seq(GSE34254)/Homer	NGCGTGGGCGGR	1e-05	-12.51	0.0003	45	0.163	305.4	0.0767
DPL-1(E2F)/cElegans-Adult-ChIP-Seq(modEncode)/Homer	TAGCGCGC	1e-05	-11.84	0.0005	108	0.3913	1056.3	0.2653
Maz(Zf)/HepG2-Maz-ChIP-Seq(GSE31477)/Homer	GGGGGGGG	0.0001	-11.48	0.0006	179	0.6486	2052.6	0.5154
E2F4(E2F)/K562-E2F4-ChIP-Seq(GSE31477)/Homer	GGCGGGAAAH	0.0001	-10.38	0.0014	95	0.3442	924.5	0.2322
SeqBias: CG-repeat	CGCGCGCGCG	0.001	-9.091	0.0045	173	0.6268	2034.5	0.5109
Elk4(ETS)/Hela-Elk4-ChIP-Seq(GSE31477)/Homer	NRYTTCCGGY	0.001	-8.574	0.0067	114	0.413	1220.4	0.3065
FHY3(FAR1)/Arabidopsis-FHY3-ChIP-Seq(GSE30711)/Homer	HHCACGCGCBTN	0.001	-8.498	0.0067	60	0.2174	537.6	0.135
E2F6(E2F)/Hela-E2F6-ChIP-Seq(GSE31477)/Homer	GGCGGGAARN	0.001	-8.29	0.0073	107	0.3877	1135.7	0.2852
ELF1(ETS)/Jurkat-ELF1-ChIP-Seq(SRA014231)/Homer	AVCCGGAAGT	0.001	-7.941	0.0095	109	0.3949	1172.6	0.2945
Egr1(Zf)/K562-Egr1-ChIP-Seq(GSE32465)/Homer	TGCGTGGGYG	0.001	-7.645	0.0118	106	0.3841	1141.5	0.2867
GFX(?)/Promoter/Homer	ATTCTCGCGAGA	0.001	-7.422	0.0137	8	0.029	23	0.0058
ZBTB33(Zf)/GM12878-ZBTB33-ChIP-Seq(GSE32465)/Homer	GGVTCTCGCGAGAAC	0.01	-6.871	0.0222	12	0.0435	55.6	0.014
MYB(HTH)/ERMYB-Myb-ChIPSeq(GSE22095)/Homer	GGCVGTTR	0.01	-6.839	0.0222	236	0.8551	3095.4	0.7773
E2F1(E2F)/Hela-E2F1-ChIP-Seq(GSE22478)/Homer	CWGGCGGGAA	0.01	-6.438	0.0302	60	0.2174	585.6	0.147
Elk1(ETS)/Hela-Elk1-ChIP-Seq(GSE31477)/Homer	HACTTCCGGY	0.01	-6.378	0.0303	113	0.4094	1277.5	0.3208
Stat3(Stat)/mES-Stat3-ChIP-Seq(GSE11431)/Homer	CTTCCGGGAA	0.01	-6.344	0.0303	111	0.4022	1251.2	0.3142
ETS(ETS)/Promoter/Homer	AACCGGAAGT	0.01	-6.138	0.0346	75	0.2717	782.3	0.1964
EBF1(EBF)/Near-E2A-ChIP-Seq(GSE21512)/Homer	GTCCCCWGGGGA	0.01	-6.078	0.035	148	0.5362	1777.1	0.4463
Rfx2(HTH)/LoVo-RFX2-ChIP-Seq(GSE49402)/Homer	GTTGCCATGGCAACM	0.01	-6.003	0.036	21	0.0761	147	0.0369
Bcl6(Zf)/Liver-Bcl6-ChIP-Seq(GSE31578)/Homer	NNNCTTTCCAGGAAA	0.01	-5.247	0.0735	209	0.7572	2719.5	0.6829
RFX(HTH)/K562-RFX3-ChIP-Seq(SRA012198)/Homer	CGGTTGCCATGGCAAC	0.01	-5.161	0.0767	18	0.0652	128.4	0.0322
ETV1(ETS)/GIST48-ETV1-ChIP-Seq(GSE22441)/Homer	AACCGGAAGT	0.01	-5.128	0.0767	199	0.721	2570.6	0.6455
Hoxb4(Homeobox)/ES-Hoxb4-ChIP-Seq(GSE34014)/Homer	TGATTRATGGCY	0.01	-4.988	0.0842	55	0.1993	563.1	0.1414
BMYB(HTH)/Hela-BMYB-ChIP-Seq(GSE27030)/Homer	NHAACBGYYV	0.01	-4.948	0.0844	222	0.8043	2935.7	0.7372
GATA:SCL(Zf,bHLH)/Ter119-SCL-ChIP-Seq(GSE18720)/Homer	CRGCTGBNGNSNNSAGATAA	0.01	-4.91	0.0845	33	0.1196	298.5	0.075
Tcfcp2l1(CP2)/mES-Tcfcp2l1-ChIP-Seq(GSE11431)/Homer	NRAACCRGTTYRAACCRGYT	0.01	-4.878	0.0845	30	0.1087	264.5	0.0664
NFAT(RHD)/Jurkat-NFATC1-ChIP-Seq(Jolma et al.)/Homer	ATTTTCCATT	0.01	-4.683	0.0989	188	0.6812	2423.8	0.6087
GFY-Staf(?,Zf)/Promoter/Homer	RACTACAATTCCCAGAAKGC	0.1	-4.605	0.1036	14	0.0507	95.2	0.0239
Znf263(Zf)/K562-Znf263-ChIP-Seq(GSE31477)/Homer	CVGTSCTCCC	0.1	-4.578	0.1036	223	0.808	2966.6	0.745
Pbx3(Homeobox)/GM12878-PBX3-ChIP-Seq(GSE32465)/Homer	SCTGTCAMTCAN	0.1	-4.553	0.1036	56	0.2029	589	0.1479
BORIS(Zf)/K562-CTCFL-ChIP-Seq(GSE32465)/Homer	CNNBRGCGCCCCCTGSTGGC	0.1	-4.503	0.1046	43	0.1558	428	0.1075
X-box(HTH)/NPC-H3K4me1-ChIP-Seq(GSE16256)/Homer	GGTTGCCATGGCAA	0.1	-4.471	0.1048	24	0.087	204	0.0512
ETS1(ETS)/Jurkat-ETS1-ChIP-Seq(GSE17954)/Homer	ACAGGAAGTG	0.1	-4.358	0.1142	164	0.5942	2083.9	0.5233
Unknown4/Drosophila-Promoters/Homer	AAAAATACCRMA	0.1	-4.321	0.1153	59	0.2138	635.9	0.1597
Unknown3/Arabidopsis-Promoters/Homer	AYTAAACCGG	0.1	-4.213	0.125	39	0.1413	387.8	0.0974
HRE(HSF)/HepG2-HSF1-ChIP-Seq(GSE31477)/Homer	BSTTCTRGAABVTTCYAGAA	0.1	-4.07	0.1405	32	0.1159	306.4	0.077
KLF5(Zf)/LoVo-KLF5-ChIP-Seq(GSE49402)/Homer	DGGGYGKGGC	0.1	-4.023	0.1437	199	0.721	2620.2	0.658
Bach2(bZIP)/OCILy7-Bach2-ChIP-Seq(GSE44420)/Homer	TGCTGAGTCA	0.1	-3.885	0.1609	38	0.1377	384.3	0.0965
ABF1/SacCer-Promoters/Homer	CGTRNAAARTGA	0.1	-3.81	0.1692	40	0.1449	411.4	0.1033
Fli1(ETS)/CD8-FLI-ChIP-Seq(GSE20898)/Homer	NRYTTCCGGH	0.1	-3.732	0.1787	168	0.6087	2173.3	0.5458
c-Myc(bHLH)/LNCAP-cMyc-ChIP-Seq(Unpublished)/Homer	VCCACGTG	0.1	-3.585	0.2024	73	0.2645	847.6	0.2128
GABPA(ETS)/Jurkat-GABPa-ChIP-Seq(GSE17954)/Homer	RACCGGAAGT	0.1	-3.584	0.2024	147	0.5326	1876.5	0.4712
LIN-39(Homeobox)/cElegans.L3-LIN39-ChIP-Seq(modEncode)/Homer	ATGATTRATG	0.1	-3.531	0.2042	222	0.8043	2997.2	0.7527
ERG(ETS)/VCaP-ERG-ChIP-Seq(GSE14097)/Homer	ACAGGAAGTG	0.1	-3.478	0.2107	208	0.7536	2784.4	0.6992
ELT-3(Gata)/cElegans-L1-ELT3-ChIP-Seq(modEncode)/Homer	AWTGATAAGA	0.1	-3.464	0.2107	126	0.4565	1583.2	0.3976
NF-E2(bZIP)/K562-NFE2-ChIP-Seq(GSE31477)/Homer	GATGACTCAGCA	0.1	-3.441	0.2107	14	0.0507	112.4	0.0282
PQM-1(?)/cElegans-L3-ChIP-Seq(modEncode)/Homer	ACTGATAAGA	0.1	-3.436	0.2107	108	0.3913	1332.7	0.3347
PU.1(ETS)/ThioMac-PU.1-ChIP-Seq(GSE21512)/Homer	AGAGGAAGTG	0.1	-3.39	0.2121	97	0.3514	1182.5	0.297
Stat3+il21(Stat)/CD4-Stat3-ChIP-Seq(GSE19198)/Homer	SVYTTCCNGGAARB	0.1	-3.35	0.2167	135	0.4891	1717.6	0.4313
n-Myc(bHLH)/mES-nMyc-ChIP-Seq(GSE11431)/Homer	VRCCACGTGG	0.1	-3.307	0.2219	105	0.3804	1297.5	0.3258
Gata2(Zf)/K562-GATA2-ChIP-Seq(GSE18829)/Homer	BBCTTATCTS	0.1	-3.259	0.2285	147	0.5326	1894.8	0.4758
AMYB(HTH)/Testes-AMYB-ChIP-Seq(GSE44588)/Homer	TGGCAGTTGG	0.1	-3.228	0.2314	215	0.779	2904.6	0.7294
Rbpj1(?)/Panc1-Rbpj1-ChIP-Seq(GSE47459)/Homer	HTTTCCCASG	0.1	-3.172	0.2402	212	0.7681	2861.1	0.7185
Pitx1(Homeobox)/Chicken-Pitx1-ChIP-Seq(GSE38910)/Homer	TAATCCCN	0.1	-3.1	0.2538	276	1	3936.8	0.9886
HOXA9(Homeobox)/HSC-Hoxa9-ChIP-Seq(GSE33509)/Homer	GGCCATAAATCA	0.1	-3.081	0.254	161	0.5833	2107.7	0.5293
ERE(NR),IR3/MCF7-ERa-ChIP-Seq(Unpublished)/Homer	VAGGTCACNSTGACC	0.1	-3.037	0.2611	51	0.1848	579	0.1454
GRE(NR),IR3/RAW264.7-GRE-ChIP-Seq(Unpublished)/Homer	VAGRACAKWCTGTYC	0.1	-2.983	0.2708	49	0.1775	555.5	0.1395
NFY(CCAAT)/Promoter/Homer	RGCCAATSRG	0.1	-2.939	0.2785	145	0.5254	1884.7	0.4733
Max(bHLH)/K562-Max-ChIP-Seq(GSE31477)/Homer	RCCACGTGGYYN	0.1	-2.921	0.2789	111	0.4022	1402.4	0.3522
STAT6(Stat)/CD4-Stat6-ChIP-Seq(GSE22104)/Homer	ABTTCYYRRGAA	0.1	-2.92	0.2789	122	0.442	1557.4	0.3911
HIF-1b(HLH)/T47D-HIF1b-ChIP-Seq(GSE59937)/Homer	RTACGTGC	0.1	-2.901	0.2789	163	0.5906	2147.7	0.5393
GATA3(Zf),DR4/iTreg-Gata3-ChIP-Seq(GSE20898)/Homer	AGATGKDGAGATAAG	0.1	-2.767	0.3103	32	0.1159	344.9	0.0866
GATA3(Zf)/iTreg-Gata3-ChIP-Seq(GSE20898)/Homer	AGATAASR	0.1	-2.68	0.3335	235	0.8514	3242.9	0.8143
EKLF(Zf)/Erythrocyte-Klf1-ChIP-Seq(GSE20478)/Homer	NWGGGTGTGGCY	0.1	-2.676	0.3335	59	0.2138	701.3	0.1761
Nkx3.1(Homeobox)/LNCaP-Nkx3.1-ChIP-Seq(GSE28264)/Homer	AAGCACTTAA	0.1	-2.655	0.3335	268	0.971	3783.5	0.9501
NFkB-p65-Rel(RHD)/ThioMac-LPS-Expression(GSE23622)/Homer	GGAAATTCCC	0.1	-2.624	0.3374	16	0.058	151.3	0.038
TATA-box/Drosophila-Promoters/Homer	CTATAAAAGCSV	0.1	-2.611	0.3374	30	0.1087	325	0.0816
Klf4(Zf)/mES-Klf4-ChIP-Seq(GSE11431)/Homer	GCCACACCCA	0.1	-2.602	0.3374	99	0.3587	1253.1	0.3147
E-box/Drosophila-Promoters/Homer	AACAGCTGTTHN	0.1	-2.516	0.3601	44	0.1594	509.7	0.128
EHF(ETS)/LoVo-EHF-ChIP-Seq(GSE49402)/Homer	AVCAGGAAGT	0.1	-2.488	0.3653	192	0.6957	2601	0.6531
HIF2a(bHLH)/785_O-HIF2a-ChIP-Seq(GSE34871)/Homer	GCACGTACCC	0.1	-2.484	0.3653	64	0.2319	778.5	0.1955
PRDM14(Zf)/H1-PRDM14-ChIP-Seq(GSE22767)/Homer	RGGTCTCTAACY	0.1	-2.428	0.3777	64	0.2319	781.1	0.1962
Oct2(POU,Homeobox)/Bcell-Oct2-ChIP-Seq(GSE21512)/Homer	ATATGCAAAT	0.1	-2.392	0.3864	99	0.3587	1266.8	0.3181
Eomes(T-box)/H9-Eomes-ChIP-Seq(GSE26097)/Homer	ATTAACACCT	0.1	-2.388	0.3864	261	0.9457	3672.2	0.9222
CTCF-SatelliteElement(Zf?)/CD4+-CTCF-ChIP-Seq(Barski et al.)/Homer	TGCAGTTCCMVNWRTGGCCA	0.1	-2.369	0.3864	4	0.0145	23.3	0.0058
Fra1(bZIP)/BT549-Fra1-ChIP-Seq(GSE46166)/Homer	NNATGASTCATH	0.1	-2.332	0.3944	105	0.3804	1354.9	0.3402
E2F(E2F)/Hela-CellCycle-Expression/Homer	TTSGCGCGAAAA	0.1	-2.323	0.3944	11	0.0399	99.4	0.025
ETS:RUNX(ETS,Runt)/Jurkat-RUNX1-ChIP-Seq(GSE17954)/Homer	RCAGGATGTGGT	0.1	-2.309	0.3944	22	0.0797	233.7	0.0587
Hoxc9(Homeobox)/Ainv15-Hoxc9-ChIP-Seq(GSE21812)/Homer	GGCCATAAATCA	1	-2.302	0.3944	132	0.4783	1739.7	0.4369
Isl1(Homeobox)/Neuron-Isl1-ChIP-Seq(GSE31456)/Homer	CTAATKGV	1	-2.278	0.3962	246	0.8913	3435.1	0.8626
TOD6?/SacCer-Promoters/Homer	GCGATGAGMT	1	-2.272	0.3962	44	0.1594	520.4	0.1307
Gata1(Zf)/K562-GATA1-ChIP-Seq(GSE18829)/Homer	SAGATAAGRV	1	-2.247	0.3994	129	0.4674	1700.7	0.4271
Unknown1/Arabidopsis-Promoters/Homer	RGGGTAWWWTHGTAA	1	-2.236	0.3994	27	0.0978	299.7	0.0753
Cbf1(bHLH)/Yeast-Cbf1-ChIP-Seq(GSE29506)/Homer	TCACGTGAYH	1	-2.213	0.4035	52	0.1884	630.3	0.1583
Rfx1(HTH)/NPC-H3K4me1-ChIP-Seq(GSE16256)/Homer	KGTTGCCATGGCAA	1	-2.191	0.4077	37	0.1341	431.5	0.1084
CRE(bZIP)/Promoter/Homer	CSGTGACGTCAC	1	-2.173	0.4104	38	0.1377	445.4	0.1119
AP-1(bZIP)/ThioMac-PU.1-ChIP-Seq(GSE21512)/Homer	VTGACTCATC	1	-2.141	0.4191	127	0.4601	1679.5	0.4218
CHR(?)/Hela-CellCycle-Expression/Homer	SRGTTTCAAA	1	-2.13	0.4193	154	0.558	2068.7	0.5195
Atf3(bZIP)/GBM-ATF3-ChIP-Seq(GSE33912)/Homer	DATGASTCATHN	1	-2.128	0.4193	119	0.4312	1566.3	0.3933
bHLHE40(bHLH)/HepG2-BHLHE40-ChIP-Seq(GSE31477)/Homer	KCACGTGMCN	1	-2.128	0.4193	53	0.192	648.2	0.1628
USF1(bHLH)/GM12878-Usf1-ChIP-Seq(GSE32465)/Homer	SGTCACGTGR	1	-2.112	0.4193	75	0.2717	950.1	0.2386
PAX5(Paired,Homeobox)/GM12878-PAX5-ChIP-Seq(GSE32465)/Homer	GCAGCCAAGCRTGACH	1	-2.09	0.4193	88	0.3188	1132.9	0.2845
PR(NR)/T47D-PR-ChIP-Seq(GSE31130)/Homer	VAGRACAKNCTGTBC	1	-2.077	0.4193	247	0.8949	3461.4	0.8692
Unknown(Homeobox)/Limb-p300-ChIP-Seq/Homer	SSCMATWAAA	1	-2.056	0.4234	159	0.5761	2146.5	0.539
Nr5a2(NR)/Pancreas-LRH1-ChIP-Seq(GSE34295)/Homer	BTCAAGGTCA	1	-2.049	0.4234	120	0.4348	1586.8	0.3985
EFL-1(E2F)/cElegans-L1-EFL1-ChIP-Seq(modEncode)/Homer	TGCAARYGCGCTCYA	1	-2.018	0.4308	5	0.0181	37.2	0.0093
FXR(NR),IR1/Liver-FXR-ChIP-Seq(Chong et al.)/Homer	AGGTCANTGACCTB	1	-1.989	0.4392	74	0.2681	944.3	0.2371
Tbx20(T-box)/Heart-Tbx20-ChIP-Seq(GSE29636)/Homer	GGTGYTGACAGS	1	-1.954	0.4504	40	0.1449	482.3	0.1211
IRF4(IRF)/GM12878-IRF4-ChIP-Seq(GSE32465)/Homer	ACTGAAACCA	1	-1.938	0.4532	108	0.3913	1424.2	0.3576
Cdx2(Homeobox)/mES-Cdx2-ChIP-Seq(GSE14586)/Homer	GYMATAAAAH	1	-1.932	0.4532	180	0.6522	2462.2	0.6183
PU.1-IRF(ETS:IRF)/Bcell-PU.1-ChIP-Seq(GSE21512)/Homer	MGGAAGTGAAAC	1	-1.915	0.4547	214	0.7754	2967.7	0.7452
GAGA-repeat/Arabidopsis-Promoters/Homer	CTCTCTCTCY	1	-1.903	0.4558	210	0.7609	2908.7	0.7304
Pax7(Paired,Homeobox),long/Myoblast-Pax7-ChIP-Seq(GSE25064)/Homer	TAATCHGATTAC	1	-1.9	0.4558	13	0.0471	133.3	0.0335
JunD(bZIP)/K562-JunD-ChIP-Seq/Homer	ATGACGTCATCN	1	-1.893	0.4558	18	0.0652	197	0.0495
EWS:ERG-fusion(ETS)/CADO_ES1-EWS:ERG-ChIP-Seq(SRA014231)/Homer	ATTTCCTGTN	1	-1.873	0.4566	138	0.5	1857	0.4663
AP-2gamma(AP2)/MCF7-TFAP2C-ChIP-Seq(GSE21234)/Homer	SCCTSAGGSCAW	1	-1.865	0.4566	139	0.5036	1872.2	0.4701
Lhx3(Homeobox)/Neuron-Lhx3-ChIP-Seq(GSE31456)/Homer	ADBTAATTAR	1	-1.863	0.4566	239	0.8659	3349.7	0.8412
EBF(EBF)/proBcell-EBF-ChIP-Seq(GSE21978)/Homer	DGTCCCYRGGGA	1	-1.855	0.4566	35	0.1268	420.8	0.1057
NFkB-p65(RHD)/GM12787-p65-ChIP-Seq(GSE19485)/Homer	WGGGGATTTCCC	1	-1.847	0.4566	102	0.3696	1346.2	0.3381
GAGA-repeat/SacCer-Promoters/Homer	CTYTCTYTCTCTCTC	1	-1.815	0.4625	276	1	3955.8	0.9934
STAT1(Stat)/HelaS3-STAT1-ChIP-Seq(GSE12782)/Homer	NATTTCCNGGAAAT	1	-1.809	0.4625	75	0.2717	970.8	0.2438
PBX1(Homeobox)/MCF7-PBX1-ChIP-Seq(GSE28007)/Homer	GSCTGTCACTCA	1	-1.796	0.4633	22	0.0797	251.7	0.0632
TATA-Box(TBP)/Promoter/Homer	CCTTTTAWAGSC	1	-1.787	0.4635	217	0.7862	3021.4	0.7587
PRDM1(Zf)/Hela-PRDM1-ChIP-Seq(GSE31477)/Homer	ACTTTCACTTTC	1	-1.782	0.4635	128	0.4638	1721.1	0.4322
Tcf4(HMG)/Hct116-Tcf4-ChIP-Seq(SRA012054)/Homer	ASATCAAAGGVA	1	-1.759	0.4686	95	0.3442	1254.7	0.3151
Nrf2(bZIP)/Lymphoblast-Nrf2-ChIP-Seq(GSE37589)/Homer	HTGCTGAGTCAT	1	-1.751	0.4686	10	0.0362	100.3	0.0252
MafK(bZIP)/C2C12-MafK-ChIP-Seq(GSE36030)/Homer	GCTGASTCAGCA	1	-1.739	0.4702	48	0.1739	602.7	0.1513
STAT6(Stat)/Macrophage-Stat6-ChIP-Seq(GSE38377)/Homer	TTCCKNAGAA	1	-1.72	0.4748	113	0.4094	1512.6	0.3798
E2F7(E2F)/Hela-E2F7-ChIP-Seq(GSE32673)/Homer	VDTTTCCCGCCA	1	-1.695	0.4829	27	0.0978	321.6	0.0808
Esrrb(NR)/mES-Esrrb-ChIP-Seq(GSE11431)/Homer	KTGACCTTGA	1	-1.684	0.4845	117	0.4239	1572.7	0.3949
Fosl2(bZIP)/3T3L1-Fosl2-ChIP-Seq(GSE56872)/Homer	NATGASTCABNN	1	-1.584	0.531	55	0.1993	708.5	0.1779
p63(p53)/Keratinocyte-p63-ChIP-Seq(GSE17611)/Homer	NNDRCATGYCYNRRCATGYH	1	-1.565	0.5369	68	0.2464	890.5	0.2236
p53(p53)/Saos-p53-ChIP-Seq/Homer	RRCATGYCYRGRCATGYYYN	1	-1.559	0.5369	18	0.0652	208	0.0522
p53(p53)/Saos-p53-ChIP-Seq(GSE15780)/Homer	RRCATGYCYRGRCATGYYYN	1	-1.559	0.5369	18	0.0652	208	0.0522
Sox2(HMG)/mES-Sox2-ChIP-Seq(GSE11431)/Homer	BCCATTGTTC	1	-1.541	0.5369	162	0.587	2232.8	0.5607
ELF5(ETS)/T47D-ELF5-ChIP-Seq(GSE30407)/Homer	ACVAGGAAGT	1	-1.536	0.5369	136	0.4928	1857.3	0.4664
EGL-5(Homeobox)/cElegans-L3-EGL5-ChIP-Seq(modEncode)/Homer	ATTTAATGGG	1	-1.52	0.54	241	0.8732	3401.2	0.8541
ARE(NR)/LNCAP-AR-ChIP-Seq(GSE27824)/Homer	RGRACASNSTGTYCYB	1	-1.513	0.54	44	0.1594	561.7	0.1411
BATF(bZIP)/Th17-BATF-ChIP-Seq(GSE39756)/Homer	DATGASTCAT	1	-1.513	0.54	114	0.413	1544.9	0.3879
PCF/Arabidopsis-Promoters/Homer	NNWWWTGGGCYTDDN	1	-1.495	0.541	56	0.2029	728.7	0.183
Arnt:Ahr(bHLH)/MCF7-Arnt-ChIP-Seq(Lo et al.)/Homer	TBGCACGCAA	1	-1.493	0.541	97	0.3514	1304.5	0.3276
PIF5ox(bHLH)/Arabidopsis-PIF5ox-ChIP-Seq(GSE35062)/Homer	BCACGTGVDN	1	-1.475	0.5442	142	0.5145	1949.9	0.4897
CES-1(Homeobox)/cElegans-L1-CES1-ChIP-Seq(modEncode)/Homer	AAATTSAATTTN	1	-1.466	0.5449	156	0.5652	2152.3	0.5405
STAT4(Stat)/CD4-Stat4-ChIP-Seq(GSE22104)/Homer	NYTTCCWGGAAR	1	-1.435	0.5582	168	0.6087	2329.5	0.585
NPAS2(bHLH)/Liver-NPAS2-ChIP-Seq(GSE39860)/Homer	KCCACGTGAC	1	-1.434	0.5582	177	0.6413	2460.5	0.6179
RBPJ:Ebox(?,bHLH)/Panc1-Rbpj1-ChIP-Seq(GSE47459)/Homer	GGGRAARRGRMCAGMTG	1	-1.414	0.5618	55	0.1993	720	0.1808
HRE(HSF)/Striatum-HSF1-ChIP-Seq(GSE38000)/Homer	TTCTAGAABNTTCTA	1	-1.376	0.5793	44	0.1594	570.4	0.1432
Tbet(T-box)/CD8-Tbet-ChIP-Seq(GSE33802)/Homer	AGGTGTGAAM	1	-1.358	0.5857	202	0.7319	2833.4	0.7115
Rfx5(HTH)/GM12878-Rfx5-ChIP-Seq(GSE31477)/Homer	SCCTAGCAACAG	1	-1.325	0.6011	69	0.25	923.3	0.2319
AP-2alpha(AP2)/Hela-AP2alpha-ChIP-Seq(GSE31477)/Homer	ATGCCCTGAGGC	1	-1.316	0.6018	116	0.4203	1591.5	0.3997
Nkx2.5(Homeobox)/HL1-Nkx2.5.biotin-ChIP-Seq(GSE21529)/Homer	RRSCACTYAA	1	-1.302	0.6063	262	0.9493	3735.8	0.9381
BMAL1(bHLH)/Liver-Bmal1-ChIP-Seq(GSE39860)/Homer	GNCACGTG	1	-1.264	0.6254	214	0.7754	3018.4	0.758
ETS:E-box(ETS,bHLH)/HPC7-Scl-ChIP-Seq(GSE22178)/Homer	AGGAARCAGCTG	1	-1.234	0.6402	16	0.058	195.5	0.0491
TEAD4(TEA)/Tropoblast-Tead4-ChIP-Seq(GSE37350)/Homer	CCWGGAATGY	1	-1.212	0.6498	151	0.5471	2105.1	0.5286
HLH-1(bHLH)/cElegans-Embryo-HLH1-ChIP-Seq(modEncode)/Homer	RACAGCTGTTBH	1	-1.196	0.6557	127	0.4601	1761.6	0.4424
Pdx1(Homeobox)/Islet-Pdx1-ChIP-Seq(SRA008281)/Homer	YCATYAATCA	1	-1.192	0.6557	181	0.6558	2542.6	0.6385
Initiator/Drosophila-Promoters/Homer	NTCAGTYG	1	-1.173	0.6621	250	0.9058	3560.5	0.8941
GFY(?)/Promoter/Homer	ACTACAATTCCC	1	-1.17	0.6621	12	0.0435	144.1	0.0362
GRE(NR),IR3/A549-GR-ChIP-Seq(GSE32465)/Homer	NRGVACABNVTGTYCY	1	-1.147	0.671	22	0.0797	281.7	0.0707
E-box/Arabidopsis-Promoters/Homer	GCCACGTG	1	-1.128	0.6793	58	0.2101	785.3	0.1972
MITF(bHLH)/MastCells-MITF-ChIP-Seq(GSE48085)/Homer	RTCATGTGAC	1	-1.102	0.6921	144	0.5217	2016	0.5063
CTCF(Zf)/CD4+-CTCF-ChIP-Seq(Barski et al.)/Homer	AYAGTGCCMYCTRGTGGCCA	1	-1.097	0.6921	21	0.0761	270.9	0.068
Tbox:Smad(T-box,MAD)/ESCd5-Smad2_3-ChIP-Seq(GSE29422)/Homer	AGGTGHCAGACA	1	-1.089	0.6925	35	0.1268	466	0.117
ISRE(IRF)/ThioMac-LPS-Expression(GSE23622)/Homer	AGTTTCASTTTC	1	-1.079	0.6952	17	0.0616	216.2	0.0543
YY1(Zf)/Promoter/Homer	CAAGATGGCGGC	1	-1.069	0.6974	19	0.0688	244.4	0.0614
THRa(NR)/C17.2-THRa-ChIP-Seq(GSE38347)/Homer	GGTCANYTGAGGWCA	1	-1.058	0.7006	134	0.4855	1877.1	0.4714
STAT5(Stat)/mCD4+-Stat5-ChIP-Seq(GSE12346)/Homer	RTTTCTNAGAAA	1	-1.047	0.7044	72	0.2609	991.8	0.2491
NeuroD1(bHLH)/Islet-NeuroD1-ChIP-Seq(GSE30298)/Homer	GCCATCTGTT	1	-1.035	0.7081	127	0.4601	1779.7	0.4469
NF1(CTF)/LNCAP-NF1-ChIP-Seq(Unpublished)/Homer	CYTGGCABNSTGCCAR	1	-1.03	0.7081	69	0.25	950.8	0.2388
Pit1+1bp(Homeobox)/GCrat-Pit1-ChIP-Seq(GSE58009)/Homer	ATGCATAATTCA	1	-1.02	0.7101	108	0.3913	1508	0.3787
Brachyury(T-box)/Mesoendoderm-Brachyury-ChIP-exo(GSE54963)/Homer	ANTTMRCASBNNNGTGYKAAN	1	-1.008	0.7143	58	0.2101	796.7	0.2001
bZIP:IRF(bZIP,IRF)/Th17-BatF-ChIP-Seq(GSE39756)/Homer	NAGTTTCABTHTGACTNW	1	-0.9895	0.7232	115	0.4167	1612.7	0.405
MafA(bZIP)/Islet-MafA-ChIP-Seq(GSE30298)/Homer	TGCTGACTCA	1	-0.989	0.7232	112	0.4058	1569.8	0.3942
SFP1/SacCer-Promoters/Homer	DDAAAAATTTTY	1	-0.9879	0.7232	53	0.192	727.6	0.1827
Fox:Ebox(Forkhead,bHLH)/Panc1-Foxa2-ChIP-Seq(GSE47459)/Homer	NNNVCTGWGYAAACASN	1	-0.9705	0.7239	161	0.5833	2277.9	0.572
c-Myc(bHLH)/mES-cMyc-ChIP-Seq(GSE11431)/Homer	VVCCACGTGG	1	-0.9649	0.7239	70	0.2536	971.6	0.244
Pho4(bHLH)/Yeast-Pho4-ChIP-Seq(GSE29506)/Homer	AAGCACGTGBGD	1	-0.8703	0.7908	28	0.1014	383.8	0.0964
Lhx2(Homeobox)/HFSC-Lhx2-ChIP-Seq(GSE48068)/Homer	TAATTAGN	1	-0.8541	0.799	194	0.7029	2769.1	0.6954
Nr5a2(NR)/mES-Nr5a2-ChIP-Seq(GSE19019)/Homer	BTCAAGGTCA	1	-0.8472	0.7999	82	0.2971	1156.6	0.2904
ZFX(Zf)/mES-Zfx-ChIP-Seq(GSE11431)/Homer	AGGCCTRG	1	-0.8463	0.7999	159	0.5761	2264.4	0.5686
CRX(Homeobox)/Retina-Crx-ChIP-Seq(GSE20012)/Homer	GCTAATCC	1	-0.8406	0.7999	269	0.9746	3865	0.9706
RUNX(Runt)/HPC7-Runx1-ChIP-Seq(GSE22178)/Homer	SAAACCACAG	1	-0.8123	0.8141	116	0.4203	1649.1	0.4141
VDR(NR),DR3/GM10855-VDR+vitD-ChIP-Seq(GSE22484)/Homer	ARAGGTCANWGAGTTCANNN	1	-0.8059	0.8147	42	0.1522	588.5	0.1478
GATA(Zf),IR4/iTreg-Gata3-ChIP-Seq(GSE20898)/Homer	NAGATWNBNATCTNN	1	-0.7995	0.8153	21	0.0761	289.2	0.0726
NF1:FOXA1(CTF,Forkhead)/LNCAP-FOXA1-ChIP-Seq(GSE27824)/Homer	WNTGTTTRYTTTGGCA	1	-0.783	0.8242	11	0.0399	149	0.0374
HNF4a(NR),DR1/HepG2-HNF4a-ChIP-Seq(GSE25021)/Homer	CARRGKBCAAAGTYCA	1	-0.7732	0.8277	81	0.2935	1151.3	0.2891
Olig2(bHLH)/Neuron-Olig2-ChIP-Seq(GSE30882)/Homer	RCCATMTGTT	1	-0.7514	0.8412	231	0.837	3317.6	0.8331
Pit1(Homeobox)/GCrat-Pit1-ChIP-Seq(GSE58009)/Homer	ATGMATATDC	1	-0.7465	0.8412	201	0.7283	2884.9	0.7245
RARg(NR)/ES-RARg-ChIP-Seq(GSE30538)/Homer	AGGTCAAGGTCA	1	-0.7414	0.8412	6	0.0217	79.8	0.02
Ets1-distal(ETS)/CD4+-PolII-ChIP-Seq(Barski et al.)/Homer	MACAGGAAGT	1	-0.7337	0.8422	49	0.1775	696.8	0.175
SPDEF(ETS)/VCaP-SPDEF-ChIP-Seq(SRA014231)/Homer	ASWTCCTGBT	1	-0.7269	0.8433	157	0.5688	2252.1	0.5655
Unknown2/Arabidopsis-Promoters/Homer	AAACGACGTCGTTTT	1	-0.7159	0.848	1	0.0036	9.3	0.0023
EBNA1(EBV virus)/Raji-EBNA1-ChIP-Seq(GSE30709)/Homer	GGYAGCAYDTGCTDCCCNNN	1	-0.7157	0.848	2	0.0072	23.3	0.0058
Foxa2(Forkhead)/Liver-Foxa2-ChIP-Seq(GSE25694)/Homer	CYTGTTTACWYW	1	-0.7147	0.848	155	0.5616	2225.4	0.5588
Phox2a(Homeobox)/Neuron-Phox2a-ChIP-Seq(GSE31456)/Homer	YTAATYNRATTA	1	-0.7085	0.848	126	0.4565	1808.4	0.4541
Sox3(HMG)/NPC-Sox3-ChIP-Seq(GSE33059)/Homer	CCWTTGTY	1	-0.7066	0.848	231	0.837	3322	0.8342
Otx2(Homeobox)/EpiLC-Otx2-ChIP-Seq(GSE56098)/Homer	NYTAATCCYB	1	-0.6781	0.8575	178	0.6449	2563	0.6436
NF1-halfsite(CTF)/LNCaP-NF1-ChIP-Seq(Unpublished)/Homer	YTGCCAAG	1	-0.6703	0.8598	205	0.7428	2952.7	0.7415
Pax7(Paired,Homeobox),longest/Myoblast-Pax7-ChIP-Seq(GSE25064)/Homer	NTAATTDGCYAATTANNWWD	1	-0.661	0.8633	15	0.0543	213.5	0.0536
NFAT:AP1(RHD,bZIP)/Jurkat-NFATC1-ChIP-Seq(Jolma et al.)/Homer	SARTGGAAAAWRTGAGTCAB	1	-0.6562	0.8633	42	0.1522	604.3	0.1518
Gata4(Zf)/Heart-Gata4-ChIP-Seq(GSE35151)/Homer	NBWGATAAGR	1	-0.6455	0.8677	178	0.6449	2567.4	0.6447
Srebp1a(bHLH)/HepG2-Srebp1a-ChIP-Seq(GSE31477)/Homer	RTCACSCCAY	1	-0.6394	0.8686	66	0.2391	953.7	0.2395
RXR(NR),DR1/3T3L1-RXR-ChIP-Seq(GSE13511)/Homer	TAGGGCAAAGGTCA	1	-0.6332	0.8694	153	0.5543	2209.7	0.5549
caudal(Homeobox)/Drosophila-Embryos-ChIP-Chip(modEncode)/Homer	GGYCATAAAW	1	-0.6069	0.8881	175	0.6341	2530.5	0.6354
Jun-AP1(bZIP)/K562-cJun-ChIP-Seq(GSE31477)/Homer	GATGASTCATCN	1	-0.605	0.8881	36	0.1304	523.1	0.1314
Tlx?(NR)/NPC-H3K4me1-ChIP-Seq(GSE16256)/Homer	CTGGCAGSCTGCCA	1	-0.5874	0.8965	67	0.2428	975.5	0.245
TEAD2(TEA)/Py2T-Tead2-ChIP-Seq(GSE55709)/Homer	CCWGGAATGY	1	-0.5817	0.8971	106	0.3841	1540.2	0.3868
ZNF711(Zf)/SHSY5Y-ZNF711-ChIP-Seq(GSE20673)/Homer	AGGCCTAG	1	-0.5743	0.8993	211	0.7645	3052.6	0.7666
Sox4(HMG)/proB-Sox4-ChIP-Seq(GSE50066)/Homer	YCTTTGTTCC	1	-0.5554	0.9119	147	0.5326	2136	0.5364
CLOCK(bHLH)/Liver-Clock-ChIP-Seq(GSE39860)/Homer	GHCACGTG	1	-0.5278	0.9328	76	0.2754	1115.3	0.2801
FOXA1(Forkhead)/LNCAP-FOXA1-ChIP-Seq(GSE27824)/Homer	WAAGTAAACA	1	-0.5265	0.9328	217	0.7862	3145.9	0.79
EWS:FLI1-fusion(ETS)/SK_N_MC-EWS:FLI1-ChIP-Seq(SRA014231)/Homer	VACAGGAAAT	1	-0.5247	0.9328	93	0.337	1362.4	0.3421
Unknown6/Drosophila-Promoters/Homer	AATTTTAAAA	1	-0.5233	0.9328	208	0.7536	3017.3	0.7577
Smad3(MAD)/NPC-Smad3-ChIP-Seq(GSE36673)/Homer	TWGTCTGV	1	-0.5107	0.9328	255	0.9239	3687	0.9259
p53(p53)/mES-cMyc-ChIP-Seq(GSE11431)/Homer	ACATGCCCGGGCAT	1	-0.5045	0.9328	4	0.0145	60.8	0.0153
Bach1(bZIP)/K562-Bach1-ChIP-Seq(GSE31477)/Homer	AWWNTGCTGAGTCAT	1	-0.485	0.9456	7	0.0254	107.1	0.0269
SeqBias: A/T bias	WWWWWWWWWW	1	-0.4694	0.9559	276	1	3975.3	0.9983
Oct4(POU,Homeobox)/mES-Oct4-ChIP-Seq(GSE11431)/Homer	ATTTGCATAW	1	-0.4588	0.9616	117	0.4239	1722.9	0.4327
REST-NRSF(Zf)/Jurkat-NRSF-ChIP-Seq/Homer	GGMGCTGTCCATGGTGCTGA	1	-0.4547	0.9616	1	0.0036	14.9	0.0037
Tbx5(T-box)/HL1-Tbx5.biotin-ChIP-Seq(GSE21529)/Homer	AGGTGTCA	1	-0.4475	0.9633	269	0.9746	3885.1	0.9756
GRHL2(CP2)/HBE-GRHL2-ChIP-Seq(GSE46194)/Homer	AAACYKGTTWDACMRGTTTB	1	-0.4468	0.9633	75	0.2717	1115.2	0.28
E-box(bHLH)/Promoter/Homer	SSGGTCACGTGA	1	-0.4433	0.9633	11	0.0399	171.9	0.0432
REB1/SacCer-Promoters/Homer	KCCGGGTAAYRR	1	-0.4299	0.9668	36	0.1304	546.8	0.1373
GATA3(Zf),DR8/iTreg-Gata3-ChIP-Seq(GSE20898)/Homer	AGATSTNDNNDSAGATAASN	1	-0.4291	0.9668	16	0.058	248.4	0.0624
Unknown4/Arabidopsis-Promoters/Homer	CKTCKTCTTY	1	-0.4233	0.9668	166	0.6014	2435.6	0.6116
SEP3(MADS)/Arabidoposis-Flower-Sep3-ChIP-Seq/Homer	CCAAAAAGGG	1	-0.4183	0.9668	226	0.8188	3290.7	0.8264
Atf7(bZIP)/3T3L1-Atf7-ChIP-Seq(GSE56872)/Homer	NGRTGACGTCAY	1	-0.4028	0.9753	119	0.4312	1763.3	0.4428
CEBP(bZIP)/ThioMac-CEBPb-ChIP-Seq(GSE21512)/Homer	ATTGCGCAAC	1	-0.3986	0.9753	171	0.6196	2513	0.631
PPARE(NR),DR1/3T3L1-Pparg-ChIP-Seq(GSE13511)/Homer	TGACCTTTGCCCCA	1	-0.3959	0.9753	136	0.4928	2010.2	0.5048
OCT4-SOX2-TCF-NANOG(POU,Homeobox,HMG)/mES-Oct4-ChIP-Seq(GSE11431)/Homer	ATTTGCATAACAATG	1	-0.3927	0.9753	57	0.2065	862.5	0.2166
Erra(NR)/HepG2-Erra-ChIP-Seq(GSE31477)/Homer	CAAAGGTCAG	1	-0.3901	0.9753	241	0.8732	3505.4	0.8803
TEAD(TEA)/Fibroblast-PU.1-ChIP-Seq(Unpublished)/Homer	YCWGGAATGY	1	-0.3705	0.9849	136	0.4928	2016.4	0.5063
Atf2(bZIP)/3T3L1-Atf2-ChIP-Seq(GSE56872)/Homer	NRRTGACGTCAT	1	-0.3494	1	70	0.2536	1062.4	0.2668
Atoh1(bHLH)/Cerebellum-Atoh1-ChIP-Seq(GSE22111)/Homer	VNRVCAGCTGGY	1	-0.3428	1	152	0.5507	2254	0.566
HOXA2(Homeobox)/mES-Hoxa2-ChIP-Seq(Donaldson et al.)/Homer	GYCATCMATCAT	1	-0.3284	1	23	0.0833	367.5	0.0923
FOXA1(Forkhead)/MCF7-FOXA1-ChIP-Seq(GSE26831)/Homer	WAAGTAAACA	1	-0.3142	1	200	0.7246	2944	0.7393
Sox10(HMG)/SciaticNerve-Sox3-ChIP-Seq(GSE35132)/Homer	CCWTTGTYYB	1	-0.3062	1	217	0.7862	3185.8	0.8
Usf2(bHLH)/C2C12-Usf2-ChIP-Seq(GSE36030)/Homer	GTCACGTGGT	1	-0.3054	1	78	0.2826	1190.8	0.299
HIF-1a(bHLH)/MCF7-HIF1a-ChIP-Seq(GSE28352)/Homer	TACGTGCV	1	-0.3024	1	41	0.1486	643.3	0.1616
Pax8(Paired,Homeobox)/Thyroid-Pax8-ChIP-Seq(GSE26938)/Homer	GTCATGCHTGRCTGS	1	-0.2983	1	67	0.2428	1030.7	0.2588
RORgt(NR)/EL4-RORgt.Flag-ChIP-Seq(GSE56019)/Homer	AAYTAGGTCA	1	-0.2933	1	24	0.087	388.8	0.0976
FOXA1:AR(Forkhead,NR)/LNCAP-AR-ChIP-Seq(GSE27824)/Homer	AGTAAACAAAAAAGAACAND	1	-0.2928	1	28	0.1014	449.2	0.1128
IRF2(IRF)/Erythroblas-IRF2-ChIP-Seq(GSE36985)/Homer	GAAASYGAAASY	1	-0.2898	1	22	0.0797	358.6	0.09
RLR1?/SacCer-Promoters/Homer	WTTTTCYYTTTT	1	-0.274	1	223	0.808	3276.1	0.8227
TCFL2(HMG)/K562-TCF7L2-ChIP-Seq(GSE29196)/Homer	ACWTCAAAGG	1	-0.2705	1	14	0.0507	237.2	0.0596
Sox6(HMG)/Myotubes-Sox6-ChIP-Seq(GSE32627)/Homer	CCATTGTTNY	1	-0.2705	1	221	0.8007	3249	0.8159
HOXD13(Homeobox)/Chicken-Hoxd13-ChIP-Seq(GSE38910)/Homer	NCYAATAAAA	1	-0.2631	1	218	0.7899	3209.3	0.8059
TR4(NR),DR1/Hela-TR4-ChIP-Seq(GSE24685)/Homer	GAGGTCAAAGGTCA	1	-0.2621	1	15	0.0543	254.6	0.0639
CArG(MADS)/PUER-Srf-ChIP-Seq(Sullivan et al.)/Homer	CCATATATGGNM	1	-0.2463	1	61	0.221	955.4	0.2399
Srebp2(bHLH)/HepG2-Srebp2-ChIP-Seq(GSE31477)/Homer	CGGTCACSCCAC	1	-0.235	1	50	0.1812	794.2	0.1994
TATA-box/SacCer-Promoters/Homer	BBHWTATATA	1	-0.234	1	150	0.5435	2256.1	0.5665
MafF(bZIP)/HepG2-MafF-ChIP-Seq(GSE31477)/Homer	HWWGTCAGCAWWTTT	1	-0.2334	1	76	0.2754	1181.5	0.2967
Nur77(NR)/K562-NR4A1-ChIP-Seq(GSE31363)/Homer	TGACCTTTNCNT	1	-0.2315	1	33	0.1196	538.2	0.1352
RUNX-AML(Runt)/CD4+-PolII-ChIP-Seq(Barski et al.)/Homer	GCTGTGGTTW	1	-0.2306	1	118	0.4275	1796.6	0.4512
NFkB-p50,p52(RHD)/Monocyte-p50-ChIP-Chip(Schreiber et al.)/Homer	GGGGGAATCCCC	1	-0.2189	1	17	0.0616	293.1	0.0736
HNF6(Homeobox)/Liver-Hnf6-ChIP-Seq(ERP000394)/Homer	NTATYGATCH	1	-0.2108	1	122	0.442	1861.4	0.4674
ZNF143|STAF(Zf)/CUTLL-ZNF143-ChIP-Seq(GSE29600)/Homer	ATTTCCCAGVAKSCY	1	-0.2098	1	61	0.221	966.9	0.2428
AR-halfsite(NR)/LNCaP-AR-ChIP-Seq(GSE27824)/Homer	CCAGGAACAG	1	-0.2036	1	264	0.9565	3842.2	0.9648
SeqBias: CG bias	SSSSSSSSSS	1	-0.2033	1	274	0.9928	3962	0.9949
Tcf3(HMG)/mES-Tcf3-ChIP-Seq(GSE11724)/Homer	ASWTCAAAGG	1	-0.1997	1	46	0.1667	744.9	0.1871
Pho2(bHLH)/Yeast-Pho2-ChIP-Seq(GSE29506)/Homer	CCCACGTGCT	1	-0.1908	1	48	0.1739	777.2	0.1952
c-Jun-CRE(bZIP)/K562-cJun-ChIP-Seq(GSE31477)/Homer	ATGACGTCATCY	1	-0.1897	1	69	0.25	1092.6	0.2744
Mouse_Recombination_Hotspot(Zf)/Testis-DMC1-ChIP-Seq(GSE24438)/Homer	ACTYKNATTCGTGNTACTTC	1	-0.1801	1	15	0.0543	269.3	0.0676
Smad4(MAD)/ESC-SMAD4-ChIP-Seq(GSE29422)/Homer	VBSYGTCTGG	1	-0.1787	1	183	0.663	2745.9	0.6895
Reverb(NR),DR2/RAW-Reverba.biotin-ChIP-Seq(GSE45914)/Homer	GTRGGTCASTGGGTCA	1	-0.1721	1	33	0.1196	554.8	0.1393
GSC(Homeobox)/FrogEmbryos-GSC-ChIP-Seq(DRA000576)/Homer	RGGATTAR	1	-0.1701	1	242	0.8768	3561.6	0.8944
SpiB(ETS)/OCILY3-SPIB-ChIP-Seq(GSE56857)/Homer	AAAGRGGAAGTG	1	-0.1689	1	46	0.1667	754.9	0.1896
IRF1(IRF)/PBMC-IRF1-ChIP-Seq(GSE43036)/Homer	GAAAGTGAAAGT	1	-0.1688	1	29	0.1051	494	0.124
AARE(HLH)/mES-cMyc-ChIP-Seq/Homer	GATTGCATCA	1	-0.1682	1	24	0.087	415.4	0.1043
RUNX2(Runt)/PCa-RUNX2-ChIP-Seq(GSE33889)/Homer	NWAACCACADNN	1	-0.1645	1	129	0.4674	1981.8	0.4977
Unknown5/Drosophila-Promoters/Homer	GCTGATAASV	1	-0.164	1	96	0.3478	1501.4	0.377
Nkx6.1(Homeobox)/Islet-Nkx6.1-ChIP-Seq(GSE40975)/Homer	GKTAATGR	1	-0.1613	1	256	0.9275	3747.3	0.941
CEBP:CEBP(bZIP)/MEF-Chop-ChIP-Seq(GSE35681)/Homer	NTNATGCAAYMNNHTGMAAY	1	-0.1578	1	39	0.1413	651.8	0.1637
Smad2(MAD)/ES-SMAD2-ChIP-Seq(GSE29422)/Homer	CTGTCTGG	1	-0.1568	1	186	0.6739	2796.2	0.7022
GLI3(Zf)/Limb-GLI3-ChIP-Chip(GSE11077)/Homer	CGTGGGTGGTCC	1	-0.1486	1	18	0.0652	325.6	0.0818
SeqBias: TA-repeat	TATATATATA	1	-0.1427	1	268	0.971	3899.6	0.9793
T1ISRE(IRF)/ThioMac-Ifnb-Expression/Homer	ACTTTCGTTTCT	1	-0.1427	1	1	0.0036	29.7	0.0075
SUT1?/SacCer-Promoters/Homer	CCCCGCGC	1	-0.1395	1	269	0.9746	3911.1	0.9822
Meis1(Homeobox)/MastCells-Meis1-ChIP-Seq(GSE48085)/Homer	VGCTGWCAVB	1	-0.1349	1	204	0.7391	3056.4	0.7675
PAX5(Paired,Homeobox),condensed/GM12878-PAX5-ChIP-Seq(GSE32465)/Homer	GTCACGCTCSCTGM	1	-0.1293	1	16	0.058	298.9	0.0751
CEBP:AP1(bZIP)/ThioMac-CEBPb-ChIP-Seq(GSE21512)/Homer	DRTGTTGCAA	1	-0.1254	1	141	0.5109	2173.9	0.5459
Atf4(bZIP)/MEF-Atf4-ChIP-Seq(GSE35681)/Homer	MTGATGCAAT	1	-0.1235	1	63	0.2283	1031	0.2589
Atf1(bZIP)/K562-ATF1-ChIP-Seq(GSE31477)/Homer	GATGACGTCA	1	-0.1219	1	151	0.5471	2318.2	0.5821
FOXP1(Forkhead)/H9-FOXP1-ChIP-Seq(GSE31006)/Homer	NYYTGTTTACHN	1	-0.1159	1	96	0.3478	1525.8	0.3832
Unknown3/Drosophila-Promoters/Homer	ACVAKCTGGCAGCGC	1	-0.1146	1	11	0.0399	219.4	0.0551
DREF/Drosophila-Promoters/Homer	AVYTATCGATAD	1	-0.107	1	1	0.0036	33.7	0.0085
Nkx2.1(Homeobox)/LungAC-Nkx2.1-ChIP-Seq(GSE43252)/Homer	RSCACTYRAG	1	-0.101	1	264	0.9565	3859.7	0.9693
Hnf1(Homeobox)/Liver-Foxa2-Chip-Seq(GSE25694)/Homer	GGTTAAWCATTAA	1	-0.1001	1	45	0.163	768.2	0.1929
Mef2a(MADS)/HL1-Mef2a.biotin-ChIP-Seq(GSE21529)/Homer	CYAAAAATAG	1	-0.097	1	169	0.6123	2588.3	0.65
Unknown-ESC-element(?)/mES-Nanog-ChIP-Seq(GSE11724)/Homer	CACAGCAGGGGG	1	-0.09363	1	78	0.2826	1272.2	0.3195
Myf5(bHLH)/GM-Myf5-ChIP-Seq(GSE24852)/Homer	BAACAGCTGT	1	-0.0861	1	93	0.337	1500.9	0.3769
PHA-4(Forkhead)/cElegans-Embryos-PHA4-ChIP-Seq(modEncode)/Homer	KTGTTTGC	1	-0.07738	1	265	0.9601	3876.4	0.9734
Foxo1(Forkhead)/RAW-Foxo1-ChIP-Seq(Fan et al.)/Homer	CTGTTTAC	1	-0.07618	1	227	0.8225	3397	0.8531
Unknown1(NR/Ini-like)/Drosophila-Promoters/Homer	MYGGTCACACTG	1	-0.0681	1	28	0.1014	519.3	0.1304
SeqBias: CA-repeat	CACACACACA	1	-0.06702	1	276	1	3981.5	0.9998
SeqBias: GA-repeat	GAGAGAGAGA	1	-0.06702	1	276	1	3981.5	0.9998
PAX3:FKHR-fusion(Paired,Homeobox)/Rh4-PAX3:FKHR-ChIP-Seq(GSE19063)/Homer	ACCRTGACTAATTNN	1	-0.06546	1	42	0.1522	743.6	0.1867
E2A(bHLH),near_PU.1/Bcell-PU.1-ChIP-Seq(GSE21512)/Homer	NVCACCTGBN	1	-0.06402	1	209	0.7572	3164.3	0.7946
Ptf1a(bHLH)/Panc1-Ptf1a-ChIP-Seq(GSE47459)/Homer	ACAGCTGTTN	1	-0.06357	1	249	0.9022	3688.1	0.9262
Pax7(Paired,Homeobox)/Myoblast-Pax7-ChIP-Seq(GSE25064)/Homer	TAATCAATTA	1	-0.06169	1	27	0.0978	507.5	0.1274
Foxh1(Forkhead)/hESC-FOXH1-ChIP-Seq(GSE29422)/Homer	NNTGTGGATTSS	1	-0.05777	1	120	0.4348	1920.8	0.4824
Six1(Homeobox)/Myoblast-Six1-ChIP-Chip(GSE20150)/Homer	GKVTCADRTTWC	1	-0.05619	1	46	0.1667	813.8	0.2044
Oct4:Sox17(POU,Homeobox,HMG)/F9-Sox17-ChIP-Seq(GSE44553)/Homer	CCATTGTATGCAAAT	1	-0.05452	1	33	0.1196	609.7	0.1531
Gfi1b(Zf)/HPC7-Gfi1b-ChIP-Seq(GSE22178)/Homer	MAATCACTGC	1	-0.05201	1	158	0.5725	2470.3	0.6203
LXRE(NR),DR4/RAW-LXRb.biotin-ChIP-Seq(GSE21512)/Homer	RGGTTACTANAGGTCA	1	-0.05006	1	54	0.1957	943.6	0.2369
RUNX1(Runt)/Jurkat-RUNX1-ChIP-Seq(GSE29180)/Homer	AAACCACARM	1	-0.04988	1	149	0.5399	2345.6	0.589
Unknown2/Drosophila-Promoters/Homer	CATCMCTA	1	-0.03832	1	182	0.6594	2821.5	0.7085
Nanog(Homeobox)/mES-Nanog-ChIP-Seq(GSE11724)/Homer	RGCCATTAAC	1	-0.03738	1	273	0.9891	3965.4	0.9958
Chop(bZIP)/MEF-Chop-ChIP-Seq(GSE35681)/Homer	ATTGCATCAT	1	-0.03292	1	47	0.1703	854.1	0.2145
SCL(bHLH)/HPC7-Scl-ChIP-Seq(GSE13511)/Homer	AVCAGCTG	1	-0.03051	1	267	0.9674	3912.9	0.9826
Ascl1(bHLH)/NeuralTubes-Ascl1-ChIP-Seq(GSE55840)/Homer	NNVVCAGCTGBN	1	-0.02404	1	180	0.6522	2817	0.7074
PRDM9(Zf)/Testis-DMC1-ChIP-Seq(GSE35498)/Homer	ADGGYAGYAGCATCT	1	-0.01798	1	64	0.2319	1147.4	0.2881
MyoD(bHLH)/Myotube-MyoD-ChIP-Seq(GSE21614)/Homer	RRCAGCTGYTSY	1	-0.01312	1	86	0.3116	1497.1	0.3759
Tal1	CATCTG	1	-0.01077	1	178	0.6449	2824.2	0.7092
GEI-11(Myb?)/cElegans-L4-GEI11-ChIP-Seq(modEncode)/Homer	CCGACAYYTYACGGG	1	-0.01062	1	3	0.0109	121.9	0.0306
E2A(bHLH)/proBcell-E2A-ChIP-Seq(GSE21978)/Homer	DNRCAGCTGY	1	-0.008982	1	201	0.7283	3139.5	0.7884
Tcf12(bHLH)/GM12878-Tcf12-ChIP-Seq(GSE32465)/Homer	VCAGCTGYTG	1	-0.007572	1	112	0.4058	1908.9	0.4794
MyoG(bHLH)/C2C12-MyoG-ChIP-Seq(GSE36024)/Homer	AACAGCTG	1	-0.004395	1	122	0.442	2077.6	0.5217
GATA(Zf),IR3/iTreg-Gata3-ChIP-Seq(GSE20898)/Homer	NNNNNBAGATAWYATCTVHN	1	-0.003887	1	33	0.1196	709.1	0.1781
Mef2c(MADS)/GM12878-Mef2c-ChIP-Seq(GSE32465)/Homer	DCYAAAAATAGM	1	-0.003595	1	171	0.6196	2773	0.6963
Ap4(bHLH)/AML-Tfap4-ChIP-Seq(GSE45738)/Homer	NAHCAGCTGD	1	-0.001334	1	135	0.4891	2310.5	0.5802
LIN-15B(Zf)/cElegans-L3-LIN15B-ChIP-Seq(modEncode)/Homer	CARTGGAGCGCRYTTGCATT	1	0	1	0	0	11.6	0.0029
SeqBias: GCW-triplet	GCWGCWGCWGCW	1	0	1	276	1	3982.2	1
Ik-1	NHTTGGGAATRCC	1	0	1	276	1	3982.2	1
SeqBias: polyC-repeat	CCCCCCCCCC	1	0	1	276	1	3982.2	1
SeqBias: polyA-repeat	AAAAAAAAAA	1	0	1	276	1	3982.2	1
SeqBias: C/A-bias	MMMMMMMMMM	1	0	1	276	1	3982.2	1
SeqBias: G/A bias	RRRRRRRRRR	1	0	1	276	1	3982.2	1

## Sheet: Mouse
# Supplemental Table S5: motif enrichment analysis in mouse expressed retrocopies
# The 2 kb upstream of all expressed retrocopies were analysed for motif enrichment by comparing them with the 2 kb upstream of not expressed retrocopies
Motif Name	Consensus	P-value	Log P-value	q-value (Benjamini)	# of Target Sequences with Motif(of 264)	% of Target Sequences with Motif	# of Background Sequences with Motif(of 4836)	% of Background Sequences with Motif
Sp1(Zf)/Promoter/Homer	GGCCCCGCCCCC	1e-11	-26.4	0	61	0.2061	338.1	0.0742
JunD(bZIP)/K562-JunD-ChIP-Seq/Homer	ATGACGTCATCN	1e-05	-12.6	0.0004	40	0.1351	271.4	0.0595
NRF1(NRF)/MCF7-NRF1-ChIP-Seq(Unpublished)/Homer	CTGCGCATGCGC	1e-05	-12	0.0005	36	0.1216	237.8	0.0522
Atf2(bZIP)/3T3L1-Atf2-ChIP-Seq(GSE56872)/Homer	NRRTGACGTCAT	0.0001	-11.5	0.0007	92	0.3108	915.1	0.2008
Maz(Zf)/HepG2-Maz-ChIP-Seq(GSE31477)/Homer	GGGGGGGG	0.0001	-9.85	0.0028	206	0.6959	2650.5	0.5815
CEBP(bZIP)/ThioMac-CEBPb-ChIP-Seq(GSE21512)/Homer	ATTGCGCAAC	0.0001	-9.24	0.0043	170	0.5743	2101.1	0.4609
c-Jun-CRE(bZIP)/K562-cJun-ChIP-Seq(GSE31477)/Homer	ATGACGTCATCY	0.001	-8.24	0.0099	81	0.2736	851.7	0.1869
CRE(bZIP)/Promoter/Homer	CSGTGACGTCAC	0.001	-7.14	0.0261	51	0.1723	490.9	0.1077
PPARE(NR),DR1/3T3L1-Pparg-ChIP-Seq(GSE13511)/Homer	TGACCTTTGCCCCA	0.01	-5.67	0.1009	189	0.6385	2538.4	0.5569
Atf7(bZIP)/3T3L1-Atf7-ChIP-Seq(GSE56872)/Homer	NGRTGACGTCAY	0.01	-5.66	0.1009	113	0.3818	1386.2	0.3041
E2F4(E2F)/K562-E2F4-ChIP-Seq(GSE31477)/Homer	GGCGGGAAAH	0.01	-5.61	0.1009	59	0.1993	634.8	0.1393
Elk4(ETS)/Hela-Elk4-ChIP-Seq(GSE31477)/Homer	NRYTTCCGGY	0.01	-5.29	0.1105	116	0.3919	1445.8	0.3172
ERG(ETS)/VCaP-ERG-ChIP-Seq(GSE14097)/Homer	ACAGGAAGTG	0.01	-5.19	0.1132	250	0.8446	3565.9	0.7823
Rfx2(HTH)/LoVo-RFX2-ChIP-Seq(GSE49402)/Homer	GTTGCCATGGCAACM	0.01	-5	0.1275	29	0.098	267.6	0.0587
Elk1(ETS)/Hela-Elk1-ChIP-Seq(GSE31477)/Homer	HACTTCCGGY	0.01	-4.71	0.1589	114	0.3851	1442.3	0.3164
NRF(NRF)/Promoter/Homer	STGCGCATGCGC	0.01	-4.69	0.1589	41	0.1385	425.2	0.0933
E2F1(E2F)/Hela-E2F1-ChIP-Seq(GSE22478)/Homer	CWGGCGGGAA	0.01	-4.67	0.1589	35	0.1182	349.9	0.0768
Egr1(Zf)/K562-Egr1-ChIP-Seq(GSE32465)/Homer	TGCGTGGGYG	0.1	-4.59	0.1589	134	0.4527	1744.1	0.3826
ZBTB33(Zf)/GM12878-ZBTB33-ChIP-Seq(GSE32465)/Homer	GGVTCTCGCGAGAAC	0.1	-4.49	0.1589	10	0.0338	62.8	0.0138
E-box(bHLH)/Promoter/Homer	SSGGTCACGTGA	0.1	-4.25	0.1878	17	0.0574	140.7	0.0309
Gfi1b(Zf)/HPC7-Gfi1b-ChIP-Seq(GSE22178)/Homer	MAATCACTGC	0.1	-4.14	0.1999	153	0.5169	2055.8	0.451
CArG(MADS)/PUER-Srf-ChIP-Seq(Sullivan et al.)/Homer	CCATATATGGNM	0.1	-4.12	0.1999	93	0.3142	1164.3	0.2554
ETV1(ETS)/GIST48-ETV1-ChIP-Seq(GSE22441)/Homer	AACCGGAAGT	0.1	-4.11	0.1999	231	0.7804	3293	0.7224
Rfx5(HTH)/GM12878-Rfx5-ChIP-Seq(GSE31477)/Homer	SCCTAGCAACAG	0.1	-3.84	0.2365	106	0.3581	1367.3	0.3
NFAT(RHD)/Jurkat-NFATC1-ChIP-Seq(Jolma et al.)/Homer	ATTTTCCATT	0.1	-3.61	0.2859	200	0.6757	2818.1	0.6183
Tbet(T-box)/CD8-Tbet-ChIP-Seq(GSE33802)/Homer	AGGTGTGAAM	0.1	-3.59	0.2859	211	0.7128	2995.3	0.6571
Mef2c(MADS)/GM12878-Mef2c-ChIP-Seq(GSE32465)/Homer	DCYAAAAATAGM	0.1	-3.53	0.2863	142	0.4797	1922.4	0.4218
Hoxc9(Homeobox)/Ainv15-Hoxc9-ChIP-Seq(GSE21812)/Homer	GGCCATAAATCA	0.1	-3.44	0.3016	153	0.5169	2095.7	0.4598
EKLF(Zf)/Erythrocyte-Klf1-ChIP-Seq(GSE20478)/Homer	NWGGGTGTGGCY	0.1	-3.32	0.3278	53	0.1791	633.3	0.1389
ELF1(ETS)/Jurkat-ELF1-ChIP-Seq(SRA014231)/Homer	AVCCGGAAGT	0.1	-3.3	0.3278	106	0.3581	1396.5	0.3064
ETS(ETS)/Promoter/Homer	AACCGGAAGT	0.1	-3.23	0.3373	77	0.2601	977.2	0.2144
Rbpj1(?)/Panc1-Rbpj1-ChIP-Seq(GSE47459)/Homer	HTTTCCCASG	0.1	-3.22	0.3373	238	0.8041	3455.9	0.7582
Rfx1(HTH)/NPC-H3K4me1-ChIP-Seq(GSE16256)/Homer	KGTTGCCATGGCAA	0.1	-3.02	0.3893	53	0.1791	646.3	0.1418
Smad3(MAD)/NPC-Smad3-ChIP-Seq(GSE36673)/Homer	TWGTCTGV	0.1	-3.02	0.3893	290	0.9797	4374.2	0.9596
RFX(HTH)/K562-RFX3-ChIP-Seq(SRA012198)/Homer	CGGTTGCCATGGCAAC	0.1	-2.99	0.3893	22	0.0743	228.5	0.0501
HOXA9(Homeobox)/HSC-Hoxa9-ChIP-Seq(GSE33509)/Homer	GGCCATAAATCA	0.1	-2.86	0.4209	178	0.6014	2519.3	0.5527
Fli1(ETS)/CD8-FLI-ChIP-Seq(GSE20898)/Homer	NRYTTCCGGH	0.1	-2.84	0.4209	194	0.6554	2772	0.6081
PU.1(ETS)/ThioMac-PU.1-ChIP-Seq(GSE21512)/Homer	AGAGGAAGTG	0.1	-2.79	0.425	124	0.4189	1696.6	0.3722
AP-2alpha(AP2)/Hela-AP2alpha-ChIP-Seq(GSE31477)/Homer	ATGCCCTGAGGC	0.1	-2.78	0.425	115	0.3885	1562.7	0.3428
Foxh1(Forkhead)/hESC-FOXH1-ChIP-Seq(GSE29422)/Homer	NNTGTGGATTSS	0.1	-2.74	0.425	160	0.5405	2248.6	0.4933
Stat3(Stat)/mES-Stat3-ChIP-Seq(GSE11431)/Homer	CTTCCGGGAA	0.1	-2.72	0.4259	115	0.3885	1566.5	0.3437
CEBP:CEBP(bZIP)/MEF-Chop-ChIP-Seq(GSE35681)/Homer	NTNATGCAAYMNNHTGMAAY	0.1	-2.68	0.4311	53	0.1791	662.7	0.1454
ETS1(ETS)/Jurkat-ETS1-ChIP-Seq(GSE17954)/Homer	ACAGGAAGTG	0.1	-2.63	0.4431	196	0.6622	2817.2	0.618
AP-1(bZIP)/ThioMac-PU.1-ChIP-Seq(GSE21512)/Homer	VTGACTCATC	0.1	-2.63	0.4431	154	0.5203	2164.6	0.4749
Klf4(Zf)/mES-Klf4-ChIP-Seq(GSE11431)/Homer	GCCACACCCA	0.1	-2.52	0.4716	80	0.2703	1060.8	0.2327
RUNX2(Runt)/PCa-RUNX2-ChIP-Seq(GSE33889)/Homer	NWAACCACADNN	0.1	-2.51	0.4716	194	0.6554	2794.4	0.613
Atf1(bZIP)/K562-ATF1-ChIP-Seq(GSE31477)/Homer	GATGACGTCA	0.1	-2.49	0.4716	140	0.473	1960	0.43
FXR(NR),IR1/Liver-FXR-ChIP-Seq(Chong et al.)/Homer	AGGTCANTGACCTB	0.1	-2.47	0.4716	78	0.2635	1034.1	0.2269
EBNA1(EBV virus)/Raji-EBNA1-ChIP-Seq(GSE30709)/Homer	GGYAGCAYDTGCTDCCCNNN	0.1	-2.45	0.4716	5	0.0169	34.1	0.0075
HRE(HSF)/HepG2-HSF1-ChIP-Seq(GSE31477)/Homer	BSTTCTRGAABVTTCYAGAA	0.1	-2.41	0.4763	41	0.1385	506.4	0.1111
Lhx2(Homeobox)/HFSC-Lhx2-ChIP-Seq(GSE48068)/Homer	TAATTAGN	0.1	-2.33	0.5019	227	0.7669	3331.1	0.7308
E2F6(E2F)/Hela-E2F6-ChIP-Seq(GSE31477)/Homer	GGCGGGAARN	1	-2.3	0.5097	74	0.25	986.6	0.2164
STAT6(Stat)/CD4-Stat6-ChIP-Seq(GSE22104)/Homer	ABTTCYYRRGAA	1	-2.27	0.5124	144	0.4865	2037.1	0.4469
Reverb(NR),DR2/RAW-Reverba.biotin-ChIP-Seq(GSE45914)/Homer	GTRGGTCASTGGGTCA	1	-2.17	0.5594	32	0.1081	391.7	0.0859
TR4(NR),DR1/Hela-TR4-ChIP-Seq(GSE24685)/Homer	GAGGTCAAAGGTCA	1	-2.15	0.5608	31	0.1047	378.8	0.0831
GABPA(ETS)/Jurkat-GABPa-ChIP-Seq(GSE17954)/Homer	RACCGGAAGT	1	-2.15	0.5608	167	0.5642	2401.6	0.5269
Egr2(Zf)/Thymocytes-Egr2-ChIP-Seq(GSE34254)/Homer	NGCGTGGGCGGR	1	-2.12	0.5608	48	0.1622	620.6	0.1361
bHLHE40(bHLH)/HepG2-BHLHE40-ChIP-Seq(GSE31477)/Homer	KCACGTGMCN	1	-2.11	0.5608	53	0.1791	692.9	0.152
NF-E2(bZIP)/K562-NFE2-ChIP-Seq(GSE31477)/Homer	GATGACTCAGCA	1	-2.1	0.5608	17	0.0574	189.2	0.0415
Gata1(Zf)/K562-GATA1-ChIP-Seq(GSE18829)/Homer	SAGATAAGRV	1	-2.09	0.5608	149	0.5034	2128.1	0.4669
E2F(E2F)/Hela-CellCycle-Expression/Homer	TTSGCGCGAAAA	1	-2.07	0.5608	10	0.0338	99.5	0.0218
GATA3(Zf),DR8/iTreg-Gata3-ChIP-Seq(GSE20898)/Homer	AGATSTNDNNDSAGATAASN	1	-2.06	0.5608	37	0.125	466.9	0.1024
BATF(bZIP)/Th17-BATF-ChIP-Seq(GSE39756)/Homer	DATGASTCAT	1	-2.06	0.5608	141	0.4764	2008.6	0.4407
Pit1(Homeobox)/GCrat-Pit1-ChIP-Seq(GSE58009)/Homer	ATGMATATDC	1	-2.03	0.5608	237	0.8007	3513.7	0.7709
Bcl6(Zf)/Liver-Bcl6-ChIP-Seq(GSE31578)/Homer	NNNCTTTCCAGGAAA	1	-2.02	0.5608	249	0.8412	3709	0.8137
ETS:RUNX(ETS,Runt)/Jurkat-RUNX1-ChIP-Seq(GSE17954)/Homer	RCAGGATGTGGT	1	-1.94	0.5728	22	0.0743	262.5	0.0576
KLF5(Zf)/LoVo-KLF5-ChIP-Seq(GSE49402)/Homer	DGGGYGKGGC	1	-1.91	0.5851	189	0.6385	2763.7	0.6063
c-Myc(bHLH)/LNCAP-cMyc-ChIP-Seq(Unpublished)/Homer	VCCACGTG	1	-1.9	0.5851	70	0.2365	954.8	0.2095
Olig2(bHLH)/Neuron-Olig2-ChIP-Seq(GSE30882)/Homer	RCCATMTGTT	1	-1.89	0.5851	268	0.9054	4029.3	0.884
Nrf2(bZIP)/Lymphoblast-Nrf2-ChIP-Seq(GSE37589)/Homer	HTGCTGAGTCAT	1	-1.89	0.5851	15	0.0507	169.9	0.0373
STAT6(Stat)/Macrophage-Stat6-ChIP-Seq(GSE38377)/Homer	TTCCKNAGAA	1	-1.88	0.5851	140	0.473	2008.7	0.4407
Sox6(HMG)/Myotubes-Sox6-ChIP-Seq(GSE32627)/Homer	CCATTGTTNY	1	-1.88	0.5851	262	0.8851	3930.9	0.8624
MYB(HTH)/ERMYB-Myb-ChIPSeq(GSE22095)/Homer	GGCVGTTR	1	-1.88	0.5851	254	0.8581	3799.9	0.8336
RXR(NR),DR1/3T3L1-RXR-ChIP-Seq(GSE13511)/Homer	TAGGGCAAAGGTCA	1	-1.83	0.5851	188	0.6351	2754.8	0.6044
Isl1(Homeobox)/Neuron-Isl1-ChIP-Seq(GSE31456)/Homer	CTAATKGV	1	-1.82	0.5851	275	0.9291	4150.8	0.9106
Bach1(bZIP)/K562-Bach1-ChIP-Seq(GSE31477)/Homer	AWWNTGCTGAGTCAT	1	-1.81	0.5851	16	0.0541	185.2	0.0406
Tcfcp2l1(CP2)/mES-Tcfcp2l1-ChIP-Seq(GSE11431)/Homer	NRAACCRGTTYRAACCRGYT	1	-1.81	0.5851	36	0.1216	465.5	0.1021
EWS:FLI1-fusion(ETS)/SK_N_MC-EWS:FLI1-ChIP-Seq(SRA014231)/Homer	VACAGGAAAT	1	-1.8	0.5851	122	0.4122	1741.7	0.3821
NPAS2(bHLH)/Liver-NPAS2-ChIP-Seq(GSE39860)/Homer	KCCACGTGAC	1	-1.77	0.5851	193	0.652	2838	0.6226
Atf3(bZIP)/GBM-ATF3-ChIP-Seq(GSE33912)/Homer	DATGASTCATHN	1	-1.73	0.5852	137	0.4628	1976.5	0.4336
Fra1(bZIP)/BT549-Fra1-ChIP-Seq(GSE46166)/Homer	NNATGASTCATH	1	-1.69	0.5987	119	0.402	1705.1	0.3741
EHF(ETS)/LoVo-EHF-ChIP-Seq(GSE49402)/Homer	AVCAGGAAGT	1	-1.69	0.5987	231	0.7804	3443.1	0.7554
AR-halfsite(NR)/LNCaP-AR-ChIP-Seq(GSE27824)/Homer	CCAGGAACAG	1	-1.66	0.6048	295	0.9966	4510.6	0.9896
EBF1(EBF)/Near-E2A-ChIP-Seq(GSE21512)/Homer	GTCCCCWGGGGA	1	-1.63	0.6148	154	0.5203	2246.5	0.4929
AMYB(HTH)/Testes-AMYB-ChIP-Seq(GSE44588)/Homer	TGGCAGTTGG	1	-1.63	0.6148	237	0.8007	3544.7	0.7777
SPDEF(ETS)/VCaP-SPDEF-ChIP-Seq(SRA014231)/Homer	ASWTCCTGBT	1	-1.62	0.6148	194	0.6554	2867.8	0.6292
Six1(Homeobox)/Myoblast-Six1-ChIP-Chip(GSE20150)/Homer	GKVTCADRTTWC	1	-1.6	0.6148	74	0.25	1036.7	0.2274
OCT4-SOX2-TCF-NANOG(POU,Homeobox,HMG)/mES-Oct4-ChIP-Seq(GSE11431)/Homer	ATTTGCATAACAATG	1	-1.57	0.624	79	0.2669	1113.4	0.2443
GATA(Zf),IR3/iTreg-Gata3-ChIP-Seq(GSE20898)/Homer	NNNNNBAGATAWYATCTVHN	1	-1.55	0.6284	50	0.1689	684.1	0.1501
AP-2gamma(AP2)/MCF7-TFAP2C-ChIP-Seq(GSE21234)/Homer	SCCTSAGGSCAW	1	-1.55	0.6284	138	0.4662	2009.1	0.4408
HRE(HSF)/Striatum-HSF1-ChIP-Seq(GSE38000)/Homer	TTCTAGAABNTTCTA	1	-1.54	0.6284	59	0.1993	818.6	0.1796
Nur77(NR)/K562-NR4A1-ChIP-Seq(GSE31363)/Homer	TGACCTTTNCNT	1	-1.49	0.6461	56	0.1892	777.9	0.1707
Esrrb(NR)/mES-Esrrb-ChIP-Seq(GSE11431)/Homer	KTGACCTTGA	1	-1.45	0.6665	142	0.4797	2080.3	0.4564
CHR(?)/Hela-CellCycle-Expression/Homer	SRGTTTCAAA	1	-1.43	0.6729	165	0.5574	2436	0.5344
HIF-1b(HLH)/T47D-HIF1b-ChIP-Seq(GSE59937)/Homer	RTACGTGC	1	-1.42	0.6729	170	0.5743	2514.4	0.5516
Sox2(HMG)/mES-Sox2-ChIP-Seq(GSE11431)/Homer	BCCATTGTTC	1	-1.4	0.6775	200	0.6757	2982.3	0.6543
X-box(HTH)/NPC-H3K4me1-ChIP-Seq(GSE16256)/Homer	GGTTGCCATGGCAA	1	-1.4	0.6775	27	0.0912	358.6	0.0787
GSC(Homeobox)/FrogEmbryos-GSC-ChIP-Seq(DRA000576)/Homer	RGGATTAR	1	-1.4	0.6775	242	0.8176	3643.9	0.7994
Pax7(Paired,Homeobox),longest/Myoblast-Pax7-ChIP-Seq(GSE25064)/Homer	NTAATTDGCYAATTANNWWD	1	-1.39	0.6775	16	0.0541	201.9	0.0443
TATA-Box(TBP)/Promoter/Homer	CCTTTTAWAGSC	1	-1.38	0.6775	247	0.8345	3724.1	0.817
GRE(NR),IR3/A549-GR-ChIP-Seq(GSE32465)/Homer	NRGVACABNVTGTYCY	1	-1.36	0.6775	35	0.1182	477.3	0.1047
CRX(Homeobox)/Retina-Crx-ChIP-Seq(GSE20012)/Homer	GCTAATCC	1	-1.36	0.6775	283	0.9561	4308.1	0.9451
TEAD4(TEA)/Tropoblast-Tead4-ChIP-Seq(GSE37350)/Homer	CCWGGAATGY	1	-1.36	0.6775	172	0.5811	2552.7	0.56
PRDM14(Zf)/H1-PRDM14-ChIP-Seq(GSE22767)/Homer	RGGTCTCTAACY	1	-1.35	0.6775	83	0.2804	1193.4	0.2618
Stat3+il21(Stat)/CD4-Stat3-ChIP-Seq(GSE19198)/Homer	SVYTTCCNGGAARB	1	-1.33	0.6775	153	0.5169	2262.1	0.4963
ETS:E-box(ETS,bHLH)/HPC7-Scl-ChIP-Seq(GSE22178)/Homer	AGGAARCAGCTG	1	-1.28	0.6942	23	0.0777	307.5	0.0675
GATA:SCL(Zf,bHLH)/Ter119-SCL-ChIP-Seq(GSE18720)/Homer	CRGCTGBNGNSNNSAGATAA	1	-1.28	0.6942	28	0.0946	380.8	0.0836
Otx2(Homeobox)/EpiLC-Otx2-ChIP-Seq(GSE56098)/Homer	NYTAATCCYB	1	-1.26	0.6942	199	0.6723	2981.4	0.6541
Gata2(Zf)/K562-GATA2-ChIP-Seq(GSE18829)/Homer	BBCTTATCTS	1	-1.26	0.6942	159	0.5372	2362.7	0.5183
LXRE(NR),DR4/RAW-LXRb.biotin-ChIP-Seq(GSE21512)/Homer	RGGTTACTANAGGTCA	1	-1.26	0.6942	11	0.0372	136.8	0.03
Sox10(HMG)/SciaticNerve-Sox3-ChIP-Seq(GSE35132)/Homer	CCWTTGTYYB	1	-1.25	0.6942	258	0.8716	3910.4	0.8579
SCL(bHLH)/HPC7-Scl-ChIP-Seq(GSE13511)/Homer	AVCAGCTG	1	-1.24	0.6942	295	0.9966	4519.2	0.9914
Mef2a(MADS)/HL1-Mef2a.biotin-ChIP-Seq(GSE21529)/Homer	CYAAAAATAG	1	-1.2	0.7008	116	0.3919	1709.7	0.3751
ELF5(ETS)/T47D-ELF5-ChIP-Seq(GSE30407)/Homer	ACVAGGAAGT	1	-1.19	0.7061	158	0.5338	2355.2	0.5167
STAT5(Stat)/mCD4+-Stat5-ChIP-Seq(GSE12346)/Homer	RTTTCTNAGAAA	1	-1.08	0.7804	89	0.3007	1312.8	0.288
CEBP:AP1(bZIP)/ThioMac-CEBPb-ChIP-Seq(GSE21512)/Homer	DRTGTTGCAA	1	-1.08	0.7804	161	0.5439	2415.1	0.5298
GRE(NR),IR3/RAW264.7-GRE-ChIP-Seq(Unpublished)/Homer	VAGRACAKWCTGTYC	1	-1.02	0.811	66	0.223	969.6	0.2127
GFX(?)/Promoter/Homer	ATTCTCGCGAGA	1	-1.02	0.811	3	0.0101	32.6	0.0071
Srebp2(bHLH)/HepG2-Srebp2-ChIP-Seq(GSE31477)/Homer	CGGTCACSCCAC	1	-1.01	0.811	26	0.0878	368.6	0.0809
EWS:ERG-fusion(ETS)/CADO_ES1-EWS:ERG-ChIP-Seq(SRA014231)/Homer	ATTTCCTGTN	1	-1	0.811	157	0.5304	2363.8	0.5186
MITF(bHLH)/MastCells-MITF-ChIP-Seq(GSE48085)/Homer	RTCATGTGAC	1	-1	0.811	171	0.5777	2580	0.566
T1ISRE(IRF)/ThioMac-Ifnb-Expression/Homer	ACTTTCGTTTCT	1	-0.987	0.811	6	0.0203	75.3	0.0165
Srebp1a(bHLH)/HepG2-Srebp1a-ChIP-Seq(GSE31477)/Homer	RTCACSCCAY	1	-0.955	0.8258	44	0.1486	643.9	0.1413
Gata4(Zf)/Heart-Gata4-ChIP-Seq(GSE35151)/Homer	NBWGATAAGR	1	-0.951	0.8258	211	0.7128	3204.8	0.7031
Pitx1(Homeobox)/Chicken-Pitx1-ChIP-Seq(GSE38910)/Homer	TAATCCCN	1	-0.945	0.8258	296	1	4543	0.9967
STAT4(Stat)/CD4-Stat4-ChIP-Seq(GSE22104)/Homer	NYTTCCWGGAAR	1	-0.923	0.8325	193	0.652	2929.5	0.6427
VDR(NR),DR3/GM10855-VDR+vitD-ChIP-Seq(GSE22484)/Homer	ARAGGTCANWGAGTTCANNN	1	-0.878	0.8643	51	0.1723	757.9	0.1663
BMAL1(bHLH)/Liver-Bmal1-ChIP-Seq(GSE39860)/Homer	GNCACGTG	1	-0.863	0.87	257	0.8682	3929.4	0.8621
HNF4a(NR),DR1/HepG2-HNF4a-ChIP-Seq(GSE25021)/Homer	CARRGKBCAAAGTYCA	1	-0.861	0.87	108	0.3649	1630.7	0.3578
NeuroD1(bHLH)/Islet-NeuroD1-ChIP-Seq(GSE30298)/Homer	GCCATCTGTT	1	-0.844	0.8735	146	0.4932	2216.7	0.4863
PBX1(Homeobox)/MCF7-PBX1-ChIP-Seq(GSE28007)/Homer	GSCTGTCACTCA	1	-0.826	0.8823	17	0.0574	247	0.0542
Ets1-distal(ETS)/CD4+-PolII-ChIP-Seq(Barski et al.)/Homer	MACAGGAAGT	1	-0.815	0.8851	69	0.2331	1039.3	0.228
Phox2a(Homeobox)/Neuron-Phox2a-ChIP-Seq(GSE31456)/Homer	YTAATYNRATTA	1	-0.776	0.9134	129	0.4358	1965.9	0.4313
ZNF143|STAF(Zf)/CUTLL-ZNF143-ChIP-Seq(GSE29600)/Homer	ATTTCCCAGVAKSCY	1	-0.759	0.9226	91	0.3074	1384.6	0.3038
TEAD2(TEA)/Py2T-Tead2-ChIP-Seq(GSE55709)/Homer	CCWGGAATGY	1	-0.753	0.9226	119	0.402	1815.8	0.3984
Unknown(Homeobox)/Limb-p300-ChIP-Seq/Homer	SSCMATWAAA	1	-0.743	0.9238	175	0.5912	2678.2	0.5876
RUNX(Runt)/HPC7-Runx1-ChIP-Seq(GSE22178)/Homer	SAAACCACAG	1	-0.733	0.9261	158	0.5338	2418.8	0.5307
PAX5(Paired,Homeobox)/GM12878-PAX5-ChIP-Seq(GSE32465)/Homer	GCAGCCAAGCRTGACH	1	-0.73	0.9261	68	0.2297	1035.9	0.2273
GATA(Zf),IR4/iTreg-Gata3-ChIP-Seq(GSE20898)/Homer	NAGATWNBNATCTNN	1	-0.705	0.9382	26	0.0878	393.3	0.0863
PRDM1(Zf)/Hela-PRDM1-ChIP-Seq(GSE31477)/Homer	ACTTTCACTTTC	1	-0.699	0.9382	146	0.4932	2239.6	0.4913
Pax7(Paired,Homeobox),long/Myoblast-Pax7-ChIP-Seq(GSE25064)/Homer	TAATCHGATTAC	1	-0.688	0.9413	9	0.0304	133.4	0.0293
STAT1(Stat)/HelaS3-STAT1-ChIP-Seq(GSE12782)/Homer	NATTTCCNGGAAAT	1	-0.684	0.9413	77	0.2601	1180.3	0.2589
NF1-halfsite(CTF)/LNCaP-NF1-ChIP-Seq(Unpublished)/Homer	YTGCCAAG	1	-0.669	0.9455	231	0.7804	3551.5	0.7791
Nkx6.1(Homeobox)/Islet-Nkx6.1-ChIP-Seq(GSE40975)/Homer	GKTAATGR	1	-0.666	0.9455	285	0.9628	4380.1	0.9609
Tcf4(HMG)/Hct116-Tcf4-ChIP-Seq(SRA012054)/Homer	ASATCAAAGGVA	1	-0.648	0.9524	128	0.4324	1971.2	0.4324
p53(p53)/Saos-p53-ChIP-Seq/Homer	RRCATGYCYRGRCATGYYYN	1	-0.64	0.9524	25	0.0845	384.2	0.0843
p53(p53)/Saos-p53-ChIP-Seq(GSE15780)/Homer	RRCATGYCYRGRCATGYYYN	1	-0.64	0.9524	25	0.0845	384.2	0.0843
GFY-Staf(?,Zf)/Promoter/Homer	RACTACAATTCCCAGAAKGC	1	-0.635	0.9524	16	0.0541	245.9	0.0539
Tcf12(bHLH)/GM12878-Tcf12-ChIP-Seq(GSE32465)/Homer	VCAGCTGYTG	1	-0.63	0.9524	140	0.473	2159.6	0.4738
USF1(bHLH)/GM12878-Usf1-ChIP-Seq(GSE32465)/Homer	SGTCACGTGR	1	-0.627	0.9524	77	0.2601	1189.7	0.261
Arnt:Ahr(bHLH)/MCF7-Arnt-ChIP-Seq(Lo et al.)/Homer	TBGCACGCAA	1	-0.62	0.9524	103	0.348	1591.1	0.3491
Tlx?(NR)/NPC-H3K4me1-ChIP-Seq(GSE16256)/Homer	CTGGCAGSCTGCCA	1	-0.617	0.9524	71	0.2399	1098.2	0.2409
SpiB(ETS)/OCILY3-SPIB-ChIP-Seq(GSE56857)/Homer	AAAGRGGAAGTG	1	-0.608	0.9524	59	0.1993	914.3	0.2006
Oct4:Sox17(POU,Homeobox,HMG)/F9-Sox17-ChIP-Seq(GSE44553)/Homer	CCATTGTATGCAAAT	1	-0.589	0.9524	45	0.152	700.5	0.1537
IRF4(IRF)/GM12878-IRF4-ChIP-Seq(GSE32465)/Homer	ACTGAAACCA	1	-0.584	0.9524	104	0.3514	1613.9	0.3541
Fox:Ebox(Forkhead,bHLH)/Panc1-Foxa2-ChIP-Seq(GSE47459)/Homer	NNNVCTGWGYAAACASN	1	-0.58	0.9524	203	0.6858	3137	0.6882
Sox3(HMG)/NPC-Sox3-ChIP-Seq(GSE33059)/Homer	CCWTTGTY	1	-0.56	0.9604	262	0.8851	4040.1	0.8863
BMYB(HTH)/Hela-BMYB-ChIP-Seq(GSE27030)/Homer	NHAACBGYYV	1	-0.547	0.9672	231	0.7804	3570.5	0.7833
Erra(NR)/HepG2-Erra-ChIP-Seq(GSE31477)/Homer	CAAAGGTCAG	1	-0.538	0.9698	263	0.8885	4058.8	0.8904
FOXA1(Forkhead)/LNCAP-FOXA1-ChIP-Seq(GSE27824)/Homer	WAAGTAAACA	1	-0.522	0.9795	249	0.8412	3848.9	0.8444
ERE(NR),IR3/MCF7-ERa-ChIP-Seq(Unpublished)/Homer	VAGGTCACNSTGACC	1	-0.517	0.9795	60	0.2027	944.5	0.2072
Tbx5(T-box)/HL1-Tbx5.biotin-ChIP-Seq(GSE21529)/Homer	AGGTGTCA	1	-0.515	0.9795	285	0.9628	4391.4	0.9634
IRF2(IRF)/Erythroblas-IRF2-ChIP-Seq(GSE36985)/Homer	GAAASYGAAASY	1	-0.512	0.9795	25	0.0845	398.3	0.0874
GATA3(Zf)/iTreg-Gata3-ChIP-Seq(GSE20898)/Homer	AGATAASR	1	-0.486	0.9897	246	0.8311	3808.6	0.8355
Pax7(Paired,Homeobox)/Myoblast-Pax7-ChIP-Seq(GSE25064)/Homer	TAATCAATTA	1	-0.483	0.9897	35	0.1182	559.7	0.1228
Meis1(Homeobox)/MastCells-Meis1-ChIP-Seq(GSE48085)/Homer	VGCTGWCAVB	1	-0.477	0.9897	236	0.7973	3658.1	0.8025
Smad4(MAD)/ESC-SMAD4-ChIP-Seq(GSE29422)/Homer	VBSYGTCTGG	1	-0.476	0.9897	229	0.7736	3552.7	0.7794
Atf4(bZIP)/MEF-Atf4-ChIP-Seq(GSE35681)/Homer	MTGATGCAAT	1	-0.466	0.9897	65	0.2196	1031.6	0.2263
Bach2(bZIP)/OCILy7-Bach2-ChIP-Seq(GSE44420)/Homer	TGCTGAGTCA	1	-0.447	0.9991	37	0.125	596.1	0.1308
Sox4(HMG)/proB-Sox4-ChIP-Seq(GSE50066)/Homer	YCTTTGTTCC	1	-0.428	1	177	0.598	2769.4	0.6076
NF1(CTF)/LNCAP-NF1-ChIP-Seq(Unpublished)/Homer	CYTGGCABNSTGCCAR	1	-0.428	1	61	0.2061	976.2	0.2142
Eomes(T-box)/H9-Eomes-ChIP-Seq(GSE26097)/Homer	ATTAACACCT	1	-0.415	1	270	0.9122	4179.7	0.917
HNF6(Homeobox)/Liver-Hnf6-ChIP-Seq(ERP000394)/Homer	NTATYGATCH	1	-0.411	1	130	0.4392	2051.1	0.45
Nkx3.1(Homeobox)/LNCaP-Nkx3.1-ChIP-Seq(GSE28264)/Homer	AAGCACTTAA	1	-0.407	1	278	0.9392	4298.9	0.9431
p63(p53)/Keratinocyte-p63-ChIP-Seq(GSE17611)/Homer	NNDRCATGYCYNRRCATGYH	1	-0.395	1	72	0.2432	1156	0.2536
TCFL2(HMG)/K562-TCF7L2-ChIP-Seq(GSE29196)/Homer	ACWTCAAAGG	1	-0.377	1	21	0.0709	352.2	0.0773
REST-NRSF(Zf)/Jurkat-NRSF-ChIP-Seq/Homer	GGMGCTGTCCATGGTGCTGA	1	-0.359	1	1	0.0034	18.9	0.0041
PU.1-IRF(ETS:IRF)/Bcell-PU.1-ChIP-Seq(GSE21512)/Homer	MGGAAGTGAAAC	1	-0.357	1	228	0.7703	3561.5	0.7813
NFY(CCAAT)/Promoter/Homer	RGCCAATSRG	1	-0.355	1	166	0.5608	2619.1	0.5746
Pit1+1bp(Homeobox)/GCrat-Pit1-ChIP-Seq(GSE58009)/Homer	ATGCATAATTCA	1	-0.354	1	107	0.3615	1710.3	0.3752
BORIS(Zf)/K562-CTCFL-ChIP-Seq(GSE32465)/Homer	CNNBRGCGCCCCCTGSTGGC	1	-0.354	1	47	0.1588	771.8	0.1693
Nr5a2(NR)/Pancreas-LRH1-ChIP-Seq(GSE34295)/Homer	BTCAAGGTCA	1	-0.348	1	146	0.4932	2314.1	0.5077
PAX5(Paired,Homeobox),condensed/GM12878-PAX5-ChIP-Seq(GSE32465)/Homer	GTCACGCTCSCTGM	1	-0.328	1	17	0.0574	294.1	0.0645
Pbx3(Homeobox)/GM12878-PBX3-ChIP-Seq(GSE32465)/Homer	SCTGTCAMTCAN	1	-0.326	1	47	0.1588	777.5	0.1706
Usf2(bHLH)/C2C12-Usf2-ChIP-Seq(GSE36030)/Homer	GTCACGTGGT	1	-0.306	1	58	0.1959	956.5	0.2098
Unknown-ESC-element(?)/mES-Nanog-ChIP-Seq(GSE11724)/Homer	CACAGCAGGGGG	1	-0.302	1	90	0.3041	1460.6	0.3204
Fosl2(bZIP)/3T3L1-Fosl2-ChIP-Seq(GSE56872)/Homer	NATGASTCABNN	1	-0.296	1	61	0.2061	1006.7	0.2209
CLOCK(bHLH)/Liver-Clock-ChIP-Seq(GSE39860)/Homer	GHCACGTG	1	-0.283	1	92	0.3108	1497.1	0.3284
Hoxb4(Homeobox)/ES-Hoxb4-ChIP-Seq(GSE34014)/Homer	TGATTRATGGCY	1	-0.275	1	48	0.1622	805.1	0.1766
EBF(EBF)/proBcell-EBF-ChIP-Seq(GSE21978)/Homer	DGTCCCYRGGGA	1	-0.275	1	32	0.1081	548.9	0.1204
PR(NR)/T47D-PR-ChIP-Seq(GSE31130)/Homer	VAGRACAKNCTGTBC	1	-0.272	1	276	0.9324	4287.7	0.9407
RUNX-AML(Runt)/CD4+-PolII-ChIP-Seq(Barski et al.)/Homer	GCTGTGGTTW	1	-0.26	1	142	0.4797	2280.2	0.5002
Pax8(Paired,Homeobox)/Thyroid-Pax8-ChIP-Seq(GSE26938)/Homer	GTCATGCHTGRCTGS	1	-0.255	1	56	0.1892	938.9	0.206
n-Myc(bHLH)/mES-nMyc-ChIP-Seq(GSE11431)/Homer	VRCCACGTGG	1	-0.249	1	122	0.4122	1975	0.4333
Jun-AP1(bZIP)/K562-cJun-ChIP-Seq(GSE31477)/Homer	GATGASTCATCN	1	-0.248	1	43	0.1453	732.6	0.1607
Pdx1(Homeobox)/Islet-Pdx1-ChIP-Seq(SRA008281)/Homer	YCATYAATCA	1	-0.245	1	195	0.6588	3094.7	0.6789
Nr5a2(NR)/mES-Nr5a2-ChIP-Seq(GSE19019)/Homer	BTCAAGGTCA	1	-0.227	1	114	0.3851	1859.7	0.408
E2F7(E2F)/Hela-E2F7-ChIP-Seq(GSE32673)/Homer	VDTTTCCCGCCA	1	-0.225	1	10	0.0338	192.7	0.0423
ISRE(IRF)/ThioMac-LPS-Expression(GSE23622)/Homer	AGTTTCASTTTC	1	-0.212	1	12	0.0405	229.8	0.0504
GRHL2(CP2)/HBE-GRHL2-ChIP-Seq(GSE46194)/Homer	AAACYKGTTWDACMRGTTTB	1	-0.209	1	90	0.3041	1491.2	0.3272
HIF2a(bHLH)/785_O-HIF2a-ChIP-Seq(GSE34871)/Homer	GCACGTACCC	1	-0.209	1	48	0.1622	824	0.1808
CTCF-SatelliteElement(Zf?)/CD4+-CTCF-ChIP-Seq(Barski et al.)/Homer	TGCAGTTCCMVNWRTGGCCA	1	-0.202	1	3	0.0101	68.5	0.015
GFY(?)/Promoter/Homer	ACTACAATTCCC	1	-0.199	1	11	0.0372	215	0.0472
THRa(NR)/C17.2-THRa-ChIP-Seq(GSE38347)/Homer	GGTCANYTGAGGWCA	1	-0.196	1	71	0.2399	1196	0.2624
Ap4(bHLH)/AML-Tfap4-ChIP-Seq(GSE45738)/Homer	NAHCAGCTGD	1	-0.192	1	176	0.5946	2826.3	0.6201
Oct2(POU,Homeobox)/Bcell-Oct2-ChIP-Seq(GSE21512)/Homer	ATATGCAAAT	1	-0.189	1	86	0.2905	1436.1	0.3151
RUNX1(Runt)/Jurkat-RUNX1-ChIP-Seq(GSE29180)/Homer	AAACCACARM	1	-0.186	1	195	0.6588	3116.6	0.6837
bZIP:IRF(bZIP,IRF)/Th17-BatF-ChIP-Seq(GSE39756)/Homer	NAGTTTCABTHTGACTNW	1	-0.177	1	124	0.4189	2035.8	0.4466
Znf263(Zf)/K562-Znf263-ChIP-Seq(GSE31477)/Homer	CVGTSCTCCC	1	-0.173	1	227	0.7669	3599.8	0.7897
FOXA1:AR(Forkhead,NR)/LNCAP-AR-ChIP-Seq(GSE27824)/Homer	AGTAAACAAAAAAGAACAND	1	-0.172	1	36	0.1216	641.9	0.1408
Chop(bZIP)/MEF-Chop-ChIP-Seq(GSE35681)/Homer	ATTGCATCAT	1	-0.165	1	46	0.1554	808	0.1773
Cdx2(Homeobox)/mES-Cdx2-ChIP-Seq(GSE14586)/Homer	GYMATAAAAH	1	-0.152	1	189	0.6385	3041	0.6672
ARE(NR)/LNCAP-AR-ChIP-Seq(GSE27824)/Homer	RGRACASNSTGTYCYB	1	-0.151	1	70	0.2365	1199.4	0.2631
Tcf3(HMG)/mES-Tcf3-ChIP-Seq(GSE11724)/Homer	ASWTCAAAGG	1	-0.151	1	72	0.2432	1231.9	0.2703
FOXP1(Forkhead)/H9-FOXP1-ChIP-Seq(GSE31006)/Homer	NYYTGTTTACHN	1	-0.151	1	113	0.3818	1877.8	0.412
NF1:FOXA1(CTF,Forkhead)/LNCAP-FOXA1-ChIP-Seq(GSE27824)/Homer	WNTGTTTRYTTTGGCA	1	-0.143	1	11	0.0372	226.5	0.0497
HIF-1a(bHLH)/MCF7-HIF1a-ChIP-Seq(GSE28352)/Homer	TACGTGCV	1	-0.143	1	33	0.1115	602.9	0.1323
Tbox:Smad(T-box,MAD)/ESCd5-Smad2_3-ChIP-Seq(GSE29422)/Homer	AGGTGHCAGACA	1	-0.137	1	38	0.1284	688	0.1509
Foxa2(Forkhead)/Liver-Foxa2-ChIP-Seq(GSE25694)/Homer	CYTGTTTACWYW	1	-0.132	1	180	0.6081	2916.7	0.6399
FOXA1(Forkhead)/MCF7-FOXA1-ChIP-Seq(GSE26831)/Homer	WAAGTAAACA	1	-0.125	1	225	0.7601	3590.7	0.7877
ZFX(Zf)/mES-Zfx-ChIP-Seq(GSE11431)/Homer	AGGCCTRG	1	-0.122	1	163	0.5507	2664.8	0.5846
Smad2(MAD)/ES-SMAD2-ChIP-Seq(GSE29422)/Homer	CTGTCTGG	1	-0.116	1	222	0.75	3551.9	0.7792
E2A(bHLH),near_PU.1/Bcell-PU.1-ChIP-Seq(GSE21512)/Homer	NVCACCTGBN	1	-0.107	1	199	0.6723	3216	0.7055
MafA(bZIP)/Islet-MafA-ChIP-Seq(GSE30298)/Homer	TGCTGACTCA	1	-0.104	1	143	0.4831	2370.2	0.52
Foxo1(Forkhead)/RAW-Foxo1-ChIP-Seq(Fan et al.)/Homer	CTGTTTAC	1	-0.103	1	255	0.8615	4033.2	0.8848
Lhx3(Homeobox)/Neuron-Lhx3-ChIP-Seq(GSE31456)/Homer	ADBTAATTAR	1	-0.096	1	252	0.8514	3994.5	0.8763
TEAD(TEA)/Fibroblast-PU.1-ChIP-Seq(Unpublished)/Homer	YCWGGAATGY	1	-0.0928	1	140	0.473	2332.3	0.5117
RARg(NR)/ES-RARg-ChIP-Seq(GSE30538)/Homer	AGGTCAAGGTCA	1	-0.0919	1	25	0.0845	489.9	0.1075
RORgt(NR)/EL4-RORgt.Flag-ChIP-Seq(GSE56019)/Homer	AAYTAGGTCA	1	-0.0905	1	27	0.0912	524.2	0.115
MafK(bZIP)/C2C12-MafK-ChIP-Seq(GSE36030)/Homer	GCTGASTCAGCA	1	-0.0902	1	48	0.1622	876.5	0.1923
c-Myc(bHLH)/mES-cMyc-ChIP-Seq(GSE11431)/Homer	VVCCACGTGG	1	-0.0889	1	98	0.3311	1681.6	0.3689
Hnf1(Homeobox)/Liver-Foxa2-Chip-Seq(GSE25694)/Homer	GGTTAAWCATTAA	1	-0.0875	1	43	0.1453	795.4	0.1745
IRF1(IRF)/PBMC-IRF1-ChIP-Seq(GSE43036)/Homer	GAAAGTGAAAGT	1	-0.077	1	33	0.1115	634.3	0.1392
Oct4(POU,Homeobox)/mES-Oct4-ChIP-Seq(GSE11431)/Homer	ATTTGCATAW	1	-0.0736	1	124	0.4189	2101.5	0.461
CTCF(Zf)/CD4+-CTCF-ChIP-Seq(Barski et al.)/Homer	AYAGTGCCMYCTRGTGGCCA	1	-0.0709	1	26	0.0878	518.6	0.1138
NFAT:AP1(RHD,bZIP)/Jurkat-NFATC1-ChIP-Seq(Jolma et al.)/Homer	SARTGGAAAAWRTGAGTCAB	1	-0.0694	1	36	0.1216	690.2	0.1514
p53(p53)/mES-cMyc-ChIP-Seq(GSE11431)/Homer	ACATGCCCGGGCAT	1	-0.0683	1	1	0.0034	42.7	0.0094
RBPJ:Ebox(?,bHLH)/Panc1-Rbpj1-ChIP-Seq(GSE47459)/Homer	GGGRAARRGRMCAGMTG	1	-0.0652	1	58	0.1959	1059.4	0.2324
Tbx20(T-box)/Heart-Tbx20-ChIP-Seq(GSE29636)/Homer	GGTGYTGACAGS	1	-0.061	1	40	0.1351	764.7	0.1678
MyoD(bHLH)/Myotube-MyoD-ChIP-Seq(GSE21614)/Homer	RRCAGCTGYTSY	1	-0.0586	1	106	0.3581	1835.3	0.4026
PAX3:FKHR-fusion(Paired,Homeobox)/Rh4-PAX3:FKHR-ChIP-Seq(GSE19063)/Homer	ACCRTGACTAATTNN	1	-0.0523	1	59	0.1993	1088.8	0.2389
Mouse_Recombination_Hotspot(Zf)/Testis-DMC1-ChIP-Seq(GSE24438)/Homer	ACTYKNATTCGTGNTACTTC	1	-0.0517	1	15	0.0507	335.3	0.0736
GATA3(Zf),DR4/iTreg-Gata3-ChIP-Seq(GSE20898)/Homer	AGATGKDGAGATAAG	1	-0.0429	1	21	0.0709	451.4	0.099
Nanog(Homeobox)/mES-Nanog-ChIP-Seq(GSE11724)/Homer	RGCCATTAAC	1	-0.0307	1	293	0.9899	4541.2	0.9963
ZNF711(Zf)/SHSY5Y-ZNF711-ChIP-Seq(GSE20673)/Homer	AGGCCTAG	1	-0.0243	1	202	0.6824	3345.9	0.734
Brachyury(T-box)/Mesoendoderm-Brachyury-ChIP-exo(GSE54963)/Homer	ANTTMRCASBNNNGTGYKAAN	1	-0.0241	1	57	0.1926	1096.5	0.2406
Ascl1(bHLH)/NeuralTubes-Ascl1-ChIP-Seq(GSE55840)/Homer	NNVVCAGCTGBN	1	-0.0238	1	195	0.6588	3244.5	0.7118
E2A(bHLH)/proBcell-E2A-ChIP-Seq(GSE21978)/Homer	DNRCAGCTGY	1	-0.0224	1	181	0.6115	3041.3	0.6672
Ptf1a(bHLH)/Panc1-Ptf1a-ChIP-Seq(GSE47459)/Homer	ACAGCTGTTN	1	-0.0219	1	261	0.8818	4172.5	0.9154
MyoG(bHLH)/C2C12-MyoG-ChIP-Seq(GSE36024)/Homer	AACAGCTG	1	-0.0215	1	141	0.4764	2440.7	0.5355
MafF(bZIP)/HepG2-MafF-ChIP-Seq(GSE31477)/Homer	HWWGTCAGCAWWTTT	1	-0.0199	1	64	0.2162	1222.2	0.2681
PRDM9(Zf)/Testis-DMC1-ChIP-Seq(GSE35498)/Homer	ADGGYAGYAGCATCT	1	-0.0194	1	70	0.2365	1322.8	0.2902
Atoh1(bHLH)/Cerebellum-Atoh1-ChIP-Seq(GSE22111)/Homer	VNRVCAGCTGGY	1	-0.0189	1	160	0.5405	2736.9	0.6004
HOXA2(Homeobox)/mES-Hoxa2-ChIP-Seq(Donaldson et al.)/Homer	GYCATCMATCAT	1	-0.0106	1	18	0.0608	445.8	0.0978
NFkB-p50,p52(RHD)/Monocyte-p50-ChIP-Chip(Schreiber et al.)/Homer	GGGGGAATCCCC	1	-0.00838	1	9	0.0304	272.1	0.0597
GLI3(Zf)/Limb-GLI3-ChIP-Chip(GSE11077)/Homer	CGTGGGTGGTCC	1	-0.00816	1	12	0.0405	335.5	0.0736
Myf5(bHLH)/GM-Myf5-ChIP-Seq(GSE24852)/Homer	BAACAGCTGT	1	-0.00696	1	97	0.3277	1811.1	0.3973
Nkx2.5(Homeobox)/HL1-Nkx2.5.biotin-ChIP-Seq(GSE21529)/Homer	RRSCACTYAA	1	-0.00456	1	264	0.8919	4251	0.9326
NFkB-p65(RHD)/GM12787-p65-ChIP-Seq(GSE19485)/Homer	WGGGGATTTCCC	1	-0.00359	1	89	0.3007	1713	0.3758
Max(bHLH)/K562-Max-ChIP-Seq(GSE31477)/Homer	RCCACGTGGYYN	1	-0.00298	1	125	0.4223	2292.3	0.5029
NFkB-p65-Rel(RHD)/ThioMac-LPS-Expression(GSE23622)/Homer	GGAAATTCCC	1	-0.00276	1	5	0.0169	207.6	0.0455
HOXD13(Homeobox)/Chicken-Hoxd13-ChIP-Seq(GSE38910)/Homer	NCYAATAAAA	1	-0.00173	1	223	0.7534	3745.8	0.8218
YY1(Zf)/Promoter/Homer	CAAGATGGCGGC	1	-0.000861	1	10	0.0338	350.2	0.0768
Nkx2.1(Homeobox)/LungAC-Nkx2.1-ChIP-Seq(GSE43252)/Homer	RSCACTYRAG	1	-0.000622	1	276	0.9324	4418	0.9692
