# Supplementary material for: The life history of retrocopies illuminates the evolution of new mammalian genes
Source: HighWire-hosted journal article supplement (doi:10.1101/gr.198473.115), 2016-01-04
Supplement: Supplemental_Tables.zip [file Supplemental_Table_S6.xlsx]

## Sheet: Retrocopy families (10 species)
# Supplemental Table S6: orthologous retrocopy families shared by at least two species from the main dataset
human	chimpanzee	gorilla	orangutan	macaque	mouse	rat	opossum	platypus	chicken
hsa_retrop33328	NA	ggo_retrop03492	ppy_retrop16833	mmuiretrop29349	NA	NA	NA	NA	NA
hsa_retrom24517	ptr_retrom10960	ggo_retrom01749	NA	mmu_retrom20626	NA	NA	NA	NA	NA
hsa_retrop25936	ptr_retrop01820	ggo_retrop00039	ppy_retrop03135	NA	NA	NA	NA	NA	NA
hsa_retrom08497	ptr_retrom05397	ggoiretrom17077	ppy_retrom10262	mmuiretrom13524	NA	NA	NA	NA	NA
hsa_retrom22292	ptriretrom14106	ggoiretrom10404	ppyiretrop16824	NA	NA	NA	NA	NA	NA
hsa_retrom06414	ptr_retrom05023	ggoiretrom17214	NA	NA	NA	NA	NA	NA	NA
hsa_retrop33323	ptr_retrop08891	ggo_retrop03489	ppy_retrop16825	mmu_retrop31548	NA	NA	NA	NA	NA
hsa_retrop33324	ptr_retrop08893	ggo_retrop03490	ppy_retrop16828	mmu_retrop31551	NA	NA	NA	NA	NA
hsa_retrop33327	ptriretrop33026	ggo_retrop03491	ppy_retrop16831	mmu_retrop31556	NA	NA	NA	NA	NA
hsa_retrom26008	ptriretrom05829	ggoiretrom02734	ppyiretrom08146	mmu_retrop09988	NA	NA	NA	NA	NA
hsa_retrom22055	ptr_retrom04066	ggo_retrom01355	NA	mmu_retrom17179	NA	NA	NA	NA	NA
hsa_retrom08250	ptriretrom18110	ggoiretrom18869	ppy_retrom10073	mmu_retrom14172	NA	NA	NA	NA	NA
hsa_retrom08252	ptr_retrom05256	ggoiretrom17044	NA	mmu_retrom14173	NA	NA	NA	NA	NA
hsa_retrop26151	ptr_retrop01850	NA	ppy_retrop02747	mmu_retrop10390	NA	NA	NA	NA	NA
hsairetrop26327	ptriretrop37316	ggo_retrop04077	ppy_retrom16425	mmu_retrop34086	NA	NA	NA	NA	NA
hsa_retrom04584	ptriretrom18906	ggoiretrom21079	ppy_retrop10678	mmu_retrop17063	NA	NA	NA	NA	NA
hsa_retrom01325	ptr_retrom10155	ggo_retrom04565	ppy_retrop19050	mmu_retrom36939	NA	NA	NA	NA	NA
hsa_retrop37417	ptr_retrop08662	ggo_retrop03909	NA	mmu_retrop28037	NA	NA	NA	NA	NA
hsa_retrop37413	ptr_retrop08660	ggo_retrop03907	ppy_retrop16492	mmu_retrop28002	NA	NA	NA	NA	NA
hsa_retrop37410	ptr_retrop08659	ggo_retrop03906	ppy_retrop16489	NA	NA	NA	NA	NA	NA
hsa_retrop06816	ptr_retrop04589	ggo_retrop02122	ppy_retrom09435	mmu_retrom13141	NA	NA	NA	NA	NA
hsairetrop38653	ptriretrop22584	ggoiretrop11113	ppyiretrop24000	mmuiretrom11116	NA	NA	NA	NA	NA
hsa_retrom01210	ptr_retrom10129	ggo_retrom04548	ppy_retrop19095	NA	NA	NA	NA	NA	NA
hsa_retrop11602	ptr_retrop04165	ggo_retrop01227	ppy_retrop09321	NA	NA	NA	NA	NA	NA
hsa_retrop33257	ptr_retrop08874	ggo_retrop03480	ppyiretrop35795	mmu_retrop31485	NA	NA	NA	NA	NA
hsa_retrom17099	ptriretrom08133	ggo_retrom00547	ppy_retrom07033	NA	NA	NA	NA	NA	NA
hsa_retrop39837	ptriretrop23904	ggo_retrop02448	ppy_retrop12893	mmu_retrop22602	NA	NA	NA	NA	NA
hsa_retrom18716	ptr_retrom02498	NA	ppy_retrom03791	mmu_retrom03476	NA	NA	NA	NA	NA
hsa_retrom28162	ptr_retrom09522	ggoiretrom31640	ppy_retrop17929	mmu_retrop34433	NA	NA	NA	NA	NA
hsa_retrom08787	NA	ggo_retrom01933	ppy_retrom11823	mmuiretrom16946	NA	NA	NA	NA	NA
hsa_retrom40747	NA	ggo_retrom02891	ppy_retrom12756	mmu_retrom22451	NA	NA	NA	NA	NA
hsa_retrom40138	ptr_retrom06432	ggo_retrom01656	ppy_retrom11422	mmu_retrom11964	NA	NA	NA	NA	NA
hsa_retrom07901	ptriretrom17711	ggo_retrom02392	ppy_retrom09939	mmu_retrom13953	NA	NA	NA	NA	NA
hsa_retrom24460	ptriretrom41087	ggoiretrom13159	ppy_retrop10851	NA	NA	NA	NA	NA	NA
hsa_retrom24463	ptr_retrom10950	ggo_retrom01742	NA	NA	NA	NA	NA	NA	NA
hsa_retrom07902	ptr_retrom05170	ggo_retrom02393	ppy_retrom09942	NA	NA	NA	NA	NA	NA
hsa_retrop37776	ptriretrop26967	ggoiretrop23691	ppyiretrom30082	mmu_retrom35209	NA	NA	NA	NA	NA
hsa_retrom25020	ptr_retrom11080	ggoiretrom13266	ppyiretrom21933	mmuiretrom10704	NA	NA	NA	NA	NA
hsa_retrom08076	ptr_retrom05209	ggo_retrom02426	ppy_retrom10012	mmu_retrom14097	NA	NA	NA	NA	NA
hsa_retrop18716	ptr_retrop02357	ggo_retrop00278	ppy_retrop04056	mmu_retrop04890	NA	NA	NA	NA	NA
hsa_retrop11144	ptr_retrop04066	ggo_retrop01171	ppy_retrop09164	mmu_retrop09242	NA	NA	NA	NA	NA
hsairetrom11641	ptr_retrom03743	ggo_retrom00945	ppyiretrom14451	NA	mus_retrom50572	rno_retrom03657	mdo_retrom27996	NA	NA
hsa_retrom04636	ptr_retrom05545	ggo_retrom02793	ppy_retrop10652	NA	NA	NA	NA	NA	NA
hsa_retrop10948	ptr_retrop05779	ggo_retrop02018	NA	NA	NA	NA	NA	NA	NA
hsa_retrop03731	ptr_retrop10831	ggo_retrop04735	NA	mmu_retrom38209	NA	NA	NA	NA	NA
hsa_retrom25747	ptr_retrom02067	ggo_retrop00403	ppy_retrom04966	NA	NA	NA	NA	NA	NA
hsa_retrom14367	ptriretrom11248	ggo_retrom00789	ppy_retrom07238	mmu_retrom27125	NA	NA	NA	NA	NA
hsa_retrop09919	ptr_retrom05922	ggo_retrop01869	NA	NA	NA	NA	NA	NA	NA
hsairetrom09331	ptriretrop20067	ggoiretrom14779	ppy_retrom12072	mmu_retrom16385	NA	NA	NA	NA	NA
hsa_retrom25314	ptriretrom42189	ggoiretrom13332	NA	NA	NA	NA	NA	NA	NA
hsa_retrom31443	ptr_retrop08736	ggo_retrop01087	ppyiretrom33914	mmuiretrom27581	NA	NA	NA	NA	NA
hsa_retrop42646	ptr_retrop06736	ggo_retrop02731	ppy_retrop13325	mmu_retrop23574	NA	NA	NA	NA	NA
hsa_retrom22052	ptr_retrom04065	ggo_retrom01354	ppy_retrop09112	mmu_retrom17177	NA	NA	NA	NA	NA
hsa_retrom18665	ptriretrom06727	NA	ppy_retrom03754	mmu_retrom03444	NA	NA	NA	NA	NA
hsa_retrom18666	ptr_retrom02494	ggoiretrom01728	ppyiretrom06392	mmuiretrom03008	NA	NA	NA	NA	NA
hsa_retrom38368	ptr_retrom06842	ggo_retrom02678	ppy_retrom12537	mmu_retrom21369	NA	NA	NA	NA	NA
hsa_retrop41318	ptr_retrop05985	ggo_retrop01515	NA	mmu_retrop13765	NA	NA	NA	NA	NA
hsa_retrom41085	ptr_retrom06984	ggo_retrom02934	NA	mmu_retrom22820	NA	NA	NA	NA	NA
hsa_retrom14383	ptr_retrom03439	ggo_retrom00792	ppy_retrom07242	mmuiretrom25760	NA	NA	NA	NA	NA
hsa_retrom38366	ptr_retrom06841	ggo_retrom02677	ppy_retrom12536	NA	NA	NA	NA	NA	NA
hsa_retrom18802	ptr_retrom02519	ggo_retrom00250	NA	mmu_retrom03554	NA	NA	NA	NA	NA
hsa_retrop32518	NA	ggo_retrom01225	ppy_retrop16511	mmu_retrop30458	NA	NA	NA	NA	NA
hsa_retrop17831	ptriretrop06328	ggoiretrop01589	ppyiretrop06521	NA	NA	NA	NA	NA	NA
hsa_retrom18808	ptr_retrom02523	ggo_retrom00251	ppy_retrom03831	mmu_retrom03564	NA	NA	NA	NA	NA
hsa_retrom32683	ptriretrom28918	ggo_retrom03649	NA	NA	NA	NA	NA	NA	NA
hsa_retrop12951	ptriretrop13256	ggo_retrop00961	ppy_retrop07952	mmuiretrop26872	NA	NA	NA	NA	NA
hsa_retrom11141	ptriretrom12311	ggo_retrom00911	ppy_retrom07595	mmu_retrom28464	NA	NA	NA	NA	NA
hsa_retrom15494	ptr_retrom03286	ggo_retrom00677	ppy_retrom06812	NA	NA	NA	NA	NA	NA
hsa_retrom40695	NA	ggo_retrom02885	ppy_retrom12745	mmu_retrom22436	NA	NA	NA	NA	NA
hsa_retrop00398	ptr_retrop10332	ggo_retrop04460	ppy_retrom18582	mmu_retrop38043	NA	NA	NA	NA	NA
hsa_retrom04126	ptr_retrom05470	ggo_retrom02740	NA	NA	NA	NA	NA	NA	NA
hsairetrom24670	ptriretrom35270	ggo_retrom03954	NA	NA	NA	NA	NA	NA	NA
hsa_retrop10305	ptr_retrom05832	ggo_retrop01918	ppy_retrop12435	NA	NA	NA	NA	NA	NA
hsa_retrop09873	ptr_retrom05934	NA	ppyiretrop25299	mmu_retrop17994	NA	NA	NA	NA	NA
hsa_retrop03605	NA	ggoiretrop34931	ppy_retrom17816	mmu_retrom38363	NA	NA	NA	NA	NA
hsa_retrop08651	ptr_retrop05003	NA	ppy_retrop10172	mmuiretrop15486	NA	NA	NA	NA	NA
hsa_retrom15165	ptriretrom10187	ggoiretrom03976	NA	NA	NA	NA	NA	NA	NA
hsa_retrom34727	ptr_retrom08444	ggo_retrom03808	ppy_retrom15128	NA	NA	NA	NA	NA	NA
hsa_retrom34720	ptr_retrom08435	ggo_retrom03805	ppy_retrom15123	NA	NA	NA	NA	NA	NA
hsa_retrom14708	ptr_retrom03545	ggo_retrom00862	NA	NA	mus_retrom91453	rno_retrom07089	NA	NA	NA
hsa_retrop43370	ptr_retrop06880	ggo_retrop02809	ppy_retrop13642	mmu_retrop24176	NA	NA	NA	NA	NA
hsa_retrom35232	ptriretrom30936	ggoiretrom28574	ppyiretrom32976	mmuiretrop23434	NA	NA	NA	NA	NA
hsa_retrom05997	NA	ggoiretrom17930	ppy_retrop09756	mmu_retrop15000	NA	NA	NA	NA	NA
hsa_retrom34546	ptr_retrom08402	ggoiretrom29065	NA	mmu_retrom25927	NA	NA	NA	NA	NA
hsa_retrom34544	ptr_retrom08400	ggo_retrom03779	ppy_retrom15079	NA	NA	NA	NA	NA	NA
hsa_retrop34970	ptr_retrop07691	ggo_retrop03647	ppy_retrop15239	mmu_retrop25643	NA	NA	NA	NA	NA
hsa_retrop34973	ptr_retrop07692	ggo_retrop03648	ppy_retrop15241	mmuiretrop23851	NA	NA	NA	NA	NA
hsa_retrom14949	ptriretrom09935	ggoiretrom04060	ppy_retrom06636	mmu_retrom06978	NA	NA	NA	NA	NA
hsa_retrom11399	ptriretrom12716	ggoiretrom06733	NA	NA	NA	NA	NA	NA	NA
hsa_retrop01063	ptr_retrop10391	ggoiretrop35649	NA	mmuiretrop38494	NA	NA	NA	NA	NA
hsa_retrom11391	ptriretrom12698	ggoiretrom07861	ppyiretrom14524	mmuiretrom25244	NA	NA	NA	NA	NA
hsa_retrop11375	ptr_retrop04103	ggoiretrop09242	ppy_retrop09251	NA	NA	NA	NA	NA	NA
hsa_retrop04082	ptriretrop41669	ggo_retrop04809	ppy_retrom17619	NA	NA	NA	NA	NA	NA
hsa_retrop39651	ptr_retrop06501	ggo_retrop02409	ppy_retrop12803	NA	NA	NA	NA	NA	NA
hsa_retrom00743	ptr_retrom09998	ggo_retrom04484	ppy_retrop19281	mmu_retrom36395	NA	NA	NA	NA	NA
hsa_retrom29895	ptr_retrop09625	ggo_retrom04276	ppy_retrom16162	mmu_retrop32955	mus_retrom96889	rno_retrop02285	NA	NA	NA
hsa_retrop09679	NA	ggo_retrop01825	ppy_retrop12179	mmu_retrop17836	NA	NA	NA	NA	NA
hsa_retrop10234	ptriretrom20407	ggo_retrop01910	ppy_retrop12412	mmu_retrop18274	NA	NA	NA	NA	NA
hsa_retrop24918	ptriretrop43160	NA	ppyiretrop22518	mmuiretrop11959	NA	NA	NA	NA	NA
hsa_retrop15879	ptr_retrop02685	ggo_retrop01033	NA	NA	NA	NA	NA	NA	NA
hsa_retrom38549	ptr_retrom06892	ggoiretrom20685	ppy_retrom12613	NA	NA	NA	NA	NA	NA
hsa_retrop37954	ptr_retrop07305	ggo_retrop03080	NA	mmu_retrom35009	NA	NA	NA	NA	NA
hsa_retrop31854	ptriretrop35154	ggoiretrop34652	ppy_retrop17502	mmu_retrop33344	NA	NA	NA	NA	NA
hsa_retrop36950	ptr_retrop08545	ggo_retrop03830	ppy_retrop16252	mmu_retrop27417	NA	NA	NA	NA	NA
hsa_retrop01468	ptr_retrop10441	ggo_retrop04518	ppy_retrom18303	mmu_retrop38550	NA	NA	NA	NA	NA
hsa_retrom15543	ptr_retrom03297	ggo_retrom00689	NA	NA	NA	NA	NA	NA	NA
hsa_retrom40964	ptr_retrom06963	ggo_retrom02923	ppy_retrom12848	mmu_retrom22740	NA	NA	NA	NA	NA
hsa_retrom27082	ptriretrom04910	ggoiretrom00715	ppy_retrom02823	NA	NA	NA	NA	NA	NA
hsa_retrop43351	ptriretrop25362	ggo_retrop02807	ppy_retrop13636	NA	NA	NA	NA	NA	NA
hsa_retrop03512	ptriretrop40817	ggoiretrop38321	NA	mmuiretrop41179	NA	NA	NA	NA	NA
hsa_retrop01466	ptriretrop39309	ggoiretrop35683	ppyiretrom41556	mmu_retrop38547	NA	NA	NA	NA	NA
hsa_retrom15549	ptr_retrom03302	ggo_retrom00691	ppy_retrom06847	mmu_retrom07439	NA	NA	NA	NA	NA
hsa_retrom35192	ptr_retrom08553	ggo_retrom03875	NA	mmu_retrop27693	NA	NA	NA	NA	NA
hsa_retrom30592	ptriretrom35008	ggo_retrom04380	ppy_retrom16357	NA	NA	NA	NA	NA	NA
hsa_retrom30308	ptr_retrom09310	ggo_retrom04343	NA	mmu_retrom32330	NA	NA	NA	NA	NA
hsa_retrom41607	ptriretrom25663	ggoiretrom22574	ppy_retrom13036	mmu_retrom23175	NA	NA	NA	NA	NA
hsa_retrop13117	ptr_retrop03778	ggo_retrop00984	NA	mmu_retrop30258	NA	NA	NA	NA	NA
hsa_retrom39694	ptriretrom22400	ggoiretrom11810	NA	NA	NA	NA	NA	NA	NA
hsa_retrop15890	ptr_retrop02690	ggo_retrop01038	ppy_retrop06078	mmu_retrop07178	NA	NA	NA	NA	NA
hsa_retrop28265	ptr_retrop09887	ggo_retrop03950	ppy_retrom16929	mmu_retrop35838	NA	NA	NA	NA	NA
hsa_retrop43171	ptr_retrop06838	ggo_retrop02783	ppyiretrop28627	mmu_retrop23994	NA	NA	NA	NA	NA
hsa_retrom16939	ptr_retrom02766	ggo_retrom00498	ppy_retrom06967	mmu_retrom05529	NA	NA	NA	NA	NA
hsa_retrop39893	ptr_retrop06579	ggo_retrop02460	ppy_retrop12937	mmu_retrop22696	NA	NA	NA	NA	NA
hsa_retrom16935	ptr_retrom02764	NA	ppy_retrom06966	mmu_retrom05523	NA	NA	NA	NA	NA
hsa_retrom40980	ptr_retrom06965	ggo_retrom02925	ppy_retrom12856	mmu_retrom22764	NA	NA	NA	NA	NA
hsa_retrop34579	ptriretrop33817	NA	ppy_retrop17153	mmu_retrop32123	NA	NA	NA	NA	NA
hsa_retrom03452	ptr_retrom10685	ggo_retrom04805	NA	mmu_retrop39460	NA	NA	NA	NA	NA
hsa_retrom16448	ptriretrop08631	ggo_retrop03361	ppy_retrom01954	NA	NA	NA	NA	NA	NA
hsa_retrop04172	ptr_retrop10955	NA	ppy_retrom17581	mmu_retrom38874	NA	NA	NA	NA	NA
hsa_retrop09450	ptr_retrop05476	ggoiretrop15804	ppyiretrop24796	NA	NA	NA	NA	NA	NA
hsa_retrom38108	ptr_retrom06786	ggo_retrom02608	ppy_retrom12460	mmu_retrom21222	NA	NA	NA	NA	NA
hsa_retrom16442	ptr_retrop02725	ggo_retrop03363	NA	NA	NA	NA	NA	NA	NA
hsa_retrop09455	ptriretrop19829	ggo_retrop01800	ppy_retrop12095	NA	NA	NA	NA	NA	NA
hsairetrom30074	ptriretrom33269	ggoiretrom27268	ppyiretrom34991	mmuiretrom28464	NA	NA	NA	NA	NA
hsa_retrom11715	ptr_retrom03820	ggo_retrom01011	ppyiretrom15009	NA	NA	NA	NA	NA	NA
hsa_retrom11714	ptr_retrom03819	ggo_retrom01010	ppy_retrom07884	mmu_retrom29217	NA	NA	NA	NA	NA
hsa_retrom00324	ptr_retrom09943	ggo_retrom04459	ppy_retrop19429	mmu_retrom36174	NA	NA	NA	NA	NA
hsa_retrom37988	ptr_retrom06744	ggo_retrom02587	ppy_retrom12408	mmu_retrom21159	NA	NA	NA	NA	NA
hsa_retrom29259	ptriretrom37270	ggo_retrom04162	ppy_retrom17266	mmu_retrop34917	NA	NA	NA	NA	NA
hsa_retrop19956	ptr_retrop02425	ggo_retrop00352	ppyiretrop07724	NA	NA	NA	NA	NA	NA
hsa_retrop24009	ptriretrop14867	ggoiretrop10160	ppyiretrop15925	mmuiretrop20722	mus_retrop70539	rno_retrom00350	mdo_retrop03702	NA	gga_retrop30433
hsa_retrom30355	ptr_retrom09327	NA	ppy_retrom16273	mmu_retrom32358	NA	NA	NA	NA	NA
hsa_retrom42054	ptr_retrom07149	ggo_retrom03052	ppy_retrom13200	mmu_retrom23588	NA	NA	NA	NA	NA
hsa_retrop29021	ptr_retrop09930	ggo_retrop03986	NA	NA	NA	NA	NA	NA	NA
hsa_retrom42052	ptr_retrom07148	ggo_retrom03051	ppy_retrom13199	mmu_retrom23581	NA	NA	NA	NA	NA
hsairetrom38388	ptriretrom25172	ggo_retrom02920	NA	NA	NA	NA	NA	NA	NA
hsa_retrop24221	ptr_retrop11385	ggo_retrop01624	ppy_retrom10766	NA	NA	NA	NA	NA	NA
hsa_retrom29599	ptr_retrom09132	ggoiretrom32651	NA	NA	NA	NA	NA	NA	NA
hsa_retrop06729	ptr_retrop04568	ggoiretrop16705	ppy_retrom09471	NA	NA	NA	NA	NA	NA
hsairetrom11387	ptriretrom12361	ggo_retrom00917	NA	mmu_retrom28493	NA	NA	NA	NA	NA
hsa_retrom36766	ptr_retrom07650	ggoiretrom24087	ppy_retrom13961	mmu_retrom35696	NA	NA	NA	NA	NA
hsa_retrom35412	ptr_retrom08608	ggo_retrom03913	ppy_retrom15401	NA	NA	NA	NA	NA	NA
hsa_retrom35417	ptr_retrom08613	ggo_retrom03915	ppy_retrom15406	NA	NA	NA	NA	NA	NA
hsa_retrom16629	ptriretrom09438	ggo_retrop03326	ppy_retrom06481	mmu_retrom06668	NA	NA	NA	NA	NA
hsa_retrop24719	ptr_retrop11492	NA	ppy_retrop11014	mmu_retrop12377	NA	NA	NA	NA	NA
hsairetrop31601	ptr_retrop07694	ggo_retrop03649	ppy_retrop15245	NA	NA	NA	NA	NA	NA
hsa_retrom00928	ptr_retrom10053	ggoiretrom35747	ppy_retrop19198	mmu_retrom36565	NA	NA	NA	NA	NA
hsa_retrop09297	ptr_retrop05452	ggoiretrop14347	ppyiretrop24631	mmu_retrop17575	NA	NA	NA	NA	NA
hsa_retrop38126	ptr_retrop07349	ggo_retrop03114	ppy_retrom13601	NA	NA	NA	NA	NA	NA
hsa_retrom35092	ptriretrom30812	ggo_retrom03867	ppy_retrom15302	mmuiretrop25788	NA	NA	NA	NA	NA
hsairetrop09078	ptr_retrom05940	ggoiretrop14846	ppyiretrop25243	mmuiretrop19779	NA	NA	NA	NA	NA
hsa_retrop08895	ptr_retrop05062	ggo_retrop02317	ppy_retrop10265	mmu_retrop16083	NA	NA	NA	NA	NA
hsa_retrom37817	ptr_retrom06703	ggo_retrom02558	ppy_retrom12350	mmu_retrom20979	NA	NA	NA	NA	NA
hsa_retrop12553	ptr_retrop03649	NA	ppy_retrop07817	mmu_retrop29681	NA	NA	NA	NA	NA
hsa_retrop29287	ptr_retrop10007	ggo_retrop04029	NA	mmu_retrop33889	NA	NA	NA	NA	NA
hsa_retrop13539	ptriretrop11093	ggo_retrop00722	ppyiretrop13143	mmu_retrop28216	NA	NA	NA	NA	NA
hsa_retrop25267	ptriretrop05460	ggo_retrop00400	ppyiretrop08317	NA	NA	NA	NA	NA	NA
hsa_retrop37173	ptriretrop31438	ggo_retrop03868	ppy_retrop16370	NA	NA	NA	NA	NA	NA
hsa_retrom37819	ptr_retrom06705	ggoiretrom18931	NA	NA	NA	NA	NA	NA	NA
hsa_retrom36810	NA	ggo_retrom03346	ppy_retrom13984	mmu_retrom35754	NA	NA	NA	NA	NA
hsa_retrom31240	ptr_retrop08767	ggo_retrop01111	NA	mmu_retrom30286	NA	NA	NA	NA	NA
hsa_retrop42662	NA	ggo_retrop02735	ppy_retrop13349	mmu_retrop23591	NA	NA	NA	NA	NA
hsa_retrop05773	ptriretrop19250	ggoiretrop20266	ppy_retrop10753	NA	NA	NA	NA	NA	NA
hsa_retrop05775	ptriretrop19258	ggo_retrop02676	NA	mmu_retrop17287	NA	NA	NA	NA	NA
hsa_retrop32129	ptr_retrop09773	ggo_retrop04375	ppy_retrop17623	mmu_retrop33700	NA	NA	NA	NA	NA
hsa_retrop02002	ptr_retrom10222	ggo_retrop04601	NA	mmu_retrop39035	NA	NA	NA	NA	NA
hsa_retrop40672	ptriretrop21747	ggo_retrop01440	ppyiretrom23014	mmu_retrom11625	musiretrop30459	NA	NA	NA	NA
hsa_retrop21756	ptriretrop14165	ggo_retrop01293	ppy_retrom08711	mmu_retrop19347	NA	NA	NA	NA	NA
hsa_retrom07594	ptr_retrom05087	ggo_retrom02342	NA	NA	NA	NA	NA	NA	NA
hsa_retrom26972	ptriretrom04745	ggo_retrom00105	ppy_retrom02785	mmuiretrom08480	NA	NA	NA	NA	NA
hsa_retrom16710	ptriretrom09626	ggo_retrop03304	ppy_retrom06520	mmu_retrom06760	NA	NA	NA	NA	NA
hsa_retrop41743	ptr_retrop06103	ggo_retrop01567	ppy_retrop11711	NA	NA	NA	NA	NA	NA
hsa_retrom03676	ptriretrom40964	ggoiretrom35192	ppyiretrop40549	NA	NA	NA	NA	NA	NA
hsa_retrom04807	ptr_retrom05578	ggo_retrom02820	ppy_retrop10567	NA	NA	NA	NA	NA	NA
hsa_retrom29102	ptriretrom37117	ggoiretrom31806	ppy_retrom17207	mmu_retrop35078	NA	NA	NA	NA	NA
hsa_retrop38012	ptr_retrop07311	ggo_retrop03094	ppy_retrom13621	mmu_retrom34955	NA	NA	NA	NA	NA
hsa_retrom37967	ptr_retrom06737	ggo_retrom02580	NA	NA	NA	NA	NA	NA	NA
hsa_retrom28502	ptr_retrom09626	ggoiretrom30407	ppy_retrop17754	NA	NA	NA	NA	NA	NA
hsa_retrom09793	ptriretrom21610	ggoiretrom14879	ppyiretrom25531	mmuiretrom17256	NA	NA	NA	NA	NA
hsa_retrop32951	NA	ggoiretrom08991	ppy_retrop16692	mmu_retrop31129	NA	NA	NA	NA	NA
hsairetrom22661	ptriretrom05446	ggo_retrom00369	NA	mmu_retrom08961	NA	NA	NA	NA	NA
hsa_retrom27236	ptriretrom05057	ggo_retrom00138	ppyiretrom05268	mmu_retrom09618	NA	NA	NA	NA	NA
hsa_retrop21638	ptr_retrop03863	ggo_retrop01277	ppy_retrom08761	NA	NA	NA	NA	NA	NA
hsa_retrop21639	ptr_retrop03864	ggoiretrop09991	ppyiretrom16558	mmuiretrop20544	NA	NA	NA	NA	NA
hsa_retrom36385	ptr_retrom07587	ggo_retrom03292	ppy_retrom13507	NA	NA	NA	NA	NA	NA
hsa_retrop38272	ptr_retrop07376	ggoiretrop23728	ppy_retrom13857	NA	NA	NA	NA	NA	NA
hsa_retrop13159	ptriretrop13541	ggoiretrop06772	ppy_retrop08027	mmu_retrop30343	NA	NA	NA	NA	NA
hsa_retrop03882	ptr_retrop10868	ggo_retrop04773	ppyiretrom39584	mmu_retrom37968	NA	NA	NA	NA	NA
hsa_retrop31646	ptr_retrop09680	ggo_retrop04300	ppyiretrop37738	mmu_retrop33203	NA	NA	NA	NA	NA
hsa_retrop31363	ptr_retrom09196	ggo_retrop04245	ppy_retrom16096	mmu_retrom31940	NA	NA	NA	NA	NA
hsa_retrop40587	ptriretrop21644	ggoiretrop12044	ppyiretrom23104	NA	NA	NA	NA	NA	NA
hsa_retrop13151	ptriretrop13521	ggoiretrop06768	NA	mmuiretrop26931	NA	NA	NA	NA	NA
hsa_retrop37772	ptriretrop26962	ggo_retrop03025	ppy_retrom13762	mmu_retrom35239	NA	NA	NA	NA	NA
hsa_retrom38040	ptr_retrom06772	ggo_retrom02599	ppy_retrom12447	NA	NA	NA	NA	NA	NA
hsa_retrom38978	ptr_retrom06105	ggo_retrom01554	ppy_retrop11490	mmu_retrop13686	mus_retrom40716	rno_retrom07517	NA	NA	NA
hsa_retrop30044	ptr_retrop10165	ggo_retrop04119	NA	mmu_retrom34158	NA	NA	NA	NA	NA
hsairetrom26215	ptriretrom36972	ggo_retrom04133	ppy_retrom17168	mmuiretrop33876	NA	NA	NA	NA	NA
hsa_retrop40077	ptr_retrop06619	ggoiretrop18947	ppy_retrop13039	mmu_retrop22824	NA	NA	NA	NA	NA
hsa_retrom07683	ptr_retrom05111	ggo_retrom02350	ppy_retrop09413	mmu_retrop14009	NA	NA	NA	NA	NA
hsa_retrom36147	ptr_retrom07508	ggo_retrom03257	NA	mmu_retrop36404	NA	NA	NA	NA	NA
hsa_retrop40074	ptr_retrop06617	ggo_retrop02480	ppy_retrop13030	mmu_retrop22807	NA	NA	NA	NA	NA
hsa_retrop12791	ptr_retrop03719	ggoiretrop06677	ppyiretrop14985	mmu_retrop29939	NA	NA	NA	NA	NA
hsa_retrop12790	ptr_retrop03717	ggo_retrop00937	ppyiretrop14977	mmuiretrop28290	NA	NA	NA	NA	NA
hsairetrom23232	ptriretrom05981	ggo_retrom00447	NA	NA	NA	NA	NA	NA	NA
hsa_retrom42584	ptriretrom26485	ggo_retrom03107	NA	NA	NA	NA	NA	NA	NA
hsa_retrop10646	ptriretrop21039	ggoiretrop14036	ppy_retrop12561	NA	NA	NA	NA	NA	NA
hsa_retrom02890	ptriretrom39872	NA	ppy_retrop18677	mmuiretrom35889	NA	NA	NA	NA	NA
hsa_retrom09248	ptr_retrop05583	ggo_retrom01990	ppy_retrom11995	mmu_retrom16244	NA	NA	NA	NA	NA
hsa_retrop24189	ptr_retrop11377	ggo_retrop01621	ppy_retrom10783	mmu_retrop22121	NA	NA	NA	NA	NA
hsa_retrop12177	ptr_retrop03578	ggoiretrop07025	ppy_retrop07630	NA	NA	NA	NA	NA	NA
hsa_retrop33087	ptr_retrop08831	ggoiretrop26974	ppy_retrop16740	NA	NA	NA	NA	NA	NA
hsa_retrom26577	ptr_retrom01905	ggo_retrom00069	ppy_retrom02986	mmu_retrop35940	NA	NA	NA	NA	NA
hsa_retrop33082	ptr_retrop08830	ggoiretrop26973	ppyiretrop35604	NA	NA	NA	NA	NA	NA
hsa_retrom37639	ptr_retrom06660	ggo_retrom02526	ppy_retrom12279	mmu_retrom20772	NA	NA	NA	NA	NA
hsairetrop23312	ptriretrop05953	ggo_retrop00464	ppyiretrop08929	mmuiretrom09219	NA	NA	NA	NA	NA
hsa_retrom04850	NA	ggo_retrom02832	ppy_retrom10586	mmu_retrom15248	NA	NA	NA	NA	NA
hsa_retrop12774	ptr_retrop03714	ggo_retrop00936	ppy_retrop07899	mmu_retrop29932	NA	NA	NA	NA	NA
hsairetrop41259	ptriretrop26436	ggoiretrop23457	NA	NA	NA	NA	NA	NA	NA
hsa_retrom17157	ptr_retrom02814	ggo_retrom00564	ppy_retrom07055	mmu_retrom05833	NA	NA	NA	NA	NA
hsa_retrom22598	ptr_retrom04185	ggo_retrom01454	NA	NA	NA	NA	NA	NA	NA
hsa_retrop08878	ptriretrop17800	ggo_retrop02313	NA	mmu_retrop16058	NA	NA	NA	NA	NA
hsa_retrom22593	ptr_retrom04182	ggo_retrom01450	NA	NA	NA	NA	NA	NA	NA
hsa_retrop20837	ptriretrop07550	ggo_retrop00376	NA	NA	NA	NA	NA	NA	NA
hsa_retrom08867	ptr_retrom05799	ggo_retrom01944	ppy_retrom11869	mmu_retrom15894	NA	NA	NA	NA	NA
hsairetrop12280	ptriretrop12940	ggoiretrop07112	NA	NA	NA	NA	NA	NA	NA
hsa_retrop08870	ptr_retrop05057	ggo_retrop02312	ppy_retrop10253	mmu_retrop16057	musiretrom15167	rnoiretrom18953	NA	NA	NA
hsa_retrom07778	ptr_retrom05137	ggo_retrom02369	ppy_retrom09879	mmu_retrom13835	NA	NA	NA	NA	NA
hsa_retrom25906	ptriretrom05644	ggo_retrom00405	NA	mmu_retrop10129	NA	NA	NA	NA	NA
hsa_retrom06317	ptr_retrom04960	ggo_retrom02233	ppy_retrop09635	NA	NA	NA	NA	NA	NA
hsa_retrop16656	ptr_retrop02871	ggo_retrom03414	ppy_retrop06356	mmu_retrop08229	NA	NA	NA	NA	NA
hsa_retrop17000	ptr_retrom02720	ggo_retrop00502	ppy_retrom06893	mmu_retrom05352	NA	NA	NA	NA	NA
hsa_retrom07773	ptr_retrom05135	ggo_retrom02368	ppy_retrom09871	mmu_retrom13819	NA	NA	NA	NA	NA
hsairetrom29340	ptriretrom32463	ggoiretrom25993	ppy_retrom15721	mmu_retrom30753	NA	NA	NA	NA	NA
hsa_retrop40108	ptr_retrop06626	ggo_retrop02487	NA	mmu_retrop22842	NA	NA	NA	NA	NA
hsa_retrop31420	ptr_retrom09184	ggo_retrop04254	ppy_retrom16077	mmu_retrom31900	NA	NA	NA	NA	NA
hsa_retrom01334	NA	ggoiretrom37117	ppy_retrop19044	mmu_retrom36985	NA	NA	NA	NA	NA
hsa_retrom31634	ptriretrop32079	ggoiretrom26309	NA	mmuiretrom27611	NA	NA	NA	NA	NA
hsa_retrom40790	ptr_retrom06925	ggo_retrom02901	ppy_retrom12775	mmu_retrom22488	NA	NA	NA	NA	NA
hsa_retrop24740	ptriretrop42921	ggoiretrop12963	ppyiretrop22322	mmu_retrop12430	NA	NA	NA	NA	NA
hsairetrom28347	ptriretrom31437	ggo_retrop01153	ppy_retrom15445	mmu_retrom29854	NA	NA	NA	NA	NA
hsa_retrom25098	ptr_retrom11100	ggoiretrom13644	ppy_retrom10926	NA	NA	NA	NA	NA	NA
hsairetrom07538	ptriretrom17595	ggo_retrom02376	NA	mmuiretrom14074	NA	NA	NA	NA	NA
hsa_retrop13832	ptriretrop11437	ggoiretrop05216	ppy_retrop07269	mmu_retrop28470	NA	NA	NA	NA	NA
hsa_retrom42725	ptr_retrom07286	ggoiretrom23326	ppy_retrom13425	NA	NA	NA	NA	NA	NA
hsa_retrom14576	ptriretrom11605	ggo_retrom00830	ppy_retrom07338	mmu_retrom27419	NA	NA	NA	NA	NA
hsa_retrop13476	ptriretrop11004	ggoiretrop05158	ppy_retrop07128	NA	NA	NA	NA	NA	NA
hsairetrop32898	ptriretrop30855	ggoiretrop28490	ppyiretrop33836	mmu_retrop27191	mus_retrom66317	NA	NA	NA	NA
hsa_retrom35964	ptr_retrom07433	ggo_retrom03203	NA	NA	NA	NA	NA	NA	NA
hsa_retrop44356	NA	ggo_retrop02961	ppy_retrop14024	mmu_retrop25241	NA	NA	NA	NA	NA
hsa_retrop41735	ptr_retrop06097	ggo_retrop01563	NA	mmu_retrom11074	NA	NA	NA	NA	NA
hsa_retrom01206	ptr_retrom10127	ggo_retrom04544	ppy_retrop19099	mmu_retrom36787	NA	NA	NA	NA	NA
hsa_retrop02806	NA	ggo_retrop04619	ppy_retrop18922	mmu_retrop39081	NA	NA	NA	NA	NA
hsa_retrop01850	ptr_retrop10527	ggo_retrop04576	ppy_retrom18144	NA	NA	NA	NA	NA	NA
hsa_retrop05828	ptr_retrop05407	ggoiretrop20665	NA	mmu_retrop17361	NA	NA	NA	NA	NA
hsa_retrop05826	ptr_retrop05406	ggo_retrop02686	ppy_retrop10782	mmu_retrop17358	NA	NA	NA	NA	NA
hsa_retrop32119	ptr_retrop09772	ggo_retrop04374	ppyiretrop38275	mmu_retrop33699	NA	NA	NA	NA	NA
hsa_retrom07919	ptr_retrom05173	ggoiretrom16101	ppyiretrom19450	NA	NA	NA	NA	NA	NA
hsa_retrom24476	ptriretrom41139	ggo_retrom01746	ppy_retrop10841	mmu_retrom20616	NA	NA	NA	NA	NA
hsa_retrom24474	ptr_retrom10952	ggo_retrom01745	ppy_retrop10842	mmu_retrom20607	NA	NA	NA	NA	NA
hsa_retrom01027	ptr_retrom10090	ggo_retrom04528	ppyiretrop42831	mmu_retrom36702	NA	NA	NA	NA	NA
hsa_retrom07912	NA	ggo_retrom02394	ppy_retrom09944	mmu_retrom13970	NA	NA	NA	NA	NA
hsa_retrop32114	ptriretrop35595	ggo_retrop04373	ppy_retrop17620	NA	NA	NA	NA	NA	NA
hsa_retrom24471	ptriretrom41121	ggo_retrom01743	ppy_retrop10844	mmu_retrom20589	mus_retrop114001	rno_retrop02069	NA	NA	NA
hsa_retrop40929	ptr_retrop05944	ggoiretrop11445	NA	NA	NA	NA	NA	NA	NA
hsairetrop27118	ptr_retrop10235	ggo_retrop04169	ppy_retrop18225	NA	NA	NA	NA	NA	NA
hsa_retrop16666	ptr_retrop02876	ggo_retrom03409	ppy_retrop06372	NA	NA	NA	NA	NA	NA
hsa_retrop16660	ptriretrop09639	ggoiretrom25852	NA	NA	NA	NA	NA	NA	NA
hsa_retrop03726	ptr_retrop10829	ggo_retrop04733	ppy_retrom17762	mmu_retrom38219	NA	NA	NA	NA	NA
hsa_retrom35049	ptr_retrom08526	ggo_retrom03857	ppy_retrom15259	NA	NA	NA	NA	NA	NA
hsa_retrom22334	ptriretrom14161	ggo_retrom01413	ppy_retrop08994	mmu_retrom17597	NA	NA	NA	NA	NA
hsa_retrop12739	ptr_retrop03704	ggo_retrop00930	ppy_retrop07879	NA	NA	NA	NA	NA	NA
hsa_retrop40926	ptr_retrop05943	ggo_retrop01477	ppy_retrom11139	NA	NA	NA	NA	NA	NA
hsa_retrom14373	ptriretrom11264	ggo_retrom00791	ppy_retrom07241	mmu_retrom27141	NA	NA	NA	NA	NA
hsa_retrom14370	ptriretrom11254	ggoiretrom05690	ppy_retrom07240	NA	NA	NA	NA	NA	NA
hsa_retrop16464	ptriretrom08541	ggoiretrom27069	ppyiretrop03274	mmuiretrop07157	NA	NA	NA	NA	NA
hsa_retrop36048	ptr_retrop08217	ggo_retrop03704	ppy_retrop15860	NA	NA	NA	NA	NA	NA
hsa_retrom42520	ptriretrom26435	ggoiretrom22734	NA	mmu_retrom23969	NA	NA	NA	NA	NA
hsa_retrop16468	ptriretrom08533	ggoiretrom26175	ppyiretrop03286	mmuiretrop06534	NA	NA	NA	NA	NA
hsa_retrop42639	ptriretrop24817	ggoiretrop23012	ppy_retrop13322	mmu_retrop23568	NA	NA	NA	NA	NA
hsa_retrom41777	ptr_retrom07106	ggo_retrom03020	ppyiretrom28415	mmu_retrom23333	NA	NA	NA	NA	NA
hsa_retrom41770	ptr_retrom07105	ggo_retrom03019	ppy_retrom13094	mmu_retrom23332	NA	NA	NA	NA	NA
hsa_retrop34844	NA	ggo_retrop03626	ppy_retrop15191	NA	mus_retrop51942	rno_retrom01172	NA	NA	NA
hsa_retrom24875	ptriretrom41538	ggoiretrom13225	NA	NA	NA	NA	NA	NA	NA
hsairetrop15098	ptr_retrop03066	ggoiretrop04658	ppy_retrop06651	mmu_retrop08779	NA	NA	NA	NA	NA
hsa_retrop44132	ptr_retrop07092	ggo_retrop02920	ppyiretrop29698	NA	NA	NA	NA	NA	NA
hsa_retrom34424	ptr_retrom08366	ggo_retrom03757	ppy_retrom15026	NA	NA	NA	NA	NA	NA
hsa_retrom10386	ptr_retrom04408	NA	ppy_retrom09004	mmu_retrom08014	NA	NA	NA	NA	NA
hsa_retrop44133	ptr_retrop07093	ggo_retrop02921	ppy_retrop13921	mmu_retrop24906	NA	NA	NA	NA	NA
hsa_retrom14396	ptr_retrom03445	ggoiretrom05166	ppy_retrom07252	mmu_retrom27171	NA	NA	NA	NA	NA
hsa_retrom41812	ptriretrom25877	ggo_retrom03024	ppy_retrom13116	NA	NA	NA	NA	NA	NA
hsa_retrom14390	ptr_retrom03443	ggo_retrom00795	ppy_retrom07246	mmu_retrom27159	NA	NA	NA	NA	NA
hsa_retrop03311	ptriretrop40657	ggoiretrop34905	ppyiretrom40325	NA	NA	NA	NA	NA	NA
hsa_retrop43584	ptr_retrop06916	ggo_retrop02838	NA	mmu_retrop24371	NA	NA	NA	NA	NA
hsa_retrop27895	ptr_retrop09818	ggo_retrop03915	ppy_retrom16602	NA	NA	NA	NA	NA	NA
hsa_retrop00415	ptriretrop38723	ggoiretrop38131	ppy_retrom18581	mmu_retrop38047	NA	NA	NA	NA	NA
hsa_retrop36545	ptriretrop30544	ggoiretrop28748	ppy_retrop16082	mmu_retrop26882	NA	NA	NA	NA	NA
hsa_retrom24894	ptriretrom41565	ggo_retrom01793	ppy_retrom10860	mmuiretrom09891	NA	NA	NA	NA	NA
hsa_retrop37891	ptriretrop27172	ggo_retrop03050	ppyiretrom29874	NA	NA	NA	NA	NA	NA
hsa_retrop10844	ptr_retrop05753	ggo_retrop02001	ppy_retrop12634	NA	NA	NA	NA	NA	NA
hsa_retrop10333	ptriretrom20327	ggo_retrop01922	ppy_retrop12446	NA	NA	NA	NA	NA	NA
hsa_retrom40355	ptr_retrom06464	NA	ppyiretrom23592	mmuiretrop12825	NA	NA	NA	NA	NA
hsa_retrom40350	ptr_retrom06463	ggo_retrom01679	ppy_retrom11482	mmu_retrop13068	NA	NA	NA	NA	NA
hsa_retrop31246	ptr_retrop09600	ggo_retrop04219	ppy_retrop17317	mmu_retrop32861	NA	NA	NA	NA	NA
hsa_retrom04154	ptr_retrom05483	ggo_retrom02746	NA	NA	NA	NA	NA	NA	NA
hsa_retrop32958	ptr_retrom08805	ggo_retrom01129	ppy_retrop16695	mmu_retrop31166	NA	NA	NA	NA	NA
hsa_retrop03610	ptr_retrop10808	ggo_retrop04715	ppy_retrom17811	NA	NA	NA	NA	NA	NA
hsa_retrom41111	ptr_retrom06992	ggo_retrom02936	ppy_retrom12896	mmu_retrom22846	NA	NA	NA	NA	NA
hsairetrom32244	ptriretrom30970	ggoiretrom27869	ppyiretrom32998	NA	NA	NA	NA	NA	NA
hsa_retrom14169	ptriretrom10975	NA	ppy_retrom07180	mmu_retrom26953	NA	NA	NA	NA	NA
hsa_retrom34732	ptriretrom30271	ggo_retrom03810	ppyiretrom32352	NA	NA	NA	NA	NA	NA
hsa_retrop29796	ptr_retrop10125	ggo_retrom04076	ppy_retrom16401	mmu_retrom16651	NA	NA	NA	NA	NA
hsa_retrom14718	ptr_retrom03551	ggo_retrom00863	ppy_retrom07419	mmu_retrom27693	NA	NA	NA	NA	NA
hsa_retrop43760	ptr_retrop06961	ggo_retrop02866	NA	mmu_retrop24553	NA	NA	NA	NA	NA
hsa_retrom25442	ptriretrom42321	ggo_retrom01870	NA	mmu_retrom10611	NA	NA	NA	NA	NA
hsa_retrom34551	ptr_retrom08405	ggo_retrom03783	NA	NA	NA	NA	NA	NA	NA
hsa_retrom34552	ptr_retrom08406	ggo_retrom03784	ppy_retrom15081	NA	NA	NA	NA	NA	NA
hsa_retrop44036	ptr_retrop07050	NA	ppy_retrop13857	mmu_retrop24782	NA	NA	NA	NA	NA
hsa_retrop39312	ptriretrop23203	ggoiretrop19153	NA	NA	NA	NA	NA	NA	NA
hsa_retrom05049	NA	ggoiretrom21841	ppyiretrom21340	mmuiretrom15651	NA	NA	NA	NA	NA
hsairetrop24499	ptriretrop04910	ggoiretrop01003	ppyiretrop05555	mmuiretrop10780	mus_retrop70634	rnoiretrom01748	NA	NA	NA
hsa_retrop31308	ptr_retrom09213	ggo_retrop04230	ppy_retrop17335	NA	NA	NA	NA	NA	NA
hsa_retrop15316	ptr_retrop03107	ggoiretrop04692	ppyiretrop12099	mmu_retrop08948	NA	NA	NA	NA	NA
hsa_retrom34966	ptriretrom30593	ggo_retrom03843	ppyiretrom32630	mmu_retrop27990	NA	NA	NA	NA	NA
hsa_retrop24721	ptriretrop42865	ggoiretrop12953	ppyiretrop22274	mmuiretrop11569	NA	NA	NA	NA	NA
hsa_retrop15311	ptr_retrop03105	ggo_retrop00661	NA	mmu_retrom07369	NA	NA	NA	NA	NA
hsairetrom10088	ptriretrom15106	ggoiretrom09727	ppyiretrom16875	NA	NA	NA	NA	NA	NA
hsa_retrop16844	ptr_retrom02751	NA	ppyiretrom12219	mmuiretrom04663	NA	NA	NA	NA	NA
hsa_retrop36942	ptriretrop31095	ggo_retrop03829	ppy_retrop16251	mmu_retrop27414	NA	NA	NA	NA	NA
hsa_retrop40142	ptr_retrop06638	ggo_retrop02497	ppy_retrop13067	mmu_retrop22865	NA	NA	NA	NA	NA
hsa_retrop08266	ptr_retrop04892	ggo_retrop02237	ppy_retrom09237	NA	NA	NA	NA	NA	NA
hsairetrop23121	ptr_retrop02047	ggoiretrop02788	ppy_retrop05161	mmu_retrom08737	NA	NA	NA	NA	NA
hsa_retrop03504	ptr_retrop10775	ggo_retrop04694	ppy_retrom17855	NA	NA	NA	NA	NA	NA
hsa_retrom35953	ptr_retrom07432	ggo_retrom03201	ppy_retrop14313	mmu_retrop36528	NA	NA	NA	NA	NA
hsa_retrom35950	ptr_retrom07431	ggo_retrom03200	ppy_retrop14314	mmu_retrop36532	NA	NA	NA	NA	NA
hsa_retrop39796	ptr_retrop06552	ggo_retrop02444	NA	NA	NA	NA	NA	NA	NA
hsa_retrop43341	ptr_retrop06873	ggo_retrop02806	ppy_retrop13629	mmu_retrop24146	NA	NA	NA	NA	NA
hsa_retrom30100	ptriretrom34377	ggo_retrom04306	ppy_retrom16224	NA	NA	NA	NA	NA	NA
hsa_retrop15889	ptr_retrop02689	ggoiretrop08114	ppy_retrop06076	mmu_retrop07173	NA	NA	NA	NA	NA
hsa_retrom11639	ptr_retrom03805	ggo_retrom00994	ppy_retrom07831	mmu_retrom29125	NA	NA	NA	NA	NA
hsa_retrop39469	ptriretrop02698	ggoiretrop18883	ppy_retrom12259	mmu_retrom20759	NA	NA	NA	NA	NA
hsa_retrop01613	ptr_retrop10469	ggo_retrop04541	NA	mmu_retrop38713	NA	NA	NA	NA	NA
hsa_retrop01615	ptr_retrop10472	ggo_retrop04543	NA	mmu_retrop38719	NA	NA	NA	NA	NA
hsa_retrom34802	ptriretrom30348	ggo_retrom03821	ppy_retrom15144	NA	NA	NA	NA	NA	NA
hsa_retrom16945	ptriretrom07930	NA	ppyiretrom12290	mmuiretrom04906	NA	NA	NA	NA	NA
hsa_retrom34803	NA	ggoiretrom28478	ppyiretrom32424	mmuiretrom23154	NA	NA	NA	NA	NA
hsa_retrop11414	ptr_retrop04108	ggo_retrop01207	ppyiretrop17626	NA	NA	NA	NA	NA	NA
hsa_retrop34562	ptriretrop33779	ggoiretrop26762	ppy_retrop17147	NA	NA	NA	NA	NA	NA
hsa_retrop24587	ptr_retrop11470	ggoiretrop12913	ppy_retrop10915	mmu_retrop12115	NA	NA	NA	NA	NA
hsa_retrop25521	ptr_retrop02025	ggoiretrop03211	ppyiretrop08477	mmu_retrop10343	NA	NA	NA	NA	NA
hsa_retrom03449	ptr_retrom10684	ggoiretrom35143	ppyiretrop40801	mmuiretrop38783	NA	NA	NA	NA	NA
hsa_retrop05357	ptr_retrop05299	ggoiretrop20218	ppyiretrom20771	NA	NA	NA	NA	NA	NA
hsa_retrop18121	ptriretrop06465	ggoiretrop01612	NA	NA	NA	NA	NA	NA	NA
hsa_retrom10659	ptr_retrom04488	ggo_retrom01344	ppy_retrom09163	mmu_retrom08445	NA	NA	NA	NA	NA
hsa_retrop37260	ptr_retrop08618	ggoiretrop30558	ppy_retrop16401	mmuiretrom23564	NA	NA	NA	NA	NA
hsa_retrom16252	ptr_retrop02779	ggoiretrop26926	ppyiretrom10395	mmu_retrom06298	NA	NA	NA	NA	NA
hsa_retrom38948	ptr_retrom06099	ggo_retrom01548	ppy_retrop11496	NA	NA	NA	NA	NA	NA
hsa_retrom15443	ptriretrom10384	ggoiretrom04294	NA	mmu_retrom07266	NA	NA	NA	NA	NA
hsa_retrop28928	ptr_retrop09913	ggoiretrop31418	NA	NA	NA	NA	NA	NA	NA
hsa_retrom30640	NA	ggo_retrom04387	ppy_retrom16375	mmu_retrom32584	NA	NA	NA	NA	NA
hsa_retrom11522	ptr_retrom03787	ggo_retrom00976	NA	mmu_retrom29058	NA	NA	NA	NA	NA
hsa_retrop41389	ptr_retrop06006	ggo_retrop01529	ppy_retrop11587	mmu_retrop13847	NA	NA	NA	NA	NA
hsa_retrop04252	ptr_retrop10968	ggo_retrop04827	NA	mmu_retrom38803	NA	NA	NA	NA	NA
hsa_retrom25437	ptriretrom42313	ggoiretrom14180	ppyiretrom22444	mmuiretrom09967	NA	NA	NA	NA	NA
hsa_retrom34809	ptriretrom30361	ggo_retrom03823	ppy_retrom15150	mmu_retrom26153	NA	NA	NA	NA	NA
hsa_retrop15271	ptr_retrop03091	ggo_retrop00652	ppy_retrop06684	mmu_retrop08883	NA	NA	NA	NA	NA
hsa_retrom34950	ptriretrom30545	ggoiretrom28122	ppy_retrom15200	mmuiretrom23857	NA	NA	NA	NA	NA
hsa_retrom34951	ptr_retrom08499	ggoiretrom28123	ppy_retrom15201	NA	NA	NA	NA	NA	NA
hsa_retrop18310	ptr_retrop02317	ggo_retrop00247	NA	mmu_retrop04491	NA	NA	NA	NA	NA
hsa_retrom41181	ptr_retrom07001	ggo_retrom02952	ppyiretrom27862	NA	NA	NA	NA	NA	NA
hsa_retrom34958	ptr_retrom08501	ggo_retrom03842	ppy_retrom15204	NA	NA	NA	NA	NA	NA
hsa_retrom29023	ptr_retrom09803	ggo_retrom04138	ppy_retrom17187	mmu_retrop35160	NA	NA	NA	NA	NA
hsa_retrop20345	ptr_retrop02457	NA	ppyiretrop07926	mmuiretrop04984	NA	NA	NA	NA	NA
hsa_retrop36653	NA	ggo_retrop03783	ppy_retrop16150	mmu_retrop27059	NA	NA	NA	NA	NA
hsa_retrop11527	ptriretrop15456	ggoiretrop09483	ppy_retrop09306	mmuiretrop09154	NA	NA	NA	NA	NA
hsa_retrop15275	ptriretrop10624	ggo_retrop00653	ppy_retrop06687	mmuiretrop07908	NA	NA	NA	NA	NA
hsa_retrom28204	ptr_retrom09528	ggo_retrom04015	ppy_retrop17904	NA	NA	NA	NA	NA	NA
hsa_retrom31521	ptriretrop32191	ggoiretrop08162	ppy_retrom15655	NA	NA	NA	NA	NA	NA
hsa_retrop33176	NA	ggo_retrop03468	ppy_retrop16760	mmu_retrop31406	NA	NA	NA	NA	NA
hsa_retrop37145	ptr_retrop08600	ggo_retrop03864	ppy_retrop16354	mmu_retrom26542	NA	NA	NA	NA	NA
hsa_retrop08792	ptriretrop17689	ggo_retrop02298	NA	NA	NA	NA	NA	NA	NA
hsa_retrom37822	ptr_retrom06706	ggo_retrom02560	ppy_retrom12352	mmu_retrom20997	NA	NA	NA	NA	NA
hsa_retrom29755	ptr_retrop09653	ggoiretrom33111	ppyiretrop37367	NA	NA	NA	NA	NA	NA
hsa_retrom29756	ptr_retrop09652	ggo_retrom04240	NA	NA	NA	NA	NA	NA	NA
hsa_retrop37142	ptr_retrop08599	ggo_retrop03863	ppy_retrop16353	mmu_retrom26548	NA	NA	NA	NA	NA
hsa_retrop31879	ptr_retrop09711	ggo_retrop04319	NA	mmu_retrop33359	NA	NA	NA	NA	NA
hsa_retrop25277	ptr_retrop02003	NA	ppyiretrop08330	mmu_retrop10229	NA	NA	NA	NA	NA
hsa_retrom36800	ptriretrom28419	NA	ppy_retrom13978	mmu_retrom35744	NA	NA	NA	NA	NA
hsa_retrop31250	ptr_retrop09602	ggo_retrop04220	ppyiretrop37225	mmu_retrop32863	NA	NA	NA	NA	NA
hsairetrom00928	ptriretrom38346	ggo_retrom04521	ppyiretrop42891	mmuiretrom37407	NA	NA	NA	NA	NA
hsa_retrom29965	ptr_retrom09220	ggo_retrom04287	ppy_retrom16179	mmu_retrom32048	NA	NA	NA	NA	NA
hsa_retrop40668	ptr_retrop05838	ggoiretrop11390	ppy_retrom11279	mmu_retrom11628	NA	NA	NA	NA	NA
hsa_retrop13786	ptr_retrop03246	ggo_retrop00765	ppy_retrop07256	mmu_retrop28449	NA	NA	NA	NA	NA
hsa_retrom06188	ptriretrom16696	ggoiretrom16255	ppy_retrop09689	NA	NA	NA	NA	NA	NA
hsa_retrom03068	ptr_retrom10582	ggo_retrom04729	ppy_retrop18608	NA	NA	NA	NA	NA	NA
hsa_retrop34771	ptr_retrop09512	ggoiretrop26824	ppy_retrop17216	NA	NA	NA	NA	NA	NA
hsa_retrop31254	ptr_retrop09603	ggo_retrop04221	ppy_retrop17323	mmu_retrop32891	NA	NA	NA	NA	NA
hsa_retrom16093	ptriretrop09282	ggo_retrom01115	NA	mmu_retrom06154	NA	NA	NA	NA	NA
hsa_retrom16095	ptr_retrop02828	ggo_retrom01117	ppy_retrom06238	NA	NA	NA	NA	NA	NA
hsa_retrop08652	ptr_retrop05005	ggoiretrop17009	ppy_retrop10173	NA	NA	NA	NA	NA	NA
hsairetrop09714	ptriretrom20253	ggoiretrop15456	NA	mmu_retrop18407	NA	NA	NA	NA	NA
hsa_retrom04816	ptr_retrom05584	ggo_retrom02824	ppy_retrop10560	mmu_retrop16772	NA	NA	NA	NA	NA
hsa_retrom31563	ptr_retrop08718	ggo_retrop01075	ppy_retrom15664	mmu_retrom30567	NA	NA	NA	NA	NA
hsa_retrop11631	ptr_retrop04175	ggoiretrop08918	ppy_retrop09341	mmu_retrop09679	NA	NA	NA	NA	NA
hsairetrop00609	ptriretrop38760	NA	ppyiretrom42100	mmu_retrop38078	NA	NA	NA	NA	NA
hsa_retrop04965	ptr_retrop05255	ggo_retrop02564	NA	NA	NA	NA	NA	NA	NA
hsa_retrom06094	ptriretrom16603	ggo_retrom02201	ppy_retrop09724	mmu_retrop14933	NA	NA	NA	NA	NA
hsa_retrop04960	ptriretrop18450	ggo_retrop02563	ppy_retrop10522	NA	NA	NA	NA	NA	NA
hsa_retrop37153	ptriretrop31410	ggoiretrop29278	ppyiretrop34404	mmuiretrom22622	NA	NA	NA	NA	NA
hsa_retrop03294	ptr_retrop10749	ggo_retrop04672	ppyiretrom40350	mmu_retrop39299	NA	NA	NA	NA	NA
hsa_retrop15465	ptr_retrop03112	ggoiretrop04446	ppy_retrop06798	NA	NA	NA	NA	NA	NA
hsa_retrop15463	ptr_retrop03110	NA	ppy_retrop06796	mmu_retrop09016	NA	NA	NA	NA	NA
hsa_retrop03290	ptr_retrop10748	ggo_retrop04671	ppyiretrom40354	mmu_retrop39294	NA	NA	NA	NA	NA
hsa_retrop21604	ptr_retrop03855	ggo_retrop01273	ppy_retrom08789	mmu_retrop19119	mus_retrom49633	rno_retrom03541	NA	NA	gga_retrop28989
hsa_retrom39341	ptr_retrom06307	ggo_retrom01587	ppyiretrop23221	mmu_retrop13380	mus_retrop94508	NA	NA	NA	NA
hsa_retrop42354	NA	ggoiretrop11600	ppy_retrop11981	mmu_retrom10797	NA	NA	NA	NA	NA
hsa_retrop29615	ptr_retrop10085	ggo_retrop04066	ppy_retrom16443	NA	NA	NA	NA	NA	NA
hsa_retrop37091	ptr_retrop08586	ggo_retrop03856	ppy_retrop16337	mmu_retrop27804	NA	NA	NA	NA	NA
hsa_retrop35579	ptriretrop29803	NA	ppy_retrop15581	mmu_retrop26099	NA	NA	NA	NA	NA
hsa_retrop37094	ptr_retrop08588	ggo_retrop03857	ppyiretrop34339	mmu_retrom26582	NA	NA	NA	NA	NA
hsa_retrop13491	ptriretrop11030	ggoiretrop06045	NA	mmu_retrop28160	NA	NA	NA	NA	NA
hsa_retrom35601	ptriretrom26798	NA	ppy_retrop14462	mmu_retrop36791	NA	NA	NA	NA	NA
hsa_retrom09304	ptr_retrop05577	ggo_retrom01998	NA	mmu_retrom16259	NA	NA	NA	NA	NA
hsa_retrop34687	ptr_retrop09500	ggo_retrop03605	ppy_retrop17199	NA	NA	NA	NA	NA	NA
hsa_retrom03395	ptr_retrom10678	ggo_retrom04796	ppy_retrop18479	NA	NA	NA	NA	NA	NA
hsa_retrom16165	ptr_retrop02809	ggoiretrop26541	ppy_retrom06270	mmu_retrom06202	NA	NA	NA	NA	NA
hsa_retrom42246	ptr_retrom07200	ggoiretrom22684	ppyiretrom28856	mmu_retrom23798	NA	NA	NA	NA	NA
hsa_retrop25075	ptr_retrop11566	ggo_retrop01743	NA	mmu_retrop12702	NA	NA	NA	NA	NA
hsa_retrom22105	ptriretrom13811	ggoiretrom10348	NA	NA	NA	NA	NA	NA	NA
hsa_retrop38679	ptriretrop28137	ggo_retrop03182	NA	mmuiretrop36428	NA	NA	NA	NA	NA
hsairetrop39918	NA	ggoiretrop22737	ppy_retrop13582	mmu_retrom22982	NA	NA	NA	NA	NA
hsa_retrop12160	ptriretrop12233	ggo_retrop00872	ppy_retrop07626	mmu_retrop29351	NA	NA	NA	NA	NA
hsa_retrom09472	ptriretrop20080	ggoiretrom14778	ppy_retrom12066	mmu_retrom16382	NA	NA	NA	NA	NA
hsa_retrop44299	ptr_retrop07136	ggo_retrop02947	ppy_retrop14005	mmu_retrop25182	NA	NA	NA	NA	NA
hsa_retrom41724	ptr_retrom07092	ggo_retrom03012	ppy_retrom13081	mmu_retrom23259	NA	NA	NA	NA	NA
hsa_retrom26243	ptriretrom06037	ggoiretrom02775	ppyiretrom08379	mmu_retrop09860	NA	NA	NA	NA	NA
hsa_retrop12769	ptr_retrop03713	ggo_retrop00935	ppy_retrop07891	mmu_retrop29931	NA	NA	NA	NA	NA
hsa_retrop38844	ptr_retrop07480	ggo_retrop03214	NA	mmu_retrop37330	NA	NA	NA	NA	NA
hsa_retrom37791	ptriretrom23648	ggoiretrom19370	ppy_retrom12341	mmu_retrom20968	NA	NA	NA	NA	NA
hsa_retrop12760	ptr_retrop03709	ggo_retrop00933	ppy_retrop07888	mmu_retrop29922	NA	NA	NA	NA	NA
hsairetrop02602	ptriretrop40705	ggo_retrop04680	NA	NA	NA	NA	NA	NA	NA
hsa_retrom01837	ptriretrop39906	ggoiretrom34884	ppy_retrom18073	NA	NA	NA	NA	NA	NA
hsa_retrom35644	ptr_retrom07363	NA	ppy_retrop14458	mmu_retrop36767	mus_retrop53855	rnoiretrop26298	NA	NA	NA
hsa_retrop40286	ptr_retrop06666	ggo_retrop02514	ppy_retrop13112	NA	NA	NA	NA	NA	NA
hsa_retrop32920	ptriretrom31825	ggo_retrom01135	NA	mmuiretrop29257	NA	NA	NA	NA	NA
hsa_retrop01912	ptr_retrom10253	ggoiretrop35810	ppyiretrom40916	mmu_retrop38989	NA	NA	NA	NA	NA
hsa_retrom36016	ptr_retrom07454	ggo_retrom03222	NA	mmu_retrop36455	NA	NA	NA	NA	NA
hsa_retrop21518	ptriretrop13874	ggo_retrop01266	ppy_retrom08824	mmu_retrop19086	NA	NA	NA	NA	NA
hsairetrop11982	ptr_retrop03622	ggoiretrop07079	ppy_retrop07771	mmu_retrop29548	NA	NA	NA	NA	NA
hsa_retrop40446	ptr_retrop06674	ggo_retrop02525	ppyiretrop27917	NA	NA	NA	NA	NA	NA
hsa_retrom25910	ptriretrom05652	ggoiretrom02468	ppyiretrom07991	mmu_retrop10105	NA	NA	NA	NA	NA
hsa_retrom29984	ptr_retrom09223	ggoiretrom32750	NA	mmu_retrom32071	NA	NA	NA	NA	NA
hsa_retrom25916	ptr_retrom02117	ggoiretrom02710	ppyiretrom08003	mmu_retrop10100	NA	NA	NA	NA	NA
hsa_retrop40111	ptr_retrop06627	ggoiretrop19333	ppy_retrop13050	mmu_retrop22847	NA	NA	NA	NA	NA
hsa_retrom25914	ptr_retrom02116	ggo_retrom00406	ppy_retrom05065	NA	NA	NA	NA	NA	NA
hsa_retrom22612	ptr_retrop03943	ggoiretrom11146	NA	NA	NA	NA	NA	NA	NA
hsa_retrom14847	ptriretrom09821	ggoiretrom04196	ppy_retrom06585	NA	NA	NA	NA	NA	NA
hsa_retrop33343	ptriretrop33060	ggo_retrop03496	ppy_retrop16843	NA	NA	NA	NA	NA	NA
hsa_retrom30213	ptr_retrom09280	ggo_retrom04323	ppy_retrom16254	mmu_retrom32246	mus_retrom100510	NA	NA	NA	NA
hsa_retrop08698	ptr_retrop05018	ggoiretrop16183	NA	mmuiretrop16169	NA	NA	NA	NA	NA
hsa_retrom32703	ptr_retrom07762	ggo_retrom03656	ppy_retrom14143	mmu_retrom24369	NA	NA	NA	NA	NA
hsa_retrop40754	ptr_retrop05889	ggo_retrop01456	ppy_retrom11175	mmu_retrom11448	NA	NA	NA	NA	NA
hsa_retrop11093	ptr_retrop04053	ggoiretrop09059	NA	NA	NA	NA	NA	NA	NA
hsa_retrop16243	ptriretrom08895	ggo_retrom03487	ppy_retrop06208	mmu_retrop07737	NA	NA	NA	NA	NA
hsa_retrop43475	ptriretrop25486	ggo_retrop02823	ppy_retrop13673	mmu_retrop24299	NA	NA	NA	NA	NA
hsa_retrom32252	ptriretrom33194	ggoiretrom26982	ppyiretrom34911	mmu_retrom31304	NA	NA	NA	NA	NA
hsa_retrop40847	ptr_retrop05918	ggo_retrop01465	NA	NA	NA	NA	NA	NA	NA
hsa_retrop11094	ptr_retrop04055	ggo_retrop01168	ppy_retrop09145	NA	NA	NA	NA	NA	NA
hsa_retrom14544	ptriretrom11560	NA	ppy_retrom07328	mmu_retrom27384	NA	NA	NA	NA	NA
hsa_retrom26792	ptriretrom04576	ggo_retrom00078	ppy_retrom05275	mmuiretrom08468	NA	NA	NA	NA	NA
hsa_retrom26066	ptriretrom05924	ggo_retrom00439	ppyiretrom08240	mmuiretrop09803	NA	NA	NA	NA	NA
hsa_retrom14543	ptriretrom11550	ggoiretrom06165	ppyiretrom13408	NA	NA	NA	NA	NA	NA
hsa_retrop10579	ptriretrop20925	ggo_retrop01956	ppy_retrop12537	mmu_retrop18653	NA	NA	NA	NA	NA
hsa_retrom02937	ptr_retrom10538	ggo_retrom04706	ppy_retrop18661	NA	NA	NA	NA	NA	NA
hsa_retrom25683	ptr_retrom02056	NA	ppy_retrop05103	mmu_retrom08861	NA	NA	NA	NA	NA
hsa_retrop33281	ptr_retrop08884	ggo_retrop03485	NA	NA	NA	NA	NA	NA	NA
hsa_retrom02932	ptr_retrom10536	NA	ppy_retrop18664	mmu_retrom38438	NA	NA	NA	NA	NA
hsa_retrop36972	ptr_retrop08550	ggo_retrop03834	ppyiretrop34115	mmu_retrop27444	NA	NA	NA	NA	NA
hsa_retrom32643	ptr_retrom07751	ggoiretrom27912	NA	mmu_retrom24275	NA	NA	NA	NA	NA
hsa_retrop11552	ptr_retrop04142	ggo_retrop01220	NA	NA	NA	NA	NA	NA	NA
hsa_retrop01821	ptr_retrop10521	ggo_retrop04571	ppy_retrom18155	NA	NA	NA	NA	NA	NA
hsa_retrop05838	ptr_retrop05411	ggo_retrop02690	ppy_retrop10789	mmu_retrop17382	NA	NA	NA	NA	NA
hsa_retrom09278	ptriretrop20280	ggo_retrom01995	ppy_retrom12009	NA	NA	NA	NA	NA	NA
hsa_retrop17108	ptr_retrop02562	ggo_retrop00522	NA	mmu_retrop06816	NA	NA	NA	NA	NA
hsa_retrop17105	ptriretrop07959	ggo_retrop00521	ppy_retrop06969	mmu_retrop06811	NA	NA	NA	NA	NA
hsa_retrom32131	ptriretrom32982	ggoiretrom26417	ppy_retrom15889	NA	NA	NA	NA	NA	NA
hsa_retrom28994	ptr_retrom09799	ggo_retrom04132	ppy_retrom17162	mmu_retrop35201	NA	NA	NA	NA	NA
hsa_retrom28997	ptr_retrom09800	ggo_retrom04134	ppy_retrom17171	mmu_retrop35167	NA	NA	NA	NA	NA
hsa_retrom08059	ptr_retrom05205	ggo_retrom02425	ppy_retrom10006	mmu_retrom14093	NA	NA	NA	NA	NA
hsa_retrom40770	ptriretrom24975	ggo_retrom02894	ppyiretrom27432	mmu_retrom22456	NA	NA	NA	NA	NA
hsa_retrop06862	ptriretrop16679	ggo_retrop02128	ppy_retrom09429	mmu_retrom13084	NA	NA	NA	NA	NA
hsa_retrop41404	ptriretrop22438	ggoiretrop11502	NA	mmu_retrop13854	NA	NA	NA	NA	NA
hsa_retrop41312	ptriretrop22271	ggoiretrop11480	ppy_retrop11543	mmu_retrop13754	NA	NA	NA	NA	NA
hsa_retrom24407	ptriretrom14874	ggo_retrom01510	ppy_retrom08496	mmu_retrom20288	NA	NA	NA	NA	NA
hsa_retrom08055	ptriretrom17919	ggo_retrom02423	ppy_retrom10002	mmu_retrom14089	NA	NA	NA	NA	NA
hsa_retrom40509	ptr_retrom06548	ggoiretrom12328	ppy_retrom11549	mmu_retrop12863	NA	NA	NA	NA	NA
hsa_retrom35335	ptr_retrom08593	ggo_retrom03900	NA	NA	NA	NA	NA	NA	NA
hsa_retrop21680	ptriretrop14094	ggoiretrop10333	ppyiretrom16487	NA	NA	NA	NA	NA	NA
hsa_retrop03754	ptr_retrop10836	ggo_retrom04739	ppyiretrom39821	NA	NA	NA	NA	NA	NA
hsa_retrom34635	ptr_retrom00953	ggoiretrom29414	ppy_retrom15095	mmu_retrom26000	NA	NA	NA	NA	NA
hsa_retrop16472	ptriretrop09390	ggoiretrom26173	ppy_retrop01892	mmuiretrop06950	NA	NA	NA	NA	NA
hsa_retrop16473	ptr_retrop02835	ggoiretrom27321	ppy_retrop01894	NA	NA	NA	NA	NA	NA
hsa_retrom41142	NA	ggo_retrom02941	ppy_retrom12902	mmu_retrom22877	NA	NA	NA	NA	NA
hsa_retrop09935	ptr_retrom05916	ggoiretrop14507	NA	NA	NA	NA	NA	NA	NA
hsa_retrop16479	ptriretrop09409	ggo_retrom03439	ppyiretrop03313	mmu_retrop07811	NA	NA	NA	NA	NA
hsa_retrom08839	ptr_retrom05793	ggo_retrom01940	ppyiretrom24390	NA	NA	NA	NA	NA	NA
hsa_retrom01308	ptriretrom38759	ggo_retrom04563	ppy_retrop19059	NA	NA	NA	NA	NA	NA
hsa_retrom14495	ptr_retrom03465	ggo_retrom00815	NA	NA	NA	NA	NA	NA	NA
hsa_retrom16846	ptr_retrop02536	ggoiretrom03496	ppyiretrop12375	mmu_retrop06623	NA	NA	NA	NA	NA
hsa_retrop32578	ptr_retrom08895	ggo_retrom01200	NA	NA	NA	NA	NA	NA	NA
hsa_retrop06903	ptr_retrop04600	ggo_retrop02132	ppy_retrom09403	mmu_retrom13006	NA	NA	NA	NA	NA
hsa_retrop42575	ptr_retrop06711	ggo_retrop02719	ppy_retrop13294	NA	NA	NA	NA	NA	NA
hsa_retrom18354	ptriretrom06500	ggo_retrom00213	NA	NA	NA	NA	NA	NA	NA
hsa_retrom04741	ptr_retrom05563	ggo_retrom02813	ppy_retrop10614	mmu_retrop16879	NA	NA	NA	NA	NA
hsa_retrom18356	ptr_retrom02360	ggo_retrom00216	ppy_retrom03453	mmu_retrom03364	NA	NA	NA	NA	NA
hsa_retrom38349	ptr_retrom06840	NA	ppyiretrom26891	mmu_retrom21363	NA	NA	NA	NA	NA
hsa_retrop43578	ptr_retrop06915	ggo_retrop02837	ppy_retrop13708	NA	NA	NA	NA	NA	NA
hsa_retrop24939	ptriretrop43223	ggoiretrop13018	NA	mmuiretrop11966	NA	NA	NA	NA	NA
hsa_retrop15251	ptr_retrop03087	ggo_retrom00673	ppy_retrop06678	mmu_retrop08850	NA	NA	NA	NA	NA
hsa_retrop18330	ptr_retrop02321	ggo_retrop00250	NA	NA	NA	NA	NA	NA	NA
hsa_retrop10321	ptr_retrom05828	ggo_retrop01920	ppy_retrop12439	mmu_retrop18311	NA	NA	NA	NA	NA
hsa_retrop24935	ptr_retrop11535	ggo_retrop01721	ppy_retrop11089	NA	NA	NA	NA	NA	NA
hsa_retrop24937	ptr_retrop11536	ggo_retrop01722	ppyiretrop22566	mmu_retrop12623	NA	NA	NA	NA	NA
hsa_retrom15634	ptr_retrom03324	ggo_retrom00708	NA	mmu_retrom07604	NA	NA	NA	NA	NA
hsa_retrom08454	ptr_retrom05390	ggo_retrom02474	ppy_retrom10256	mmu_retrom14348	NA	NA	NA	NA	NA
hsa_retrom16849	ptr_retrop02535	ggo_retrom00485	ppy_retrop06895	mmu_retrop06619	NA	NA	NA	NA	NA
hsa_retrom15630	ptr_retrom03323	ggo_retrom00707	ppyiretrom11979	NA	NA	NA	NA	NA	NA
hsa_retrom24434	ptr_retrom04305	NA	ppy_retrom08503	mmu_retrom20303	NA	NA	NA	NA	NA
hsa_retrom09909	ptriretrom21808	ggoiretrom14920	NA	NA	NA	NA	NA	NA	NA
hsairetrop05565	ptr_retrop04209	ggoiretrop17149	NA	NA	NA	NA	NA	NA	NA
hsa_retrop31475	ptriretrom33843	ggoiretrop33594	ppy_retrop17392	mmu_retrom31851	NA	NA	NA	NA	NA
hsa_retrom10469	ptr_retrom04427	ggo_retrom01314	ppyiretrom17335	NA	NA	NA	NA	NA	NA
hsa_retrom09902	ptr_retrom06091	ggo_retrom02097	ppyiretrom25697	mmu_retrom17080	NA	NA	NA	NA	NA
hsa_retrom24796	ptriretrom41358	ggoiretrom13198	ppyiretrom21635	NA	NA	NA	NA	NA	NA
hsa_retrom34569	ptriretrom30077	ggoiretrom28432	ppyiretrom32186	mmu_retrom25964	NA	NA	NA	NA	NA
hsa_retrop42378	ptr_retrop06295	ggo_retrop01603	ppy_retrop11997	NA	NA	NA	NA	NA	NA
hsa_retrom30600	ptr_retrom09374	ggo_retrom04381	ppy_retrom16360	mmu_retrom32555	NA	NA	NA	NA	NA
hsa_retrom10489	ptr_retrom04435	ggoiretrom09659	ppy_retrom09051	NA	NA	NA	NA	NA	NA
hsa_retrop08694	NA	ggo_retrop02288	ppyiretrop19893	mmu_retrop15901	NA	NA	NA	NA	NA
hsa_retrom10483	ptr_retrom04434	NA	ppy_retrom09047	mmu_retrom08075	NA	NA	NA	NA	NA
hsa_retrop31310	ptr_retrom09211	ggoiretrop33555	NA	mmu_retrop32928	NA	NA	NA	NA	NA
hsa_retrop01045	ptriretrop39047	ggo_retrop04490	NA	NA	NA	NA	NA	NA	NA
hsa_retrom28068	ptr_retrom09503	ggo_retrom04001	ppy_retrop17958	mmu_retrop34530	NA	NA	NA	NA	NA
hsa_retrom25829	ptr_retrom02098	NA	ppy_retrom05015	mmu_retrom09107	NA	NA	NA	NA	NA
hsa_retrop11317	ptr_retrop01597	ggoiretrop09461	NA	NA	NA	NA	NA	NA	NA
hsa_retrop09618	NA	ggo_retrop01816	ppy_retrop12163	mmu_retrop17798	NA	NA	NA	NA	NA
hsa_retrom24221	ptr_retrom04268	ggo_retrom01495	ppy_retrom08450	mmu_retrom20177	NA	NA	NA	NA	NA
hsa_retrop24731	ptriretrop42886	ggo_retrop01687	ppy_retrop11019	mmu_retrop12411	NA	NA	NA	NA	NA
hsa_retrop24736	ptr_retrop11498	ggoiretrop12959	ppy_retrop11021	mmuiretrop12231	NA	NA	NA	NA	NA
hsairetrop10343	ptriretrop21399	ggo_retrop02010	NA	NA	NA	NA	NA	NA	NA
hsa_retrop18209	ptriretrop06512	ggoiretrop01617	NA	NA	NA	NA	NA	NA	NA
hsa_retrop36932	ptr_retrop08542	ggo_retrop03828	ppy_retrop16250	NA	NA	NA	NA	NA	NA
hsa_retrom25313	ptr_retrom11161	ggo_retrom01852	ppy_retrom11009	mmu_retrom10471	NA	NA	NA	NA	NA
hsa_retrop24710	ptr_retrop11491	ggo_retrop01681	ppy_retrop10988	mmu_retrop12323	NA	NA	NA	NA	NA
hsa_retrop03571	ptr_retrop10796	ggoiretrop34927	NA	NA	NA	NA	NA	NA	NA
hsa_retrop42288	ptr_retrop06276	ggo_retrop01589	NA	mmu_retrom10836	NA	NA	NA	NA	NA
hsa_retrom34143	ptr_retrom08286	ggo_retrom03719	ppy_retrom14920	mmu_retrom25553	NA	NA	NA	NA	NA
hsa_retrom14034	ptr_retrom03366	ggo_retrom00743	ppy_retrom07132	mmu_retrom26875	NA	NA	NA	NA	NA
hsa_retrom34413	ptriretrom29786	ggo_retrom03756	ppy_retrom15023	NA	NA	NA	NA	NA	NA
hsa_retrom00786	ptr_retrom10011	ggo_retrom04490	ppy_retrop19265	NA	NA	NA	NA	NA	NA
hsa_retrop27647	ptr_retrop01908	ggoiretrop00651	NA	NA	NA	NA	NA	NA	NA
hsa_retrop28248	ptriretrop36228	ggo_retrop03949	ppyiretrom37882	mmu_retrop35834	NA	NA	NA	NA	NA
hsairetrop12616	ptr_retrop03752	ggo_retrop00969	ppy_retrop07962	mmu_retrop30159	NA	NA	NA	NA	NA
hsa_retrop28242	ptr_retrop09883	ggo_retrop03948	ppy_retrom16939	NA	NA	NA	NA	NA	NA
hsa_retrom15389	ptr_retrom03244	ggo_retrom00646	ppy_retrom06752	mmu_retrom07169	NA	NA	NA	NA	NA
hsa_retrop05585	ptr_retrop05354	ggo_retrop02644	NA	NA	NA	NA	NA	NA	NA
hsa_retrom38129	ptr_retrom06795	ggo_retrom02613	ppy_retrom12468	mmu_retrom21230	NA	NA	NA	NA	NA
hsa_retrom34897	ptriretrom30464	ggoiretrom27822	ppyiretrom32518	mmuiretrom21835	NA	NA	NA	NA	NA
hsa_retrom28331	ptr_retrom09590	ggo_retrom04030	ppyiretrom37112	NA	NA	NA	NA	NA	NA
hsa_retrom42559	ptr_retrom07257	ggo_retrom03099	ppy_retrom13367	mmu_retrom23981	NA	NA	NA	NA	NA
hsa_retrom16953	ptriretrom07938	ggoiretrom03610	NA	NA	NA	NA	NA	NA	NA
hsa_retrom16954	ptriretrom07941	NA	ppy_retrom06979	mmu_retrom05568	NA	NA	NA	NA	NA
hsa_retrom22379	ptr_retrom04139	ggo_retrom01419	ppy_retrop08979	NA	NA	NA	NA	NA	NA
hsa_retrom38122	ptr_retrom06794	ggo_retrom02612	NA	NA	NA	NA	NA	NA	NA
hsa_retrop00382	ptr_retrop10327	ggo_retrop04456	ppy_retrom18592	mmuiretrop37900	NA	NA	NA	NA	NA
hsa_retrop05345	ptr_retrop05295	ggo_retrop02610	ppyiretrom20781	NA	NA	NA	NA	NA	NA
hsa_retrom11285	ptr_retrom03722	ggo_retrom00931	ppy_retrom07641	NA	NA	NA	NA	NA	NA
hsa_retrop05341	ptr_retrop05292	ggo_retrop02609	ppy_retrom10528	mmu_retrom15063	NA	NA	NA	NA	NA
hsa_retrom16420	ptriretrop08706	ggo_retrop03370	ppy_retrop06269	mmuiretrom05581	NA	NA	NA	NA	NA
hsairetrop13582	ptriretrop11217	ggo_retrop00740	ppy_retrop07190	NA	NA	NA	NA	NA	NA
hsa_retrop39850	ptr_retrop06563	ggoiretrop19274	ppyiretrop27243	mmu_retrop22655	NA	NA	NA	NA	NA
hsa_retrop36599	ptr_retrop08432	ggo_retrop03775	ppy_retrop16107	mmu_retrop26971	NA	NA	NA	NA	NA
hsa_retrop36843	ptriretrop30962	ggo_retrop03814	NA	mmu_retrop27319	NA	NA	NA	NA	NA
hsa_retrom08214	NA	ggoiretrom17034	ppyiretrom19770	mmuiretrom13479	NA	NA	NA	NA	NA
hsa_retrom27555	ptr_retrom09475	ggo_retrom03974	ppyiretrop39526	NA	NA	NA	NA	NA	NA
hsa_retrom15454	ptr_retrom03269	ggoiretrom04298	ppy_retrom06795	mmu_retrom07277	NA	NA	NA	NA	NA
hsa_retrom15452	ptr_retrom03267	ggo_retrom00663	ppy_retrom06791	mmu_retrom07269	NA	NA	NA	NA	NA
hsa_retrop12990	ptr_retrop03757	ggo_retrop00972	ppy_retrop07965	NA	NA	NA	NA	NA	NA
hsa_retrom31462	ptr_retrop08728	ggoiretrop08024	ppy_retrom15652	NA	NA	NA	NA	NA	NA
hsa_retrom00872	ptr_retrom10032	ggo_retrom04503	NA	mmu_retrom36474	NA	NA	NA	NA	NA
hsa_retrom31460	ptr_retrop08730	ggo_retrop01084	NA	mmu_retrom30499	NA	NA	NA	NA	NA
hsa_retrom31396	ptr_retrop08743	ggo_retrop01096	ppy_retrom15638	mmu_retrom30456	mus_retrop52885	rnoiretrop42635	NA	NA	NA
hsa_retrom21416	ptr_retrom02643	ggo_retrom00334	NA	NA	NA	NA	NA	NA	NA
hsa_retrop28020	ptr_retrop09849	ggo_retrop03929	ppyiretrom38082	mmu_retrop35608	NA	NA	NA	NA	NA
hsa_retrom11514	ptr_retrom03785	ggo_retrom00973	ppy_retrom07797	mmu_retrom29034	NA	NA	NA	NA	NA
hsa_retrop28025	ptriretrop36012	ggo_retrop03930	ppy_retrom17009	mmuiretrop33361	NA	NA	NA	NA	NA
hsairetrop34050	ptriretrop26823	ggoiretrop24825	NA	mmuiretrom34042	NA	NA	NA	NA	NA
hsa_retrop28753	ptriretrop36372	ggoiretrop31401	NA	NA	NA	NA	NA	NA	NA
hsairetrop12501	ptriretrop13183	ggoiretrop07609	ppyiretrop15081	NA	NA	NA	NA	NA	NA
hsa_retrop10688	ptr_retrop05720	ggoiretrop14679	ppyiretrop26220	NA	mus_retrop71221	rnoiretrom23055	NA	NA	NA
hsa_retrom14504	ptr_retrom03467	ggo_retrom00816	ppy_retrom07305	NA	NA	NA	NA	NA	NA
hsa_retrop13176	NA	ggoiretrop07820	ppy_retrop08030	mmu_retrop30353	NA	NA	NA	NA	NA
hsa_retrom03278	ptr_retrom10639	ggo_retrom04768	ppy_retrop18515	NA	NA	NA	NA	NA	NA
hsa_retrop38605	ptr_retrop07417	ggo_retrop03163	ppy_retrop14533	NA	NA	NA	NA	NA	NA
hsa_retrom03275	ptriretrom40494	ggo_retrom04767	ppy_retrop18518	mmu_retrop39563	NA	NA	NA	NA	NA
hsa_retrom40219	ptr_retrom06449	ggo_retrom01668	ppy_retrom11470	mmu_retrom12082	NA	NA	NA	NA	NA
hsa_retrom16886	ptriretrop07698	ggoiretrom03418	NA	NA	NA	NA	NA	NA	NA
hsa_retrom16555	ptr_retrom03100	ggo_retrop03335	ppy_retrom06467	NA	NA	NA	NA	NA	NA
hsairetrom27981	ptriretrom34752	ggoiretrom33223	ppyiretrom36223	mmu_retrom32384	NA	NA	NA	NA	NA
hsa_retrop13224	ptr_retrop03805	ggo_retrop01003	ppy_retrop08043	mmu_retrop30360	NA	NA	NA	NA	NA
hsa_retrom16553	ptriretrom09344	ggo_retrop03337	ppyiretrom10772	NA	NA	NA	NA	NA	NA
hsa_retrom41610	ptriretrom25670	ggoiretrom23895	ppyiretrom28237	mmu_retrom23178	NA	NA	NA	NA	NA
hsa_retrop39882	ptr_retrop06577	ggo_retrop02459	ppy_retrop12929	mmu_retrop22687	NA	NA	NA	NA	NA
hsa_retrom11351	ptr_retrom03742	ggo_retrom00944	ppyiretrom14440	mmu_retrom28796	NA	NA	NA	NA	NA
hsa_retrop12570	ptr_retrop03653	ggoiretrop06632	ppy_retrop07839	NA	NA	NA	NA	NA	NA
hsa_retrop31864	ptriretrop35170	ggoiretrop33384	NA	mmu_retrop33355	NA	NA	NA	NA	NA
hsa_retrop29276	ptr_retrop10000	ggo_retrop04025	ppy_retrop17810	mmu_retrop33880	NA	NA	NA	NA	NA
hsa_retrop38674	ptr_retrop07438	ggoiretrop24404	ppy_retrop14573	mmu_retrop37134	NA	NA	NA	NA	NA
hsa_retrop13001	ptriretrop13346	ggo_retrop00973	ppyiretrop15233	NA	NA	NA	NA	NA	NA
hsa_retrop25247	ptr_retrop01993	ggo_retrop00396	NA	mmu_retrop10220	NA	NA	NA	NA	NA
hsa_retrop28116	ptr_retrop09862	ggo_retrop03938	ppy_retrom16990	mmuiretrop33948	NA	NA	NA	NA	NA
hsa_retrop17249	ptriretrop08143	ggoiretrop03568	ppyiretrop12773	mmu_retrop06965	NA	NA	NA	NA	NA
hsa_retrop40618	ptr_retrop05823	ggo_retrop01432	ppy_retrom11309	mmu_retrom11744	NA	NA	NA	NA	NA
hsa_retrop28112	ptriretrop36095	ggoiretrop32914	ppy_retrom16991	NA	NA	NA	NA	NA	NA
hsa_retrom36011	ptr_retrom07450	ggo_retrom03210	NA	mmu_retrop36473	NA	NA	NA	NA	NA
hsa_retrop29196	ptriretrop36782	ggo_retrop04013	ppyiretrom37295	NA	NA	NA	NA	NA	NA
hsa_retrop17246	ptriretrop08134	ggo_retrop00542	ppy_retrop07038	NA	NA	NA	NA	NA	NA
hsa_retrom35760	ptriretrom27052	ggoiretrom24413	NA	mmu_retrop36658	NA	NA	NA	NA	NA
hsa_retrop30208	ptr_retrop10200	ggo_retrop04145	ppy_retrop18189	mmu_retrom33870	NA	NA	NA	NA	NA
hsa_retrop10594	ptr_retrop05695	ggo_retrop01959	ppy_retrop12548	mmu_retrop18692	NA	NA	NA	NA	NA
hsairetrom03253	NA	ggo_retrom04806	ppyiretrop40787	mmuiretrop39741	musiretrop13650	rno_retrop01817	NA	NA	NA
hsa_retrop25644	ptr_retrop02060	ggo_retrop00442	ppy_retrop05186	mmu_retrom08648	NA	NA	NA	NA	NA
hsa_retrop17481	ptriretrop06224	ggo_retrop00189	NA	mmu_retrop03923	NA	NA	NA	NA	NA
hsa_retrom28745	ptriretrom36578	ggo_retrom04090	ppy_retrom17032	mmu_retrop35544	NA	NA	NA	NA	NA
hsairetrom26364	ptriretrom37131	ggoiretrom31500	NA	NA	NA	NA	NA	NA	NA
hsa_retrom28747	ptr_retrom09731	ggoiretrom30446	ppy_retrom17033	NA	NA	NA	NA	NA	NA
hsa_retrom03307	ptr_retrom10643	ggoiretrom36547	NA	NA	NA	NA	NA	NA	NA
hsa_retrom28188	ptriretrom35850	ggoiretrom32140	ppyiretrop39153	mmuiretrop34646	NA	NA	NA	NA	NA
hsa_retrop32710	ptr_retrom08860	NA	ppyiretrop35197	mmu_retrop30824	NA	NA	NA	NA	NA
hsa_retrop11629	ptr_retrop04170	ggo_retrop01232	ppy_retrop09340	mmu_retrop09678	NA	NA	NA	NA	NA
hsa_retrop11625	ptr_retrop04169	ggo_retrop01231	ppy_retrop09339	mmu_retrop09675	NA	NA	NA	NA	NA
hsa_retrop42902	NA	ggoiretrop22102	ppyiretrop28529	mmu_retrop23850	NA	NA	NA	NA	NA
hsa_retrom27253	ptr_retrom02027	ggo_retrom00144	ppy_retrom02871	mmu_retrom09650	NA	NA	NA	NA	NA
hsa_retrop04973	ptr_retrop05256	ggo_retrop02565	NA	NA	NA	NA	NA	NA	NA
hsa_retrop08988	ptriretrop18012	ggo_retrop02339	ppy_retrop10301	mmu_retrop16155	NA	NA	NA	NA	NA
hsa_retrop31918	ptriretrop35227	ggoiretrop33677	NA	NA	NA	NA	NA	NA	NA
hsa_retrop40726	ptriretrop21807	ggoiretrop11401	ppyiretrom22946	mmu_retrom11515	NA	NA	NA	NA	NA
hsa_retrop08983	ptr_retrop05090	ggo_retrop02338	ppyiretrop20325	mmu_retrop16149	NA	NA	NA	NA	NA
hsairetrom11909	ptriretrom12929	ggoiretrom07882	ppyiretrom14752	NA	NA	NA	NA	NA	NA
hsairetrop03348	ptriretrop41481	ggoiretrop37618	ppyiretrom39556	mmuiretrom37928	NA	NA	NA	NA	NA
hsa_retrop40057	ptr_retrop06611	ggo_retrop02478	NA	NA	NA	NA	NA	NA	NA
hsairetrom09635	ptr_retrom06045	ggoiretrom15314	ppyiretrom25385	mmu_retrom16741	NA	NA	NA	NA	NA
hsa_retrop22047	ptr_retrop03934	ggo_retrop01330	ppy_retrom08557	mmu_retrop19863	NA	NA	NA	NA	NA
hsa_retrop40724	ptr_retrop05873	ggo_retrop01449	ppy_retrom11216	mmu_retrom11519	NA	NA	NA	NA	NA
hsa_retrop38218	ptr_retrop07368	ggo_retrop03132	ppy_retrom13556	mmu_retrom34847	NA	NA	NA	NA	NA
hsa_retrop05624	ptriretrop19066	ggoiretrop20980	ppyiretrop21347	mmu_retrop17125	NA	NA	NA	NA	NA
hsa_retrop37080	ptr_retrop08582	ggoiretrop29258	ppy_retrop16320	NA	NA	NA	NA	NA	NA
hsa_retrop37081	ptr_retrop08583	ggoiretrop29558	ppyiretrop34300	mmu_retrom26603	NA	NA	NA	NA	NA
hsa_retrop35585	ptr_retrop08037	ggo_retrop03682	NA	NA	NA	NA	NA	NA	NA
hsa_retrop05622	ptriretrop19060	ggoiretrop20604	NA	mmuiretrop17027	NA	NA	NA	NA	NA
hsa_retrom09486	ptr_retrop05537	ggo_retrom02020	ppy_retrom12080	mmu_retrom16460	NA	NA	NA	NA	NA
hsa_retrop13483	ptr_retrop03176	ggo_retrop00711	ppyiretrop13066	NA	NA	NA	NA	NA	NA
hsa_retrom09484	ptr_retrop05538	NA	ppy_retrom12079	mmu_retrom16424	NA	NA	NA	NA	NA
hsa_retrom38526	ptr_retrom06886	ggo_retrom02706	NA	NA	NA	NA	NA	NA	NA
hsa_retrop35589	ptriretrop29817	ggoiretrop28995	NA	NA	NA	NA	NA	NA	NA
hsa_retrop25087	ptr_retrop11570	ggo_retrop01745	ppy_retrop11131	mmu_retrop12718	NA	NA	NA	NA	NA
hsa_retrop25085	ptr_retrop11569	ggo_retrop01744	ppy_retrop11130	mmu_retrop12717	NA	NA	NA	NA	NA
hsa_retrom06155	ptr_retrom04907	ggo_retrom02204	ppy_retrop09714	mmu_retrop14907	NA	NA	NA	NA	NA
hsa_retrom28363	ptr_retrom09598	ggoiretrom30392	ppy_retrop17794	mmu_retrom32668	NA	NA	NA	NA	NA
hsa_retrop10668	ptr_retrop05714	ggo_retrop01974	ppy_retrop12566	mmu_retrop18747	NA	NA	NA	NA	NA
hsa_retrop43278	ptr_retrop06859	ggo_retrop02799	ppy_retrop13615	mmu_retrop24061	NA	NA	NA	NA	NA
hsa_retrom37834	ptr_retrom06711	ggoiretrom19896	ppyiretrom26224	NA	NA	NA	NA	NA	NA
hsa_retrom42256	ptr_retrom07205	ggo_retrom03071	ppy_retrom13274	mmu_retrom23806	NA	NA	NA	NA	NA
hsairetrop37086	ptr_retrop06643	ggoiretrop19117	ppy_retrop13073	NA	NA	NA	NA	NA	NA
hsa_retrom26493	ptr_retrom01886	ggo_retrom00054	ppy_retrom02969	mmu_retrop35975	NA	NA	NA	NA	NA
hsairetrom11226	ptriretrom12199	ggo_retrom00900	ppyiretrom14013	NA	NA	NA	NA	NA	NA
hsa_retrom22135	ptr_retrom04082	ggo_retrom01371	NA	NA	NA	NA	NA	NA	NA
hsa_retrom29832	ptr_retrop09640	NA	ppy_retrom16133	mmu_retrop33041	NA	NA	NA	NA	NA
hsa_retrop29556	ptr_retrop10077	ggo_retrop04058	ppy_retrom16451	NA	NA	NA	NA	NA	NA
hsa_retrom26498	ptriretrom04385	ggoiretrom00407	NA	NA	NA	NA	NA	NA	NA
hsa_retrop36749	ptr_retrop08463	ggo_retrop03795	ppy_retrop16168	mmu_retrop27157	NA	NA	NA	NA	NA
hsa_retrop31143	ptr_retrop09576	ggo_retrop04204	ppy_retrop17268	NA	NA	NA	NA	NA	NA
hsa_retrop12751	ptr_retrop03708	NA	ppy_retrop07885	mmu_retrop29917	NA	NA	NA	NA	NA
hsa_retrop10462	ptr_retrop05661	ggo_retrop01936	ppy_retrop12494	mmuiretrop18139	NA	NA	NA	NA	NA
hsa_retrom26258	ptr_retrom02178	ggo_retrom00458	ppy_retrom05195	NA	NA	NA	NA	NA	NA
hsa_retrop43276	ptr_retrop06858	ggoiretrop22755	ppy_retrop13613	mmu_retrop24059	NA	NA	NA	NA	NA
hsa_retrop08859	ptr_retrop05056	ggo_retrop02310	ppy_retrop10245	mmu_retrop16039	NA	NA	NA	NA	NA
hsa_retrom17170	ptr_retrom02818	ggo_retrom00565	NA	NA	NA	NA	NA	NA	NA
hsa_retrop35030	ptr_retrop07703	ggo_retrop03660	ppy_retrop15268	mmu_retrop25692	NA	NA	NA	NA	NA
hsa_retrop01900	ptr_retrom10257	ggoiretrop35806	ppy_retrom18111	mmu_retrop38981	NA	NA	NA	NA	NA
hsa_retrom32068	ptr_retrom08991	ggo_retrom03587	ppy_retrom15854	mmu_retrom31060	mus_retrom41298	rno_retrom00583	NA	NA	NA
hsa_retrop16219	ptr_retrom03032	ggo_retrom03489	ppy_retrop06202	mmu_retrop07723	NA	NA	NA	NA	NA
hsa_retrom36234	ptr_retrom07548	ggoiretrom24514	ppyiretrop31178	mmu_retrop36915	NA	NA	NA	NA	NA
hsa_retrom06331	ptr_retrom04962	ggoiretrom18359	ppy_retrop09633	NA	NA	NA	NA	NA	NA
hsa_retrop40433	ptriretrop24527	ggo_retrop02520	NA	NA	NA	NA	NA	NA	NA
hsa_retrom38454	ptr_retrom06865	NA	ppyiretrom27053	mmu_retrom21437	NA	NA	NA	NA	NA
hsa_retrop17068	ptriretrop07881	ggo_retrop00512	ppyiretrop12504	mmu_retrop06776	NA	NA	NA	NA	NA
hsa_retrom07798	ptr_retrom05140	ggo_retrom02372	ppy_retrom09883	mmuiretrom14760	NA	NA	NA	NA	NA
hsa_retrop12685	ptr_retrop03681	ggo_retrop00922	ppy_retrop07868	mmu_retrop29840	mus_retrop54112	rnoiretrop26842	mdo_retrom28157	oan_retrop133005	gga_retrop27561
hsa_retrop34695	ptr_retrop09501	ggoiretrop26812	NA	NA	NA	NA	NA	NA	NA
hsa_retrom30568	ptr_retrom09370	ggo_retrom04378	ppy_retrom16353	mmu_retrom32551	NA	NA	NA	NA	NA
hsa_retrom32710	ptr_retrom07764	ggo_retrom03657	ppy_retrom14146	mmu_retrom24388	NA	NA	NA	NA	NA
hsa_retrom25070	ptr_retrom11093	ggo_retrom01817	ppy_retrom10912	mmu_retrom10094	NA	NA	NA	NA	NA
hsairetrom35592	ptriretrom24040	ggo_retrom02595	ppy_retrom12425	mmu_retrom21180	NA	NA	NA	NA	NA
hsa_retrom08206	ptr_retrom05253	ggo_retrom02444	ppy_retrom10069	NA	NA	NA	NA	NA	NA
hsa_retrop11086	ptr_retrop04052	ggo_retrop01166	NA	NA	NA	NA	NA	NA	NA
hsa_retrom32249	ptr_retrom09030	ggo_retrom03619	NA	NA	NA	NA	NA	NA	NA
hsa_retrom25677	ptr_retrom02053	NA	ppy_retrop05107	mmu_retrom08846	NA	NA	NA	NA	NA
hsa_retrom25675	ptr_retrom02052	NA	ppyiretrop08544	mmuiretrom08439	NA	NA	NA	NA	NA
hsa_retrop13810	ptr_retrop03250	ggoiretrop05392	ppy_retrop07259	NA	NA	NA	NA	NA	NA
hsa_retrom29909	ptriretrop34565	ggo_retrom04277	ppy_retrom16166	mmu_retrop32951	mus_retrom96895	rnoiretrop16398	NA	NA	NA
hsa_retrom41358	ptr_retrom07026	ggoiretrom22540	ppyiretrom28027	mmu_retrom23028	NA	NA	NA	NA	NA
hsairetrom02076	ptriretrom39396	ggo_retrom04647	ppy_retrop18816	mmu_retrom37642	NA	NA	NA	NA	NA
hsairetrop03653	ptr_retrop10962	ggoiretrop37654	ppyiretrom39266	mmuiretrom37309	NA	NA	NA	NA	NA
hsairetrop32702	ptriretrop30674	ggoiretrop28764	ppy_retrop16117	mmuiretrop23647	NA	NA	NA	NA	NA
hsa_retrom05023	ptr_retrom05641	ggoiretrom21195	ppy_retrom10678	mmu_retrom15513	NA	NA	NA	NA	NA
hsa_retrop16508	ptr_retrop02840	ggo_retrom03437	ppyiretrom10562	mmuiretrop06956	NA	rno_retrom01991	mdoiretrom21894	NA	ggairetrop07140
hsa_retrom01228	ptr_retrom10132	ggoiretrom35793	ppy_retrop19091	mmu_retrom36797	NA	NA	NA	NA	NA
hsa_retrop16502	ptr_retrop02838	ggo_retrom03438	ppy_retrom06395	mmu_retrop07823	NA	NA	NA	NA	NA
hsa_retrop33384	ptriretrop33129	NA	ppy_retrop16855	mmu_retrom31006	NA	NA	NA	NA	NA
hsa_retrop05808	ptr_retrop05401	ggo_retrop02682	ppy_retrop10770	mmu_retrop17332	NA	NA	NA	NA	NA
hsa_retrop01834	ptriretrop39806	ggoiretrop35776	NA	NA	NA	NA	NA	NA	NA
hsa_retrop01837	ptr_retrop10522	ggo_retrop04575	ppy_retrom18152	mmu_retrop38937	NA	NA	NA	NA	NA
hsa_retrop17114	ptriretrop07980	ggo_retrop00523	ppyiretrop12591	mmu_retrop06822	NA	NA	NA	NA	NA
hsa_retrop17115	ptr_retrop02565	ggo_retrop00525	ppy_retrop06982	NA	NA	NA	NA	NA	NA
hsa_retrop25531	ptr_retrop02027	ggoiretrop03212	NA	NA	NA	NA	NA	NA	NA
hsa_retrop39461	ptr_retrop00684	NA	ppyiretrom25834	mmuiretrom20147	NA	NA	NA	NA	NA
hsa_retrom07729	ptr_retrom05121	ggo_retrom02359	ppy_retrom09850	NA	NA	NA	NA	NA	NA
hsa_retrom28984	ptr_retrom09798	ggo_retrom04131	ppy_retrom17160	mmu_retrop35236	NA	NA	NA	NA	NA
hsa_retrom40785	ptr_retrom06922	ggo_retrom02897	ppy_retrom12771	mmu_retrom22481	NA	NA	NA	NA	NA
hsa_retrop03749	ptr_retrop10835	ggoiretrop36053	ppyiretrom39829	mmu_retrom38201	NA	NA	NA	NA	NA
hsa_retrom08515	ptriretrom18350	ggo_retrom02482	ppy_retrom10265	mmu_retrom14380	NA	NA	NA	NA	NA
hsa_retrop05782	ptr_retrop05396	ggo_retrop02678	NA	mmu_retrop17301	NA	NA	NA	NA	NA
hsa_retrom40533	ptr_retrom06556	ggo_retrom01711	NA	mmu_retrop12825	NA	NA	NA	NA	NA
hsa_retrop34866	ptr_retrop07661	ggo_retrop03632	ppyiretrop32440	mmu_retrop25526	NA	NA	NA	NA	NA
hsa_retrop25534	ptr_retrop02029	ggo_retrop00425	ppy_retrop05125	mmu_retrom08800	mus_retrop112296	rnoiretrop35108	NA	NA	NA
hsa_retrom40461	ptr_retrom06525	ggo_retrom01694	ppy_retrom11537	NA	NA	NA	NA	NA	NA
hsa_retrom25783	ptr_retrom02080	ggo_retrom00368	ppy_retrom04979	mmu_retrom08952	NA	NA	NA	NA	NA
hsa_retrop09927	ptriretrom20691	NA	ppy_retrop12286	mmu_retrop18022	NA	NA	NA	NA	NA
hsa_retrom26478	ptr_retrom01881	ggo_retrom00049	ppy_retrom02961	mmu_retrop35985	NA	NA	NA	NA	NA
hsa_retrop09921	ptr_retrom05920	ggo_retrop01870	ppyiretrop25395	mmuiretrop19237	NA	NA	NA	NA	NA
hsa_retrop24848	ptr_retrop11511	ggoiretrop12625	ppy_retrop11047	mmu_retrop12501	NA	NA	NA	NA	NA
hsa_retrop03183	ptr_retrop10695	ggo_retrop04649	NA	NA	NA	NA	NA	NA	NA
hsa_retrop03186	ptr_retrop10696	ggo_retrop04651	ppy_retrom17979	mmu_retrop39191	NA	NA	NA	NA	NA
hsa_retrom26471	ptr_retrom01879	ggo_retrom00046	ppy_retrom02957	NA	NA	NA	NA	NA	NA
hsa_retrop09929	ptr_retrom05917	ggo_retrop01872	ppy_retrop12287	mmu_retrop18025	NA	NA	NA	NA	NA
hsa_retrom25895	ptriretrom05635	ggoiretrom02706	NA	NA	NA	NA	NA	NA	NA
hsa_retrom14483	ptr_retrom03464	ggo_retrom00813	ppy_retrom07302	NA	NA	NA	NA	NA	NA
hsa_retrom41286	NA	ggo_retrom02961	ppy_retrom12952	mmu_retrom22989	NA	NA	NA	NA	NA
hsa_retrom33623	ptr_retrom08087	ggo_retrom03697	ppy_retrom14648	NA	NA	NA	NA	NA	NA
hsa_retrop42618	ptr_retrop06730	ggoiretrop23007	ppy_retrop13315	mmu_retrop23557	NA	NA	NA	NA	NA
hsa_retrom01642	ptr_retrop10573	ggo_retrom04617	ppy_retrop18932	mmu_retrom37474	NA	NA	NA	NA	NA
hsa_retrom14807	ptriretrom09755	ggoiretrom03954	NA	NA	NA	NA	NA	NA	NA
hsa_retrop43561	ptr_retrop06913	ggo_retrop02835	NA	mmu_retrop24357	NA	NA	NA	NA	NA
hsa_retrom14803	ptr_retrom06621	ggo_retrom00578	NA	mmu_retrop08400	NA	NA	NA	NA	NA
hsa_retrom34394	ptriretrom29759	ggoiretrom28370	ppy_retrom00057	mmu_retrom25734	NA	NA	NA	NA	NA
hsairetrop05396	ptriretrop19450	ggo_retrop02696	ppy_retrop10795	NA	NA	NA	NA	NA	NA
hsa_retrop12961	ptr_retrop03749	ggo_retrop00966	ppy_retrop07954	NA	NA	NA	NA	NA	NA
hsa_retrom04178	ptr_retrom05493	ggo_retrom02749	ppy_retrom10391	NA	NA	NA	NA	NA	NA
hsa_retrop39482	ptriretrop02716	ggoiretrop19172	ppy_retrom12256	mmuiretrom20493	NA	NA	NA	NA	NA
hsa_retrom25257	ptr_retrom11145	ggo_retrom01843	ppy_retrom10987	mmu_retrom10397	NA	NA	NA	NA	NA
hsa_retrop09820	ptr_retrom05948	ggo_retrop01847	ppy_retrop12234	mmu_retrop17936	NA	NA	NA	NA	NA
hsairetrop36593	ptriretrop23843	ggoiretrop20091	ppyiretrop27159	mmuiretrop23168	NA	NA	NA	NA	NA
hsa_retrom25250	ptriretrom42086	ggo_retrom01840	NA	NA	NA	NA	NA	NA	NA
hsa_retrop31264	ptr_retrop09606	ggo_retrop04223	ppy_retrop17325	mmu_retrop32912	NA	NA	NA	NA	NA
hsa_retrom25520	ptr_retrom11206	ggo_retrom01879	NA	NA	NA	NA	NA	NA	NA
hsa_retrop08663	ptriretrop17552	ggo_retrop02282	ppy_retrop10183	NA	NA	NA	NA	NA	NA
hsa_retrom15607	NA	ggo_retrom00701	ppy_retrom06870	mmu_retrom07595	NA	NA	NA	NA	NA
hsa_retrop16596	ptriretrop09558	ggoiretrom26138	NA	NA	NA	NA	NA	NA	NA
hsa_retrom14732	ptriretrom11880	ggo_retrom00866	ppy_retrom07432	mmu_retrom27703	NA	NA	NA	NA	NA
hsa_retrop08668	ptr_retrop05012	ggoiretrop17014	ppy_retrop10186	mmu_retrop15886	NA	NA	NA	NA	NA
hsairetrom32261	ptr_retrom08570	ggo_retrom03889	NA	mmu_retrop27600	NA	NA	NA	NA	NA
hsa_retrom25093	ptr_retrom11099	ggo_retrom01818	ppy_retrom10924	mmu_retrom10139	NA	NA	NA	NA	NA
hsa_retrom34710	ptriretrom30210	ggoiretrom29976	ppyiretrom32311	NA	NA	NA	NA	NA	NA
hsa_retrom10255	NA	ggo_retrom01282	ppy_retrom08961	mmu_retrom07848	NA	NA	NA	NA	NA
hsa_retrom34576	ptr_retrom08415	ggoiretrom28762	ppyiretrom32204	NA	NA	NA	NA	NA	NA
hsa_retrop29920	NA	ggoiretrop31645	ppy_retrop18082	mmu_retrom34267	NA	NA	NA	NA	NA
hsairetrom37693	ptr_retrom06515	ggo_retrom01688	ppy_retrom11504	mmu_retrop12982	NA	NA	NA	NA	NA
hsa_retrop08688	ptr_retrop05017	ggoiretrop16181	ppyiretrop19885	mmu_retrop15899	NA	NA	NA	NA	NA
hsa_retrop12616	ptr_retrop03660	ggo_retrop00919	ppy_retrop07851	NA	NA	NA	NA	NA	NA
hsa_retrom30637	ptriretrom35075	ggoiretrom32894	ppyiretrom36542	mmu_retrom32580	NA	NA	NA	NA	NA
hsa_retrop08685	ptriretrop17588	ggo_retrop02287	ppy_retrop10194	mmu_retrop15896	NA	NA	NA	NA	NA
hsa_retrom22084	ptr_retrom04073	ggo_retrom01363	NA	mmu_retrom17238	NA	NA	NA	NA	NA
hsa_retrop12213	NA	ggo_retrop00876	ppy_retrop07653	mmu_retrop29391	NA	NA	NA	NA	NA
hsa_retrop42029	ptr_retrop06117	ggo_retrop01576	ppy_retrop11834	mmu_retrom10970	NA	NA	NA	NA	NA
hsa_retrop14205	ptr_retrop03327	ggo_retrop00829	ppy_retrop07407	mmuiretrop26168	NA	NA	NA	NA	NA
hsa_retrop32850	ptr_retrom08832	ggo_retrom01149	NA	NA	NA	NA	NA	NA	NA
hsa_retrop01582	ptr_retrop10463	ggo_retrop04539	ppyiretrom41401	mmu_retrop38690	NA	NA	NA	NA	NA
hsa_retrop39665	ptr_retrop06510	ggoiretrop19615	ppyiretrop26965	NA	NA	NA	NA	NA	NA
hsa_retrop43494	ptr_retrop06901	ggoiretrop23557	ppy_retrop13675	NA	NA	NA	NA	NA	NA
hsa_retrom41545	ptriretrom25623	ggo_retrom02984	ppy_retrom13025	mmu_retrom23152	NA	NA	NA	NA	NA
hsa_retrop11323	ptr_retrop01598	ggo_retrop01198	ppy_retrop09226	mmu_retrop09387	NA	NA	NA	NA	NA
hsa_retrom37756	ptr_retrom06688	ggo_retrom02548	ppy_retrom12328	mmu_retrom20943	NA	NA	NA	NA	NA
hsa_retrop44171	ptriretrop26277	ggo_retrop02930	ppyiretrop29741	mmu_retrop24996	NA	NA	NA	NA	NA
hsa_retrom04018	ptriretrom18426	ggoiretrom21368	ppyiretrom20158	NA	NA	NA	NA	NA	NA
hsa_retrom00065	ptr_retrom09912	ggo_retrom04420	ppy_retrop19478	mmu_retrom36023	NA	NA	NA	NA	NA
hsa_retrom15048	ptr_retrom03193	ggo_retrom00608	ppy_retrom06667	NA	NA	NA	NA	NA	NA
hsa_retrop09623	ptr_retrop05527	ggo_retrop01817	ppyiretrop24958	mmu_retrop17802	NA	NA	NA	NA	NA
hsa_retrop13991	ptr_retrop03287	ggo_retrop00805	ppy_retrop07340	mmu_retrop28777	NA	NA	NA	NA	NA
hsa_retrom40717	ptr_retrom06911	ggoiretrom22439	ppyiretrom27409	NA	NA	NA	NA	NA	NA
hsa_retrom10036	ptr_retrom04336	ggo_retrom01247	ppy_retrom08878	NA	NA	NA	NA	NA	NA
hsa_retrom37752	ptr_retrom06684	ggo_retrom02545	ppy_retrom12322	mmu_retrom20933	NA	NA	NA	NA	NA
hsa_retrom41627	ptr_retrom07077	ggo_retrom03000	ppy_retrom13057	NA	NA	NA	NA	NA	NA
hsa_retrom30127	ptr_retrom09260	NA	ppy_retrom16234	mmu_retrom32204	mus_retrop96975	rnoiretrop45383	mdo_retrom08393	NA	gga_retrop28515
hsa_retrop01451	ptriretrop39288	ggoiretrop35680	ppy_retrom18306	mmuiretrop38520	NA	NA	NA	NA	NA
hsa_retrom30120	ptriretrom34411	ggo_retrom04310	ppy_retrom16229	NA	NA	NA	NA	NA	NA
hsa_retrop42817	ptr_retrop06797	ggo_retrop02761	NA	mmu_retrop23744	NA	NA	NA	NA	NA
hsa_retrom40087	ptr_retrom06423	ggo_retrom01648	ppy_retrom11391	mmu_retrom11862	NA	NA	NA	NA	NA
hsa_retrom40082	ptr_retrom06421	ggo_retrom01647	ppy_retrom11381	NA	NA	NA	NA	NA	NA
hsa_retrom31654	ptr_retrop08690	ggo_retrom03531	ppy_retrom15701	mmu_retrom30691	NA	NA	NA	NA	NA
hsa_retrop27653	ptriretrop04970	ggoiretrop00652	ppyiretrop05599	NA	NA	NA	NA	NA	NA
hsa_retrop43638	ptr_retrop06928	ggo_retrop02848	ppy_retrop13726	mmu_retrop24404	NA	NA	NA	NA	NA
hsa_retrop38741	ptr_retrop07460	ggo_retrop03201	ppy_retrop14634	mmu_retrop37288	mus_retrop74711	rnoiretrop39111	mdo_retrop12081	oaniretrop11805	ggairetrop06785
hsa_retrop08531	ptr_retrop04984	ggo_retrop02261	NA	NA	NA	NA	NA	NA	NA
hsa_retrom30705	ptriretrom31416	ggoiretrop08545	ppy_retrom15440	NA	NA	NA	NA	NA	NA
hsa_retrom34887	ptr_retrom08481	ggo_retrom03831	ppy_retrom15174	mmuiretrom22545	NA	NA	NA	NA	NA
hsa_retrop21189	ptr_retrop02491	NA	ppy_retrop04853	mmu_retrop06538	NA	NA	NA	NA	NA
hsa_retrom30251	ptr_retrom09295	ggo_retrom04329	NA	NA	NA	NA	NA	NA	NA
hsa_retrom14185	ptriretrom10999	ggo_retrom00756	ppyiretrom12923	mmu_retrom26964	musiretrom38462	rnoiretrom36039	mdo_retrom27468	oaniretrop06229	ggairetrom03548
hsa_retrom35375	ptriretrom31239	ggo_retrom03909	ppy_retrom15395	mmu_retrop27498	NA	NA	NA	NA	NA
hsa_retrop15483	NA	ggo_retrop00672	ppy_retrop06824	mmu_retrop09087	NA	NA	NA	NA	NA
hsa_retrop25874	ptr_retrop01800	ggo_retrop00022	ppy_retrop03091	NA	NA	NA	NA	NA	NA
hsa_retrom11296	ptriretrom12526	ggoiretrom06698	ppyiretrom14325	mmuiretrom25211	NA	NA	NA	NA	NA
hsa_retrom11294	ptr_retrom03724	ggo_retrom00932	ppy_retrom07654	mmu_retrom28699	NA	NA	NA	NA	NA
hsa_retrom35765	ptr_retrom07396	ggo_retrom03169	ppy_retrop14384	mmu_retrop36640	NA	NA	NA	NA	NA
hsa_retrom04302	ptr_retrom05514	ggo_retrom02761	ppy_retrom10419	mmu_retrom14789	NA	NA	NA	NA	NA
hsa_retrom38135	ptr_retrom06798	ggoiretrom19147	ppy_retrom12472	mmu_retrom21237	NA	NA	NA	NA	NA
hsa_retrop05332	ptr_retrop05289	ggo_retrop02607	ppy_retrom10550	mmu_retrom15090	NA	NA	NA	NA	NA
hsa_retrom16417	ptr_retrop02731	ggo_retrop03371	ppy_retrop06271	mmu_retrom06583	NA	NA	NA	NA	NA
hsa_retrop08916	ptriretrop17883	ggoiretrop17076	ppy_retrop10278	mmuiretrop14882	NA	NA	NA	NA	NA
hsa_retrop11436	ptr_retrop04117	ggo_retrop01212	NA	mmu_retrop09478	NA	NA	NA	NA	NA
hsa_retrom29222	ptr_retrom09854	ggo_retrom04159	ppyiretrom38756	mmu_retrop34979	NA	NA	NA	NA	NA
hsa_retrop05338	ptr_retrop05291	ggo_retrop02608	ppy_retrom10533	mmu_retrom15078	NA	NA	NA	NA	NA
hsa_retrop24057	NA	ggo_retrop01383	ppy_retrop08218	mmu_retrop20284	NA	NA	NA	NA	NA
hsa_retrom35792	ptriretrom27091	NA	ppyiretrop30786	mmuiretrop35585	NA	NA	NA	NA	NA
hsa_retrop24698	ptr_retrop11490	ggo_retrop01680	ppy_retrop10987	mmu_retrop12299	NA	NA	NA	NA	NA
hsa_retrop38695	ptr_retrop07442	ggo_retrop03184	ppy_retrop14590	mmu_retrop37252	NA	NA	NA	NA	NA
hsa_retrom31720	ptr_retrom08921	ggo_retrom03542	ppy_retrom15723	mmu_retrom30776	NA	NA	NA	NA	NA
hsa_retrom10100	ptr_retrom04352	ggo_retrom01259	ppy_retrom08898	mmu_retrom07718	NA	NA	NA	NA	NA
hsa_retrom05492	ptr_retrom04567	ggo_retrom02133	ppy_retrop10058	NA	NA	NA	NA	NA	NA
hsa_retrom31897	ptr_retrom08945	ggo_retrom03558	ppy_retrom15759	mmu_retrom30889	NA	NA	NA	NA	NA
hsa_retrop28005	ptriretrop35998	ggoiretrop32908	ppy_retrom17013	NA	NA	NA	NA	NA	NA
hsa_retrop43330	ptriretrop25346	ggo_retrop02805	ppyiretrop28776	NA	NA	NA	NA	NA	NA
hsa_retrom00680	ptr_retrom09972	ggoiretrom34651	ppy_retrop19307	NA	NA	NA	NA	NA	NA
hsa_retrop28347	ptr_retrop09897	ggoiretrop32691	ppy_retrom16909	mmuiretrom32224	NA	NA	NA	NA	NA
hsa_retrop01117	ptr_retrop10411	ggo_retrop04501	NA	mmu_retrom36606	NA	NA	NA	NA	NA
hsa_retrom36366	ptr_retrom07584	ggo_retrom03289	ppy_retrom13502	mmu_retrom34759	NA	NA	NA	NA	NA
hsa_retrom35116	ptriretrom30841	ggo_retrom03870	NA	NA	NA	NA	NA	NA	NA
hsa_retrom30410	ptr_retrom09333	ggoiretrom32382	ppy_retrom16289	mmu_retrom32405	NA	NA	NA	NA	NA
hsa_retrop10698	ptr_retrop05722	ggo_retrop01978	ppy_retrop12590	mmu_retrop18759	NA	NA	NA	NA	NA
hsa_retrom30415	ptr_retrom09337	ggo_retrom04354	ppy_retrom16292	mmuiretrom28981	NA	NA	NA	NA	NA
hsa_retrom34977	ptr_retrom08505	ggo_retrom03846	ppy_retrom15215	mmu_retrop27974	NA	NA	NA	NA	NA
hsa_retrop06597	ptriretrop16360	ggo_retrop02089	NA	NA	mus_retrop89795	NA	NA	NA	NA
hsairetrop15867	ptr_retrom03065	ggo_retrom03517	ppyiretrop10498	mmuiretrop06907	NA	NA	NA	NA	NA
hsa_retrom29595	ptr_retrom09129	ggo_retrom04217	ppyiretrom35296	mmu_retrom31664	NA	NA	NA	NA	NA
hsa_retrom04941	NA	ggoiretrom21172	ppyiretrom21144	mmuiretrom16318	NA	NA	NA	NA	NA
hsa_retrop05245	ptr_retrop05274	ggoiretrop21433	ppy_retrom10569	NA	NA	NA	NA	NA	NA
hsa_retrom03265	ptr_retrom10635	ggo_retrom04766	ppyiretrop40955	mmu_retrop39568	NA	NA	NA	NA	NA
hsa_retrom16561	ptriretrom09365	ggoiretrop26416	ppy_retrom01828	NA	NA	NA	NA	NA	NA
hsa_retrom28484	ptr_retrom09623	ggo_retrom04049	NA	mmu_retrom32766	NA	NA	NA	NA	NA
hsa_retrom29351	ptr_retrom09890	ggo_retrom04187	NA	NA	NA	NA	NA	NA	NA
hsairetrop28362	ptriretrop35131	ggo_retrop04315	ppy_retrop17499	mmu_retrop33320	NA	NA	NA	NA	NA
hsa_retrom11346	ptr_retrom03737	ggoiretrom07205	ppy_retrom07686	mmu_retrom28793	NA	NA	NA	NA	NA
hsa_retrom11340	ptr_retrom03732	ggo_retrom00939	ppyiretrom14386	mmu_retrom28778	NA	NA	NA	NA	NA
hsa_retrom11343	ptr_retrom03735	ggo_retrom00941	ppy_retrom07682	mmu_retrom28785	NA	NA	NA	NA	NA
hsa_retrom16349	ptriretrop08862	ggoiretrop25872	ppyiretrop11063	mmuiretrom05556	NA	NA	NA	NA	NA
hsa_retrom36825	ptr_retrom07664	ggo_retrom03348	ppy_retrom13989	mmuiretrom33844	NA	NA	NA	NA	NA
hsa_retrom42713	ptr_retrom07284	ggo_retrom03118	ppy_retrom13417	mmu_retrom24059	NA	NA	NA	NA	NA
hsa_retrop25253	ptr_retrop01995	ggoiretrop02947	ppy_retrop04976	mmu_retrop10222	NA	NA	NA	NA	NA
hsa_retrom31273	ptr_retrop08766	ggo_retrop01110	ppy_retrom15597	mmu_retrom30307	mus_retrop53005	rnoiretrop42749	mdo_retrom17040	NA	NA
hsairetrom28622	ptriretrop32553	ggo_retrop01124	NA	mmu_retrom30047	NA	NA	NA	NA	NA
hsa_retrom29571	ptr_retrom09127	ggo_retrom04214	ppy_retrom16042	mmu_retrom31655	NA	NA	NA	NA	NA
hsa_retrop17277	ptr_retrop02599	NA	ppy_retrop07056	mmu_retrop07007	NA	NA	NA	NA	NA
hsa_retrop21769	ptr_retrop03883	ggo_retrop01296	ppy_retrom08707	mmu_retrop19359	NA	NA	NA	NA	NA
hsairetrop35114	ptriretrop27961	ggo_retrop03158	ppyiretrop31240	mmuiretrop36410	NA	NA	NA	NA	NA
hsa_retrop10588	ptr_retrop05691	ggoiretrop14645	ppyiretrop26054	mmuiretrop19083	NA	NA	NA	NA	NA
hsa_retrop10584	ptr_retrop05690	ggo_retrop01957	ppy_retrop12545	mmu_retrop18684	NA	NA	NA	NA	NA
hsa_retrom35024	ptr_retrom08515	ggo_retrom03850	ppy_retrom15239	mmu_retrop27900	NA	NA	NA	NA	NA
hsa_retrom35020	ptr_retrom08514	ggo_retrom03849	ppy_retrom15227	mmu_retrop27934	NA	NA	NA	NA	NA
hsairetrop40884	ptriretrop26091	ggo_retrop02909	ppyiretrop29562	NA	NA	NA	NA	NA	NA
hsa_retrop34750	ptr_retrop09508	NA	ppyiretrop36922	mmu_retrop32652	NA	NA	NA	NA	NA
hsa_retrom42398	ptr_retrom07232	ggo_retrom03088	ppy_retrom13327	mmu_retrom23899	NA	NA	NA	NA	NA
hsa_retrop17471	ptriretrop06194	NA	ppyiretrop06338	mmu_retrop03910	NA	NA	NA	NA	NA
hsairetrop20350	ptriretrop14352	ggoiretrop10536	ppy_retrom08666	mmu_retrop19586	NA	NA	NA	NA	NA
hsa_retrom35593	ptriretrom26788	ggoiretrom23985	ppyiretrop31051	mmuiretrop35638	NA	NA	NA	NA	NA
hsa_retrop21162	ptr_retrop02489	ggo_retrop00380	ppy_retrop04834	mmuiretrop03712	NA	NA	NA	NA	NA
hsa_retrop03980	ptr_retrop10888	ggo_retrop04784	ppy_retrom17669	mmu_retrom37870	NA	NA	NA	NA	NA
hsa_retrom00848	ptr_retrom10029	ggo_retrom04502	ppy_retrop19236	NA	NA	NA	NA	NA	NA
hsa_retrop11610	ptriretrop15557	ggo_retrop01228	ppy_retrop09327	mmu_retrop09661	NA	NA	NA	NA	NA
hsa_retrom16984	ptriretrom07968	ggo_retrom00503	ppy_retrom06985	mmu_retrom05573	NA	NA	NA	NA	NA
hsa_retrom03649	ptr_retrom10768	ggo_retrom04842	ppy_retrop18359	mmu_retrop40354	NA	NA	NA	NA	NA
hsa_retrom32714	ptr_retrom07766	ggo_retrom03658	ppy_retrom14148	NA	NA	NA	NA	NA	NA
hsa_retrop36320	ptr_retrop08380	NA	ppy_retrop16002	mmu_retrop26663	NA	NA	NA	NA	NA
hsa_retrom34948	ptriretrom30536	ggoiretrom30005	ppyiretrom32593	mmuiretrom22559	NA	NA	NA	NA	NA
hsa_retrom40776	ptriretrom24988	ggoiretrom22447	ppy_retrom12767	mmu_retrom22479	NA	NA	NA	NA	NA
hsa_retrom35490	ptr_retrom08631	ggoiretrom29239	ppy_retrom15434	mmu_retrom26844	NA	NA	NA	NA	NA
hsa_retrom41371	ptr_retrom07029	ggoiretrom22061	ppyiretrom28037	mmu_retrom23072	NA	NA	NA	NA	NA
hsa_retrop38183	ptr_retrop07360	ggo_retrop03127	ppy_retrom13576	NA	NA	NA	NA	NA	NA
hsairetrop40087	ptriretrop25370	ggoiretrop22768	NA	NA	NA	NA	NA	NA	NA
hsa_retrom35956	NA	ggoiretrom24460	ppyiretrop30617	mmuiretrop35549	NA	NA	NA	NA	NA
hsa_retrom37994	ptr_retrom06747	ggo_retrom02590	ppy_retrom12414	mmu_retrom21166	NA	NA	NA	NA	NA
hsairetrop40082	ptriretrop25365	ggoiretrop23541	NA	NA	NA	NA	NA	NA	NA
hsa_retrom36132	ptr_retrom07505	ggo_retrom03251	NA	NA	NA	NA	NA	NA	NA
hsa_retrom38434	ptr_retrom06858	ggo_retrom02687	ppy_retrom12568	mmu_retrom21419	NA	NA	NA	NA	NA
hsa_retrop38665	ptriretrop28100	ggo_retrop03178	ppy_retrop14571	mmu_retrop37132	NA	NA	NA	NA	NA
hsa_retrop40731	ptriretrop21815	ggoiretrop12405	ppy_retrom11191	NA	NA	NA	NA	NA	NA
hsa_retrop10475	ptr_retrop05663	ggo_retrop01938	ppy_retrop12501	NA	NA	NA	NA	NA	NA
hsa_retrom09672	ptr_retrom06036	ggo_retrom02054	NA	NA	NA	NA	NA	NA	NA
hsa_retrom09677	ptr_retrom06037	ggo_retrop01963	ppy_retrom12121	mmu_retrom16723	NA	NA	NA	NA	NA
hsa_retrop12567	ptriretrop12786	ggo_retrop00917	ppy_retrop07834	mmu_retrop29744	NA	NA	NA	NA	NA
hsa_retrom37840	ptriretrom23766	NA	ppyiretrom26265	mmuiretrom20592	NA	NA	NA	NA	NA
hsa_retrop12562	ptr_retrop03650	ggoiretrop07571	ppy_retrop07822	mmu_retrop29705	NA	NA	NA	NA	NA
hsa_retrom09458	ptr_retrop05544	ggo_retrom02014	ppy_retrom12053	NA	NA	NA	NA	NA	NA
hsa_retrom09105	ptr_retrop05603	ggo_retrom01971	ppy_retrom11956	NA	NA	NA	NA	NA	NA
hsa_retrom31920	ptriretrom32643	ggoiretrom26356	ppyiretrom34315	mmuiretrom28361	NA	NA	NA	NA	NA
hsa_retrom28420	NA	ggo_retrom04041	ppy_retrop17784	mmu_retrom32702	NA	NA	NA	NA	NA
hsa_retrom31921	NA	ggo_retrom03562	ppy_retrom15776	mmu_retrom30934	NA	NA	NA	NA	NA
hsa_retrom09456	ptriretrop20113	ggoiretrom15261	ppyiretrom25051	mmu_retrom16368	NA	NA	NA	NA	NA
hsa_retrop28093	ptr_retrop09859	ggo_retrop03936	ppy_retrom16993	NA	NA	NA	NA	NA	NA
hsa_retrop12744	ptriretrop12997	ggo_retrop00932	ppy_retrop07880	mmu_retrop29910	NA	NA	NA	NA	NA
hsa_retrop36901	ptr_retrop08527	ggo_retrop03819	ppy_retrop16234	mmu_retrop27355	NA	NA	NA	NA	NA
hsa_retrop32909	ptriretrom31841	ggo_retrom01136	ppyiretrop35433	mmuiretrop29256	NA	NA	NA	NA	NA
hsa_retrom37669	ptr_retrom06670	ggo_retrom02535	NA	mmu_retrom20813	NA	NA	NA	NA	NA
hsa_retrop37278	ptriretrop31607	ggo_retrop03887	ppyiretrop34625	NA	NA	NA	NA	NA	NA
hsa_retrop32900	ptr_retrom08824	ggo_retrom01139	ppy_retrop16680	mmu_retrop31008	NA	NA	NA	NA	NA
hsa_retrop10363	ptr_retrom05821	ggoiretrop14594	ppy_retrop12462	mmu_retrop18363	NA	NA	NA	NA	NA
hsa_retrom08853	ptr_retrom05794	ggo_retrom01942	ppy_retrom11862	mmu_retrom15869	NA	NA	NA	NA	NA
hsairetrom34978	ptriretrom23375	ggo_retrom02527	ppy_retrom12282	NA	NA	NA	NA	NA	NA
hsa_retrom08856	NA	ggoiretrom14974	ppyiretrom24418	mmuiretrom16966	NA	NA	NA	NA	NA
hsa_retrop36904	ptr_retrop08529	ggo_retrop03820	ppy_retrop16235	NA	NA	NA	NA	NA	NA
hsa_retrop13589	ptr_retrop03199	ggo_retrop00733	ppy_retrop07174	mmu_retrop28267	NA	NA	NA	NA	NA
hsa_retrom36227	ptriretrom27816	ggo_retrom03272	ppy_retrop14499	mmuiretrop35665	NA	NA	NA	NA	NA
hsa_retrom09587	ptr_retrom06017	ggo_retrom02040	ppy_retrom12103	mmuiretrom17175	NA	NA	NA	NA	NA
hsa_retrom32016	ptr_retrom08963	ggoiretrom27200	ppyiretrom34410	mmu_retrom30978	NA	NA	NA	NA	NA
hsairetrop10816	ptriretrop03508	ggo_retrop01197	NA	mmuiretrop09021	NA	NA	NA	NA	NA
hsa_retrop24507	ptriretrop42494	ggoiretrop12568	ppyiretrop21939	mmu_retrop11989	NA	NA	NA	NA	NA
hsa_retrop40428	NA	ggo_retrop02519	ppyiretrop27893	mmu_retrop23088	NA	NA	NA	NA	NA
hsa_retrop12694	ptr_retrop03682	ggo_retrop00923	ppy_retrop07869	mmu_retrop29844	NA	NA	NA	NA	NA
hsa_retrom09076	ptr_retrop05605	ggo_retrom01969	NA	mmu_retrom16057	NA	NA	NA	NA	NA
hsa_retrop21883	ptr_retrop03904	ggo_retrop01313	ppy_retrom08648	NA	NA	NA	NA	NA	NA
hsa_retrop14590	ptr_retrop02973	ggo_retrop00582	ppy_retrop06561	NA	NA	NA	NA	NA	NA
hsa_retrom29918	ptriretrop34526	ggo_retrom04282	ppy_retrom16174	mmuiretrop30941	NA	NA	NA	NA	NA
hsa_retrom29917	ptriretrop34535	ggo_retrom04281	ppy_retrom16173	NA	NA	NA	NA	NA	NA
hsa_retrom29914	ptriretrop34544	ggoiretrom33143	ppyiretrom35720	NA	NA	NA	NA	NA	NA
hsa_retrom09188	ptriretrop20395	NA	ppyiretrom24731	mmu_retrom16147	NA	NA	NA	NA	NA
hsa_retrom29912	ptr_retrop09621	ggo_retrom04279	ppy_retrom16170	mmu_retrop32945	NA	NA	NA	NA	NA
hsairetrom08378	ptr_retrom05672	ggo_retrom01902	ppy_retrom11653	mmu_retrom15671	NA	NA	NA	NA	NA
hsa_retrom02918	ptr_retrom10530	ggo_retrom04703	ppy_retrop18672	mmu_retrom38427	NA	NA	NA	NA	NA
hsa_retrop08896	NA	ggo_retrop02318	ppy_retrop10270	mmu_retrop16086	NA	NA	NA	NA	NA
hsa_retrom37066	ptr_retrom07668	ggoiretrom24653	ppy_retrom14005	NA	NA	NA	NA	NA	NA
hsa_retrom05010	ptr_retrom05636	ggo_retrom02861	ppy_retrom10673	mmu_retrom15502	NA	NA	NA	NA	NA
hsa_retrom05013	ptr_retrom05638	ggo_retrom02862	ppy_retrom10675	NA	NA	NA	NA	NA	NA
hsa_retrom36819	ptr_retrom07662	ggo_retrom03347	ppyiretrom30800	mmu_retrom35772	NA	NA	NA	NA	NA
hsa_retrom22499	ptr_retrom04170	ggo_retrom01442	ppy_retrop08909	NA	NA	NA	NA	NA	NA
hsa_retrom37265	ptr_retrom06627	NA	ppyiretrom25768	mmu_retrom20734	NA	NA	NA	NA	NA
hsa_retrop16537	ptr_retrop02843	ggoiretrom25879	NA	mmu_retrop07845	NA	NA	NA	NA	NA
hsa_retrop05816	ptr_retrop05405	ggoiretrop20659	NA	NA	NA	NA	NA	NA	NA
hsa_retrom39387	ptriretrom22182	ggo_retrom01593	NA	NA	NA	NA	NA	NA	NA
hsa_retrom14043	ptriretrom10882	ggoiretrom05275	ppyiretrom12791	NA	NA	NA	NA	NA	NA
hsa_retrom24884	ptr_retrom11051	ggo_retrom01792	ppy_retrom10858	mmu_retrom09798	NA	NA	NA	NA	NA
hsa_retrop21972	ptr_retrop03911	ggo_retrop01319	ppy_retrom08618	NA	mus_retrom79661	rno_retrom05928	NA	NA	NA
hsa_retrop32583	ptr_retrom08893	ggo_retrom01199	ppy_retrop16550	mmu_retrop30576	NA	NA	NA	NA	NA
hsa_retrom32658	ptr_retrom07752	ggo_retrom03646	ppyiretrom31124	mmu_retrom24277	NA	NA	NA	NA	NA
hsa_retrom06218	ptr_retrom04930	NA	ppy_retrop09680	mmuiretrop14624	NA	NA	NA	NA	NA
hsa_retrop31583	ptr_retrom09146	ggo_retrop04291	ppy_retrop17437	mmu_retrom31706	NA	NA	NA	NA	NA
hsa_retrom40522	ptriretrom23018	ggo_retrom01709	NA	mmu_retrop12841	NA	NA	NA	NA	NA
hsa_retrop40951	ptr_retrop05946	ggo_retrop01478	ppy_retrom11135	mmu_retrom11374	mus_retrop93743	rnoiretrop36471	mdo_retrop05443	NA	NA
hsairetrop28962	ptriretrop35828	ggoiretrop33464	ppy_retrop17664	mmuiretrop31255	NA	NA	NA	NA	NA
hsa_retrom22303	ptriretrom14114	ggo_retrom01407	ppyiretrop16820	mmu_retrom17570	NA	NA	NA	NA	NA
hsa_retrop16458	ptriretrom08558	ggoiretrom26182	ppyiretrop03330	mmu_retrop08177	NA	NA	NA	NA	NA
hsa_retrom42567	ptriretrom26464	ggoiretrom22740	ppy_retrom13376	NA	NA	NA	NA	NA	NA
hsa_retrop13977	ptr_retrop03281	ggo_retrop00797	NA	mmu_retrop28717	NA	NA	NA	NA	NA
hsa_retrom08508	ptr_retrom05401	ggo_retrom02480	ppyiretrom20058	mmu_retrom14372	NA	NA	NA	NA	NA
hsa_retrop36999	ptr_retrop08559	ggo_retrop03841	ppyiretrop34183	mmu_retrom26724	NA	NA	NA	NA	NA
hsa_retrom27315	ptr_retrom09404	ggo_retrom03939	ppy_retrop17848	mmu_retrop34251	NA	NA	NA	NA	NA
hsa_retrop22051	ptr_retrop03939	ggoiretrop10245	ppy_retrom08552	mmu_retrop19882	NA	NA	NA	NA	NA
hsairetrom25965	ptriretrom36689	ggo_retrom04102	ppyiretrom38283	mmuiretrop33912	NA	NA	NA	NA	NA
hsa_retrom25793	ptr_retrom02083	ggo_retrom00371	NA	NA	NA	NA	NA	NA	NA
hsa_retrom25795	ptr_retrom02085	ggo_retrom00373	ppy_retrom04985	NA	NA	NA	NA	NA	NA
hsa_retrom25798	ptriretrom05472	ggo_retrom00374	ppyiretrom07736	NA	mus_retrom123148	NA	NA	NA	NA
hsa_retrom25799	ptr_retrom02086	ggo_retrom00376	ppy_retrom04990	mmu_retrom08970	NA	NA	NA	NA	NA
hsa_retrom14120	ptr_retrom03387	ggoiretrom05286	ppy_retrom07154	mmu_retrom26912	NA	NA	NA	NA	NA
hsa_retrop43428	ptr_retrop06885	ggoiretrop22167	ppy_retrop13660	NA	NA	NA	NA	NA	NA
hsa_retrom38571	ptr_retrom06895	ggo_retrom02714	NA	mmuiretrom20773	NA	NA	NA	NA	NA
hsa_retrom25882	ptr_retrom02111	ggo_retrom00401	ppy_retrom05049	NA	NA	NA	NA	NA	NA
hsa_retrop42608	ptr_retrop06728	ggo_retrop02725	NA	mmu_retrop23550	NA	NA	NA	NA	NA
hsa_retrop33366	ptriretrop33103	ggoiretrop27362	NA	mmu_retrop31604	NA	NA	NA	NA	NA
hsa_retrop32769	ptr_retrom08837	ggoiretrom08304	ppyiretrop35295	NA	NA	NA	NA	NA	NA
hsa_retrop00468	ptr_retrop10345	ggo_retrop04466	ppy_retrom18571	mmu_retrop38091	NA	NA	NA	NA	NA
hsa_retrop39904	ptriretrop24015	ggo_retrop02464	ppyiretrop27335	NA	NA	NA	NA	NA	NA
hsairetrom39977	ptr_retrom07269	ggo_retrom03113	ppy_retrom13392	NA	NA	NA	NA	NA	NA
hsa_retrom01109	ptr_retrom10115	ggo_retrom04539	ppy_retrop19114	mmu_retrom36762	NA	NA	NA	NA	NA
hsa_retrop32014	ptriretrop35409	NA	ppyiretrop38116	mmuiretrop31465	NA	NA	NA	NA	NA
hsa_retrom01106	ptr_retrom10114	ggo_retrom04538	ppy_retrop19117	mmu_retrom36761	NA	NA	NA	NA	NA
hsa_retrop32017	ptr_retrop09753	ggoiretrop33222	ppy_retrop17582	mmuiretrop31021	NA	NA	NA	NA	NA
hsa_retrop05104	ptriretrop18583	ggo_retrop02583	NA	NA	NA	NA	NA	NA	NA
hsa_retrop32011	ptr_retrop09749	ggo_retrop04354	NA	NA	NA	NA	NA	NA	NA
hsa_retrop31295	ptr_retrop09617	ggoiretrop33550	NA	NA	NA	NA	NA	NA	NA
hsa_retrop10875	ptr_retrop05763	ggo_retrop02004	NA	NA	NA	NA	NA	NA	NA
hsa_retrop10873	ptr_retrop05761	NA	ppy_retrop12646	mmu_retrop18840	NA	NA	NA	NA	NA
hsa_retrop24914	ptr_retrop11527	ggoiretrop13005	NA	NA	NA	NA	NA	NA	NA
hsa_retrom04160	ptr_retrom05484	ggo_retrom02747	ppy_retrom10388	mmu_retrom14682	NA	NA	NA	NA	NA
hsa_retrom25241	ptr_retrom11141	ggo_retrom01838	ppy_retrom10982	mmu_retrom10354	NA	NA	NA	NA	NA
hsa_retrom29816	ptr_retrop09643	ggo_retrom04259	ppy_retrom16126	mmu_retrop33077	NA	NA	NA	NA	NA
hsa_retrom25244	NA	ggo_retrom01839	ppyiretrom22219	mmu_retrom10383	NA	NA	NA	NA	NA
hsa_retrop31458	ptr_retrom09175	ggoiretrop33583	ppy_retrop17379	mmu_retrop33105	NA	NA	NA	NA	NA
hsa_retrop11059	ptr_retrop04047	ggo_retrop01162	ppy_retrop09135	NA	NA	NA	NA	NA	NA
hsa_retrom39398	ptriretrom22193	ggoiretrom11776	ppyiretrop23176	NA	NA	NA	NA	NA	NA
hsa_retrom29640	ptr_retrom09140	ggoiretrom32657	ppy_retrom16057	mmu_retrom31679	NA	NA	NA	NA	NA
hsa_retrop11053	ptriretrop15004	ggo_retrop01161	NA	NA	NA	NA	NA	NA	NA
hsa_retrom04761	ptr_retrom05570	ggoiretrom21125	NA	mmu_retrop16826	NA	NA	NA	NA	NA
hsa_retrom10241	ptr_retrom01619	ggo_retrom01280	ppy_retrom08958	mmu_retrom07842	NA	NA	NA	NA	NA
hsa_retrom25103	ptr_retrom11105	ggo_retrom01821	ppy_retrom10934	NA	NA	NA	NA	NA	NA
hsa_retrom14232	ptr_retrom03410	ggo_retrom00764	ppy_retrom07207	mmu_retrom26994	NA	NA	NA	NA	NA
hsa_retrom14230	ptr_retrom03408	ggoiretrom05660	ppy_retrom07206	mmu_retrom26991	NA	NA	NA	NA	NA
hsa_retrom38474	ptr_retrom06870	ggo_retrom02697	ppy_retrom12589	mmu_retrom21498	NA	NA	NA	NA	NA
hsa_retrom19159	ptr_retrom02540	ggoiretrom01750	ppyiretrom06740	mmu_retrom04085	NA	NA	NA	NA	NA
hsa_retrom34508	ptr_retrom08385	ggo_retrom03773	ppyiretrom32085	mmu_retrom25896	NA	NA	NA	NA	NA
hsa_retrop21751	ptr_retrop03880	NA	ppy_retrom08717	mmu_retrop19335	NA	NA	NA	NA	NA
hsairetrom32852	ptriretrom26927	ggoiretrom25117	NA	NA	NA	NA	NA	NA	NA
hsa_retrop36464	ptr_retrop08396	ggo_retrop03743	NA	NA	NA	NA	NA	NA	NA
hsa_retrop39610	ptr_retrop06489	ggo_retrop02408	ppy_retrop12789	mmu_retrop22359	NA	NA	NA	NA	NA
hsa_retrom29084	ptr_retrom09819	ggo_retrom04151	ppy_retrom17205	mmu_retrop35115	NA	NA	NA	NA	NA
hsa_retrop14215	ptriretrop11925	ggo_retrop00833	ppy_retrop07411	mmuiretrop27789	NA	NA	NA	NA	NA
hsa_retrom00070	ptriretrom37568	ggo_retrom04422	NA	mmu_retrom36041	NA	NA	NA	NA	NA
hsa_retrop43619	ptriretrop25610	ggo_retrop02843	ppy_retrop13717	NA	mus_retrom106904	NA	NA	NA	NA
hsa_retrom35703	ptr_retrom07379	ggo_retrom03163	ppy_retrop14427	mmu_retrop36686	NA	NA	NA	NA	NA
hsa_retrop04204	ptr_retrop10966	ggo_retrop04824	ppy_retrom17567	NA	NA	NA	NA	NA	NA
hsa_retrop09630	ptr_retrop05528	ggo_retrop01818	ppy_retrop12167	mmu_retrop17804	NA	NA	NA	NA	NA
hsa_retrop36662	ptr_retrop08446	ggo_retrop03786	NA	NA	NA	NA	NA	NA	NA
hsa_retrop04202	ptriretrop41826	ggo_retrop04822	ppy_retrom17569	mmu_retrom38839	NA	NA	NA	NA	NA
hsa_retrom16869	ptriretrop07733	ggo_retrom00489	NA	mmu_retrop06578	NA	NA	NA	NA	NA
hsa_retrom10023	ptr_retrom04331	ggo_retrom01246	ppy_retrom08868	NA	NA	NA	NA	NA	NA
hsa_retrom28953	ptriretrom36929	ggo_retrom04128	NA	NA	NA	NA	NA	NA	NA
hsa_retrom35468	ptr_retrom08628	ggo_retrom03934	ppy_retrom15426	NA	NA	NA	NA	NA	NA
hsa_retrop15181	ptr_retrop03064	ggo_retrop00629	ppy_retrop06646	mmu_retrop08768	mus_retrop74286	rno_retrom00423	NA	NA	ggairetrom02121
hsa_retrop15180	ptriretrop10446	NA	ppyiretrop11877	mmuiretrop07878	NA	NA	NA	NA	NA
hsa_retrom32665	ptr_retrom07754	ggo_retrom03647	ppy_retrom14127	mmu_retrom24287	NA	NA	NA	NA	NA
hsairetrom24724	ptriretrom35318	NA	ppy_retrop18047	mmu_retrom34335	NA	NA	NA	NA	NA
hsa_retrom30136	ptriretrom34442	NA	ppy_retrom16236	mmu_retrom32210	NA	NA	NA	NA	NA
hsa_retrop43829	ptr_retrop06968	ggo_retrop02876	ppy_retrop13793	mmu_retrop24621	mus_retrop101570	rnoiretrop30697	NA	NA	NA
hsa_retrop03796	ptriretrop41252	ggoiretrop34951	ppy_retrom17731	mmu_retrom38147	NA	NA	NA	NA	NA
hsa_retrom30139	ptr_retrom09262	ggoiretrom32792	ppy_retrom16237	NA	NA	NA	NA	NA	NA
hsa_retrop14183	ptr_retrop03320	ggo_retrop00822	NA	mmuiretrop26601	NA	NA	NA	NA	NA
hsa_retrom40094	NA	ggo_retrom01649	ppy_retrom11393	mmu_retrom11863	NA	NA	NA	NA	NA
hsa_retrop39739	ptr_retrop06540	ggo_retrop02434	ppy_retrop12836	NA	NA	NA	NA	NA	NA
hsa_retrop37735	ptr_retrop07234	ggo_retrop03017	ppy_retrom13793	mmu_retrom35261	NA	NA	NA	NA	NA
hsa_retrop08542	ptr_retrop04985	ggo_retrop02262	ppy_retrop10121	mmu_retrop15733	NA	NA	NA	NA	NA
hsa_retrom30155	ptriretrom34463	ggo_retrom04314	NA	NA	NA	NA	NA	NA	NA
hsa_retrop31358	ptr_retrom09197	ggo_retrop04244	NA	mmu_retrom31956	NA	NA	NA	NA	NA
hsa_retrom31666	ptriretrop32005	ggo_retrom03534	ppy_retrom15705	mmu_retrom30703	NA	NA	NA	NA	NA
hsa_retrom30245	ptr_retrom09293	ggoiretrom32811	ppyiretrom36107	mmuiretrom30101	NA	NA	NA	NA	NA
hsa_retrop43602	ptr_retrop06918	ggo_retrop02839	ppy_retrop13710	mmu_retrop24374	NA	NA	NA	NA	NA
hsa_retrop28224	ptriretrop36188	ggo_retrop03946	NA	mmu_retrop35820	NA	NA	NA	NA	NA
hsa_retrom39413	ptr_retrom06317	ggo_retrom01597	NA	mmu_retrop13280	NA	NA	NA	NA	NA
hsa_retrop01489	ptr_retrop10448	ggoiretrop37333	ppy_retrom18286	mmu_retrop38609	NA	NA	NA	NA	NA
hsa_retrop11429	ptr_retrop04116	ggo_retrop01211	ppy_retrop09275	NA	NA	NA	NA	NA	NA
hsa_retrop11426	ptr_retrop04112	ggo_retrop01209	ppy_retrop09267	mmu_retrop09472	NA	NA	NA	NA	NA
hsa_retrop34534	ptr_retrop09468	ggo_retrop03584	ppy_retrop17132	mmu_retrop32047	NA	NA	NA	NA	NA
hsa_retrom03411	ptr_retrom10679	ggo_retrom04799	ppyiretrop40827	mmu_retrop39488	NA	NA	NA	NA	NA
hsa_retrop39724	ptr_retrop06532	ggo_retrop02430	NA	mmu_retrop22507	NA	NA	NA	NA	NA
hsa_retrop01485	ptr_retrop10447	ggoiretrop35690	ppy_retrom18288	mmu_retrop38575	NA	NA	NA	NA	NA
hsa_retrop01484	ptriretrop39346	ggoiretrop34795	NA	mmuiretrop40589	NA	NA	NA	NA	NA
hsa_retrop09490	ptr_retrop05486	ggo_retrop01804	ppy_retrop12112	mmu_retrop17712	NA	NA	NA	NA	NA
hsa_retrom24824	ptr_retrom11027	ggo_retrom01784	NA	mmu_retrom09748	NA	NA	NA	NA	NA
hsa_retrom24827	ptr_retrom11028	ggoiretrom13208	ppy_retrom10846	mmu_retrom09754	NA	NA	NA	NA	NA
hsairetrom27362	ptriretrop34557	ggo_retrom04278	NA	mmu_retrop32948	NA	NA	NA	NA	NA
hsa_retrop31352	ptr_retrom09201	ggo_retrop04240	ppyiretrom35514	mmu_retrom31992	NA	NA	NA	NA	NA
hsa_retrom00679	ptr_retrom09971	ggo_retrom04471	NA	mmu_retrom36344	NA	NA	NA	NA	NA
hsa_retrop10632	ptr_retrop05707	ggo_retrop01967	ppy_retrop12559	mmuiretrop18414	NA	NA	NA	NA	NA
hsa_retrop31353	ptriretrom34060	ggo_retrop04241	ppy_retrom16103	mmu_retrom31983	NA	NA	NA	NA	NA
hsa_retrom15476	ptr_retrom03283	ggo_retrom00675	ppy_retrom06806	mmu_retrom07313	NA	NA	NA	NA	NA
hsa_retrop32274	ptriretrop35769	ggoiretrop33772	ppyiretrop38469	NA	NA	NA	NA	NA	NA
hsa_retrop36864	ptr_retrop08513	ggoiretrop28503	ppy_retrop16213	NA	NA	NA	NA	NA	NA
hsa_retrom31713	ptr_retrop08837	NA	ppy_retrop16753	mmu_retrop31365	NA	NA	NA	NA	NA
hsa_retrop08301	ptr_retrop04903	ggo_retrop02240	ppy_retrom09233	NA	NA	NA	NA	NA	NA
hsa_retrop15293	ptr_retrop03102	ggo_retrop00659	ppy_retrom06831	mmuiretrom07264	NA	NA	NA	NA	NA
hsa_retrop39733	ptr_retrop06536	ggo_retrop02432	ppy_retrop12829	NA	NA	NA	NA	NA	NA
hsa_retrop15296	ptr_retrop03103	ggo_retrop00660	ppy_retrom06830	mmu_retrom07399	NA	NA	NA	NA	NA
hsa_retrop09303	ptr_retrop05456	ggo_retrop01780	NA	NA	NA	NA	NA	NA	NA
hsa_retrop09300	ptr_retrop05453	ggoiretrop14350	ppy_retrop12067	NA	NA	NA	NA	NA	NA
hsa_retrom00694	ptr_retrom09981	ggoiretrom35284	ppyiretrop43303	NA	NA	NA	NA	NA	NA
hsa_retrop15966	ptr_retrom03072	ggo_retrop01065	ppy_retrop06136	mmu_retrop07255	NA	NA	NA	NA	NA
hsa_retrop01391	NA	ggoiretrop37312	ppy_retrom18328	mmu_retrop38491	NA	NA	NA	NA	NA
hsa_retrom34984	ptr_retrom08507	ggoiretrom28522	ppy_retrom15216	mmu_retrop27953	NA	NA	NA	NA	NA
hsa_retrom29100	ptriretrom37109	ggoiretrom31499	NA	mmu_retrop35080	NA	NA	NA	NA	NA
hsa_retrom27377	ptr_retrom09424	ggo_retrom03951	ppy_retrom16391	NA	NA	NA	NA	NA	NA
hsairetrom03877	ptriretrom18587	ggoiretrom21861	ppyiretrom20294	mmuiretrom16363	NA	NA	NA	NA	NA
hsa_retrop25796	ptr_retrop02111	ggo_retrop00483	NA	mmu_retrom08459	mus_retrop112646	rnoiretrop35637	NA	oan_retrom129105	NA
hsa_retrom03254	ptr_retrom10630	ggoiretrom36054	ppy_retrop18535	NA	NA	NA	NA	NA	NA
hsa_retrom32294	ptr_retrom09036	ggoiretrom26992	ppy_retrom15952	mmu_retrom31333	NA	NA	NA	NA	NA
hsa_retrom35295	ptr_retrom08583	ggo_retrom03894	ppy_retrom15358	mmu_retrop27566	NA	NA	NA	NA	NA
hsa_retrom04973	ptriretrom19546	ggo_retrom02856	NA	NA	NA	NA	NA	NA	NA
hsa_retrom35297	ptr_retrom08585	ggo_retrom03895	NA	NA	NA	NA	NA	NA	NA
hsa_retrom04978	ptr_retrom05629	ggo_retrom02857	ppy_retrom10657	NA	NA	NA	NA	NA	NA
hsa_retrop18003	ptriretrop06392	ggo_retrop00213	ppy_retrop03545	mmuiretrop03812	NA	NA	NA	NA	NA
hsa_retrom35062	ptr_retrom08532	ggo_retrom03862	ppy_retrom15284	mmu_retrop27807	NA	NA	NA	NA	NA
hsa_retrop27669	ptr_retrop01915	ggo_retrop00138	NA	mmu_retrop11748	NA	NA	NA	NA	NA
hsa_retrop18006	ptr_retrop02227	ggo_retrop00214	ppy_retrop03546	mmu_retrop04347	NA	NA	NA	NA	NA
hsa_retrop24460	ptr_retrop11416	ggo_retrop01649	ppy_retrop10859	NA	NA	NA	NA	NA	NA
hsa_retrom00218	ptr_retrom09932	NA	ppyiretrop43502	mmuiretrom35992	NA	NA	NA	NA	NA
hsa_retrom27067	ptriretrom04872	ggoiretrom00512	ppy_retrom02819	mmuiretrom08489	NA	NA	NA	NA	NA
hsairetrom05050	ptriretrom19625	NA	ppy_retrom10682	mmu_retrom15515	NA	NA	NA	NA	NA
hsa_retrop13572	ptr_retrop03197	ggo_retrop00731	ppy_retrop07171	mmu_retrop28255	NA	NA	NA	NA	NA
hsa_retrom04999	ptr_retrom05634	ggo_retrom02860	ppy_retrom10669	mmu_retrom15490	NA	NA	NA	NA	NA
hsa_retrom26227	ptriretrom06020	ggoiretrom02769	ppy_retrom05178	mmuiretrop09784	NA	NA	NA	NA	NA
hsa_retrop40635	ptr_retrop05828	ggo_retrop01433	ppy_retrom11294	mmu_retrom11725	NA	NA	NA	NA	NA
hsa_retrop28173	ptr_retrop09869	ggo_retrop03942	ppy_retrom16977	mmu_retrop35738	NA	NA	NA	NA	NA
hsa_retrop29170	ptr_retrop09969	NA	ppyiretrom37326	mmuiretrom31043	NA	NA	NA	NA	NA
hsa_retrop17268	ptr_retrop02595	NA	ppy_retrop07047	mmu_retrop06981	NA	NA	NA	NA	NA
hsa_retrop11292	ptr_retrop01595	ggoiretrop09234	NA	mmuiretrop08936	NA	NA	NA	NA	NA
hsa_retrom35031	ptriretrom30677	ggoiretrom28529	ppy_retrom15244	mmu_retrop27861	NA	NA	NA	NA	NA
hsa_retrom07579	ptriretrom17267	ggo_retrom02339	ppy_retrop09430	NA	NA	NA	NA	NA	NA
hsa_retrop36977	ptriretrop31159	NA	ppyiretrop34124	mmuiretrop25463	NA	NA	NA	NA	NA
hsa_retrom22312	ptr_retrom04123	ggoiretrom10411	NA	mmu_retrom17574	NA	NA	NA	NA	NA
hsa_retrom35589	ptr_retrom07355	ggo_retrom03146	ppy_retrop14472	mmu_retrop36857	NA	NA	NA	NA	NA
hsa_retrop37878	NA	ggo_retrop03049	ppy_retrom13682	mmu_retrom35094	NA	NA	NA	NA	NA
hsa_retrom29145	ptriretrom37169	ggo_retrom04156	NA	mmu_retrop35064	NA	NA	NA	NA	NA
hsa_retrom42383	ptriretrom26330	ggo_retrom03082	ppy_retrom13311	NA	NA	NA	NA	NA	NA
hsa_retrop21156	ptr_retrop02488	ggo_retrop00379	ppy_retrop04831	NA	NA	NA	NA	NA	NA
hsa_retrom03320	ptr_retrom10646	ggoiretrom34037	ppy_retrop18504	mmu_retrop39531	NA	NA	NA	NA	NA
hsairetrom14860	ptr_retrop03050	ggo_retrom00639	NA	NA	NA	NA	NA	NA	NA
hsa_retrom03636	ptr_retrom10761	ggo_retrom04838	ppy_retrop18364	mmu_retrop40371	NA	NA	NA	NA	NA
hsa_retrop11600	ptriretrop15537	ggoiretrop09145	ppyiretrop17752	mmuiretrop08645	NA	NA	NA	NA	NA
hsa_retrom03639	ptr_retrom10764	ggo_retrom04839	NA	mmu_retrop40370	NA	NA	NA	NA	NA
hsa_retrom31914	ptr_retrom08948	ggo_retrom03560	ppy_retrom15766	mmu_retrom30906	NA	NA	NA	NA	NA
hsa_retrom38989	ptr_retrom06107	ggo_retrom01556	ppy_retrop11483	NA	NA	NA	NA	NA	NA
hsa_retrom16992	ptr_retrom02779	ggoiretrom03431	ppy_retrom06994	mmu_retrom05578	NA	NA	NA	NA	NA
hsa_retrom31910	ptriretrom32623	ggoiretrom26352	ppyiretrom34296	NA	NA	NA	NA	NA	NA
hsa_retrom07532	ptr_retrom05079	ggoiretrom18077	ppyiretrop18190	NA	NA	NA	NA	NA	NA
hsa_retrom27477	ptr_retrom09453	ggo_retrom03960	ppy_retrop18021	mmu_retrom34384	NA	NA	NA	NA	NA
hsa_retrop25130	ptr_retrop11610	ggo_retrop01758	NA	mmu_retrop12737	NA	NA	NA	NA	NA
hsa_retrop13111	ptr_retrop03777	ggo_retrop00983	NA	NA	NA	NA	NA	NA	NA
hsa_retrom42633	ptriretrom26510	NA	ppy_retrom13394	mmu_retrom24026	NA	NA	NA	NA	NA
hsa_retrom40765	ptriretrom24969	ggo_retrom02893	ppy_retrom12762	mmu_retrom22453	NA	NA	NA	NA	NA
hsa_retrom41451	ptr_retrom07047	ggoiretrom22547	ppyiretrom28090	mmu_retrom23102	mus_retrom106670	rno_retrom04332	NA	NA	NA
hsairetrom31678	ptriretrom30343	ggo_retrom03820	ppyiretrom32409	mmu_retrom26127	NA	NA	NA	NA	NA
hsairetrop18652	ptriretrop06894	NA	ppy_retrop03873	mmu_retrop04712	NA	NA	NA	NA	NA
hsa_retrom38425	ptr_retrom06856	ggo_retrom02686	ppy_retrom12566	NA	NA	NA	NA	NA	NA
hsa_retrop37872	ptr_retrom07416	ggoiretrop24225	NA	mmuiretrom34005	NA	NA	NA	NA	NA
hsa_retrop43964	ptr_retrop07034	NA	ppy_retrop13824	mmu_retrop24705	NA	NA	NA	NA	NA
hsa_retrom41759	ptr_retrom07100	ggo_retrom03015	ppy_retrom13087	NA	NA	NA	NA	NA	NA
hsa_retrom36571	ptr_retrom07613	ggo_retrom03312	NA	NA	NA	NA	NA	NA	NA
hsa_retrop05482	ptr_retrop05327	ggoiretrop20576	ppyiretrom20653	mmuiretrom15746	NA	NA	NA	NA	NA
hsairetrop00729	ptriretrop38901	ggo_retrop04474	ppy_retrom18549	mmu_retrop38147	NA	NA	NA	NA	NA
hsa_retrom28304	ptriretrom35989	ggoiretrom30737	NA	NA	NA	NA	NA	NA	NA
hsa_retrop08318	ptr_retrop04905	NA	ppy_retrom09221	mmu_retrom12156	NA	NA	NA	NA	NA
hsa_retrom29780	ptr_retrop09646	ggoiretrom32691	ppy_retrop17342	mmu_retrop33110	NA	NA	NA	NA	NA
hsa_retrop10640	ptr_retrop05709	ggo_retrop01968	NA	mmu_retrop18737	NA	NA	NA	NA	NA
hsa_retrom37853	ptr_retrom06715	ggo_retrom02569	ppy_retrom12372	mmu_retrom21021	NA	NA	NA	NA	NA
hsairetrop26624	ptriretrop37628	ggoiretrop32581	NA	mmuiretrom32036	NA	NA	NA	NA	NA
hsa_retrop12515	ptriretrop12706	ggo_retrop00909	ppy_retrop07794	mmu_retrop29631	NA	NA	NA	NA	NA
hsa_retrom09115	ptr_retrop05602	ggo_retrom01973	NA	mmu_retrom16068	NA	NA	NA	NA	NA
hsa_retrom28434	ptr_retrom09608	ggo_retrom04044	ppy_retrop17774	NA	NA	NA	NA	NA	NA
hsa_retrom28432	ptr_retrom09606	ggo_retrom04042	ppy_retrop17779	mmu_retrom32714	NA	NA	NA	NA	NA
hsa_retrom09443	ptr_retrop05551	ggoiretrom14770	ppyiretrom25032	mmuiretrom17125	NA	NA	NA	NA	NA
hsa_retrom26278	ptr_retrom02180	ggo_retrom00462	ppyiretrom08427	mmu_retrop09844	NA	NA	NA	NA	NA
hsairetrom03121	ptr_retrom10649	ggo_retrom04774	ppy_retrop18500	mmu_retrop39523	NA	NA	NA	NA	NA
hsa_retrop36262	ptr_retrop08363	ggo_retrop03724	ppy_retrop15977	NA	NA	NA	NA	NA	NA
hsa_retrop40095	ptr_retrop06623	ggo_retrop02485	ppy_retrop13044	mmu_retrop22837	NA	NA	NA	NA	NA
hsairetrom11818	ptriretrom12807	ggo_retrom00965	NA	mmuiretrom25993	NA	NA	NA	NA	NA
hsairetrom06180	ptriretrom16786	ggoiretrom18344	ppy_retrop09658	NA	NA	NA	NA	NA	NA
hsa_retrom17111	ptr_retrom02802	ggoiretrom03565	ppy_retrom07042	NA	NA	NA	NA	NA	NA
hsa_retrop16236	ptriretrom08898	ggoiretrom26833	NA	NA	NA	NA	NA	NA	NA
hsa_retrop32976	ptr_retrom08801	ggo_retrop03444	NA	mmuiretrop30215	NA	NA	NA	NA	NA
hsa_retrop33192	ptriretrop32848	ggoiretrop27684	ppyiretrop35717	mmuiretrop30257	NA	NA	NA	NA	NA
hsa_retrom36218	ptr_retrom07544	ggo_retrom03271	ppy_retrop14501	mmu_retrop36977	NA	NA	NA	NA	NA
hsa_retrop08831	ptr_retrop05049	ggo_retrop02306	ppy_retrop10229	mmu_retrop15984	NA	NA	NA	NA	NA
hsa_retrom04684	NA	ggo_retrom02806	ppy_retrop10626	mmu_retrop16905	NA	NA	NA	NA	NA
hsa_retrop37193	ptr_retrop08605	ggoiretrop29287	ppy_retrop16372	mmu_retrom26521	NA	NA	NA	NA	NA
hsa_retrop03315	ptriretrop40671	ggoiretrop35960	ppyiretrom40310	NA	NA	NA	NA	NA	NA
hsa_retrop33195	ptr_retrop08848	ggo_retrop03472	NA	mmu_retrop31434	NA	NA	NA	NA	NA
hsa_retrop08838	ptr_retrop05054	ggo_retrop02307	ppy_retrop10233	mmu_retrop16002	NA	NA	NA	NA	NA
hsa_retrop17046	ptr_retrop02548	ggo_retrop00507	ppy_retrop06935	mmu_retrop06712	NA	NA	NA	NA	NA
hsa_retrop16307	ptr_retrom03004	ggo_retrom03475	ppy_retrop06228	mmu_retrop07766	NA	NA	NA	NA	NA
hsa_retrom01319	ptr_retrom10154	ggoiretrom35812	ppyiretrop42548	NA	NA	NA	NA	NA	NA
hsa_retrom28239	ptr_retrom09543	ggoiretrom30726	ppyiretrop39083	mmu_retrop34279	NA	NA	NA	NA	NA
hsairetrop21410	ptriretrop42258	ggoiretrop12848	ppy_retrom10777	NA	NA	NA	NA	NA	NA
hsairetrop01527	ptr_retrop10498	ggoiretrop35755	ppyiretrom41191	NA	NA	NA	NA	NA	NA
hsa_retrop17281	ptriretrop08190	ggoiretrop03744	ppyiretrop12825	NA	NA	NA	NA	NA	NA
hsa_retrop05796	ptr_retrop05399	ggoiretrop20272	ppy_retrop10769	mmu_retrop17314	NA	NA	NA	NA	NA
hsa_retrop21890	NA	ggo_retrop01314	ppyiretrom16232	mmu_retrop19643	NA	NA	NA	NA	NA
hsa_retrop42883	ptr_retrop06815	ggoiretrop23313	ppy_retrop13453	NA	NA	NA	NA	NA	NA
hsa_retrom36630	ptr_retrom07621	ggo_retrom03323	ppyiretrom30608	mmu_retrom35572	NA	NA	NA	NA	NA
hsa_retrop14586	ptr_retrop02971	ggo_retrop00581	NA	mmu_retrop08568	NA	NA	NA	NA	NA
hsa_retrop31666	ptr_retrop09685	ggo_retrop04303	ppy_retrop17472	mmu_retrop33230	mus_retrom102170	NA	NA	NA	NA
hsa_retrop41383	ptr_retrop06003	ggo_retrop01527	ppy_retrop11575	NA	NA	NA	NA	NA	NA
hsa_retrop32489	ptriretrop31922	NA	ppy_retrop16509	mmuiretrop30696	NA	NA	NA	NA	NA
hsa_retrom08229	ptriretrom18092	ggo_retrom02447	ppyiretrom19790	mmu_retrom14164	NA	NA	NA	NA	NA
hsa_retrom31581	ptr_retrop08714	ggo_retrop01072	ppyiretrom34027	mmu_retrom30575	NA	NA	NA	NA	NA
hsa_retrom08886	NA	ggoiretrom14385	ppy_retrom00917	mmuiretrom16706	NA	NA	NA	NA	NA
hsa_retrom04574	ptr_retrom05521	ggo_retrom02779	NA	NA	NA	NA	NA	NA	NA
hsa_retrom32324	ptriretrom33298	ggoiretrom26998	NA	mmuiretrom28214	NA	NA	NA	NA	NA
hsa_retrom04578	ptriretrom18898	ggoiretrom21614	ppyiretrop21231	mmu_retrop17064	NA	NA	NA	NA	NA
hsa_retrop06910	ptr_retrop04602	ggoiretrop17244	ppy_retrom09401	mmu_retrom13005	NA	NA	NA	NA	NA
hsa_retrop06848	ptriretrop16667	ggo_retrop02125	ppy_retrom09432	mmu_retrom13110	NA	NA	NA	NA	NA
hsa_retrop44004	ptr_retrop07042	ggo_retrop02903	ppy_retrop13843	mmu_retrop24753	NA	NA	NA	NA	NA
hsa_retrop33289	ptr_retrop08887	ggoiretrop26629	ppy_retrop16822	mmu_retrop31545	NA	NA	NA	NA	NA
hsa_retrop08947	ptr_retrop05077	ggo_retrop02328	ppy_retrop10287	mmu_retrop16113	NA	NA	NA	NA	NA
hsa_retrop03224	ptr_retrop10709	ggoiretrop36436	ppy_retrom17957	NA	NA	NA	NA	NA	NA
hsa_retrom24958	ptr_retrom11061	ggo_retrom01801	NA	mmu_retrom09931	NA	NA	NA	NA	NA
hsa_retrom06263	ptr_retrom04946	ggo_retrom02223	ppy_retrop09652	NA	NA	NA	NA	NA	NA
hsa_retrop17137	ptriretrop08005	ggo_retrop00526	ppy_retrop06987	mmu_retrop06835	NA	NA	NA	NA	NA
hsa_retrom06261	ptr_retrom04945	ggo_retrom02222	NA	mmu_retrop14807	NA	NA	NA	NA	NA
hsa_retrop32574	ptr_retrom08897	ggo_retrom01202	ppy_retrop16548	mmu_retrop30552	NA	NA	NA	NA	NA
hsa_retrop32573	ptr_retrom08898	ggo_retrom01203	ppyiretrop34988	mmu_retrop30549	NA	NA	NA	NA	NA
hsa_retrop40560	NA	ggo_retrop01422	ppyiretrom23174	mmu_retrom11772	NA	NA	NA	NA	NA
hsa_retrom32139	ptr_retrom09005	ggo_retrom03600	ppy_retrom15890	mmu_retrom31159	NA	NA	NA	NA	NA
hsa_retrom01063	ptr_retrom10102	ggoiretrom36720	ppyiretrop42823	mmu_retrom36703	NA	NA	NA	NA	NA
hsa_retrop44402	NA	ggo_retrop02965	ppy_retrop14045	mmu_retrop25280	NA	NA	NA	NA	NA
hsa_retrom24437	ptr_retrom04306	ggoiretrom10554	ppy_retrom08506	mmu_retrom20306	NA	NA	NA	NA	NA
hsa_retrop11198	ptr_retrop04081	ggo_retrop01181	NA	NA	NA	NA	NA	NA	NA
hsa_retrom07958	ptr_retrom05178	ggo_retrom02402	ppyiretrom19524	mmu_retrom14013	NA	NA	NA	NA	NA
hsairetrom35482	ptriretrom23931	ggoiretrom20163	ppyiretrom26422	mmu_retrom21139	NA	NA	NA	NA	NA
hsa_retrop11191	ptr_retrop04079	ggo_retrop01180	ppy_retrop09186	NA	NA	NA	NA	NA	NA
hsa_retrop13909	ptr_retrop03272	NA	ppy_retrop07302	mmu_retrop28600	NA	NA	NA	NA	NA
hsa_retrop03761	ptriretrop41224	ggo_retrop04742	ppy_retrom17742	mmu_retrom38186	NA	NA	NA	NA	NA
hsa_retrop03764	ptr_retrop10840	ggo_retrop04744	ppy_retrom17741	NA	NA	NA	NA	NA	NA
hsa_retrom08539	ptr_retrom05663	ggo_retrom01899	ppy_retrom11646	mmu_retrom15643	NA	NA	NA	NA	NA
hsa_retrom09843	ptriretrom21676	ggo_retrom02087	ppy_retrom12212	mmu_retrom17034	NA	NA	NA	NA	NA
hsa_retrop16421	ptriretrom08629	ggo_retrom03455	ppy_retrom06409	NA	NA	NA	NA	NA	NA
hsa_retrom09846	ptriretrom21684	ggo_retrom02089	ppy_retrom12214	mmu_retrom17044	mus_retrop92666	NA	NA	NA	NA
hsa_retrop09941	ptr_retrom05912	ggo_retrop01874	ppy_retrop12289	NA	NA	NA	NA	NA	NA
hsa_retrop03166	ptr_retrop10690	NA	ppyiretrom40582	mmu_retrop39179	NA	NA	NA	NA	NA
hsa_retrop41451	ptr_retrop06025	ggo_retrop01537	ppy_retrop11607	mmu_retrop13890	NA	NA	NA	NA	NA
hsa_retrom41732	ptr_retrom07095	ggo_retrom03013	NA	NA	NA	NA	NA	NA	NA
hsa_retrom14133	ptr_retrom03388	ggo_retrom00751	ppy_retrom07160	mmu_retrom26915	NA	NA	NA	NA	NA
hsa_retrop32712	ptr_retrom08854	ggo_retrom01172	ppy_retrop16631	mmu_retrop30835	NA	NA	NA	NA	NA
hsa_retrom28592	ptriretrom36352	ggo_retrom04063	ppy_retrop17703	mmu_retrom32829	NA	NA	NA	NA	NA
hsairetrop37208	ptriretrop24479	ggoiretrop20035	ppyiretrop27845	mmuiretrop23105	musiretrop08845	rnoiretrop24671	NA	NA	NA
hsa_retrop44052	ptr_retrop07057	NA	ppy_retrop13876	mmu_retrop24817	NA	NA	NA	NA	NA
hsa_retrom32737	ptr_retrom07775	ggo_retrom03666	NA	NA	NA	NA	NA	NA	NA
hsa_retrop32719	ptr_retrom08851	ggo_retrom01170	ppy_retrop16634	mmu_retrop30841	NA	NA	NA	NA	NA
hsairetrop17542	ptr_retrop02597	ggo_retrop00544	ppy_retrop07053	mmu_retrop06986	NA	NA	NA	NA	NA
hsa_retrom38119	ptr_retrom06791	ggoiretrom19954	ppyiretrom26629	mmu_retrom21224	NA	NA	NA	NA	NA
hsa_retrom32733	ptriretrom29027	ggo_retrom03664	ppy_retrom14156	mmu_retrom24427	NA	NA	NA	NA	NA
hsa_retrom39281	ptriretrom22093	ggo_retrom01581	ppy_retrop11314	mmu_retrop13476	mus_retrom99082	rno_retrom05320	NA	NA	NA
hsa_retrom28898	ptriretrom36810	ggoiretrom30886	ppyiretrom38384	mmu_retrop35338	NA	NA	NA	NA	NA
hsa_retrop32028	ptr_retrop09756	ggo_retrop04358	NA	mmu_retrop33627	NA	NA	NA	NA	NA
hsa_retrop00322	ptriretrop38630	ggo_retrop04449	ppy_retrom18614	NA	NA	NA	NA	NA	NA
hsa_retrom28891	NA	ggo_retrom04115	ppy_retrom17115	mmu_retrop35339	NA	NA	NA	NA	NA
hsa_retrom34573	NA	ggo_retrom03788	ppy_retrom15088	mmuiretrom22481	NA	NA	NA	NA	NA
hsa_retrop39269	ptriretrop29117	ggo_retrop03296	ppy_retrop15175	mmu_retrop37730	NA	NA	NA	NA	NA
hsa_retrom39091	ptriretrom21969	ggo_retrom01565	NA	NA	NA	NA	NA	NA	NA
hsa_retrop41660	ptriretrop22637	ggo_retrop01555	ppy_retrop11665	mmu_retrom11271	NA	NA	NA	NA	NA
hsa_retrom04197	ptr_retrom05497	ggo_retrom02750	ppy_retrom10410	NA	NA	NA	NA	NA	NA
hsa_retrop31285	ptr_retrop09614	ggo_retrop04225	ppy_retrop17330	mmu_retrop32919	NA	NA	NA	NA	NA
hsa_retrop10801	ptr_retrop05739	ggo_retrop01994	ppy_retrop12623	mmu_retrop18819	NA	NA	NA	NA	NA
hsa_retrop31280	ptr_retrop09612	ggo_retrop04224	ppyiretrop37262	mmu_retrop32916	NA	NA	NA	NA	NA
hsa_retrop09800	ptriretrom20933	ggo_retrop01844	ppy_retrop12233	NA	NA	NA	NA	NA	NA
hsa_retrom41688	ptriretrom25781	ggoiretrom23185	ppyiretrom28338	NA	NA	NA	NA	NA	NA
hsa_retrom22206	ptriretrom13944	ggoiretrom10374	NA	mmuiretrom18857	NA	NA	NA	NA	NA
hsa_retrom15661	ptr_retrom02831	ggo_retrom01087	ppy_retrom06012	mmu_retrom05895	NA	NA	NA	NA	NA
hsa_retrop39468	ptr_retrop00686	ggo_retrop02383	ppyiretrom25826	mmuiretrom21152	NA	NA	NA	NA	NA
hsa_retrop31289	ptr_retrop09616	ggo_retrop04226	ppy_retrop17333	mmu_retrop32922	NA	NA	NA	NA	NA
hsa_retrop02787	ptr_retrom10205	ggo_retrop04617	NA	NA	NA	NA	NA	NA	NA
hsa_retrop37613	ptr_retrop07209	NA	ppy_retrom13828	mmu_retrom35351	NA	NA	NA	NA	NA
hsairetrom04427	ptr_retrom05539	ggoiretrom20899	ppy_retrop10654	mmu_retrop16981	NA	NA	NA	NA	NA
hsa_retrop36719	ptriretrop30779	ggo_retrop03793	ppyiretrop33794	mmu_retrop27142	NA	NA	NA	NA	NA
hsairetrom08384	ptr_retrom05673	ggo_retrom01903	ppy_retrom11654	NA	NA	NA	NA	NA	NA
hsa_retrop36716	ptr_retrop08453	NA	ppy_retrop16160	mmu_retrop27133	NA	NA	NA	NA	NA
hsa_retrom34772	ptr_retrom08454	ggo_retrom03817	ppyiretrom32392	mmu_retrom26125	NA	NA	NA	NA	NA
hsa_retrom35282	ptriretrom31057	ggoiretrom28590	ppyiretrom33080	NA	NA	NA	NA	NA	NA
hsa_retrom04756	ptr_retrom05569	ggo_retrom02814	ppy_retrop10608	mmu_retrop16844	NA	NA	NA	NA	NA
hsa_retrop39869	ptr_retrop06572	ggo_retrop02456	NA	NA	NA	NA	NA	NA	NA
hsa_retrom41426	ptr_retrom07038	ggoiretrom22544	ppy_retrom12997	NA	NA	NA	NA	NA	NA
hsa_retrop39860	ptr_retrop06564	ggo_retrop02452	ppy_retrop12912	mmu_retrop22675	NA	NA	NA	NA	NA
hsa_retrop32622	ptr_retrom08879	ggo_retrom01190	ppy_retrop16572	mmu_retrop30637	NA	NA	NA	NA	NA
hsa_retrom19146	ptr_retrom02537	ggoiretrom01527	ppy_retrom03981	NA	NA	NA	NA	NA	NA
hsa_retrom34511	ptriretrom29976	ggoiretrom28048	ppy_retrom15059	NA	NA	NA	NA	NA	NA
hsa_retrop04265	ptr_retrop10971	ggo_retrop04830	ppy_retrom17546	NA	NA	NA	NA	NA	NA
hsa_retrop01035	ptriretrop39029	ggo_retrop04488	NA	mmuiretrop37585	NA	NA	NA	NA	NA
hsa_retrop20165	ptriretrop07358	ggoiretrop02749	ppyiretrop07804	NA	NA	NA	NA	NA	NA
hsa_retrop39600	ptriretrop23528	ggoiretrop19208	ppy_retrop12783	mmu_retrop22338	NA	NA	NA	NA	NA
hsa_retrop36470	NA	ggo_retrop03745	ppy_retrop16023	mmu_retrop26740	NA	NA	NA	NA	NA
hsa_retrom41487	ptr_retrom07051	ggo_retrom02978	NA	NA	NA	NA	NA	NA	NA
hsa_retrop39606	ptr_retrop06487	ggo_retrop02407	NA	mmu_retrop22355	NA	NA	NA	NA	NA
hsa_retrom15054	ptr_retrom03200	ggoiretrom03970	ppy_retrop06594	NA	NA	NA	NA	NA	NA
hsa_retrop41355	ptr_retrop05993	ggo_retrop01520	ppy_retrop11562	mmu_retrop13806	NA	NA	NA	NA	NA
hsa_retrop18273	ptriretrop06585	ggo_retrop00239	NA	NA	NA	NA	NA	NA	NA
hsa_retrop18276	ptr_retrop02313	ggo_retrop00240	NA	mmu_retrop04475	NA	NA	NA	NA	NA
hsa_retrop39590	ptr_retrop06483	ggo_retrop02402	ppy_retrop12775	mmu_retrop22326	NA	NA	NA	NA	NA
hsa_retrom10584	ptr_retrom04464	ggo_retrom01334	ppy_retrom09115	mmu_retrom08333	NA	NA	NA	NA	NA
hsa_retrom28944	ptriretrom36917	ggoiretrom31469	ppyiretrom38483	NA	NA	NA	NA	NA	NA
hsa_retrom10586	ptr_retrom04465	ggo_retrom01335	ppy_retrom09117	mmu_retrom08345	NA	NA	NA	NA	NA
hsa_retrop16885	ptr_retrom02744	ggoiretrop03815	ppy_retrom06928	mmu_retrom05428	NA	NA	NA	NA	NA
hsa_retrop03545	ptriretrop40864	ggoiretrop34923	ppyiretrom40130	mmu_retrop40054	NA	NA	NA	NA	NA
hsairetrop18492	ptriretrop06740	ggo_retrop00257	ppy_retrop03823	NA	NA	NA	NA	NA	NA
hsa_retrom40066	ptr_retrom06416	ggo_retrom01644	ppy_retrom11367	mmu_retrom11809	NA	NA	NA	NA	NA
hsa_retrom10344	ptr_retrom04395	ggo_retrom01291	NA	mmu_retrom07944	NA	NA	NA	NA	NA
hsairetrom17559	ptriretrom08306	ggoiretrom03748	ppyiretrom12594	NA	NA	NA	NA	NA	NA
hsa_retrom14826	ptr_retrom03172	ggo_retrom00583	ppy_retrom06566	mmu_retrom06822	NA	NA	NA	NA	NA
hsa_retrop18403	ptr_retrop02327	ggoiretrop01290	NA	NA	NA	NA	NA	NA	NA
hsa_retrop03787	ptr_retrop10841	ggo_retrop04747	ppy_retrom17740	mmu_retrom38183	NA	NA	NA	NA	NA
hsa_retrop43542	NA	ggoiretrop21837	ppy_retrop13694	mmu_retrop24329	NA	NA	NA	NA	NA
hsa_retrop36685	ptr_retrop00692	ggoiretrop29170	ppyiretrop33749	mmu_retrop27084	NA	NA	NA	NA	NA
hsairetrom31887	ptriretrom30596	ggoiretrom28514	ppyiretrom32648	mmuiretrop24257	NA	NA	NA	NA	NA
hsa_retrop28213	ptr_retrop09877	ggo_retrop03945	ppy_retrom16951	mmu_retrop35812	NA	NA	NA	NA	NA
hsa_retrom40118	ptriretrom22525	ggoiretrom11846	ppy_retrom11407	mmu_retrom11908	NA	NA	NA	NA	NA
hsa_retrom34202	ptr_retrom08329	ggo_retrom03724	ppy_retrom14939	mmu_retrom25613	NA	NA	NA	NA	NA
hsa_retrom10560	ptr_retrom04455	NA	ppy_retrom09105	mmu_retrom08305	NA	NA	NA	NA	NA
hsa_retrom35354	ptr_retrom08599	ggo_retrom03905	ppy_retrom15388	mmu_retrop27505	NA	NA	NA	NA	NA
hsa_retrom27531	NA	ggo_retrom03969	ppy_retrop18003	mmu_retrop34883	NA	NA	NA	NA	NA
hsa_retrom29346	NA	ggo_retrom04185	ppy_retrom17308	mmu_retrop35926	NA	NA	NA	NA	NA
hsa_retrop05317	ptriretrop18689	ggo_retrop02606	ppy_retrom10552	mmu_retrom15116	NA	NA	NA	NA	NA
hsa_retrop11457	ptr_retrop04119	ggo_retrop01213	ppy_retrop09281	mmu_retrop09509	NA	NA	NA	NA	NA
hsa_retrom38396	ptr_retrom06845	ggo_retrom02681	ppy_retrom12549	mmu_retrom21381	NA	NA	NA	NA	NA
hsa_retrom29203	ptriretrom37219	ggoiretrom30953	ppy_retrom17240	mmu_retrop34989	NA	NA	NA	NA	NA
hsa_retrom29200	ptr_retrom09840	ggoiretrom30952	ppy_retrom17237	mmu_retrop35002	NA	NA	NA	NA	NA
hsa_retrom35183	ptr_retrom08550	NA	ppy_retrom15312	mmu_retrop27695	NA	NA	NA	NA	NA
hsa_retrop24073	ptr_retrop04026	ggo_retrop01385	ppyiretrop15993	NA	NA	NA	NA	NA	NA
hsa_retrom38391	ptr_retrom06844	NA	ppy_retrom12541	mmu_retrom21374	NA	NA	NA	NA	NA
hsa_retrop09153	ptr_retrop05197	ggo_retrop02358	ppy_retrop10434	mmu_retrop16318	NA	NA	NA	NA	NA
hsairetrom01520	ptr_retrop10616	ggoiretrom36356	ppy_retrop18988	mmuiretrom36119	NA	NA	NA	NA	NA
hsa_retrop36872	ptriretrop30996	ggoiretrop29211	ppyiretrop33979	mmuiretrop24117	NA	NA	NA	NA	NA
hsa_retrom38399	ptr_retrom06847	ggoiretrom20443	NA	mmu_retrom21382	NA	NA	NA	NA	NA
hsa_retrom31875	ptr_retrom08937	ggo_retrom03552	ppy_retrom15750	mmu_retrom30855	NA	NA	NA	NA	NA
hsa_retrom31707	ptr_retrom08915	ggo_retrom03539	ppy_retrom15717	mmu_retrom30725	NA	NA	NA	NA	NA
hsa_retrop24671	ptr_retrop11485	ggoiretrop12937	ppy_retrop10956	mmu_retrop12253	NA	NA	NA	NA	NA
hsa_retrop37871	ptr_retrom07417	ggo_retrop03047	ppy_retrom13686	mmu_retrom35117	NA	NA	NA	NA	NA
hsa_retrop16955	ptriretrom07730	ggoiretrop03679	NA	NA	NA	NA	NA	NA	NA
hsa_retrom10168	ptr_retrom04383	ggo_retrom01273	NA	NA	NA	NA	NA	NA	NA
hsa_retrop09793	ptr_retrom05956	NA	ppy_retrop12228	mmu_retrop17915	NA	NA	NA	NA	NA
hsa_retrop16950	ptriretrom07749	ggo_retrop00498	ppy_retrom06910	mmu_retrop06579	mus_retrop46040	rno_retrop00678	NA	NA	NA
hsairetrop40030	ptriretrop25311	ggoiretrop21579	ppyiretrop28749	NA	NA	NA	NA	NA	NA
hsa_retrop37365	ptr_retrop08646	ggo_retrop03897	ppy_retrop16472	NA	NA	NA	NA	NA	NA
hsa_retrom35136	ptr_retrom08548	ggo_retrom03871	NA	NA	NA	NA	NA	NA	NA
hsairetrom36550	ptriretrom21926	ggo_retrom01560	NA	mmuiretrop13311	NA	NA	NA	NA	NA
hsa_retrom41500	ptr_retrom07054	ggoiretrom23150	ppy_retrom13015	NA	NA	NA	NA	NA	NA
hsa_retrom30145	ptr_retrom09263	ggoiretrom32793	ppy_retrom16239	mmu_retrom32216	mus_retrop96971	rnoiretrop45337	NA	NA	NA
hsa_retrop25789	ptr_retrop02109	ggo_retrop00481	ppyiretrop09047	NA	NA	NA	NA	NA	NA
hsairetrop29437	ptriretrom32109	ggo_retrom01177	ppyiretrop35173	NA	NA	NA	NA	NA	NA
hsa_retrom28242	ptr_retrom09544	ggo_retrom04020	ppy_retrop17859	NA	NA	NA	NA	NA	NA
hsa_retrop39898	ptr_retrop06580	ggoiretrop19286	ppy_retrop12939	mmu_retrop22697	NA	NA	NA	NA	NA
hsa_retrom16695	ptriretrom09600	ggoiretrop26369	ppy_retrom06510	mmu_retrom06726	NA	NA	NA	NA	NA
hsa_retrom40846	ptr_retrom06934	ggo_retrom02908	ppyiretrom27537	mmu_retrom22578	NA	NA	NA	NA	NA
hsa_retrom37888	ptr_retrom06727	ggoiretrom19409	ppyiretrom26345	NA	NA	NA	NA	NA	NA
hsa_retrom04966	ptr_retrom05626	ggo_retrom02855	ppy_retrom10646	mmu_retrom15435	NA	NA	NA	NA	NA
hsa_retrom04212	ptriretrom18724	ggo_retrom02753	ppy_retrom10413	mmu_retrom14747	NA	NA	NA	NA	NA
hsa_retrop34643	ptriretrop33914	ggo_retrop03599	ppyiretrop36808	mmu_retrop32211	NA	NA	NA	NA	NA
hsa_retrom03248	NA	ggo_retrom04762	ppy_retrop18538	mmu_retrop39593	NA	NA	NA	NA	NA
hsa_retrom00226	ptriretrom37665	ggoiretrom34606	NA	NA	NA	NA	NA	NA	NA
hsa_retrom34655	NA	ggoiretrom28447	ppy_retrom15103	mmuiretrom22492	NA	NA	NA	NA	NA
hsa_retrom00994	ptr_retrom10076	ggo_retrom04524	ppy_retrop19162	mmu_retrom36663	NA	NA	NA	NA	NA
hsa_retrop09579	ptr_retrop05523	ggo_retrop01813	NA	mmu_retrop17792	NA	NA	NA	NA	NA
hsa_retrom11367	ptr_retrom03746	ggo_retrom00947	ppy_retrom07703	NA	NA	NA	NA	NA	NA
hsa_retrop18015	ptr_retrop02230	ggo_retrop00215	ppy_retrop03548	mmu_retrop04354	NA	NA	NA	NA	NA
hsa_retrom11361	ptr_retrom03744	ggo_retrom00946	NA	mmu_retrom28798	NA	NA	NA	NA	NA
hsa_retrop36494	ptr_retrop08405	ggoiretrop28450	ppy_retrop16047	NA	NA	NA	NA	NA	NA
hsa_retrop09570	ptr_retrop05520	ggo_retrop01811	ppy_retrop12150	mmu_retrop17779	NA	NA	NA	NA	NA
hsa_retrom31675	ptr_retrop08687	ggoiretrom26322	ppy_retrom15708	mmu_retrom30707	NA	NA	NA	NA	NA
hsa_retrop37028	ptr_retrop08568	ggo_retrop03847	ppy_retrop16302	NA	NA	NA	NA	NA	NA
hsa_retrop09576	ptriretrop19957	ggo_retrop01812	NA	mmu_retrop17784	NA	NA	NA	NA	NA
hsa_retrop29519	ptr_retrop10070	NA	ppyiretrom36939	mmu_retrop33972	NA	NA	NA	NA	NA
hsa_retrom00837	ptr_retrom10026	ggoiretrom34699	ppy_retrop19240	mmu_retrom36468	NA	NA	NA	NA	NA
hsa_retrop37258	ptr_retrop08617	ggoiretrop29917	ppy_retrop16399	NA	NA	NA	NA	NA	NA
hsa_retrop25238	ptr_retrop01988	ggo_retrop00390	NA	NA	NA	NA	NA	NA	NA
hsa_retrom36025	ptr_retrom07456	ggo_retrom03224	ppy_retrop14296	NA	NA	NA	NA	NA	NA
hsa_retrom11410	ptriretrom12740	ggo_retrom00956	ppy_retrom07719	mmu_retrom28898	NA	NA	NA	NA	NA
hsa_retrom10838	ptr_retrom03603	ggoiretrom07799	ppy_retrom07481	mmu_retrom28129	NA	NA	NA	NA	NA
hsa_retrom04981	ptr_retrom05630	ggo_retrom02858	ppy_retrom10658	mmu_retrom15441	NA	NA	NA	NA	NA
hsa_retrop13743	ptr_retrop03236	ggo_retrop00762	ppyiretrop13407	NA	NA	NA	NA	NA	NA
hsa_retrop29160	ptriretrop36734	ggoiretrop31485	ppy_retrom16630	NA	NA	NA	NA	NA	NA
hsa_retrom00832	ptriretrom38135	ggoiretrom34179	ppy_retrop19245	NA	NA	NA	NA	NA	NA
hsa_retrom30507	ptr_retrom09354	ggo_retrom04370	ppy_retrom16326	mmu_retrom32460	NA	NA	NA	NA	NA
hsa_retrop43468	ptr_retrop06894	ggo_retrop02821	ppy_retrop13670	mmu_retrop24289	NA	NA	NA	NA	NA
hsa_retrom35006	ptr_retrom08512	ggo_retrom03848	ppy_retrom15222	mmu_retrop27946	NA	NA	NA	NA	NA
hsa_retrom27482	ptr_retrom09456	ggo_retrom03961	ppy_retrop18014	mmu_retrom34397	NA	NA	NA	NA	NA
hsa_retrom27481	ptr_retrom09455	NA	ppy_retrop18019	mmu_retrom34396	NA	NA	NA	NA	NA
hsa_retrop30237	ptr_retrop10204	ggo_retrop04151	ppy_retrop18198	mmu_retrom33818	NA	NA	NA	NA	NA
hsa_retrom27484	ptriretrom35377	ggoiretrom31262	NA	mmu_retrom34401	NA	NA	NA	NA	NA
hsa_retrop07794	ptr_retrop01309	ggo_retrop02197	NA	NA	NA	NA	NA	NA	NA
hsa_retrom36765	ptriretrom28343	ggo_retrom03338	NA	NA	NA	NA	NA	NA	NA
hsa_retrom27488	ptriretrom35386	ggo_retrom03963	ppyiretrop39589	NA	NA	NA	NA	NA	NA
hsa_retrom03332	ptriretrom40568	ggoiretrom35120	NA	mmu_retrop39519	NA	NA	NA	NA	NA
hsa_retrop21933	ptr_retrop03908	ggo_retrop01317	ppy_retrom08630	mmu_retrop19698	NA	NA	NA	NA	NA
hsa_retrom16215	ptr_retrop02797	ggo_retrop03421	ppy_retrom06293	mmu_retrom06282	NA	NA	NA	NA	NA
hsa_retrom03624	ptr_retrom10752	ggo_retrom04826	ppy_retrop18373	mmu_retrop40392	NA	NA	NA	NA	NA
hsairetrom26027	ptriretrom36775	ggo_retrom04111	ppy_retrom17105	NA	NA	NA	NA	NA	NA
hsa_retrom03627	ptr_retrom10755	NA	ppy_retrop18370	mmuiretrop39414	NA	NA	NA	NA	NA
hsa_retrop24526	ptriretrop42560	ggoiretrop13810	ppyiretrop21993	mmuiretrop12330	NA	NA	NA	NA	NA
hsa_retrom27319	ptr_retrom09405	ggo_retrom03940	ppy_retrop17846	NA	NA	NA	NA	NA	NA
hsa_retrop24523	ptr_retrop11437	ggo_retrop01657	ppy_retrop10883	NA	NA	NA	NA	NA	NA
hsa_retrop24521	ptr_retrop11435	ggoiretrop13153	ppy_retrop10882	mmuiretrop11362	NA	NA	NA	NA	NA
hsa_retrom31455	ptriretrop32234	ggo_retrop01085	ppyiretrom33928	mmu_retrom30474	NA	NA	NA	NA	NA
hsa_retrop37290	ptr_retrop08626	ggo_retrop03889	ppy_retrop16440	mmu_retrom26423	NA	NA	NA	NA	NA
hsa_retrop31948	NA	ggo_retrop04334	ppy_retrop17524	mmu_retrop33413	NA	NA	NA	NA	NA
hsa_retrom16030	ptriretrop09310	ggoiretrom08257	ppyiretrom10081	NA	NA	NA	NA	NA	NA
hsa_retrop34733	ptr_retrop09505	ggo_retrop03608	ppy_retrop17211	NA	NA	NA	NA	NA	NA
hsa_retrop03942	ptr_retrop10879	ggo_retrop04778	ppy_retrom17678	NA	NA	NA	NA	NA	NA
hsa_retrop30098	ptr_retrop10176	ggo_retrop04126	ppy_retrop18141	mmu_retrom34094	NA	NA	NA	NA	NA
hsa_retrom41695	ptriretrom25790	ggoiretrom22600	ppyiretrom28348	mmu_retrom23238	NA	NA	NA	NA	NA
hsa_retrop05652	NA	ggo_retrop02656	ppy_retrop10720	mmu_retrop17178	NA	NA	NA	NA	NA
hsa_retrom22594	ptr_retrom04183	ggoiretrom10482	ppy_retrop08904	mmuiretrom18511	NA	NA	NA	NA	NA
hsairetrop28636	ptriretrop35447	NA	ppy_retrop17585	mmu_retrop33633	NA	NA	NA	NA	NA
hsa_retrop34645	ptr_retrop09493	NA	ppyiretrop36818	mmu_retrop32212	NA	NA	NA	NA	NA
hsa_retrom30504	ptriretrom34902	ggo_retrom04369	ppy_retrom16325	mmu_retrom32458	NA	NA	NA	NA	NA
hsa_retrop29097	ptr_retrop09945	ggoiretrop30895	ppy_retrom16670	mmu_retrom33110	NA	NA	NA	NA	NA
hsa_retrom07189	ptr_retrom01454	ggo_retrom02287	ppy_retrop09594	NA	NA	NA	NA	NA	NA
hsa_retrom39116	ptr_retrom06131	ggo_retrom01567	NA	mmu_retrop13644	NA	NA	NA	NA	NA
hsa_retrom06122	ptriretrom16631	ggoiretrom16656	NA	NA	NA	NA	NA	NA	NA
hsa_retrom10537	ptr_retrom04450	ggo_retrom01325	NA	NA	NA	NA	NA	NA	NA
hsairetrop25092	ptriretrop36070	NA	ppyiretrom38028	mmu_retrop35662	NA	NA	NA	NA	NA
hsa_retrop05497	ptr_retrop05342	ggo_retrop02631	ppy_retrom10479	mmu_retrom14949	NA	NA	NA	NA	NA
hsa_retrom28333	ptr_retrom09591	ggo_retrom04031	ppy_retrom16545	NA	NA	NA	NA	NA	NA
hsa_retrop12508	ptriretrop12696	ggoiretrop07087	ppy_retrop07792	mmu_retrop29625	NA	NA	NA	NA	NA
hsa_retrop10657	ptr_retrop05712	ggo_retrop01973	ppy_retrop12564	mmu_retrop18744	NA	NA	NA	NA	NA
hsa_retrop33403	ptr_retrop08907	ggo_retrop03508	ppy_retrop16858	NA	NA	NA	NA	NA	NA
hsa_retrop10653	ptr_retrop05710	ggo_retrop01972	ppy_retrop12562	NA	NA	NA	NA	NA	NA
hsa_retrop11707	ptr_retrop04195	ggo_retrop01246	NA	NA	NA	NA	NA	NA	NA
hsa_retrop12505	ptriretrop12686	ggoiretrop06167	ppyiretrop14635	mmuiretrop25938	NA	NA	NA	NA	NA
hsa_retrop32458	ptr_retrop08669	ggo_retrom01234	ppy_retrop16499	mmu_retrop30428	NA	NA	NA	NA	NA
hsa_retrop40080	ptr_retrop06620	ggo_retrop02483	ppy_retrop13040	mmuiretrop21934	NA	NA	NA	NA	NA
hsa_retrom05363	ptr_retrom04521	ggo_retrom02120	ppy_retrop10117	mmu_retrop15725	mus_retrom91886	rno_retrom07159	mdo_retrom16003	NA	NA
hsairetrop21066	ptr_retrop03998	ggoiretrop10272	NA	NA	NA	NA	NA	NA	NA
hsa_retrom37647	ptr_retrom06663	ggoiretrom19316	ppyiretrom25881	NA	NA	NA	NA	NA	NA
hsa_retrop32566	ptr_retrom08903	ggo_retrom01207	NA	NA	NA	NA	NA	NA	NA
hsa_retrop13639	ptr_retrop03207	ggo_retrop00738	NA	mmu_retrop28289	NA	NA	NA	NA	NA
hsa_retrop04835	ptriretrop18269	ggoiretrop20866	ppy_retrop10472	NA	NA	NA	NA	NA	NA
hsa_retrop21551	ptr_retrop03838	ggo_retrop01269	NA	mmu_retrop19106	NA	NA	NA	NA	NA
hsa_retrom22602	ptr_retrom04188	ggo_retrom01455	ppy_retrop08899	mmu_retrom17879	NA	NA	NA	NA	NA
hsa_retrop01953	ptr_retrom10240	ggoiretrop35817	ppy_retrom18089	mmu_retrop39007	NA	NA	NA	NA	NA
hsa_retrop01952	ptr_retrom10242	ggoiretrop35816	ppy_retrom18101	mmu_retrop39003	NA	NA	NA	NA	NA
hsa_retrom17102	ptr_retrom02799	ggo_retrom00551	NA	mmu_retrom05779	NA	NA	NA	NA	NA
hsa_retrom17104	ptr_retrom02801	ggo_retrom00552	ppy_retrom07039	mmu_retrom05784	NA	NA	NA	NA	NA
hsa_retrop29547	ptr_retrop10073	ggoiretrop31548	ppyiretrom36903	mmu_retrop34006	NA	NA	NA	NA	NA
hsa_retrop40159	ptr_retrop06641	NA	ppy_retrop13071	mmu_retrop22872	NA	NA	NA	NA	NA
hsa_retrom36203	NA	ggoiretrom24971	ppy_retrop14231	mmu_retrop36377	NA	NA	NA	NA	NA
hsa_retrop08828	ptriretrop17740	ggo_retrop02305	ppyiretrop20041	mmu_retrop15983	NA	NA	NA	NA	NA
hsa_retrop40154	ptr_retrop06640	ggoiretrop19352	NA	NA	NA	NA	NA	NA	NA
hsa_retrop16087	ptriretrom09050	ggo_retrom03509	ppyiretrop10551	NA	NA	NA	NA	NA	NA
hsa_retrom09051	ptr_retrop05616	ggoiretrom14644	NA	NA	NA	NA	NA	NA	NA
hsa_retrom09052	ptriretrop20561	ggoiretrom14645	ppyiretrom24576	mmu_retrom16034	NA	NA	NA	NA	NA
hsa_retrop14201	ptriretrop11889	ggo_retrop00828	NA	mmuiretrop26604	NA	NA	NA	NA	NA
hsa_retrop30141	ptriretrop37874	ggo_retrop04134	ppy_retrop18160	mmu_retrom33969	NA	NA	NA	NA	NA
hsa_retrom28206	ptr_retrom09530	ggo_retrom04016	NA	NA	NA	NA	NA	NA	NA
hsa_retrom01587	ptr_retrop10579	ggo_retrom04609	NA	NA	NA	NA	NA	NA	NA
hsa_retrop23975	ptr_retrop04013	ggo_retrop01374	ppyiretrop15885	mmu_retrop20232	NA	NA	NA	NA	NA
hsa_retrop31616	ptr_retrop09674	ggo_retrop04296	ppy_retrop17447	mmu_retrop33199	NA	NA	NA	NA	NA
hsa_retrom09541	ptr_retrom05999	ggoiretrom14460	ppy_retrom12091	NA	NA	NA	NA	NA	NA
hsa_retrom32582	ptr_retrom07721	ggo_retrom03638	ppyiretrom31066	mmu_retrom24232	NA	NA	NA	NA	NA
hsa_retrop11641	ptriretrop15615	ggoiretrop09157	NA	mmu_retrop09683	NA	NA	NA	NA	NA
hsa_retrom02971	ptr_retrom10549	ggo_retrom04715	ppyiretrop41436	mmu_retrom38463	NA	NA	NA	NA	NA
hsa_retrop20411	ptriretrop07483	NA	ppy_retrop04637	mmu_retrop05851	NA	NA	NA	NA	NA
hsa_retrom37080	ptr_retrom07672	ggoiretrom24100	ppyiretrom30891	mmu_retrom35795	NA	NA	NA	NA	NA
hsa_retrop06877	ptr_retrop04596	ggo_retrop02129	ppy_retrom09425	mmu_retrom13077	NA	NA	NA	NA	NA
hsairetrop36830	ptriretrop24077	ggoiretrop19680	NA	mmu_retrop22767	NA	NA	NA	NA	NA
hsa_retrop37279	ptr_retrop08625	ggo_retrop03888	ppy_retrop16437	NA	NA	NA	NA	NA	NA
hsa_retrom01272	ptr_retrom10140	ggo_retrom04552	ppy_retrop19088	mmu_retrom36830	NA	NA	NA	NA	NA
hsa_retrom37241	ptriretrom28702	ggoiretrom25089	ppyiretrom31041	NA	NA	NA	NA	NA	NA
hsairetrop16158	ptriretrom08914	ggo_retrom03488	NA	mmu_retrop07727	NA	NA	NA	NA	NA
hsa_retrop09465	ptriretrop19854	ggo_retrop01803	NA	NA	NA	NA	NA	NA	NA
hsa_retrop17143	ptriretrop08027	ggoiretrop03939	ppy_retrop06993	mmuiretrop06050	NA	NA	NA	NA	NA
hsa_retrop40574	ptriretrop21617	ggo_retrop01428	ppyiretrom23134	mmu_retrom11763	NA	NA	NA	NA	NA
hsa_retrop32567	ptr_retrom08902	ggoiretrom08369	NA	mmu_retrop30535	NA	NA	NA	NA	NA
hsa_retrop32561	ptr_retrom08907	ggo_retrom01209	NA	NA	NA	NA	NA	NA	NA
hsa_retrop40570	ptr_retrop05810	ggo_retrop01424	ppy_retrom11332	mmu_retrom11769	NA	NA	NA	NA	NA
hsa_retrop05877	ptr_retrop05418	ggo_retrop02700	ppy_retrop10803	mmu_retrop17414	NA	NA	NA	NA	NA
hsa_retrop44095	ptr_retrop07077	ggoiretrop22294	ppy_retrop13897	NA	NA	NA	NA	NA	NA
hsa_retrop32569	ptriretrom32334	ggoiretrom08185	ppy_retrop16542	mmu_retrop30543	NA	NA	NA	NA	NA
hsa_retrom24914	ptriretrom41598	ggoiretrom13235	ppy_retrom10866	mmu_retrom09867	NA	NA	NA	NA	NA
hsa_retrom08528	ptr_retrom05404	ggo_retrom02484	NA	NA	NA	NA	NA	NA	NA
hsa_retrop06895	ptriretrop16708	ggoiretrop16747	ppyiretrom18302	mmuiretrom14638	NA	NA	NA	NA	NA
hsa_retrop25303	ptr_retrop02009	ggo_retrop00408	ppy_retrop04988	mmu_retrop10254	NA	NA	NA	NA	NA
hsa_retrom35107	ptr_retrom08543	ggo_retrom03869	ppy_retrom15308	mmu_retrop27717	NA	NA	NA	NA	NA
hsa_retrop06891	ptriretrop16699	ggoiretrop17590	ppyiretrom18316	NA	NA	NA	NA	NA	NA
hsa_retrom14697	ptr_retrom03524	ggo_retrom00861	ppy_retrom07405	mmu_retrom27650	NA	NA	NA	NA	NA
hsa_retrom22365	ptr_retrom04133	ggo_retrom01415	NA	mmu_retrom17609	NA	NA	NA	NA	NA
hsa_retrom22366	ptr_retrom04134	ggo_retrom01416	ppy_retrop08983	mmu_retrom17619	NA	NA	NA	NA	NA
hsa_retrom03629	ptr_retrom10757	ggo_retrom04828	ppy_retrop18366	mmu_retrop40387	mus_retrom125011	rno_retrom02258	NA	NA	NA
hsa_retrom31956	NA	NA	ppy_retrom15787	mmu_retrom30943	mus_retrom41426	rnoiretrop04347	NA	NA	NA
hsa_retrop13914	ptr_retrop03274	ggo_retrop00788	NA	mmu_retrop28611	NA	NA	NA	NA	NA
hsa_retrop37254	ptr_retrop08615	ggo_retrop03882	ppy_retrop16397	mmu_retrom26444	NA	NA	NA	NA	NA
hsa_retrom32696	ptr_retrom07759	ggo_retrom03654	ppy_retrom14136	mmu_retrom24348	NA	NA	NA	NA	NA
hsairetrom02428	ptr_retrom10509	ggoiretrom34999	ppyiretrop41626	mmu_retrop39357	NA	NA	NA	NA	NA
hsa_retrom14451	ptriretrom11394	ggo_retrom00806	ppy_retrom07292	NA	NA	NA	NA	NA	NA
hsa_retrom41250	ptr_retrop06847	ggoiretrop22125	NA	NA	NA	NA	NA	NA	NA
hsa_retrop03158	ptriretrop40383	ggo_retrop04646	ppy_retrom17989	mmu_retrop39175	NA	NA	NA	NA	NA
hsa_retrom26428	ptr_retrom01857	ggo_retrom00033	NA	mmu_retrop36036	NA	NA	NA	NA	NA
hsa_retrop33385	ptr_retrop08905	ggo_retrop03505	NA	mmu_retrop31661	NA	NA	NA	NA	NA
hsa_retrom01610	ptriretrop40036	ggo_retrom04611	NA	mmu_retrom37435	NA	NA	NA	NA	NA
hsa_retrop32705	ptr_retrom08861	ggo_retrom01175	ppy_retrop16627	mmu_retrop30816	NA	NA	NA	NA	NA
hsa_retrop37823	ptriretrop27084	ggo_retrop03040	ppyiretrom29955	mmuiretrom33737	NA	NA	NA	NA	NA
hsa_retrop22011	ptr_retrop03923	ggoiretrop09766	ppy_retrom08585	mmu_retrop19777	NA	NA	NA	NA	NA
hsairetrop15203	ptriretrop10606	ggoiretrop04823	ppyiretrop12004	mmuiretrop08353	NA	NA	NA	NA	NA
hsa_retrom01128	ptr_retrom10118	ggoiretrom34757	ppy_retrop19112	NA	NA	NA	NA	NA	NA
hsa_retrom34691	ptr_retrom08427	ggo_retrom03800	ppy_retrom15114	mmu_retrom26048	NA	NA	NA	NA	NA
hsa_retrop36923	ptr_retrop08537	NA	ppy_retrop16246	mmu_retrop27383	NA	NA	NA	NA	NA
hsa_retrop00331	ptr_retrop10316	ggo_retrop04451	NA	mmu_retrop37992	NA	NA	NA	NA	NA
hsa_retrom34695	ptriretrom30180	ggo_retrom03801	ppy_retrom15116	NA	NA	NA	NA	NA	NA
hsa_retrom35363	ptr_retrom08603	ggo_retrom03907	NA	NA	NA	NA	NA	NA	NA
hsa_retrom24357	ptriretrom14801	ggoiretrom10534	ppyiretrom15828	mmuiretrom18749	NA	NA	NA	NA	NA
hsa_retrop41598	ptr_retrop06046	ggo_retrop01551	ppy_retrop11644	mmu_retrom11322	NA	NA	NA	NA	NA
hsa_retrom40470	ptr_retrom06528	ggo_retrom01695	ppy_retrom11541	mmu_retrop12915	NA	NA	NA	NA	NA
hsairetrom06234	ptriretrom16847	ggoiretrom17555	ppy_retrop09644	mmuiretrop15675	NA	NA	NA	NA	NA
hsa_retrom15674	ptr_retrom02836	ggo_retrom01092	NA	mmu_retrom05900	NA	NA	NA	NA	NA
hsa_retrop02797	ptriretrom39020	ggoiretrop35865	ppyiretrop42100	mmuiretrop38684	NA	NA	NA	NA	NA
hsa_retrop31435	ptr_retrom09181	ggoiretrop33578	ppyiretrom35407	mmu_retrom31871	NA	NA	NA	NA	NA
hsa_retrop16723	ptr_retrop02897	ggo_retrom03400	ppy_retrop06394	mmu_retrop08283	NA	NA	NA	NA	NA
hsa_retrom10940	ptr_retrom03649	ggo_retrom00890	ppy_retrom07520	mmuiretrom25896	NA	NA	NA	NA	NA
hsa_retrop00208	ptr_retrop10290	ggoiretrop34729	ppy_retrom18657	mmu_retrop37896	NA	NA	NA	NA	NA
hsa_retrom14210	ptr_retrom03405	ggo_retrom00760	ppy_retrom07201	mmuiretrom24870	NA	NA	NA	NA	NA
hsa_retrom14213	ptr_retrom03406	ggoiretrom05658	ppy_retrom07204	mmu_retrom26983	NA	NA	NA	NA	NA
hsa_retrop03563	ptr_retrop10793	ggo_retrop04705	NA	mmu_retrop40083	NA	NA	NA	NA	NA
hsa_retrom01058	ptr_retrom10098	ggo_retrom04529	NA	NA	NA	NA	NA	NA	NA
hsa_retrop32636	ptriretrom32190	ggo_retrom01186	ppy_retrop16579	mmu_retrop30695	NA	NA	NA	NA	NA
hsa_retrop43367	ptr_retrop06877	ggoiretrop21585	ppy_retrop13639	mmu_retrop24152	NA	NA	NA	NA	NA
hsa_retrop01557	ptr_retrop10459	ggo_retrop04535	NA	NA	NA	NA	NA	NA	NA
hsa_retrop01553	ptr_retrop10458	ggo_retrop04534	NA	NA	NA	NA	NA	NA	NA
hsa_retrom30082	ptr_retrom09249	ggoiretrom32349	ppy_retrom16217	mmu_retrom32158	NA	NA	NA	NA	NA
hsa_retrop00537	ptr_retrop10364	ggo_retrop04472	ppy_retrom18554	mmu_retrop38121	NA	NA	NA	NA	NA
hsa_retrop43993	ptr_retrop07041	ggo_retrop02901	NA	NA	NA	NA	NA	NA	NA
hsa_retrom30086	ptr_retrom09250	ggoiretrom32774	ppyiretrom35948	mmu_retrom32168	NA	NA	NA	NA	NA
hsa_retrop13689	ptr_retrop03225	ggo_retrop00748	ppy_retrop07212	mmu_retrop28342	NA	NA	NA	NA	NA
hsa_retrop34889	ptriretrop29346	ggo_retrop03637	NA	mmu_retrop25567	NA	NA	NA	NA	NA
hsa_retrop18242	ptriretrop06556	ggo_retrop00234	NA	mmuiretrop03386	NA	NA	NA	NA	NA
hsa_retrop41621	ptr_retrop06053	ggo_retrop01552	ppy_retrop11655	mmu_retrom11317	NA	NA	NA	NA	NA
hsa_retrom18796	ptr_retrom02515	ggo_retrom00249	NA	NA	NA	NA	NA	NA	NA
hsairetrop30985	ptriretrop33749	ggo_retrop03585	ppyiretrop36630	mmuiretrop29467	NA	NA	NA	NA	NA
hsa_retrom18790	ptr_retrom02513	ggo_retrom00248	ppy_retrom03820	mmu_retrom03545	NA	NA	NA	NA	NA
hsa_retrop16893	ptr_retrom02742	ggo_retrop00495	ppy_retrom06927	mmu_retrom05423	NA	NA	NA	NA	NA
hsa_retrop36642	ptr_retrop08443	ggo_retrop03782	ppy_retrop16148	mmu_retrop27047	NA	NA	NA	NA	NA
hsa_retrom28937	ptr_retrom09791	ggo_retrom04126	ppy_retrom17135	NA	NA	NA	NA	NA	NA
hsa_retrom25356	ptr_retrom11180	ggo_retrom01854	NA	NA	NA	NA	NA	NA	NA
hsa_retrom10595	ptr_retrom04469	ggo_retrom01337	ppy_retrom09134	mmu_retrom08368	NA	NA	NA	NA	NA
hsa_retrom35902	NA	ggoiretrom24440	ppy_retrop14331	mmu_retrop36558	NA	NA	NA	NA	NA
hsa_retrop31544	ptriretrom33755	ggo_retrop04284	ppy_retrop17423	NA	NA	NA	NA	NA	NA
hsa_retrop31542	ptr_retrom09157	ggo_retrop04283	ppy_retrop17420	mmu_retrom31774	NA	NA	NA	NA	NA
hsa_retrop15168	ptr_retrop03062	ggo_retrop00625	ppy_retrop06642	NA	NA	NA	NA	NA	NA
hsa_retrop42826	ptr_retrop06802	ggo_retrop02765	ppy_retrop13432	NA	NA	NA	NA	NA	NA
hsa_retrom19225	ptr_retrom02554	ggo_retrom00283	ppy_retrom04007	NA	NA	NA	NA	NA	NA
hsa_retrop16037	ptr_retrop00665	ggo_retrom03522	ppyiretrop10479	NA	NA	NA	NA	NA	NA
hsa_retrop42822	ptr_retrop06799	ggoiretrop22088	ppyiretrop28424	NA	NA	NA	NA	NA	NA
hsa_retrom14678	ptr_retrom03520	ggo_retrom00857	ppy_retrom07390	mmu_retrom27635	NA	NA	NA	NA	NA
hsa_retrop43533	ptr_retrop06909	ggoiretrop21598	ppy_retrop13692	NA	NA	NA	NA	NA	NA
hsairetrop32554	ptriretrop30500	ggo_retrop03759	ppy_retrop16059	NA	NA	NA	NA	NA	NA
hsa_retrom14673	ptr_retrom03516	ggo_retrom00856	ppy_retrom07386	NA	NA	NA	NA	NA	NA
hsa_retrop28202	ptr_retrop09874	ggo_retrop03943	ppy_retrom16971	mmu_retrop35778	NA	NA	NA	NA	NA
hsa_retrop43662	ptr_retrop06933	ggo_retrop02850	ppy_retrop13730	mmu_retrop24445	NA	NA	NA	NA	NA
hsa_retrop42933	ptriretrop25176	ggoiretrop21774	ppy_retrop13477	NA	NA	NA	NA	NA	NA
hsairetrom26677	NA	ggoiretrom33050	ppyiretrom35071	mmu_retrop37749	NA	NA	NA	NA	NA
hsa_retrop43665	ptr_retrop06936	ggoiretrop22518	ppy_retrop13735	NA	NA	NA	NA	NA	NA
hsa_retrom11084	ptriretrom12258	ggo_retrom00906	ppy_retrom07577	mmu_retrom28418	NA	NA	NA	NA	NA
hsairetrom16963	ptriretrop07806	ggo_retrom00475	ppy_retrop06923	NA	NA	NA	NA	NA	NA
hsa_retrom15096	ptriretrom10087	ggoiretrom04923	ppyiretrom11492	mmuiretrom07436	NA	NA	NA	NA	NA
hsa_retrop36736	ptriretrop30785	ggo_retrop03794	NA	NA	NA	NA	NA	NA	NA
hsa_retrom35342	NA	ggo_retrom03902	ppy_retrom15383	mmu_retrop27523	NA	NA	NA	NA	NA
hsa_retrop39709	ptr_retrop06531	ggo_retrop02426	ppyiretrop27062	NA	NA	NA	NA	NA	NA
hsa_retrop39701	ptr_retrop06526	ggoiretrop19241	NA	mmu_retrop22489	NA	NA	NA	NA	NA
hsairetrom32949	ptriretrom27043	ggoiretrom24155	ppy_retrop14393	mmuiretrop35155	NA	NA	NA	NA	NA
hsa_retrop39702	ptr_retrop06527	ggoiretrop19468	ppy_retrop12821	mmu_retrop22490	NA	NA	NA	NA	NA
hsa_retrop40274	ptr_retrop06663	ggo_retrop02512	NA	NA	NA	NA	NA	NA	NA
hsa_retrop14167	ptr_retrop03317	ggoiretrop05464	NA	mmuiretrop26594	NA	NA	NA	NA	NA
hsa_retrop28979	ptr_retrop09926	ggoiretrop31429	ppy_retrom16714	NA	NA	NA	NA	NA	NA
hsa_retrom36111	ptr_retrom07497	ggo_retrom03247	ppy_retrop14277	NA	NA	NA	NA	NA	NA
hsa_retrop11283	ptr_retrop01592	ggo_retrop01195	ppy_retrop09220	NA	NA	NA	NA	NA	NA
hsa_retrop24068	ptr_retrop04025	ggo_retrop01384	ppy_retrop08219	mmu_retrop20311	NA	NA	NA	NA	NA
hsa_retrom28841	ptr_retrom09761	ggo_retrom04104	ppy_retrom17091	mmu_retrop35403	NA	NA	NA	NA	NA
hsa_retrom31840	NA	ggoiretrom26342	ppy_retrom15747	mmuiretrom27643	NA	NA	NA	NA	NA
hsa_retrop03440	ptr_retrop10763	ggo_retrop04682	ppy_retrom17874	NA	NA	NA	NA	NA	NA
hsa_retrom35833	ptriretrom27158	ggoiretrom24020	ppyiretrop30714	NA	NA	NA	NA	NA	NA
hsa_retrom34525	ptr_retrom08390	ggo_retrom03775	ppy_retrom15061	mmu_retrom25906	mus_retrom43546	rno_retrop02493	NA	NA	NA
hsa_retrop09783	ptr_retrom05957	ggo_retrop01841	ppy_retrop12224	mmu_retrop17912	NA	NA	NA	NA	NA
hsa_retrop18399	ptr_retrop02326	ggo_retrop00253	ppy_retrop03817	mmu_retrop04582	NA	NA	NA	NA	NA
hsa_retrop38760	ptr_retrop07463	NA	ppy_retrop14639	mmu_retrop37292	NA	NA	NA	NA	NA
hsa_retrop15948	ptr_retrom03081	ggo_retrop01054	ppy_retrop06104	mmu_retrop07246	NA	NA	NA	NA	NA
hsairetrop34090	ptriretrop26865	ggoiretrop25656	ppyiretrom30180	mmuiretrom34280	NA	NA	NA	NA	NA
hsa_retrop09368	ptriretrop19719	ggoiretrop15303	ppyiretrop24708	mmuiretrop19429	NA	NA	NA	NA	NA
hsa_retrop28377	ptr_retrop09903	ggoiretrop31395	ppyiretrom37793	mmu_retrom33703	NA	NA	NA	NA	NA
hsa_retrop06781	ptr_retrop04579	ggo_retrop02114	NA	mmu_retrom13182	NA	NA	NA	NA	NA
hsa_retrop24087	ptr_retrop04027	ggoiretrop10183	ppy_retrop08223	mmu_retrop20317	NA	NA	NA	NA	NA
hsa_retrom07183	ptr_retrom01451	ggo_retrom02285	ppy_retrop09607	mmu_retrop14265	NA	NA	NA	NA	NA
hsa_retrom16689	ptriretrom09574	ggo_retrop03312	ppy_retrom06503	mmu_retrom06719	NA	NA	NA	NA	NA
hsa_retrom28223	ptr_retrom09537	ggo_retrom04017	ppy_retrop17889	mmu_retrop34322	NA	NA	NA	NA	NA
hsa_retrom30469	ptriretrom34871	NA	ppyiretrom36338	NA	mus_retrop73764	rno_retrom00957	NA	NA	NA
hsa_retrop43263	ptr_retrop06856	ggo_retrop02796	ppy_retrop13611	mmu_retrop24053	NA	NA	NA	NA	NA
hsa_retrop31133	ptr_retrop09574	ggo_retrop04200	ppy_retrop17264	NA	NA	NA	NA	NA	NA
hsa_retrop43260	NA	ggo_retrop02794	ppy_retrop13607	mmu_retrop24033	NA	NA	NA	NA	NA
hsairetrop25957	ptriretrop36921	ggoiretrop31891	NA	mmuiretrop34320	NA	NA	NA	NA	NA
hsa_retrom16519	ptr_retrom03088	ggo_retrop03344	ppy_retrop06243	mmu_retrom06385	NA	NA	NA	NA	NA
hsa_retrop05274	ptriretrop18657	ggo_retrop02600	ppy_retrom10556	NA	NA	NA	NA	NA	NA
hsa_retrom31598	ptr_retrop08711	ggo_retrom03524	NA	NA	NA	NA	NA	NA	NA
hsa_retrop39262	ptr_retrop07634	ggoiretrop23803	ppyiretrop32341	mmu_retrop37727	NA	NA	NA	NA	NA
hsa_retrop39146	ptr_retrop07600	ggoiretrop25379	NA	mmu_retrop37636	NA	NA	NA	NA	NA
hsa_retrop14013	ptr_retrop03297	ggo_retrop00811	ppy_retrop07357	mmu_retrom27486	NA	NA	NA	NA	NA
hsa_retrom00231	ptr_retrom09934	ggoiretrom34607	NA	NA	NA	NA	NA	NA	NA
hsa_retrom00984	ptr_retrom10075	ggoiretrom34731	ppy_retrop19173	mmu_retrom36647	NA	NA	NA	NA	NA
hsa_retrom29306	ptr_retrom09876	ggo_retrom04174	ppyiretrom38869	mmuiretrom31321	NA	NA	NA	NA	NA
hsa_retrop05278	ptriretrop18662	NA	ppy_retrom10555	mmu_retrom15144	NA	NA	NA	NA	NA
hsa_retrom31608	ptr_retrop08706	ggo_retrom03525	NA	mmu_retrom30580	NA	NA	NA	NA	NA
hsa_retrom04012	ptr_retrom05426	ggoiretrom20997	ppy_retrom10310	mmu_retrom14412	NA	NA	NA	NA	NA
hsa_retrop27682	ptr_retrop01920	ggo_retrop00140	NA	NA	NA	NA	NA	NA	NA
hsa_retrom11314	ptriretrom12545	ggoiretrom06702	ppy_retrom07669	mmu_retrom28736	NA	NA	NA	NA	NA
hsa_retrop12862	ptr_retrop03735	ggo_retrop00954	NA	NA	NA	NA	NA	NA	NA
hsa_retrop29933	ptr_retrop10149	ggo_retrop04105	ppy_retrop18098	mmu_retrom34253	NA	NA	NA	NA	NA
hsa_retrop29936	ptr_retrop10151	ggo_retrop04106	ppy_retrop18102	mmu_retrom34238	NA	NA	NA	NA	NA
hsa_retrom16336	ptriretrop08896	ggo_retrop03396	ppy_retrop06316	mmu_retrom06516	NA	NA	NA	NA	NA
hsa_retrop32051	ptriretrop35469	ggo_retrop04363	ppyiretrop38162	NA	NA	NA	NA	NA	NA
hsa_retrop09214	ptriretrop19565	ggoiretrop15775	ppyiretrop24555	NA	NA	NA	NA	NA	NA
hsa_retrop13757	ptr_retrop03241	ggo_retrop00764	ppy_retrop07250	mmu_retrop28432	NA	NA	NA	NA	NA
hsa_retrom11424	ptr_retrom03757	ggo_retrom00957	ppy_retrom07732	NA	NA	NA	NA	NA	NA
hsa_retrom09616	ptr_retrom06023	ggo_retrom02045	ppy_retrom12112	NA	NA	NA	NA	NA	NA
hsa_retrom31027	ptr_retrop08802	ggoiretrop07936	ppy_retrom15524	mmuiretrom27518	NA	NA	NA	NA	NA
hsa_retrop29154	ptr_retrop09967	ggoiretrop31126	NA	mmu_retrom32982	NA	NA	NA	NA	NA
hsa_retrop43385	ptriretrop25396	ggoiretrop22157	NA	NA	NA	NA	NA	NA	NA
hsa_retrom24803	ptr_retrom11023	ggo_retrom01771	ppy_retrom10830	NA	NA	NA	NA	NA	NA
hsa_retrom14945	NA	ggo_retrom00599	ppy_retrom06635	mmu_retrom06970	NA	NA	NA	NA	NA
hsa_retrom37865	ptr_retrom06719	ggo_retrom02571	ppy_retrom12377	NA	NA	NA	NA	NA	NA
hsa_retrop10715	ptriretrop21153	ggo_retrop01982	ppyiretrop26256	mmu_retrop18767	NA	NA	NA	NA	NA
hsa_retrop25608	ptr_retrop02050	ggo_retrop00437	ppy_retrop05166	mmu_retrom08735	NA	NA	NA	NA	NA
hsa_retrop42310	ptriretrop22963	ggoiretrop11584	ppyiretrop24376	NA	NA	NA	NA	NA	NA
hsa_retrop42740	ptr_retrop06781	ggo_retrop02748	ppy_retrop13396	mmu_retrop23663	NA	NA	NA	NA	NA
hsa_retrom34833	ptr_retrom08464	ggo_retrom03827	ppy_retrom15158	mmu_retrom26175	NA	NA	NA	NA	NA
hsa_retrom42328	ptr_retrom07217	ggo_retrom03076	ppy_retrom13293	NA	NA	NA	NA	NA	NA
hsa_retrop06657	ptriretrop16408	ggoiretrop16056	ppyiretrom18606	NA	NA	NA	NA	NA	NA
hsa_retrop11662	ptr_retrop04188	ggoiretrop09167	ppyiretrop17863	mmuiretrop09272	NA	NA	NA	NA	NA
hsa_retrop11664	ptr_retrop04189	ggoiretrop09168	NA	mmu_retrop09744	NA	NA	NA	NA	NA
hsa_retrom03188	ptriretrom40314	ggoiretrom35079	ppyiretrop41111	mmu_retrop39635	NA	NA	NA	NA	NA
hsa_retrop24534	ptr_retrop11441	ggo_retrop01659	ppy_retrop10888	NA	NA	NA	NA	NA	NA
hsa_retrop18730	ptr_retrom02535	ggoiretrop02417	ppyiretrop07224	mmu_retrop04922	NA	NA	NA	NA	NA
hsairetrom30547	ptriretrom29195	NA	ppyiretrom31415	mmuiretrom23007	NA	NA	NA	NA	NA
hsa_retrom03180	ptr_retrom10601	ggo_retrom04746	ppyiretrop41123	mmu_retrop39653	NA	NA	NA	NA	NA
hsa_retrop04949	ptriretrop18431	ggoiretrop20501	NA	mmu_retrop16524	NA	NA	NA	NA	NA
hsairetrop40982	ptr_retrop07076	ggoiretrop23196	ppy_retrop13896	mmu_retrop24890	NA	NA	NA	NA	NA
hsa_retrop29849	ptr_retrop10135	ggo_retrop04098	ppy_retrop18066	mmu_retrom34296	NA	NA	NA	NA	NA
hsa_retrop25503	ptriretrop05594	ggo_retrop00417	ppyiretrop08464	mmu_retrop10339	mus_retrop112192	rnoiretrop34937	NA	NA	NA
hsa_retrom27453	ptr_retrom09446	ggo_retrom03958	ppyiretrop39658	mmu_retrom34358	NA	NA	NA	NA	NA
hsairetrop25175	ptriretrop36156	ggoiretrop32393	ppyiretrom37959	NA	NA	NA	NA	NA	NA
hsa_retrom42289	ptr_retrom07212	ggo_retrom03074	ppy_retrom13289	NA	NA	NA	NA	NA	NA
hsa_retrop38095	ptr_retrop07346	ggo_retrop03113	ppyiretrom29723	NA	NA	NA	NA	NA	NA
hsa_retrop05661	ptriretrop19122	ggo_retrop02657	ppyiretrop21393	NA	NA	NA	NA	NA	NA
hsa_retrom31339	ptriretrop32352	ggo_retrop01102	ppy_retrom15620	mmu_retrom30357	NA	NA	NA	NA	NA
hsa_retrom38406	ptr_retrom06851	ggo_retrom02684	NA	NA	NA	NA	NA	NA	NA
hsa_retrop40762	ptr_retrop05891	ggo_retrop01458	NA	mmu_retrom11445	NA	NA	NA	NA	NA
hsa_retrom36473	ptr_retrom07592	ggo_retrom03295	ppyiretrom29508	NA	NA	NA	NA	NA	NA
hsa_retrom31332	ptriretrop32355	ggo_retrop01103	ppy_retrom15616	mmu_retrom30348	NA	NA	NA	NA	NA
hsa_retrom27588	ptr_retrom09484	NA	ppyiretrop39476	mmu_retrop34857	NA	NA	NA	NA	NA
hsa_retrom26857	ptr_retrom01951	ggo_retrom00087	ppy_retrom02752	mmu_retrom09311	NA	NA	NA	NA	NA
hsa_retrom27581	ptriretrom35496	ggoiretrom30623	ppy_retrop17992	mmuiretrop33819	NA	NA	NA	NA	NA
hsa_retrom40450	ptriretrom22865	ggoiretrom11667	ppy_retrom11527	mmu_retrop12937	NA	NA	NA	NA	NA
hsa_retrom09607	ptriretrom21329	ggoiretrom15887	ppyiretrom25276	NA	NA	NA	NA	NA	NA
hsa_retrop10623	ptr_retrop05699	ggoiretrop14031	ppy_retrop12557	mmuiretrop18799	NA	NA	NA	NA	NA
hsa_retrop10622	ptriretrop20985	ggo_retrop01964	ppy_retrop12556	mmu_retrop18720	NA	NA	NA	NA	NA
hsa_retrom37870	ptr_retrom06723	ggo_retrom02574	ppy_retrom12381	mmu_retrom21079	NA	NA	NA	NA	NA
hsa_retrop12530	ptriretrop12737	ggoiretrop06624	ppy_retrop07801	mmu_retrop29648	NA	NA	NA	NA	NA
hsa_retrop35829	ptr_retrop08198	ggo_retrop03693	ppy_retrop15734	NA	NA	NA	NA	NA	NA
hsa_retrom09969	ptr_retrom04318	NA	ppyiretrom16752	mmu_retrop09215	NA	NA	NA	NA	NA
hsa_retrop30135	ptr_retrop10188	ggo_retrop04133	ppy_retrop18152	NA	NA	NA	NA	NA	NA
hsa_retrop30391	ptr_retrop10243	ggo_retrop04173	ppy_retrop18241	NA	NA	NA	NA	NA	NA
hsa_retrom03764	ptriretrom41035	ggoiretrom34084	ppyiretrop40464	mmuiretrop38950	NA	NA	NA	NA	NA
hsa_retrom37659	ptr_retrom06667	ggo_retrom02533	ppyiretrom25921	mmu_retrom20799	NA	NA	NA	NA	NA
hsa_retrop03728	ptr_retrop10830	ggo_retrop04734	ppy_retrom17759	mmu_retrom38211	NA	NA	NA	NA	NA
hsairetrop21077	ptr_retrop04000	ggo_retrop01362	ppyiretrop15798	mmuiretrop20924	mus_retrop113049	rno_retrop02522	mdoiretrom04110	NA	ggairetrom06696
hsa_retrom37656	ptriretrom23410	ggo_retrom02532	ppyiretrom25908	mmu_retrom20798	NA	NA	NA	NA	NA
hsa_retrop38685	ptr_retrop07440	ggo_retrop03183	ppy_retrop14587	mmu_retrop37197	NA	NA	NA	NA	NA
hsa_retrop03847	ptriretrop41340	ggo_retrop04762	ppy_retrom17708	mmu_retrom38046	NA	NA	NA	NA	NA
hsa_retrom39370	ptriretrom22151	ggoiretrom11557	ppy_retrop11252	NA	NA	NA	NA	NA	NA
hsa_retrom37897	ptr_retrom06729	ggoiretrom20545	ppy_retrom12390	mmu_retrom21117	NA	NA	NA	NA	NA
hsa_retrom17138	ptr_retrom02810	ggo_retrom00558	NA	NA	NA	NA	NA	NA	NA
hsa_retrop01946	ptr_retrom10247	ggo_retrop04593	ppy_retrom18103	NA	NA	NA	NA	NA	NA
hsa_retrop03332	ptr_retrop10762	ggo_retrop04679	ppy_retrom17903	mmu_retrop39354	NA	NA	NA	NA	NA
hsa_retrop40922	ptriretrop22039	ggo_retrop01476	ppyiretrom22770	mmu_retrom11383	NA	NA	NA	NA	NA
hsa_retrop37770	ptr_retrop07242	ggo_retrop03024	ppy_retrom13763	NA	NA	NA	NA	NA	NA
hsairetrop13867	ptr_retrop03262	ggoiretrop05707	ppy_retrop07287	mmu_retrop28517	NA	NA	NA	NA	NA
hsa_retrom26203	ptriretrom05971	ggo_retrom00444	NA	NA	NA	NA	NA	NA	NA
hsa_retrom21678	ptr_retrom02648	ggoiretrom01652	ppyiretrop08191	NA	NA	NA	NA	NA	NA
hsa_retrom27292	ptr_retrom02037	ggoiretrom01030	ppyiretrom05370	mmu_retrom09670	NA	NA	NA	NA	NA
hsa_retrom09732	ptr_retrom06058	ggo_retrom02066	ppy_retrom12152	mmu_retrom16816	NA	NA	NA	NA	NA
hsa_retrom27290	ptr_retrom02036	ggo_retrom00149	ppy_retrom02887	mmuiretrom09390	NA	NA	NA	NA	NA
hsa_retrop10536	ptriretrop20845	ggo_retrop01945	ppy_retrop12518	mmu_retrop18502	NA	NA	NA	NA	NA
hsa_retrop30175	ptriretrop37916	ggo_retrop04142	NA	NA	NA	NA	NA	NA	NA
hsa_retrop10532	ptr_retrop05677	ggo_retrop01944	NA	NA	NA	NA	NA	NA	NA
hsa_retrom30384	ptr_retrom09330	ggoiretrom32842	ppy_retrom16285	mmuiretrom29464	NA	NA	NA	NA	NA
hsa_retrom22513	ptr_retrom04172	ggo_retrom01444	ppy_retrop08907	NA	NA	NA	NA	NA	NA
hsa_retrop33155	ptriretrop32801	ggoiretrop26596	ppyiretrop35678	NA	NA	NA	NA	NA	NA
hsa_retrom09559	ptr_retrom06004	ggo_retrom02031	ppy_retrom12095	NA	NA	NA	NA	NA	NA
hsa_retrom25986	ptr_retrom02141	ggo_retrom00420	ppy_retrom05086	NA	NA	NA	NA	NA	NA
hsa_retrom09550	ptr_retrom06003	ggoiretrom14277	NA	NA	NA	NA	NA	NA	NA
hsa_retrop31605	ptr_retrop09672	ggoiretrop34628	ppy_retrop17443	mmu_retrop33183	NA	NA	NA	NA	NA
hsa_retrop40180	ptr_retrop06647	ggoiretrop19359	ppy_retrop13080	NA	NA	NA	NA	NA	NA
hsa_retrom26504	ptr_retrom01889	ggo_retrom00056	ppy_retrom02972	mmu_retrop35968	NA	NA	NA	NA	NA
hsairetrom24922	ptriretrom35519	ggo_retrom03983	ppyiretrop39469	mmuiretrop33815	NA	NA	NA	NA	NA
hsa_retrom02964	ptriretrom39968	ggoiretrom35028	ppy_retrop18650	mmu_retrom38459	NA	NA	NA	NA	NA
hsairetrom35214	ptriretrom23636	ggoiretrom19886	ppyiretrom26129	mmu_retrom20966	NA	NA	NA	NA	NA
hsa_retrom02969	ptr_retrom10548	ggo_retrom04713	ppy_retrop18646	NA	NA	NA	NA	NA	NA
hsa_retrop12663	ptr_retrop03674	ggo_retrop00920	ppy_retrop07860	NA	NA	NA	NA	NA	NA
hsa_retrom27210	ptriretrom05050	ggo_retrom00137	ppy_retrom02856	mmu_retrom09603	mus_retrom46474	rnoiretrom24409	NA	NA	NA
hsa_retrop37467	ptr_retrop07200	ggo_retrop02995	ppy_retrop14131	NA	NA	NA	NA	NA	NA
hsa_retrop16540	ptr_retrop02846	ggoiretrom26155	ppy_retrom06366	mmu_retrop07881	NA	NA	NA	NA	NA
hsa_retrop32968	ptriretrom31750	ggo_retrom01125	ppy_retrop16701	mmu_retrop31182	NA	NA	NA	NA	NA
hsa_retrop38771	ptr_retrop07464	ggo_retrop03205	ppy_retrop14641	mmu_retrop37294	NA	NA	NA	NA	NA
hsairetrop33733	ptriretrop31729	NA	ppyiretrop34729	mmuiretrom23545	NA	NA	NA	NA	NA
hsa_retrop08961	ptr_retrop05080	NA	ppy_retrop10290	mmu_retrop16125	NA	NA	NA	NA	NA
hsa_retrom32114	ptr_retrom09001	ggo_retrom03594	ppy_retrom15884	mmu_retrom31130	NA	NA	NA	NA	NA
hsa_retrop05841	ptr_retrop05414	ggoiretrop20437	ppy_retrop10794	mmu_retrop17392	NA	NA	NA	NA	NA
hsa_retrom36300	ptriretrom27927	ggo_retrom03282	NA	mmu_retrop36881	NA	NA	NA	NA	NA
hsa_retrop32551	ptr_retrom08908	ggoiretrom08189	NA	NA	NA	NA	NA	NA	NA
hsa_retrop25308	ptr_retrop02010	ggo_retrop00409	ppy_retrop04990	mmu_retrop10255	NA	NA	NA	NA	NA
hsa_retrop05689	ptr_retrop05383	ggo_retrop02667	ppy_retrop10734	mmu_retrop17210	NA	NA	NA	NA	NA
hsa_retrom22172	ptr_retrom04087	ggo_retrom01376	ppy_retrop09066	NA	NA	NA	NA	NA	NA
hsa_retrom09136	ptriretrop20471	ggo_retrom01977	ppy_retrom11966	mmu_retrom16116	NA	NA	NA	NA	NA
hsa_retrop37919	ptr_retrop07284	ggo_retrop03074	ppy_retrop14308	mmu_retrop36525	NA	NA	NA	NA	NA
hsa_retrop05680	ptriretrop19169	NA	ppy_retrop10730	mmu_retrop17196	NA	NA	NA	NA	NA
hsa_retrop29114	ptr_retrop09949	ggo_retrop03999	ppy_retrom16666	mmu_retrom33094	NA	NA	NA	NA	NA
hsairetrop21138	ptriretrop14802	ggo_retrop01370	ppy_retrop08197	mmu_retrop20225	NA	NA	NA	NA	NA
hsa_retrop13925	ptr_retrop03276	ggo_retrop00791	ppy_retrop07315	mmu_retrop28617	NA	NA	NA	NA	NA
hsa_retrom25746	ptriretrom05367	ggoiretrom02446	ppyiretrom07637	mmuiretrom09665	NA	NA	NA	NA	NA
hsa_retrom32684	ptr_retrom07757	ggo_retrom03651	ppy_retrom14134	NA	NA	NA	NA	NA	NA
hsa_retrop41295	ptr_retrop05979	ggoiretrop11475	ppy_retrop11534	NA	NA	NA	NA	NA	NA
hsa_retrom14685	ptriretrom11796	ggoiretrom05224	ppy_retrom07399	mmu_retrom27646	NA	NA	NA	NA	NA
hsa_retrom41089	ptr_retrom06986	ggo_retrom02935	ppy_retrom12889	mmu_retrom22831	NA	NA	NA	NA	NA
hsa_retrop03142	ptriretrop40369	ggoiretrop35907	NA	mmuiretrop38713	NA	NA	NA	NA	NA
hsa_retrom25748	ptr_retrom02069	ggo_retrom00364	ppy_retrom04967	mmu_retrom08927	NA	NA	NA	NA	NA
hsa_retrom14111	ptriretrom10931	ggo_retrom00749	ppy_retrom07153	NA	NA	NA	NA	NA	NA
hsa_retrom14442	ptr_retrom03456	ggo_retrom00805	ppy_retrom07287	NA	NA	NA	NA	NA	NA
hsa_retrop32735	ptriretrom32012	ggo_retrom01163	ppy_retrop16642	mmuiretrop29222	NA	NA	NA	NA	NA
hsa_retrop32730	ptr_retrom08847	ggo_retrom01165	ppy_retrop16637	NA	NA	NA	NA	NA	NA
hsa_retrop12484	ptr_retrop03628	ggoiretrop07324	ppyiretrop14597	mmu_retrop29567	NA	NA	NA	NA	NA
hsa_retrom01601	ptriretrop40040	ggo_retrom04610	ppyiretrop42201	NA	NA	NA	NA	NA	NA
hsa_retrop41567	ptr_retrop06037	ggo_retrop01545	NA	NA	NA	NA	NA	NA	NA
hsa_retrop33393	ptr_retrop08906	ggo_retrop03507	ppyiretrop36021	NA	NA	NA	NA	NA	NA
hsa_retrom32750	ptr_retrom07778	NA	ppyiretrom31282	mmuiretrom22293	NA	NA	NA	NA	NA
hsa_retrop40216	ptr_retrop06649	ggo_retrop02505	ppy_retrop13082	mmu_retrop22903	NA	NA	NA	NA	NA
hsa_retrom32206	ptriretrom33096	ggo_retrom03609	ppyiretrom34791	mmu_retrom31219	NA	NA	NA	NA	NA
hsairetrom08831	ptr_retrop05636	ggoiretrom14986	NA	NA	NA	NA	NA	NA	NA
hsa_retrop32043	ptriretrop35454	ggo_retrop04361	ppy_retrop17587	mmu_retrop33640	NA	NA	NA	NA	NA
hsa_retrop44028	ptr_retrop07048	ggo_retrop02905	ppy_retrop13852	mmu_retrop24771	NA	NA	NA	NA	NA
hsa_retrom41117	ptr_retrom06993	ggo_retrom02937	ppy_retrom12897	mmu_retrom22850	NA	NA	NA	NA	NA
hsairetrop14014	ptriretrop11651	ggo_retrop00799	ppyiretrop13704	NA	NA	NA	NA	NA	NA
hsa_retrom41882	ptr_retrom07117	ggo_retrom03032	ppy_retrom13132	mmu_retrom23371	NA	NA	NA	NA	NA
hsa_retrop24170	ptr_retrop11371	ggo_retrop01615	ppy_retrom10798	mmu_retrop22050	NA	NA	NA	NA	NA
hsa_retrop10391	NA	ggoiretrop15915	ppyiretrop25813	mmuiretrop18717	NA	NA	NA	NA	NA
hsa_retrop32758	ptr_retrom08843	ggo_retrom01161	NA	mmu_retrop30935	NA	NA	NA	NA	NA
hsa_retrom41886	ptriretrom25932	ggoiretrom22630	ppyiretrom28518	NA	NA	NA	NA	NA	NA
hsa_retrom25293	ptriretrom42176	ggo_retrom01851	NA	mmu_retrom10462	NA	NA	NA	NA	NA
hsa_retrop29620	ptr_retrop10087	ggo_retrop04067	ppy_retrom16442	NA	NA	NA	NA	NA	NA
hsa_retrom40443	ptr_retrom06517	ggo_retrom01690	ppy_retrom11519	mmu_retrop12947	NA	NA	NA	NA	NA
hsairetrop11252	ptriretrop15713	ggo_retrop01244	ppyiretrop17912	NA	NA	NA	NA	NA	NA
hsa_retrop14546	ptr_retrop02966	ggoiretrop04186	ppy_retrop06555	mmuiretrop07975	NA	NA	NA	NA	NA
hsa_retrom34753	ptr_retrom08451	ggo_retrom03816	ppy_retrom15136	mmu_retrom26107	NA	NA	NA	NA	NA
hsa_retrop11064	ptr_retrop04050	ggoiretrop08941	NA	NA	NA	NA	NA	NA	NA
hsa_retrop14545	ptr_retrop02965	NA	ppyiretrop11536	mmu_retrop08533	NA	NA	NA	NA	NA
hsa_retrom41408	ptr_retrom07036	ggo_retrom02972	ppy_retrom12994	mmu_retrom23091	NA	NA	NA	NA	NA
hsa_retrom14179	ptriretrom10988	ggo_retrom00755	NA	mmu_retrom26961	NA	NA	NA	NA	NA
hsa_retrop39846	ptr_retrop06561	ggo_retrop02449	ppy_retrop12908	mmu_retrop22628	NA	NA	NA	NA	NA
hsa_retrop32601	ptr_retrom08890	ggo_retrom01196	ppy_retrop16559	NA	NA	NA	NA	NA	NA
hsa_retrom38082	ptriretrom24134	ggo_retrom02607	ppy_retrom12459	NA	NA	NA	NA	NA	NA
hsa_retrop43983	ptriretrop25996	ggoiretrop21643	ppy_retrop13837	mmu_retrop24730	NA	NA	NA	NA	NA
hsa_retrop43981	ptriretrop25985	ggo_retrop02893	ppy_retrop13834	NA	NA	NA	NA	NA	NA
hsa_retrop42293	ptr_retrop06278	ggo_retrop01591	ppy_retrop11961	mmu_retrom10807	NA	NA	NA	NA	NA
hsa_retrom38240	ptr_retrom06821	ggo_retrom02661	ppyiretrom26748	mmu_retrom21300	NA	NA	NA	NA	NA
hsa_retrop36657	ptr_retrop08445	ggo_retrop03785	ppy_retrop16152	mmu_retrop27076	NA	NA	NA	NA	NA
hsa_retrom30981	ptr_retrop08809	ggo_retrop01128	ppy_retrom15513	NA	NA	NA	NA	NA	NA
hsa_retrom34970	ptr_retrom08504	ggo_retrom03844	ppy_retrom15213	mmu_retrop27988	NA	NA	NA	NA	NA
hsa_retrop15174	ptriretrop10436	ggo_retrop00626	NA	NA	NA	NA	NA	NA	NA
hsa_retrop37706	ptriretrop26833	ggoiretrop23829	ppy_retrom13807	mmu_retrom35296	NA	NA	NA	NA	NA
hsairetrop08640	ptriretrop19842	ggoiretrop15315	ppyiretrop24815	mmuiretrop19442	NA	NA	NA	NA	NA
hsa_retrom24810	ptr_retrom11024	ggo_retrom01781	ppy_retrom10836	NA	NA	NA	NA	NA	NA
hsa_retrop09348	ptr_retrop05461	ggoiretrop15790	NA	NA	NA	NA	NA	NA	NA
hsa_retrom38986	NA	ggo_retrom01555	ppy_retrop11485	mmu_retrop13684	NA	NA	NA	NA	NA
hsa_retrom25163	ptriretrom41954	ggo_retrom01827	ppy_retrom10954	mmu_retrom10240	NA	NA	NA	NA	NA
hsa_retrom35938	ptriretrom27274	ggoiretrom24180	ppy_retrop14327	mmu_retrop36543	NA	NA	NA	NA	NA
hsa_retrop01642	ptriretrop39568	ggoiretrop35165	ppy_retrom18232	mmu_retrop38741	NA	NA	NA	NA	NA
hsa_retrom40040	ptr_retrom06413	ggoiretrom12620	NA	NA	NA	NA	NA	NA	NA
hsa_retrop33163	ptr_retrop08843	ggo_retrop03467	ppy_retrop16758	NA	NA	NA	NA	NA	NA
hsa_retrop39939	ptriretrop24032	ggo_retrop02466	ppy_retrop12949	NA	NA	NA	NA	NA	NA
hsa_retrop43520	ptriretrop25516	ggo_retrop02829	ppy_retrop13690	NA	NA	NA	NA	NA	NA
hsa_retrom41065	ptr_retrom06979	ggoiretrom22032	ppy_retrom12883	mmu_retrom22793	NA	NA	NA	NA	NA
hsa_retrom09722	ptr_retrom06052	ggo_retrom02063	ppy_retrom12145	mmu_retrom16796	NA	NA	NA	NA	NA
hsa_retrom10549	ptr_retrom04453	ggo_retrom01329	ppy_retrom09095	mmu_retrom08251	NA	NA	NA	NA	NA
hsa_retrop43672	ptr_retrop06937	ggoiretrop22208	ppyiretrop29136	NA	NA	NA	NA	NA	NA
hsa_retrom40913	ptr_retrom06947	ggo_retrom02915	ppy_retrom12826	NA	NA	NA	NA	NA	NA
hsa_retrom34220	ptriretrom29507	ggo_retrom03727	ppy_retrom14947	NA	NA	NA	NA	NA	NA
hsairetrom16988	ptriretrop07780	ggoiretrom03666	ppyiretrop12404	NA	NA	NA	NA	NA	NA
hsairetrop41126	ptr_retrop07113	ggoiretrop23216	ppy_retrop13949	mmu_retrop25054	NA	NA	NA	NA	NA
hsa_retrom35337	ptr_retrom08594	ggo_retrom03901	ppy_retrom15372	mmu_retrop27525	NA	NA	NA	NA	NA
hsa_retrom34228	ptriretrom29526	ggo_retrom03729	NA	NA	NA	NA	NA	NA	NA
hsa_retrom14391	ptriretrom11298	ggoiretrom05353	NA	NA	NA	NA	NA	NA	NA
hsa_retrop38636	ptr_retrop07427	ggoiretrop23751	ppy_retrop14544	mmu_retrop37096	NA	NA	NA	NA	NA
hsa_retrom15428	ptr_retrom03255	ggoiretrom04287	ppy_retrom06778	mmuiretrom07086	NA	NA	NA	NA	NA
hsa_retrop09172	ptr_retrop05201	ggo_retrop02360	NA	mmu_retrop16327	NA	NA	NA	NA	NA
hsa_retrom28857	ptriretrom36736	ggo_retrom04108	ppy_retrom17100	mmu_retrop35390	NA	NA	NA	NA	NA
hsa_retrom35801	ptr_retrom07403	ggo_retrom03176	ppy_retrop14356	NA	NA	NA	NA	NA	NA
hsa_retrop37817	ptriretrop27075	ggo_retrop03039	ppy_retrom13712	NA	NA	NA	NA	NA	NA
hsa_retrop43295	ptr_retrop06864	ggoiretrop23081	ppy_retrop13622	mmu_retrop24076	NA	NA	NA	NA	NA
hsa_retrom34533	ptriretrom30014	ggo_retrom03778	ppy_retrom15071	mmu_retrom25920	NA	NA	NA	NA	NA
hsa_retrom04942	ptr_retrom05620	ggo_retrom02851	NA	mmu_retrom15382	NA	NA	NA	NA	NA
hsa_retrop06798	ptr_retrop04586	ggo_retrop02119	ppyiretrom18400	mmu_retrom13148	NA	NA	NA	NA	NA
hsa_retrom31106	ptr_retrop08800	NA	ppy_retrom15569	mmu_retrom30203	NA	NA	NA	NA	NA
hsa_retrom04943	ptr_retrom05622	ggoiretrom21175	ppy_retrom10631	mmu_retrom15390	NA	NA	NA	NA	NA
hsa_retrom25551	NA	ggo_retrom01885	ppyiretrom22572	mmu_retrom10644	NA	NA	NA	NA	NA
hsa_retrop06793	ptr_retrop04584	ggo_retrop02116	ppy_retrom09448	mmu_retrom13164	NA	NA	NA	NA	NA
hsa_retrop15958	ptr_retrom03080	ggo_retrop01058	ppy_retrop06125	mmu_retrop07251	NA	NA	NA	NA	NA
hsa_retrop28304	ptr_retrop09893	ggo_retrop03952	ppy_retrom16916	mmu_retrom33755	NA	NA	NA	NA	NA
hsa_retrom38279	ptr_retrom06825	ggo_retrom02668	ppy_retrom12504	mmu_retrom21323	mus_retrom97984	NA	NA	NA	NA
hsa_retrop31148	ptriretrop34293	ggoiretrop33517	NA	mmuiretrop31926	NA	NA	NA	NA	NA
hsa_retrop01768	ptr_retrop10512	ggo_retrop04567	ppy_retrom18165	mmu_retrop38880	NA	NA	NA	NA	NA
hsa_retrom04237	ptr_retrom05508	ggo_retrom02758	ppy_retrom10415	mmu_retrom14767	NA	NA	NA	NA	NA
hsa_retrop31141	ptr_retrop09575	ggo_retrop04203	NA	NA	NA	NA	NA	NA	NA
hsa_retrom04232	ptr_retrom05507	ggoiretrom20860	NA	NA	NA	NA	NA	NA	NA
hsa_retrop36838	ptr_retrop08509	ggo_retrop03813	ppy_retrop16201	mmu_retrop27316	NA	NA	NA	NA	NA
hsa_retrom41591	NA	ggo_retrom02990	ppy_retrom13033	mmu_retrom23170	NA	NA	NA	NA	NA
hsa_retrop25927	ptriretrop04301	ggoiretrop00179	ppy_retrop03133	mmu_retrom34556	NA	NA	NA	NA	NA
hsa_retrom06806	ptr_retrom01130	ggo_retrom02259	NA	mmu_retrop14519	NA	NA	NA	NA	NA
hsa_retrom29311	ptr_retrom09880	ggo_retrom04177	ppyiretrom38890	NA	NA	NA	NA	NA	NA
hsa_retrop17286	NA	ggo_retrop00548	ppy_retrop07061	mmuiretrop05690	NA	NA	NA	NA	NA
hsa_retrom38060	ptriretrom24120	ggoiretrom19950	ppy_retrom12456	NA	NA	NA	NA	NA	NA
hsa_retrom16528	ptriretrom09304	ggoiretrop28134	ppyiretrop10803	mmu_retrom06394	NA	NA	NA	NA	NA
hsa_retrom00737	ptr_retrom09996	NA	ppy_retrop19288	mmu_retrom36386	NA	NA	NA	NA	NA
hsa_retrom11301	ptr_retrom03726	ggo_retrom00934	ppyiretrom14336	NA	NA	NA	NA	NA	NA
hsa_retrop04071	ptriretrop41652	ggo_retrop04806	NA	NA	NA	NA	NA	NA	NA
hsa_retrom16489	ptr_retrop02712	ggo_retrop03353	ppy_retrom01943	NA	NA	NA	NA	NA	NA
hsa_retrop43189	NA	ggo_retrop02787	ppy_retrop13587	NA	mus_retrop100895	NA	NA	NA	NA
hsa_retrom31613	ptr_retrop08704	ggo_retrom03526	NA	NA	NA	NA	NA	NA	NA
hsa_retrom15334	ptr_retrop03053	ggo_retrom00637	NA	NA	NA	NA	NA	NA	NA
hsa_retrom15337	ptr_retrop03051	ggo_retrom00638	NA	NA	NA	NA	NA	NA	NA
hsa_retrom11594	ptr_retrom03801	ggo_retrom00989	ppy_retrom07823	NA	NA	NA	NA	NA	NA
hsa_retrom11436	ptr_retrom03762	ggoiretrom07000	ppy_retrom07740	NA	NA	NA	NA	NA	NA
hsa_retrop13729	ptr_retrop03235	ggo_retrop00759	ppy_retrop07232	mmu_retrop28417	NA	NA	NA	NA	NA
hsa_retrop29924	ptr_retrop10145	ggo_retrop04104	ppy_retrop18094	mmu_retrom34256	NA	NA	NA	NA	NA
hsairetrop09140	ptriretrom20800	ggo_retrop01861	ppy_retrop12266	NA	NA	NA	NA	NA	NA
hsa_retrom32163	NA	ggoiretrom26427	ppy_retrom15900	mmuiretrom28828	NA	NA	NA	NA	NA
hsa_retrom00957	ptr_retrom10070	ggo_retrom04520	ppy_retrop19182	mmu_retrom36635	NA	NA	NA	NA	NA
hsa_retrop13720	ptr_retrop03230	ggo_retrop00755	ppy_retrop07227	mmu_retrop28382	NA	NA	NA	NA	NA
hsa_retrop13726	ptr_retrop03233	ggo_retrop00757	ppy_retrop07231	mmu_retrop28415	NA	NA	NA	NA	NA
hsa_retrom00951	ptr_retrom10068	ggoiretrom34727	NA	NA	NA	NA	NA	NA	NA
hsa_retrom35060	ptr_retrom08530	ggo_retrom03860	ppy_retrom15281	NA	NA	NA	NA	NA	NA
hsa_retrop33147	ptr_retrop08839	ggoiretrop26200	ppy_retrop16755	mmu_retrop31368	NA	NA	NA	NA	NA
hsa_retrop25699	ptr_retrop02074	ggo_retrop00460	NA	NA	NA	NA	NA	NA	NA
hsa_retrop25696	ptriretrop05911	ggoiretrop02897	ppy_retrop05215	NA	NA	NA	NA	NA	NA
hsa_retrop00223	NA	ggo_retrop04437	ppy_retrom18637	mmu_retrop37910	NA	NA	NA	NA	NA
hsa_retrop25692	ptr_retrop02072	ggo_retrop00458	ppy_retrom05164	NA	NA	NA	NA	NA	NA
hsa_retrom22596	ptr_retrom04184	ggo_retrom01453	ppy_retrop08903	mmu_retrom17863	NA	NA	NA	NA	NA
hsairetrop15954	ptriretrom09033	ggoiretrom27377	ppyiretrop10566	mmuiretrop07301	musiretrom14733	rnoiretrom12969	mdo_retrop05408	NA	NA
hsa_retrop10707	ptriretrop21143	ggo_retrop01980	ppy_retrop12595	NA	NA	NA	NA	NA	NA
hsa_retrop37713	ptr_retrop07229	ggo_retrop03013	ppy_retrom13801	mmuiretrom34283	NA	NA	NA	NA	NA
hsa_retrom03606	ptr_retrom10739	ggo_retrom04818	NA	NA	NA	NA	NA	NA	NA
hsa_retrom34821	ptr_retrom08460	ggoiretrom29736	ppy_retrom15153	NA	NA	NA	NA	NA	NA
hsa_retrom03604	ptr_retrom10737	ggo_retrom04815	NA	NA	NA	NA	NA	NA	NA
hsa_retrom16230	ptr_retrop02787	ggo_retrom03481	ppyiretrom10381	NA	NA	NA	NA	NA	NA
hsa_retrom11548	ptriretrom12995	ggoiretrom06779	NA	NA	NA	NA	NA	NA	NA
hsa_retrop15903	ptriretrop08417	ggoiretrop07881	ppyiretrop10307	mmuiretrop06082	NA	NA	NA	NA	NA
hsa_retrom00887	ptr_retrom10037	ggo_retrom04504	ppy_retrop19228	mmu_retrom36496	NA	NA	NA	NA	NA
hsa_retrop31560	ptriretrom33732	ggoiretrop34056	ppy_retrop17428	mmu_retrom31735	NA	NA	NA	NA	NA
hsa_retrom11235	ptriretrom12424	ggo_retrom00922	ppy_retrom07619	mmu_retrom28576	mus_retrom50460	rno_retrom03633	NA	NA	NA
hsa_retrom29739	ptr_retrop09655	ggo_retrom04235	ppy_retrop17364	mmuiretrop32189	NA	NA	NA	NA	NA
hsa_retrop09421	ptr_retrop05470	ggo_retrop01794	ppy_retrop12085	NA	NA	NA	NA	NA	NA
hsairetrom30555	ptriretrom29203	ggo_retrom03687	ppyiretrom31424	mmuiretrom23008	NA	NA	NA	NA	NA
hsa_retrop16395	ptr_retrom02979	ggoiretrom27342	NA	mmu_retrop08032	NA	NA	NA	NA	NA
hsa_retrom27115	ptr_retrom01988	ggoiretrom00519	ppy_retrom02836	mmu_retrom09555	NA	NA	NA	NA	NA
hsa_retrop29328	ptriretrop36966	ggoiretrop32995	ppy_retrom16525	mmuiretrop32967	NA	NA	NA	NA	NA
hsa_retrom27584	ptr_retrom09482	ggo_retrom03980	ppy_retrop17990	mmu_retrop34862	NA	NA	NA	NA	NA
hsa_retrop34951	ptr_retrop07684	ggoiretrop29366	ppy_retrop15227	mmu_retrop25618	NA	NA	NA	NA	NA
hsa_retrop16390	ptr_retrom02982	ggo_retrom03461	ppy_retrom06429	mmu_retrop08028	NA	NA	NA	NA	NA
hsa_retrop25100	ptr_retrop11572	ggoiretrop13414	NA	NA	NA	NA	NA	NA	NA
hsa_retrom07391	ptr_retrom01591	ggo_retrom02307	NA	NA	NA	NA	NA	NA	NA
hsa_retrom10964	ptr_retrom03660	ggoiretrom06204	ppyiretrom13944	mmu_retrom28349	NA	NA	NA	NA	NA
hsa_retrop13389	ptr_retrop03157	ggo_retrop00694	ppy_retrop07091	mmu_retrop28095	mus_retrom91243	NA	NA	NA	NA
hsa_retrom34746	ptr_retrom08449	ggo_retrom03815	ppy_retrom15134	mmu_retrom26083	NA	NA	NA	NA	NA
hsa_retrop13435	NA	ggo_retrop00702	ppy_retrop07099	mmu_retrop28122	NA	NA	NA	NA	NA
hsairetrop28650	ptr_retrop09757	ggoiretrop34676	NA	NA	NA	NA	NA	NA	NA
hsa_retrom38132	ptr_retrom06797	ggo_retrom02614	ppy_retrom12471	mmu_retrom21236	NA	NA	NA	NA	NA
hsa_retrop37076	ptr_retrop08580	ggo_retrop03851	ppy_retrop16319	mmu_retrom26608	NA	NA	NA	NA	NA
hsa_retrom38470	NA	ggo_retrom02695	ppyiretrom27095	mmu_retrom21478	NA	NA	NA	NA	NA
hsa_retrom35663	ptr_retrom07369	ggo_retrom03156	ppy_retrop14447	mmu_retrop36739	NA	NA	NA	NA	NA
hsa_retrom36823	ptr_retrom07663	NA	ppy_retrom13986	mmu_retrom35782	NA	NA	NA	NA	NA
hsa_retrom06107	ptr_retrom04897	ggo_retrom02202	ppyiretrop18937	NA	NA	NA	NA	NA	NA
hsa_retrop34666	ptriretrop33965	ggoiretrop26798	ppy_retrop17190	NA	NA	NA	NA	NA	NA
hsa_retrom27592	ptriretrom35524	ggoiretrom30626	ppyiretrop39457	mmuiretrop33178	NA	NA	NA	NA	NA
hsa_retrom27593	ptr_retrom09486	ggo_retrom03985	NA	mmu_retrop34849	NA	NA	NA	NA	NA
hsa_retrop05479	ptr_retrop05326	ggo_retrop02625	ppy_retrom10496	mmu_retrom14980	NA	NA	NA	NA	NA
hsa_retrop10631	ptr_retrop05705	ggo_retrop01966	NA	mmuiretrop19886	NA	NA	NA	NA	NA
hsa_retrom03990	ptr_retrom05422	ggoiretrom20698	ppyiretrom20129	mmu_retrom14399	NA	NA	NA	NA	NA
hsa_retrop43516	ptr_retrop06907	ggo_retrop02828	ppy_retrop13686	NA	NA	NA	NA	NA	NA
hsa_retrop10634	ptriretrop21017	ggoiretrop14660	ppyiretrop26125	mmuiretrop18803	NA	NA	NA	NA	NA
hsa_retrop12527	ptriretrop12713	ggo_retrop00910	ppy_retrop07798	mmuiretrop25941	NA	NA	NA	NA	NA
hsa_retrop25212	NA	ggo_retrop00386	ppy_retrom05032	mmu_retrop10182	NA	NA	NA	NA	NA
hsa_retrom30085	ptriretrom34346	ggoiretrom32773	ppyiretrom35944	mmu_retrom32161	NA	NA	NA	NA	NA
hsa_retrop12529	ptr_retrop03640	ggo_retrop00912	ppy_retrop07800	NA	NA	NA	NA	NA	NA
hsa_retrop30386	ptriretrop38189	ggoiretrop32884	ppyiretrop40360	NA	NA	NA	NA	NA	NA
hsa_retrop11724	ptr_retrop04197	ggoiretrop08931	ppy_retrop09364	NA	NA	NA	NA	NA	NA
hsa_retrom19204	ptr_retrom02552	ggo_retrom00277	ppy_retrom04004	NA	NA	NA	NA	NA	NA
hsairetrom03152	ptriretrom40589	ggoiretrom36069	ppyiretrop40874	NA	NA	NA	NA	NA	NA
hsa_retrom38980	ptr_retrom06106	ggoiretrom11722	ppyiretrop23513	NA	NA	NA	NA	NA	NA
hsa_retrom26220	ptriretrom06001	ggo_retrom00450	ppy_retrom05171	mmu_retrop09883	NA	NA	NA	NA	NA
hsa_retrop36254	ptr_retrop08362	ggo_retrop03723	ppy_retrop15976	NA	NA	NA	NA	NA	NA
hsa_retrom28665	ptr_retrom09686	ggoiretrom30193	NA	mmu_retrop18595	NA	NA	NA	NA	NA
hsa_retrop12704	ptr_retrop03685	ggoiretrop06379	ppy_retrop07873	mmu_retrop29854	NA	NA	NA	NA	NA
hsa_retrop32942	ptriretrom31813	ggo_retrom01133	ppyiretrop35440	mmu_retrop31040	NA	NA	NA	NA	NA
hsa_retrom17123	ptr_retrom02806	ggoiretrom03568	NA	NA	NA	NA	NA	NA	NA
hsa_retrom42571	ptriretrom26473	ggo_retrom03102	ppy_retrom13381	NA	NA	NA	NA	NA	NA
hsa_retrom09481	NA	ggo_retrom02018	ppy_retrom12075	mmu_retrom16392	NA	NA	NA	NA	NA
hsa_retrom41050	ptr_retrom06977	ggo_retrom02931	ppy_retrom12875	NA	NA	NA	NA	NA	NA
hsa_retrop03855	ptriretrop41383	ggo_retrop04767	ppy_retrom17700	NA	NA	NA	NA	NA	NA
hsa_retrop32949	ptriretrom31796	ggo_retrom01130	ppy_retrop16688	mmu_retrop31079	NA	NA	NA	NA	NA
hsa_retrop03851	ptr_retrop10859	ggo_retrop04766	ppyiretrom39657	mmu_retrom38039	NA	NA	NA	NA	NA
hsa_retrop03852	ptr_retrop10860	NA	ppy_retrom17703	mmu_retrom38038	NA	NA	NA	NA	NA
hsa_retrop29219	ptr_retrop09977	ggo_retrop04015	NA	mmu_retrom32930	NA	NA	NA	NA	NA
hsa_retrop40172	ptriretrop24348	ggo_retrop02502	ppy_retrop13075	mmu_retrop22879	NA	NA	NA	NA	NA
hsa_retrop17092	ptr_retrop02557	ggoiretrop03845	ppy_retrop06953	mmu_retrop06784	NA	NA	NA	NA	NA
hsa_retrop17096	ptriretrop07943	ggoiretrop04007	ppy_retrop06967	NA	NA	NA	NA	NA	NA
hsairetrop10852	ptr_retrom01655	ggoiretrop09464	ppy_retrop09243	NA	NA	NA	NA	NA	NA
hsa_retrop40178	ptr_retrop06646	NA	ppy_retrop13078	mmu_retrop22892	NA	NA	NA	NA	NA
hsa_retrop30167	ptr_retrop10191	ggo_retrop04140	ppy_retrop18165	mmu_retrom33934	NA	NA	NA	NA	NA
hsa_retrop29189	ptriretrop36773	ggo_retrop04011	ppyiretrom37314	mmuiretrom32381	NA	NA	NA	NA	NA
hsa_retrom09707	ptriretrom21470	ggoiretrom15549	ppy_retrom12133	mmu_retrom16753	NA	NA	NA	NA	NA
hsa_retrom09706	ptr_retrom06047	ggo_retrom02061	ppy_retrom12130	mmu_retrom16748	NA	NA	NA	NA	NA
hsa_retrop10524	ptr_retrop05674	ggo_retrop01942	ppy_retrop12515	NA	NA	NA	NA	NA	NA
hsa_retrom28598	ptr_retrom09672	ggoiretrom30791	ppy_retrop17701	mmu_retrom32832	NA	NA	NA	NA	NA
hsa_retrop10526	ptriretrop20828	ggo_retrop01943	NA	NA	NA	NA	NA	NA	NA
hsairetrom22347	ptriretrom42494	ggoiretrom14059	NA	mmuiretrom10936	NA	NA	NA	NA	NA
hsa_retrop10522	ptr_retrop05673	ggoiretrop14624	ppyiretrop25939	mmuiretrop18747	NA	NA	NA	NA	NA
hsa_retrom09569	ptr_retrom06010	ggo_retrom02037	ppy_retrom12099	NA	NA	NA	NA	NA	NA
hsa_retrom29953	ptriretrom34180	ggo_retrom04286	ppy_retrom16178	NA	NA	NA	NA	NA	NA
hsa_retrop33127	ptr_retrop08836	ggo_retrop03460	ppy_retrop16751	NA	NA	NA	NA	NA	NA
hsa_retrom02958	ptr_retrom10543	ggo_retrom04710	ppy_retrop18653	mmu_retrom38456	NA	NA	NA	NA	NA
hsa_retrop31633	ptr_retrop09677	ggo_retrop04298	ppy_retrop17454	NA	NA	NA	NA	NA	NA
hsa_retrom07706	ptriretrom17392	NA	ppy_retrom09838	mmu_retrom13798	NA	NA	NA	NA	NA
hsa_retrom04505	ptr_retrom00929	ggo_retrom02771	ppy_retrom10459	mmu_retrop16704	NA	NA	NA	NA	NA
hsa_retrom02953	ptriretrom39947	ggo_retrom04709	ppyiretrop41475	mmu_retrom38455	NA	NA	NA	NA	NA
hsa_retrom09099	ptr_retrop05604	ggo_retrom01970	ppy_retrom11955	mmu_retrom16062	NA	NA	NA	NA	NA
hsairetrop07585	ptriretrop17423	ggoiretrop17755	NA	mmu_retrop15804	NA	NA	NA	NA	NA
hsa_retrop43765	NA	ggo_retrop02867	ppy_retrop13771	mmu_retrop24556	NA	NA	NA	NA	NA
hsa_retrop16578	ptr_retrop02861	ggoiretrom26145	NA	mmu_retrop07921	NA	NA	NA	NA	NA
hsa_retrop12670	ptr_retrop03675	ggo_retrop00921	ppy_retrop07862	mmu_retrop29832	NA	NA	NA	NA	NA
hsa_retrop03536	ptr_retrop10786	ggoiretrop37528	ppy_retrom17846	mmu_retrop40036	NA	NA	NA	NA	NA
hsairetrom29468	ptriretrom32595	ggo_retrom03555	ppyiretrom34267	NA	NA	NA	NA	NA	NA
hsa_retrop29530	ptr_retrop10072	ggoiretrop31546	ppy_retrom16459	mmu_retrop33982	NA	NA	NA	NA	NA
hsa_retrom17010	ptr_retrom02787	ggoiretrom03365	ppy_retrom07004	mmu_retrom05609	NA	NA	NA	NA	NA
hsa_retrop08977	ptr_retrop05089	ggoiretrop17832	ppy_retrop10297	mmu_retrop16145	NA	NA	NA	NA	NA
hsa_retrom37220	ptriretrom28664	ggoiretrom25083	ppy_retrom14056	mmu_retrom35937	NA	NA	NA	NA	NA
hsa_retrop08973	ptr_retrop05088	ggo_retrop02336	ppy_retrop10296	mmu_retrop16144	NA	NA	NA	NA	NA
hsa_retrom37225	ptriretrom28671	ggoiretrom24675	ppy_retrom14072	mmu_retrom35941	NA	NA	NA	NA	NA
hsa_retrop21684	ptr_retrop03873	ggoiretrop10018	ppy_retrom08732	mmu_retrop19286	NA	NA	NA	NA	NA
hsa_retrom06256	ptriretrom16798	ggoiretrom16682	ppy_retrop09655	mmu_retrop14809	NA	NA	NA	NA	NA
hsairetrom25740	ptr_retrom09676	ggoiretrom31131	NA	NA	NA	NA	NA	NA	NA
hsa_retrop21682	ptr_retrop03872	ggo_retrop01286	NA	mmu_retrop19284	NA	NA	NA	NA	NA
hsa_retrop44077	ptriretrop26165	NA	ppy_retrop13890	mmu_retrop24878	NA	NA	NA	NA	NA
hsairetrom09489	ptriretrom21291	ggoiretrom15294	ppyiretrom25243	mmu_retrom16580	NA	NA	NA	NA	NA
hsa_retrom38009	ptriretrom24066	ggo_retrom02598	ppyiretrom26537	NA	NA	NA	NA	NA	NA
hsa_retrom40112	ptr_retrom06424	ggoiretrom11843	ppy_retrom11405	mmu_retrom11905	NA	NA	NA	NA	NA
hsa_retrom28460	ptriretrom36229	ggo_retrom04047	ppy_retrop17769	mmu_retrom32735	NA	NA	NA	NA	NA
hsa_retrom25197	ptr_retrom11132	ggo_retrom01833	ppy_retrom10966	mmu_retrom10295	NA	NA	NA	NA	NA
hsa_retrom25195	ptriretrom42028	ggoiretrom13663	ppy_retrom10964	mmu_retrom10293	NA	NA	NA	NA	NA
hsa_retrom08545	ptr_retrom05666	ggo_retrom01900	ppy_retrom11651	mmu_retrom15651	NA	NA	NA	NA	NA
hsa_retrop31700	ptr_retrop09692	ggo_retrop04309	ppy_retrop17488	mmu_retrop33271	NA	NA	NA	NA	NA
hsa_retrom25750	ptr_retrom02070	ggoiretrom02668	ppy_retrom04968	NA	NA	NA	NA	NA	NA
hsa_retrop43881	ptr_retrop06981	ggo_retrop02883	ppy_retrop13812	mmu_retrop24639	NA	NA	NA	NA	NA
hsa_retrop14621	ptr_retrop02975	ggo_retrop00583	ppyiretrop11589	mmu_retrop08577	NA	NA	NA	NA	NA
hsa_retrom02822	ptr_retrom10507	ggo_retrom04691	ppy_retrop18709	NA	NA	NA	NA	NA	NA
hsa_retrom29882	ptriretrop34580	ggoiretrom33363	ppyiretrom35674	NA	NA	NA	NA	NA	NA
hsa_retrom14478	ptriretrom11442	ggo_retrom00811	ppy_retrom07300	mmu_retrom27318	NA	NA	NA	NA	NA
hsa_retrom01636	ptr_retrop10574	ggo_retrom04616	ppy_retrop18934	NA	NA	NA	NA	NA	NA
hsa_retrom01630	ptr_retrop10575	ggo_retrom04615	ppy_retrop18936	NA	NA	NA	NA	NA	NA
hsa_retrop44213	ptriretrop26368	ggoiretrop23221	ppy_retrop13961	mmu_retrop25111	NA	NA	NA	NA	NA
hsa_retrom32761	ptriretrom29071	ggo_retrom03673	NA	mmu_retrom24484	NA	NA	NA	NA	NA
hsa_retrom25924	ptr_retrom02125	ggoiretrom02712	ppy_retrom05072	NA	NA	NA	NA	NA	NA
hsa_retrom42391	ptr_retrom07231	ggo_retrom03087	NA	NA	NA	NA	NA	NA	NA
hsa_retrom24374	ptr_retrom04291	ggo_retrom01507	ppy_retrom08474	mmu_retrom20258	NA	NA	NA	NA	NA
hsa_retrom41875	ptr_retrom07115	ggo_retrom03028	NA	NA	NA	NA	NA	NA	NA
hsa_retrom24371	ptr_retrom04289	ggo_retrom01506	ppy_retrom08473	mmu_retrom20254	NA	NA	NA	NA	NA
hsa_retrop44521	ptr_retrop07166	ggo_retrop02970	NA	mmu_retrop25320	NA	NA	NA	NA	NA
hsa_retrom25287	ptr_retrom11152	ggo_retrom01850	ppy_retrom11002	mmu_retrom10452	NA	NA	NA	NA	NA
hsa_retrom25285	ptriretrom42146	ggo_retrom01849	ppy_retrom10999	mmu_retrom10436	NA	NA	NA	NA	NA
hsa_retrop10387	ptr_retrom05820	ggo_retrop01927	ppy_retrop12466	mmu_retrop18372	NA	NA	NA	NA	NA
hsa_retrom07856	ptr_retrom05161	ggoiretrom16944	ppy_retrom09913	mmu_retrom13897	NA	NA	NA	NA	NA
hsa_retrom25572	ptriretrom42492	NA	ppyiretrom22590	mmu_retrom10646	NA	NA	NA	NA	NA
hsa_retrop03681	ptr_retrop10821	ggo_retrop04726	ppy_retrom17779	mmu_retrom38259	NA	NA	NA	NA	NA
hsa_retrom35458	ptr_retrom08621	ggo_retrom03932	ppyiretrom33343	mmu_retrom26807	NA	NA	NA	NA	NA
hsa_retrom28621	NA	ggo_retrom04069	ppy_retrop17697	mmu_retrom32846	NA	NA	NA	NA	NA
hsa_retrop16704	ptr_retrop02893	ggo_retrom03401	ppy_retrop06392	mmu_retrop08279	NA	NA	NA	NA	NA
hsa_retrom09961	ptr_retrom04316	ggo_retrom01239	NA	NA	NA	NA	NA	NA	NA
hsa_retrom07858	ptr_retrom05162	ggoiretrom16095	ppy_retrom09914	mmu_retrom13898	NA	NA	NA	NA	NA
hsa_retrom10203	NA	ggo_retrom01276	ppyiretrom17034	mmu_retrom07780	NA	NA	NA	NA	NA
hsa_retrom01299	ptr_retrom10148	ggo_retrom04560	ppy_retrop19063	mmu_retrom36923	NA	NA	NA	NA	NA
hsa_retrom04728	ptr_retrom05561	ggoiretrom21122	ppyiretrop21001	mmuiretrop16962	NA	NA	NA	NA	NA
hsa_retrom14277	ptr_retrom03418	ggo_retrom00770	ppy_retrom07220	mmu_retrom27058	NA	NA	NA	NA	NA
hsa_retrop41543	ptr_retrop06034	ggoiretrop11515	ppy_retrop11632	mmuiretrop13001	NA	NA	NA	NA	NA
hsa_retrop32617	ptr_retrom08884	ggo_retrom01193	ppy_retrop16570	mmu_retrop30631	NA	NA	NA	NA	NA
hsa_retrop00221	ptriretrop38493	ggo_retrop04436	ppy_retrom18640	mmu_retrop37903	NA	NA	NA	NA	NA
hsa_retrop32611	ptr_retrom08885	ggo_retrom01194	NA	mmu_retrop30621	NA	NA	NA	NA	NA
hsa_retrom24972	ptriretrom41696	ggoiretrom13252	NA	NA	NA	NA	NA	NA	NA
hsa_retrop44325	NA	ggo_retrop02953	ppy_retrop14018	mmu_retrop25198	NA	NA	NA	NA	NA
hsairetrop27141	NA	ggo_retrom04181	ppy_retrom17293	NA	mus_retrop48819	rno_retrom00824	NA	NA	NA
hsa_retrop43467	ptr_retrom07073	ggoiretrom23468	NA	mmu_retrom23195	NA	NA	NA	NA	NA
hsa_retrop43466	ptr_retrop06893	NA	ppy_retrom13052	mmu_retrop24280	NA	NA	NA	NA	NA
hsa_retrop05070	ptr_retrop05264	ggo_retrop02579	ppy_retrop10539	mmu_retrop16668	NA	NA	NA	NA	NA
hsa_retrop05071	ptr_retrop05265	ggoiretrop20518	ppyiretrop20796	mmuiretrop16921	NA	NA	NA	NA	NA
hsa_retrop05074	ptriretrop18545	ggoiretrop20902	ppyiretrop20811	mmu_retrop16675	NA	NA	NA	NA	NA
[truncated: 1,902 more rows]

## Sheet: Retrocopy families (marsupials)
# Supplemental Table S6: marsupials orthologous retrocopy families
opossum	tasmanian_devil	wallaby
mdo_retrop30082	shairetrop08648	meuiretrom15022
mdo_retrop27561	shairetrop06721	meuiretrop16325
mdoiretrom28508	sha_retrom02922	meu_retrop01937
mdo_retrom29312	sha_retrom04698	meuiretrom14769
mdo_retrop12248	sha_retrop02406	meuiretrop13965
mdo_retrop06490	sha_retrop02875	meu_retrop03431
mdo_retrop00426	sha_retrop03211	meu_retrop02754
mdo_retrop11898	shairetrop01449	meuiretrop16213
mdo_retrom17847	sha_retrop03309	meuiretrop08877
mdoiretrop06249	sha_retrop02870	meuiretrop12539
mdo_retrop16465	shairetrop09252	meuiretrom04643
mdoiretrom15333	sha_retrom04311	meu_retrom02642
mdo_retrom09142	sha_retrop01391	meuiretrom08751
mdoiretrom13192	shairetrom02660	meuiretrop14462
mdo_retrom08074	shairetrop01606	meuiretrop16573
mdo_retrop06420	sha_retrom01341	meuiretrom12085
mdo_retrom12948	sha_retrom00981	meuiretrom15053
mdo_retrop08318	sha_retrop02538	meuiretrom14806
mdo_retrom13046	sha_retrom04623	meuiretrop12894
mdo_retrop24164	sha_retrop03381	meuiretrop15192
mdo_retrop00371	sha_retrop04065	meuiretrop14441
mdo_retrom09037	sha_retrop04103	meuiretrom13197
mdo_retrop12667	sha_retrom03412	meuiretrop15331
mdo_retrop17962	sha_retrom02801	meuiretrop11442
mdo_retrom29763	sha_retrom01391	meuiretrop15975
mdoiretrom16569	shairetrom01760	meuiretrom07775
mdo_retrop29865	sha_retrom03758	meuiretrom14670
mdo_retrom08947	sha_retrom02028	meu_retrom03490
mdo_retrop07395	sha_retrom01400	meu_retrom01743
mdoiretrop29815	sha_retrop04906	meu_retrom01113
mdo_retrom12143	sha_retrop04206	meuiretrop04876
mdoiretrop09139	shairetrop02912	meuiretrop05719
mdo_retrom25982	shairetrom08333	meuiretrop10072
mdo_retrop13595	sha_retrom02828	meuiretrop11213
mdoiretrom13616	sha_retrom04472	meuiretrom08871
mdo_retrom05444	sha_retrom04642	meuiretrop03602
mdo_retrop05741	sha_retrop03523	meu_retrop02298
mdo_retrom31227	sha_retrop04651	meu_retrom01054
mdo_retrop05796	sha_retrop03244	meu_retrop01081
mdo_retrom09013	sha_retrop03906	meu_retrop02463
mdo_retrom05402	sha_retrom01177	meu_retrom03146
mdo_retrom15432	sha_retrop01133	meu_retrom02116
mdo_retrop03183	shairetrop07990	meu_retrom03008
mdo_retrop25519	sha_retrop01404	meuiretrom11318
mdo_retrom08781	shairetrom06395	meuiretrop05071
mdo_retrop14478	sha_retrom01349	meuiretrom08980
mdo_retrop12835	sha_retrop04826	meuiretrop04145
mdo_retrom07982	sha_retrom02276	meu_retrom00727
mdo_retrop11440	sha_retrop02699	meuiretrom10326
mdo_retrom22352	sha_retrop01251	meu_retrop00292
mdo_retrom21451	sha_retrom01001	meu_retrom00399
mdo_retrop13918	shairetrom03684	meuiretrom00796
mdo_retrop22918	shairetrop04774	meuiretrom02257
mdo_retrop29877	sha_retrom03694	meu_retrom02151
mdo_retrop07839	shairetrop08240	meuiretrop10729
mdo_retrop16799	sha_retrop03078	meu_retrom02284
mdo_retrop00882	shairetrom01244	meuiretrop09980
mdoiretrom06829	sha_retrom03879	meu_retrom00457
mdo_retrop26985	sha_retrop04380	meuiretrop14115
mdo_retrop08285	sha_retrop02650	meuiretrom10322
mdo_retrom03223	shairetrop08113	meuiretrom14214
mdo_retrop23277	sha_retrop05160	meuiretrop10580
mdo_retrop00450	sha_retrop04769	meuiretrom10330
mdo_retrom00473	shairetrom05667	meu_retrom02430
mdo_retrop08836	sha_retrop04760	meu_retrom02140
mdo_retrom25495	sha_retrom03904	meu_retrom00585
mdo_retrop00546	shairetrop04459	meu_retrom03334
mdo_retrop03297	sha_retrom03989	meu_retrop00275
mdo_retrop21499	shairetrop09110	meuiretrop00947
mdo_retrom22944	sha_retrom02377	meuiretrop07897
mdo_retrop00572	sha_retrop02641	meu_retrop00883
mdo_retrom00399	sha_retrom04577	meuiretrom08797
mdo_retrom26963	sha_retrom02602	meu_retrom00375
mdo_retrop11752	sha_retrop01772	meu_retrop03038
mdo_retrom20393	sha_retrom04845	meu_retrom00520
mdo_retrom24995	sha_retrom04726	meu_retrop02453
mdoiretrop24073	sha_retrop03726	meuiretrop08527
mdo_retrop29131	sha_retrop03394	meu_retrom00498
mdo_retrop13862	shairetrop08238	meuiretrop03643
mdo_retrom05215	sha_retrom05030	meu_retrop00168
mdo_retrom16835	shairetrom03127	meuiretrop08822
mdoiretrop15857	sha_retrop04153	meuiretrom07824
mdo_retrom13484	sha_retrop02064	meuiretrop07869
mdo_retrom21173	sha_retrom01550	meu_retrop02975
mdo_retrom00391	sha_retrom04576	meuiretrom08343
mdo_retrom07695	sha_retrom03941	meuiretrom09338
mdoiretrop15978	sha_retrop05081	meuiretrom06455
mdo_retrop24834	sha_retrom02925	meuiretrom07800
mdo_retrop31059	sha_retrop04866	meu_retrom00404
mdo_retrop17921	shairetrom06503	meuiretrop02111
mdo_retrop29539	sha_retrop03699	meuiretrop08056
mdo_retrom08205	shairetrom04306	meuiretrop09407
mdo_retrop23915	sha_retrop04674	meu_retrom01731
mdoiretrom19476	sha_retrom01802	meuiretrom08224
mdo_retrop07557	sha_retrop04057	meuiretrop06920
mdoiretrom07680	sha_retrop03517	meu_retrom01560
mdo_retrop08713	shairetrop09920	meuiretrom12148
mdo_retrom13286	shairetrop02576	meuiretrop06393
mdo_retrom07486	sha_retrom04910	meu_retrop01218
mdo_retrom29059	sha_retrop02125	meuiretrom00440
mdoiretrom29350	sha_retrom04943	meu_retrop01966
mdo_retrop14536	sha_retrom03519	meu_retrop00056
mdo_retrom14171	sha_retrop01189	meuiretrom00278
mdo_retrom25843	sha_retrom00789	meu_retrom02793
mdo_retrop00347	shairetrop07107	meu_retrop01802
mdo_retrom10114	sha_retrop02859	meuiretrom08464
mdo_retrom23607	sha_retrom01192	meu_retrom00001
mdo_retrom00548	sha_retrom03947	meu_retrom02545
mdo_retrom00202	shairetrop01698	meu_retrop01698
mdo_retrop16555	sha_retrop04819	meu_retrop01934
mdo_retrop11845	sha_retrop05130	meu_retrop02561
mdo_retrop19725	sha_retrom04043	meu_retrop01565
mdoiretrom21259	sha_retrop01220	meu_retrop01083
mdo_retrop00883	sha_retrop02127	meu_retrom02913
mdo_retrop15690	sha_retrom01584	meuiretrop06645
mdo_retrom12675	sha_retrop04855	meu_retrom01606
mdo_retrop08700	sha_retrop02829	meu_retrop02767
mdo_retrop22288	sha_retrop03715	meu_retrop01122
mdo_retrop30312	sha_retrop02414	meu_retrom01410
mdo_retrom16601	sha_retrom02287	meu_retrom02729
mdoiretrop06131	shairetrom01696	meuiretrom04130
mdo_retrom00341	sha_retrom02902	meuiretrop05093
mdoiretrop26432	shairetrop10214	meuiretrop04772
mdo_retrop22347	shairetrop06606	meuiretrom04115
mdo_retrom11539	sha_retrom04041	meu_retrop00906
mdo_retrom14537	sha_retrop03093	meuiretrop12707

## Sheet: Intact families (10 species)
# Supplemental Table S6: intact orthologous retrocopy families shared by at least two species from the main dataset
human	chimpanzee	gorilla	orangutan	macaque	mouse	rat	opossum	platypus	chicken
hsa_retrom08497	ptr_retrom05397	ggoiretrom17077	ppy_retrom10262	mmuiretrom13524	NA	NA	NA	NA	NA
hsa_retrom04584	ptriretrom18906	ggoiretrom21079	ppy_retrop10678	mmu_retrop17063	NA	NA	NA	NA	NA
hsa_retrop33257	ptr_retrop08874	NA	ppyiretrop35795	NA	NA	NA	NA	NA	NA
hsa_retrom40747	NA	ggo_retrom02891	ppy_retrom12756	mmu_retrom22451	NA	NA	NA	NA	NA
hsa_retrop37776	ptriretrop26967	ggoiretrop23691	NA	NA	NA	NA	NA	NA	NA
hsa_retrop11144	ptr_retrop04066	ggo_retrop01171	ppy_retrop09164	mmu_retrop09242	NA	NA	NA	NA	NA
hsairetrom11641	ptr_retrom03743	NA	ppyiretrom14451	NA	mus_retrom50572	rno_retrom03657	mdo_retrom27996	NA	NA
hsa_retrom25747	ptr_retrom02067	ggo_retrop00403	ppy_retrom04966	NA	NA	NA	NA	NA	NA
hsa_retrom18808	NA	NA	ppy_retrom03831	mmu_retrom03564	NA	NA	NA	NA	NA
hsairetrom24670	ptriretrom35270	ggo_retrom03954	NA	NA	NA	NA	NA	NA	NA
hsa_retrom14708	ptr_retrom03545	ggo_retrom00862	NA	NA	NA	rno_retrom07089	NA	NA	NA
hsa_retrom29895	ptr_retrop09625	ggo_retrom04276	ppy_retrom16162	mmu_retrop32955	mus_retrom96889	rno_retrop02285	NA	NA	NA
hsa_retrop15879	ptr_retrop02685	ggo_retrop01033	NA	NA	NA	NA	NA	NA	NA
NA	ptriretrom35008	ggo_retrom04380	ppy_retrom16357	NA	NA	NA	NA	NA	NA
hsa_retrop43171	ptr_retrop06838	ggo_retrop02783	ppyiretrop28627	mmu_retrop23994	NA	NA	NA	NA	NA
hsa_retrom16935	ptr_retrom02764	NA	ppy_retrom06966	mmu_retrom05523	NA	NA	NA	NA	NA
hsa_retrop34579	ptriretrop33817	NA	ppy_retrop17153	NA	NA	NA	NA	NA	NA
hsa_retrom03452	ptr_retrom10685	ggo_retrom04805	NA	mmu_retrop39460	NA	NA	NA	NA	NA
NA	ptr_retrop05476	ggoiretrop15804	ppyiretrop24796	NA	NA	NA	NA	NA	NA
hsa_retrop09455	ptriretrop19829	ggo_retrop01800	ppy_retrop12095	NA	NA	NA	NA	NA	NA
hsa_retrom00324	ptr_retrom09943	ggo_retrom04459	NA	mmu_retrom36174	NA	NA	NA	NA	NA
hsa_retrom37988	ptr_retrom06744	ggo_retrom02587	ppy_retrom12408	mmu_retrom21159	NA	NA	NA	NA	NA
hsa_retrop19956	ptr_retrop02425	NA	ppyiretrop07724	NA	NA	NA	NA	NA	NA
hsa_retrop24009	ptriretrop14867	ggoiretrop10160	ppyiretrop15925	mmuiretrop20722	mus_retrop70539	rno_retrom00350	mdo_retrop03702	NA	gga_retrop30433
NA	NA	ggo_retrom03051	ppy_retrom13199	mmu_retrom23581	NA	NA	NA	NA	NA
hsa_retrop06729	ptr_retrop04568	NA	ppy_retrom09471	NA	NA	NA	NA	NA	NA
hsa_retrom35417	ptr_retrom08613	ggo_retrom03915	NA	NA	NA	NA	NA	NA	NA
hsa_retrom16629	ptriretrom09438	ggo_retrop03326	ppy_retrom06481	NA	NA	NA	NA	NA	NA
hsa_retrop40672	ptriretrop21747	ggo_retrop01440	ppyiretrom23014	mmu_retrom11625	musiretrop30459	NA	NA	NA	NA
hsa_retrom16710	ptriretrom09626	ggo_retrop03304	ppy_retrom06520	mmu_retrom06760	NA	NA	NA	NA	NA
hsa_retrom29102	ptriretrom37117	ggoiretrom31806	NA	NA	NA	NA	NA	NA	NA
hsa_retrom09793	ptriretrom21610	ggoiretrom14879	ppyiretrom25531	NA	NA	NA	NA	NA	NA
hsa_retrop21639	ptr_retrop03864	ggoiretrop09991	ppyiretrom16558	mmuiretrop20544	NA	NA	NA	NA	NA
NA	ptriretrop21644	ggoiretrop12044	ppyiretrom23104	NA	NA	NA	NA	NA	NA
hsa_retrom38040	ptr_retrom06772	ggo_retrom02599	ppy_retrom12447	NA	NA	NA	NA	NA	NA
hsa_retrom38978	ptr_retrom06105	ggo_retrom01554	ppy_retrop11490	mmu_retrop13686	mus_retrom40716	rno_retrom07517	NA	NA	NA
hsairetrom23232	ptriretrom05981	ggo_retrom00447	NA	NA	NA	NA	NA	NA	NA
hsa_retrop33087	ptr_retrop08831	ggoiretrop26974	ppy_retrop16740	NA	NA	NA	NA	NA	NA
hsairetrop23312	ptriretrop05953	ggo_retrop00464	ppyiretrop08929	NA	NA	NA	NA	NA	NA
hsa_retrop08870	ptr_retrop05057	ggo_retrop02312	ppy_retrop10253	mmu_retrop16057	musiretrom15167	rnoiretrom18953	NA	NA	NA
hsa_retrom31634	ptriretrop32079	NA	NA	mmuiretrom27611	NA	NA	NA	NA	NA
hsa_retrop13476	ptriretrop11004	ggoiretrop05158	NA	NA	NA	NA	NA	NA	NA
hsa_retrop44356	NA	NA	ppy_retrop14024	mmu_retrop25241	NA	NA	NA	NA	NA
hsa_retrop05828	ptr_retrop05407	ggoiretrop20665	NA	mmu_retrop17361	NA	NA	NA	NA	NA
hsa_retrom01027	ptr_retrom10090	ggo_retrom04528	NA	NA	NA	NA	NA	NA	NA
hsa_retrom24471	ptriretrom41121	ggo_retrom01743	ppy_retrop10844	mmu_retrom20589	mus_retrop114001	rno_retrop02069	NA	NA	NA
hsa_retrop12739	ptr_retrop03704	ggo_retrop00930	ppy_retrop07879	NA	NA	NA	NA	NA	NA
hsa_retrop16464	ptriretrom08541	ggoiretrom27069	ppyiretrop03274	NA	NA	NA	NA	NA	NA
hsa_retrop16468	ptriretrom08533	ggoiretrom26175	ppyiretrop03286	NA	NA	NA	NA	NA	NA
hsa_retrop42639	ptriretrop24817	ggoiretrop23012	ppy_retrop13322	NA	NA	NA	NA	NA	NA
hsa_retrop34844	NA	ggo_retrop03626	ppy_retrop15191	NA	mus_retrop51942	rno_retrom01172	NA	NA	NA
NA	ptr_retrop07092	ggo_retrop02920	ppyiretrop29698	NA	NA	NA	NA	NA	NA
hsa_retrom34424	ptr_retrom08366	ggo_retrom03757	NA	NA	NA	NA	NA	NA	NA
hsa_retrom10386	NA	NA	ppy_retrom09004	mmu_retrom08014	NA	NA	NA	NA	NA
hsa_retrop44133	ptr_retrop07093	ggo_retrop02921	ppy_retrop13921	NA	NA	NA	NA	NA	NA
hsa_retrop03311	ptriretrop40657	ggoiretrop34905	ppyiretrom40325	NA	NA	NA	NA	NA	NA
hsa_retrop36545	ptriretrop30544	NA	ppy_retrop16082	NA	NA	NA	NA	NA	NA
hsa_retrop37891	ptriretrop27172	ggo_retrop03050	ppyiretrom29874	NA	NA	NA	NA	NA	NA
hsa_retrop10844	ptr_retrop05753	ggo_retrop02001	ppy_retrop12634	NA	NA	NA	NA	NA	NA
hsa_retrom40355	ptr_retrom06464	NA	ppyiretrom23592	mmuiretrop12825	NA	NA	NA	NA	NA
hsa_retrop31246	ptr_retrop09600	ggo_retrop04219	ppy_retrop17317	NA	NA	NA	NA	NA	NA
hsa_retrom04154	ptr_retrom05483	ggo_retrom02746	NA	NA	NA	NA	NA	NA	NA
hsairetrom32244	ptriretrom30970	ggoiretrom27869	NA	NA	NA	NA	NA	NA	NA
hsa_retrom34552	ptr_retrom08406	ggo_retrom03784	ppy_retrom15081	NA	NA	NA	NA	NA	NA
hsa_retrop44036	ptr_retrop07050	NA	ppy_retrop13857	NA	NA	NA	NA	NA	NA
hsairetrop24499	ptriretrop04910	ggoiretrop01003	NA	mmuiretrop10780	mus_retrop70634	rnoiretrom01748	NA	NA	NA
hsa_retrop24721	ptriretrop42865	ggoiretrop12953	ppyiretrop22274	mmuiretrop11569	NA	NA	NA	NA	NA
hsa_retrom16945	ptriretrom07930	NA	ppyiretrom12290	mmuiretrom04906	NA	NA	NA	NA	NA
hsa_retrop34562	ptriretrop33779	ggoiretrop26762	ppy_retrop17147	NA	NA	NA	NA	NA	NA
hsa_retrop18121	ptriretrop06465	ggoiretrop01612	NA	NA	NA	NA	NA	NA	NA
hsa_retrom10659	ptr_retrom04488	ggo_retrom01344	NA	mmu_retrom08445	NA	NA	NA	NA	NA
hsa_retrop41389	ptr_retrop06006	ggo_retrop01529	ppy_retrop11587	NA	NA	NA	NA	NA	NA
hsa_retrom34951	ptr_retrom08499	NA	ppy_retrom15201	NA	NA	NA	NA	NA	NA
hsa_retrom29755	ptr_retrop09653	ggoiretrom33111	ppyiretrop37367	NA	NA	NA	NA	NA	NA
hsa_retrom29756	ptr_retrop09652	ggo_retrom04240	NA	NA	NA	NA	NA	NA	NA
hsa_retrom36800	NA	NA	ppy_retrom13978	mmu_retrom35744	NA	NA	NA	NA	NA
hsa_retrop13786	ptr_retrop03246	ggo_retrop00765	ppy_retrop07256	mmu_retrop28449	NA	NA	NA	NA	NA
hsa_retrom16095	ptr_retrop02828	ggo_retrom01117	NA	NA	NA	NA	NA	NA	NA
hsa_retrop08652	ptr_retrop05005	ggoiretrop17009	ppy_retrop10173	NA	NA	NA	NA	NA	NA
hsa_retrom31563	ptr_retrop08718	NA	ppy_retrom15664	mmu_retrom30567	NA	NA	NA	NA	NA
hsa_retrop15465	ptr_retrop03112	ggoiretrop04446	NA	NA	NA	NA	NA	NA	NA
hsa_retrop21604	ptr_retrop03855	ggo_retrop01273	ppy_retrom08789	mmu_retrop19119	mus_retrom49633	rno_retrom03541	NA	NA	gga_retrop28989
hsairetrop39918	NA	ggoiretrop22737	ppy_retrop13582	mmu_retrom22982	NA	NA	NA	NA	NA
hsa_retrom26243	ptriretrom06037	ggoiretrom02775	ppyiretrom08379	mmu_retrop09860	NA	NA	NA	NA	NA
hsa_retrom37791	ptriretrom23648	ggoiretrom19370	ppy_retrom12341	NA	NA	NA	NA	NA	NA
hsairetrop02602	ptriretrop40705	ggo_retrop04680	NA	NA	NA	NA	NA	NA	NA
hsa_retrom35644	ptr_retrom07363	NA	ppy_retrop14458	mmu_retrop36767	mus_retrop53855	rnoiretrop26298	NA	NA	NA
hsa_retrop40111	ptr_retrop06627	ggoiretrop19333	ppy_retrop13050	NA	NA	NA	NA	NA	NA
NA	ptr_retrop05889	ggo_retrop01456	ppy_retrom11175	NA	NA	NA	NA	NA	NA
hsa_retrop01821	ptr_retrop10521	ggo_retrop04571	ppy_retrom18155	NA	NA	NA	NA	NA	NA
hsa_retrop05838	ptr_retrop05411	ggo_retrop02690	ppy_retrop10789	NA	NA	NA	NA	NA	NA
hsa_retrom32131	NA	ggoiretrom26417	ppy_retrom15889	NA	NA	NA	NA	NA	NA
hsa_retrom08059	ptr_retrom05205	NA	ppy_retrom10006	NA	NA	NA	NA	NA	NA
hsa_retrop16472	ptriretrop09390	ggoiretrom26173	ppy_retrop01892	NA	NA	NA	NA	NA	NA
hsa_retrop09935	ptr_retrom05916	ggoiretrop14507	NA	NA	NA	NA	NA	NA	NA
hsa_retrom01308	ptriretrom38759	ggo_retrom04563	ppy_retrop19059	NA	NA	NA	NA	NA	NA
hsa_retrop42575	ptr_retrop06711	ggo_retrop02719	ppy_retrop13294	NA	NA	NA	NA	NA	NA
hsa_retrop24937	ptr_retrop11536	ggo_retrop01722	ppyiretrop22566	mmu_retrop12623	NA	NA	NA	NA	NA
hsa_retrop31310	NA	ggoiretrop33555	NA	mmu_retrop32928	NA	NA	NA	NA	NA
hsa_retrom28068	ptr_retrom09503	NA	ppy_retrop17958	NA	NA	NA	NA	NA	NA
hsa_retrop18209	ptriretrop06512	ggoiretrop01617	NA	NA	NA	NA	NA	NA	NA
hsa_retrop36932	ptr_retrop08542	ggo_retrop03828	NA	NA	NA	NA	NA	NA	NA
hsa_retrop24710	NA	ggo_retrop01681	ppy_retrop10988	NA	NA	NA	NA	NA	NA
hsa_retrop03571	ptr_retrop10796	ggoiretrop34927	NA	NA	NA	NA	NA	NA	NA
hsa_retrom34413	ptriretrom29786	NA	ppy_retrom15023	NA	NA	NA	NA	NA	NA
hsa_retrom16954	ptriretrom07941	NA	ppy_retrom06979	NA	NA	NA	NA	NA	NA
hsa_retrom31396	ptr_retrop08743	ggo_retrop01096	ppy_retrom15638	mmu_retrom30456	mus_retrop52885	rnoiretrop42635	NA	NA	NA
hsa_retrop28025	NA	ggo_retrop03930	ppy_retrom17009	mmuiretrop33361	NA	NA	NA	NA	NA
hsairetrop34050	ptriretrop26823	ggoiretrop24825	NA	NA	NA	NA	NA	NA	NA
hsa_retrop10688	ptr_retrop05720	ggoiretrop14679	ppyiretrop26220	NA	mus_retrop71221	rnoiretrom23055	NA	NA	NA
hsa_retrom03275	ptriretrom40494	ggo_retrom04767	ppy_retrop18518	mmu_retrop39563	NA	NA	NA	NA	NA
hsairetrom03253	NA	NA	ppyiretrop40787	mmuiretrop39741	musiretrop13650	rno_retrop01817	NA	NA	NA
hsa_retrop25644	NA	ggo_retrop00442	ppy_retrop05186	mmu_retrom08648	NA	NA	NA	NA	NA
hsairetrom11909	ptriretrom12929	ggoiretrom07882	ppyiretrom14752	NA	NA	NA	NA	NA	NA
hsa_retrop25085	ptr_retrop11569	ggo_retrop01744	ppy_retrop11130	mmu_retrop12717	NA	NA	NA	NA	NA
hsa_retrom28363	ptr_retrom09598	NA	ppy_retrop17794	NA	NA	NA	NA	NA	NA
hsairetrom11226	ptriretrom12199	ggo_retrom00900	ppyiretrom14013	NA	NA	NA	NA	NA	NA
hsa_retrop43276	ptr_retrop06858	ggoiretrop22755	ppy_retrop13613	mmu_retrop24059	NA	NA	NA	NA	NA
hsa_retrom32068	ptr_retrom08991	ggo_retrom03587	ppy_retrom15854	mmu_retrom31060	mus_retrom41298	rno_retrom00583	NA	NA	NA
hsa_retrom06331	ptr_retrom04962	ggoiretrom18359	NA	NA	NA	NA	NA	NA	NA
hsa_retrop12685	ptr_retrop03681	ggo_retrop00922	ppy_retrop07868	mmu_retrop29840	mus_retrop54112	rnoiretrop26842	mdo_retrom28157	oan_retrop133005	NA
hsa_retrom29909	ptriretrop34565	ggo_retrom04277	ppy_retrom16166	mmu_retrop32951	mus_retrom96895	rnoiretrop16398	NA	NA	NA
hsa_retrom41358	NA	ggoiretrom22540	ppyiretrom28027	mmu_retrom23028	NA	NA	NA	NA	NA
hsa_retrom05023	ptr_retrom05641	ggoiretrom21195	ppy_retrom10678	mmu_retrom15513	NA	NA	NA	NA	NA
hsa_retrop16508	NA	ggo_retrom03437	ppyiretrom10562	mmuiretrop06956	NA	rno_retrom01991	mdoiretrom21894	NA	ggairetrop07140
hsa_retrop17115	ptr_retrop02565	NA	ppy_retrop06982	NA	NA	NA	NA	NA	NA
hsa_retrom07729	ptr_retrom05121	ggo_retrom02359	ppy_retrom09850	NA	NA	NA	NA	NA	NA
hsa_retrop25534	ptr_retrop02029	ggo_retrop00425	ppy_retrop05125	mmu_retrom08800	mus_retrop112296	rnoiretrop35108	NA	NA	NA
hsa_retrop09921	ptr_retrom05920	ggo_retrop01870	ppyiretrop25395	mmuiretrop19237	NA	NA	NA	NA	NA
hsa_retrom26471	NA	ggo_retrom00046	ppy_retrom02957	NA	NA	NA	NA	NA	NA
hsa_retrop42618	ptr_retrop06730	ggoiretrop23007	ppy_retrop13315	mmu_retrop23557	NA	NA	NA	NA	NA
hsa_retrop39482	ptriretrop02716	ggoiretrop19172	ppy_retrom12256	NA	NA	NA	NA	NA	NA
hsa_retrop09820	ptr_retrom05948	ggo_retrop01847	ppy_retrop12234	mmu_retrop17936	NA	NA	NA	NA	NA
hsa_retrop08668	ptr_retrop05012	ggoiretrop17014	ppy_retrop10186	mmu_retrop15886	NA	NA	NA	NA	NA
hsa_retrop39665	ptr_retrop06510	ggoiretrop19615	ppyiretrop26965	NA	NA	NA	NA	NA	NA
hsa_retrom00065	ptr_retrom09912	NA	ppy_retrop19478	mmu_retrom36023	NA	NA	NA	NA	NA
hsa_retrom30127	ptr_retrom09260	NA	ppy_retrom16234	mmu_retrom32204	mus_retrop96975	rnoiretrop45383	mdo_retrom08393	NA	gga_retrop28515
hsa_retrop27653	ptriretrop04970	ggoiretrop00652	ppyiretrop05599	NA	NA	NA	NA	NA	NA
hsa_retrop38741	ptr_retrop07460	ggo_retrop03201	ppy_retrop14634	mmu_retrop37288	mus_retrop74711	rnoiretrop39111	mdo_retrop12081	oaniretrop11805	ggairetrop06785
hsa_retrom14185	ptriretrom10999	ggo_retrom00756	ppyiretrom12923	mmu_retrom26964	musiretrom38462	rnoiretrom36039	mdo_retrom27468	oaniretrop06229	ggairetrom03548
hsa_retrop11436	ptr_retrop04117	ggo_retrop01212	NA	mmu_retrop09478	NA	NA	NA	NA	NA
hsa_retrop28347	NA	ggoiretrop32691	NA	mmuiretrom32224	NA	NA	NA	NA	NA
hsa_retrom30410	ptr_retrom09333	ggoiretrom32382	NA	NA	NA	NA	NA	NA	NA
hsa_retrop06597	ptriretrop16360	ggo_retrop02089	NA	NA	mus_retrop89795	NA	NA	NA	NA
hsa_retrom16561	ptriretrom09365	ggoiretrop26416	ppy_retrom01828	NA	NA	NA	NA	NA	NA
hsa_retrom28484	ptr_retrom09623	ggo_retrom04049	NA	NA	NA	NA	NA	NA	NA
hsa_retrom29351	ptr_retrom09890	ggo_retrom04187	NA	NA	NA	NA	NA	NA	NA
hsa_retrom36825	ptr_retrom07664	ggo_retrom03348	ppy_retrom13989	mmuiretrom33844	NA	NA	NA	NA	NA
hsa_retrom31273	ptr_retrop08766	ggo_retrop01110	ppy_retrom15597	mmu_retrom30307	mus_retrop53005	rnoiretrop42749	mdo_retrom17040	NA	NA
hsairetrop35114	ptriretrop27961	ggo_retrop03158	NA	mmuiretrop36410	NA	NA	NA	NA	NA
hsairetrop40884	ptriretrop26091	ggo_retrop02909	NA	NA	NA	NA	NA	NA	NA
NA	ptriretrom07968	ggo_retrom00503	ppy_retrom06985	NA	NA	NA	NA	NA	NA
hsa_retrom03649	ptr_retrom10768	ggo_retrom04842	ppy_retrop18359	NA	NA	NA	NA	NA	NA
hsa_retrom40776	ptriretrom24988	ggoiretrom22447	NA	NA	NA	NA	NA	NA	NA
hsa_retrom37994	ptr_retrom06747	NA	ppy_retrom12414	NA	NA	NA	NA	NA	NA
hsa_retrop37278	ptriretrop31607	ggo_retrop03887	NA	NA	NA	NA	NA	NA	NA
hsa_retrop10363	ptr_retrom05821	ggoiretrop14594	NA	mmu_retrop18363	NA	NA	NA	NA	NA
hsa_retrop21883	ptr_retrop03904	ggo_retrop01313	NA	NA	NA	NA	NA	NA	NA
hsa_retrop14590	ptr_retrop02973	NA	ppy_retrop06561	NA	NA	NA	NA	NA	NA
NA	ptr_retrom05672	ggo_retrom01902	ppy_retrom11653	mmu_retrom15671	NA	NA	NA	NA	NA
hsa_retrom37066	ptr_retrom07668	ggoiretrom24653	ppy_retrom14005	NA	NA	NA	NA	NA	NA
hsa_retrop21972	ptr_retrop03911	ggo_retrop01319	ppy_retrom08618	NA	mus_retrom79661	rno_retrom05928	NA	NA	NA
hsa_retrop40951	ptr_retrop05946	ggo_retrop01478	ppy_retrom11135	mmu_retrom11374	mus_retrop93743	rnoiretrop36471	mdo_retrop05443	NA	NA
hsairetrom25965	ptriretrom36689	ggo_retrom04102	ppyiretrom38283	mmuiretrop33912	NA	NA	NA	NA	NA
hsa_retrom25795	ptr_retrom02085	ggo_retrom00373	NA	NA	NA	NA	NA	NA	NA
hsa_retrom38571	ptr_retrom06895	ggo_retrom02714	NA	NA	NA	NA	NA	NA	NA
hsa_retrop42608	ptr_retrop06728	ggo_retrop02725	NA	mmu_retrop23550	NA	NA	NA	NA	NA
hsa_retrop00468	ptr_retrop10345	ggo_retrop04466	ppy_retrom18571	NA	NA	NA	NA	NA	NA
hsa_retrop31295	ptr_retrop09617	ggoiretrop33550	NA	NA	NA	NA	NA	NA	NA
hsa_retrop10873	ptr_retrop05761	NA	ppy_retrop12646	mmu_retrop18840	NA	NA	NA	NA	NA
hsa_retrom25241	ptr_retrom11141	ggo_retrom01838	ppy_retrom10982	NA	NA	NA	NA	NA	NA
hsa_retrop04204	ptr_retrop10966	ggo_retrop04824	ppy_retrom17567	NA	NA	NA	NA	NA	NA
hsa_retrom10023	ptr_retrom04331	ggo_retrom01246	ppy_retrom08868	NA	NA	NA	NA	NA	NA
hsa_retrop15181	ptr_retrop03064	ggo_retrop00629	ppy_retrop06646	mmu_retrop08768	mus_retrop74286	rno_retrom00423	NA	NA	ggairetrom02121
hsa_retrop43829	ptr_retrop06968	ggo_retrop02876	ppy_retrop13793	mmu_retrop24621	mus_retrop101570	rnoiretrop30697	NA	NA	NA
hsa_retrop39739	ptr_retrop06540	NA	ppy_retrop12836	NA	NA	NA	NA	NA	NA
hsa_retrop01484	ptriretrop39346	ggoiretrop34795	NA	mmuiretrop40589	NA	NA	NA	NA	NA
hsa_retrom00679	ptr_retrom09971	ggo_retrom04471	NA	NA	NA	NA	NA	NA	NA
hsa_retrop25796	ptr_retrop02111	ggo_retrop00483	NA	mmu_retrom08459	mus_retrop112646	rnoiretrop35637	NA	oan_retrom129105	NA
hsa_retrom32294	ptr_retrom09036	ggoiretrom26992	ppy_retrom15952	mmu_retrom31333	NA	NA	NA	NA	NA
hsa_retrom04999	ptr_retrom05634	ggo_retrom02860	NA	NA	NA	NA	NA	NA	NA
hsa_retrom03320	ptr_retrom10646	ggoiretrom34037	ppy_retrop18504	NA	NA	NA	NA	NA	NA
hsa_retrom38989	ptr_retrom06107	ggo_retrom01556	ppy_retrop11483	NA	NA	NA	NA	NA	NA
hsa_retrom07532	ptr_retrom05079	ggoiretrom18077	ppyiretrop18190	NA	NA	NA	NA	NA	NA
hsa_retrom41451	ptr_retrom07047	ggoiretrom22547	ppyiretrom28090	mmu_retrom23102	mus_retrom106670	rno_retrom04332	NA	NA	NA
hsa_retrom38425	ptr_retrom06856	ggo_retrom02686	ppy_retrom12566	NA	NA	NA	NA	NA	NA
hsa_retrom28304	ptriretrom35989	ggoiretrom30737	NA	NA	NA	NA	NA	NA	NA
hsa_retrom28434	ptr_retrom09608	ggo_retrom04044	ppy_retrop17774	NA	NA	NA	NA	NA	NA
hsa_retrom28432	ptr_retrom09606	NA	NA	mmu_retrom32714	NA	NA	NA	NA	NA
hsa_retrop40095	ptr_retrop06623	NA	ppy_retrop13044	NA	NA	NA	NA	NA	NA
hsairetrom11818	ptriretrom12807	ggo_retrom00965	NA	mmuiretrom25993	NA	NA	NA	NA	NA
hsa_retrop08838	ptr_retrop05054	ggo_retrop02307	ppy_retrop10233	mmu_retrop16002	NA	NA	NA	NA	NA
NA	ptr_retrop05399	ggoiretrop20272	ppy_retrop10769	NA	NA	NA	NA	NA	NA
hsa_retrom36630	NA	ggo_retrom03323	NA	mmu_retrom35572	NA	NA	NA	NA	NA
hsa_retrop31666	ptr_retrop09685	ggo_retrop04303	ppy_retrop17472	mmu_retrop33230	mus_retrom102170	NA	NA	NA	NA
hsa_retrop41383	ptr_retrop06003	ggo_retrop01527	ppy_retrop11575	NA	NA	NA	NA	NA	NA
hsa_retrop11198	ptr_retrop04081	ggo_retrop01181	NA	NA	NA	NA	NA	NA	NA
hsa_retrop03166	ptr_retrop10690	NA	ppyiretrom40582	mmu_retrop39179	NA	NA	NA	NA	NA
hsa_retrom41732	ptr_retrom07095	ggo_retrom03013	NA	NA	NA	NA	NA	NA	NA
hsairetrop37208	ptriretrop24479	ggoiretrop20035	ppyiretrop27845	mmuiretrop23105	musiretrop08845	rnoiretrop24671	NA	NA	NA
hsa_retrom39281	ptriretrom22093	ggo_retrom01581	ppy_retrop11314	mmu_retrop13476	mus_retrom99082	rno_retrom05320	NA	NA	NA
hsa_retrop31280	ptr_retrop09612	ggo_retrop04224	ppyiretrop37262	mmu_retrop32916	NA	NA	NA	NA	NA
hsa_retrom04756	ptr_retrom05569	ggo_retrom02814	ppy_retrop10608	NA	NA	NA	NA	NA	NA
hsa_retrop32622	ptr_retrom08879	ggo_retrom01190	ppy_retrop16572	mmu_retrop30637	NA	NA	NA	NA	NA
hsa_retrom19146	NA	ggoiretrom01527	ppy_retrom03981	NA	NA	NA	NA	NA	NA
hsa_retrom34511	ptriretrom29976	ggoiretrom28048	ppy_retrom15059	NA	NA	NA	NA	NA	NA
NA	ptr_retrop05993	ggo_retrop01520	ppy_retrop11562	NA	NA	NA	NA	NA	NA
hsa_retrom40066	ptr_retrom06416	ggo_retrom01644	ppy_retrom11367	mmu_retrom11809	NA	NA	NA	NA	NA
hsa_retrop36685	ptr_retrop00692	ggoiretrop29170	ppyiretrop33749	mmu_retrop27084	NA	NA	NA	NA	NA
hsa_retrop11457	ptr_retrop04119	ggo_retrop01213	ppy_retrop09281	NA	NA	NA	NA	NA	NA
hsa_retrop24073	NA	ggo_retrop01385	ppyiretrop15993	NA	NA	NA	NA	NA	NA
hsa_retrom38391	ptr_retrom06844	NA	ppy_retrom12541	NA	NA	NA	NA	NA	NA
hsa_retrop16950	ptriretrom07749	ggo_retrop00498	ppy_retrom06910	mmu_retrop06579	mus_retrop46040	rno_retrop00678	NA	NA	NA
hsairetrop40030	ptriretrop25311	ggoiretrop21579	ppyiretrop28749	NA	NA	NA	NA	NA	NA
hsa_retrom30145	ptr_retrom09263	ggoiretrom32793	ppy_retrom16239	mmu_retrom32216	mus_retrop96971	rnoiretrop45337	NA	NA	NA
hsa_retrop25789	ptr_retrop02109	ggo_retrop00481	ppyiretrop09047	NA	NA	NA	NA	NA	NA
hsa_retrom40846	ptr_retrom06934	ggo_retrom02908	ppyiretrom27537	mmu_retrom22578	NA	NA	NA	NA	NA
hsa_retrom37888	NA	ggoiretrom19409	ppyiretrom26345	NA	NA	NA	NA	NA	NA
hsa_retrom04212	ptriretrom18724	ggo_retrom02753	NA	NA	NA	NA	NA	NA	NA
hsa_retrop25238	ptr_retrop01988	ggo_retrop00390	NA	NA	NA	NA	NA	NA	NA
hsa_retrop29160	ptriretrop36734	ggoiretrop31485	ppy_retrom16630	NA	NA	NA	NA	NA	NA
hsa_retrom35006	ptr_retrom08512	ggo_retrom03848	ppy_retrom15222	NA	NA	NA	NA	NA	NA
hsa_retrom16215	ptr_retrop02797	ggo_retrop03421	ppy_retrom06293	NA	NA	NA	NA	NA	NA
hsa_retrop31948	NA	ggo_retrop04334	NA	mmu_retrop33413	NA	NA	NA	NA	NA
hsa_retrom41695	ptriretrom25790	ggoiretrom22600	ppyiretrom28348	mmu_retrom23238	NA	NA	NA	NA	NA
hsa_retrom30504	ptriretrom34902	ggo_retrom04369	ppy_retrom16325	mmu_retrom32458	NA	NA	NA	NA	NA
hsa_retrom07189	ptr_retrom01454	ggo_retrom02287	ppy_retrop09594	NA	NA	NA	NA	NA	NA
hsa_retrom39116	ptr_retrom06131	ggo_retrom01567	NA	mmu_retrop13644	NA	NA	NA	NA	NA
hsa_retrom05363	ptr_retrom04521	ggo_retrom02120	ppy_retrop10117	mmu_retrop15725	mus_retrom91886	rno_retrom07159	mdo_retrom16003	NA	NA
hsairetrop21066	ptr_retrop03998	ggoiretrop10272	NA	NA	NA	NA	NA	NA	NA
hsa_retrop32566	ptr_retrom08903	ggo_retrom01207	NA	NA	NA	NA	NA	NA	NA
hsa_retrop01953	NA	ggoiretrop35817	ppy_retrom18089	mmu_retrop39007	NA	NA	NA	NA	NA
hsa_retrop29547	ptr_retrop10073	ggoiretrop31548	ppyiretrom36903	NA	NA	NA	NA	NA	NA
hsa_retrom09052	ptriretrop20561	ggoiretrom14645	ppyiretrom24576	mmu_retrom16034	NA	NA	NA	NA	NA
hsa_retrop23975	ptr_retrop04013	ggo_retrop01374	ppyiretrop15885	NA	NA	NA	NA	NA	NA
hsa_retrop06877	ptr_retrop04596	ggo_retrop02129	ppy_retrom09425	NA	NA	NA	NA	NA	NA
hsairetrop36830	ptriretrop24077	ggoiretrop19680	NA	NA	NA	NA	NA	NA	NA
NA	ptriretrom28702	ggoiretrom25089	ppyiretrom31041	NA	NA	NA	NA	NA	NA
hsa_retrop44095	ptr_retrop07077	ggoiretrop22294	ppy_retrop13897	NA	NA	NA	NA	NA	NA
hsa_retrop06895	ptriretrop16708	ggoiretrop16747	NA	mmuiretrom14638	NA	NA	NA	NA	NA
hsa_retrom14697	ptr_retrom03524	ggo_retrom00861	ppy_retrom07405	NA	NA	NA	NA	NA	NA
hsa_retrom03629	ptr_retrom10757	ggo_retrom04828	ppy_retrop18366	mmu_retrop40387	mus_retrom125011	rno_retrom02258	NA	NA	NA
hsa_retrom26428	ptr_retrom01857	ggo_retrom00033	NA	NA	NA	NA	NA	NA	NA
hsa_retrop37823	ptriretrop27084	ggo_retrop03040	ppyiretrom29955	mmuiretrom33737	NA	NA	NA	NA	NA
hsa_retrom01128	ptr_retrom10118	ggoiretrom34757	ppy_retrop19112	NA	NA	NA	NA	NA	NA
hsa_retrom35363	ptr_retrom08603	ggo_retrom03907	NA	NA	NA	NA	NA	NA	NA
hsa_retrop16723	ptr_retrop02897	ggo_retrom03400	ppy_retrop06394	mmu_retrop08283	NA	NA	NA	NA	NA
hsa_retrop00208	ptr_retrop10290	ggoiretrop34729	NA	NA	NA	NA	NA	NA	NA
hsa_retrom01058	ptr_retrom10098	ggo_retrom04529	NA	NA	NA	NA	NA	NA	NA
hsa_retrop01557	ptr_retrop10459	ggo_retrop04535	NA	NA	NA	NA	NA	NA	NA
hsa_retrom30082	ptr_retrom09249	ggoiretrom32349	NA	NA	NA	NA	NA	NA	NA
NA	ptr_retrop10364	ggo_retrop04472	ppy_retrom18554	NA	NA	NA	NA	NA	NA
hsa_retrom30086	ptr_retrom09250	ggoiretrom32774	ppyiretrom35948	mmu_retrom32168	NA	NA	NA	NA	NA
hsa_retrop41621	ptr_retrop06053	ggo_retrop01552	NA	NA	NA	NA	NA	NA	NA
hsa_retrom18796	ptr_retrom02515	ggo_retrom00249	NA	NA	NA	NA	NA	NA	NA
hsa_retrom10595	ptr_retrom04469	ggo_retrom01337	ppy_retrom09134	mmu_retrom08368	NA	NA	NA	NA	NA
hsa_retrop42933	ptriretrop25176	NA	ppy_retrop13477	NA	NA	NA	NA	NA	NA
hsa_retrom15096	ptriretrom10087	ggoiretrom04923	ppyiretrom11492	mmuiretrom07436	NA	NA	NA	NA	NA
hsa_retrop39709	ptr_retrop06531	ggo_retrop02426	NA	NA	NA	NA	NA	NA	NA
NA	ptr_retrop03317	ggoiretrop05464	NA	mmuiretrop26594	NA	NA	NA	NA	NA
hsa_retrop28979	ptr_retrop09926	ggoiretrop31429	NA	NA	NA	NA	NA	NA	NA
hsa_retrom35833	ptriretrom27158	ggoiretrom24020	ppyiretrop30714	NA	NA	NA	NA	NA	NA
hsa_retrom34525	ptr_retrom08390	ggo_retrom03775	ppy_retrom15061	mmu_retrom25906	mus_retrom43546	rno_retrop02493	NA	NA	NA
hsa_retrop06781	ptr_retrop04579	ggo_retrop02114	NA	mmu_retrom13182	NA	NA	NA	NA	NA
NA	ptr_retrom01451	ggo_retrom02285	ppy_retrop09607	mmu_retrop14265	NA	NA	NA	NA	NA
hsa_retrom30469	ptriretrom34871	NA	ppyiretrom36338	NA	mus_retrop73764	rno_retrom00957	NA	NA	NA
hsa_retrop31133	ptr_retrop09574	ggo_retrop04200	ppy_retrop17264	NA	NA	NA	NA	NA	NA
hsa_retrop43260	NA	ggo_retrop02794	ppy_retrop13607	NA	NA	NA	NA	NA	NA
hsa_retrom31598	ptr_retrop08711	ggo_retrom03524	NA	NA	NA	NA	NA	NA	NA
hsa_retrom00231	ptr_retrom09934	ggoiretrom34607	NA	NA	NA	NA	NA	NA	NA
hsa_retrop12862	ptr_retrop03735	ggo_retrop00954	NA	NA	NA	NA	NA	NA	NA
hsa_retrop09214	ptriretrop19565	ggoiretrop15775	ppyiretrop24555	NA	NA	NA	NA	NA	NA
NA	ptr_retrop02050	ggo_retrop00437	ppy_retrop05166	mmu_retrom08735	NA	NA	NA	NA	NA
hsa_retrom42328	ptr_retrom07217	ggo_retrom03076	ppy_retrom13293	NA	NA	NA	NA	NA	NA
hsa_retrop11662	ptr_retrop04188	ggoiretrop09167	ppyiretrop17863	mmuiretrop09272	NA	NA	NA	NA	NA
hsairetrom30547	ptriretrom29195	NA	ppyiretrom31415	mmuiretrom23007	NA	NA	NA	NA	NA
hsa_retrop04949	ptriretrop18431	ggoiretrop20501	NA	mmu_retrop16524	NA	NA	NA	NA	NA
hsa_retrop25503	ptriretrop05594	ggo_retrop00417	ppyiretrop08464	mmu_retrop10339	mus_retrop112192	rnoiretrop34937	NA	NA	NA
hsa_retrom27453	ptr_retrom09446	ggo_retrom03958	NA	mmu_retrom34358	NA	NA	NA	NA	NA
hsa_retrom40450	ptriretrom22865	ggoiretrom11667	ppy_retrom11527	NA	NA	NA	NA	NA	NA
hsa_retrop12530	ptriretrop12737	ggoiretrop06624	ppy_retrop07801	mmu_retrop29648	NA	NA	NA	NA	NA
hsairetrop21077	ptr_retrop04000	ggo_retrop01362	ppyiretrop15798	mmuiretrop20924	mus_retrop113049	rno_retrop02522	mdoiretrom04110	NA	ggairetrom06696
hsa_retrom37897	ptr_retrom06729	ggoiretrom20545	NA	NA	NA	NA	NA	NA	NA
hsa_retrom09550	ptr_retrom06003	ggoiretrom14277	NA	NA	NA	NA	NA	NA	NA
hsairetrom24922	ptriretrom35519	ggo_retrom03983	ppyiretrop39469	mmuiretrop33815	NA	NA	NA	NA	NA
hsa_retrom27210	ptriretrom05050	ggo_retrom00137	ppy_retrom02856	mmu_retrom09603	mus_retrom46474	rnoiretrom24409	NA	NA	NA
hsa_retrop16540	ptr_retrop02846	ggoiretrom26155	ppy_retrom06366	mmu_retrop07881	NA	NA	NA	NA	NA
hsa_retrop38771	ptr_retrop07464	ggo_retrop03205	NA	NA	NA	NA	NA	NA	NA
hsa_retrop05841	ptr_retrop05414	ggoiretrop20437	ppy_retrop10794	NA	NA	NA	NA	NA	NA
hsa_retrop37919	ptr_retrop07284	ggo_retrop03074	ppy_retrop14308	mmu_retrop36525	NA	NA	NA	NA	NA
hsa_retrop03142	ptriretrop40369	ggoiretrop35907	NA	mmuiretrop38713	NA	NA	NA	NA	NA
hsa_retrop44028	ptr_retrop07048	ggo_retrop02905	NA	NA	NA	NA	NA	NA	NA
hsairetrop14014	ptriretrop11651	ggo_retrop00799	ppyiretrop13704	NA	NA	NA	NA	NA	NA
hsa_retrop32758	ptr_retrom08843	ggo_retrom01161	NA	NA	NA	NA	NA	NA	NA
hsa_retrop43983	ptriretrop25996	ggoiretrop21643	ppy_retrop13837	mmu_retrop24730	NA	NA	NA	NA	NA
hsa_retrop43981	ptriretrop25985	ggo_retrop02893	ppy_retrop13834	NA	NA	NA	NA	NA	NA
hsa_retrom38240	ptr_retrom06821	ggo_retrom02661	ppyiretrom26748	mmu_retrom21300	NA	NA	NA	NA	NA
hsa_retrop43672	ptr_retrop06937	ggoiretrop22208	ppyiretrop29136	NA	NA	NA	NA	NA	NA
hsa_retrom40913	ptr_retrom06947	ggo_retrom02915	ppy_retrom12826	NA	NA	NA	NA	NA	NA
hsa_retrom34228	ptriretrom29526	ggo_retrom03729	NA	NA	NA	NA	NA	NA	NA
hsa_retrom28857	ptriretrom36736	NA	ppy_retrom17100	mmu_retrop35390	NA	NA	NA	NA	NA
hsa_retrom34533	ptriretrom30014	ggo_retrom03778	ppy_retrom15071	NA	NA	NA	NA	NA	NA
NA	ptr_retrom03080	ggo_retrop01058	ppy_retrop06125	NA	NA	NA	NA	NA	NA
hsa_retrop01768	ptr_retrop10512	ggo_retrop04567	ppy_retrom18165	NA	NA	NA	NA	NA	NA
hsa_retrop04071	ptriretrop41652	ggo_retrop04806	NA	NA	NA	NA	NA	NA	NA
hsa_retrom16489	ptr_retrop02712	ggo_retrop03353	NA	NA	NA	NA	NA	NA	NA
hsa_retrop43189	NA	ggo_retrop02787	ppy_retrop13587	NA	mus_retrop100895	NA	NA	NA	NA
hsa_retrom15334	ptr_retrop03053	ggo_retrom00637	NA	NA	NA	NA	NA	NA	NA
hsa_retrop13720	ptr_retrop03230	ggo_retrop00755	NA	NA	NA	NA	NA	NA	NA
hsa_retrop13726	ptr_retrop03233	ggo_retrop00757	ppy_retrop07231	NA	NA	NA	NA	NA	NA
hsa_retrop00223	NA	ggo_retrop04437	ppy_retrom18637	NA	NA	NA	NA	NA	NA
hsairetrop15954	ptriretrom09033	ggoiretrom27377	ppyiretrop10566	mmuiretrop07301	musiretrom14733	rnoiretrom12969	mdo_retrop05408	NA	NA
hsa_retrom11235	ptriretrom12424	ggo_retrom00922	ppy_retrom07619	mmu_retrom28576	mus_retrom50460	rno_retrom03633	NA	NA	NA
hsairetrom30555	ptriretrom29203	ggo_retrom03687	ppyiretrom31424	mmuiretrom23008	NA	NA	NA	NA	NA
hsa_retrom27115	ptr_retrom01988	ggoiretrom00519	ppy_retrom02836	mmu_retrom09555	NA	NA	NA	NA	NA
hsa_retrop16390	ptr_retrom02982	NA	NA	mmu_retrop08028	NA	NA	NA	NA	NA
hsa_retrop13389	ptr_retrop03157	ggo_retrop00694	ppy_retrop07091	mmu_retrop28095	mus_retrom91243	NA	NA	NA	NA
hsairetrop28650	ptr_retrop09757	ggoiretrop34676	NA	NA	NA	NA	NA	NA	NA
hsa_retrom27592	ptriretrom35524	ggoiretrom30626	ppyiretrop39457	mmuiretrop33178	NA	NA	NA	NA	NA
hsa_retrop03855	ptriretrop41383	ggo_retrop04767	NA	NA	NA	NA	NA	NA	NA
hsa_retrop03852	ptr_retrop10860	NA	NA	mmu_retrom38038	NA	NA	NA	NA	NA
hsairetrom22347	ptriretrom42494	ggoiretrom14059	NA	NA	NA	NA	NA	NA	NA
hsa_retrom02953	ptriretrom39947	ggo_retrom04709	ppyiretrop41475	mmu_retrom38455	NA	NA	NA	NA	NA
hsairetrom29468	ptriretrom32595	ggo_retrom03555	ppyiretrom34267	NA	NA	NA	NA	NA	NA
hsa_retrop43881	NA	ggo_retrop02883	ppy_retrop13812	mmu_retrop24639	NA	NA	NA	NA	NA
hsa_retrom14478	ptriretrom11442	ggo_retrom00811	ppy_retrom07300	NA	NA	NA	NA	NA	NA
hsa_retrom42391	ptr_retrom07231	ggo_retrom03087	NA	NA	NA	NA	NA	NA	NA
NA	ptr_retrom04291	ggo_retrom01507	ppy_retrom08474	NA	NA	NA	NA	NA	NA
hsa_retrop10387	ptr_retrom05820	ggo_retrop01927	NA	NA	NA	NA	NA	NA	NA
hsa_retrom25572	ptriretrom42492	NA	ppyiretrom22590	mmu_retrom10646	NA	NA	NA	NA	NA
hsa_retrom25378	ptriretrom42247	ggoiretrom13342	NA	NA	NA	NA	NA	NA	NA
hsa_retrom25370	ptr_retrom11185	ggo_retrom01858	NA	mmu_retrom10505	NA	NA	NA	NA	NA
hsa_retrop24723	ptr_retrop11495	NA	ppy_retrop11015	NA	NA	NA	NA	NA	NA
hsa_retrop42840	NA	ggo_retrop02766	ppy_retrop13435	mmu_retrop23801	NA	NA	NA	NA	NA
hsa_retrom16531	ptriretrom09316	ggoiretrop27177	NA	NA	NA	NA	NA	NA	NA
hsa_retrop25919	ptriretrop04275	ggo_retrop00034	NA	NA	mus_retrop49458	rno_retrop00765	NA	oan_retrom127499	NA
hsa_retrom20014	ptr_retrom02589	ggo_retrom00307	ppyiretrom07059	mmu_retrom04453	NA	NA	NA	NA	NA
hsa_retrom35780	ptr_retrom07398	NA	ppy_retrop14373	mmu_retrop36611	NA	NA	NA	NA	NA
hsairetrom38123	ptriretrom24911	ggo_retrom02886	ppy_retrom12747	NA	NA	NA	NA	NA	NA
hsa_retrop05507	ptr_retrop05345	ggo_retrop02632	NA	NA	NA	NA	NA	NA	NA
hsa_retrop24514	NA	ggoiretrop12716	ppy_retrop10878	NA	NA	NA	NA	NA	NA
hsa_retrom35552	ptriretrop26727	ggo_retrom03142	ppy_retrom13489	mmu_retrom34708	NA	NA	NA	NA	NA
hsa_retrop17556	ptriretrop06241	ggoiretrop01573	ppyiretrop06388	mmuiretrop03761	NA	NA	NA	NA	NA
NA	ptr_retrom06024	ggoiretrom14291	ppy_retrom12113	mmu_retrom16700	mus_retrop71329	rnoiretrop23994	mdo_retrom11284	NA	gga_retrom38547
hsa_retrop10601	ptr_retrop05696	ggoiretrop14266	ppy_retrop12554	NA	NA	NA	NA	NA	NA
hsa_retrop11731	ptr_retrop04198	ggo_retrop01249	NA	mmu_retrop09769	NA	NA	NA	NA	NA
hsa_retrom38992	ptr_retrom06110	ggoiretrom11434	NA	NA	NA	NA	NA	NA	NA
hsairetrop12426	ptr_retrop03723	ggoiretrop07135	ppy_retrop07913	mmu_retrop29982	NA	NA	NA	NA	NA
hsa_retrom03354	ptr_retrom10670	NA	ppy_retrop18489	NA	NA	NA	NA	NA	NA
NA	ptriretrom36222	ggoiretrom30173	ppyiretrop38782	NA	NA	NA	NA	NA	NA
hsa_retrop31978	NA	ggoiretrop33692	ppyiretrop38037	mmuiretrop32241	NA	NA	NA	NA	NA
hsairetrop39065	ptriretrop23003	ggo_retrop01597	NA	NA	NA	NA	NA	NA	NA
hsa_retrom42416	ptr_retrom07236	ggo_retrom03090	NA	mmu_retrom23904	NA	NA	NA	NA	NA
hsa_retrom22400	ptriretrom14283	ggoiretrom10965	ppyiretrop16677	NA	NA	NA	NA	NA	NA
hsa_retrop32284	ptr_retrop09803	NA	NA	mmu_retrop33777	NA	NA	NA	NA	NA
hsa_retrop24035	ptr_retrop04023	ggoiretrop10166	ppy_retrop08212	NA	NA	NA	NA	NA	NA
hsa_retrom24989	ptr_retrom11073	ggo_retrom01805	NA	mmu_retrom09986	NA	NA	NA	NA	NA
hsa_retrom01150	ptr_retrom10121	ggo_retrom04541	NA	NA	NA	NA	NA	NA	NA
hsa_retrom24818	ptriretrom41440	ggoiretrom13206	ppyiretrom21702	NA	NA	NA	NA	NA	NA
hsa_retrom22243	ptr_retrom04105	NA	ppy_retrop09029	mmu_retrom17463	NA	NA	NA	NA	NA
hsa_retrop42756	ptr_retrop06784	ggo_retrop02751	ppy_retrop13399	NA	NA	NA	NA	NA	NA
hsairetrop02210	ptriretrom39332	ggo_retrop04636	NA	mmuiretrom36589	musiretrop33273	rno_retrom06444	NA	NA	NA
hsa_retrom40933	ptr_retrom06953	NA	ppy_retrom12841	NA	NA	NA	NA	NA	NA
NA	ptr_retrom06956	ggo_retrom02919	ppy_retrom12842	mmu_retrom22730	NA	NA	NA	NA	NA
hsa_retrom40334	ptriretrom22730	ggoiretrom11876	NA	NA	NA	NA	NA	NA	NA
hsa_retrom40807	ptriretrom25048	ggo_retrom02903	NA	NA	NA	NA	NA	NA	NA
hsa_retrop43257	ptr_retrop06854	NA	ppy_retrop13606	NA	NA	NA	NA	NA	NA
NA	ptr_retrop10504	ggo_retrop04564	ppyiretrom41160	NA	NA	NA	NA	NA	NA
hsa_retrop29129	ptriretrop36682	NA	NA	mmu_retrom33018	NA	NA	NA	NA	NA
hsa_retrop38177	ptriretrop27548	ggo_retrop03126	ppy_retrom13582	mmu_retrom34889	NA	NA	NA	NA	NA
hsa_retrom14345	ptr_retrom03433	ggo_retrom00786	NA	NA	NA	NA	NA	NA	NA
hsa_retrop21106	ptr_retrop02476	ggo_retrop00378	ppy_retrop04825	mmu_retrop06436	NA	NA	NA	NA	NA
hsa_retrom16496	ptr_retrop02710	ggoiretrop28145	NA	NA	NA	NA	NA	NA	NA
hsa_retrop27853	ptr_retrop01960	ggo_retrop00163	NA	NA	NA	NA	NA	NA	NA
hsa_retrop25169	ptr_retrop11620	ggo_retrop01767	ppyiretrop22924	NA	NA	NA	NA	NA	NA
hsa_retrom42081	ptr_retrom07154	ggoiretrom22658	ppy_retrom13206	mmu_retrom23598	mus_retrom107434	rno_retrom04444	mdo_retrop00645	oaniretrom10399	gga_retrop28390
hsa_retrop34887	ptr_retrop07664	ggo_retrop03636	ppy_retrop15211	mmu_retrop25541	NA	NA	NA	NA	NA
NA	ptriretrop30572	ggo_retrop03769	ppy_retrop16092	NA	NA	NA	NA	NA	NA
NA	ptriretrom33178	ggo_retrom03618	ppyiretrom34898	NA	NA	NA	NA	NA	NA
hsa_retrop38716	ptr_retrop07449	ggo_retrop03195	NA	NA	NA	NA	NA	NA	NA
hsa_retrop31670	ptriretrop35029	ggo_retrop04304	ppy_retrop17474	NA	NA	NA	NA	NA	NA
hsa_retrom35901	ptr_retrom07411	ggoiretrom24439	ppy_retrop14332	mmuiretrop35561	NA	NA	NA	NA	NA
NA	ptr_retrom02049	ggo_retrom00352	ppy_retrop05111	NA	NA	NA	NA	NA	NA
hsa_retrop14731	ptr_retrop02995	ggoiretrop04374	ppyiretrop11763	NA	NA	NA	NA	NA	NA
hsa_retrop42848	ptriretrop25045	ggoiretrop22093	NA	NA	NA	NA	NA	NA	NA
hsa_retrop04903	ptr_retrop05238	ggo_retrop02547	ppy_retrop10495	NA	NA	NA	NA	NA	NA
hsa_retrop32855	ptr_retrom08829	ggoiretrom08292	NA	NA	NA	NA	NA	NA	NA
hsairetrop03487	ptriretrop41627	ggo_retrop04804	ppy_retrom17624	mmu_retrom38977	mus_retrop74469	NA	mdoiretrop21616	oan_retrop125959	gga_retrop28789
hsa_retrom32146	ptr_retrom09007	ggoiretrom27671	ppy_retrom15891	mmu_retrom31160	mus_retrop46015	rno_retrop00664	mdoiretrom29674	NA	gga_retrop25589
hsa_retrom29757	ptr_retrop09651	ggoiretrom32317	ppy_retrop17351	NA	NA	NA	NA	NA	NA
hsa_retrom10298	NA	ggo_retrom01286	ppy_retrom08975	NA	NA	NA	NA	NA	NA
hsa_retrom05384	NA	ggo_retrom02121	ppy_retrop10098	mmu_retrom13785	NA	NA	NA	NA	NA
hsairetrom16437	ptriretrop08528	ggoiretrop27891	NA	NA	NA	NA	NA	NA	NA
hsairetrom16610	ptriretrom09369	ggoiretrop26041	ppy_retrom01843	NA	NA	NA	NA	NA	NA
hsa_retrom40893	ptriretrom25110	ggo_retrom02913	ppy_retrom12816	NA	NA	NA	NA	NA	NA
hsa_retrom28835	ptr_retrom09760	ggoiretrom31439	NA	NA	NA	NA	NA	NA	NA
hsa_retrop16765	ptriretrop09761	NA	ppy_retrop06412	mmu_retrop08308	NA	NA	NA	NA	NA
hsa_retrom30261	NA	ggo_retrom04330	ppy_retrom16256	NA	NA	NA	NA	NA	NA
hsairetrom13373	ptriretrom11099	ggoiretrom05139	ppy_retrom07213	NA	NA	NA	NA	NA	NA
hsairetrom02919	ptriretrom40319	ggoiretrom36911	NA	NA	NA	NA	NA	NA	NA
hsa_retrom34651	ptriretrom03045	NA	ppy_retrom15101	NA	NA	NA	NA	NA	NA
hsa_retrop00372	ptr_retrop10322	ggo_retrop04453	ppy_retrom18600	mmu_retrop38007	mus_retrom99763	NA	mdo_retrop15960	NA	NA
hsa_retrop00375	ptr_retrop10324	ggo_retrop04454	NA	mmu_retrop38023	NA	NA	NA	NA	NA
hsa_retrop32075	ptriretrop35515	ggo_retrop04366	ppy_retrop17599	NA	NA	NA	NA	NA	NA
hsairetrop18158	ptriretrop06452	ggoiretrop02102	NA	NA	NA	NA	NA	NA	NA
hsa_retrop34597	ptr_retrop09480	ggo_retrop03593	NA	mmu_retrop32167	mus_retrom59026	rnoiretrom12303	NA	NA	NA
hsa_retrop12913	NA	ggo_retrop00958	ppy_retrop07948	mmu_retrop30022	mus_retrop54154	rnoiretrop27011	mdo_retrop27685	oan_retrop81589	gga_retrom35658
hsa_retrop36514	ptr_retrop08412	ggo_retrop03756	NA	NA	NA	NA	NA	NA	NA
hsa_retrop36516	ptr_retrop08414	ggo_retrop03757	NA	mmu_retrop26838	NA	NA	NA	NA	NA
hsa_retrom40816	ptriretrom25056	ggo_retrom02905	NA	NA	NA	NA	NA	NA	NA
hsairetrom15182	ptriretrom10580	ggoiretrom04765	ppyiretrom11888	mmuiretrom07379	NA	NA	NA	NA	NA
hsa_retrop01739	NA	ggo_retrop04562	NA	mmuiretrop38607	NA	NA	NA	NA	NA
hsa_retrop25974	ptriretrop04360	ggoiretrop00347	ppyiretrop06131	NA	NA	NA	NA	NA	NA
hsairetrom38481	ptriretrom25271	ggoiretrom23099	NA	mmu_retrom22795	NA	NA	NA	NA	NA
hsairetrom31721	ptr_retrom08461	ggoiretrom28107	NA	mmuiretrom22853	NA	NA	NA	NA	NA
hsa_retrop12821	ptriretrop13081	ggo_retrop00943	NA	NA	NA	NA	NA	NA	NA
hsa_retrop16833	ptr_retrom02757	ggo_retrop00487	ppy_retrom06949	mmu_retrom05467	mus_retrom41057	rno_retrom00516	NA	NA	NA
hsa_retrop13713	ptriretrop11310	ggo_retrop00753	NA	NA	NA	NA	NA	NA	NA
hsa_retrom38146	ptr_retrom06803	ggoiretrom19466	NA	NA	NA	NA	NA	NA	NA
hsa_retrom11599	ptr_retrom03803	ggo_retrom00991	ppy_retrom07825	NA	NA	NA	NA	NA	NA
hsa_retrop17968	ptr_retrop02223	ggo_retrop00211	NA	NA	NA	NA	NA	NA	NA
hsa_retrom35690	ptr_retrom07372	NA	ppy_retrop14437	NA	NA	NA	NA	NA	NA
hsa_retrom04289	ptr_retrom05511	ggo_retrom02760	ppy_retrom10418	mmu_retrom14788	musiretrop24940	rnoiretrop41572	NA	NA	NA
hsa_retrop38346	ptr_retrop07397	ggo_retrop03146	ppy_retrom13840	NA	NA	NA	NA	NA	NA
hsa_retrom28645	ptriretrom36440	ggo_retrom04075	ppyiretrop38578	mmu_retrop18596	mus_retrop78825	rnoiretrop41183	mdo_retrom07458	oan_retrop127541	NA
hsairetrom39463	NA	ggoiretrom23748	ppyiretrom28681	NA	musiretrom36849	rno_retrom04443	NA	NA	NA
hsa_retrom03035	ptr_retrom10572	ggoiretrom35045	ppy_retrop18622	NA	NA	NA	NA	NA	NA
hsa_retrom32083	ptr_retrom08993	ggoiretrom26948	ppy_retrom15857	NA	NA	NA	NA	NA	NA
hsa_retrop17190	ptr_retrop02579	ggoiretrop03726	ppy_retrop07017	mmu_retrop06908	NA	NA	NA	NA	NA
hsa_retrom42229	ptriretrom26179	ggo_retrom03064	ppyiretrom28823	NA	NA	NA	NA	NA	NA
hsa_retrom35607	ptriretrom26812	ggoiretrom24377	NA	NA	NA	NA	NA	NA	NA
hsa_retrom28497	ptriretrom36256	ggoiretrom30177	NA	NA	NA	NA	NA	NA	NA
hsa_retrom29856	ptr_retrop09634	ggo_retrom04269	ppy_retrom16145	NA	NA	NA	NA	NA	NA
hsa_retrom02854	ptriretrom39804	ggo_retrom04693	ppy_retrop18694	mmu_retrom37830	NA	NA	NA	NA	NA
hsairetrom38708	ptriretrom25424	ggoiretrom23127	ppy_retrom12945	NA	NA	NA	NA	NA	NA
hsa_retrop43557	ptr_retrop06911	ggo_retrop02834	ppy_retrop13699	mmu_retrop24354	mus_retrop101020	NA	NA	NA	NA
hsa_retrop40257	ptr_retrop06662	ggo_retrop02510	NA	mmu_retrop22935	NA	NA	NA	NA	NA
NA	ptr_retrop08422	ggo_retrop03768	ppyiretrop33567	mmu_retrop26896	NA	NA	NA	NA	NA
hsa_retrop32010	ptr_retrop09748	ggo_retrop04353	NA	NA	NA	NA	NA	NA	NA
hsa_retrom22262	ptriretrom14062	ggo_retrom01402	ppyiretrop16855	mmu_retrom17528	mus_retrom43922	rno_retrom03501	NA	NA	NA
hsa_retrom25011	ptr_retrom11078	ggoiretrom13261	ppy_retrom10893	NA	NA	NA	NA	NA	NA
hsa_retrop44318	ptr_retrop07143	ggo_retrop02952	ppy_retrop14017	mmu_retrop25194	mus_retrop100263	NA	NA	NA	NA
hsa_retrop25540	ptriretrop05662	ggoiretrop02983	ppyiretrop08662	mmuiretrom08811	musiretrop37999	rnoiretrop35160	NA	NA	ggairetrop01281
hsa_retrop24919	ptr_retrop11529	NA	NA	mmu_retrop12588	NA	NA	NA	NA	NA
hsa_retrom15613	ptr_retrom03320	ggoiretrom04467	ppyiretrom11959	mmuiretrom06988	musiretrom21215	NA	mdoiretrom26968	oaniretrom09488	ggairetrom02117
hsa_retrom41024	ptr_retrom06968	NA	ppy_retrom12869	NA	NA	NA	NA	NA	NA
hsa_retrop09561	ptriretrop19940	ggoiretrop13938	ppyiretrop24905	NA	NA	NA	NA	NA	NA
hsa_retrop31346	ptr_retrom09202	NA	ppyiretrom35523	NA	NA	NA	NA	NA	NA
hsa_retrom00917	ptr_retrom10047	ggo_retrom04511	ppy_retrop19215	NA	NA	NA	NA	NA	NA
hsa_retrom37911	ptr_retrom06730	ggo_retrom02579	NA	NA	NA	NA	NA	NA	NA
hsa_retrop29816	ptr_retrop10129	ggo_retrop04093	NA	NA	NA	NA	NA	NA	NA
hsa_retrop28075	ptr_retrop09857	ggoiretrop31357	ppy_retrom16997	NA	NA	NA	NA	NA	NA
hsa_retrop06776	ptr_retrop04578	ggo_retrop02113	ppy_retrom09452	NA	NA	NA	NA	NA	NA
hsa_retrom11222	ptr_retrom03696	ggo_retrom00921	ppy_retrom07616	mmuiretrom24356	NA	NA	NA	NA	NA
hsa_retrop30348	ptr_retrop10227	ggo_retrop04164	NA	NA	NA	NA	NA	NA	NA
hsa_retrom32073	ptriretrom32891	ggo_retrom03588	ppy_retrom15855	mmu_retrom31065	musiretrom03116	rnoiretrom03774	NA	NA	NA
hsa_retrop24982	ptr_retrop11545	ggoiretrop12646	NA	NA	NA	NA	NA	NA	NA
hsa_retrom29711	ptriretrop34886	ggoiretrom32669	ppy_retrom16063	mmuiretrom29276	musiretrom28926	rno_retrop02315	NA	NA	NA
hsa_retrom37778	ptr_retrom06693	ggo_retrom02553	NA	NA	NA	NA	NA	NA	NA
hsairetrom27068	ptr_retrop09665	ggo_retrom04229	ppyiretrom35392	mmuiretrom29751	mus_retrom96655	rno_retrop02312	mdoiretrop07653	NA	ggairetrop04230
hsa_retrom02867	ptriretrom39830	ggoiretrom35006	ppy_retrop18685	mmuiretrom35880	NA	NA	NA	NA	NA
hsa_retrom10183	ptr_retrom04388	ggo_retrom01274	ppy_retrom08940	mmu_retrom07763	NA	NA	NA	NA	NA
hsa_retrom09522	ptr_retrom05994	ggo_retrom02024	NA	NA	NA	NA	NA	NA	NA
hsa_retrop03388	NA	ggo_retrop04681	ppy_retrom17882	NA	NA	NA	NA	NA	NA
hsa_retrom01340	NA	ggoiretrom37118	NA	mmu_retrom36990	NA	NA	NA	NA	NA
NA	ptr_retrop03261	ggo_retrop00777	NA	mmu_retrop28491	NA	NA	NA	NA	NA
hsa_retrom25488	ptr_retrom11204	ggo_retrom01875	NA	mmu_retrom10625	NA	NA	NA	NA	NA
hsa_retrom22382	ptriretrom14265	ggo_retrom01421	NA	NA	NA	NA	NA	NA	NA
hsa_retrop39506	NA	ggo_retrop02393	ppyiretrop26787	NA	NA	NA	NA	NA	NA
hsa_retrom14617	ptriretrom11693	ggoiretrom06179	ppyiretrom13530	NA	NA	NA	NA	NA	NA
hsairetrom10459	ptriretrom15367	ggoiretrom09776	ppyiretrom17224	NA	NA	NA	NA	NA	NA
NA	NA	ggoiretrop35672	ppyiretrom41629	mmuiretrop38515	NA	NA	NA	NA	NA
hsa_retrop16929	ptr_retrom02738	ggo_retrop00496	ppy_retrom06920	mmu_retrom05409	mus_retrom43775	rno_retrom02690	NA	NA	NA
hsa_retrop43423	NA	ggo_retrop02817	ppy_retrop13659	mmu_retrop24263	mus_retrop100933	rnoiretrop30074	NA	NA	NA
hsa_retrom31774	ptr_retrom08923	ggoiretrom26332	ppy_retrom15728	mmu_retrom30779	NA	NA	NA	NA	NA
hsa_retrop27774	ptriretrop05096	ggo_retrop00151	NA	NA	NA	NA	NA	NA	NA
hsa_retrom34297	ptriretrom29621	ggoiretrom28334	ppyiretrom31841	mmuiretrom22384	NA	NA	NA	NA	NA
hsa_retrop39197	ptr_retrop07621	ggoiretrop25397	NA	mmu_retrop37688	NA	NA	NA	NA	NA
NA	NA	ggo_retrom00696	ppyiretrom11931	mmu_retrom07504	NA	NA	NA	NA	NA
hsairetrom05340	ptr_retrom04531	ggoiretrom17102	NA	NA	NA	NA	NA	NA	NA
hsairetrop12494	ptriretrop13174	ggo_retrop00952	ppyiretrop15070	NA	NA	NA	NA	NA	NA
hsa_retrom24408	ptr_retrom04300	ggo_retrom01511	ppyiretrom15898	NA	NA	NA	NA	NA	NA
hsa_retrop09492	ptr_retrop05488	ggo_retrop01805	NA	NA	NA	NA	NA	NA	NA
hsa_retrop04154	ptr_retrop10947	ggo_retrop04816	NA	NA	NA	NA	NA	NA	NA
hsa_retrom04822	ptriretrom19252	ggo_retrom02825	NA	mmu_retrop16741	NA	NA	NA	NA	NA
hsa_retrom28183	ptr_retrom09526	ggo_retrom04014	NA	NA	NA	NA	NA	NA	NA
hsa_retrop25733	ptr_retrop02087	ggo_retrop00473	NA	NA	NA	NA	NA	NA	NA
hsairetrom00318	ptriretrom37707	NA	NA	mmu_retrom36112	NA	NA	NA	NA	NA
hsa_retrom36198	ptr_retrom07523	ggo_retrom03268	ppy_retrop14239	mmu_retrop36393	mus_retrom97507	rno_retrop00105	mdo_retrop25563	NA	gga_retrop31095
hsairetrom11945	ptriretrom12978	ggo_retrom00979	NA	NA	NA	NA	NA	NA	NA
hsa_retrop01894	ptriretrom39231	ggoiretrop35804	ppy_retrom18116	NA	NA	NA	NA	NA	NA
hsa_retrop21562	ptriretrop13957	ggoiretrop09980	ppyiretrom16617	NA	NA	NA	NA	NA	NA
hsa_retrop33264	ptr_retrop08877	ggo_retrop03481	ppy_retrop16805	mmuiretrop30551	mus_retrop45861	rno_retrop00642	NA	NA	NA
NA	ptriretrop32150	ggo_retrop01074	ppy_retrom15666	NA	NA	NA	NA	NA	NA
hsa_retrop36050	ptr_retrop08218	ggo_retrop03705	NA	NA	NA	NA	NA	NA	NA
hsa_retrom14423	ptr_retrom03451	ggo_retrom00801	NA	mmuiretrom24514	NA	NA	NA	NA	NA
hsa_retrom40848	ptr_retrom06937	ggo_retrom02909	NA	mmu_retrom22588	mus_retrom106418	rno_retrom04297	NA	NA	NA
hsa_retrom02985	ptr_retrom10551	NA	NA	mmu_retrom38471	NA	NA	NA	NA	NA
hsa_retrom35513	ptr_retrom07329	ggo_retrom03138	ppy_retrom13480	mmu_retrom34686	mus_retrom97643	rno_retrop00066	NA	NA	NA
hsa_retrop41275	ptriretrop22204	ggo_retrop01506	NA	mmu_retrop13721	musiretrom03012	rnoiretrom53961	NA	NA	NA
hsa_retrop34837	ptr_retrop07652	ggoiretrop29610	NA	NA	NA	NA	NA	NA	NA
hsa_retrom40349	ptriretrom22766	ggoiretrom11488	NA	mmuiretrop12468	mus_retrom98541	rno_retrom05235	NA	NA	NA
hsa_retrom41888	ptr_retrom07118	NA	ppy_retrom13133	NA	NA	NA	NA	NA	NA
hsa_retrom26821	ptr_retrom01945	NA	ppyiretrom04870	NA	NA	NA	NA	NA	NA
NA	ptr_retrop04087	ggo_retrop01183	ppy_retrop09192	mmu_retrop09338	NA	NA	NA	NA	NA
hsa_retrom42510	ptr_retrom07250	ggoiretrom22732	ppyiretrom29117	mmu_retrom23963	NA	NA	NA	NA	NA
hsa_retrop12921	ptriretrop13224	ggoiretrop06702	NA	NA	NA	NA	NA	NA	NA
hsa_retrop08625	ptr_retrop04999	ggoiretrop17006	ppyiretrop19770	NA	NA	NA	NA	NA	NA
hsa_retrop03635	ptr_retrop10813	ggo_retrop04719	ppy_retrom17794	mmu_retrom38327	NA	NA	NA	NA	NA
hsa_retrop27767	ptr_retrop01937	ggo_retrop00150	ppy_retrop03024	mmu_retrop11779	mus_retrop91945	rno_retrom02477	mdo_retrop21021	oan_retrop119743	gga_retrom34034
hsairetrop12711	ptriretrop13417	ggo_retrop00979	ppy_retrop07998	mmuiretrop27607	NA	NA	NA	NA	NA
hsa_retrom38001	ptr_retrom06750	ggoiretrom19438	NA	NA	NA	NA	NA	NA	NA
hsa_retrom11073	NA	ggo_retrom00904	NA	mmu_retrom28413	NA	NA	NA	NA	NA
hsairetrop38802	ptriretrop22733	ggo_retrop01569	ppyiretrop24148	NA	NA	NA	NA	NA	NA
hsairetrom19599	ptriretrom13697	ggoiretrom10045	NA	NA	NA	NA	NA	NA	NA
hsairetrom36795	NA	ggoiretrom12591	ppyiretrop23170	mmuiretrop13680	NA	NA	NA	NA	NA
hsa_retrop37034	ptriretrop31265	ggo_retrop03848	ppyiretrop34239	mmu_retrom26672	NA	NA	NA	NA	NA
hsa_retrom31342	ptr_retrop08752	ggo_retrop01100	ppy_retrom15625	NA	NA	NA	NA	NA	NA
hsa_retrop06713	ptr_retrop04560	NA	NA	mmu_retrom13259	NA	NA	NA	NA	NA
hsa_retrom00242	ptr_retrom09936	ggo_retrom04440	ppyiretrop43471	NA	NA	NA	NA	NA	NA
hsa_retrom00154	ptr_retrom09926	ggo_retrom04429	ppy_retrop19460	mmu_retrom36095	NA	NA	NA	NA	NA
hsa_retrop38646	ptr_retrop07430	ggoiretrop24697	ppy_retrop14552	NA	NA	NA	NA	NA	NA
hsairetrom21302	ptriretrom41337	ggo_retrom01767	NA	NA	NA	NA	NA	NA	NA
hsairetrop40022	ptriretrop25305	ggo_retrop02800	ppy_retrop13617	mmu_retrop24072	mus_retrop101970	rno_retrom04200	NA	NA	NA
NA	NA	ggo_retrop03207	ppyiretrop31583	mmu_retrop37312	NA	NA	NA	NA	NA
hsa_retrop10433	ptr_retrom05808	ggo_retrop01932	ppy_retrop12487	NA	NA	NA	NA	NA	NA
hsairetrop10644	ptriretrop15155	ggoiretrop09639	ppyiretrop17378	NA	musiretrop30372	NA	NA	NA	NA
hsa_retrom28602	ptr_retrom09675	ggo_retrom04068	ppyiretrop38637	mmu_retrom32835	musiretrop06657	rnoiretrom05421	NA	NA	NA
hsa_retrom02881	NA	ggo_retrom04699	NA	mmu_retrom38394	NA	NA	NA	NA	NA
hsa_retrop21537	ptr_retrop03835	ggo_retrop01268	ppy_retrom08819	NA	NA	NA	NA	NA	NA
hsairetrom38844	ptriretrom25519	ggoiretrom22064	ppyiretrom28070	NA	NA	NA	NA	NA	NA
hsa_retrom25939	ptriretrom05729	ggoiretrom02718	ppy_retrom05076	NA	NA	NA	NA	NA	NA
NA	ptr_retrom05134	ggo_retrom02367	ppy_retrom09870	NA	NA	NA	NA	NA	NA
hsa_retrop41358	ptr_retrop05995	ggo_retrop01521	NA	NA	NA	NA	NA	NA	NA
NA	ptriretrom34880	ggoiretrom32860	ppyiretrom36349	NA	NA	NA	NA	NA	NA
NA	ptriretrop19793	ggo_retrop01796	NA	mmu_retrop17679	NA	NA	NA	NA	NA
NA	ptriretrop40025	ggoiretrom33928	ppyiretrop42191	NA	NA	NA	NA	NA	NA
NA	ptriretrom06880	ggo_retrom00252	ppy_retrom03833	NA	NA	NA	NA	NA	NA
NA	ptriretrom40523	ggoiretrom35112	ppyiretrop40922	NA	NA	NA	NA	NA	NA
NA	ptr_retrom10269	ggoiretrop35796	ppy_retrom18133	mmuiretrop38646	NA	NA	NA	NA	NA
NA	ptriretrop12804	ggoiretrop06634	ppyiretrop14773	mmu_retrop29746	NA	NA	NA	NA	NA
NA	ptr_retrop08668	ggoiretrom08398	ppyiretrop34833	NA	NA	NA	NA	NA	NA
NA	NA	NA	NA	NA	mus_retrom100099	rno_retrom05499	mdo_retrop16117	NA	gga_retrom39850
NA	NA	NA	NA	NA	mus_retrom79426	rno_retrom05901	NA	NA	NA
NA	NA	NA	NA	NA	musiretrom35073	rnoiretrop28730	NA	NA	NA
NA	NA	NA	NA	NA	mus_retrom124369	rno_retrom02639	NA	NA	NA
NA	NA	NA	NA	NA	mus_retrop114705	rno_retrop02235	NA	NA	NA
NA	NA	NA	NA	NA	mus_retrop55007	rno_retrop02443	NA	NA	NA
NA	NA	NA	NA	NA	mus_retrop98169	rno_retrom04166	NA	NA	NA
NA	NA	NA	NA	NA	musiretrom25841	rnoiretrom51123	NA	NA	NA
NA	NA	NA	NA	NA	mus_retrom72520	rno_retrop00448	NA	NA	NA
NA	NA	NA	NA	NA	mus_retrop100900	rnoiretrom31144	NA	NA	NA
NA	NA	NA	NA	NA	mus_retrop45643	rno_retrop00610	NA	NA	NA
NA	NA	NA	NA	NA	mus_retrop93365	rnoiretrop36353	NA	NA	NA
NA	NA	NA	NA	NA	mus_retrom90513	rno_retrom06929	NA	NA	NA
NA	NA	NA	NA	NA	mus_retrom108053	rnoiretrop29372	NA	NA	NA
NA	NA	NA	NA	NA	musiretrom35009	rnoiretrop29325	NA	NA	NA
NA	NA	NA	NA	NA	mus_retrom103568	rnoiretrop28782	NA	NA	NA
NA	NA	NA	NA	NA	mus_retrom70030	rnoiretrom23321	NA	NA	NA
NA	NA	NA	NA	NA	mus_retrom40704	rnoiretrom54032	NA	NA	NA
NA	NA	NA	NA	NA	mus_retrop100839	rnoiretrop29810	NA	NA	NA
NA	NA	NA	NA	NA	musiretrop19621	rnoiretrop01976	NA	NA	NA
NA	NA	NA	NA	NA	musiretrom13624	rno_retrop01940	NA	NA	NA
NA	NA	NA	NA	NA	mus_retrop98507	rno_retrom04139	NA	NA	NA
NA	NA	NA	NA	NA	mus_retrom42194	rnoiretrop46431	NA	NA	NA
NA	NA	NA	NA	NA	mus_retrop53990	rnoiretrop26572	NA	NA	NA
NA	NA	NA	NA	NA	musiretrom34214	rnoiretrom46079	NA	NA	NA
NA	NA	NA	NA	NA	mus_retrop53974	rnoiretrop26500	NA	NA	NA
NA	NA	NA	NA	NA	mus_retrom80482	rnoiretrop46976	NA	NA	NA
NA	NA	NA	NA	NA	mus_retrom101410	rno_retrom06438	NA	NA	NA
NA	NA	NA	NA	NA	mus_retrom69527	rno_retrop00249	NA	NA	NA
NA	NA	NA	NA	NA	mus_retrom79905	rno_retrom05963	NA	NA	NA
NA	NA	NA	NA	NA	mus_retrom100617	rno_retrom06289	NA	NA	NA
NA	NA	NA	NA	NA	mus_retrom59282	rno_retrom01825	NA	NA	NA
NA	NA	NA	NA	NA	musiretrop03405	rnoiretrop04195	NA	NA	NA
NA	NA	NA	NA	NA	mus_retrop44349	rnoiretrop51865	NA	NA	NA
NA	NA	NA	NA	NA	musiretrom28553	rno_retrop00117	NA	NA	NA
NA	NA	NA	NA	NA	mus_retrop92527	rno_retrom02354	NA	NA	NA
NA	NA	NA	NA	NA	mus_retrom100537	rno_retrom06277	NA	NA	NA
NA	NA	NA	NA	NA	mus_retrop50179	rnoiretrop25027	NA	NA	NA
NA	NA	NA	NA	NA	musiretrom03960	rnoiretrom04072	NA	NA	NA
NA	NA	NA	NA	NA	musiretrop34327	rno_retrom04137	NA	NA	NA
NA	NA	NA	NA	NA	musiretrop34559	rnoiretrop30799	NA	NA	NA
NA	NA	NA	NA	NA	mus_retrom101969	rnoiretrop45316	NA	NA	NA
NA	NA	NA	NA	NA	mus_retrop91832	rno_retrom05517	NA	NA	NA
NA	NA	NA	NA	NA	mus_retrom107691	rno_retrom04213	NA	NA	NA
NA	NA	NA	NA	NA	mus_retrom72541	rno_retrop00449	NA	NA	NA
NA	NA	NA	NA	NA	mus_retrop46229	rno_retrop00703	NA	NA	NA
NA	NA	NA	NA	NA	mus_retrop45870	rno_retrop00645	NA	NA	NA
NA	NA	NA	NA	NA	mus_retrop76052	rnoiretrop39959	NA	NA	NA
NA	NA	NA	NA	NA	musiretrom03954	rnoiretrom03962	NA	NA	NA
NA	NA	NA	NA	NA	mus_retrom42698	rno_retrom03206	NA	NA	NA
NA	NA	NA	NA	NA	musiretrom22866	rno_retrom05705	NA	NA	NA
NA	NA	NA	NA	NA	mus_retrop98255	rno_retrom04152	NA	NA	NA
NA	NA	NA	NA	NA	mus_retrom97891	rno_retrom05148	NA	NA	NA
NA	NA	NA	NA	NA	mus_retrom49442	rnoiretrop42695	NA	NA	NA
NA	NA	NA	NA	NA	mus_retrop44371	rnoiretrop51898	NA	NA	NA
NA	NA	NA	NA	NA	mus_retrom70053	rnoiretrom23402	NA	NA	NA
NA	NA	NA	NA	NA	mus_retrop54426	rnoiretrop27666	NA	NA	NA
NA	NA	NA	NA	NA	mus_retrop79653	rnoiretrop42067	NA	NA	NA
NA	NA	NA	NA	NA	mus_retrom69830	rnoiretrop23726	NA	NA	NA
NA	NA	NA	NA	NA	mus_retrom105261	rnoiretrop28395	NA	NA	NA
NA	NA	NA	NA	NA	mus_retrop56772	rno_retrop01833	NA	NA	NA
NA	NA	NA	NA	NA	mus_retrop92578	rno_retrom02344	NA	NA	NA
NA	NA	NA	NA	NA	mus_retrop102165	rno_retrom04199	NA	NA	NA
NA	NA	NA	NA	NA	mus_retrom123929	rno_retrom02563	NA	NA	NA
NA	NA	NA	NA	NA	mus_retrom80325	rno_retrom06067	NA	NA	NA
NA	NA	NA	NA	NA	mus_retrom69903	rno_retrom03259	NA	NA	NA
NA	NA	NA	NA	NA	mus_retrom61496	rnoiretrom13712	NA	NA	NA
NA	NA	NA	NA	NA	musiretrop35082	rnoiretrom30487	NA	NA	NA
NA	NA	NA	NA	NA	mus_retrom73056	rnoiretrom03218	NA	NA	NA
NA	NA	NA	NA	NA	mus_retrom73059	rno_retrom00508	NA	NA	NA
NA	NA	NA	NA	NA	mus_retrom42691	rno_retrom03205	NA	NA	NA

## Sheet: Intact families (marsupials)
# Supplemental Table S6: intact marsupials orthologous retrocopy families
opossum	tasmanian_devil	wallaby
mdo_retrop30082	shairetrop08648	meuiretrom15022
mdoiretrom28508	sha_retrom02922	meu_retrop01937
mdo_retrom29312	sha_retrom04698	meuiretrom14769
mdo_retrop12248	sha_retrop02406	meuiretrop13965
mdo_retrop06490	sha_retrop02875	meu_retrop03431
mdo_retrop16465	shairetrop09252	meuiretrom04643
mdoiretrom13192	shairetrom02660	meuiretrop14462
mdo_retrop08318	sha_retrop02538	meuiretrom14806
mdo_retrom09037	sha_retrop04103	meuiretrom13197
mdo_retrop17962	sha_retrom02801	meuiretrop11442
mdoiretrom16569	shairetrom01760	meuiretrom07775
mdoiretrop29815	sha_retrop04906	meu_retrom01113
mdo_retrom12143	sha_retrop04206	meuiretrop04876
mdoiretrom13616	sha_retrom04472	meuiretrom08871
mdo_retrom05444	sha_retrom04642	meuiretrop03602
mdo_retrom05402	sha_retrom01177	meu_retrom03146
mdo_retrop25519	sha_retrop01404	meuiretrom11318
mdo_retrom08781	shairetrom06395	meuiretrop05071
mdo_retrop14478	sha_retrom01349	meuiretrom08980
mdo_retrop12835	sha_retrop04826	meuiretrop04145
mdo_retrom07982	sha_retrom02276	meu_retrom00727
mdo_retrop11440	sha_retrop02699	meuiretrom10326
mdo_retrop00882	shairetrom01244	meuiretrop09980
mdo_retrop26985	sha_retrop04380	meuiretrop14115
mdo_retrop00450	sha_retrop04769	meuiretrom10330
mdo_retrom00473	shairetrom05667	meu_retrom02430
mdo_retrop08836	sha_retrop04760	meu_retrom02140
mdo_retrom25495	sha_retrom03904	meu_retrom00585
mdo_retrop00546	shairetrop04459	meu_retrom03334
mdo_retrop03297	sha_retrom03989	meu_retrop00275
mdo_retrop00572	sha_retrop02641	meu_retrop00883
mdo_retrom00399	sha_retrom04577	meuiretrom08797
mdo_retrom26963	sha_retrom02602	meu_retrom00375
mdo_retrop29131	sha_retrop03394	meu_retrom00498
mdo_retrom05215	sha_retrom05030	meu_retrop00168
mdoiretrop15857	sha_retrop04153	meuiretrom07824
mdo_retrom21173	sha_retrom01550	meu_retrop02975
mdo_retrom00391	sha_retrom04576	meuiretrom08343
mdoiretrop15978	sha_retrop05081	meuiretrom06455
mdo_retrop31059	sha_retrop04866	meu_retrom00404
mdo_retrop17921	shairetrom06503	meuiretrop02111
mdo_retrom08205	shairetrom04306	meuiretrop09407
mdoiretrom29350	sha_retrom04943	meu_retrop01966
mdo_retrom25843	sha_retrom00789	meu_retrom02793
mdo_retrop00347	shairetrop07107	meu_retrop01802
mdo_retrom00202	shairetrop01698	meu_retrop01698
mdo_retrop16555	sha_retrop04819	meu_retrop01934
mdo_retrop11845	sha_retrop05130	meu_retrop02561
mdo_retrop15690	sha_retrom01584	meuiretrop06645
mdoiretrop06131	shairetrom01696	meuiretrom04130
mdo_retrom00341	sha_retrom02902	meuiretrop05093
mdoiretrop26432	shairetrop10214	meuiretrop04772
