# Supplementary material for: The life history of retrocopies illuminates the evolution of new mammalian genes
Source: HighWire-hosted journal article supplement (doi:10.1101/gr.198473.115), 2016-01-04
Supplement: Supplemental_Tables.zip [file Supplemental_Table_S7.xlsx]

## Sheet: Human
# Supplemental Table S7: human retrogenes
# The age of retrogenes not clustered in retrocopy families was set to "not clustered or species-specific"
retro_ID	age
hsa_retrom34511	not clustered or species-specific
hsa_retrom28577	not clustered or species-specific
hsa_retrom08497	primates-specific
hsa_retrop43557	eutherian-specific
hsa_retrom01128	not clustered or species-specific
hsa_retrop42534	not clustered or species-specific
hsa_retrop38678	not clustered or species-specific
hsa_retrop04800	not clustered or species-specific
hsa_retrop21604	vertebrates-specific
hsa_retrom42081	vertebrates-specific
hsa_retrop39197	primates-specific
hsa_retrop11144	primates-specific
hsa_retrom42405	not clustered or species-specific
hsa_retrom42416	primates-specific
hsa_retrop06597	eutherian-specific
hsa_retrop16929	eutherian-specific
hsa_retrom04584	primates-specific
hsa_retrom29895	eutherian-specific
hsa_retrop16723	primates-specific
hsairetrom03253	not clustered or species-specific
hsa_retrom30127	not clustered or species-specific
hsa_retrop08870	eutherian-specific
hsa_retrom16561	not clustered or species-specific
hsa_retrom40893	not clustered or species-specific
hsa_retrop43423	eutherian-specific
hsa_retrom11599	not clustered or species-specific
hsa_retrop33257	not clustered or species-specific
hsa_retrop31918	not clustered or species-specific
hsa_retrom31563	primates-specific
hsa_retrom41399	not clustered or species-specific
hsa_retrom31273	therian-specific
hsa_retrom28645	mammals-specific
hsa_retrop23701	not clustered or species-specific
hsa_retrom35513	eutherian-specific
hsa_retrop41621	not clustered or species-specific
hsairetrop23312	not clustered or species-specific
hsa_retrop34887	primates-specific
hsa_retrop25796	mammals-specific
hsa_retrop12921	not clustered or species-specific
hsairetrom27068	vertebrates-specific
hsa_retrop24944	not clustered or species-specific
hsa_retrom32073	eutherian-specific
hsa_retrop03984	not clustered or species-specific
hsairetrop02210	not clustered or species-specific
hsa_retrop16950	eutherian-specific
hsa_retrop45031	not clustered or species-specific
hsa_retrop24937	primates-specific
hsa_retrop43983	not clustered or species-specific
hsa_retrop43981	not clustered or species-specific
hsa_retrom22400	not clustered or species-specific
hsa_retrom15096	primates-specific
hsa_retrom01027	not clustered or species-specific
hsa_retrop43672	not clustered or species-specific
hsa_retrom36634	not clustered or species-specific
hsa_retrop38346	not clustered or species-specific
hsa_retrom40848	eutherian-specific
hsa_retrop38741	vertebrates-specific
hsa_retrom38240	primates-specific
hsa_retrop28075	not clustered or species-specific
hsa_retrop43276	primates-specific
hsairetrop03487	vertebrates-specific
hsairetrop10644	eutherian-specific
hsa_retrom32146	vertebrates-specific
hsa_retrom32068	eutherian-specific
hsa_retrop16833	eutherian-specific
hsairetrom39463	eutherian-specific
hsa_retrom05414	not clustered or species-specific
hsa_retrom35833	not clustered or species-specific
hsa_retrom34525	eutherian-specific
hsa_retrom14708	eutherian-specific
hsa_retrop12685	not clustered or species-specific
hsa_retrop42756	not clustered or species-specific
hsa_retrom06188	not clustered or species-specific
hsa_retrom40913	not clustered or species-specific
hsa_retrom04289	eutherian-specific
hsa_retrom24818	not clustered or species-specific
hsa_retrom11235	eutherian-specific
hsa_retrom29909	eutherian-specific
hsa_retrom30469	eutherian-specific
hsa_retrom30504	primates-specific
hsa_retrom24471	eutherian-specific
hsa_retrop00372	therian-specific
hsa_retrom41695	primates-specific
hsa_retrom39881	not clustered or species-specific
hsairetrom19599	not clustered or species-specific
hsa_retrom11253	not clustered or species-specific
hsa_retrom05384	primates-specific
hsa_retrop25540	vertebrates-specific
hsa_retrop42840	primates-specific
hsa_retrom40747	primates-specific
hsa_retrop41129	not clustered or species-specific
hsa_retrom01308	not clustered or species-specific
hsa_retrom17205	not clustered or species-specific
hsa_retrom03629	eutherian-specific
hsa_retrop11679	not clustered or species-specific
hsa_retrom09522	not clustered or species-specific
hsa_retrop10688	eutherian-specific
hsa_retrom26243	primates-specific
hsa_retrop37034	primates-specific
hsa_retrom36198	vertebrates-specific
hsa_retrop43881	primates-specific
hsa_retrom29080	not clustered or species-specific
hsa_retrop33264	eutherian-specific
hsairetrop39424	not clustered or species-specific
hsa_retrop29224	not clustered or species-specific
hsairetrop24499	eutherian-specific
hsairetrop28971	not clustered or species-specific
hsa_retrop13786	primates-specific
hsa_retrom41451	eutherian-specific
hsa_retrom40066	not clustered or species-specific
hsa_retrom35644	eutherian-specific
hsairetrom11641	therian-specific
hsa_retrom40349	eutherian-specific
hsa_retrop25534	eutherian-specific
hsa_retrop21972	not clustered or species-specific
hsa_retrop43189	eutherian-specific
hsa_retrom01098	not clustered or species-specific
hsa_retrop42618	primates-specific
hsa_retrop03388	not clustered or species-specific
hsa_retrom00812	not clustered or species-specific
hsa_retrom43342	not clustered or species-specific
hsa_retrop25503	eutherian-specific
hsa_retrop31666	eutherian-specific
hsa_retrop41383	not clustered or species-specific
hsa_retrom27453	primates-specific
hsa_retrom27210	eutherian-specific
hsa_retrop40951	therian-specific
hsairetrom21302	not clustered or species-specific
hsa_retrop06729	not clustered or species-specific
hsa_retrop34844	not clustered or species-specific
hsa_retrop16508	vertebrates-specific
hsa_retrop09820	primates-specific
hsa_retrom04009	not clustered or species-specific
hsa_retrom16945	primates-specific
hsa_retrop24872	not clustered or species-specific
hsairetrop15954	not clustered or species-specific
hsa_retrom32037	not clustered or species-specific
hsa_retrom00154	primates-specific
hsa_retrop25919	mammals-specific
hsa_retrop24009	vertebrates-specific
hsa_retrop12535	not clustered or species-specific
hsa_retrop44317	not clustered or species-specific
hsa_retrom38571	not clustered or species-specific
hsa_retrop04903	not clustered or species-specific
hsa_retrop42608	primates-specific
hsairetrop40022	eutherian-specific
hsa_retrop00375	primates-specific
hsa_retrop44318	eutherian-specific
hsairetrom30555	primates-specific
hsa_retrom20014	primates-specific
hsa_retrop11198	not clustered or species-specific
hsairetrop21077	vertebrates-specific
hsa_retrop34597	eutherian-specific
hsa_retrop13389	eutherian-specific
hsa_retrom14423	primates-specific
hsa_retrop39665	not clustered or species-specific
hsa_retrom15613	vertebrates-specific
hsa_retrop40672	eutherian-specific
hsa_retrop12913	not clustered or species-specific
hsairetrop21141	not clustered or species-specific
hsa_retrom26906	not clustered or species-specific
hsairetrom18830	not clustered or species-specific
hsa_retrom05363	therian-specific
hsa_retrop24514	not clustered or species-specific
hsairetrop37208	eutherian-specific
hsa_retrop44095	not clustered or species-specific
hsa_retrom04390	not clustered or species-specific
hsa_retrom40846	primates-specific
hsa_retrom39281	eutherian-specific
hsa_retrom28602	eutherian-specific
hsa_retrom30145	eutherian-specific
hsa_retrom31396	eutherian-specific
hsa_retrop27767	vertebrates-specific
hsa_retrom39356	not clustered or species-specific
hsa_retrom36664	not clustered or species-specific
hsa_retrop43829	eutherian-specific
hsa_retrop16464	not clustered or species-specific
hsa_retrop31280	primates-specific
hsa_retrom22262	eutherian-specific
hsa_retrop21106	primates-specific
hsa_retrop44920	not clustered or species-specific
hsa_retrop25974	not clustered or species-specific
hsa_retrop04204	not clustered or species-specific
hsa_retrom32294	primates-specific
hsa_retrom10183	not clustered or species-specific
hsa_retrom04212	not clustered or species-specific
hsa_retrom38978	eutherian-specific
hsa_retrop11436	primates-specific
hsa_retrom14617	not clustered or species-specific
hsa_retrop12392	not clustered or species-specific
hsa_retrop15181	vertebrates-specific
hsa_retrom08956	not clustered or species-specific
hsa_retrom14185	vertebrates-specific
hsairetrom10459	not clustered or species-specific
hsa_retrop14076	not clustered or species-specific
hsa_retrom37791	not clustered or species-specific
hsa_retrop41275	eutherian-specific
hsa_retrop32622	primates-specific
hsa_retrop37919	primates-specific

## Sheet: Chimpanzee
# Supplemental Table S7: chimpanzee retrogenes
# The age of retrogenes not clustered in retrocopy families was set to "not clustered or species-specific"
retro_ID	age
ptr_retrop07284	primates-specific
ptr_retrom05134	not clustered or species-specific
ptr_retrom06821	primates-specific
ptr_retrom09303	not clustered or species-specific
ptr_retrop07697	not clustered or species-specific
ptr_retrom06812	not clustered or species-specific
ptriretrom08541	not clustered or species-specific
ptriretrom39341	not clustered or species-specific
ptr_retrom06956	primates-specific
ptriretrop30572	not clustered or species-specific
ptr_retrom09260	not clustered or species-specific
ptr_retrom09263	eutherian-specific
ptriretrop13224	not clustered or species-specific
ptr_retrop02701	not clustered or species-specific
ptr_retrom08654	not clustered or species-specific
ptr_retrom09818	not clustered or species-specific
ptriretrom29203	primates-specific
ptr_retrom02757	eutherian-specific
ptr_retrop06968	eutherian-specific
ptr_retrop04066	primates-specific
ptriretrom06037	primates-specific
ptr_retrop05889	not clustered or species-specific
ptr_retrop02910	not clustered or species-specific
ptr_retrom10090	not clustered or species-specific
ptr_retrop09476	not clustered or species-specific
ptr_retrop06003	not clustered or species-specific
ptr_retrom06105	eutherian-specific
ptr_retrom04336	not clustered or species-specific
ptriretrom09033	not clustered or species-specific
ptr_retrop08827	not clustered or species-specific
ptr_retrom03743	therian-specific
ptr_retrom08390	eutherian-specific
ptr_retrop08820	not clustered or species-specific
ptr_retrop08766	therian-specific
ptr_retrop04081	not clustered or species-specific
ptr_retrop11620	not clustered or species-specific
ptriretrom09365	not clustered or species-specific
ptr_retrop04089	not clustered or species-specific
ptr_retrop05465	not clustered or species-specific
ptriretrom07930	primates-specific
ptriretrom14283	not clustered or species-specific
ptr_retrom07329	eutherian-specific
ptr_retrom06947	not clustered or species-specific
ptr_retrop01667	not clustered or species-specific
ptr_retrom07047	eutherian-specific
ptr_retrom09007	vertebrates-specific
ptr_retrop09480	eutherian-specific
ptriretrom15908	not clustered or species-specific
ptriretrop34565	eutherian-specific
ptr_retrom10118	not clustered or species-specific
ptriretrom33178	not clustered or species-specific
ptriretrop05594	eutherian-specific
ptr_retrom04521	therian-specific
ptr_retrom03524	not clustered or species-specific
ptriretrom22766	eutherian-specific
ptriretrop12804	not clustered or species-specific
ptr_retrom08615	not clustered or species-specific
ptr_retrop06858	primates-specific
ptr_retrop05221	not clustered or species-specific
ptr_retrom05948	primates-specific
ptriretrom18906	primates-specific
ptr_retrom08836	not clustered or species-specific
ptriretrom32778	not clustered or species-specific
ptr_retrom09324	not clustered or species-specific
ptr_retrop06053	not clustered or species-specific
ptriretrom13697	not clustered or species-specific
ptr_retrop07439	not clustered or species-specific
ptr_retrop05720	eutherian-specific
ptr_retrop05946	therian-specific
ptr_retrop07435	not clustered or species-specific
ptr_retrom09036	primates-specific
ptr_retrop02029	eutherian-specific
ptr_retrop03246	primates-specific
ptr_retrop04151	not clustered or species-specific
ptr_retrop04015	not clustered or species-specific
ptriretrop35830	not clustered or species-specific
ptr_retrop03157	eutherian-specific
ptriretrom15367	not clustered or species-specific
ptriretrom10087	primates-specific
ptr_retrop06510	not clustered or species-specific
ptr_retrop06911	eutherian-specific
ptr_retrom07033	not clustered or species-specific
ptr_retrom09926	primates-specific
ptriretrom36440	mammals-specific
ptr_retrom05994	not clustered or species-specific
ptr_retrop06846	not clustered or species-specific
ptr_retrom09936	not clustered or species-specific
ptr_retrom05512	not clustered or species-specific
ptr_retrop10322	therian-specific
ptr_retrom05511	eutherian-specific
ptr_retrom11043	not clustered or species-specific
ptr_retrop05549	not clustered or species-specific
ptr_retrop05238	not clustered or species-specific
ptriretrom12454	not clustered or species-specific
ptriretrom22093	eutherian-specific
ptr_retrop05753	not clustered or species-specific
ptr_retrom06844	not clustered or species-specific
ptr_retrop05057	eutherian-specific
ptr_retrop11569	not clustered or species-specific
ptr_retrom06968	not clustered or species-specific
ptr_retrop09665	vertebrates-specific
ptr_retrop04182	not clustered or species-specific
ptr_retrom06895	not clustered or species-specific
ptriretrop24479	eutherian-specific
ptr_retrop06726	not clustered or species-specific
ptr_retrop03064	vertebrates-specific
ptriretrom18724	not clustered or species-specific
ptr_retrop06728	primates-specific
ptriretrom14062	eutherian-specific
ptr_retrom06090	not clustered or species-specific
ptr_retrop09625	eutherian-specific
ptr_retrop10324	primates-specific
ptr_retrom08991	eutherian-specific
ptr_retrom07221	not clustered or species-specific
ptr_retrop06937	not clustered or species-specific
ptr_retrop08874	not clustered or species-specific
ptr_retrop08877	eutherian-specific
ptr_retrop07621	primates-specific
ptriretrom34871	eutherian-specific
ptr_retrop08718	primates-specific
ptriretrom11532	not clustered or species-specific
ptr_retrop06838	not clustered or species-specific
ptr_retrom11213	not clustered or species-specific
ptr_retrop02341	not clustered or species-specific
ptr_retrom02589	primates-specific
ptriretrop16360	eutherian-specific
ptr_retrop02476	primates-specific
ptriretrop41129	not clustered or species-specific
ptr_retrom08879	primates-specific
ptr_retrop06730	primates-specific
ptr_retrom02159	not clustered or species-specific
ptr_retrom03781	not clustered or species-specific
ptr_retrop02897	primates-specific
ptr_retrom10110	not clustered or species-specific
ptriretrop04275	mammals-specific
ptriretrop05662	vertebrates-specific
ptr_retrom07154	vertebrates-specific
ptriretrom32891	eutherian-specific
ptriretrop15155	eutherian-specific
ptriretrom28230	not clustered or species-specific
ptr_retrop03702	not clustered or species-specific
ptriretrop22204	eutherian-specific
ptriretrom11693	not clustered or species-specific
ptr_retrom09623	not clustered or species-specific
ptr_retrom10757	eutherian-specific
ptriretrom23648	not clustered or species-specific
ptriretrom10856	not clustered or species-specific
ptr_retrom03545	eutherian-specific
ptr_retrom03803	not clustered or species-specific
ptr_retrom06416	not clustered or species-specific
ptr_retrop06940	not clustered or species-specific
ptr_retrop07460	vertebrates-specific
ptr_retrop07397	not clustered or species-specific
ptr_retrom04393	not clustered or species-specific
ptriretrop25305	eutherian-specific
ptriretrop41627	vertebrates-specific
ptriretrop24608	not clustered or species-specific
ptriretrom28227	not clustered or species-specific
ptr_retrop01621	not clustered or species-specific
ptriretrop21747	eutherian-specific
ptr_retrom07363	eutherian-specific
ptr_retrom08501	not clustered or species-specific
ptr_retrop04117	primates-specific
ptriretrom25424	not clustered or species-specific
ptr_retrom07455	not clustered or species-specific
ptr_retrop11536	primates-specific
ptriretrom10999	vertebrates-specific
ptriretrom12424	eutherian-specific
ptr_retrom11061	not clustered or species-specific
ptriretrom25110	not clustered or species-specific
ptr_retrop04216	not clustered or species-specific
ptr_retrop09685	eutherian-specific
ptriretrop25985	not clustered or species-specific
ptr_retrop01937	vertebrates-specific
ptr_retrom06934	primates-specific
ptr_retrom06937	eutherian-specific
ptr_retrop05901	not clustered or species-specific
ptr_retrom04388	not clustered or species-specific
ptr_retrop07664	primates-specific
ptr_retrom09829	not clustered or species-specific
ptr_retrom09446	primates-specific
ptr_retrop04568	not clustered or species-specific
ptr_retrop06552	not clustered or species-specific
ptr_retrop03674	not clustered or species-specific
ptr_retrop03681	not clustered or species-specific
ptr_retrom08738	not clustered or species-specific
ptr_retrom03320	vertebrates-specific
ptr_retrop09612	primates-specific
ptr_retrom07523	vertebrates-specific
ptr_retrom06024	vertebrates-specific
ptr_retrop03855	vertebrates-specific
ptriretrom34902	primates-specific
ptr_retrop03911	not clustered or species-specific
ptr_retrom11002	not clustered or species-specific
ptr_retrop07092	not clustered or species-specific
ptr_retrop06784	not clustered or species-specific
ptriretrom41440	not clustered or species-specific
ptriretrom41121	eutherian-specific
ptr_retrop10966	not clustered or species-specific
ptriretrop04360	not clustered or species-specific
ptr_retrop08743	eutherian-specific
ptriretrom05050	eutherian-specific
ptriretrop04910	eutherian-specific
ptr_retrop02111	mammals-specific
ptriretrop11244	not clustered or species-specific
ptr_retrop09857	not clustered or species-specific
ptriretrop05953	not clustered or species-specific
ptr_retrop07077	not clustered or species-specific
ptriretrop14867	vertebrates-specific
ptriretrom26301	not clustered or species-specific
ptriretrop31265	primates-specific
ptr_retrom03451	primates-specific
ptriretrom40523	not clustered or species-specific
ptr_retrom09675	eutherian-specific
ptriretrom25790	primates-specific
ptriretrom38759	not clustered or species-specific
ptriretrom07749	eutherian-specific
ptr_retrom07236	primates-specific
ptr_retrop04000	vertebrates-specific
ptr_retrom02738	eutherian-specific
ptr_retrom05397	primates-specific
ptr_retrom04300	not clustered or species-specific
ptriretrom41337	not clustered or species-specific
ptr_retrop07143	eutherian-specific

## Sheet: Gorilla
# Supplemental Table S7: gorilla retrogenes
# The age of retrogenes not clustered in retrocopy families was set to "not clustered or species-specific"
retro_ID	age
ggoiretrom22600	primates-specific
ggo_retrop01891	not clustered or species-specific
ggo_retrop00765	primates-specific
ggo_retrop00425	eutherian-specific
ggo_retrop02766	primates-specific
ggo_retrop03074	primates-specific
ggo_retrop01141	not clustered or species-specific
ggo_retrop01478	therian-specific
ggo_retrop03769	not clustered or species-specific
ggo_retrop00487	eutherian-specific
ggo_retrom04828	eutherian-specific
ggo_retrop01273	vertebrates-specific
ggo_retrop03481	eutherian-specific
ggo_retrom00137	eutherian-specific
ggoiretrom16255	not clustered or species-specific
ggo_retrom03090	primates-specific
ggo_retrop02472	not clustered or species-specific
ggo_retrom00801	primates-specific
ggoiretrom27671	vertebrates-specific
ggo_retrom02024	not clustered or species-specific
ggo_retrop02001	not clustered or species-specific
ggo_retrom04528	not clustered or species-specific
ggo_retrop01374	not clustered or species-specific
ggoiretrom27069	not clustered or species-specific
ggo_retrom01644	not clustered or species-specific
ggo_retrop04636	not clustered or species-specific
ggo_retrom01402	eutherian-specific
ggoiretrop22755	primates-specific
ggo_retrom01767	not clustered or species-specific
ggo_retrop00013	not clustered or species-specific
ggoiretrom10965	not clustered or species-specific
ggoiretrom24382	not clustered or species-specific
ggo_retrop00496	eutherian-specific
ggoiretrop20035	eutherian-specific
ggoiretrop22294	not clustered or species-specific
ggo_retrop00711	not clustered or species-specific
ggo_retrop00498	eutherian-specific
ggoiretrom06401	not clustered or species-specific
ggo_retrom02909	eutherian-specific
ggo_retrom02908	primates-specific
ggo_retrom03268	vertebrates-specific
ggo_retrom04049	not clustered or species-specific
ggoiretrom18593	not clustered or species-specific
ggo_retrom02661	primates-specific
ggo_retrop02876	eutherian-specific
ggo_retrop00417	eutherian-specific
ggoiretrom27377	not clustered or species-specific
ggo_retrom04277	eutherian-specific
ggoiretrop22208	not clustered or species-specific
ggo_retrop00483	mammals-specific
ggo_retrop03677	not clustered or species-specific
ggoiretrom09776	not clustered or species-specific
ggoiretrom11488	eutherian-specific
ggo_retrop00922	not clustered or species-specific
ggo_retrom01567	not clustered or species-specific
ggoiretrom32793	eutherian-specific
ggoiretrom14778	not clustered or species-specific
ggo_retrop02893	not clustered or species-specific
ggoiretrom14291	vertebrates-specific
ggo_retrom04229	vertebrates-specific
ggo_retrom02916	not clustered or species-specific
ggo_retrom01581	eutherian-specific
ggo_retrom03400	primates-specific
ggoiretrom35112	not clustered or species-specific
ggo_retrom04429	primates-specific
ggo_retrop04681	not clustered or species-specific
ggo_retrom02753	not clustered or species-specific
ggoiretrop16938	not clustered or species-specific
ggo_retrom02919	primates-specific
ggo_retrop01552	not clustered or species-specific
ggo_retrom00969	not clustered or species-specific
ggoiretrop10160	vertebrates-specific
ggo_retrop00629	vertebrates-specific
ggoiretrom22658	vertebrates-specific
ggo_retrom04075	mammals-specific
ggo_retrom01554	eutherian-specific
ggo_retrop04303	eutherian-specific
ggoiretrom33742	not clustered or species-specific
ggoiretrom23748	eutherian-specific
ggo_retrop04804	vertebrates-specific
ggo_retrop01096	eutherian-specific
ggoiretrom22547	eutherian-specific
ggoiretrop19615	not clustered or species-specific
ggo_retrop00034	mammals-specific
ggoiretrom22540	primates-specific
ggo_retrom02686	not clustered or species-specific
ggoiretrom17077	primates-specific
ggo_retrop04125	not clustered or species-specific
ggo_retrom04149	not clustered or species-specific
ggo_retrom01190	primates-specific
ggo_retrop04454	primates-specific
ggoiretrop25397	primates-specific
ggo_retrom01274	not clustered or species-specific
ggoiretrop09639	eutherian-specific
ggo_retrom00991	not clustered or species-specific
ggo_retrop01527	not clustered or species-specific
ggo_retrom02121	primates-specific
ggo_retrop01722	primates-specific
ggo_retrom04068	eutherian-specific
ggo_retrop02859	not clustered or species-specific
ggoiretrop30501	not clustered or species-specific
ggo_retrom03958	primates-specific
ggoiretrom13206	not clustered or species-specific
ggoiretrop00347	not clustered or species-specific
ggo_retrop01181	not clustered or species-specific
ggo_retrop02725	primates-specific
ggoiretrop31357	not clustered or species-specific
ggo_retrop01319	not clustered or species-specific
ggo_retrom02915	not clustered or species-specific
ggo_retrop01235	not clustered or species-specific
ggo_retrop03636	primates-specific
ggoiretrom26992	primates-specific
ggo_retrom04159	not clustered or species-specific
ggo_retrom04440	not clustered or species-specific
ggo_retrom03704	not clustered or species-specific
ggoiretrom10316	not clustered or species-specific
ggo_retrop02536	not clustered or species-specific
ggo_retrom04768	not clustered or species-specific
ggo_retrop00150	vertebrates-specific
ggo_retrop00444	not clustered or species-specific
ggo_retrom04369	primates-specific
ggo_retrop03201	vertebrates-specific
ggoiretrom34757	not clustered or species-specific
ggo_retrom01334	not clustered or species-specific
ggo_retrop01631	not clustered or species-specific
ggo_retrop03207	primates-specific
ggo_retrom01089	not clustered or species-specific
ggo_retrop03756	not clustered or species-specific
ggo_retrom03437	vertebrates-specific
ggo_retrop03593	eutherian-specific
ggo_retrom04563	not clustered or species-specific
ggo_retrop04824	not clustered or species-specific
ggoiretrop23541	not clustered or species-specific
ggo_retrop03626	not clustered or species-specific
ggoiretrop06702	not clustered or species-specific
ggo_retrop02089	eutherian-specific
ggo_retrop03848	primates-specific
ggo_retrop01632	not clustered or species-specific
ggo_retrop03146	not clustered or species-specific
ggo_retrom00307	primates-specific
ggo_retrop01456	not clustered or species-specific
ggoiretrom36285	not clustered or species-specific
ggo_retrom03587	eutherian-specific
ggo_retrop01110	therian-specific
ggo_retrom03758	not clustered or species-specific
ggo_retrop01506	eutherian-specific
ggo_retrom03588	eutherian-specific
ggoiretrop14679	eutherian-specific
ggo_retrom03775	eutherian-specific
ggoiretrop12716	not clustered or species-specific
ggo_retrom04276	eutherian-specific
ggo_retrop02834	eutherian-specific
ggo_retrop00378	primates-specific
ggo_retrop01627	not clustered or species-specific
ggoiretrop26416	not clustered or species-specific
ggoiretrop25743	not clustered or species-specific
ggoiretrom19370	not clustered or species-specific
ggoiretrom04923	primates-specific
ggo_retrop04453	therian-specific
ggo_retrop00676	not clustered or species-specific
ggo_retrop02312	eutherian-specific
ggo_retrop01212	primates-specific
ggoiretrop06634	not clustered or species-specific
ggoiretrop02983	vertebrates-specific
ggoiretrom25624	not clustered or species-specific
ggo_retrom03138	eutherian-specific
ggo_retrop02920	not clustered or species-specific
ggo_retrom02957	not clustered or species-specific
ggo_retrop01355	not clustered or species-specific
ggo_retrom01755	not clustered or species-specific
ggoiretrop05669	not clustered or species-specific
ggo_retrop00464	not clustered or species-specific
ggoiretrom02775	primates-specific
ggo_retrop02800	eutherian-specific
ggo_retrom00862	eutherian-specific
ggoiretrop01003	eutherian-specific
ggo_retrom02714	not clustered or species-specific
ggo_retrom00861	not clustered or species-specific
ggo_retrop00694	eutherian-specific
ggo_retrom02891	primates-specific
ggoiretrop10752	not clustered or species-specific
ggo_retrop02751	not clustered or species-specific
ggo_retrop01847	primates-specific
ggo_retrop02719	not clustered or species-specific
ggo_retrom03687	primates-specific
ggo_retrom02120	therian-specific
ggo_retrom02913	not clustered or species-specific
ggo_retrop00958	not clustered or species-specific
ggo_retrom00696	primates-specific
ggo_retrom00027	not clustered or species-specific
ggo_retrop01440	eutherian-specific
ggo_retrop02952	eutherian-specific
ggo_retrop01171	primates-specific
ggoiretrom22062	not clustered or species-specific
ggo_retrop01362	vertebrates-specific
ggo_retrom01743	eutherian-specific
ggoiretrop21533	not clustered or species-specific
ggo_retrop02817	eutherian-specific
ggo_retrop02783	not clustered or species-specific
ggo_retrom00922	eutherian-specific
ggo_retrom02760	eutherian-specific
ggo_retrop02787	eutherian-specific
ggoiretrom04467	vertebrates-specific
ggoiretrom05197	not clustered or species-specific
ggoiretrop23007	primates-specific
ggo_retrom00756	vertebrates-specific
ggo_retrom03618	not clustered or species-specific
ggo_retrom00753	not clustered or species-specific
ggoiretrom06179	not clustered or species-specific
ggo_retrop02547	not clustered or species-specific
ggoiretrom10045	not clustered or species-specific
ggo_retrom02038	not clustered or species-specific
ggo_retrop04224	primates-specific
ggo_retrop03336	not clustered or species-specific
ggo_retrop02256	not clustered or species-specific

## Sheet: Orangutan
# Supplemental Table S7: orangutan retrogenes
# The age of retrogenes not clustered in retrocopy families was set to "not clustered or species-specific"
retro_ID	age
ppy_retrom15891	vertebrates-specific
ppyiretrom28681	eutherian-specific
ppy_retrop03024	vertebrates-specific
ppy_retrom12842	primates-specific
ppy_retrop10117	therian-specific
ppyiretrom14451	therian-specific
ppy_retrop06646	vertebrates-specific
ppy_retrop09164	primates-specific
ppy_retrom15952	primates-specific
ppy_retrom16166	eutherian-specific
ppy_retrop14239	vertebrates-specific
ppyiretrop37217	not clustered or species-specific
ppy_retrom02856	eutherian-specific
ppy_retrom09831	not clustered or species-specific
ppy_retrop00341	not clustered or species-specific
ppy_retrop10878	not clustered or species-specific
ppyiretrop34054	not clustered or species-specific
ppyiretrop15865	not clustered or species-specific
ppyiretrop43282	not clustered or species-specific
ppy_retrom12113	vertebrates-specific
ppyiretrop22566	primates-specific
ppy_retrom12756	primates-specific
ppyiretrop02386	not clustered or species-specific
ppy_retrop13587	eutherian-specific
ppyiretrop35795	not clustered or species-specific
ppy_retrom05643	not clustered or species-specific
ppyiretrom28348	primates-specific
ppy_retrop13837	not clustered or species-specific
ppy_retrop13834	not clustered or species-specific
ppyiretrom30618	not clustered or species-specific
ppy_retrop12988	not clustered or species-specific
ppyiretrop17378	eutherian-specific
ppyiretrom11959	vertebrates-specific
ppyiretrom11492	primates-specific
ppyiretrop06067	not clustered or species-specific
ppy_retrom07635	not clustered or species-specific
ppy_retrop19460	primates-specific
ppy_retrop14308	primates-specific
ppyiretrom26748	primates-specific
ppyiretrop37262	primates-specific
ppy_retrop13435	primates-specific
ppy_retrom12341	not clustered or species-specific
ppyiretrop40787	not clustered or species-specific
ppy_retrom16162	eutherian-specific
ppy_retrop06394	primates-specific
ppy_retrop12937	not clustered or species-specific
ppy_retrom11367	not clustered or species-specific
ppy_retrop10463	not clustered or species-specific
ppy_retrom10262	primates-specific
ppy_retrom07405	not clustered or species-specific
ppyiretrop42021	not clustered or species-specific
ppy_retrom13840	not clustered or species-specific
ppy_retrop12234	primates-specific
ppy_retrom17794	not clustered or species-specific
ppyiretrom07059	primates-specific
ppy_retrop15249	not clustered or species-specific
ppyiretrom28027	primates-specific
ppy_retrom15664	primates-specific
ppy_retrop07990	not clustered or species-specific
ppyiretrop38637	eutherian-specific
ppy_retrop19120	not clustered or species-specific
ppy_retrop18366	eutherian-specific
ppyiretrom10081	not clustered or species-specific
ppy_retrop12634	not clustered or species-specific
ppy_retrom13206	vertebrates-specific
ppy_retrop14017	eutherian-specific
ppy_retrop07868	not clustered or species-specific
ppy_retrop10253	eutherian-specific
ppyiretrop31583	primates-specific
ppy_retrom08618	not clustered or species-specific
ppy_retrom00908	not clustered or species-specific
ppyiretrop40922	not clustered or species-specific
ppyiretrom33519	not clustered or species-specific
ppy_retrom07553	not clustered or species-specific
ppy_retrop11490	eutherian-specific
ppyiretrom11931	primates-specific
ppy_retrop10844	eutherian-specific
ppy_retrop13699	eutherian-specific
ppyiretrop01986	not clustered or species-specific
ppy_retrom07325	not clustered or species-specific
ppyiretrom27537	primates-specific
ppy_retrom18600	therian-specific
ppy_retrop17472	eutherian-specific
ppyiretrop15925	vertebrates-specific
ppyiretrop38578	mammals-specific
ppy_retrop13613	primates-specific
ppy_retrom16239	eutherian-specific
ppy_retrop13617	eutherian-specific
ppyiretrom34898	not clustered or species-specific
ppy_retrom15597	therian-specific
ppy_retrop16805	eutherian-specific
ppyiretrop02448	not clustered or species-specific
ppyiretrom36338	eutherian-specific
ppyiretrom23014	eutherian-specific
ppy_retrom11175	not clustered or species-specific
ppy_retrom17882	not clustered or species-specific
ppy_retrop17668	not clustered or species-specific
ppy_retrop02577	not clustered or species-specific
ppy_retrop19257	not clustered or species-specific
ppy_retrom16234	not clustered or species-specific
ppyiretrop08464	eutherian-specific
ppy_retrop14577	not clustered or species-specific
ppy_retrom09471	not clustered or species-specific
ppy_retrop11314	eutherian-specific
ppy_retrom13860	not clustered or species-specific
ppy_retrom15855	eutherian-specific
ppy_retrom15854	eutherian-specific
ppyiretrom24507	not clustered or species-specific
ppyiretrop29698	not clustered or species-specific
ppy_retrom16997	not clustered or species-specific
ppy_retrom07619	eutherian-specific
ppy_retrom06910	eutherian-specific
ppy_retrom08789	vertebrates-specific
ppyiretrop08662	vertebrates-specific
ppy_retrom12094	not clustered or species-specific
ppyiretrop26965	not clustered or species-specific
ppyiretrom09123	not clustered or species-specific
ppy_retrom13303	not clustered or species-specific
ppy_retrom08940	not clustered or species-specific
ppy_retrom07825	not clustered or species-specific
ppyiretrop18182	not clustered or species-specific
ppy_retrom13480	eutherian-specific
ppy_retrop03058	not clustered or species-specific
ppy_retrop16278	not clustered or species-specific
ppy_retrom17108	not clustered or species-specific
ppyiretrop15798	vertebrates-specific
ppy_retrop05125	eutherian-specific
ppy_retrom06920	eutherian-specific
ppy_retrop19173	not clustered or species-specific
ppyiretrom35392	vertebrates-specific
ppy_retrop10495	not clustered or species-specific
ppy_retrom15638	eutherian-specific
ppyiretrop29136	not clustered or species-specific
ppy_retrop19112	not clustered or species-specific
ppyiretrom31424	primates-specific
ppy_retrop10098	primates-specific
ppyiretrom12290	primates-specific
ppyiretrom12923	vertebrates-specific
ppyiretrom12294	not clustered or species-specific
ppy_retrom12298	not clustered or species-specific
ppy_retrom15061	eutherian-specific
ppy_retrop16572	primates-specific
ppy_retrom16325	primates-specific
ppyiretrom28090	eutherian-specific
ppy_retrom17567	not clustered or species-specific
ppy_retrop16092	not clustered or species-specific
ppy_retrom01828	not clustered or species-specific
ppyiretrop02486	not clustered or species-specific
ppyiretrop10566	not clustered or species-specific
ppyiretrom17224	not clustered or species-specific
ppy_retrop13310	not clustered or species-specific
ppy_retrop17988	not clustered or species-specific
ppyiretrop08929	not clustered or species-specific
ppy_retrop14458	eutherian-specific
ppyiretrop06131	not clustered or species-specific
ppy_retrom12541	not clustered or species-specific
ppyiretrop34239	primates-specific
ppy_retrop13315	primates-specific
ppyiretrom21702	not clustered or species-specific
ppy_retrop13897	not clustered or species-specific
ppy_retrom14081	not clustered or species-specific
ppy_retrop07948	not clustered or species-specific
ppy_retrop11575	not clustered or species-specific
ppyiretrop26220	eutherian-specific
ppyiretrop14723	not clustered or species-specific
ppyiretrop03274	not clustered or species-specific
ppy_retrom17624	vertebrates-specific
ppyiretrop16677	not clustered or species-specific
ppy_retrom12816	not clustered or species-specific
ppy_retrom09991	not clustered or species-specific
ppy_retrop14634	vertebrates-specific
ppy_retrom07525	not clustered or species-specific
ppy_retrop07256	primates-specific
ppy_retrop07091	eutherian-specific
ppy_retrop15211	primates-specific
ppy_retrop15191	not clustered or species-specific
ppyiretrom08379	primates-specific
ppyiretrom31564	not clustered or species-specific
ppy_retrom15949	not clustered or species-specific
ppy_retrop03208	not clustered or species-specific
ppyiretrop27845	eutherian-specific
ppyiretrop16855	eutherian-specific
ppyiretrom10562	vertebrates-specific
ppy_retrom11135	therian-specific
ppy_retrop13793	eutherian-specific
ppy_retrom06949	eutherian-specific
ppy_retrop13659	eutherian-specific
ppy_retrop13399	not clustered or species-specific
ppy_retrom12826	not clustered or species-specific
ppy_retrop10678	primates-specific
ppy_retrop19059	not clustered or species-specific
ppy_retrop04825	primates-specific
ppy_retrom10418	eutherian-specific
ppyiretrop02408	not clustered or species-specific

## Sheet: Macaque
# Supplemental Table S7: macaque retrogenes
# The age of retrogenes not clustered in retrocopy families was set to "not clustered or species-specific"
retro_ID	age
mmu_retrom16382	not clustered or species-specific
mmu_retrop40387	eutherian-specific
mmu_retrop23801	primates-specific
mmuiretrom29253	not clustered or species-specific
mmu_retrom05415	not clustered or species-specific
mmu_retrom14487	not clustered or species-specific
mmu_retrom36095	primates-specific
mmu_retrom22976	not clustered or species-specific
mmu_retrom23086	not clustered or species-specific
mmuiretrop39741	not clustered or species-specific
mmu_retrom13785	primates-specific
mmu_retrom08800	eutherian-specific
mmu_retrop15914	not clustered or species-specific
mmu_retrom36911	not clustered or species-specific
mmu_retrom28639	not clustered or species-specific
mmu_retrop09836	not clustered or species-specific
mmu_retrop37016	not clustered or species-specific
mmu_retrop10339	eutherian-specific
mmu_retrom22730	primates-specific
mmuiretrop25452	not clustered or species-specific
mmu_retrom33417	not clustered or species-specific
mmu_retrop17936	primates-specific
mmu_retrom34073	not clustered or species-specific
mmu_retrom30456	eutherian-specific
mmu_retrop09242	primates-specific
mmu_retrom31878	not clustered or species-specific
mmu_retrop24513	not clustered or species-specific
mmu_retrom26957	not clustered or species-specific
mmuiretrom32552	not clustered or species-specific
mmu_retrop13476	eutherian-specific
mmu_retrop24354	eutherian-specific
mmuiretrop19690	not clustered or species-specific
mmu_retrop18428	not clustered or species-specific
mmu_retrom22982	primates-specific
mmu_retrom31060	eutherian-specific
mmu_retrop36525	primates-specific
mmu_retrom32835	eutherian-specific
mmu_retrop23994	not clustered or species-specific
mmu_retrom31065	eutherian-specific
mmu_retrom07504	primates-specific
mmu_retrop32916	primates-specific
mmu_retrop38023	primates-specific
mmu_retrom30567	primates-specific
mmu_retrop24059	primates-specific
mmu_retrop32167	eutherian-specific
mmuiretrop06956	vertebrates-specific
mmu_retrom38977	vertebrates-specific
mmu_retrom26672	primates-specific
mmu_retrom34686	eutherian-specific
mmu_retrom11625	eutherian-specific
mmu_retrop27534	not clustered or species-specific
mmu_retrop37312	primates-specific
mmu_retrop33407	not clustered or species-specific
mmu_retrom38327	not clustered or species-specific
mmu_retrom23598	vertebrates-specific
mmu_retrop25194	eutherian-specific
mmu_retrop09478	primates-specific
mmu_retrom23856	not clustered or species-specific
mmu_retrop37688	primates-specific
mmu_retrop13686	eutherian-specific
mmuiretrom13524	primates-specific
mmu_retrom35574	not clustered or species-specific
mmu_retrom38195	not clustered or species-specific
mmu_retrom23904	primates-specific
mmuiretrom07436	primates-specific
mmuiretrop20722	vertebrates-specific
mmu_retrop09481	not clustered or species-specific
mmu_retrom20589	eutherian-specific
mmu_retrom34358	primates-specific
mmuiretrom06988	vertebrates-specific
mmu_retrom14788	eutherian-specific
mmu_retrom03346	not clustered or species-specific
mmu_retrop19567	not clustered or species-specific
mmu_retrop24263	eutherian-specific
mmu_retrom31540	not clustered or species-specific
mmu_retrop17269	not clustered or species-specific
mmu_retrop33230	eutherian-specific
mmu_retrop36393	vertebrates-specific
mmu_retrop24442	not clustered or species-specific
mmu_retrop06436	primates-specific
mmu_retrop15886	not clustered or species-specific
mmu_retrop28095	eutherian-specific
mmu_retrop33413	not clustered or species-specific
mmu_retrom07763	not clustered or species-specific
mmu_retrop37288	vertebrates-specific
mmu_retrom25789	not clustered or species-specific
mmu_retrop24072	eutherian-specific
mmu_retrop17063	primates-specific
mmu_retrop38007	therian-specific
mmu_retrom16700	vertebrates-specific
mmu_retrom29993	not clustered or species-specific
mmuiretrom22531	not clustered or species-specific
mmu_retrop11779	vertebrates-specific
mmu_retrop08768	vertebrates-specific
mmu_retrom26964	vertebrates-specific
mmu_retrop30866	not clustered or species-specific
mmuiretrom04906	primates-specific
mmu_retrom37868	not clustered or species-specific
mmu_retrop09346	not clustered or species-specific
mmu_retrom21300	primates-specific
mmu_retrop05999	not clustered or species-specific
mmu_retrop32951	eutherian-specific
mmu_retrop25541	primates-specific
mmu_retrop37430	not clustered or species-specific
mmu_retrop35124	not clustered or species-specific
mmu_retrop32955	eutherian-specific
mmu_retrom25906	eutherian-specific
mmu_retrom22830	not clustered or species-specific
mmuiretrom36589	not clustered or species-specific
mmuiretrop12468	eutherian-specific
mmu_retrop23739	not clustered or species-specific
mmu_retrom11374	therian-specific
mmu_retrom31333	primates-specific
mmu_retrom05409	eutherian-specific
mmu_retrop08283	primates-specific
mmu_retrom22578	primates-specific
mmu_retrop29461	not clustered or species-specific
mmu_retrop33300	not clustered or species-specific
mmu_retrom28576	eutherian-specific
mmu_retrom08768	not clustered or species-specific
mmu_retrom23178	not clustered or species-specific
mmu_retrom11809	not clustered or species-specific
mmu_retrop16057	eutherian-specific
mmu_retrom32458	primates-specific
mmu_retrop40102	not clustered or species-specific
mmuiretrom15445	not clustered or species-specific
mmu_retrom05283	not clustered or species-specific
mmu_retrom06966	not clustered or species-specific
mmuiretrop07301	not clustered or species-specific
mmu_retrom06090	not clustered or species-specific
mmu_retrom32264	not clustered or species-specific
mmu_retrom26708	not clustered or species-specific
mmu_retrop23548	not clustered or species-specific
mmu_retrom17528	eutherian-specific
mmu_retrop24621	eutherian-specific
mmu_retrop12623	primates-specific
mmu_retrop09860	primates-specific
mmu_retrom10527	not clustered or species-specific
mmuiretrop10926	not clustered or species-specific
mmu_retrom09603	eutherian-specific
mmu_retrom32216	eutherian-specific
mmu_retrom25709	not clustered or species-specific
mmu_retrom22588	eutherian-specific
mmuiretrom35853	not clustered or species-specific
mmu_retrop19119	vertebrates-specific
mmu_retrop23959	not clustered or species-specific
mmuiretrom34527	not clustered or species-specific
mmu_retrop24936	not clustered or species-specific
mmuiretrom08811	vertebrates-specific
mmu_retrom17808	not clustered or species-specific
mmu_retrom26921	not clustered or species-specific
mmu_retrop28449	primates-specific
mmu_retrop23557	primates-specific
mmu_retrop18596	mammals-specific
mmu_retrop24730	not clustered or species-specific
mmu_retrop23550	primates-specific
mmuiretrop31051	not clustered or species-specific
mmu_retrop29840	not clustered or species-specific
mmu_retrop36767	eutherian-specific
mmu_retrop15725	therian-specific
mmu_retrom05467	eutherian-specific
mmu_retrop13721	eutherian-specific
mmu_retrom06176	not clustered or species-specific
mmu_retrom23102	eutherian-specific
mmu_retrop39941	not clustered or species-specific
mmuiretrop20924	vertebrates-specific
mmu_retrom32204	not clustered or species-specific
mmu_retrom22451	primates-specific
mmuiretrom24514	primates-specific
mmu_retrop24411	not clustered or species-specific
mmu_retrop16239	not clustered or species-specific
mmuiretrom23008	primates-specific
mmu_retrop33740	not clustered or species-specific
mmu_retrop29746	not clustered or species-specific
mmu_retrop30637	primates-specific
mmuiretrop23105	eutherian-specific
mmu_retrop06579	eutherian-specific
mmu_retrom17233	not clustered or species-specific
mmu_retrom36753	not clustered or species-specific
mmu_retrop16364	not clustered or species-specific
mmu_retrom31160	vertebrates-specific
mmu_retrop37081	not clustered or species-specific
mmu_retrop28299	not clustered or species-specific
mmuiretrom29751	vertebrates-specific
mmu_retrop24602	not clustered or species-specific
mmuiretrop10780	eutherian-specific
mmu_retrom04453	primates-specific
mmuiretrop30551	eutherian-specific
mmu_retrom04059	not clustered or species-specific
mmu_retrom30307	therian-specific
mmu_retrom09741	not clustered or species-specific
mmu_retrom08459	mammals-specific
mmu_retrop28210	not clustered or species-specific
mmuiretrop23282	not clustered or species-specific
mmu_retrom25745	not clustered or species-specific
mmu_retrom30999	not clustered or species-specific
mmu_retrom23238	primates-specific
mmu_retrom09433	not clustered or species-specific

## Sheet: Mouse
# Supplemental Table S7: mouse retrogenes
# The age of retrogenes not clustered in retrocopy families was set to "not clustered or species-specific"
retro_ID	age
mus_retrom105787	not clustered or species-specific
musiretrop13650	not clustered or species-specific
mus_retrom97643	eutherian-specific
musiretrop34559	rodents-specific
mus_retrop54426	rodents-specific
mus_retrom59026	eutherian-specific
mus_retrom98541	eutherian-specific
mus_retrom79426	rodents-specific
mus_retrom74444	not clustered or species-specific
mus_retrom96905	not clustered or species-specific
mus_retrop91832	rodents-specific
mus_retrom42194	rodents-specific
musiretrop03335	not clustered or species-specific
mus_retrop71221	eutherian-specific
musiretrom09851	not clustered or species-specific
mus_retrop114705	rodents-specific
mus_retrom68722	not clustered or species-specific
mus_retrop96975	not clustered or species-specific
musiretrom35009	rodents-specific
musiretrom03954	rodents-specific
musiretrom09420	not clustered or species-specific
mus_retrom108015	not clustered or species-specific
mus_retrop46015	vertebrates-specific
mus_retrom49525	not clustered or species-specific
mus_retrom91886	therian-specific
mus_retrop70539	vertebrates-specific
musiretrop42223	not clustered or species-specific
musiretrom31520	not clustered or species-specific
mus_retrop55007	rodents-specific
musiretrom32145	not clustered or species-specific
mus_retrop112646	mammals-specific
mus_retrop70634	eutherian-specific
mus_retrop98507	rodents-specific
mus_retrop79653	rodents-specific
musiretrom31734	not clustered or species-specific
mus_retrop58367	not clustered or species-specific
musiretrop24940	eutherian-specific
musiretrom41190	not clustered or species-specific
mus_retrop54154	not clustered or species-specific
mus_retrop53990	rodents-specific
mus_retrom50473	not clustered or species-specific
mus_retrop89795	eutherian-specific
mus_retrom109003	not clustered or species-specific
mus_retrop93743	therian-specific
musiretrop06657	eutherian-specific
mus_retrop71329	vertebrates-specific
mus_retrop100933	eutherian-specific
mus_retrom72520	rodents-specific
mus_retrom106670	eutherian-specific
musiretrom34214	rodents-specific
mus_retrom80006	not clustered or species-specific
mus_retrop114567	not clustered or species-specific
mus_retrop53974	rodents-specific
mus_retrop79547	not clustered or species-specific
mus_retrop101570	eutherian-specific
mus_retrom100099	not clustered or species-specific
musiretrop02012	not clustered or species-specific
musiretrom37121	not clustered or species-specific
musiretrop11978	not clustered or species-specific
musiretrom03116	eutherian-specific
musiretrom01651	not clustered or species-specific
musiretrop34975	not clustered or species-specific
mus_retrop97914	not clustered or species-specific
musiretrom14733	not clustered or species-specific
mus_retrop74469	vertebrates-specific
mus_retrop102165	rodents-specific
mus_retrop100802	not clustered or species-specific
mus_retrom43775	eutherian-specific
mus_retrom61496	rodents-specific
musiretrop42304	not clustered or species-specific
musiretrom22766	not clustered or species-specific
mus_retrom106183	not clustered or species-specific
mus_retrom41298	eutherian-specific
mus_retrop91863	not clustered or species-specific
mus_retrop56772	rodents-specific
mus_retrop70614	not clustered or species-specific
musiretrom10233	not clustered or species-specific
mus_retrop74286	vertebrates-specific
mus_retrop91945	vertebrates-specific
mus_retrom80482	rodents-specific
mus_retrop92578	rodents-specific
musiretrom09399	not clustered or species-specific
mus_retrop112305	not clustered or species-specific
mus_retrom50572	therian-specific
mus_retrop66867	not clustered or species-specific
musiretrom41448	not clustered or species-specific
mus_retrop48873	not clustered or species-specific
mus_retrom95435	not clustered or species-specific
mus_retrom107691	rodents-specific
mus_retrop46040	eutherian-specific
mus_retrop114001	eutherian-specific
mus_retrom72541	rodents-specific
musiretrom23177	not clustered or species-specific
mus_retrom91243	eutherian-specific
mus_retrop93365	rodents-specific
mus_retrom102170	eutherian-specific
mus_retrop46229	rodents-specific
musiretrop22911	not clustered or species-specific
mus_retrom46702	not clustered or species-specific
musiretrop30459	eutherian-specific
mus_retrop94508	not clustered or species-specific
mus_retrom90513	rodents-specific
mus_retrop73764	eutherian-specific
mus_retrom96889	eutherian-specific
mus_retrop45870	rodents-specific
mus_retrop78825	mammals-specific
mus_retrop69294	not clustered or species-specific
mus_retrom124477	not clustered or species-specific
mus_retrom41057	eutherian-specific
mus_retrom69527	rodents-specific
musiretrom03012	eutherian-specific
mus_retrom50460	eutherian-specific
mus_retrom107434	vertebrates-specific
mus_retrom43546	eutherian-specific
musiretrop01810	not clustered or species-specific
musiretrop32793	not clustered or species-specific
mus_retrom79661	not clustered or species-specific
mus_retrom123929	rodents-specific
mus_retrom80325	rodents-specific
mus_retrom108053	rodents-specific
mus_retrop95187	not clustered or species-specific
mus_retrom79905	rodents-specific
mus_retrom79904	not clustered or species-specific
mus_retrop101970	eutherian-specific
mus_retrom97507	vertebrates-specific
mus_retrom103568	rodents-specific
musiretrom05923	not clustered or species-specific
mus_retrop50179	rodents-specific
mus_retrom42698	rodents-specific
mus_retrop76052	rodents-specific
musiretrom01809	not clustered or species-specific
mus_retrop51942	not clustered or species-specific
musiretrom38462	vertebrates-specific
mus_retrom105106	not clustered or species-specific
mus_retrom49633	vertebrates-specific
musiretrop08845	eutherian-specific
mus_retrom72439	not clustered or species-specific
mus_retrop45861	eutherian-specific
musiretrop34327	rodents-specific
mus_retrom70030	not clustered or species-specific
mus_retrop96971	eutherian-specific
musiretrop30372	eutherian-specific
mus_retrop42338	not clustered or species-specific
mus_retrom96895	eutherian-specific
mus_retrom69093	not clustered or species-specific
mus_retrom98503	not clustered or species-specific
mus_retrom43922	eutherian-specific
mus_retrom67043	not clustered or species-specific
mus_retrom98154	not clustered or species-specific
mus_retrom59282	rodents-specific
mus_retrop54112	not clustered or species-specific
mus_retrom80028	not clustered or species-specific
mus_retrom69903	rodents-specific
mus_retrom80336	not clustered or species-specific
musiretrom01689	not clustered or species-specific
mus_retrop94954	not clustered or species-specific
mus_retrop45643	rodents-specific
musiretrom07320	not clustered or species-specific
mus_retrop52885	eutherian-specific
mus_retrom80165	not clustered or species-specific
mus_retrop86910	not clustered or species-specific
musiretrom15167	eutherian-specific
mus_retrop98309	not clustered or species-specific
mus_retrom106418	eutherian-specific
mus_retrom100617	rodents-specific
musiretrom22866	rodents-specific
mus_retrom96655	vertebrates-specific
musiretrop03405	rodents-specific
mus_retrop74711	vertebrates-specific
mus_retrop44349	rodents-specific
mus_retrop92564	not clustered or species-specific
musiretrom28553	rodents-specific
mus_retrop101020	eutherian-specific
musiretrom05896	not clustered or species-specific
mus_retrom73056	rodents-specific
mus_retrop100263	eutherian-specific
mus_retrom40716	eutherian-specific
mus_retrop112192	eutherian-specific
mus_retrop49458	mammals-specific
mus_retrop53855	eutherian-specific
mus_retrop92527	rodents-specific
mus_retrom97891	rodents-specific
mus_retrom73575	not clustered or species-specific
mus_retrom73209	not clustered or species-specific
mus_retrom101969	rodents-specific
mus_retrom69830	rodents-specific
mus_retrom42691	rodents-specific
mus_retrom42065	not clustered or species-specific
musiretrop35553	not clustered or species-specific
musiretrop19621	rodents-specific
musiretrop01683	not clustered or species-specific
mus_retrom49442	rodents-specific
mus_retrom60030	not clustered or species-specific
mus_retrop44371	rodents-specific
mus_retrom46474	eutherian-specific
musiretrom01643	not clustered or species-specific
mus_retrop113049	vertebrates-specific
musiretrom21215	vertebrates-specific
mus_retrop53005	therian-specific
musiretrom01623	not clustered or species-specific
musiretrop37999	vertebrates-specific
mus_retrom122965	not clustered or species-specific
musiretrom13624	rodents-specific
mus_retrop112296	eutherian-specific
musiretrom36849	eutherian-specific
mus_retrom125011	eutherian-specific
mus_retrom99082	eutherian-specific
musiretrop01979	not clustered or species-specific
mus_retrom70053	rodents-specific
musiretrom03960	rodents-specific
mus_retrop100895	eutherian-specific
mus_retrom99763	therian-specific
mus_retrop56403	not clustered or species-specific

## Sheet: Rat
# Supplemental Table S7: rat retrogenes
# The age of retrogenes not clustered in retrocopy families was set to "not clustered or species-specific"
retro_ID	age
rno_retrop02443	rodents-specific
rnoiretrom18953	eutherian-specific
rnoiretrom15998	not clustered or species-specific
rno_retrom05928	not clustered or species-specific
rnoiretrop28634	not clustered or species-specific
rno_retrop02522	vertebrates-specific
rno_retrom00957	eutherian-specific
rno_retrop01277	not clustered or species-specific
rnoiretrop37081	not clustered or species-specific
rno_retrom06038	not clustered or species-specific
rnoiretrom15067	not clustered or species-specific
rnoiretrop29007	not clustered or species-specific
rnoiretrom44124	not clustered or species-specific
rnoiretrop39111	vertebrates-specific
rno_retrom02258	eutherian-specific
rno_retrom03657	therian-specific
rno_retrop00221	not clustered or species-specific
rnoiretrom36039	vertebrates-specific
rno_retrom01895	not clustered or species-specific
rnoiretrop26842	not clustered or species-specific
rnoiretrop26500	rodents-specific
rno_retrop02322	not clustered or species-specific
rno_retrop02038	not clustered or species-specific
rno_retrom07159	therian-specific
rnoiretrop30480	not clustered or species-specific
rnoiretrop42354	not clustered or species-specific
rno_retrom04199	rodents-specific
rno_retrom05347	not clustered or species-specific
rno_retrom06664	not clustered or species-specific
rnoiretrom12969	not clustered or species-specific
rno_retrom04213	rodents-specific
rno_retrop01114	not clustered or species-specific
rnoiretrop27194	not clustered or species-specific
rno_retrom02464	not clustered or species-specific
rnoiretrom18873	not clustered or species-specific
rno_retrom02345	not clustered or species-specific
rnoiretrop35637	mammals-specific
rno_retrom04139	rodents-specific
rnoiretrom31144	rodents-specific
rno_retrom04332	eutherian-specific
rnoiretrop24671	eutherian-specific
rnoiretrom46079	rodents-specific
rnoiretrop16663	not clustered or species-specific
rno_retrom04137	rodents-specific
rno_retrom03495	not clustered or species-specific
rno_retrom05963	rodents-specific
rno_retrom06182	not clustered or species-specific
rnoiretrop45470	not clustered or species-specific
rno_retrom05481	not clustered or species-specific
rno_retrop01392	not clustered or species-specific
rno_retrom01991	vertebrates-specific
rno_retrom03501	eutherian-specific
rno_retrop02293	not clustered or species-specific
rnoiretrop26474	not clustered or species-specific
rnoiretrop31219	not clustered or species-specific
rnoiretrop26572	rodents-specific
rno_retrop01158	not clustered or species-specific
rnoiretrop29372	rodents-specific
rno_retrom02591	not clustered or species-specific
rno_retrom01083	not clustered or species-specific
rno_retrom02058	not clustered or species-specific
rno_retrop00664	vertebrates-specific
rno_retrom04209	not clustered or species-specific
rno_retrom04200	eutherian-specific
rnoiretrom23055	eutherian-specific
rnoiretrop25545	not clustered or species-specific
rno_retrom02682	not clustered or species-specific
rnoiretrom23402	rodents-specific
rnoiretrop24600	not clustered or species-specific
rno_retrom05553	not clustered or species-specific
rnoiretrop46431	rodents-specific
rnoiretrop35108	eutherian-specific
rno_retrom00975	not clustered or species-specific
rno_retrom02563	rodents-specific
rnoiretrop43951	not clustered or species-specific
rnoiretrop31736	not clustered or species-specific
rno_retrom05247	not clustered or species-specific
rnoiretrom32512	not clustered or species-specific
rnoiretrop27754	not clustered or species-specific
rno_retrom03205	rodents-specific
rno_retrop00249	rodents-specific
rnoiretrop46976	rodents-specific
rno_retrom01319	not clustered or species-specific
rnoiretrop23994	vertebrates-specific
rnoiretrop38530	not clustered or species-specific
rnoiretrop30055	not clustered or species-specific
rno_retrom00423	vertebrates-specific
rno_retrom03639	not clustered or species-specific
rno_retrom05499	not clustered or species-specific
rnoiretrop28888	not clustered or species-specific
rnoiretrop42749	therian-specific
rnoiretrom03774	eutherian-specific
rnoiretrop25027	rodents-specific
rnoiretrom03962	rodents-specific
rnoiretrop32246	not clustered or species-specific
rnoiretrop00162	not clustered or species-specific
rnoiretrop45383	not clustered or species-specific
rnoiretrop37794	not clustered or species-specific
rno_retrom07537	not clustered or species-specific
rnoiretrop45316	rodents-specific
rnoiretrop50079	not clustered or species-specific
rnoiretrom30984	not clustered or species-specific
rnoiretrop36907	not clustered or species-specific
rno_retrop00610	rodents-specific
rno_retrom03206	rodents-specific
rnoiretrom12303	eutherian-specific
rno_retrom06078	not clustered or species-specific
rnoiretrom21377	not clustered or species-specific
rnoiretrom17755	not clustered or species-specific
rnoiretrop23726	rodents-specific
rno_retrop00449	rodents-specific
rno_retrop00448	rodents-specific
rno_retrom01065	not clustered or species-specific
rno_retrom05705	rodents-specific
rnoiretrop27011	not clustered or species-specific
rno_retrom02477	vertebrates-specific
rnoiretrop35273	not clustered or species-specific
rno_retrom05148	rodents-specific
rno_retrop02285	eutherian-specific
rnoiretrop47973	not clustered or species-specific
rno_retrom04152	rodents-specific
rno_retrom02344	rodents-specific
rno_retrop01176	not clustered or species-specific
rnoiretrom54125	not clustered or species-specific
rno_retrom05901	rodents-specific
rnoiretrop27666	rodents-specific
rnoiretrop47870	not clustered or species-specific
rno_retrop01833	rodents-specific
rno_retrop00765	mammals-specific
rnoiretrop29783	not clustered or species-specific
rnoiretrop29542	not clustered or species-specific
rno_retrom00493	not clustered or species-specific
rnoiretrom50451	not clustered or species-specific
rnoiretrom13712	rodents-specific
rnoiretrop43137	not clustered or species-specific
rnoiretrop44997	not clustered or species-specific
rnoiretrop34958	not clustered or species-specific
rnoiretrop51865	rodents-specific
rnoiretrop34937	eutherian-specific
rno_retrop02069	eutherian-specific
rnoiretrop42695	rodents-specific
rno_retrom05986	not clustered or species-specific
rno_retrom05410	not clustered or species-specific
rnoiretrom03218	rodents-specific
rno_retrom01395	not clustered or species-specific
rnoiretrop50949	not clustered or species-specific
rno_retrop01188	not clustered or species-specific
rnoiretrop36471	therian-specific
rnoiretrop35160	vertebrates-specific
rnoiretrop28782	rodents-specific
rnoiretrop23248	not clustered or species-specific
rno_retrop00678	eutherian-specific
rno_retrom04248	not clustered or species-specific
rnoiretrop51105	not clustered or species-specific
rnoiretrop47736	not clustered or species-specific
rnoiretrop28730	not clustered or species-specific
rno_retrom01172	not clustered or species-specific
rnoiretrop16398	eutherian-specific
rnoiretrop24697	not clustered or species-specific
rno_retrom02354	rodents-specific
rnoiretrop30074	eutherian-specific
rnoiretrop29325	rodents-specific
rno_retrom04166	rodents-specific
rno_retrom01276	not clustered or species-specific
rno_retrop00066	eutherian-specific
rno_retrom02668	not clustered or species-specific
rnoiretrop30464	not clustered or species-specific
rno_retrom03259	rodents-specific
rno_retrop00117	rodents-specific
rnoiretrop25180	not clustered or species-specific
rno_retrom04444	vertebrates-specific
rnoiretrop40570	not clustered or species-specific
rno_retrop00489	not clustered or species-specific
rnoiretrom04072	rodents-specific
rno_retrom02909	not clustered or species-specific
rno_retrom00516	eutherian-specific
rno_retrop01940	rodents-specific
rno_retrop00530	not clustered or species-specific
rnoiretrop27091	not clustered or species-specific
rno_retrom07517	eutherian-specific
rno_retrop01198	not clustered or species-specific
rno_retrom06277	rodents-specific
rnoiretrom29951	not clustered or species-specific
rnoiretrop37563	not clustered or species-specific
rnoiretrop41572	eutherian-specific
rnoiretrop28873	not clustered or species-specific
rnoiretrop42067	rodents-specific
rnoiretrop29830	not clustered or species-specific
rnoiretrop39959	rodents-specific
rnoiretrop45337	eutherian-specific
rnoiretrom12993	not clustered or species-specific
rno_retrom06212	not clustered or species-specific
rnoiretrop29402	not clustered or species-specific
rno_retrom01114	not clustered or species-specific
rno_retrom04192	not clustered or species-specific
rno_retrom01656	not clustered or species-specific
rno_retrop02493	eutherian-specific
rno_retrom06067	rodents-specific
rno_retrop01817	not clustered or species-specific
rno_retrom01207	not clustered or species-specific
rnoiretrop36353	rodents-specific
rno_retrom01825	rodents-specific
rno_retrom06531	not clustered or species-specific
rno_retrop00105	vertebrates-specific
rnoiretrom24409	eutherian-specific
rno_retrop00703	rodents-specific
rnoiretrop41183	mammals-specific
rno_retrop02312	vertebrates-specific
rnoiretrop24357	not clustered or species-specific
rnoiretrop14647	not clustered or species-specific
rnoiretrop01976	rodents-specific
rno_retrom00700	not clustered or species-specific
rno_retrom05320	eutherian-specific
rnoiretrop42635	eutherian-specific
rno_retrom03541	vertebrates-specific
rno_retrop01208	not clustered or species-specific
rnoiretrom05421	eutherian-specific
rnoiretrop47711	not clustered or species-specific
rnoiretrop51898	rodents-specific
rnoiretrop27187	not clustered or species-specific
rno_retrom04443	eutherian-specific
rno_retrom06929	rodents-specific
rnoiretrop25917	not clustered or species-specific
rnoiretrom01748	eutherian-specific
rno_retrom03633	eutherian-specific
rno_retrom01223	not clustered or species-specific
rno_retrom06444	not clustered or species-specific
rnoiretrop37512	not clustered or species-specific
rnoiretrom54172	not clustered or species-specific
rno_retrom06289	rodents-specific
rno_retrom04625	not clustered or species-specific
rnoiretrop29930	not clustered or species-specific
rnoiretrop25996	not clustered or species-specific
rnoiretrop29023	not clustered or species-specific
rno_retrom00468	not clustered or species-specific
rno_retrop00134	not clustered or species-specific
rnoiretrop44240	not clustered or species-specific
rno_retrom00583	eutherian-specific
rnoiretrop34555	not clustered or species-specific
rnoiretrom14651	not clustered or species-specific
rnoiretrop25459	not clustered or species-specific
rnoiretrop30147	not clustered or species-specific
rnoiretrop25750	not clustered or species-specific
rnoiretrop28248	not clustered or species-specific
rnoiretrop48331	not clustered or species-specific
rnoiretrom31774	not clustered or species-specific
rno_retrom05235	eutherian-specific
rnoiretrop26298	eutherian-specific
rnoiretrom23354	not clustered or species-specific
rnoiretrop29810	rodents-specific
rnoiretrom32490	not clustered or species-specific
rnoiretrop31331	not clustered or species-specific
rnoiretrom05940	not clustered or species-specific
rnoiretrop29661	not clustered or species-specific
rno_retrom04297	eutherian-specific
rno_retrom05585	not clustered or species-specific
rnoiretrop25674	not clustered or species-specific
rnoiretrop30799	rodents-specific
rnoiretrom53961	eutherian-specific
rnoiretrop30697	eutherian-specific
rnoiretrop30554	not clustered or species-specific
rno_retrop00723	not clustered or species-specific
rno_retrom03525	not clustered or species-specific
rnoiretrop37736	not clustered or species-specific
rnoiretrop24232	not clustered or species-specific
rno_retrop00645	rodents-specific
rnoiretrop52160	not clustered or species-specific
rno_retrop02029	not clustered or species-specific
rno_retrop00642	eutherian-specific
rno_retrom02690	eutherian-specific
rnoiretrop47742	not clustered or species-specific
rnoiretrop04195	rodents-specific
rnoiretrop42813	not clustered or species-specific
rno_retrom00350	vertebrates-specific
rno_retrop02235	rodents-specific
rno_retrom07089	eutherian-specific
rnoiretrop37110	not clustered or species-specific
rno_retrom05517	rodents-specific
rnoiretrop02331	not clustered or species-specific
rnoiretrom04285	not clustered or species-specific

## Sheet: Opossum
# Supplemental Table S7: opossum retrogenes
# The age of retrogenes not clustered in retrocopy families was set to "not clustered or species-specific"
retro_ID	age
mdo_retrom21985	not clustered or species-specific
mdoiretrom04110	vertebrates-specific
mdoiretrop21012	not clustered or species-specific
mdo_retrom00408	not clustered or species-specific
mdoiretrom05396	not clustered or species-specific
mdo_retrom09435	not clustered or species-specific
mdo_retrom26247	not clustered or species-specific
mdo_retrop00645	vertebrates-specific
mdoiretrop09956	not clustered or species-specific
mdoiretrom20488	not clustered or species-specific
mdo_retrop16345	not clustered or species-specific
mdo_retrom17744	not clustered or species-specific
mdoiretrom13616	marsupials-specific
mdo_retrop23314	not clustered or species-specific
mdo_retrop22662	not clustered or species-specific
mdo_retrom13271	not clustered or species-specific
mdoiretrom19409	not clustered or species-specific
mdo_retrop21021	vertebrates-specific
mdoiretrom13192	marsupials-specific
mdoiretrom12136	not clustered or species-specific
mdo_retrop08328	not clustered or species-specific
mdo_retrop17293	not clustered or species-specific
mdoiretrop18623	not clustered or species-specific
mdo_retrop09939	not clustered or species-specific
mdo_retrom00473	marsupials-specific
mdo_retrop01629	not clustered or species-specific
mdo_retrom26963	marsupials-specific
mdoiretrop22389	not clustered or species-specific
mdo_retrop04541	not clustered or species-specific
mdoiretrom11848	not clustered or species-specific
mdo_retrom27468	vertebrates-specific
mdoiretrom13350	not clustered or species-specific
mdo_retrop12666	not clustered or species-specific
mdo_retrom00399	marsupials-specific
mdoiretrop09866	not clustered or species-specific
mdo_retrop12835	marsupials-specific
mdo_retrop29878	not clustered or species-specific
mdoiretrom15132	not clustered or species-specific
mdo_retrom00391	marsupials-specific
mdoiretrom24812	not clustered or species-specific
mdoiretrom10769	not clustered or species-specific
mdo_retrom09037	marsupials-specific
mdoiretrom21894	vertebrates-specific
mdo_retrom25949	not clustered or species-specific
mdoiretrom10096	not clustered or species-specific
mdoiretrop12470	not clustered or species-specific
mdoiretrop04742	not clustered or species-specific
mdo_retrop01598	not clustered or species-specific
mdo_retrop26576	not clustered or species-specific
mdo_retrom12226	not clustered or species-specific
mdoiretrom04828	not clustered or species-specific
mdo_retrom24755	not clustered or species-specific
mdo_retrom00482	not clustered or species-specific
mdo_retrop00521	not clustered or species-specific
mdoiretrop20940	not clustered or species-specific
mdo_retrom07458	mammals-specific
mdo_retrop03702	vertebrates-specific
mdo_retrom28157	marsupials-specific
mdoiretrop18352	not clustered or species-specific
mdoiretrom29674	vertebrates-specific
mdoiretrom21259	not clustered or species-specific
mdoiretrom03861	not clustered or species-specific
mdoiretrom28870	not clustered or species-specific
mdo_retrop17921	marsupials-specific
mdoiretrop07653	vertebrates-specific
mdo_retrop12928	not clustered or species-specific
mdo_retrop31059	marsupials-specific
mdo_retrop15690	marsupials-specific
mdoiretrom29350	marsupials-specific
mdoiretrom17090	not clustered or species-specific
mdo_retrop03297	marsupials-specific
mdo_retrop04817	not clustered or species-specific
mdoiretrom04836	not clustered or species-specific
mdo_retrop00927	not clustered or species-specific
mdo_retrop11845	marsupials-specific
mdo_retrom25954	not clustered or species-specific
mdo_retrop11479	not clustered or species-specific
mdo_retrop29163	not clustered or species-specific
mdo_retrop00882	marsupials-specific
mdo_retrop00883	not clustered or species-specific
mdo_retrop21291	not clustered or species-specific
mdoiretrop01762	not clustered or species-specific
mdo_retrop00609	not clustered or species-specific
mdoiretrop11347	not clustered or species-specific
mdo_retrom21231	not clustered or species-specific
mdo_retrom08205	marsupials-specific
mdo_retrom25495	marsupials-specific
mdo_retrop05004	not clustered or species-specific
mdoiretrom28508	marsupials-specific
mdoiretrom10596	not clustered or species-specific
mdo_retrom00578	not clustered or species-specific
mdoiretrop07230	not clustered or species-specific
mdoiretrom25978	not clustered or species-specific
mdoiretrop20313	not clustered or species-specific
mdo_retrom00480	not clustered or species-specific
mdo_retrom29792	not clustered or species-specific
mdoiretrop20584	not clustered or species-specific
mdo_retrop31496	not clustered or species-specific
mdo_retrop07519	not clustered or species-specific
mdo_retrom16462	not clustered or species-specific
mdoiretrop17159	not clustered or species-specific
mdo_retrop30082	marsupials-specific
mdo_retrop16555	marsupials-specific
mdo_retrom05247	not clustered or species-specific
mdo_retrop08296	not clustered or species-specific
mdo_retrom00334	not clustered or species-specific
mdo_retrom22905	not clustered or species-specific
mdo_retrop15960	therian-specific
mdo_retrop05443	therian-specific
mdoiretrop21616	vertebrates-specific
mdo_retrom00548	not clustered or species-specific
mdoiretrop12632	not clustered or species-specific
mdo_retrop14478	marsupials-specific
mdoiretrom05124	not clustered or species-specific
mdo_retrop17500	not clustered or species-specific
mdo_retrop12081	vertebrates-specific
mdo_retrom00547	not clustered or species-specific
mdoiretrop06131	marsupials-specific
mdo_retrom23578	not clustered or species-specific
mdoiretrom17372	not clustered or species-specific
mdoiretrom17279	not clustered or species-specific
mdoiretrom16569	marsupials-specific
mdoiretrom07441	not clustered or species-specific
mdo_retrom20393	not clustered or species-specific
mdoiretrop29815	marsupials-specific
mdo_retrom28002	not clustered or species-specific
mdoiretrom29523	not clustered or species-specific
mdoiretrop12168	not clustered or species-specific
mdo_retrop05430	not clustered or species-specific
mdo_retrop27685	not clustered or species-specific
mdoiretrom20127	not clustered or species-specific
mdo_retrop00185	not clustered or species-specific
mdo_retrop11450	not clustered or species-specific
mdoiretrom14066	not clustered or species-specific
mdoiretrop20420	not clustered or species-specific
mdo_retrom00875	not clustered or species-specific
mdo_retrom11742	not clustered or species-specific
mdoiretrom23528	not clustered or species-specific
mdoiretrop15857	marsupials-specific
mdo_retrom00323	not clustered or species-specific
mdo_retrom03906	not clustered or species-specific
mdo_retrom12143	marsupials-specific
mdo_retrop21431	not clustered or species-specific
mdo_retrom25782	not clustered or species-specific
mdoiretrom28579	not clustered or species-specific
mdo_retrop00450	marsupials-specific
mdoiretrom17531	not clustered or species-specific
mdoiretrop03049	not clustered or species-specific
mdo_retrom00202	marsupials-specific
mdo_retrop00347	marsupials-specific
mdoiretrom05857	not clustered or species-specific
mdoiretrop26432	marsupials-specific
mdo_retrom08393	not clustered or species-specific
mdoiretrop11017	not clustered or species-specific
mdo_retrom25988	not clustered or species-specific
mdo_retrop22277	not clustered or species-specific
mdo_retrom21173	marsupials-specific
mdoiretrop16452	not clustered or species-specific
mdo_retrom00515	not clustered or species-specific
mdoiretrom03749	not clustered or species-specific
mdo_retrop00286	not clustered or species-specific
mdoiretrom17040	not clustered or species-specific
mdo_retrom29312	marsupials-specific
mdo_retrop26985	marsupials-specific
mdoiretrop04902	not clustered or species-specific
mdoiretrom17953	not clustered or species-specific
mdo_retrop11440	marsupials-specific
mdo_retrom07982	marsupials-specific
mdoiretrom21644	not clustered or species-specific
mdoiretrop20903	not clustered or species-specific
mdo_retrop08836	marsupials-specific
mdo_retrom25029	not clustered or species-specific
mdoiretrom14010	not clustered or species-specific
mdo_retrop29131	marsupials-specific
mdo_retrom14831	not clustered or species-specific
mdo_retrop14356	not clustered or species-specific
mdo_retrop16339	not clustered or species-specific
mdo_retrop00562	not clustered or species-specific
mdo_retrop10697	not clustered or species-specific
mdoiretrom14593	not clustered or species-specific
mdoiretrop20333	not clustered or species-specific
mdo_retrom00217	not clustered or species-specific
mdo_retrom05595	not clustered or species-specific
mdoiretrop25297	not clustered or species-specific
mdo_retrop05408	not clustered or species-specific
mdo_retrom11284	vertebrates-specific
mdo_retrom16003	therian-specific
mdoiretrop13055	not clustered or species-specific
mdoiretrom15388	not clustered or species-specific
mdo_retrop00465	not clustered or species-specific
mdoiretrom17423	not clustered or species-specific
mdo_retrom14145	not clustered or species-specific
mdo_retrop06850	not clustered or species-specific
mdoiretrom21113	not clustered or species-specific
mdoiretrop28807	not clustered or species-specific
mdoiretrop04873	not clustered or species-specific
mdoiretrom21692	not clustered or species-specific
mdo_retrop21553	not clustered or species-specific
mdoiretrop25447	not clustered or species-specific
mdo_retrop25563	vertebrates-specific
mdoiretrom13225	not clustered or species-specific
mdo_retrop12801	not clustered or species-specific
mdo_retrom10752	not clustered or species-specific
mdo_retrom05402	marsupials-specific
mdo_retrom05444	marsupials-specific
mdoiretrop10550	not clustered or species-specific
mdo_retrop24405	not clustered or species-specific
mdoiretrop15978	marsupials-specific
mdo_retrop00572	marsupials-specific
mdo_retrop13483	not clustered or species-specific
mdo_retrom05323	not clustered or species-specific
mdoiretrom25691	not clustered or species-specific
mdo_retrop19415	not clustered or species-specific
mdoiretrop16592	not clustered or species-specific
mdoiretrom23783	not clustered or species-specific
mdo_retrom19724	not clustered or species-specific
mdo_retrom00341	marsupials-specific
mdoiretrom18424	not clustered or species-specific
mdo_retrom08781	marsupials-specific
mdoiretrom12958	not clustered or species-specific
mdoiretrom06701	not clustered or species-specific
mdo_retrop01016	not clustered or species-specific
mdo_retrop00032	not clustered or species-specific
mdoiretrop16623	not clustered or species-specific
mdoiretrom26257	not clustered or species-specific
mdoiretrop18789	not clustered or species-specific
mdoiretrom26313	not clustered or species-specific
mdo_retrop00498	not clustered or species-specific
mdo_retrop07395	not clustered or species-specific
mdoiretrom26968	vertebrates-specific
mdo_retrop07402	not clustered or species-specific
mdo_retrom26176	not clustered or species-specific
mdo_retrop25519	marsupials-specific
mdoiretrom28501	not clustered or species-specific
mdo_retrop13185	not clustered or species-specific
mdo_retrom00102	not clustered or species-specific
mdoiretrom11352	not clustered or species-specific
mdo_retrop30333	not clustered or species-specific
mdo_retrop00546	marsupials-specific
mdo_retrom25843	marsupials-specific
mdoiretrop16765	not clustered or species-specific
mdo_retrom27996	therian-specific
mdoiretrom05397	not clustered or species-specific
mdo_retrom17040	therian-specific
mdo_retrop12248	marsupials-specific
mdo_retrop16118	not clustered or species-specific
mdo_retrop03667	not clustered or species-specific
mdo_retrop00371	not clustered or species-specific
mdoiretrom23257	not clustered or species-specific
mdoiretrop22255	not clustered or species-specific
mdo_retrop18941	not clustered or species-specific
mdo_retrom05215	marsupials-specific
mdo_retrom19157	not clustered or species-specific
mdo_retrop29310	not clustered or species-specific
mdo_retrop16117	marsupials-specific
mdoiretrop25820	not clustered or species-specific

## Sheet: Platypus
# Supplemental Table S7: platypus retrogenes
# The age of retrogenes not clustered in retrocopy families was set to "not clustered or species-specific"
retro_ID	age
oan_retrop16520	not clustered or species-specific
oan_retrop131774	not clustered or species-specific
oaniretrop02015	not clustered or species-specific
oan_retrom36574	not clustered or species-specific
oan_retrop72203	not clustered or species-specific
oaniretrop03903	not clustered or species-specific
oaniretrom08023	not clustered or species-specific
oaniretrom09786	not clustered or species-specific
oan_retrop17039	not clustered or species-specific
oan_retrom45776	not clustered or species-specific
oan_retrop126234	not clustered or species-specific
oan_retrom129123	not clustered or species-specific
oan_retrop71248	not clustered or species-specific
oan_retrom00380	not clustered or species-specific
oaniretrop07332	not clustered or species-specific
oaniretrop11805	vertebrates-specific
oan_retrop15828	not clustered or species-specific
oan_retrop22443	not clustered or species-specific
oan_retrom129524	not clustered or species-specific
oaniretrop06229	vertebrates-specific
oaniretrom02686	not clustered or species-specific
oaniretrom06956	not clustered or species-specific
oan_retrop119743	vertebrates-specific
oan_retrom126907	not clustered or species-specific
oaniretrop01899	not clustered or species-specific
oaniretrop03553	not clustered or species-specific
oan_retrop45880	not clustered or species-specific
oaniretrom02231	not clustered or species-specific
oan_retrom88909	not clustered or species-specific
oaniretrop02432	not clustered or species-specific
oan_retrop125959	vertebrates-specific
oan_retrop15038	not clustered or species-specific
oan_retrop15036	not clustered or species-specific
oaniretrom02329	not clustered or species-specific
oaniretrom03030	not clustered or species-specific
oan_retrop131030	not clustered or species-specific
oan_retrop127541	mammals-specific
oan_retrom08774	not clustered or species-specific
oaniretrop02228	not clustered or species-specific
oaniretrom09488	vertebrates-specific
oan_retrop36147	not clustered or species-specific
oan_retrop133053	not clustered or species-specific
oan_retrom12715	not clustered or species-specific
oan_retrop06893	not clustered or species-specific
oaniretrom05180	not clustered or species-specific
oan_retrop81589	not clustered or species-specific
oaniretrop02191	not clustered or species-specific
oan_retrom55179	not clustered or species-specific
oan_retrom10360	not clustered or species-specific
oaniretrom04596	not clustered or species-specific
oaniretrom02468	not clustered or species-specific
oaniretrom04180	not clustered or species-specific
oaniretrop10677	not clustered or species-specific
oan_retrom65879	not clustered or species-specific
oaniretrom07000	not clustered or species-specific
oan_retrop125987	not clustered or species-specific
oaniretrop05060	not clustered or species-specific
oan_retrom47844	not clustered or species-specific
oan_retrom05834	not clustered or species-specific
oaniretrom03045	not clustered or species-specific
oan_retrom17703	not clustered or species-specific
oan_retrop107037	not clustered or species-specific
oan_retrom127499	mammals-specific
oaniretrom11968	not clustered or species-specific
oan_retrop74679	not clustered or species-specific
oaniretrop04298	not clustered or species-specific
oaniretrop05784	not clustered or species-specific
oan_retrop126179	not clustered or species-specific
oan_retrop15179	not clustered or species-specific
oaniretrop03848	not clustered or species-specific
oan_retrop131877	not clustered or species-specific
oan_retrom131171	not clustered or species-specific
oaniretrop09672	not clustered or species-specific
oan_retrop133005	not clustered or species-specific
oan_retrom16712	not clustered or species-specific
oan_retrop00261	not clustered or species-specific
oaniretrop02384	not clustered or species-specific
oaniretrom08052	not clustered or species-specific
oan_retrom129105	mammals-specific
oaniretrop02514	not clustered or species-specific
oan_retrop00875	not clustered or species-specific
oaniretrom10399	vertebrates-specific
oan_retrom69557	not clustered or species-specific
oan_retrop82599	not clustered or species-specific
oan_retrom128595	not clustered or species-specific
oan_retrom128591	not clustered or species-specific
oaniretrop07550	not clustered or species-specific
oaniretrom06446	not clustered or species-specific

## Sheet: Chicken
# Supplemental Table S7: chicken retrogenes
# The age of retrogenes not clustered in retrocopy families was set to "not clustered or species-specific"
retro_ID	age
ggairetrop05638	not clustered or species-specific
gga_retrop28789	vertebrates-specific
gga_retrom38547	vertebrates-specific
ggairetrop07140	vertebrates-specific
gga_retrop28515	not clustered or species-specific
ggairetrom02117	vertebrates-specific
gga_retrom37706	not clustered or species-specific
gga_retrom35658	not clustered or species-specific
ggairetrop06785	vertebrates-specific
ggairetrop04656	not clustered or species-specific
gga_retrom34034	vertebrates-specific
gga_retrop26238	not clustered or species-specific
ggairetrop04772	not clustered or species-specific
gga_retrop28989	vertebrates-specific
ggairetrop07623	not clustered or species-specific
ggairetrop01281	vertebrates-specific
ggairetrop06424	not clustered or species-specific
gga_retrop28390	vertebrates-specific
gga_retrop31095	vertebrates-specific
ggairetrop05118	not clustered or species-specific
ggairetrom02121	vertebrates-specific
ggairetrop03163	not clustered or species-specific
gga_retrom39850	not clustered or species-specific
gga_retrom39838	not clustered or species-specific
gga_retrop25614	not clustered or species-specific
gga_retrom34241	not clustered or species-specific
ggairetrom03548	vertebrates-specific
gga_retrop26346	not clustered or species-specific
ggairetrom01441	not clustered or species-specific
ggairetrom06696	vertebrates-specific
ggairetrop04230	vertebrates-specific
gga_retrom36736	not clustered or species-specific
gga_retrom38367	not clustered or species-specific
gga_retrop30433	vertebrates-specific
ggairetrom04288	not clustered or species-specific
gga_retrop25589	vertebrates-specific
