# Supplementary material for: The life history of retrocopies illuminates the evolution of new mammalian genes
Source: HighWire-hosted journal article supplement (doi:10.1101/gr.198473.115), 2016-01-04
Supplement: Supplemental_Tables.zip [file Supplemental_Table_S8.xlsx]

## Sheet: Sheet1
# Supplemental Table S8: out of X retrogene movement in therian species
# The expected number of X-to-A vs others (A-to-A + A-to-X) retrogenes were obtained as described in the Methods section
# n° of Obs vs Exp retrogenes moving between chromosomes were tested using a chi-squared goodness-of-fit test; P values were corrected for multiple testing
human
obs_X_to_A	34
obs_A_to_X + obs_A_to_A	165
exp_X_to_A	7.85963
exp_A_to_X + exp_A_to_A	191.14
excess_X_to_A	332.591
chisq.test P (Benjamini-Hockberg adjusted)	7.36678e-21
chimpanzee
obs_X_to_A	32
obs_A_to_X + obs_A_to_A	192
exp_X_to_A	8.15061
exp_A_to_X + exp_A_to_A	215.849
excess_X_to_A	292.608
chisq.test P (Benjamini-Hockberg adjusted)	2.30816e-17
gorilla
obs_X_to_A	34
obs_A_to_X + obs_A_to_A	181
exp_X_to_A	8.60666
exp_A_to_X + exp_A_to_A	206.393
excess_X_to_A	295.043
chisq.test P (Benjamini-Hockberg adjusted)	1.91556e-18
orangutan
obs_X_to_A	33
obs_A_to_X + obs_A_to_A	161
exp_X_to_A	8.05526
exp_A_to_X + exp_A_to_A	185.945
excess_X_to_A	309.67
chisq.test P (Benjamini-Hockberg adjusted)	7.08726e-19
macaque
obs_X_to_A	27
obs_A_to_X + obs_A_to_A	170
exp_X_to_A	8.50903
exp_A_to_X + exp_A_to_A	188.491
excess_X_to_A	217.31
chisq.test P (Benjamini-Hockberg adjusted)	9.04759e-11
mouse
obs_X_to_A	43
obs_A_to_X + obs_A_to_A	170
exp_X_to_A	8.3275
exp_A_to_X + exp_A_to_A	204.672
excess_X_to_A	416.361
chisq.test P (Benjamini-Hockberg adjusted)	1.11613e-33
rat
obs_X_to_A	40
obs_A_to_X + obs_A_to_A	239
exp_X_to_A	11.5287
exp_A_to_X + exp_A_to_A	267.471
excess_X_to_A	246.96
chisq.test P (Benjamini-Hockberg adjusted)	1.57378e-17
opossum
obs_X_to_A	27
obs_A_to_X + obs_A_to_A	229
exp_X_to_A	5.96909
exp_A_to_X + exp_A_to_A	250.031
excess_X_to_A	352.33
chisq.test P (Benjamini-Hockberg adjusted)	4.89837e-18
