# Supplementary material for: The life history of retrocopies illuminates the evolution of new mammalian genes
Source: HighWire-hosted journal article supplement (doi:10.1101/gr.198473.115), 2016-01-04
Supplement: Supplemental_Tables.zip [file Supplemental_Table_S9.xlsx]

## Sheet: Human
# Supplemental Table S9: dosage compensation of human out of X retrogenes
# Each group contains the the expression values (measured in FPKM) for: a) the parental gene ortholog in chicken; b) the parental gene (on the X chr); c) the expression of the parental gene + that of its derived autosomal retrogene
# Only cases in which the parental X-linked gene had an annotated Ensembl (rel. 65) ortholog in chicken could be analysed
	Brain	Cerebellum	Heart	Kidney	Liver	Testis
ENSGALG00000006457	35.7413	32.911	29.3611	18.3112	24.2285	49.0956
ENSG00000147274	29.6783	51.1612	53.3038	47.7384	43.9767	23.6527
hsa_retrop06597 + ENSG00000147274	29.6783	51.1612	53.3038	47.7384	43.9767	38.4239
ENSGALG00000006760	12.058	9.32364	8.50015	9.41133	9.78951	13.241
ENSG00000101811	3.65109	5.21083	2.43901	3.27569	2.42895	6.50286
hsa_retrom04584 + ENSG00000101811	12.0617	12.5576	11.7865	8.6628	8.39279	10.6245
ENSGALG00000004025	13.4537	14.6693	17.3879	14.7267	24.7436	27.2766
ENSG00000134597	6.49327	6.14612	7.19262	7.7903	7.15493	4.13166
hsa_retrom31563 + ENSG00000134597	6.49327	6.14612	7.19262	7.79031	7.15493	6.81394
ENSGALG00000009139	25.2969	25.9935	25.2516	18.9269	15.5023	16.602
ENSG00000155984	11.2293	8.89565	14.315	9.68846	6.51151	14.1233
hsa_retrom24471 + ENSG00000155984	14.6985	11.1169	19.5267	13.3334	8.49424	18.2597
ENSGALG00000007510	19.3434	7.84051	8.48884	3.4231	4.17605	27.3326
ENSG00000147400	18.5402	9.80747	16.0554	57.698	14.6594	11.4006
hsa_retrop16833 + ENSG00000147400	18.5402	9.80747	16.0554	57.698	14.6594	153.51
ENSGALG00000007936	158.769	129.871	129.498	257.327	321.139	92.9929
ENSG00000102144	158.339	128.61	205.788	282.231	127.631	34.4008
hsa_retrom34525 + ENSG00000102144	158.339	128.61	205.788	282.231	127.631	144.154
ENSGALG00000016285	7.41569	4.62376	25.5033	53.8587	82.4708	207.091
ENSG00000198814	2.05077	1.53948	2.82692	28.4031	7.9595	5.11441
hsa_retrom29909 + ENSG00000198814	2.05077	1.53948	2.82692	28.4031	7.9595	52.8517
ENSGALG000000162851	7.41569	4.62376	25.5033	53.8587	82.4708	207.091
ENSG000001988141	2.05077	1.53948	2.82692	28.4031	7.9595	5.11441
hsa_retrom30504 + ENSG000001988141	2.05077	1.53948	2.82692	28.4031	7.9595	9.19376
ENSGALG000000064571	35.7413	32.911	29.3611	18.3112	24.2285	49.0956
ENSG000001472741	29.6783	51.1612	53.3038	47.7384	43.9767	23.6527
hsa_retrom01308 + ENSG000001472741	33.1829	53.5807	55.9708	49.4455	46.0642	27.3897
ENSGALG00000004856	10.6649	7.93272	8.7573	7.98604	8.38127	23.8635
ENSG00000198088	0.0367546	0.140836	1.07705	5.97441	0.70966	7.35803
hsa_retrom20014 + ENSG00000198088	5.82454	6.97336	8.1823	12.9334	8.98738	21.6832
ENSGALG00000004908	52.0036	35.4901	50.6181	37.211	14.1345	43.2902
ENSG00000147224	18.543	28.8656	16.6721	21.9375	40.0519	7.54611
hsa_retrom35644 + ENSG00000147224	18.543	28.8656	16.6721	21.9375	40.0519	36.5178
ENSGALG00000016430	28.0625	23.9578	295.244	49.9372	88.6045	76.2156
ENSG00000131828	47.2271	39.2008	318.255	192.766	107.401	15.8217
hsa_retrop31666 + ENSG00000131828	47.2271	39.2008	318.255	192.766	107.401	68.087
ENSGALG00000007574	20.7925	15.5803	40.2514	20.8746	19.3292	16.7258
ENSG00000083750	12.2078	8.43655	5.98981	9.36176	3.97373	6.37125
hsa_retrop40672 + ENSG00000083750	69.8647	55.7895	44.3095	48.9043	42.3732	34.6302
ENSGALG00000004187	8.55485	9.46198	19.9785	16.0384	20.1495	12.3788
ENSG00000187325	12.1702	11.8845	12.3376	8.14696	5.94369	4.1561
hsa_retrom31396 + ENSG00000187325	42.9626	38.723	37.9126	28.4573	35.4621	59.313
ENSGALG00000016578	19.7158	16.3716	14.4868	11.2905	14.8255	27.8408
ENSG00000196459	7.16067	14.005	3.98591	5.35954	6.72567	5.69018
hsa_retrop21106 + ENSG00000196459	10.8675	18.154	10.2253	10.2243	9.70253	11.8868
ENSGALG00000008092	8.80346	6.41677	6.4131	12.1367	9.15381	41.3172
ENSG00000101888	1.24302	1.02717	0.991691	2.85326	5.66553	8.52093
hsa_retrop25503 + ENSG00000101888	4.17594	4.45974	6.53779	9.2738	13.139	17.6511
ENSGALG00000006108	84.6782	70.8346	23.0773	33.2544	27.4072	10.224
ENSG00000156504	18.0124	13.9846	7.40381	6.14105	4.87979	13.0054
hsa_retrop41275 + ENSG00000156504	25.5813	24.2219	18.9676	13.8016	11.0596	18.0125
ENSGALG00000024039	11.0794	10.9887	9.99246	12.3995	10.3788	31.0132
ENSG00000156697	2.79466	1.72471	2.1416	2.52746	3.2436	1.00482
hsa_retrop11436 + ENSG00000156697	6.42844	5.76452	4.49273	6.90778	8.95217	2.72444
ENSGALG00000008652	11.2094	7.87443	13.4819	13.4362	13.5695	11.6674
ENSG00000018610	9.0021	7.31208	7.64954	11.0724	5.96127	4.704
hsa_retrom37791 + ENSG00000018610	10.2988	8.45489	8.26976	11.9584	5.96127	7.75515

## Sheet: Chimpanzee
# Supplemental Table S9: dosage compensation of chimpanzee out of X retrogenes
# Each group contains the the expression values (measured in FPKM) for: a) the parental gene ortholog in chicken; b) the parental gene (on the X chr); c) the expression of the parental gene + that of its derived autosomal retrogene
# Only cases in which the parental X-linked gene had an annotated Ensembl (rel. 65) ortholog in chicken could be analysed
	Brain	Cerebellum	Heart	Kidney	Liver	Testis
ENSGALG00000007510	19.3434	7.84051	8.48884	3.4231	4.17605	27.3326
ENSPTRG00000022389	38.138	18.4952	32.9049	50.536	27.1009	23.779
ptr_retrom02757 + ENSPTRG00000022389	38.138	18.4952	32.905	50.536	27.1009	383.48
ENSGALG00000007936	158.769	129.871	129.498	257.327	321.139	92.9929
ENSPTRG00000022052	227.58	166.317	346.335	211.845	236.973	30.731
ptr_retrom08390 + ENSPTRG00000022052	227.58	166.317	346.335	211.845	236.973	440.294
ENSGALG00000024039	11.0794	10.9887	9.99246	12.3995	10.3788	31.0132
ENSPTRG00000022262	3.63783	3.32294	2.98125	2.85843	4.33958	0.440053
ptr_retrop04117 + ENSPTRG00000022262	7.26714	7.85192	7.72568	8.76251	11.0304	2.24154
ENSGALG00000004025	13.4537	14.6693	17.3879	14.7267	24.7436	27.2766
ENSPTRG00000022269	10.4555	8.90794	11.0544	9.20474	11.0749	2.41495
ptr_retrop08718 + ENSPTRG00000022269	10.4555	9.28479	11.643	9.20474	11.0749	11.0446
ENSGALG00000004187	8.55485	9.46198	19.9785	16.0384	20.1495	12.3788
ENSPTRG00000022053	13.7057	10.6159	17.2773	10.1601	5.40035	4.36213
ptr_retrop02341 + ENSPTRG00000022053	15.4724	11.3987	17.2773	10.5293	5.40035	4.64995
ENSGALG00000004856	10.6649	7.93272	8.7573	7.98604	8.38127	23.8635
ENSPTRG00000023739	1e-06	0.248719	2.05138	2.41384	2.04386	3.28036
ptr_retrom02589 + ENSPTRG00000023739	10.7332	15.4096	12.3588	12.3414	13.7508	24.8748
ENSGALG00000006906	18.518	13.1967	6.47264	4.43696	4.29631	3.11545
ENSPTRG00000022071	3.92816	6.88692	3.75338	3.89151	2.45209	0.711072
ptr_retrom10757 + ENSPTRG00000022071	6.10018	8.68414	8.67216	5.81432	3.88758	5.33757
ENSGALG00000004908	52.0036	35.4901	50.6181	37.211	14.1345	43.2902
ENSPTRG00000022163	28.6885	44.2235	28.2095	19.4726	48.6182	12.5796
ptr_retrom07363 + ENSPTRG00000022163	28.6885	44.2235	28.2095	19.4726	48.6182	111.398
ENSGALG000000041871	8.55485	9.46198	19.9785	16.0384	20.1495	12.3788
ENSPTRG000000220531	13.7057	10.6159	17.2773	10.1601	5.40035	4.36213
ptr_retrop08743 + ENSPTRG000000220531	49.4983	32.177	48.4852	31.3127	38.8829	194.262

## Sheet: Gorilla
# Supplemental Table S9: dosage compensation of gorilla out of X retrogenes
# Each group contains the the expression values (measured in FPKM + 1E-06) for: a) the parental gene ortholog in chicken; b) the parental gene (on the X chr); c) the expression of the parental gene + that of its derived autosomal retrogene
# Only cases in which the parental X-linked gene had an annotated Ensembl (rel. 65) ortholog in chicken could be analysed
	Brain	Cerebellum	Heart	Kidney	Liver	Testis
ENSGALG00000007510	19.3434	7.84051	8.48884	3.4231	4.17605	27.3326
ENSGGOG00000011378	42.8027	34.4839	37.1764	100.253	53.7393	26.6153
ggo_retrop00487 + ENSGGOG00000011378	42.8027	34.4839	37.1764	100.253	53.7393	320.921
ENSGALG00000008092	8.80346	6.41677	6.4131	12.1367	9.15381	41.3172
ENSGGOG00000013593	1.12105	0.95145	0.375007	2.02046	2.64409	7.67289
ggo_retrop00417 + ENSGGOG00000013593	3.84473	5.28073	6.78529	7.81642	12.6885	13.9185
ENSGALG00000016430	28.0625	23.9578	295.244	49.9372	88.6045	76.2156
ENSGGOG00000013574	46.7921	32.8535	231.591	58.4184	42.5875	8.79788
ggo_retrop04303 + ENSGGOG00000013574	46.7921	32.8535	231.591	58.4184	42.5875	91.7679
ENSGALG00000004187	8.55485	9.46198	19.9785	16.0384	20.1495	12.3788
ENSGGOG00000002470	12.5723	8.48675	6.18637	8.68807	8.74802	6.56953
ggo_retrop01096 + ENSGGOG00000002470	17.2549	12.1392	7.61482	10.723	14.4529	15.9228
ENSGALG000000041871	8.55485	9.46198	19.9785	16.0384	20.1495	12.3788
ENSGGOG000000024701	12.5723	8.48675	6.18637	8.68807	8.74802	6.56953
ggo_retrop00444 + ENSGGOG000000024701	23.2723	16.8507	13.7142	17.8659	21.0114	46.7596
ENSGALG00000016285	7.41569	4.62376	25.5033	53.8587	82.4708	207.091
ENSGGOG00000006761	1.75767	1.82989	4.59115	13.2215	9.38287	5.01821
ggo_retrom04369 + ENSGGOG00000006761	1.82218	1.82989	4.97844	13.2215	9.38287	10.0497
ENSGALG00000006108	84.6782	70.8346	23.0773	33.2544	27.4072	10.224
ENSGGOG00000025221	15.1898	8.47373	7.01446	9.53564	7.23601	12.9753
ggo_retrop01506 + ENSGGOG00000025221	20.9661	17.4036	13.2471	14.3962	14.6118	17.9891
ENSGALG00000007936	158.769	129.871	129.498	257.327	321.139	92.9929
ENSGGOG00000017111	148.651	105.965	282.389	128.703	68.1406	39.9861
ggo_retrom03775 + ENSGGOG00000017111	148.651	105.965	282.389	128.703	68.1406	96.6858
ENSGALG000000162851	7.41569	4.62376	25.5033	53.8587	82.4708	207.091
ENSGGOG000000067611	1.75767	1.82989	4.59115	13.2215	9.38287	5.01821
ggo_retrom04277 + ENSGGOG000000067611	1.75767	1.82989	4.59115	13.2215	9.38287	66.5419
ENSGALG00000024039	11.0794	10.9887	9.99246	12.3995	10.3788	31.0132
ENSGGOG00000014930	3.47914	3.12285	3.96181	3.46815	2.81112	0.527951
ggo_retrop01212 + ENSGGOG00000014930	8.18916	8.81876	9.02842	9.85946	7.83101	3.16195
ENSGALG00000007574	20.7925	15.5803	40.2514	20.8746	19.3292	16.7258
ENSGGOG00000011501	9.43342	7.59455	5.93667	7.67789	5.92437	4.5035
ggo_retrop01440 + ENSGGOG00000011501	79.1987	60.0696	55.318	50.9194	52.1663	32.1439
ENSGALG00000009139	25.2969	25.9935	25.2516	18.9269	15.5023	16.602
ENSGGOG00000024268	3.43928	2.8188	6.03128	3.16471	2.401	4.65101
ggo_retrom01743 + ENSGGOG00000024268	6.95826	6.21727	13.4592	7.73588	6.73245	7.61497
ENSGALG00000004856	10.6649	7.93272	8.7573	7.98604	8.38127	23.8635
ENSGGOG00000034932	0.364482	0.383502	1e-06	9.20385	2.80632	5.70529
ggo_retrom00307 + ENSGGOG00000034932	8.89362	11.6153	14.7573	18.9268	31.5386	31.3046
ENSGALG00000006906	18.518	13.1967	6.47264	4.43696	4.29631	3.11545
ENSGGOG00000022912	4.60946	3.93948	1.87546	2.78229	1.29954	1.1052
ggo_retrom04828 + ENSGGOG00000022912	8.16358	4.91992	2.61516	4.29863	3.12383	3.02393

## Sheet: Orangutan
# Supplemental Table S9: dosage compensation of orangutan out of X retrogenes
# Each group contains the the expression values (measured in FPKM) for: a) the parental gene ortholog in chicken; b) the parental gene (on the X chr); c) the expression of the parental gene + that of its derived autosomal retrogene
# Only cases in which the parental X-linked gene had an annotated Ensembl (rel. 65) ortholog in chicken could be analysed
	Brain	Cerebellum	Heart	Kidney	Liver	Testis
ENSGALG00000016285	7.41569	4.62376	25.5033	53.8587	82.4708	207.091
ENSPPYG00000020218	1.68163	1.70926	4.67675	12.8844	20.3351	1.88161
ppy_retrom16166 + ENSPPYG00000020218	1.68163	1.70926	4.67675	12.8844	20.3351	20.7201
ENSGALG00000006906	18.518	13.1967	6.47264	4.43696	4.29631	3.11545
ENSPPYG00000020520	6.38799	4.69399	3.51748	3.47933	2.47967	0.301116
ppy_retrop18366 + ENSPPYG00000020520	9.90531	5.56457	7.45728	5.09383	4.76398	6.09845
ENSGALG00000007936	158.769	129.871	129.498	257.327	321.139	92.9929
ENSPPYG00000020496	198.465	141.554	244.555	188.858	162.055	43.7953
ppy_retrom15061 + ENSPPYG00000020496	198.465	141.554	244.555	188.858	162.055	94.1249
ENSGALG00000016430	28.0625	23.9578	295.244	49.9372	88.6045	76.2156
ENSPPYG00000020171	137.247	69.9883	612.238	116.729	148.661	12.3786
ppy_retrop17472 + ENSPPYG00000020171	137.247	69.9883	612.238	116.729	148.661	24.3583
ENSGALG00000004187	8.55485	9.46198	19.9785	16.0384	20.1495	12.3788
ENSPPYG00000020497	6.74516	8.07454	11.0271	5.28994	4.89635	6.96107
ppy_retrom15638 + ENSPPYG00000020497	39.7146	27.0302	39.891	23.8074	45.2445	27.5567
ENSGALG00000004908	52.0036	35.4901	50.6181	37.211	14.1345	43.2902
ENSPPYG00000020612	43.6941	27.7259	26.7425	21.5406	25.1981	17.0097
ppy_retrop14458 + ENSPPYG00000020612	43.6941	27.726	26.7425	21.5406	25.1981	23.3682
ENSGALG00000007510	19.3434	7.84051	8.48884	3.4231	4.17605	27.3326
ENSPPYG00000020833	50.4694	23.499	28.608	101.456	44.0732	29.6803
ppy_retrom06949 + ENSPPYG00000020833	50.4694	23.499	28.608	101.456	44.0732	76.8538
ENSGALG00000006760	12.058	9.32364	8.50015	9.41133	9.78951	13.241
ENSPPYG00000020541	3.91502	4.1065	3.22936	3.92218	3.63989	12.6419
ppy_retrop10678 + ENSPPYG00000020541	17.4815	15.6636	20.7266	17.0355	14.4436	22.5169
ENSGALG00000006457	35.7413	32.911	29.3611	18.3112	24.2285	49.0956
ENSPPYG00000020771	22.7914	21.8988	40.4	26.871	22.7107	37.0779
ppy_retrop19059 + ENSPPYG00000020771	25.2297	26.219	47.5571	29.9354	27.5094	39.276

## Sheet: Macaque
# Supplemental Table S9: dosage compensation of macaque out of X retrogenes
# Each group contains the the expression values (measured in FPKM) for: a) the parental gene ortholog in chicken; b) the parental gene (on the X chr); c) the expression of the parental gene + that of its derived autosomal retrogene
# Only cases in which the parental X-linked gene had an annotated Ensembl (rel. 65) ortholog in chicken could be analysed
	Brain	Cerebellum	Heart	Kidney	Liver	Testis
ENSGALG00000006906	18.518	13.1967	6.47264	4.43696	4.29631	3.11545
ENSMMUG00000016776	5.90338	5.4728	2.84451	4.36031	1.56444	0.563434
mmu_retrop40387 + ENSMMUG00000016776	11.4145	6.17146	3.39794	4.96434	1.56444	2.11309
ENSGALG00000008092	8.80346	6.41677	6.4131	12.1367	9.15381	41.3172
ENSMMUG00000013204	3.53429	2.92062	2.16772	6.37505	7.24781	7.22586
mmu_retrop10339 + ENSMMUG00000013204	4.83207	4.88982	4.94284	9.87254	10.3052	9.9377
ENSGALG00000004187	8.55485	9.46198	19.9785	16.0384	20.1495	12.3788
ENSMMUG00000012875	7.65829	7.525	16.2686	9.68076	6.0477	2.88231
mmu_retrom30456 + ENSMMUG00000012875	32.1746	26.954	38.3368	35.9715	43.2789	88.0362
ENSGALG00000004025	13.4537	14.6693	17.3879	14.7267	24.7436	27.2766
ENSMMUG00000008389	3.84063	5.11107	4.63641	3.52647	3.73183	1.19106
mmu_retrom30567 + ENSMMUG00000008389	3.84063	5.11107	4.63642	3.52647	3.73183	4.93828
ENSGALG00000009000	3.09507	3.33145	0.885905	30.1457	65.0058	36.1764
ENSMMUG00000021412	3.02553	2.0311	1.51239	10.3773	71.9776	0.064911
mmu_retrom35574 + ENSMMUG00000021412	3.02553	2.5834	1.51239	10.3773	71.9776	82.2911
ENSGALG00000007574	20.7925	15.5803	40.2514	20.8746	19.3292	16.7258
ENSMMUG00000017635	12.0804	7.60956	8.84215	6.54311	4.57167	2.90641
mmu_retrom11625 + ENSMMUG00000017635	54.0237	42.7734	42.8118	36.1603	30.8662	20.6077
ENSGALG00000024039	11.0794	10.9887	9.99246	12.3995	10.3788	31.0132
ENSMMUG00000020700	2.10391	2.66357	3.4952	2.2673	1.54439	0.247324
mmu_retrop09478 + ENSMMUG00000020700	9.01914	11.1596	8.58301	10.0249	9.44484	2.05665
ENSGALG00000009139	25.2969	25.9935	25.2516	18.9269	15.5023	16.602
ENSMMUG00000002888	7.83123	8.09839	14.4235	6.82933	4.27795	4.37101
mmu_retrom20589 + ENSMMUG00000002888	10.7753	10.5113	19.5516	10.4091	6.8033	12.1257
ENSGALG00000016430	28.0625	23.9578	295.244	49.9372	88.6045	76.2156
ENSMMUG00000017336	32.2115	28.2156	146.34	40.3511	71.4923	3.59031
mmu_retrop33230 + ENSMMUG00000017336	32.2115	28.2156	146.34	40.3511	71.4923	121.432
ENSGALG00000016578	19.7158	16.3716	14.4868	11.2905	14.8255	27.8408
ENSMMUG00000022619	6.21682	12.8589	8.04465	5.64068	7.66366	3.10335
mmu_retrop06436 + ENSMMUG00000022619	17.1812	27.6961	20.8943	16.4823	26.6971	102.423
ENSGALG00000016285	7.41569	4.62376	25.5033	53.8587	82.4708	207.091
ENSMMUG00000005959	3.90221	2.86949	4.1534	37.7336	24.4726	9.70744
mmu_retrop32951 + ENSMMUG00000005959	3.90221	2.86949	4.1534	37.7336	24.4726	109.297
ENSGALG000000162851	7.41569	4.62376	25.5033	53.8587	82.4708	207.091
ENSMMUG000000059591	3.90221	2.86949	4.1534	37.7336	24.4726	9.70744
mmu_retrom32458 + ENSMMUG000000059591	4.15539	3.22119	4.1534	42.6764	27.585	54.2709
ENSGALG00000006760	12.058	9.32364	8.50015	9.41133	9.78951	13.241
ENSMMUG00000013008	3.34637	4.93311	2.15048	3.17185	1.71252	8.14603
mmu_retrop17063 + ENSMMUG00000013008	11.7223	11.8844	10.9794	9.59905	8.68355	17.4316
ENSGALG00000004908	52.0036	35.4901	50.6181	37.211	14.1345	43.2902
ENSMMUG00000004674	25.4587	21.4069	19.0218	11.2544	13.6248	4.22666
mmu_retrop36767 + ENSMMUG00000004674	25.4587	21.4069	19.0218	11.2544	13.6248	76.4532
ENSGALG00000007510	19.3434	7.84051	8.48884	3.4231	4.17605	27.3326
ENSMMUG00000020743	50.3696	25.3492	40.0613	66.2024	33.851	17.5317
mmu_retrom05467 + ENSMMUG00000020743	50.3696	25.3492	40.0613	66.2024	33.851	468.428
ENSGALG00000006127	25.7699	22.65	6.89609	12.8865	12.052	10.2606
ENSMMUG00000006724	1e-06	1e-06	1e-06	1e-06	1e-06	19.5071
mmu_retrop13721 + ENSMMUG00000006724	8.7284	8.67227	10.288	7.16566	9.03557	31.6204
ENSGALG00000016576	1.35973	1.24969	1.76539	2.67118	2.444	9.27012
ENSMMUG00000019410	3.51325	4.5304	4.88114	5.72285	3.86279	6.1243
mmu_retrop30637 + ENSMMUG00000019410	3.51325	4.5304	4.88114	5.72285	3.86279	9.45051
ENSGALG00000007936	158.769	129.871	129.498	257.327	321.139	92.9929
ENSMMUG00000012874	137.824	92.2765	152.702	131.252	129.077	9.53285
mmu_retrom25906 + ENSMMUG00000012874	137.824	92.2765	152.702	131.252	129.077	371.838
ENSGALG00000004856	10.6649	7.93272	8.7573	7.98604	8.38127	23.8635
ENSMMUG00000012711	0.0245068	0.793089	4.13591	11.4294	1.23122	12.6825
mmu_retrom04453 + ENSMMUG00000012711	6.519	7.10501	10.8474	15.2397	20.3775	27.6995

## Sheet: Mouse
# Supplemental Table S9: dosage compensation of mouse out of X retrogenes
# Each group contains the the expression values (measured in FPKM) for: a) the parental gene ortholog in chicken; b) the parental gene (on the X chr); c) the expression of the parental gene + that of its derived autosomal retrogene
# Only cases in which the parental X-linked gene had an annotated Ensembl (rel. 65) ortholog in chicken could be analysed
	Brain	Cerebellum	Heart	Kidney	Liver	Testis
ENSGALG00000004195	0.83459	0.594937	0.475234	0.752049	0.283798	30.5039
ENSMUSG00000034311	0.234315	0.151849	0.161902	0.159434	0.0880458	1.29667
mus_retrop54426 + ENSMUSG00000034311	0.234316	0.15185	0.161903	0.159435	0.0880468	6.03484
ENSGALG00000016231	126.59	164.818	210.697	270.82	161.933	115.078
ENSMUSG00000000787	36.1419	49.6534	47.3889	60.3438	64.1621	7.95632
mus_retrop114705 + ENSMUSG00000000787	36.1419	49.6534	47.3889	60.3438	64.1621	100.004
ENSGALG00000006851	14.6001	11.4605	1e-06	3.06166	1e-06	0.63463
ENSMUSG00000034755	2.7392	1.92729	0.0573409	0.0201982	1e-06	0.0535522
mus_retrom68722 + ENSMUSG00000034755	20.3533	21.08	0.315962	0.0201992	2e-06	0.0535532
ENSGALG00000016285	7.41569	4.62376	25.5033	53.8587	82.4708	207.091
ENSMUSG00000025059	4.47626	4.48839	9.91167	129.965	36.2487	0.557249
mus_retrom96895 + ENSMUSG00000025059	4.47627	4.48839	9.91167	129.965	36.2487	249.435
ENSGALG00000004908	52.0036	35.4901	50.6181	37.211	14.1345	43.2902
ENSMUSG00000031432	25.8135	20.2141	17.1789	15.0285	19.9294	5.67653
mus_retrop53855 + ENSMUSG00000031432	25.8135	20.2141	17.1789	15.0285	19.9294	106.519
ENSGALG00000016552	9.76631	10.1908	11.9967	11.4806	8.79229	20.7413
ENSMUSG00000031370	15.2847	10.2379	5.58195	6.69069	5.07902	5.80077
mus_retrop55007 + ENSMUSG00000031370	32.6246	30.8607	14.2466	15.3452	15.1326	9.49874
ENSGALG000000049081	52.0036	35.4901	50.6181	37.211	14.1345	43.2902
ENSMUSG000000314321	25.8135	20.2141	17.1789	15.0285	19.9294	5.67653
mus_retrop53990 + ENSMUSG000000314321	28.9284	26.0265	23.6556	27.0099	39.1185	12.835
ENSGALG00000006457	35.7413	32.911	29.3611	18.3112	24.2285	49.0956
ENSMUSG00000031134	19.425	19.8927	17.1572	16.9208	7.71219	2.7602
mus_retrop89795 + ENSMUSG00000031134	19.425	19.8927	17.1572	16.9208	7.71219	20.531
ENSGALG000000064571	35.7413	32.911	29.3611	18.3112	24.2285	49.0956
ENSMUSG000000311341	19.425	19.8927	17.1572	16.9208	7.71219	2.7602
mus_retrom72520 + ENSMUSG000000311341	23.2633	22.9377	19.3838	18.8852	10.1408	5.36652
ENSGALG00000006906	18.518	13.1967	6.47264	4.43696	4.29631	3.11545
ENSMUSG00000025531	7.15271	5.41014	4.08911	4.17686	3.55327	0.332845
mus_retrom125011 + ENSMUSG00000025531	8.68639	7.1858	6.3795	5.29172	3.94963	2.18465
ENSGALG00000006162	14.3236	16.8072	17.2602	15.3254	13.7452	6.54238
ENSMUSG00000061273	8.88788	10.9168	15.4142	16.5356	10.1121	0.518913
mus_retrop56772 + ENSMUSG00000061273	15.244	14.6206	19.1755	23.6028	11.3732	2.20311
ENSGALG00000004086	23.1529	22.2397	31.4976	32.237	30.6682	26.2896
ENSMUSG00000031242	8.35159	8.05802	3.69939	3.87373	6.09206	0.76823
mus_retrop46040 + ENSMUSG00000031242	17.2252	15.584	17.4104	19.2704	20.8852	27.0537
ENSGALG00000016430	28.0625	23.9578	295.244	49.9372	88.6045	76.2156
ENSMUSG00000031299	54.9215	51.5874	443.546	147.249	59.7138	2.0854
mus_retrom102170 + ENSMUSG00000031299	54.9215	51.5874	443.546	147.249	59.7138	114.588
ENSGALG000000162851	7.41569	4.62376	25.5033	53.8587	82.4708	207.091
ENSMUSG000000250591	4.47626	4.48839	9.91167	129.965	36.2487	0.557249
mus_retrop45870 + ENSMUSG000000250591	4.47627	4.48839	9.91167	129.965	36.2487	269.402
ENSGALG00000007510	19.3434	7.84051	8.48884	3.4231	4.17605	27.3326
ENSMUSG00000031347	17.7708	12.6219	14.8884	24.0103	12.8714	12.703
mus_retrom41057 + ENSMUSG00000031347	17.7708	12.6219	14.8884	24.0103	12.8714	1018.57
ENSGALG00000007936	158.769	129.871	129.498	257.327	321.139	92.9929
ENSMUSG00000062070	107.859	94.9807	146.986	165.329	150.711	5.94617
mus_retrom43546 + ENSMUSG00000062070	107.859	94.9807	146.986	165.329	150.711	511.637
ENSGALG00000004187	8.55485	9.46198	19.9785	16.0384	20.1495	12.3788
ENSMUSG00000047242	9.2339	6.89858	5.72896	6.28989	0.386658	6.37723
mus_retrop52885 + ENSMUSG00000047242	24.2476	17.8646	19.0156	16.8645	11.6732	220.975
ENSGALG00000016578	19.7158	16.3716	14.4868	11.2905	14.8255	27.8408
ENSMUSG00000079317	20.2187	16.0651	11.3694	5.00202	4.92187	1.2131
mus_retrom59282 + ENSMUSG00000079317	27.7309	22.2874	21.2683	20.0366	14.5867	16.9661
ENSGALG00000008092	8.80346	6.41677	6.4131	12.1367	9.15381	41.3172
ENSMUSG00000042271	9.44547	12.9678	3.62085	19.4271	10.2909	1.4231
mus_retrop112192 + ENSMUSG00000042271	13.419	16.6477	7.58022	24.7125	18.2345	74.3198
ENSGALG00000008507	8.61787	13.4491	11.6986	12.7431	14.1962	32.5396
ENSMUSG00000037475	7.15862	8.44007	8.35618	9.10377	7.19624	4.92593
mus_retrop92527 + ENSMUSG00000037475	8.47847	10.567	9.55506	12.1081	9.15478	8.72096
ENSGALG00000006190	2.10608	1.9796	32.0207	0.861105	3.20702	0.7165
ENSMUSG00000023092	33.1946	33.2944	66.0246	66.7389	4.26227	4.95378
mus_retrom69830 + ENSMUSG00000023092	33.576	33.2944	66.2369	66.7389	4.71279	938.57
ENSGALG00000009139	25.2969	25.9935	25.2516	18.9269	15.5023	16.602
ENSMUSG00000073139	13.8663	15.4793	11.7175	12.3747	15.0749	7.33484
mus_retrop114001 + ENSMUSG00000073139	16.0359	17.2139	14.5438	17.1513	17.7894	10.5374
ENSGALG00000008517	18.0405	10.5254	18.0329	8.85202	11.9752	12.3279
ENSMUSG00000000355	30.4874	21.7014	20.8174	24.0463	35.1644	2.29361
mus_retrop112296 + ENSMUSG00000000355	39.7149	29.8029	28.9222	33.1674	41.5427	43.6665
ENSGALG00000006497	1.21982	17.2237	1e-06	1e-06	1e-06	1e-06
ENSMUSG00000067860	1.14789	2.57455	1e-06	1e-06	1e-06	1.0497
mus_retrop56403 + ENSMUSG00000067860	1.14789	2.57455	2e-06	2e-06	2e-06	2.5686

## Sheet: Rat
# Supplemental Table S9: dosage compensation of rat out of X retrogenes
# Each group contains the the expression values (measured in FPKM) for: a) the parental gene ortholog in chicken; b) the parental gene (on the X chr); c) the expression of the parental gene + that of its derived autosomal retrogene
# Only cases in which the parental X-linked gene had an annotated Ensembl (rel. 65) ortholog in chicken could be analysed
	Brain	Cerebellum	Heart	Kidney	Liver	Testis
ENSGALG00000006906	18.518	13.1967	6.47264	4.43696	4.29631	3.11545
ENSRNOG00000000161	4.63526	3.50515	1.93927	2.05606	1.19197	0.727997
rno_retrom02258 + ENSRNOG00000000161	5.88257	5.17908	2.42079	2.63929	1.19197	2.63651
ENSGALG00000004086	23.1529	22.2397	31.4976	32.237	30.6682	26.2896
ENSRNOG00000002323	5.86481	4.48357	3.50388	2.47715	3.2914	1.73029
rno_retrop00678 + ENSRNOG00000002323	12.5978	10.585	7.47936	9.73256	8.69411	13.9136
ENSGALG00000016578	19.7158	16.3716	14.4868	11.2905	14.8255	27.8408
ENSRNOG00000042276	24.0052	18.8535	4.00244	3.18399	2.3413	4.0814
rno_retrom01825 + ENSRNOG00000042276	40.701	41.9278	26.2594	57.9712	57.203	44.0651
ENSGALG00000020330	14.1583	13.9898	12.1985	11.3314	13.1229	16.6647
ENSRNOG00000026267	32.7538	26.08	45.4551	56.1858	69.7357	2.13029
rno_retrom06078 + ENSRNOG00000026267	33.6961	26.08	45.4551	56.1858	69.7357	15.5927
ENSGALG00000006457	35.7413	32.911	29.3611	18.3112	24.2285	49.0956
ENSRNOG00000000866	10.7039	9.25543	7.38446	7.78101	8.53142	2.35028
rno_retrop00448 + ENSRNOG00000000866	25.426	22.0725	17.864	17.4828	20.8873	10.5065
ENSGALG00000006162	14.3236	16.8072	17.2602	15.3254	13.7452	6.54238
ENSRNOG00000000881	5.13838	6.14814	4.0423	5.33824	3.67383	0.144028
rno_retrop01833 + ENSRNOG00000000881	6.66347	7.3204	6.04442	6.13692	4.10469	0.520488
ENSGALG00000016430	28.0625	23.9578	295.244	49.9372	88.6045	76.2156
ENSRNOG00000025383	66.1616	52.1752	334.06	165.879	37.6084	2.90693
rno_retrom06531 + ENSRNOG00000025383	66.1616	52.1752	334.06	165.879	37.6084	46.1555
ENSGALG00000009139	25.2969	25.9935	25.2516	18.9269	15.5023	16.602
ENSRNOG00000011047	6.36633	6.72365	8.64358	10.4399	13.9924	3.98839
rno_retrop02069 + ENSRNOG00000011047	10.9366	10.5434	15.3065	18.5055	16.8113	6.10702
ENSGALG00000020262	10.6712	10.2962	9.19958	10.2132	10.7428	17.2395
ENSRNOG00000031169	9.53243	12.2776	23.4604	12.0266	11.6176	5.34018
rno_retrop01208 + ENSRNOG00000031169	9.53243	12.2776	23.4604	12.0266	11.6176	20.9271
ENSGALG00000007936	158.769	129.871	129.498	257.327	321.139	92.9929
ENSRNOG00000002467	186.821	144.905	561.457	327.279	381.135	9.27773
rno_retrop02493 + ENSRNOG00000002467	186.821	144.905	561.457	327.279	381.135	471.382
ENSGALG00000016285	7.41569	4.62376	25.5033	53.8587	82.4708	207.091
ENSRNOG00000034116	2.49599	2.7238	3.35078	28.9112	55.8649	0.508193
rno_retrop00645 + ENSRNOG00000034116	2.49599	2.7238	3.35078	28.9112	55.8649	125.947
ENSGALG00000007510	19.3434	7.84051	8.48884	3.4231	4.17605	27.3326
ENSRNOG00000017059	62.8831	52.5488	49.0907	50.5189	120.869	3.74764
rno_retrom00516 + ENSRNOG00000017059	63.0016	52.5488	49.0907	50.5189	120.869	296.489
ENSGALG00000016231	126.59	164.818	210.697	270.82	161.933	115.078
ENSRNOG00000023383	22.5567	24.4771	14.1149	21.7223	26.5423	10.0687
rno_retrop02235 + ENSRNOG00000023383	22.6044	24.5619	14.1149	21.7223	26.5423	98.7913

## Sheet: Opossum
# Supplemental Table S9: dosage compensation of opossum out of X retrogenes
# Each group contains the the expression values (measured in FPKM) for: a) the parental gene ortholog in chicken; b) the parental gene (on the X chr); c) the expression of the parental gene + that of its derived autosomal retrogene
# Only cases in which the parental X-linked gene had an annotated Ensembl (rel. 65) ortholog in chicken could be analysed
	Brain	Cerebellum	Heart	Kidney	Liver	Testis
ENSGALG00000009000	3.09507	3.33145	0.885905	30.1457	65.0058	36.1764
ENSMODG00000002362	6.98733	2.33262	18.0596	20.565	37.9135	5.34509
mdo_retrom12226 + ENSMODG00000002362	6.98733	3.92728	18.0596	20.565	37.9135	125.542
ENSGALG00000008517	18.0405	10.5254	18.0329	8.85202	11.9752	12.3279
ENSMODG00000010354	1e-06	1e-06	0.31772	1e-06	1e-06	3.40147
mdo_retrom08205 + ENSMODG00000010354	7.16777	11.4703	18.9666	18.5824	18.8927	12.85
ENSGALG00000007936	158.769	129.871	129.498	257.327	321.139	92.9929
ENSMODG00000004055	123.788	134.516	135.937	134.773	127.806	5.16109
mdo_retrom24755 + ENSMODG00000004055	124.348	134.755	136.309	134.773	128.318	144.698
ENSGALG00000006410	10.9185	8.99341	9.25787	6.16084	8.03145	4.26631
ENSMODG00000014087	0.0234293	0.122448	0.0731447	1.3701	4.51097	0.620514
mdo_retrom29792 + ENSMODG00000014087	8.63392	7.70708	5.88639	6.03228	10.0491	1.62511
ENSGALG00000006906	18.518	13.1967	6.47264	4.43696	4.29631	3.11545
ENSMODG00000014364	0.741507	1.11672	2.10146	2.04433	1.8792	0.792451
mdo_retrom03906 + ENSMODG00000014364	2.63192	2.97361	3.83141	3.28921	3.37036	1.47574
ENSGALG00000004999	24.365	9.71833	10.8129	11.3895	11.6298	6.35506
ENSMODG00000011691	18.9078	15.7887	2.42524	4.62944	2.71343	3.69726
mdo_retrom25029 + ENSMODG00000011691	43.89	29.5475	16.6315	20.6267	14.6183	169.636
ENSGALG00000008559	12.301	9.8711	8.5351	7.61552	7.71539	29.1057
ENSMODG00000010345	11.7453	6.72246	5.51798	7.13713	7.85119	18.9561
mdo_retrop25519 + ENSMODG00000010345	11.8716	6.72246	5.51798	7.13713	7.85119	37.8082
ENSGALG00000006457	35.7413	32.911	29.3611	18.3112	24.2285	49.0956
ENSMODG00000014054	22.6944	45.7201	37.8267	32.5504	33.6068	9.21665
mdo_retrop13185 + ENSMODG00000014054	22.6944	45.7201	37.8267	32.5504	33.6068	19.3666
