# Supplementary material for: The life history of retrocopies illuminates the evolution of new mammalian genes
Source: HighWire-hosted journal article supplement (doi:10.1101/gr.198473.115), 2016-01-04
Supplement: Supplemental_Tables.zip [file Supplemental_Table_S10.xlsx]

## Sheet: out_of_X
# Supplemental Table 10: dN/dS for out-of-X retrogenes
# dN/dS ratios are computed on the retrogene branchby comparing the retrocopy and the ancestral sequence of the retrocopy at the time of the retroposition
# The analysis was performed using the codeml program from the PAML package and the orthologous parental sequence in mouse (for primate retrogenes), or in human (for other species)
# For all primates, we considered only retrogenes from primate-specific or eutherian-specific retrogene families (Supp. Table S6)
# For all rodents, we considered only retrogenes from rodent-specific or eutherian-specific retrogene families (Supp. Table S6)
# For opossum, we considered only retrogenes from marsupial-specific retrogene families (Supp. Table S6)
human_retro	dNdS
hsa_retrom03629	0.23785
hsa_retrom04584	0.22176
hsa_retrop06597	0.05605
hsa_retrop11436	0.84701
hsa_retrom11235	0.05275
hsa_retrop16833	0.02902
hsa_retrom20014	0.01275
hsa_retrop21106	0.0001
hsa_retrom24471	0.04644
hsa_retrop25503	0.10399
hsa_retrop25534	0.09483
hsa_retrom29895	0.11016
hsa_retrom29909	0.22526
hsa_retrop31666	0.18122
hsa_retrom30469	0.24567
hsa_retrom30504	0.1397
hsa_retrop32622	0.51107
hsa_retrom31396	0.14623
hsa_retrom31563	2.05998
hsa_retrom32073	0.16969
hsa_retrom34525	0.12742
hsa_retrom35644	0.1816
hsairetrop37208	40.0778
hsa_retrop40672	0.00527
hsa_retrom39281	0.06604
hsa_retrop41275	0.11118
chimpanzee_retro	dNdS
ptr_retrom10757	0.23883
ptriretrom18906	0.21932
ptriretrop16360	0.0467
ptr_retrop04117	0.55261
ptriretrom12424	0.04973
ptr_retrom02757	0.02534
ptr_retrop02476	0.0001
ptr_retrop02029	0.09407
ptriretrom41121	0.04836
ptriretrop34565	0.22286
ptr_retrop09625	0.10206
ptr_retrop09685	0.18823
ptriretrom34871	0.25136
ptriretrom34902	0.20314
ptr_retrop08718	1.1993
ptr_retrop08743	0.13998
ptr_retrom08879	0.59981
ptriretrom32891	0.0001
ptr_retrom08390	0.13862
ptr_retrom07363	0.15262
ptriretrop24479	999
gorilla_retro	dNdS
ggo_retrom04828	0.2312
ggo_retrop01212	0.62819
ggo_retrom00922	0.03696
ggo_retrop01096	0.14249
ggo_retrom01190	0.54097
ggo_retrop00487	0.02887
ggo_retrop00498	0.00671
ggo_retrop00378	0.0001
ggo_retrop00417	0.12723
ggo_retrop00425	0.10454
ggo_retrom01743	0.03795
ggo_retrom04276	0.11639
ggo_retrom04277	0.22928
ggo_retrop04303	0.19709
ggo_retrom04369	0.17023
ggo_retrom03588	0.14944
ggo_retrom03775	0.14719
ggoiretrop20035	0.0001
ggo_retrop01440	0.00489
ggo_retrom01581	0.06667
ggo_retrop01506	0.11358
orangutan_retro	dNdS
ppy_retrop18366	0.23557
ppy_retrop10678	0.20538
ppy_retrom07619	0.05304
ppy_retrom06910	0.00702
ppy_retrom06949	0.02795
ppyiretrom07059	0.25433
ppy_retrop04825	0.0001
ppy_retrop05125	0.08949
ppy_retrop10844	0.04856
ppy_retrom16162	0.11203
ppy_retrom16166	0.23484
ppy_retrop17472	0.17004
ppyiretrom36338	999
ppy_retrom16325	0.26691
ppy_retrop16572	0.79652
ppy_retrom15638	0.13409
ppy_retrom15664	0.64132
ppy_retrom15855	0.16769
ppy_retrom15061	0.1288
ppy_retrop14458	0.13975
ppyiretrop27845	0.46727
ppy_retrop11314	0.06094
macaque_retro	dNdS
mmu_retrop40387	0.21211
mmu_retrom08800	0.09444
mmu_retrop10339	0.12085
mmu_retrom20589	0.049
mmu_retrop13476	0.06623
mmu_retrom11625	0.00528
mmu_retrop13721	0.0001
mmu_retrop09478	0.99593
mmu_retrom05467	0.03238
mmu_retrop06436	0.0001
mmu_retrop36767	0.10482
mmu_retrom25906	0.1273
mmu_retrop32951	0.26507
mmu_retrop32955	0.11557
mmu_retrop33230	0.19378
mmu_retrom32458	0.20137
mmu_retrop30637	0.66661
mmu_retrom30456	0.15059
mmu_retrom30567	0.8606
mmu_retrom31065	0.19629
mmu_retrom28576	0.0354
mmuiretrop23105	0.23444
mmu_retrop17063	0.20487
mouse_retro	dNdS
mus_retrop114001	0.02989
mus_retrom125011	0.19393
mus_retrop114705	0.04235
musiretrop19621	0.18039
mus_retrom69830	0.43807
mus_retrom70053	0.20757
mus_retrop55007	0.21148
mus_retrom59282	0.03215
mus_retrop56772	0.5622
mus_retrop53855	0.06158
mus_retrop53990	0.02351
mus_retrom50460	0.00806
mus_retrop54426	0.31893
mus_retrop52885	0.12964
musiretrop08845	0.25332
mus_retrop50179	0.51242
mus_retrom42691	0.46095
mus_retrom43546	0.10232
mus_retrom41057	0.0562
mus_retrop45870	0.2222
mus_retrop46040	0.01717
mus_retrop46229	0.0673
mus_retrop112192	0.08194
mus_retrop112296	0.04857
mus_retrom102170	0.15085
mus_retrom99082	0.04156
mus_retrom96889	0.04349
mus_retrom96895	0.1591
mus_retrop92527	0.12493
mus_retrop79653	0.01677
mus_retrop89795	0.00954
mus_retrom72520	0.02828
rat_retro	dNdS
rno_retrom01825	0.0333
rno_retrop01833	0.39053
rno_retrop02069	0.03459
rno_retrom02258	0.18372
rno_retrop02235	0.04033
rno_retrom02354	0.09915
rnoiretrop16398	0.1575
rno_retrop02285	0.06541
rno_retrop02443	0.15857
rno_retrom00516	0.05098
rnoiretrop04195	0.01787
rnoiretrom04072	0.61947
rno_retrop00645	0.20115
rno_retrop00678	0.009
rno_retrop00703	0.03613
rno_retrop00448	0.03411
rnoiretrop01976	0.18184
rnoiretrop35108	0.04967
rnoiretrop42067	0.01777
rno_retrom05320	0.04268
rnoiretrop26298	0.05067
rnoiretrop26572	0.01191
rno_retrom03633	0.00978
rnoiretrop27666	0.3104
rno_retrom03205	0.40379
rnoiretrop23726	0.50711
rnoiretrom23402	0.23099
rnoiretrop24671	0.27332
rnoiretrop25027	0.40202
rno_retrop02493	0.09373
opossum_retro	dNdS
mdoiretrom28508	0.12852
mdo_retrom29312	0.04678
mdo_retrop30082	0.2063
mdo_retrop25519	0.2527
mdoiretrom13616	0.03109
mdoiretrom13192	0.00978
mdo_retrom08205	0.0046

## Sheet: out_of_A
# Supplemental Table 10: dN/dS for out-of-A retrogenes
# dN/dS ratios are computed on the retrogene branch by comparing the retrocopy and the ancestral sequence of the retrocopy at the time of the retroposition
# The analysis was performed using the codeml program from the PAML package and the orthologous parental sequence in mouse (for primate retrogenes), or in human (for other species)
# For all primates, we considered only retrogenes from primate-specific or eutherian-specific retrogene families (Supp. Table S6)
# For all rodents, we considered only retrogenes from rodent-specific or eutherian-specific retrogene families (Supp. Table S6)
# For opossum, we considered only retrogenes from marsupial-specific retrogene families (Supp. Table S6)
human_retro	dNdS
hsa_retrom00154	0.42722
hsa_retrop00375	0.24606
hsa_retrom04289	0.12184
hsa_retrom05384	1.78956
hsa_retrop08870	0.13228
hsa_retrom08497	0.0976
hsa_retrop09820	0.22735
hsa_retrop10688	0.49378
hsa_retrop11144	0.53375
hsairetrop10644	17.1186
hsa_retrop13389	0.41512
hsa_retrop13786	0.40489
hsa_retrom14423	0.34312
hsa_retrom14708	999
hsa_retrom15096	0.00283
hsa_retrop16723	0.3108
hsa_retrop16929	0.19063
hsa_retrop16950	0.00334
hsa_retrom16945	1.18447
hsa_retrom22262	0.13027
hsa_retrop24937	0.33255
hsa_retrom26243	0.28088
hsairetrop24499	0.00399
hsa_retrom27210	0.34982
hsa_retrom27453	1.25827
hsa_retrom28602	0.09497
hsa_retrop31280	0.60609
hsa_retrom30145	0.58922
hsa_retrop33264	0.06278
hsa_retrom32068	0.28998
hsa_retrop34597	0.02543
hsa_retrom32294	0.66286
hsa_retrop34887	0.76775
hsairetrom30555	0.00973
hsa_retrop37034	0.23118
hsa_retrom35513	0.21356
hsa_retrop37919	0.69938
hsa_retrop39197	2.91699
hsa_retrom38240	0.79488
hsa_retrom38978	0.21379
hsa_retrom40349	0.04127
chimpanzee_retro	dNdS
ptr_retrom09926	0.44117
ptr_retrop10324	0.26332
ptr_retrom05511	0.08658
ptr_retrop05057	0.13251
ptr_retrom05397	0.14842
ptr_retrom05948	0.24236
ptr_retrop05720	0.49287
ptr_retrop04066	0.00636
ptriretrop15155	22.1623
ptr_retrop03157	0.41246
ptr_retrop03246	0.38971
ptr_retrom03451	0.26699
ptr_retrom03545	999
ptr_retrop02897	0.2919
ptriretrom07749	0.0001
ptr_retrom02738	0.14917
ptriretrom07930	1.2079
ptriretrop05594	0.11773
ptriretrom06037	0.23194
ptriretrop04910	0.004
ptriretrom05050	0.29819
ptriretrom14062	0.1659
ptr_retrom09446	0.00218
ptr_retrom09675	0.10041
ptr_retrop09612	0.51675
ptr_retrom09263	0.603
ptr_retrop08877	0.05514
ptr_retrom08991	0.27498
ptr_retrop09480	0.02814
ptr_retrom09036	0.56199
ptr_retrop07664	0.77513
ptriretrom29203	0.01038
ptriretrop31265	0.18633
ptr_retrom07329	0.18029
ptr_retrop07284	0.48417
ptr_retrop07621	2.66167
ptr_retrom06821	0.74909
ptr_retrom06105	0.20094
ptriretrop21747	0.0001
ptriretrom22093	0.03251
ptriretrop22204	0.11212
ptriretrom22766	0.05198
gorilla_retro	dNdS
ggo_retrom04429	0.45788
ggo_retrop04454	0.31626
ggo_retrom02760	0.12792
ggo_retrom02121	0.91125
ggo_retrop02089	0.04511
ggo_retrop02312	0.11142
ggoiretrom17077	0.11204
ggo_retrop01847	0.2174
ggoiretrop14679	0.47149
ggo_retrop01171	0.40602
ggoiretrop09639	12.7072
ggo_retrop00694	0.36853
ggo_retrop00765	0.32157
ggo_retrom00801	0.40088
ggo_retrom00862	0.02138
ggo_retrom00696	0.56434
ggo_retrop00496	0.18146
ggoiretrom02775	0.30159
ggoiretrop01003	0.004
ggo_retrom00137	0.29245
ggo_retrom01402	0.13829
ggo_retrop01722	0.32834
ggo_retrom03958	0.00195
ggo_retrom04068	0.09609
ggo_retrop04224	0.53195
ggoiretrom32793	0.59276
ggo_retrom03400	0.34428
ggo_retrop03481	0.05551
ggo_retrom03587	0.28261
ggo_retrop03593	0.02781
ggoiretrom26992	0.40269
ggo_retrop03636	1.38034
ggo_retrom03687	0.01003
ggo_retrop03848	0.29461
ggo_retrom03138	0.22354
ggo_retrop03074	0.73788
ggo_retrop03207	0.29765
ggoiretrop25397	999
ggo_retrom02661	0.75568
ggo_retrom01554	0.20027
ggoiretrom11488	0.05022
orangutan_retro	dNdS
ppy_retrop19460	0.47419
ppy_retrom10418	0.0853
ppy_retrop10098	0.62601
ppy_retrop10253	0.11028
ppy_retrom10262	0.1419
ppy_retrop12234	0.05679
ppyiretrop26220	0.41141
ppy_retrop09164	0.52005
ppyiretrop17378	130.412
ppy_retrop07091	0.36098
ppy_retrop07256	0.29764
ppyiretrom11931	0.38991
ppy_retrop06394	0.42502
ppy_retrom06920	0.19119
ppyiretrom12290	1.05997
ppyiretrop08464	0.09124
ppyiretrom08379	0.25068
ppy_retrom02856	0.39195
ppyiretrop16855	0.13526
ppyiretrop22566	0.35834
ppyiretrop38637	0.10472
ppyiretrop37262	0.52712
ppy_retrom16239	0.62701
ppy_retrop16805	0.06081
ppy_retrom15854	0.28417
ppy_retrom15952	0.54591
ppy_retrop15211	1.18477
ppyiretrom31424	0.00973
ppyiretrop34239	0.2673
ppy_retrom13480	0.03232
ppy_retrop14308	0.60171
ppyiretrop31583	0.44517
ppyiretrom26748	0.89977
ppyiretrom23014	4.1143
ppy_retrop11490	0.21042
macaque_retro	dNdS
mmu_retrom36095	0.52456
mmu_retrop38023	0.94066
mmu_retrop09860	0.29428
mmuiretrop10780	0.004
mmu_retrom09603	0.33295
mmu_retrop17936	0.00559
mmu_retrop12623	0.33673
mmu_retrom17528	0.08225
mmu_retrom13785	999
mmu_retrop16057	0.12377
mmuiretrom13524	0.17435
mmuiretrop12468	0.06211
mmu_retrop13686	0.21353
mmu_retrop08283	0.26566
mmu_retrop09242	0.33205
mmu_retrop06579	0.01994
mmu_retrom05409	0.15623
mmuiretrom04906	0.7989
mmu_retrom32835	0.08615
mmu_retrom34358	0.19996
mmu_retrom07504	0.79601
mmu_retrom34686	0.1634
mmu_retrop36525	0.27235
mmu_retrop37688	1.56432
mmu_retrop25541	0.26516
mmuiretrom23008	0.01012
mmu_retrom26672	0.24633
mmu_retrop32916	0.47603
mmu_retrom32216	0.56538
mmuiretrop30551	0.12488
mmu_retrom31060	0.27693
mmu_retrop32167	0.02088
mmu_retrom31333	0.34697
mmu_retrop28095	0.38278
mmu_retrop28449	0.38238
mmuiretrom24514	0.35184
mmu_retrom21300	0.50601
mmu_retrom14788	0.11832
mouse_retro	dNdS
mus_retrom123929	0.44061
mus_retrom69527	0.22823
mus_retrop70634	0.00429
mus_retrop71221	0.27205
mus_retrom69903	0.16348
mus_retrom59026	0.02349
mus_retrom61496	0.35765
musiretrom13624	0.3039
mus_retrop53974	0.21338
mus_retrom49442	0.9977
mus_retrom46474	0.24135
musiretrop06657	0.13565
mus_retrom42194	0.19565
mus_retrom42698	0.43795
mus_retrom43775	0.24721
mus_retrom43922	0.09418
mus_retrom41298	0.23184
musiretrom03116	0.29168
mus_retrop45643	0.2176
musiretrom03954	0.10168
musiretrop03405	0.02866
musiretrom03960	0.24345
mus_retrop45861	0.03587
musiretrom03012	0.07264
mus_retrom40716	0.17911
mus_retrop44349	0.26762
mus_retrop44371	0.58829
mus_retrom100617	0.16472
musiretrom34214	0.32171
mus_retrom101969	0.25544
mus_retrop96971	0.19128
mus_retrom97891	0.16343
mus_retrop93365	0.07098
mus_retrom98541	0.02018
musiretrop30459	0.0001
mus_retrop91832	0.14248
mus_retrop92578	0.21519
musiretrom28553	0.1361
mus_retrom97643	0.15541
musiretrop30372	0.14752
mus_retrop76052	0.21125
musiretrom22866	0.00518
mus_retrom79426	0.50543
mus_retrom79905	0.40162
musiretrop24940	0.12004
mus_retrom80325	0.1541
mus_retrom80482	0.43216
mus_retrom90513	0.08367
mus_retrop73764	0.00317
mus_retrom72541	234.393
mus_retrom73056	0.69586
musiretrom15167	0.1339
rat_retro	dNdS
rnoiretrop46431	0.19231
rnoiretrop46976	0.22274
rno_retrom06929	0.06577
rno_retrom07089	0.4588
rnoiretrom53961	0.0952
rno_retrom07517	0.17988
rnoiretrop51865	0.33529
rnoiretrop51898	0.56039
rnoiretrom12303	0.00959
rnoiretrom13712	0.18613
rno_retrop01940	0.31255
rnoiretrom05421	0.22224
rno_retrop00066	0.14366
rno_retrop00117	0.14543
rno_retrom02344	0.0337
rno_retrom00957	0.00338
rno_retrom00583	0.24532
rnoiretrom03774	0.061
rno_retrop00610	0.1916
rnoiretrom03962	0.11025
rno_retrop00642	0.04987
rno_retrop00449	1.59601
rnoiretrom03218	0.05636
rnoiretrop42635	0.13627
rnoiretrop42695	0.0001
rno_retrom06277	0.14801
rno_retrom06289	0.17619
rnoiretrom46079	0.22855
rnoiretrop45316	0.56439
rnoiretrop45337	0.22628
rnoiretrom01748	0.00416
rno_retrop00249	0.40685
rnoiretrop34937	0.13036
rno_retrom05517	0.20256
rnoiretrop39959	0.0435
rno_retrom05705	0.00533
rno_retrom05901	0.41419
rno_retrom05963	0.47019
rnoiretrop41572	0.12162
rno_retrom06067	0.12381
rno_retrom05148	0.03197
rnoiretrop36353	0.07075
rno_retrom05235	0.01525
rno_retrom03501	0.09437
rnoiretrop26500	0.19079
rno_retrom03206	0.30599
rnoiretrom23055	0.20251
rno_retrom03259	0.22243
rnoiretrom24409	0.23512
rnoiretrom18953	0.11791
rno_retrom02563	0.42104
rno_retrom02690	0.28402
opossum_retro	dNdS
mdoiretrom29350	0.29619
mdoiretrop26432	0.03943
mdoiretrop29815	0.0169
mdo_retrom26963	999
mdo_retrop26985	0.7205
mdo_retrom28157	0.00281
mdo_retrop29131	0.17331
mdo_retrop31059	0.26291
mdo_retrom25495	0.04605
mdo_retrom25843	0.00419
mdo_retrop17921	0.69417
mdoiretrop15857	0.20486
mdoiretrop15978	0.16967
mdoiretrom16569	0.12255
mdo_retrom21173	0.57343
mdo_retrop14478	0.21854
mdo_retrop15690	1.77193
mdo_retrop16117	0.10058
mdoiretrop06131	0.003
mdo_retrom07982	0.01159
mdo_retrom09037	1.36404
mdo_retrop08836	0.24526
mdo_retrop03297	0.68617
mdo_retrom05215	0.40048
mdo_retrom05402	0.48476
mdo_retrom05444	0.00524
mdo_retrop11440	0.00547
mdo_retrop11845	0.40169
mdo_retrom12143	0.19804
mdo_retrop12248	0.14154
mdo_retrop12835	0.09508
mdo_retrop00882	0.08172
