# Supplementary material for: The life history of retrocopies illuminates the evolution of new mammalian genes
Source: HighWire-hosted journal article supplement (doi:10.1101/gr.198473.115), 2016-01-04
Supplement: Supplemental_Tables.zip [file Supplemental_Table_S11.xlsx]

## Sheet: Human
# Supplemental Table S11: Retrocopy transcripts in human (BED12 format)
Chromosome	Start	End	Transcript_ID	Score (not defined)	Strand	Thick Start (not defined)	Thick End (not defined)	Item_RGB (not defined)	Exon_count	Exon_sizes	Exon_starts
1	27189655	27190467	hsa_retrop00372.0	0	+	27189655	27190467	0	1	812,	0,
1	40235223	40236860	hsa_retrom00812.0	0	-	40235223	40236860	0	1	1637,	0,
1	47073428	47079331	hsa_retrom00937.0	0	-	47073428	47079331	0	3	1928,203,756,	0,2245,5147,
1	47073428	47082501	hsa_retrom00937.1	0	-	47073428	47082501	0	4	1928,203,468,119,	0,2245,5147,8954,
1	53903752	53904517	hsa_retrom01069.0	0	-	53903752	53904517	0	1	765,	0,
1	59041142	59042968	hsa_retrom01098.0	0	-	59041142	59042968	0	1	1826,	0,
1	89448179	89458460	hsa_retrom01308.0	0	-	89448179	89458460	0	2	1570,193,	0,10088,
1	89448179	89458460	hsa_retrom01308.1	0	-	89448179	89458460	0	3	1570,100,193,	0,5755,10088,
1	89569559	89571822	hsa_retrom01315.0	0	-	89569559	89571822	0	1	2263,	0,
1	96912501	96913254	hsa_retrop01729.0	0	+	96912501	96913254	0	1	753,	0,
1	104112241	104113312	hsa_retrop01785.0	0	+	104112241	104113312	0	1	1071,	0,
1	146649481	146651390	hsa_retrop02787.0	0	+	146649481	146651390	0	1	1909,	0,
1	149398802	149400536	hsairetrom01971.0	0	-	149398802	149400536	0	2	364,406,	0,1328,
1	160639936	160641253	hsa_retrop03315.0	0	+	160639936	160641253	0	1	1317,	0,
1	161494238	161496621	hsa_retrop03388.0	0	+	161494238	161496621	0	1	2383,	0,
1	161576095	161577994	hsa_retrop03433.0	0	+	161576095	161577994	0	1	1899,	0,
1	185302151	185304137	hsa_retrom03052.0	0	-	185302151	185304137	0	3	283,122,45,	0,1246,1941,
1	201487412	201489776	hsa_retrop03757.0	0	+	201487412	201489776	0	1	2364,	0,
1	201487412	201490650	hsa_retrop03757.1	0	+	201487412	201490650	0	2	2366,82,	0,3156,
1	201487412	201499443	hsa_retrop03757.2	0	+	201487412	201499443	0	2	2366,222,	0,11809,
1	209405388	209407488	hsa_retrop03847.0	0	+	209405388	209407488	0	1	2100,	0,
1	228611917	228613117	hsairetrom03253.0	0	-	228611917	228613117	0	1	1200,	0,
1	228823166	228823281	hsa_retrop04054.0	0	+	228823166	228823281	0	1	115,	0,
1	228871242	228880523	hsairetrop03487.0	0	+	228871242	228880523	0	3	509,59,1492,	0,2177,7789,
1	228871242	228882395	hsairetrop03487.1	0	+	228871242	228882395	0	3	509,59,3364,	0,2177,7789,
1	236558715	236648194	hsa_retrop04145.0	0	+	236558715	236648194	0	6	245,59,40,59,46,2628,	0,13800,18844,31976,72815,86851,
10	5566902	5567459	hsa_retrop04800.0	0	-	5566902	5567459	0	1	557,	0,
10	5902940	5922336	hsa_retrom04012.0	0	-	5902940	5922336	0	3	1714,191,76,	0,17119,19320,
10	43881394	43904256	hsa_retrom04289.0	0	-	43881394	43904256	0	4	1990,59,135,82,	0,8683,10509,22780,
10	46914442	46914805	hsa_retrop05104.0	0	+	46914442	46914805	0	1	363,	0,
10	53455259	53459544	hsa_retrom04584.0	0	-	53455259	53459544	0	1	4285,	0,
10	70392170	70392562	hsa_retrop05358.0	0	+	70392170	70392562	0	1	392,	0,
10	75491235	75492690	hsairetrop04798.0	0	+	75491235	75492690	0	1	1455,	0,
10	81272388	81276349	hsa_retrop05507.0	0	+	81272388	81276349	0	1	3961,	0,
10	82006995	82007424	hsa_retrom04803.0	0	-	82006995	82007424	0	1	429,	0,
10	86320378	86320670	hsa_retrop05527.0	0	+	86320378	86320670	0	1	292,	0,
10	95717949	95721259	hsa_retrom04888.0	0	-	95717949	95721259	0	1	3310,	0,
10	131904071	131906921	hsa_retrop05893.0	0	+	131904071	131906921	0	1	2850,	0,
11	3848212	3862165	hsa_retrom05363.0	0	-	3848212	3862165	0	2	1224,42,	0,13911,
11	7110208	7113038	hsa_retrop06597.0	0	+	7110208	7113038	0	1	2830,	0,
11	9681972	9682223	hsa_retrop06662.0	0	+	9681972	9682223	0	1	251,	0,
11	33258549	33258946	hsairetrop06330.0	0	+	33258549	33258946	0	1	397,	0,
11	49454403	49455564	hsa_retrom06422.1	0	-	49454403	49455564	0	1	1161,	0,
11	49454862	49455554	hsa_retrom06422.0	0	-	49454862	49455554	0	1	692,	0,
11	63010405	63012843	hsa_retrop08306.0	0	+	63010405	63012843	0	1	2438,	0,
11	74456765	74457076	hsa_retrom07729.0	0	-	74456765	74457076	0	1	311,	0,
11	74630576	74631269	hsa_retrop08588.0	0	+	74630576	74631269	0	1	693,	0,
11	77524374	77524776	hsa_retrom07773.0	0	-	77524374	77524776	0	1	402,	0,
11	103907373	103909448	hsa_retrop08870.0	0	+	103907373	103909448	0	1	2075,	0,
11	110976186	110976695	hsa_retrom08039.0	0	-	110976186	110976695	0	1	509,	0,
11	112088945	112089481	hsa_retrop08908.0	0	+	112088945	112089481	0	1	536,	0,
11	122830654	122832742	hsa_retrop08973.0	0	+	122830654	122832742	0	1	2088,	0,
11	124981924	124984849	hsa_retrop09153.0	0	+	124981924	124984849	0	1	2925,	0,
11	124981924	124995221	hsa_retrop09153.1	0	+	124981924	124995221	0	2	2917,97,	0,13200,
11	129902593	129903132	hsa_retrom08497.0	0	-	129902593	129903132	0	1	539,	0,
12	6982707	6994620	hsa_retrop09348.0	0	+	6982707	6994620	0	3	238,132,1753,	0,8652,10160,
12	6982707	6994620	hsa_retrop09348.0	0	+	6982707	6994620	0	3	238,132,1753,	0,8652,10160,
12	6982708	6994619	hsa_retrop09348.1	0	+	6982708	6994619	0	4	237,132,216,1085,	0,8651,10159,10826,
12	6982708	6994619	hsa_retrop09348.1	0	+	6982708	6994619	0	4	237,132,216,1085,	0,8651,10159,10826,
12	6982708	6994619	hsa_retrop09348.2	0	+	6982708	6994619	0	3	237,216,1085,	0,10159,10826,
12	6982708	6994619	hsa_retrop09348.2	0	+	6982708	6994619	0	3	237,216,1085,	0,10159,10826,
12	9833518	9849604	hsa_retrop09436.0	0	+	9833518	9849604	0	4	111,185,104,2249,	0,6979,11905,13837,
12	10658509	10660225	hsa_retrop09455.0	0	+	10658509	10660225	0	1	1716,	0,
12	13154615	13157807	hsa_retrop09498.0	0	+	13154615	13157807	0	1	3192,	0,
12	31404926	31405318	hsa_retrom08913.0	0	-	31404926	31405318	0	1	392,	0,
12	31944288	31945292	hsa_retrom08956.0	0	-	31944288	31945292	0	1	1004,	0,
12	47610267	47630434	hsa_retrop09820.0	0	+	47610267	47630434	0	2	205,1645,	0,18522,
12	49296433	49297705	hsa_retrom09188.0	0	-	49296433	49297705	0	1	1272,	0,
12	64215802	64217768	hsa_retrop10420.0	0	+	64215802	64217768	0	1	1966,	0,
12	64784496	64790801	hsa_retrop10427.0	0	+	64784496	64790801	0	3	712,102,519,	0,860,5786,
12	64784496	64790801	hsa_retrop10427.1	0	+	64784496	64790801	0	3	712,102,508,	0,860,5797,
12	88176336	88178174	hsa_retrom09616.1	0	-	88176336	88178174	0	1	1838,	0,
12	89916871	89918201	hsa_retrom09624.0	0	-	89916871	89918201	0	1	1330,	0,
12	98847971	98850879	hsa_retrom09707.0	0	-	98847971	98850879	0	1	2908,	0,
12	104697526	104698819	hsa_retrop10688.0	0	+	104697526	104698819	0	1	1293,	0,
12	117013843	117014371	hsa_retrop10816.0	0	+	117013843	117014371	0	1	528,	0,
12	119616748	119633775	hsa_retrop10824.1	0	+	119616748	119633775	0	3	736,64,2272,	0,8081,14755,
12	119617067	119633770	hsa_retrop10824.0	0	+	119617067	119633770	0	3	417,64,2267,	0,7762,14436,
12	121352258	121352787	hsa_retrop10873.0	0	+	121352258	121352787	0	1	529,	0,
12	133402300	133402685	hsa_retrop10948.0	0	+	133402300	133402685	0	1	385,	0,
13	21893191	21895206	hsa_retrop11086.0	0	+	21893191	21895206	0	1	2015,	0,
13	23270325	23270644	hsa_retrom10036.0	0	-	23270325	23270644	0	1	319,	0,
13	23489126	23493291	hsa_retrop11094.0	0	+	23489126	23493291	0	1	4165,	0,
13	25670326	25672363	hsa_retrop11144.0	0	+	25670326	25672363	0	1	2037,	0,
13	28194510	28197552	hsairetrop10644.0	0	+	28194510	28197552	0	3	731,673,541,	0,963,2501,
13	31002110	31003828	hsa_retrop11217.0	0	+	31002110	31003828	0	1	1718,	0,
13	45964490	45965400	hsa_retrom10321.0	0	-	45964490	45965400	0	1	910,	0,
13	52482677	52484726	hsa_retrom10386.0	0	-	52482677	52484726	0	1	2049,	0,
13	52586524	52608235	hsa_retrop11436.0	0	+	52586524	52608235	0	2	74,5781,	0,15930,
13	52586524	52608235	hsa_retrop11436.1	0	+	52586524	52608235	0	4	74,231,932,5781,	0,6524,11617,15930,
13	53216648	53217827	hsa_retrop11442.0	0	+	53216648	53217827	0	1	1179,	0,
13	64385142	64385684	hsairetrom10531.0	0	-	64385142	64385684	0	1	542,	0,
13	75812048	75813308	hsa_retrom10489.0	0	-	75812048	75813308	0	1	1260,	0,
13	98086382	98120182	hsa_retrop11679.0	0	+	98086382	98120182	0	2	656,3724,	0,30076,
14	47120219	47120998	hsa_retrom11235.0	0	-	47120219	47120998	0	1	779,	0,
14	50039908	50044568	hsa_retrom11245.0	0	-	50039908	50044568	0	1	4660,	0,
14	50085409	50089835	hsa_retrom11253.0	0	-	50085409	50089835	0	3	449,487,1872,	0,1870,2554,
14	50359792	50363761	hsa_retrop12685.0	0	+	50359792	50363761	0	2	83,3788,	0,181,
14	55765623	55766034	hsa_retrop12739.0	0	+	55765623	55766034	0	1	411,	0,
14	56233102	56233921	hsa_retrop12751.0	0	+	56233102	56233921	0	1	819,	0,
14	59294230	59294883	hsa_retrom11329.0	0	-	59294230	59294883	0	1	653,	0,
14	61744482	61748525	hsairetrom11641.0	0	-	61744482	61748525	0	1	4043,	0,
14	65007360	65009897	hsa_retrop12913.1	0	+	65007360	65009897	0	1	2537,	0,
14	65007562	65009892	hsa_retrop12913.0	0	+	65007562	65009892	0	1	2330,	0,
14	66479652	66480241	hsa_retrom11399.0	0	-	66479652	66480241	0	1	589,	0,
14	102144218	102144565	hsa_retrop13243.0	0	+	102144218	102144565	0	1	347,	0,
15	21936549	21938285	hsa_retrom13826.0	0	-	21936549	21938285	0	1	1736,	0,
15	22015165	22016921	hsa_retrom13828.0	0	-	22015165	22016921	0	1	1756,	0,
15	23810861	23812902	hsa_retrop13389.0	0	+	23810861	23812902	0	1	2041,	0,
15	23810861	23812902	hsa_retrop13389.1	0	+	23810861	23812902	0	2	995,948,	0,1093,
15	30336854	30337954	hsa_retrop13418.0	0	+	30336854	30337954	0	1	1100,	0,
15	35589097	35591696	hsa_retrom14115.0	0	-	35589097	35591696	0	1	2599,	0,
15	37091841	37110740	hsa_retrom14133.0	0	-	37091841	37110740	0	4	188,69,112,813,	0,4937,17536,18086,
15	41164412	41166031	hsa_retrom14185.0	0	-	41164412	41166031	0	2	1287,150,	0,1469,
15	41164412	41166521	hsa_retrom14185.1	0	-	41164412	41166521	0	3	1287,59,392,	0,1469,1717,
15	59499031	59500655	hsa_retrop13786.0	0	+	59499031	59500655	0	1	1624,	0,
15	60060611	60061337	hsa_retrop13823.0	0	+	60060611	60061337	0	1	726,	0,
15	66671304	66679090	hsa_retrom14451.0	0	-	66671304	66679090	0	2	974,146,	0,7640,
15	79527913	79529535	hsa_retrop13991.0	0	+	79527913	79529535	0	1	1622,	0,
15	89630821	89745505	hsa_retrom14678.0	0	+	89630821	89745505	0	11	973,100,200,176,168,184,93,111,70,85,7048,	0,26134,28731,64086,67776,88221,97833,100602,103489,105644,107636,
15	89647465	89744416	hsa_retrom14678.1	0	+	89647465	89744416	0	11	36,100,200,176,168,184,93,111,70,85,5959,	0,9490,12087,47442,51132,71577,81189,83958,86845,89000,90992,
15	90808915	90821046	hsa_retrop14076.0	0	+	90808915	90821046	0	2	715,6627,	0,5504,
16	436753	437295	hsa_retrop14314.0	0	+	436753	437295	0	1	542,	0,
16	3546178	3546671	hsa_retrop14545.0	0	+	3546178	3546671	0	1	493,	0,
16	30454985	30457177	hsa_retrom15096.0	0	-	30454985	30457177	0	1	2192,	0,
16	30832020	30833190	hsa_retrom15135.0	0	-	30832020	30833190	0	1	1170,	0,
16	73974495	73975248	hsa_retrom15543.0	0	-	73974495	73975248	0	1	753,	0,
16	74701202	74702710	hsa_retrop15316.0	0	+	74701202	74702710	0	1	1508,	0,
16	76268445	76269582	hsa_retrom15569.0	0	-	76268445	76269582	0	1	1137,	0,
16	82031216	82034536	hsa_retrom15613.0	0	-	82031216	82034536	0	2	2613,141,	0,3179,
16	82031216	82045082	hsa_retrom15613.2	0	-	82031216	82045082	0	3	2613,94,91,	0,3179,13775,
16	90237448	90238195	hsairetrop15481.0	0	+	90237448	90238195	0	1	747,	0,
17	2210071	2210962	hsa_retrop15796.0	0	+	2210071	2210962	0	1	891,	0,
17	15607549	15608185	hsa_retrom16105.0	0	-	15607549	15608185	0	1	636,	0,
17	15690212	15693715	hsa_retrop16032.0	0	+	15690212	15693715	0	1	3503,	0,
17	17286906	17287317	hsa_retrom16120.0	0	-	17286906	17287317	0	1	411,	0,
17	19398697	19401069	hsa_retrop16108.0	0	+	19398697	19401069	0	1	2372,	0,
17	19398697	19410124	hsa_retrop16108.1	0	+	19398697	19410124	0	3	2221,217,274,	0,2851,11153,
17	20492443	20494072	hsa_retrop16159.0	0	+	20492443	20494072	0	1	1629,	0,
17	21407893	21408273	hsa_retrop16192.0	0	+	21407893	21408273	0	1	380,	0,
17	26603002	26634365	hsa_retrom16178.1	0	-	26603002	26634365	0	3	1435,117,308,	0,30117,31055,
17	26603005	26634014	hsa_retrom16178.0	0	-	26603005	26634014	0	3	1432,117,13,	0,30114,30996,
17	26794935	26795455	hsa_retrop16218.0	0	+	26794935	26795455	0	1	520,	0,
17	30554859	30555268	hsa_retrom16228.0	0	-	30554859	30555268	0	1	409,	0,
17	43662330	43664586	hsa_retrop16438.0	0	+	43662330	43664586	0	1	2256,	0,
17	51900315	51902462	hsa_retrop16508.0	0	+	51900315	51902462	0	1	2147,	0,
17	59667802	59668530	hsairetrom16610.0	0	-	59667802	59668530	0	1	728,	0,
17	61688109	61689440	hsa_retrom16583.0	0	-	61688109	61689440	0	1	1331,	0,
17	65220803	65221156	hsa_retrop16660.0	0	+	65220803	65221156	0	1	353,	0,
17	66127474	66132546	hsa_retrom16660.0	0	-	66127474	66132546	0	1	5072,	0,
18	580399	581451	hsa_retrop16833.0	0	+	580399	581451	0	1	1052,	0,
18	580505	581430	hsa_retrop16833.1	0	+	580505	581430	0	1	925,	0,
18	9885983	9888142	hsa_retrop16929.1	0	+	9885983	9888142	0	2	297,1557,	0,602,
18	9885983	9888142	hsa_retrop16929.2	0	+	9885983	9888142	0	4	297,821,9,637,	0,602,1468,1522,
18	9885987	9888142	hsa_retrop16929.0	0	+	9885987	9888142	0	3	90,821,691,	0,598,1464,
18	11851421	11852735	hsa_retrop16950.0	0	+	11851421	11852735	0	1	1314,	0,
18	19993615	19997889	hsa_retrom16935.0	0	-	19993615	19997889	0	1	4274,	0,
18	29304300	29306636	hsairetrom17263.0	0	-	29304300	29306636	0	1	2336,	0,
18	54814359	54816595	hsa_retrop17190.0	0	+	54814359	54816595	0	1	2236,	0,
18	57676886	57678383	hsa_retrom17123.0	0	-	57676886	57678383	0	1	1497,	0,
19	2071035	2096253	hsa_retrom17205.0	0	-	2071035	2096253	0	5	2388,203,540,154,29,	0,5774,7103,14138,25189,
19	11925051	11944703	hsa_retrop17947.1	0	+	11925051	11944703	0	4	214,127,61,2521,	0,16046,16380,17131,
19	11925051	11946393	hsa_retrop17947.0	0	+	11925051	11946393	0	3	214,61,4211,	0,16380,17131,
19	11940652	11946393	hsa_retrop17947.2	0	+	11940652	11946393	0	3	572,61,4211,	0,779,1530,
19	16020259	16023465	hsa_retrom18615.0	0	-	16020259	16023465	0	1	3206,	0,
19	29281776	29283278	hsa_retrom18761.0	0	-	29281776	29283278	0	1	1502,	0,
19	30526998	30529038	hsa_retrop18511.0	0	+	30526998	30529038	0	1	2040,	0,
19	38187328	38188648	hsa_retrom19154.0	0	-	38187328	38188648	0	1	1320,	0,
19	38280840	38284308	hsa_retrop18784.0	0	+	38280840	38284308	0	2	2422,1004,	0,2464,
19	38280840	38284308	hsa_retrop18784.1	0	+	38280840	38284308	0	1	3468,	0,
19	42989197	42989859	hsa_retrom19225.0	0	-	42989197	42989859	0	1	662,	0,
19	44931732	44952799	hsairetrom18830.1	0	-	44931732	44952799	0	6	2985,600,59,211,88,303,	0,4209,15014,15265,19968,20764,
19	50410095	50434058	hsa_retrom20014.0	0	-	50410095	50434058	0	3	3046,122,1476,	0,20855,22487,
19	53792860	53794575	hsa_retrom21350.0	0	-	53792860	53794575	0	1	1715,	0,
19	53935236	53946106	hsa_retrop20291.0	0	+	53935236	53946106	0	2	45,1058,	0,9812,
19	53943079	53946106	hsa_retrop20291.1	0	+	53943079	53946106	0	2	107,1058,	0,1969,
19	53944998	53946106	hsa_retrop20291.2	0	+	53944998	53946106	0	1	1108,	0,
19	57874852	57876637	hsa_retrop21106.0	0	+	57874852	57876637	0	2	219,455,	0,1330,
19	58378430	58379974	hsa_retrop21156.0	0	+	58378430	58379974	0	1	1544,	0,
19	58555915	58559473	hsa_retrop21162.0	0	+	58555915	58559473	0	1	3558,	0,
19	58555915	58563996	hsa_retrop21162.1	0	+	58555915	58563996	0	2	2759,139,	0,7942,
19	58637656	58654536	hsairetrom19523.1	0	-	58637656	58654536	0	3	3222,105,65,	0,16267,16815,
19	58638890	58666451	hsairetrom19523.0	0	-	58638890	58666451	0	3	1988,105,657,	0,15033,26904,
19	58918588	58931339	hsa_retrop21238.0	0	+	58918588	58931339	0	5	1944,151,123,2171,735,	0,2719,8302,9589,12016,
2	20646850	20649166	hsa_retrop21604.0	0	+	20646850	20649166	0	1	2316,	0,
2	26045175	26046317	hsa_retrop21638.0	0	+	26045175	26046317	0	1	1142,	0,
2	46739020	46747096	hsa_retrom22262.0	0	-	46739020	46747096	0	2	931,1013,	0,7063,
2	70314701	70316275	hsa_retrop21972.0	0	+	70314701	70316275	0	1	1574,	0,
2	84517809	84520694	hsa_retrop22050.0	0	+	84517809	84520694	0	1	2885,	0,
2	84517809	84520694	hsa_retrop22050.1	0	+	84517809	84520694	0	2	1148,1440,	0,1445,
2	101887739	101891869	hsa_retrom24357.0	0	-	101887739	101891869	0	3	467,215,1377,	0,1849,2753,
2	101889329	101891869	hsa_retrom24357.1	0	-	101889329	101891869	0	1	2540,	0,
2	105471900	105477432	hsairetrop21141.1	0	+	105471900	105477432	0	1	5532,	0,
2	114368078	114384660	hsa_retrom24456.0	0	-	114368078	114384660	0	3	1746,121,46,	0,15107,16536,
2	120974846	120980512	hsa_retrom24471.1	0	-	120974846	120980512	0	1	5666,	0,
2	120974846	120980987	hsa_retrom24471.0	0	-	120974846	120980987	0	1	6141,	0,
2	130949340	130956001	hsa_retrom24569.0	0	-	130949340	130956001	0	5	360,681,149,223,71,	0,2018,3311,4381,6590,
2	130986952	130990220	hsa_retrop24247.0	0	+	130986952	130990220	0	1	3268,	0,
2	132383872	132384529	hsa_retrop24414.0	0	+	132383872	132384529	0	1	657,	0,
2	132480666	132481926	hsa_retrom24685.0	0	-	132480666	132481926	0	1	1260,	0,
2	172373746	172374110	hsa_retrom24961.0	0	-	172373746	172374110	0	1	364,	0,
2	180263935	180265257	hsairetrom21718.0	0	-	180263935	180265257	0	1	1322,	0,
2	181737649	181738023	hsa_retrom25064.0	0	-	181737649	181738023	0	1	374,	0,
2	192745849	192746741	hsa_retrom25163.0	0	-	192745849	192746741	0	1	892,	0,
2	202484959	202507383	hsairetrom21886.0	0	-	202484959	202507383	0	14	4086,122,94,74,192,124,158,121,90,138,57,5,32,52,	0,5789,7084,7839,8993,9492,11814,13074,14567,16511,18752,20024,20656,22372,
2	213695723	213698382	hsa_retrop24944.0	0	+	213695723	213698382	0	1	2659,	0,
2	213695723	213698382	hsa_retrop24944.1	0	+	213695723	213698382	0	2	365,2158,	0,501,
2	231379931	231380666	hsa_retrop25085.0	0	+	231379931	231380666	0	1	735,	0,
2	233206996	233208932	hsa_retrop25100.0	0	+	233206996	233208932	0	1	1936,	0,
2	234774157	234777032	hsa_retrom25572.0	0	-	234774157	234777032	0	2	1839,60,	0,2815,
20	4004563	4005077	hsa_retrop25238.0	0	+	4004563	4005077	0	1	514,	0,
20	14738380	14738571	hsa_retrop25310.0	0	+	14738380	14738571	0	1	191,	0,
20	23331466	23335382	hsa_retrop25503.0	0	+	23331466	23335382	0	2	232,765,	0,3151,
20	30865565	30920695	hsa_retrop25540.3	0	+	30865565	30920695	0	9	3,1469,102,123,119,114,106,179,1670,	0,31950,38455,38764,38993,49008,49793,52378,53460,
20	30865565	30922749	hsa_retrop25540.1	0	+	30865565	30922749	0	9	3,1469,102,123,119,114,106,179,3724,	0,31950,38455,38764,38993,49008,49793,52378,53460,
20	30865566	30919097	hsa_retrop25540.0	0	+	30865566	30919097	0	10	2,1188,153,102,123,119,114,106,179,72,	0,31949,33265,38454,38763,38992,49007,49792,52377,53459,
20	30897517	30919349	hsa_retrop25540.2	0	+	30897517	30919349	0	9	1186,153,102,123,119,114,106,179,324,	0,1314,6503,6812,7041,17056,17841,20426,21508,
20	39825426	39825809	hsa_retrop25623.0	0	+	39825426	39825809	0	1	383,	0,
20	41859381	41860030	hsa_retrop25644.0	0	+	41859381	41860030	0	1	649,	0,
20	52491192	52492206	hsa_retrom26243.1	0	-	52491192	52492206	0	1	1014,	0,
20	62492624	62522881	hsa_retrop25796.0	0	+	62492624	62522881	0	7	4113,146,149,60,102,49,1679,	0,8024,12396,14544,21447,27918,28578,
21	20617197	20618173	hsa_retrop25874.0	0	+	20617197	20618173	0	1	976,	0,
21	30367918	30370362	hsa_retrom26428.0	0	-	30367918	30370362	0	2	813,283,	0,2161,
21	37259022	37260184	hsa_retrop25927.0	0	+	37259022	37260184	0	1	1162,	0,
21	37504747	37505328	hsa_retrop25951.0	0	+	37504747	37505328	0	1	581,	0,
22	21044373	21046223	hsairetrop24010.0	0	+	21044373	21046223	0	1	1850,	0,
22	21479379	21482357	hsairetrom23993.0	0	-	21479379	21482357	0	1	2978,	0,
22	22838863	22863462	hsa_retrom26906.0	0	-	22838863	22863462	0	3	4928,118,486,	0,9518,24113,
22	22838863	22863462	hsa_retrom26906.1	0	-	22838863	22863462	0	4	4928,118,61,486,	0,9518,23264,24113,
22	23412571	23467204	hsairetrop24499.0	0	+	23412571	23467204	0	3	185,1172,1931,	0,24862,52702,
22	31050160	31051269	hsa_retrom27038.0	0	-	31050160	31051269	0	1	1109,	0,
22	32340563	32353578	hsa_retrop27767.0	0	+	32340563	32353578	0	2	243,1453,	0,11562,
22	39516229	39516575	hsa_retrom27178.0	0	-	39516229	39516575	0	1	346,	0,
22	41257065	41258337	hsa_retrom27210.0	0	-	41257065	41258337	0	1	1272,	0,
22	41460170	41460615	hsa_retrop27853.2	0	+	41460170	41460615	0	1	445,	0,
22	41460181	41460614	hsa_retrop27853.1	0	+	41460181	41460614	0	1	433,	0,
22	41460189	41460614	hsa_retrop27853.0	0	+	41460189	41460614	0	1	425,	0,
22	51222196	51238629	hsa_retrop27887.0	0	+	51222196	51238629	0	3	253,121,1547,	0,1404,14886,
22	51222197	51243280	hsa_retrop27887.1	0	+	51222197	51243280	0	3	95,121,6198,	0,1403,14885,
3	27674432	27676319	hsa_retrop28158.0	0	+	27674432	27676319	0	1	1887,	0,
3	27674432	27680120	hsa_retrop28158.1	0	+	27674432	27680120	0	2	842,621,	0,5067,
3	38568257	38569012	hsa_retrom27562.0	0	-	38568257	38569012	0	1	755,	0,
3	44914817	44915505	hsa_retrop28915.0	0	+	44914817	44915505	0	1	688,	0,
3	49354638	49354897	hsa_retrom28068.0	0	-	49354638	49354897	0	1	259,	0,
3	61728163	61728588	hsa_retrom28206.0	0	-	61728163	61728588	0	1	425,	0,
3	93776816	93781808	hsa_retrom28363.0	0	-	93776816	93781808	0	2	3634,219,	0,4773,
3	94654300	94657083	hsa_retrom28393.0	0	-	94654300	94657083	0	1	2783,	0,
3	94890743	94891269	hsa_retrop29306.0	0	+	94890743	94891269	0	1	526,	0,
3	101295293	101296519	hsa_retrom28434.0	0	-	101295293	101296519	0	1	1226,	0,
3	101429865	101432101	hsa_retrop29554.0	0	+	101429865	101432101	0	1	2236,	0,
3	107046611	107048454	hsa_retrom28460.0	0	-	107046611	107048454	0	1	1843,	0,
3	113081423	113081713	hsa_retrom28536.0	0	-	113081423	113081713	0	1	290,	0,
3	119354458	119355112	hsa_retrom28592.0	0	-	119354458	119355112	0	1	654,	0,
3	128181283	128182790	hsa_retrom28645.0	0	-	128181283	128182790	0	1	1507,	0,
3	156868727	156881305	hsa_retrom28984.0	0	-	156868727	156881305	0	6	992,65,121,110,75,3725,	0,1238,2097,7927,8466,8853,
3	169483937	169487794	hsa_retrom29080.1	0	-	169483937	169487794	0	2	2201,686,	0,3171,
3	169484847	169487787	hsa_retrom29080.0	0	-	169484847	169487787	0	2	1291,679,	0,2261,
3	169663651	169664783	hsa_retrom29100.0	0	-	169663651	169664783	0	1	1132,	0,
3	196710738	196716541	hsa_retrom29346.0	0	-	196710738	196716541	0	2	328,2968,	0,2835,
3	197307095	197309294	hsairetrom26653.0	0	-	197307095	197309294	0	1	2199,	0,
4	6717555	6719189	hsairetrop27282.0	0	+	6717555	6719189	0	1	1634,	0,
4	41983788	41988414	hsa_retrop31280.0	0	+	41983788	41988414	0	1	4626,	0,
4	46736887	46737255	hsa_retrom29711.0	0	-	46736887	46737255	0	1	368,	0,
4	47708586	47708997	hsa_retrop31308.0	0	+	47708586	47708997	0	1	411,	0,
4	47937992	48012910	hsairetrom27068.1	0	-	47937992	48012910	0	10	1854,107,108,108,42,63,117,121,108,100,	0,4787,6065,7205,7395,13857,15377,16607,45417,74818,
4	54851318	54853544	hsa_retrom29730.0	0	-	54851318	54853544	0	1	2226,	0,
4	66439293	66439656	hsa_retrop31404.0	0	+	66439293	66439656	0	1	363,	0,
4	80238285	80247211	hsa_retrom29895.0	0	-	80238285	80247211	0	2	660,882,	0,8044,
4	80327512	80329312	hsa_retrom29909.0	0	-	80327512	80329312	0	1	1800,	0,
4	91759686	91760191	hsairetrom27435.0	0	-	91759686	91760191	0	1	505,	0,
4	93742760	93744067	hsa_retrom29965.0	0	-	93742760	93744067	0	1	1307,	0,
4	96761274	96762599	hsa_retrop31666.0	0	+	96761274	96762599	0	1	1325,	0,
4	114822900	114900248	hsa_retrom30127.1	0	-	114822900	114900248	0	2	1931,656,	0,76692,
4	114822900	114901315	hsa_retrom30127.0	0	-	114822900	114901315	0	3	468,1367,1723,	0,564,76692,
4	118004811	118006672	hsa_retrom30145.1	0	-	118004811	118006672	0	1	1861,	0,
4	120314356	120316752	hsa_retrom30179.1	0	-	120314356	120316752	0	1	2396,	0,
4	120329415	120331210	hsairetrom27743.0	0	-	120329415	120331210	0	1	1795,	0,
4	144480630	144493788	hsairetrop28636.0	0	+	144480630	144493788	0	2	671,223,	0,12935,
4	159193156	159200515	hsa_retrop32129.2	0	+	159193156	159200515	0	2	169,2586,	0,4773,
4	164392304	164394934	hsa_retrom30469.0	0	-	164392304	164394934	0	1	2630,	0,
4	166198968	166200801	hsa_retrom30504.0	0	-	166198968	166200801	0	1	1833,	0,
4	183958876	183960555	hsa_retrop32274.0	0	+	183958876	183960555	0	1	1679,	0,
4	188924445	188925056	hsairetrop28971.0	0	+	188924445	188925056	0	1	611,	0,
5	14652049	14653455	hsa_retrom30760.0	0	-	14652049	14653455	0	1	1406,	0,
5	17353857	17354415	hsa_retrom30792.0	0	-	17353857	17354415	0	1	558,	0,
5	17354304	17354415	hsa_retrom30792.1	0	+	17354304	17354415	0	1	111,	0,
5	21481352	21484100	hsairetrom28519.0	0	-	21481352	21484100	0	1	2748,	0,
5	33162302	33162618	hsa_retrop32578.0	0	+	33162302	33162618	0	1	316,	0,
5	34189912	34193851	hsairetrop29287.0	0	+	34189912	34193851	0	1	3939,	0,
5	55800592	55800891	hsa_retrom31238.0	0	-	55800592	55800891	0	1	299,	0,
5	68609250	68609664	hsa_retrom31387.0	0	-	68609250	68609664	0	1	414,	0,
5	68660646	68665044	hsa_retrom31396.0	0	-	68660646	68665044	0	3	935,93,53,	0,1683,4345,
5	78579904	78580568	hsa_retrom31537.0	0	-	78579904	78580568	0	1	664,	0,
5	79627393	79628352	hsa_retrom31563.0	0	-	79627393	79628352	0	1	959,	0,
5	121187598	121188514	hsa_retrop33264.0	0	+	121187598	121188514	0	1	916,	0,
5	137086186	137090044	hsa_retrom32037.0	0	-	137086186	137090044	0	1	3858,	0,
5	140682237	140683674	hsa_retrom32068.0	0	-	140682237	140683674	0	1	1437,	0,
5	140698131	140700331	hsa_retrom32073.0	0	-	140698131	140700331	0	1	2200,	0,
5	141275766	141276201	hsa_retrom32083.0	0	-	141275766	141276201	0	1	435,	0,
5	149311544	149312342	hsa_retrom32131.1	0	-	149311544	149312342	0	1	798,	0,
5	149311569	149312337	hsa_retrom32131.0	0	-	149311569	149312337	0	1	768,	0,
5	154393339	154397635	hsa_retrop34555.0	0	+	154393339	154397635	0	1	4296,	0,
5	156277581	156278836	hsa_retrop34562.0	0	+	156277581	156278836	0	1	1255,	0,
5	167956607	167957617	hsa_retrop34597.0	0	+	167956607	167957617	0	1	1010,	0,
5	177482306	177483127	hsa_retrop34695.0	0	+	177482306	177483127	0	1	821,	0,
5	177612444	177614377	hsa_retrom32294.0	0	-	177612444	177614377	0	1	1933,	0,
5	179105572	179121890	hsa_retrop34768.0	0	+	179105572	179121890	0	2	206,584,	0,15734,
5	179106050	179121890	hsa_retrop34768.1	0	+	179106050	179121890	0	2	235,584,	0,15256,
5	179211058	179212365	hsa_retrop34771.0	0	+	179211058	179212365	0	1	1307,	0,
6	3849634	3851483	hsa_retrop34844.0	0	+	3849634	3851483	0	2	86,1461,	0,388,
6	4688344	4703995	hsa_retrop34854.1	0	+	4688344	4703995	0	2	201,1325,	0,14326,
6	4702670	4703989	hsa_retrop34854.0	0	+	4702670	4703989	0	1	1319,	0,
6	7986317	7989924	hsa_retrop34887.0	0	+	7986317	7989924	0	1	3607,	0,
6	22569771	22571888	hsairetrop31617.0	0	+	22569771	22571888	0	1	2117,	0,
6	49753384	49754991	hsa_retrom34525.1	0	-	49753384	49754991	0	1	1607,	0,
6	49753687	49754989	hsa_retrom34525.0	0	-	49753687	49754989	0	1	1302,	0,
6	72294395	72295698	hsa_retrop36749.0	0	+	72294395	72295698	0	1	1303,	0,
6	73994360	74005144	hsa_retrop36763.0	0	+	73994360	74005144	0	2	97,4889,	0,5895,
6	74000233	74005144	hsa_retrop36763.1	0	+	74000233	74005144	0	1	4911,	0,
6	92525291	92526246	hsa_retrom34887.0	0	-	92525291	92526246	0	1	955,	0,
6	100023545	100024353	hsa_retrop36942.0	0	+	100023545	100024353	0	1	808,	0,
6	143663501	143664827	hsa_retrop37247.0	0	+	143663501	143664827	0	1	1326,	0,
6	160131559	160135879	hsa_retrom35444.0	0	-	160131559	160135879	0	1	4320,	0,
6	166478086	166478986	hsa_retrop37417.0	0	+	166478086	166478986	0	1	900,	0,
6	168687537	168689994	hsa_retrom35490.0	0	-	168687537	168689994	0	1	2457,	0,
7	4898836	4901560	hsa_retrom35513.0	0	-	4898836	4901560	0	1	2724,	0,
7	6530374	6532196	hsa_retrom35552.0	0	-	6530374	6532196	0	1	1822,	0,
7	12510880	12512186	hsairetrop34028.0	0	+	12510880	12512186	0	1	1306,	0,
7	18066460	18067443	hsa_retrom35644.0	0	-	18066460	18067443	0	1	983,	0,
7	22550230	22551558	hsa_retrom35675.0	0	-	22550230	22551558	0	1	1328,	0,
7	23530122	23531014	hsa_retrop37762.0	0	+	23530122	23531014	0	1	892,	0,
7	23623065	23626137	hsa_retrom35690.0	0	-	23623065	23626137	0	1	3072,	0,
7	38725046	38726629	hsa_retrom35901.0	0	-	38725046	38726629	0	2	766,720,	0,863,
7	44507599	44507883	hsa_retrop37891.0	0	+	44507599	44507883	0	1	284,	0,
7	48964220	48967049	hsa_retrop37919.0	0	+	48964220	48967049	0	1	2829,	0,
7	56636290	56636627	hsa_retrom36036.0	0	-	56636290	56636627	0	1	337,	0,
7	62809534	62810425	hsa_retrom36070.0	0	-	62809534	62810425	0	1	891,	0,
7	63391419	63392850	hsa_retrop38049.0	0	+	63391419	63392850	0	1	1431,	0,
7	63894140	63895801	hsa_retrop38095.0	0	+	63894140	63895801	0	1	1661,	0,
7	66018779	66057356	hsa_retrom36148.0	0	-	66018779	66057356	0	4	1045,166,178,113,	0,19592,22962,38464,
7	73183339	73184565	hsairetrom33544.0	0	-	73183339	73184565	0	1	1226,	0,
7	75956115	75988238	hsa_retrom36198.1	0	-	75956115	75988238	0	2	3435,200,	0,31923,
7	75956115	75988283	hsa_retrom36198.0	0	-	75956115	75988283	0	2	3435,245,	0,31923,
7	84613027	84613726	hsa_retrop38257.0	0	+	84613027	84613726	0	1	699,	0,
7	105222819	105223081	hsa_retrom36550.0	0	-	105222819	105223081	0	1	262,	0,
7	107269187	107271159	hsa_retrop38607.0	0	+	107269187	107271159	0	1	1972,	0,
7	122341900	122342906	hsa_retrom36634.0	0	-	122341900	122342906	0	1	1006,	0,
7	124121015	124121612	hsa_retrop38679.0	0	+	124121015	124121612	0	1	597,	0,
7	127666946	127671679	hsa_retrom36664.0	0	-	127666946	127671679	0	2	3847,714,	0,4019,
7	128766884	128767813	hsa_retrop38716.0	0	+	128766884	128767813	0	1	929,	0,
7	128766889	128767684	hsa_retrop38716.1	0	+	128766889	128767684	0	1	795,	0,
7	134331633	134364551	hsa_retrop38741.0	0	+	134331633	134364551	0	3	56,662,947,	0,14565,31971,
8	163326	163544	hsa_retrom37258.0	0	-	163326	163544	0	1	218,	0,
8	34731912	34732147	hsa_retrop39661.0	0	+	34731912	34732147	0	1	235,	0,
8	37553275	37557526	hsa_retrop39665.0	0	+	37553275	37557526	0	2	465,2864,	0,1387,
8	37604083	37605541	hsa_retrom37791.0	0	-	37604083	37605541	0	1	1458,	0,
8	57389401	57390656	hsa_retrom37967.0	0	-	57389401	57390656	0	1	1255,	0,
8	88883052	88886248	hsa_retrom38240.1	0	-	88883052	88886248	0	1	3196,	0,
8	125463068	125466668	hsairetrop37208.0	0	+	125463068	125466668	0	2	1515,1976,	0,1624,
8	125463068	125466668	hsairetrop37208.1	0	+	125463068	125466668	0	1	3600,	0,
9	6011055	6015616	hsa_retrom38978.1	0	-	6011055	6015616	0	1	4561,	0,
9	6011835	6015615	hsa_retrom38978.0	0	-	6011835	6015615	0	2	2521,144,	0,3636,
9	14921703	14922183	hsa_retrom39045.0	0	-	14921703	14922183	0	1	480,	0,
9	15527470	15527678	hsa_retrom39057.0	0	-	15527470	15527678	0	1	208,	0,
9	19049411	19050972	hsa_retrop40672.0	0	+	19049411	19050972	0	1	1561,	0,
9	21331041	21335369	hsa_retrom39281.1	0	-	21331041	21335369	0	1	4328,	0,
9	27325295	27529764	hsa_retrom39356.0	0	-	27325295	27529764	0	4	5319,203,616,212,	0,33736,129835,204257,
9	35449720	35450666	hsa_retrop40875.0	0	+	35449720	35450666	0	1	946,	0,
9	35971377	35972039	hsa_retrom39587.0	0	-	35971377	35972039	0	1	662,	0,
9	37885455	37887269	hsa_retrop40929.0	0	+	37885455	37887269	0	1	1814,	0,
9	38392743	38398254	hsa_retrop40951.0	0	+	38392743	38398254	0	2	61,2518,	0,2993,
9	69498846	69499952	hsa_retrom39881.0	0	-	69498846	69499952	0	1	1106,	0,
9	71394995	71396238	hsa_retrop41275.0	0	+	71394995	71396238	0	1	1243,	0,
9	71627438	71629004	hsa_retrom40066.0	0	-	71627438	71629004	0	1	1566,	0,
9	76089335	76091150	hsa_retrom40094.0	0	-	76089335	76091150	0	1	1815,	0,
9	79013614	79014497	hsa_retrop41295.0	0	+	79013614	79014497	0	1	883,	0,
9	95597995	95600415	hsairetrom37529.0	0	-	95597995	95600415	0	1	2420,	0,
9	104355079	104357249	hsa_retrom40349.0	0	-	104355079	104357249	0	1	2170,	0,
9	128358113	128359183	hsa_retrop42310.0	0	+	128358113	128359183	0	1	1070,	0,
9	135894846	135896485	hsa_retrop42371.0	0	+	135894846	135896485	0	1	1639,	0,
X	13336778	13337678	hsa_retrom40747.0	0	-	13336778	13337678	0	1	900,	0,
X	13336778	13338233	hsa_retrom40747.1	0	-	13336778	13338233	0	2	777,414,	0,1041,
X	13707262	13727734	hsa_retrop42534.0	0	+	13707262	13727734	0	2	145,895,	0,19577,
X	13707262	13727737	hsa_retrop42534.1	0	+	13707262	13727737	0	3	145,89,898,	0,14670,19577,
X	21874516	21876050	hsairetrop39424.0	0	+	21874516	21876050	0	1	1534,	0,
X	22291014	22292567	hsa_retrop42608.1	0	+	22291014	22292567	0	1	1553,	0,
X	22291104	22292561	hsa_retrop42608.0	0	+	22291104	22292561	0	1	1457,	0,
X	23018068	23020876	hsa_retrop42618.0	0	+	23018068	23020876	0	1	2808,	0,
X	24806705	24807097	hsa_retrom40807.0	0	-	24806705	24807097	0	1	392,	0,
X	31088957	31090212	hsa_retrom40893.0	0	-	31088957	31090212	0	1	1255,	0,
X	36980109	36981481	hsa_retrom40913.0	0	-	36980109	36981481	0	1	1372,	0,
X	37060955	37061861	hsa_retrom40921.0	0	-	37060955	37061861	0	1	906,	0,
X	44600592	44600893	hsa_retrop42889.0	0	+	44600592	44600893	0	1	301,	0,
X	45590469	45591236	hsa_retrop42902.0	0	+	45590469	45591236	0	1	767,	0,
X	51075734	51080332	hsa_retrop43181.0	0	+	51075734	51080332	0	2	577,1242,	0,3356,
X	51232939	51239636	hsa_retrom41243.1	0	-	51232939	51239636	0	2	1662,834,	0,5863,
X	51233968	51239636	hsa_retrom41243.0	0	-	51233968	51239636	0	2	633,834,	0,4834,
X	51486531	51488972	hsa_retrop43189.0	0	+	51486531	51488972	0	1	2441,	0,
X	56589613	56593933	hsairetrop40022.1	0	+	56589613	56593933	0	1	4320,	0,
X	57017278	57021458	hsa_retrom41358.0	0	-	57017278	57021458	0	1	4180,	0,
X	57017278	57021967	hsa_retrom41358.1	0	-	57017278	57021967	0	2	4104,319,	0,4370,
X	57146130	57147966	hsa_retrom41384.0	0	-	57146130	57147966	0	2	937,241,	0,1595,
X	57617616	57623908	hsairetrop40030.0	0	+	57617616	57623908	0	1	6292,	0,
X	62568867	62571261	hsa_retrom41451.0	0	-	62568867	62571261	0	1	2394,	0,
X	69282264	69284200	hsa_retrop43423.0	0	+	69282264	69284200	0	1	1936,	0,
X	73524042	73524714	hsa_retrop43557.1	0	+	73524042	73524714	0	1	672,	0,
X	74959842	74966886	hsa_retrom41695.0	0	-	74959842	74966886	0	1	7044,	0,
X	84189137	84189887	hsa_retrop43672.0	0	+	84189137	84189887	0	2	224,387,	0,363,
X	84189158	84189887	hsa_retrop43672.1	0	+	84189158	84189887	0	1	729,	0,
X	100663217	100669060	hsa_retrop43829.0	0	+	100663217	100669060	0	2	90,2137,	0,3706,
X	100663217	100669060	hsa_retrop43829.1	0	+	100663217	100669060	0	2	78,2137,	0,3706,
X	102930462	102941605	hsairetrom39463.1	0	-	102930462	102941605	0	4	1517,153,90,47,	0,2964,9636,11096,
X	102930463	102941604	hsairetrom39463.0	0	-	102930463	102941604	0	5	1516,102,49,90,46,	0,2963,9145,9635,11095,
X	102930463	102942948	hsairetrom39463.3	0	-	102930463	102942948	0	4	1516,102,90,32,	0,2963,9635,12453,
X	102930466	102942948	hsairetrom39463.2	0	-	102930466	102942948	0	3	1513,90,32,	0,9632,12450,
X	103077264	103087148	hsa_retrom42081.0	0	-	103077264	103087148	0	3	3492,74,159,	0,4670,9725,
X	125297312	125299880	hsa_retrom42350.0	0	-	125297312	125299880	0	1	2568,	0,
X	125684987	125686454	hsa_retrom42356.0	0	-	125684987	125686454	0	2	103,1277,	0,190,
X	131337077	131352040	hsa_retrom42405.0	0	-	131337077	131352040	0	5	2538,313,161,529,97,	0,11084,13946,14228,14866,
X	132350841	132352355	hsa_retrom42416.0	0	-	132350841	132352355	0	1	1514,	0,
X	133655709	133657063	hsa_retrop44213.0	0	+	133655709	133657063	0	1	1354,	0,
X	135886498	135890252	hsa_retrom42530.0	0	-	135886498	135890252	0	1	3754,	0,
X	139173796	139175004	hsa_retrop44318.0	0	+	139173796	139175004	0	1	1208,	0,
X	147133704	147133985	hsa_retrop44398.0	0	+	147133704	147133985	0	1	281,	0,

## Sheet: Chimpanzee
# Supplemental Table S11: Retrocopy transcripts in chimpanzee (BED12 format)
Chromosome	Start	End	Transcript_ID	Score (not defined)	Strand	Thick Start (not defined)	Thick End (not defined)	Item_RGB (not defined)	Exon_count	Exon_sizes	Exon_starts
1	1587333	1592374	ptr_retrop10258.0	0	+	1587333	1592374	0	1	5041,	0,
1	20498022	20499144	ptriretrop38493.0	0	+	20498022	20499144	0	1	1122,	0,
1	25316487	25316707	ptr_retrom09967.0	0	-	25316487	25316707	0	1	220,	0,
1	25880892	25881935	ptriretrop38630.0	0	+	25880892	25881935	0	1	1043,	0,
1	39783978	39785542	ptr_retrop10375.0	0	+	39783978	39785542	0	2	787,776,	0,788,
1	48798361	48799686	ptriretrop39158.0	0	+	48798361	48799686	0	1	1325,	0,
1	51625961	51626146	ptriretrom38367.0	0	-	51625961	51626146	0	1	185,	0,
1	53202426	53202867	ptriretrom38399.0	0	-	53202426	53202867	0	1	441,	0,
1	53886669	53888062	ptr_retrom10103.0	0	-	53886669	53888062	0	1	1393,	0,
1	59106138	59108041	ptr_retrom10110.0	0	-	59106138	59108041	0	1	1903,	0,
1	89777097	89789475	ptriretrom38759.0	0	-	89777097	89789475	0	3	3270,100,57,	0,7834,12321,
1	92292727	92294568	ptriretrom38807.0	0	-	92292727	92294568	0	1	1841,	0,
1	100514801	100516489	ptriretrop39712.0	0	+	100514801	100516489	0	1	1688,	0,
1	104581917	104583391	ptr_retrop10515.0	0	+	104581917	104583391	0	1	1474,	0,
1	109725273	109725730	ptr_retrop10523.0	0	+	109725273	109725730	0	1	457,	0,
1	110447541	110448364	ptriretrom38981.0	0	-	110447541	110448364	0	1	823,	0,
1	112085671	112086318	ptr_retrom10205.0	0	-	112085671	112086318	0	1	647,	0,
1	112419269	112419847	ptr_retrom10209.0	0	-	112419269	112419847	0	1	578,	0,
1	127979350	127983264	ptriretrom39332.1	0	-	127979350	127983264	0	1	3914,	0,
1	128011394	128017217	ptriretrom39341.0	0	-	128011394	128017217	0	1	5823,	0,
1	128747616	128756410	ptr_retrop10677.0	0	+	128747616	128756410	0	2	330,1392,	0,7402,
1	128754808	128756410	ptr_retrop10677.1	0	+	128754808	128756410	0	1	1602,	0,
1	138655573	138655777	ptriretrop40657.0	0	+	138655573	138655777	0	1	204,	0,
1	139752417	139752854	ptriretrop40705.0	0	+	139752417	139752854	0	1	437,	0,
1	144025495	144025577	ptriretrop40764.0	0	+	144025495	144025577	0	1	82,	0,
1	147332070	147332411	ptriretrop40871.0	0	+	147332070	147332411	0	1	341,	0,
1	179613690	179614458	ptr_retrop10836.0	0	+	179613690	179614458	0	1	768,	0,
1	182768901	182769382	ptriretrom40334.0	0	-	182768901	182769382	0	1	481,	0,
1	188329002	188330341	ptriretrop41340.0	0	+	188329002	188330341	0	1	1339,	0,
1	197036785	197036868	ptriretrom40523.0	0	-	197036785	197036868	0	1	83,	0,
1	199415656	199416629	ptr_retrop10871.0	0	+	199415656	199416629	0	1	973,	0,
1	201712836	201714492	ptriretrom40599.0	0	-	201712836	201714492	0	1	1656,	0,
1	207787149	207787457	ptr_retrop10924.0	0	+	207787149	207787457	0	1	308,	0,
1	207837485	207846668	ptriretrop41627.0	0	+	207837485	207846668	0	2	269,3376,	0,5807,
1	210139386	210139956	ptriretrop41652.0	0	+	210139386	210139956	0	1	570,	0,
1	215790684	215793258	ptr_retrop10944.0	0	+	215790684	215793258	0	1	2574,	0,
1	220988658	220990827	ptr_retrom10757.0	0	-	220988658	220990827	0	1	2169,	0,
1	224655095	224656515	ptriretrom40948.0	0	-	224655095	224656515	0	1	1420,	0,
1	224655112	224656106	ptriretrom40948.1	0	-	224655112	224656106	0	1	994,	0,
1	226658349	226658947	ptriretrop41887.0	0	+	226658349	226658947	0	1	598,	0,
1	228064032	228065698	ptriretrop42170.0	0	+	228064032	228065698	0	1	1666,	0,
10	5603283	5604567	ptr_retrop05221.0	0	+	5603283	5604567	0	1	1284,	0,
10	5945645	5948710	ptr_retrom05426.0	0	-	5945645	5948710	0	1	3065,	0,
10	5945647	5974794	ptr_retrom05426.1	0	-	5945647	5974794	0	7	1716,191,162,109,43,395,853,	0,17369,22256,23219,24971,27100,28294,
10	21971678	21972426	ptriretrom18596.0	0	-	21971678	21972426	0	1	748,	0,
10	23492296	23492714	ptr_retrop05238.0	0	+	23492296	23492714	0	1	418,	0,
10	43239056	43247716	ptr_retrom05511.0	0	-	43239056	43247716	0	2	1921,49,	0,8611,
10	43379548	43381642	ptr_retrom05512.0	0	-	43379548	43381642	0	1	2094,	0,
10	46271764	46272770	ptriretrop18583.0	0	+	46271764	46272770	0	1	1006,	0,
10	50115871	50119874	ptriretrom18906.0	0	-	50115871	50119874	0	1	4003,	0,
10	56550993	56551587	ptriretrom18931.0	0	-	56550993	56551587	0	1	594,	0,
10	61599018	61599823	ptriretrop18657.0	0	+	61599018	61599823	0	1	805,	0,
10	61971950	61973005	ptriretrom18969.0	0	-	61971950	61973005	0	1	1055,	0,
10	66311694	66312166	ptr_retrop05294.0	0	+	66311694	66312166	0	1	472,	0,
10	72012744	72015674	ptr_retrom05558.0	0	-	72012744	72015674	0	1	2930,	0,
10	72308283	72310847	ptriretrop18849.1	0	+	72308283	72310847	0	2	1245,1316,	0,1248,
10	76389082	76391235	ptr_retrom05573.0	0	-	76389082	76391235	0	1	2153,	0,
10	78144306	78144758	ptr_retrop05345.0	0	+	78144306	78144758	0	1	452,	0,
10	79591197	79591630	ptr_retrom05576.0	0	-	79591197	79591630	0	1	433,	0,
10	81702403	81703062	ptr_retrom05582.0	0	-	81702403	81703062	0	1	659,	0,
10	83957792	83958337	ptriretrop18957.1	0	+	83957792	83958337	0	1	545,	0,
10	83957959	83958337	ptriretrop18957.0	0	+	83957959	83958337	0	1	378,	0,
10	91658670	91658815	ptriretrop19060.0	0	+	91658670	91658815	0	1	145,	0,
10	91759787	91760261	ptriretrop19071.0	0	+	91759787	91760261	0	1	474,	0,
10	93517141	93519155	ptr_retrom05607.0	0	-	93517141	93519155	0	1	2014,	0,
10	99296129	99297423	ptr_retrom05618.0	0	-	99296129	99297423	0	1	1294,	0,
10	102483392	102484296	ptriretrop19218.0	0	+	102483392	102484296	0	1	904,	0,
10	109322517	109322820	ptriretrom19538.0	0	-	109322517	109322820	0	1	303,	0,
10	109322517	109322943	ptriretrom19538.1	0	-	109322517	109322943	0	1	426,	0,
11	3725683	3739173	ptr_retrom04521.0	0	-	3725683	3739173	0	3	20,539,38,	0,21,13452,
11	6272794	6278912	ptr_retrom04820.0	0	-	6272794	6278912	0	1	6118,	0,
11	6847348	6848341	ptriretrop16360.0	0	+	6847348	6848341	0	1	993,	0,
11	31246414	31248196	ptriretrop16601.0	0	+	31246414	31248196	0	1	1782,	0,
11	33754680	33755440	ptriretrom16786.0	0	-	33754680	33755440	0	1	760,	0,
11	59472122	59473786	ptriretrop17018.1	0	+	59472122	59473786	0	1	1664,	0,
11	67331372	67332169	ptriretrop17289.0	0	+	67331372	67332169	0	1	797,	0,
11	72513287	72513623	ptr_retrom05121.0	0	-	72513287	72513623	0	1	336,	0,
11	75541033	75541171	ptr_retrom05134.0	0	-	75541033	75541171	0	1	138,	0,
11	81127652	81127970	ptriretrop17573.0	0	+	81127652	81127970	0	1	318,	0,
11	101895675	101897129	ptr_retrop05057.0	0	+	101895675	101897129	0	1	1454,	0,
11	110080107	110122949	ptr_retrop05069.0	0	+	110080107	110122949	0	12	127,205,224,116,103,129,161,168,138,183,111,927,	0,3711,17624,18029,18803,23825,24728,26138,37880,38918,40365,41915,
11	111701322	111701743	ptriretrop17894.0	0	+	111701322	111701743	0	1	421,	0,
11	116933963	116939262	ptriretrom18048.0	0	-	116933963	116939262	0	1	5299,	0,
11	120914129	120930547	ptr_retrop05088.0	0	+	120914129	120930547	0	4	295,81,129,1519,	0,12136,13001,14899,
11	122785657	122787322	ptr_retrom05390.0	0	-	122785657	122787322	0	1	1665,	0,
11	123097287	123099650	ptr_retrop05197.0	0	+	123097287	123099650	0	1	2363,	0,
12	7781905	7784082	ptr_retrop05465.0	0	+	7781905	7784082	0	1	2177,	0,
12	9874421	9878566	ptriretrop19811.0	0	+	9874421	9878566	0	2	130,2189,	0,1956,
12	10717242	10718282	ptriretrop19829.0	0	+	10717242	10718282	0	1	1040,	0,
12	19437284	19437818	ptriretrop19989.0	0	+	19437284	19437818	0	1	534,	0,
12	22995915	22997165	ptr_retrop05531.0	0	+	22995915	22997165	0	1	1250,	0,
12	23000143	23000963	ptr_retrop05532.0	0	+	23000143	23000963	0	1	820,	0,
12	24872940	24879567	ptr_retrom05810.0	0	-	24872940	24879567	0	3	672,102,620,	0,5757,6007,
12	24872940	24879567	ptr_retrom05810.1	0	-	24872940	24879567	0	3	661,102,620,	0,5757,6007,
12	24872940	24881253	ptr_retrom05810.2	0	-	24872940	24881253	0	3	661,102,136,	0,5757,8177,
12	25448885	25450559	ptr_retrom05813.0	0	-	25448885	25450559	0	1	1674,	0,
12	27280051	27280503	ptriretrop20115.0	0	+	27280051	27280503	0	1	452,	0,
12	27536992	27537990	ptr_retrop05549.0	0	+	27536992	27537990	0	1	998,	0,
12	32842892	32843830	ptriretrom20407.0	0	-	32842892	32843830	0	1	938,	0,
12	40472219	40473951	ptriretrop20395.0	0	+	40472219	40473951	0	1	1732,	0,
12	50599058	50599869	ptriretrom20972.0	0	-	50599058	50599869	0	1	811,	0,
12	56639170	56640033	ptr_retrop05651.2	0	+	56639170	56640033	0	1	863,	0,
12	56639171	56640033	ptr_retrop05651.0	0	+	56639171	56640033	0	1	862,	0,
12	62714467	62715517	ptriretrom21109.0	0	-	62714467	62715517	0	1	1050,	0,
12	68406858	68406966	ptr_retrom05994.0	0	-	68406858	68406966	0	1	108,	0,
12	74411312	74414895	ptriretrop20790.0	0	+	74411312	74414895	0	1	3583,	0,
12	87063479	87063721	ptr_retrop05682.0	0	+	87063479	87063721	0	1	242,	0,
12	89662981	89665160	ptr_retrom06024.0	0	-	89662981	89665160	0	1	2179,	0,
12	93324134	93325018	ptriretrom21392.0	0	-	93324134	93325018	0	1	884,	0,
12	94772659	94773635	ptriretrop20985.0	0	+	94772659	94773635	0	2	179,796,	0,180,
12	95712224	95712416	ptriretrom21434.0	0	-	95712224	95712416	0	1	192,	0,
12	98724220	98727346	ptriretrom21470.0	0	-	98724220	98727346	0	1	3126,	0,
12	104616698	104618008	ptr_retrop05720.0	0	+	104616698	104618008	0	1	1310,	0,
12	106362459	106362650	ptriretrop21143.0	0	+	106362459	106362650	0	1	191,	0,
12	119735103	119752281	ptr_retrop05748.0	0	+	119735103	119752281	0	3	720,64,2303,	0,8080,14875,
12	120877305	120877545	ptr_retrop05753.0	0	+	120877305	120877545	0	1	240,	0,
12	131324668	131325342	ptriretrop21459.0	0	+	131324668	131325342	0	1	674,	0,
12	133118547	133123790	ptriretrom21808.0	0	-	133118547	133123790	0	1	5243,	0,
13	18090859	18092749	ptr_retrop04040.0	0	+	18090859	18092749	0	1	1890,	0,
13	18906220	18906770	ptriretrop15004.0	0	+	18906220	18906770	0	1	550,	0,
13	20833874	20835633	ptr_retrop04052.0	0	+	20833874	20835633	0	1	1759,	0,
13	20873052	20875946	ptriretrop15057.0	0	+	20873052	20875946	0	1	2894,	0,
13	22223879	22224483	ptr_retrom04336.0	0	-	22223879	22224483	0	1	604,	0,
13	22444486	22445643	ptr_retrop04055.0	0	+	22444486	22445643	0	1	1157,	0,
13	24635516	24637441	ptr_retrop04066.0	0	+	24635516	24637441	0	1	1925,	0,
13	27207649	27210178	ptriretrop15155.1	0	+	27207649	27210178	0	2	1108,558,	0,1971,
13	27208082	27210178	ptriretrop15155.0	0	+	27208082	27210178	0	2	675,558,	0,1538,
13	30042093	30043798	ptr_retrop04089.0	0	+	30042093	30043798	0	1	1705,	0,
13	36732870	36733534	ptr_retrom04388.0	0	-	36732870	36733534	0	1	664,	0,
13	45066862	45067863	ptr_retrom04393.0	0	-	45066862	45067863	0	1	1001,	0,
13	47613214	47614001	ptr_retrom04396.0	0	-	47613214	47614001	0	1	787,	0,
13	51748942	51771025	ptr_retrop04117.0	0	+	51748942	51771025	0	2	55,6147,	0,15936,
13	51748942	51771025	ptr_retrop04117.1	0	+	51748942	51771025	0	3	55,231,6147,	0,6498,15936,
13	51748942	51771025	ptr_retrop04117.2	0	+	51748942	51771025	0	4	55,231,932,6147,	0,6498,11611,15936,
13	52275995	52291411	ptriretrop15393.0	0	+	52275995	52291411	0	5	93,73,142,141,564,	0,4849,9726,11243,14852,
14	22116142	22117006	ptriretrop12539.0	0	+	22116142	22117006	0	1	864,	0,
14	42993006	42993519	ptriretrom12390.0	0	-	42993006	42993519	0	1	513,	0,
14	45543562	45544434	ptriretrom12424.0	0	-	45543562	45544434	0	1	872,	0,
14	48472227	48479146	ptriretrom12450.0	0	-	48472227	48479146	0	1	6919,	0,
14	48520817	48522719	ptriretrom12454.0	0	-	48520817	48522719	0	2	437,45,	0,1857,
14	48807806	48812428	ptr_retrop03681.0	0	+	48807806	48812428	0	1	4622,	0,
14	54272633	54273018	ptr_retrop03704.0	0	+	54272633	54273018	0	1	385,	0,
14	59231225	59231785	ptriretrop13112.0	0	+	59231225	59231785	0	1	560,	0,
14	60323055	60324030	ptr_retrom03743.0	0	-	60323055	60324030	0	1	975,	0,
14	63623436	63625896	ptr_retrop03743.0	0	+	63623436	63625896	0	1	2460,	0,
14	65112601	65113675	ptriretrom12716.0	0	-	65112601	65113675	0	1	1074,	0,
14	65112602	65113402	ptriretrom12716.1	0	-	65112602	65113402	0	1	800,	0,
14	81461063	81462220	ptr_retrom03793.0	0	-	81461063	81462220	0	1	1157,	0,
14	82082156	82082640	ptriretrom12995.0	0	-	82082156	82082640	0	1	484,	0,
14	101378422	101378843	ptr_retrop03808.0	0	+	101378422	101378843	0	1	421,	0,
14	102848539	102849567	ptr_retrop03811.0	0	+	102848539	102849567	0	2	209,407,	0,621,
15	21116407	21117964	ptr_retrop03157.0	0	+	21116407	21117964	0	1	1557,	0,
15	26260145	26260846	ptriretrom10832.1	0	-	26260145	26260846	0	1	701,	0,
15	26260485	26260844	ptriretrom10832.0	0	-	26260485	26260844	0	1	359,	0,
15	31179168	31180446	ptr_retrom03376.0	0	-	31179168	31180446	0	1	1278,	0,
15	31329635	31330913	ptr_retrop03172.0	0	+	31329635	31330913	0	1	1278,	0,
15	31910951	31911694	ptr_retrop03176.0	0	+	31910951	31911694	0	1	743,	0,
15	37775646	37777087	ptriretrom10999.0	0	-	37775646	37777087	0	2	1095,164,	0,1277,
15	37775646	37777641	ptriretrom10999.1	0	-	37775646	37777641	0	4	1095,59,146,323,	0,1277,1525,1672,
15	40989099	40989310	ptriretrom11099.0	0	-	40989099	40989310	0	1	211,	0,
15	49748975	49749224	ptriretrop11310.0	0	+	49748975	49749224	0	1	249,	0,
15	56556472	56558060	ptr_retrop03246.0	0	+	56556472	56558060	0	1	1588,	0,
15	69627521	69627975	ptriretrop11562.0	0	+	69627521	69627975	0	1	454,	0,
15	72763525	72763607	ptriretrom11532.0	0	-	72763525	72763607	0	1	82,	0,
15	80294458	80295900	ptr_retrom03507.0	0	-	80294458	80295900	0	1	1442,	0,
15	86541038	86546594	ptr_retrom03520.1	0	-	86541038	86546594	0	1	5556,	0,
15	87039407	87040101	ptriretrom11796.0	0	-	87039407	87040101	0	1	694,	0,
15	87704368	87704642	ptr_retrom03524.0	0	-	87704368	87704642	0	1	274,	0,
15	90120941	90121370	ptr_retrom03545.0	0	-	90120941	90121370	0	1	429,	0,
16	3526548	3526854	ptr_retrop02965.0	0	+	3526548	3526854	0	1	306,	0,
16	4616117	4616361	ptriretrom09821.0	0	-	4616117	4616361	0	1	244,	0,
16	17855527	17855693	ptriretrop10106.0	0	+	17855527	17855693	0	1	166,	0,
16	30579146	30581351	ptriretrom10087.0	0	-	30579146	30581351	0	1	2205,	0,
16	30966787	30967836	ptr_retrom03218.0	0	-	30966787	30967836	0	1	1049,	0,
16	32012897	32013511	ptr_retrop03002.0	0	+	32012897	32013511	0	1	614,	0,
16	57362635	57363890	ptriretrom10368.0	0	-	57362635	57363890	0	1	1255,	0,
16	74058020	74059327	ptr_retrop03107.0	0	+	74058020	74059327	0	1	1307,	0,
16	75665539	75665921	ptr_retrom03311.0	0	-	75665539	75665921	0	1	382,	0,
16	76859546	76860228	ptr_retrop03109.0	0	+	76859546	76860228	0	1	682,	0,
16	81552783	81556055	ptr_retrom03320.0	0	-	81552783	81556055	0	2	2567,139,	0,3133,
16	81552783	81566609	ptr_retrom03320.3	0	-	81552783	81566609	0	3	2567,94,85,	0,3133,13741,
17	14624804	14632527	ptriretrop08764.0	0	+	14624804	14632527	0	3	88,142,2409,	0,633,5314,
17	14630117	14632527	ptriretrop08764.1	0	+	14630117	14632527	0	1	2410,	0,
17	14850955	14851260	ptr_retrom02988.0	0	-	14850955	14851260	0	1	305,	0,
17	21551655	21554140	ptr_retrop02778.1	0	+	21551655	21554140	0	1	2485,	0,
17	21962746	21968390	ptr_retrom03015.0	0	-	21962746	21968390	0	4	2529,122,196,243,	0,4015,4700,5401,
17	24960273	24961893	ptriretrom08870.0	0	-	24960273	24961893	0	1	1620,	0,
17	26977039	26977955	ptriretrom08895.0	0	-	26977039	26977955	0	1	916,	0,
17	28778935	28820097	ptr_retrop02805.0	0	+	28778935	28820097	0	3	33,118,1787,	0,884,39375,
17	28778990	28821689	ptr_retrop02805.1	0	+	28778990	28821689	0	4	52,118,152,3379,	0,829,32521,39320,
17	29740798	29742520	ptr_retrop02809.0	0	+	29740798	29742520	0	1	1722,	0,
17	36505349	36507398	ptriretrom09024.0	0	-	36505349	36507398	0	1	2049,	0,
17	36622875	36626633	ptriretrom09033.2	0	-	36622875	36626633	0	5	21,931,166,237,299,	0,22,1613,2428,3459,
17	36622876	36625939	ptriretrom09033.1	0	-	36622876	36625939	0	5	20,931,166,237,46,	0,21,1612,2427,3017,
17	36622878	36624029	ptriretrom09033.0	0	-	36622878	36624029	0	3	18,931,95,	0,19,1056,
17	37314863	37315201	ptr_retrom03055.0	0	-	37314863	37315201	0	1	338,	0,
17	38573610	38573893	ptr_retrop02819.0	0	+	38573610	38573893	0	1	283,	0,
17	52464204	52466336	ptr_retrop02840.0	0	+	52464204	52466336	0	1	2132,	0,
17	60343466	60344234	ptriretrom09369.0	0	-	60343466	60344234	0	1	768,	0,
17	62355048	62358169	ptr_retrom03109.0	0	-	62355048	62358169	0	1	3121,	0,
17	66888934	66891603	ptriretrom09483.0	0	-	66888934	66891603	0	1	2669,	0,
17	73362518	73363027	ptr_retrom03134.0	0	-	73362518	73363027	0	1	509,	0,
18	4707592	4710424	ptriretrom07749.0	0	-	4707592	4710424	0	1	2832,	0,
18	6699387	6701418	ptr_retrom02738.1	0	-	6699387	6701418	0	2	1439,89,	0,1942,
18	14608119	14609557	ptriretrom07856.0	0	-	14608119	14609557	0	1	1438,	0,
18	16138421	16139805	ptr_retrom02757.0	0	-	16138421	16139805	0	1	1384,	0,
18	31705815	31706461	ptriretrom08064.0	0	-	31705815	31706461	0	1	646,	0,
18	31705816	31706304	ptriretrom08064.1	0	-	31705816	31706304	0	1	488,	0,
18	35170448	35170964	ptriretrom08070.0	0	-	35170448	35170964	0	1	516,	0,
18	41963931	41965275	ptriretrop07959.0	0	+	41963931	41965275	0	1	1344,	0,
18	46074898	46076880	ptriretrop07998.0	0	+	46074898	46076880	0	1	1982,	0,
18	53216240	53218884	ptr_retrop02579.0	0	+	53216240	53218884	0	1	2644,	0,
18	63409403	63410425	ptriretrom08266.0	0	-	63409403	63410425	0	1	1022,	0,
19	197288	206692	ptriretrom06183.1	0	-	197288	206692	0	2	619,76,	0,9328,
19	12394540	12395769	ptriretrom06494.0	0	-	12394540	12395769	0	1	1229,	0,
19	12824459	12824755	ptr_retrop02227.0	0	+	12824459	12824755	0	1	296,	0,
19	14782238	14786459	ptr_retrop02233.0	0	+	14782238	14786459	0	1	4221,	0,
19	15099839	15100032	ptriretrop06465.0	0	+	15099839	15100032	0	1	193,	0,
19	15923273	15923861	ptr_retrom02480.0	0	-	15923273	15923861	0	1	588,	0,
19	20411704	20457257	ptr_retrop02319.0	0	+	20411704	20457257	0	5	212,127,96,155,1849,	0,23740,24718,43547,43704,
19	20455189	20457257	ptr_retrop02319.2	0	+	20455189	20457257	0	2	217,1849,	0,219,
19	20455251	20457257	ptr_retrop02319.1	0	+	20455251	20457257	0	2	155,1849,	0,157,
19	33881836	33882834	ptr_retrom02500.0	0	-	33881836	33882834	0	1	998,	0,
19	35039527	35039692	ptriretrom06832.0	0	-	35039527	35039692	0	1	165,	0,
19	35120447	35121666	ptr_retrop02341.0	0	+	35120447	35121666	0	1	1219,	0,
19	37781925	37782671	ptr_retrop02344.0	0	+	37781925	37782671	0	1	746,	0,
19	42860364	42861674	ptr_retrom02538.0	0	-	42860364	42861674	0	1	1310,	0,
19	42950762	42952210	ptriretrop06980.0	0	+	42950762	42952210	0	1	1448,	0,
19	44971321	44971625	ptr_retrop02373.0	0	+	44971321	44971625	0	1	304,	0,
19	47560484	47561175	ptr_retrom02554.0	0	-	47560484	47561175	0	2	148,542,	0,149,
19	54913679	54936137	ptr_retrom02589.0	0	-	54913679	54936137	0	2	2336,165,	0,22293,
19	57006159	57007752	ptriretrom07376.0	0	-	57006159	57007752	0	1	1593,	0,
19	57380318	57380831	ptriretrop07334.0	0	+	57380318	57380831	0	1	513,	0,
19	57730459	57731303	ptriretrop07358.0	0	+	57730459	57731303	0	1	844,	0,
19	58192908	58194902	ptriretrom07431.0	0	-	58192908	58194902	0	1	1994,	0,
19	62920643	62923841	ptr_retrop02488.0	0	+	62920643	62923841	0	1	3198,	0,
19	63101760	63103896	ptr_retrop02489.0	0	+	63101760	63103896	0	1	2136,	0,
20	3898008	3898210	ptr_retrop01988.0	0	+	3898008	3898210	0	1	202,	0,
20	16891857	16892678	ptriretrom05432.0	0	-	16891857	16892678	0	1	821,	0,
20	23480731	23484626	ptriretrop05594.0	0	+	23480731	23484626	0	2	222,755,	0,3140,
20	29050560	29076150	ptriretrop05662.0	0	+	29050560	29076150	0	8	1468,102,123,119,114,106,179,2390,	0,8230,8539,8768,18749,19534,22118,23200,
20	45382660	45383700	ptr_retrom02159.1	0	-	45382660	45383700	0	1	1040,	0,
20	45382660	45383939	ptr_retrom02159.0	0	-	45382660	45383939	0	1	1279,	0,
20	46772152	46772323	ptriretrom05971.0	0	-	46772152	46772323	0	1	171,	0,
20	50994498	50995526	ptriretrom06037.0	0	-	50994498	50995526	0	1	1028,	0,
20	52211688	52212010	ptr_retrop02087.0	0	+	52211688	52212010	0	1	322,	0,
20	54679886	54680092	ptr_retrom02178.0	0	-	54679886	54680092	0	1	206,	0,
21	15171127	15174130	ptr_retrom01857.0	0	-	15171127	15174130	0	3	748,283,90,	0,2085,2913,
21	15172966	15174129	ptr_retrom01857.1	0	-	15172966	15174129	0	2	529,89,	0,1074,
21	18040497	18041038	ptriretrop04234.0	0	+	18040497	18041038	0	1	541,	0,
21	21993776	21994565	ptriretrop04301.0	0	+	21993776	21994565	0	1	789,	0,
21	22235156	22236245	ptriretrop04313.0	0	+	22235156	22236245	0	2	524,563,	0,526,
22	17420408	17424040	ptriretrom04598.0	0	-	17420408	17424040	0	1	3632,	0,
22	19356156	19357405	ptriretrop04536.0	0	+	19356156	19357405	0	1	1249,	0,
22	21643535	21673266	ptriretrop04910.0	0	+	21643535	21673266	0	2	1148,1952,	0,27779,
22	21876735	21876828	ptriretrom04703.0	0	-	21876735	21876828	0	1	93,	0,
22	23098239	23098363	ptr_retrop01905.0	0	+	23098239	23098363	0	1	124,	0,
22	25555167	25555252	ptriretrom04769.0	0	-	25555167	25555252	0	1	85,	0,
22	29329827	29331264	ptr_retrom01972.0	0	-	29329827	29331264	0	1	1437,	0,
22	30632546	30645473	ptr_retrop01937.0	0	+	30632546	30645473	0	2	200,1457,	0,11470,
22	30730070	30730317	ptriretrop05096.0	0	+	30730070	30730317	0	1	247,	0,
22	39570565	39571927	ptriretrom05050.0	0	-	39570565	39571927	0	1	1362,	0,
22	39782513	39782634	ptr_retrop01960.1	0	+	39782513	39782634	0	1	121,	0,
22	39782550	39782820	ptr_retrop01960.0	0	+	39782550	39782820	0	1	270,	0,
22	40728422	40731154	ptr_retrom02027.0	0	-	40728422	40731154	0	1	2732,	0,
22	40866676	40870033	ptr_retrop01962.0	0	+	40866676	40870033	0	1	3357,	0,
2A	17549760	17550787	ptriretrop13925.0	0	+	17549760	17550787	0	1	1027,	0,
2A	17549775	17550753	ptriretrop13925.1	0	+	17549775	17550753	0	1	978,	0,
2A	20671354	20673628	ptr_retrop03855.0	0	+	20671354	20673628	0	1	2274,	0,
2A	20753998	20754358	ptriretrom13772.0	0	-	20753998	20754358	0	1	360,	0,
2A	25337280	25338052	ptriretrom13807.0	0	-	25337280	25338052	0	1	772,	0,
2A	39034414	39035733	ptriretrop14132.0	0	+	39034414	39035733	0	2	246,748,	0,571,
2A	47249841	47257005	ptriretrom14062.0	0	-	47249841	47257005	0	2	952,35,	0,7129,
2A	61790824	61793337	ptr_retrom04134.0	0	-	61790824	61793337	0	1	2513,	0,
2A	63005450	63006244	ptr_retrop03902.0	0	+	63005450	63006244	0	1	794,	0,
2A	71024551	71026109	ptr_retrop03911.1	0	+	71024551	71026109	0	1	1558,	0,
2A	85467037	85469926	ptr_retrop03937.0	0	+	85467037	85469926	0	1	2889,	0,
2A	85467037	85469926	ptr_retrop03937.1	0	+	85467037	85469926	0	2	1135,1457,	0,1432,
2A	88277191	88278232	ptriretrop14592.1	0	+	88277191	88278232	0	1	1041,	0,
2A	97305249	97309278	ptriretrop14680.0	0	+	97305249	97309278	0	1	4029,	0,
2A	97618405	97620081	ptr_retrom04283.0	0	-	97618405	97620081	0	1	1676,	0,
2A	101570345	101574157	ptriretrom14801.0	0	-	101570345	101574157	0	2	1420,1695,	0,2117,
2A	102576915	102577679	ptr_retrom04288.0	0	-	102576915	102577679	0	1	764,	0,
2A	102732275	102732794	ptriretrop14779.0	0	+	102732275	102732794	0	1	519,	0,
2A	109197645	109228475	ptriretrop14867.0	0	+	109197645	109228475	0	14	179,84,136,95,5152,171,93,179,205,102,161,274,335,2129,	0,269,3510,7200,8338,16809,17597,17977,20842,22240,26387,27248,27648,28701,
2B	120797082	120799699	ptriretrom41121.0	0	-	120797082	120799699	0	1	2617,	0,
2B	127219576	127219993	ptr_retrom10956.0	0	-	127219576	127219993	0	1	417,	0,
2B	131966791	131967373	ptr_retrom10989.0	0	-	131966791	131967373	0	1	582,	0,
2B	132028517	132029047	ptr_retrom10996.0	0	-	132028517	132029047	0	1	530,	0,
2B	132336530	132337899	ptr_retrom11002.0	0	-	132336530	132337899	0	1	1369,	0,
2B	141544919	141545199	ptr_retrop11414.0	0	+	141544919	141545199	0	1	280,	0,
2B	165790446	165798669	ptriretrom41581.0	0	-	165790446	165798669	0	2	1834,6388,	0,1835,
2B	171900105	171900968	ptriretrom41635.1	0	-	171900105	171900968	0	1	863,	0,
2B	171900105	171901250	ptriretrom41635.0	0	-	171900105	171901250	0	1	1145,	0,
2B	175232902	175233754	ptriretrop42714.0	0	+	175232902	175233754	0	1	852,	0,
2B	183896291	183897634	ptriretrom41815.0	0	-	183896291	183897634	0	1	1343,	0,
2B	194684022	194686772	ptr_retrom11112.0	0	-	194684022	194686772	0	1	2750,	0,
2B	205888872	205892855	ptr_retrom11129.0	0	-	205888872	205892855	0	1	3983,	0,
2B	206375469	206397930	ptriretrom42025.0	0	-	206375469	206397930	0	13	4089,122,94,74,192,124,158,121,138,57,5,32,62,	0,5792,7073,7826,8983,9482,11798,13055,16503,18732,20007,20639,22399,
2B	206964652	206964833	ptriretrom42028.0	0	-	206964652	206964833	0	1	181,	0,
2B	210958384	210961128	ptriretrom42090.0	0	-	210958384	210961128	0	1	2744,	0,
2B	236691794	236692019	ptriretrom42438.0	0	-	236691794	236692019	0	1	225,	0,
2B	237565835	237567710	ptr_retrop11572.0	0	+	237565835	237567710	0	1	1875,	0,
2B	239090041	239092383	ptriretrom42492.0	0	-	239090041	239092383	0	1	2342,	0,
2B	239090043	239092949	ptriretrom42492.1	0	-	239090043	239092949	0	2	1899,25,	0,2881,
3	28053125	28053725	ptr_retrop09866.0	0	+	28053125	28053725	0	1	600,	0,
3	37589432	37589824	ptriretrom35428.0	0	-	37589432	37589824	0	1	392,	0,
3	45548414	45549056	ptr_retrop09910.0	0	+	45548414	45549056	0	1	642,	0,
3	58833239	58833327	ptr_retrop09949.0	0	+	58833239	58833327	0	1	88,	0,
3	69381498	69381875	ptriretrop36734.0	0	+	69381498	69381875	0	1	377,	0,
3	97079953	97080440	ptr_retrom09599.0	0	-	97079953	97080440	0	1	487,	0,
3	97951451	97953795	ptriretrom36136.0	0	-	97951451	97953795	0	1	2344,	0,
3	102045337	102047089	ptriretrom36163.0	0	-	102045337	102047089	0	1	1752,	0,
3	104768559	104770721	ptr_retrom09608.0	0	-	104768559	104770721	0	1	2162,	0,
3	104886693	104887495	ptr_retrop10076.0	0	+	104886693	104887495	0	2	82,719,	0,83,
3	110611431	110614843	ptriretrom36229.0	0	-	110611431	110614843	0	1	3412,	0,
3	116687397	116688056	ptr_retrom09648.0	0	-	116687397	116688056	0	1	659,	0,
3	125781750	125783968	ptr_retrom09675.0	0	-	125781750	125783968	0	1	2218,	0,
3	127561505	127561605	ptriretrom36396.0	0	-	127561505	127561605	0	1	100,	0,
3	131876160	131877157	ptriretrom36440.0	0	-	131876160	131877157	0	1	997,	0,
3	132196160	132196853	ptr_retrom09683.0	0	-	132196160	132196853	0	1	693,	0,
3	153767602	153821487	ptriretrop37743.0	0	+	153767602	153821487	0	3	130,93,500,	0,27275,53385,
3	160549070	160550185	ptr_retrom09796.0	0	-	160549070	160550185	0	2	1046,68,	0,1047,
3	160883220	160899726	ptr_retrom09798.0	0	-	160883220	160899726	0	11	790,99,112,142,105,1963,121,148,110,75,4521,	0,1489,1687,2038,2268,2485,5242,9125,11059,11598,11985,
3	164240455	164241217	ptr_retrop10188.0	0	+	164240455	164241217	0	1	762,	0,
3	164358520	164359590	ptriretrop37874.0	0	+	164358520	164359590	0	1	1070,	0,
3	165113117	165114215	ptr_retrom09803.0	0	-	165113117	165114215	0	1	1098,	0,
3	173590387	173593934	ptr_retrom09818.1	0	-	173590387	173593934	0	2	1399,718,	0,2829,
3	173590495	173593934	ptr_retrom09818.0	0	-	173590495	173593934	0	2	1291,718,	0,2721,
3	179897885	179898956	ptr_retrom09836.0	0	-	179897885	179898956	0	1	1071,	0,
3	183217642	183219984	ptriretrom37219.0	0	-	183217642	183219984	0	1	2342,	0,
3	188180508	188181197	ptriretrop38064.1	0	+	188180508	188181197	0	1	689,	0,
3	188180701	188181194	ptriretrop38064.0	0	+	188180701	188181194	0	1	493,	0,
3	189467305	189467822	ptr_retrom09870.0	0	-	189467305	189467822	0	1	517,	0,
3	190961052	190961405	ptr_retrop10227.0	0	+	190961052	190961405	0	1	353,	0,
3	201622715	201624695	ptriretrom37467.0	0	-	201622715	201624695	0	1	1980,	0,
4	6872444	6873823	ptriretrop34174.0	0	+	6872444	6873823	0	1	1379,	0,
4	17059276	17061106	ptriretrop34309.0	0	+	17059276	17061106	0	1	1830,	0,
4	42050524	42052009	ptr_retrop09612.0	0	+	42050524	42052009	0	1	1485,	0,
4	47612616	47613169	ptriretrop34544.0	0	+	47612616	47613169	0	1	553,	0,
4	50632152	50633943	ptriretrop34565.0	0	+	50632152	50633943	0	1	1791,	0,
4	50714965	50723898	ptr_retrop09625.0	0	+	50714965	50723898	0	2	911,819,	0,8114,
4	61886135	61887191	ptriretrom33921.0	0	-	61886135	61887191	0	1	1056,	0,
4	61888589	61889276	ptriretrom33925.0	0	-	61888589	61889276	0	1	687,	0,
4	63239480	63240114	ptriretrom33941.1	0	-	63239480	63240114	0	1	634,	0,
4	63239480	63240657	ptriretrom33941.0	0	-	63239480	63240657	0	1	1177,	0,
4	68779584	68781331	ptriretrom34011.1	0	-	68779584	68781331	0	1	1747,	0,
4	68779879	68781325	ptriretrom34011.0	0	-	68779879	68781325	0	1	1446,	0,
4	73623744	73625151	ptriretrom34050.0	0	-	73623744	73625151	0	1	1407,	0,
4	76047532	76048578	ptr_retrop09659.0	0	+	76047532	76048578	0	1	1046,	0,
4	85154509	85328236	ptriretrop34886.0	0	+	85154509	85328236	0	3	75,55,368,	0,63710,173359,
4	111969061	111969427	ptr_retrom09248.0	0	-	111969061	111969427	0	1	366,	0,
4	116595561	116600471	ptr_retrom09260.0	0	-	116595561	116600471	0	3	429,1364,41,	0,525,4869,
4	116595561	116672849	ptr_retrom09260.1	0	-	116595561	116672849	0	2	1889,1262,	0,76026,
4	119726084	119727872	ptr_retrom09263.0	0	-	119726084	119727872	0	1	1788,	0,
4	121810187	121812977	ptriretrom34490.1	0	-	121810187	121812977	0	1	2790,	0,
4	121810192	121812016	ptriretrom34490.0	0	-	121810192	121812016	0	2	414,1323,	0,501,
4	131503810	131504431	ptr_retrom09303.0	0	-	131503810	131504431	0	1	621,	0,
4	146125381	146125949	ptriretrom34716.0	0	-	146125381	146125949	0	1	568,	0,
4	166584314	166586613	ptriretrom34871.0	0	-	166584314	166586613	0	1	2299,	0,
4	166584314	166586922	ptriretrom34871.1	0	-	166584314	166586922	0	1	2608,	0,
4	168333346	168335384	ptriretrom34902.0	0	-	168333346	168335384	0	1	2038,	0,
4	172161440	172163082	ptr_retrop09799.0	0	+	172161440	172163082	0	1	1642,	0,
4	186362294	186363082	ptriretrop35769.0	0	+	186362294	186363082	0	1	788,	0,
4	189525902	189528462	ptriretrom35075.0	0	-	189525902	189528462	0	1	2560,	0,
5	530327	530933	ptriretrom31416.0	0	-	530327	530933	0	1	606,	0,
5	14813431	14814237	ptr_retrom08652.0	0	-	14813431	14814237	0	1	806,	0,
5	17543295	17543855	ptr_retrom08654.0	0	-	17543295	17543855	0	1	560,	0,
5	35156782	35157857	ptr_retrop08718.0	0	+	35156782	35157857	0	1	1075,	0,
5	35528799	35529039	ptr_retrom08808.0	0	-	35528799	35529039	0	1	240,	0,
5	45859638	45864066	ptr_retrop08743.0	0	+	45859638	45864066	0	3	70,93,961,	0,2625,3467,
5	58952061	58952388	ptr_retrop08769.0	0	+	58952061	58952388	0	1	327,	0,
5	71550019	71550487	ptr_retrop08785.0	0	+	71550019	71550487	0	1	468,	0,
5	82035129	82035756	ptr_retrom08895.0	0	-	82035129	82035756	0	1	627,	0,
5	86169071	86169806	ptriretrom32365.0	0	-	86169071	86169806	0	1	735,	0,
5	90143687	90144379	ptr_retrop08820.0	0	+	90143687	90144379	0	1	692,	0,
5	93478456	93479319	ptriretrom32404.0	0	-	93478456	93479319	0	1	863,	0,
5	93881689	93882712	ptriretrop32673.0	0	+	93881689	93882712	0	1	1023,	0,
5	94053460	94053925	ptr_retrop08827.0	0	+	94053460	94053925	0	1	465,	0,
5	105820363	105820826	ptriretrom32470.0	0	-	105820363	105820826	0	1	463,	0,
5	122444625	122445262	ptr_retrop08877.0	0	+	122444625	122445262	0	1	637,	0,
5	135268688	135269076	ptriretrop33073.1	0	+	135268688	135269076	0	1	388,	0,
5	135268731	135269073	ptriretrop33073.0	0	+	135268731	135269073	0	1	342,	0,
5	138456016	138458837	ptriretrom32778.0	0	-	138456016	138458837	0	1	2821,	0,
5	141867917	141868766	ptriretrom32861.0	0	-	141867917	141868766	0	1	849,	0,
5	142050030	142051343	ptr_retrom08991.0	0	-	142050030	142051343	0	1	1313,	0,
5	142066031	142068234	ptriretrom32891.0	0	-	142066031	142068234	0	1	2203,	0,
5	142066033	142067541	ptriretrom32891.1	0	-	142066033	142067541	0	1	1508,	0,
5	150783694	150785055	ptriretrom32982.0	0	-	150783694	150785055	0	2	35,488,	0,873,
5	157724465	157725739	ptriretrop33779.0	0	+	157724465	157725739	0	1	1274,	0,
5	158727783	158729106	ptr_retrop09476.0	0	+	158727783	158729106	0	1	1323,	0,
5	161171605	161171721	ptriretrop33817.0	0	+	161171605	161171721	0	1	116,	0,
5	169539953	169540826	ptr_retrop09480.0	0	+	169539953	169540826	0	1	873,	0,
5	169558665	169589718	ptriretrom33148.0	0	-	169558665	169589718	0	7	9089,126,124,177,254,353,266,	0,10490,12853,15351,17510,20147,30787,
5	175723141	175723419	ptr_retrop09495.0	0	+	175723141	175723419	0	1	278,	0,
5	179165776	179167476	ptr_retrop09501.0	0	+	179165776	179167476	0	2	258,738,	0,962,
5	179295689	179297386	ptr_retrom09036.0	0	-	179295689	179297386	0	1	1697,	0,
5	180832499	180833269	ptr_retrop09511.0	0	+	180832499	180833269	0	1	770,	0,
5	180926406	180928102	ptr_retrop09512.0	0	+	180926406	180928102	0	1	1696,	0,
6	8044765	8047108	ptr_retrop07664.0	0	+	8044765	8047108	0	1	2343,	0,
6	11153216	11153876	ptriretrop29383.0	0	+	11153216	11153876	0	1	660,	0,
6	22791754	22792324	ptr_retrop07697.0	0	+	22791754	22792324	0	1	570,	0,
6	25396531	25397936	ptriretrop29549.1	0	+	25396531	25397936	0	1	1405,	0,
6	26487590	26490824	ptriretrop29699.0	0	+	26487590	26490824	0	2	91,2298,	0,936,
6	26488228	26490824	ptriretrop29699.1	0	+	26488228	26490824	0	1	2596,	0,
6	28457142	28462844	ptriretrop29948.0	0	+	28457142	28462844	0	2	41,393,	0,5309,
6	31067700	31072814	ptr_retrop08376.0	0	+	31067700	31072814	0	4	194,109,111,2045,	0,2266,2647,3069,
6	32110630	32113010	ptr_retrop08387.0	0	+	32110630	32113010	0	1	2380,	0,
6	33790408	33791087	ptriretrom29786.1	0	-	33790408	33791087	0	1	679,	0,
6	33790408	33791093	ptriretrom29786.0	0	-	33790408	33791093	0	1	685,	0,
6	50477049	50478669	ptr_retrom08390.0	0	-	50477049	50478669	0	1	1620,	0,
6	71468014	71468701	ptriretrop30785.0	0	+	71468014	71468701	0	3	112,384,189,	0,113,498,
6	71890282	71891162	ptr_retrop08463.0	0	+	71890282	71891162	0	1	880,	0,
6	73602191	73603842	ptr_retrop08467.0	0	+	73602191	73603842	0	1	1651,	0,
6	92476146	92477413	ptr_retrom08481.0	0	-	92476146	92477413	0	1	1267,	0,
6	128632268	128632592	ptriretrop31383.0	0	+	128632268	128632592	0	1	324,	0,
6	144806177	144807428	ptr_retrop08612.0	0	+	144806177	144807428	0	1	1251,	0,
6	152461177	152461556	ptriretrop31638.0	0	+	152461177	152461556	0	1	379,	0,
6	152586638	152755705	ptriretrop31653.0	0	+	152586638	152755705	0	16	48,108,75,103,77,141,69,112,140,42,101,178,108,153,121,461,	0,5799,6781,10530,17878,22152,27677,34665,77281,81228,82330,82967,101825,104288,161531,168606,
6	161189912	161191058	ptr_retrom08615.0	0	-	161189912	161191058	0	1	1146,	0,
6	161470842	161473219	ptr_retrom08619.0	0	-	161470842	161473219	0	1	2377,	0,
6	167885990	167927347	ptr_retrop08662.1	0	+	167885990	167927347	0	2	119,1256,	0,40101,
6	172575227	172595294	ptriretrom31388.1	0	-	172575227	172595294	0	2	676,120,	0,19947,
7	3524526	3526861	ptr_retrom07329.0	0	-	3524526	3526861	0	1	2335,	0,
7	4891182	4893388	ptriretrop26727.0	0	+	4891182	4893388	0	1	2206,	0,
7	15156674	15157195	ptriretrop26835.0	0	+	15156674	15157195	0	1	521,	0,
7	16611091	16612012	ptr_retrom07363.0	0	-	16611091	16612012	0	1	921,	0,
7	20558169	20559387	ptriretrom26882.0	0	-	20558169	20559387	0	1	1218,	0,
7	20790886	20791235	ptr_retrop07237.0	0	+	20790886	20791235	0	1	349,	0,
7	22105969	22106714	ptriretrop26926.0	0	+	22105969	22106714	0	1	745,	0,
7	22204488	22206206	ptr_retrom07372.0	0	-	22204488	22206206	0	1	1718,	0,
7	24870038	24870225	ptr_retrop07244.0	0	+	24870038	24870225	0	1	187,	0,
7	28948207	28951095	ptr_retrop07255.0	0	+	28948207	28951095	0	1	2888,	0,
7	37253679	37255418	ptr_retrom07411.0	0	-	37253679	37255418	0	2	784,858,	0,881,
7	37253679	37255418	ptr_retrom07411.1	0	-	37253679	37255418	0	1	1739,	0,
7	43134425	43134658	ptriretrop27172.0	0	+	43134425	43134658	0	1	233,	0,
7	47568994	47569727	ptr_retrop07284.0	0	+	47568994	47569727	0	1	733,	0,
7	62684605	62685380	ptr_retrop07346.0	0	+	62684605	62685380	0	1	775,	0,
7	62745389	62747125	ptr_retrop07349.0	0	+	62745389	62747125	0	1	1736,	0,
7	62817602	62818455	ptr_retrom07497.0	0	-	62817602	62818455	0	1	853,	0,
7	64914777	64915315	ptriretrom27641.0	0	-	64914777	64915315	0	1	538,	0,
7	65047578	65048435	ptr_retrom07509.0	0	-	65047578	65048435	0	1	857,	0,
7	65105980	65106116	ptr_retrom07510.0	0	-	65105980	65106116	0	1	136,	0,
7	70489576	70490252	ptr_retrop07363.0	0	+	70489576	70490252	0	1	676,	0,
7	73342292	73343513	ptr_retrop07366.0	0	+	73342292	73343513	0	1	1221,	0,
7	76394142	76426303	ptr_retrom07523.0	0	-	76394142	76426303	0	2	3454,246,	0,31915,
7	85487739	85487965	ptriretrop27700.0	0	+	85487739	85487965	0	1	226,	0,
7	110005861	110006578	ptriretrop28022.0	0	+	110005861	110006578	0	1	717,	0,
7	124230535	124231354	ptriretrom28227.0	0	-	124230535	124231354	0	1	819,	0,
7	124234320	124235413	ptriretrom28230.0	0	-	124234320	124235413	0	1	1093,	0,
7	124835151	124837244	ptr_retrop07435.0	0	+	124835151	124837244	0	1	2093,	0,
7	125259440	125260207	ptriretrom28248.0	0	-	125259440	125260207	0	1	767,	0,
7	130603300	130604721	ptr_retrop07449.0	0	+	130603300	130604721	0	1	1421,	0,
7	133155333	133155661	ptriretrom28343.0	0	-	133155333	133155661	0	1	328,	0,
7	134665165	134665462	ptriretrom28380.0	0	-	134665165	134665462	0	1	297,	0,
7	136128608	136161277	ptr_retrop07460.0	0	+	136128608	136161277	0	3	41,662,952,	0,14628,31717,
7	136139000	136161277	ptr_retrop07460.1	0	+	136139000	136161277	0	3	55,662,952,	0,4236,21325,
8	19831168	19838754	ptr_retrop06480.0	0	+	19831168	19838754	0	2	509,4118,	0,3468,
8	19833726	19838754	ptr_retrop06480.1	0	+	19833726	19838754	0	1	5028,	0,
8	34216971	34221148	ptr_retrop06510.0	0	+	34216971	34221148	0	2	392,2863,	0,1314,
8	34269911	34270682	ptriretrom23648.0	0	-	34269911	34270682	0	1	771,	0,
8	51811335	51812002	ptriretrop23774.1	0	+	51811335	51812002	0	1	667,	0,
8	51811405	51812002	ptriretrop23774.0	0	+	51811405	51812002	0	1	597,	0,
8	54240616	54241972	ptr_retrom06737.0	0	-	54240616	54241972	0	1	1356,	0,
8	59322381	59323858	ptr_retrop06552.0	0	+	59322381	59323858	0	1	1477,	0,
8	72582960	72583333	ptriretrom24134.0	0	-	72582960	72583333	0	1	373,	0,
8	79589194	79589576	ptr_retrom06808.0	0	-	79589194	79589576	0	1	382,	0,
8	80218349	80220305	ptr_retrom06812.0	0	-	80218349	80220305	0	1	1956,	0,
8	99650115	99650593	ptriretrop24269.0	0	+	99650115	99650593	0	1	478,	0,
8	110558777	110559109	ptr_retrop06651.0	0	+	110558777	110559109	0	1	332,	0,
8	118356072	118357336	ptr_retrop06654.0	0	+	118356072	118357336	0	1	1264,	0,
8	123121284	123123360	ptriretrop24479.0	0	+	123121284	123123360	0	1	2076,	0,
8	126088419	126089443	ptr_retrop06671.0	0	+	126088419	126089443	0	1	1024,	0,
8	141898359	141898876	ptr_retrop06681.0	0	+	141898359	141898876	0	1	517,	0,
9	6079165	6083713	ptr_retrom06105.1	0	-	6079165	6083713	0	1	4548,	0,
9	15783284	15783898	ptr_retrom06125.0	0	-	15783284	15783898	0	1	614,	0,
9	19341947	19343513	ptriretrop21747.0	0	+	19341947	19343513	0	1	1566,	0,
9	21666106	21670449	ptriretrom22093.0	0	-	21666106	21670449	0	1	4343,	0,
9	33409611	33411016	ptr_retrom06318.0	0	-	33409611	33411016	0	1	1405,	0,
9	33881182	33883001	ptr_retrop05901.0	0	+	33881182	33883001	0	1	1819,	0,
9	36432915	36433319	ptriretrom22329.1	0	-	36432915	36433319	0	1	404,	0,
9	36432917	36433276	ptriretrom22329.0	0	-	36432917	36433276	0	1	359,	0,
9	36781368	36783641	ptr_retrom06381.0	0	-	36781368	36783641	0	1	2273,	0,
9	38391795	38395342	ptr_retrop05944.0	0	+	38391795	38395342	0	1	3547,	0,
9	38895987	38901482	ptr_retrop05946.0	0	+	38895987	38901482	0	2	78,2487,	0,3008,
9	38981428	38982492	ptr_retrop05950.0	0	+	38981428	38982492	0	1	1064,	0,
9	39146022	39147680	ptr_retrop05957.0	0	+	39146022	39147680	0	1	1658,	0,
9	43569085	43569475	ptr_retrop05965.0	0	+	43569085	43569475	0	1	390,	0,
9	66253774	66254928	ptriretrop22172.0	0	+	66253774	66254928	0	1	1154,	0,
9	67328632	67329869	ptriretrop22204.0	0	+	67328632	67329869	0	1	1237,	0,
9	67564200	67565714	ptr_retrom06416.0	0	-	67564200	67565714	0	1	1514,	0,
9	74995758	74996683	ptr_retrop05979.0	0	+	74995758	74996683	0	1	925,	0,
9	87047536	87048239	ptriretrop22408.1	0	+	87047536	87048239	0	1	703,	0,
9	87047718	87048213	ptriretrop22408.0	0	+	87047718	87048213	0	1	495,	0,
9	88221850	88222205	ptriretrop22438.0	0	+	88221850	88222205	0	1	355,	0,
9	91654594	91660271	ptriretrom22677.0	0	-	91654594	91660271	0	1	5677,	0,
9	100426215	100429467	ptriretrom22766.0	0	-	100426215	100429467	0	1	3252,	0,
9	117646063	117649639	ptriretrop22813.0	0	+	117646063	117649639	0	1	3576,	0,
9	124702852	124703729	ptriretrop22963.0	0	+	124702852	124703729	0	1	877,	0,
GL390916.1	3692852	3693260	ptriretrop02716.0	0	+	3692852	3693260	0	1	408,	0,
GL392075.1	5669667	5670708	ptr_retrop01598.0	0	+	5669667	5670708	0	1	1041,	0,
GL392652.1	957647	958205	ptr_retrom00919.0	0	-	957647	958205	0	1	558,	0,
X	7573544	7573905	ptriretrom24906.0	0	-	7573544	7573905	0	1	361,	0,
X	14191743	14193018	ptr_retrop06711.0	0	+	14191743	14193018	0	1	1275,	0,
X	22500656	22502119	ptr_retrop06728.0	0	+	22500656	22502119	0	1	1463,	0,
X	23234027	23235178	ptr_retrop06730.0	0	+	23234027	23235178	0	1	1151,	0,
X	25006147	25006831	ptriretrom25048.0	0	-	25006147	25006831	0	1	684,	0,
X	37443480	37445585	ptr_retrom06947.0	0	-	37443480	37445585	0	1	2105,	0,
X	38839470	38840115	ptr_retrop06799.0	0	+	38839470	38840115	0	1	645,	0,
X	38844159	38845429	ptr_retrom06956.0	0	-	38844159	38845429	0	2	398,456,	0,814,
X	42079090	42079581	ptr_retrom06968.0	0	-	42079090	42079581	0	1	491,	0,
X	48316117	48318061	ptr_retrom06998.0	0	-	48316117	48318061	0	1	1944,	0,
X	49116533	49117045	ptr_retrom07001.0	0	-	49116533	49117045	0	1	512,	0,
X	51551342	51555291	ptr_retrop06846.0	0	+	51551342	51555291	0	2	636,493,	0,3456,
X	53816679	53818616	ptr_retrom07017.0	0	-	53816679	53818616	0	1	1937,	0,
X	57267430	57270411	ptriretrop25305.1	0	+	57267430	57270411	0	1	2981,	0,
X	57688181	57692909	ptr_retrom07026.0	0	-	57688181	57692909	0	2	4030,432,	0,4296,
X	57839919	57841136	ptr_retrom07033.0	0	-	57839919	57841136	0	1	1217,	0,
X	58352869	58355186	ptriretrop25311.0	0	+	58352869	58355186	0	1	2317,	0,
X	58689130	58691891	ptriretrom25519.0	0	-	58689130	58691891	0	1	2761,	0,
X	62886143	62887836	ptr_retrom07047.0	0	-	62886143	62887836	0	1	1693,	0,
X	74126697	74127498	ptr_retrop06911.0	0	+	74126697	74127498	0	1	801,	0,
X	84920056	84920530	ptr_retrop06937.0	0	+	84920056	84920530	0	1	474,	0,
X	95416247	95418174	ptriretrop25784.0	0	+	95416247	95418174	0	1	1927,	0,
X	101757468	101763304	ptr_retrop06968.0	0	+	101757468	101763304	0	2	80,2152,	0,3684,
X	101757468	101763304	ptr_retrop06968.1	0	+	101757468	101763304	0	2	68,2152,	0,3684,
X	104064505	104066616	ptr_retrom07148.0	0	-	104064505	104066616	0	1	2111,	0,
X	104243605	104254724	ptriretrom26075.0	0	-	104243605	104254724	0	4	1517,102,90,47,	0,2961,9619,11072,
X	104397164	104402313	ptr_retrom07154.0	0	-	104397164	104402313	0	2	3569,48,	0,5101,
X	117797007	117798613	ptriretrom26202.0	0	-	117797007	117798613	0	1	1606,	0,
X	121551497	121553140	ptr_retrop07077.1	0	+	121551497	121553140	0	1	1643,	0,
X	121551612	121553068	ptr_retrop07077.0	0	+	121551612	121553068	0	1	1456,	0,
X	133878724	133879296	ptriretrop26323.1	0	+	133878724	133879296	0	1	572,	0,
X	133878891	133879294	ptriretrop26323.0	0	+	133878891	133879294	0	1	403,	0,
X	137513169	137514678	ptr_retrom07251.0	0	-	137513169	137514678	0	1	1509,	0,
X	137553087	137555174	ptr_retrop07136.0	0	+	137553087	137555174	0	1	2087,	0,
X	139849634	139851246	ptr_retrop07139.0	0	+	139849634	139851246	0	1	1612,	0,
X	140819121	140820419	ptr_retrop07143.0	0	+	140819121	140820419	0	1	1298,	0,
X	148789665	148790302	ptr_retrop07152.0	0	+	148789665	148790302	0	1	637,	0,
Y	20698095	20698919	ptriretrop04075.0	0	+	20698095	20698919	0	1	824,	0,

## Sheet: Gorilla
# Supplemental Table S11: Retrocopy transcripts in gorilla (BED12 format)
Chromosome	Start	End	Transcript_ID	Score (not defined)	Strand	Thick Start (not defined)	Thick End (not defined)	Item_RGB (not defined)	Exon_count	Exon_sizes	Exon_starts
1	16297901	16298309	ggoiretrom34607.0	0	-	16297901	16298309	0	1	408,	0,
1	22157138	22157770	ggo_retrom04458.0	0	-	22157138	22157770	0	1	632,	0,
1	26292997	26293789	ggo_retrop04447.0	0	+	26292997	26293789	0	1	792,	0,
1	26295275	26295851	ggo_retrop04448.0	0	+	26295275	26295851	0	1	576,	0,
1	26805240	26806311	ggo_retrop04449.0	0	+	26805240	26806311	0	1	1071,	0,
1	27809328	27810132	ggo_retrop04453.0	0	+	27809328	27810132	0	1	804,	0,
1	28165147	28165876	ggoiretrom35284.0	0	-	28165147	28165876	0	1	729,	0,
1	29089340	29089715	ggo_retrom04479.0	0	-	29089340	29089715	0	1	375,	0,
1	41021955	41023578	ggo_retrom04493.0	0	-	41021955	41023578	0	1	1623,	0,
1	43973366	43973515	ggo_retrom04501.0	0	-	43973366	43973515	0	1	149,	0,
1	53836939	53837739	ggoiretrop37312.0	0	+	53836939	53837739	0	1	800,	0,
1	55144164	55146803	ggo_retrom04531.0	0	-	55144164	55146803	0	1	2639,	0,
1	60430769	60431137	ggo_retrop04520.0	0	+	60430769	60431137	0	1	368,	0,
1	60462935	60464928	ggoiretrom36285.0	0	-	60462935	60464928	0	1	1993,	0,
1	60462935	60464928	ggoiretrom36285.1	0	-	60462935	60464928	0	2	850,1077,	0,916,
1	78949767	78950975	ggo_retrop04534.0	0	+	78949767	78950975	0	1	1208,	0,
1	78949767	78950975	ggo_retrop04534.1	0	+	78949767	78950975	0	1	1208,	0,
1	91410760	91425726	ggo_retrom04563.0	0	-	91410760	91425726	0	2	4541,151,	0,14815,
1	91525199	91525325	ggo_retrom04564.0	0	-	91525199	91525325	0	1	126,	0,
1	93929321	93931259	ggoiretrom37117.0	0	-	93929321	93931259	0	1	1938,	0,
1	94507226	94507631	ggoiretrom37118.0	0	-	94507226	94507631	0	1	405,	0,
1	94666395	94667615	ggo_retrom04571.0	0	-	94666395	94667615	0	1	1220,	0,
1	102929737	102930361	ggo_retrop04564.0	0	+	102929737	102930361	0	1	624,	0,
1	106352940	106354799	ggo_retrop04568.0	0	+	106352940	106354799	0	1	1859,	0,
1	106352940	106355147	ggo_retrop04568.1	0	+	106352940	106355147	0	2	1556,76,	0,2131,
1	110346141	110346224	ggo_retrop04571.0	0	+	110346141	110346224	0	1	83,	0,
1	122601765	122602689	ggoiretrom33928.0	0	-	122601765	122602689	0	1	924,	0,
1	123245821	123246373	ggo_retrom04620.0	0	-	123245821	123246373	0	1	552,	0,
1	125667109	125667499	ggo_retrop04613.0	0	+	125667109	125667499	0	1	390,	0,
1	125948522	125948847	ggo_retrom04626.0	0	-	125948522	125948847	0	1	325,	0,
1	126046153	126047200	ggo_retrop04617.1	0	+	126046153	126047200	0	1	1047,	0,
1	126073583	126076957	ggoiretrom34884.0	0	-	126073583	126076957	0	1	3374,	0,
1	139319741	139320435	ggo_retrom04691.0	0	-	139319741	139320435	0	1	694,	0,
1	139739892	139741402	ggoiretrop35960.0	0	+	139739892	139741402	0	1	1510,	0,
1	140610528	140612883	ggo_retrop04681.0	0	+	140610528	140612883	0	1	2355,	0,
1	146329795	146329875	ggo_retrom04699.0	0	-	146329795	146329875	0	1	80,	0,
1	148129555	148144625	ggo_retrop04703.1	0	+	148129555	148144625	0	2	89,607,	0,14463,
1	148144018	148144620	ggo_retrop04703.0	0	+	148144018	148144620	0	1	602,	0,
1	181435859	181437398	ggoiretrop37580.1	0	+	181435859	181437398	0	2	706,48,	0,1491,
1	181435868	181436456	ggoiretrop37580.0	0	+	181435868	181436456	0	1	588,	0,
1	189222536	189224423	ggo_retrop04762.0	0	+	189222536	189224423	0	1	1887,	0,
1	199933580	199935281	ggo_retrom04772.0	0	-	199933580	199935281	0	1	1701,	0,
1	202851580	202852195	ggo_retrom04781.0	0	-	202851580	202852195	0	1	615,	0,
1	202860966	202861884	ggo_retrom04790.0	0	-	202860966	202861884	0	1	918,	0,
1	208177510	208178373	ggo_retrop04793.0	0	+	208177510	208178373	0	1	863,	0,
1	208905509	208915832	ggo_retrop04804.0	0	+	208905509	208915832	0	2	1413,3364,	0,6959,
1	216648628	216790599	ggo_retrop04814.0	0	+	216648628	216790599	0	7	693,136,59,40,59,46,2617,	0,2430,59271,66792,79864,123009,139354,
1	221988889	221994474	ggo_retrom04828.0	0	-	221988889	221994474	0	1	5585,	0,
1	225226664	225227074	ggo_retrom04842.0	0	-	225226664	225227074	0	1	410,	0,
10	5671809	5672984	ggo_retrop02536.0	0	+	5671809	5672984	0	1	1175,	0,
10	6022502	6023961	ggoiretrom20997.0	0	-	6022502	6023961	0	1	1459,	0,
10	6022514	6039919	ggoiretrom20997.1	0	-	6022514	6039919	0	3	501,191,75,	0,16758,17330,
10	13740497	13740814	ggo_retrop02541.0	0	+	13740497	13740814	0	1	317,	0,
10	55156876	55165900	ggo_retrom02760.0	0	-	55156876	55165900	0	2	1960,56,	0,8968,
10	58089657	58094887	ggo_retrop02583.1	0	+	58089657	58094887	0	3	336,195,134,	0,4734,5096,
10	58089661	58090215	ggo_retrop02583.0	0	+	58089661	58090215	0	1	554,	0,
10	70422124	70422602	ggo_retrom02786.0	0	-	70422124	70422602	0	1	478,	0,
10	81003512	81004075	ggo_retrom02797.0	0	-	81003512	81004075	0	1	563,	0,
10	82675065	82678801	ggo_retrop02617.0	0	+	82675065	82678801	0	1	3736,	0,
10	86059403	86060883	ggoiretrom20759.0	0	-	86059403	86060883	0	1	1480,	0,
10	87761586	87761687	ggo_retrom02814.0	0	-	87761586	87761687	0	1	101,	0,
10	92270460	92271082	ggo_retrop02632.0	0	+	92270460	92271082	0	1	622,	0,
10	99382881	99383371	ggoiretrop20587.0	0	+	99382881	99383371	0	1	490,	0,
10	101950248	101951391	ggo_retrop02644.0	0	+	101950248	101951391	0	1	1143,	0,
10	104273343	104277314	ggoiretrom21144.1	0	-	104273343	104277314	0	1	3971,	0,
10	109525522	109527583	ggo_retrom02841.0	0	-	109525522	109527583	0	1	2061,	0,
10	124733946	124734080	ggo_retrom02857.0	0	-	124733946	124734080	0	1	134,	0,
11	3768530	3782624	ggo_retrom02120.0	0	-	3768530	3782624	0	2	1225,43,	0,14051,
11	6470497	6476280	ggoiretrom18312.0	0	-	6470497	6476280	0	1	5783,	0,
11	7091281	7095702	ggo_retrop02089.0	0	+	7091281	7095702	0	1	4421,	0,
11	29649776	29650114	ggoiretrom15995.0	0	-	29649776	29650114	0	1	338,	0,
11	33279652	33280748	ggo_retrop02119.0	0	+	33279652	33280748	0	1	1096,	0,
11	34338682	34340445	ggoiretrom18344.0	0	-	34338682	34340445	0	1	1763,	0,
11	39807898	39808313	ggo_retrop02127.0	0	+	39807898	39808313	0	1	415,	0,
11	50158666	50160150	ggoiretrom16711.0	0	-	50158666	50160150	0	1	1484,	0,
11	59146714	59148175	ggo_retrop02237.0	0	+	59146714	59148175	0	1	1461,	0,
11	60050907	60053398	ggoiretrom18793.0	0	-	60050907	60053398	0	4	1926,149,70,37,	0,2048,2287,2454,
11	66628218	66630974	ggo_retrop02256.0	0	+	66628218	66630974	0	2	347,898,	0,1858,
11	71759880	71760215	ggo_retrom02359.0	0	-	71759880	71760215	0	1	335,	0,
11	71938165	71938848	ggo_retrop02269.0	0	+	71938165	71938848	0	1	683,	0,
11	74807422	74808075	ggo_retrom02368.0	0	-	74807422	74808075	0	1	653,	0,
11	91510956	91511268	ggoiretrom16963.0	0	-	91510956	91511268	0	1	312,	0,
11	101609242	101610736	ggo_retrop02312.0	0	+	101609242	101610736	0	1	1494,	0,
11	110010571	110011747	ggoiretrop17072.0	0	+	110010571	110011747	0	1	1176,	0,
11	110016975	110020924	ggo_retrop02323.0	0	+	110016975	110020924	0	3	184,111,972,	0,1421,2977,
11	111624702	111625920	ggoiretrop16215.0	0	+	111624702	111625920	0	1	1218,	0,
11	120980286	121058047	ggo_retrop02336.0	0	+	120980286	121058047	0	8	433,520,114,656,295,81,129,4545,	0,15468,39224,48458,60581,70453,71320,73216,
11	121717296	121718436	ggoiretrom17044.0	0	-	121717296	121718436	0	1	1140,	0,
11	122975360	122977147	ggo_retrom02474.0	0	-	122975360	122977147	0	1	1787,	0,
11	123280629	123283800	ggo_retrop02358.0	0	+	123280629	123283800	0	1	3171,	0,
11	124249598	124250208	ggo_retrop02360.0	0	+	124249598	124250208	0	1	610,	0,
11	128331382	128332020	ggoiretrom17077.0	0	-	128331382	128332020	0	1	638,	0,
11	128331452	128332011	ggoiretrom17077.1	0	-	128331452	128332011	0	1	559,	0,
12	10533831	10534753	ggo_retrop01800.0	0	+	10533831	10534753	0	1	922,	0,
12	12245138	12247897	ggo_retrom01933.0	0	-	12245138	12247897	0	1	2759,	0,
12	13062156	13064559	ggoiretrop14399.0	0	+	13062156	13064559	0	1	2403,	0,
12	42989018	42989977	ggo_retrom01971.0	0	-	42989018	42989977	0	1	959,	0,
12	51164486	51164827	ggoiretrop14507.0	0	+	51164486	51164827	0	1	341,	0,
12	54615814	54616175	ggo_retrop01910.0	0	+	54615814	54616175	0	1	361,	0,
12	61270471	61270665	ggoiretrop14594.0	0	+	61270471	61270665	0	1	194,	0,
12	62085880	62087166	ggo_retrop01929.0	0	+	62085880	62087166	0	2	772,288,	0,998,
12	62085880	62087713	ggo_retrop01929.1	0	+	62085880	62087713	0	1	1833,	0,
12	62530726	62533015	ggo_retrop01930.0	0	+	62530726	62533015	0	1	2289,	0,
12	77462475	77463230	ggo_retrom02038.0	0	-	77462475	77463230	0	1	755,	0,
12	86653250	86655288	ggo_retrom02045.1	0	-	86653250	86655288	0	1	2038,	0,
12	87144733	87145596	ggoiretrom14820.0	0	-	87144733	87145596	0	1	863,	0,
12	101189686	101189849	ggoiretrom15737.0	0	-	101189686	101189849	0	1	163,	0,
12	103687886	103689313	ggoiretrop14679.0	0	+	103687886	103689313	0	1	1427,	0,
12	118992155	118993290	ggo_retrop01998.0	0	+	118992155	118993290	0	1	1135,	0,
12	120125910	120126796	ggo_retrop02001.0	0	+	120125910	120126796	0	1	886,	0,
12	132246648	132255254	ggoiretrom14920.0	0	-	132246648	132255254	0	1	8606,	0,
13	2975423	2978359	ggo_retrop01166.1	0	+	2975423	2978359	0	1	2936,	0,
13	3017712	3022226	ggo_retrop01167.0	0	+	3017712	3022226	0	1	4514,	0,
13	4622725	4626683	ggo_retrop01168.0	0	+	4622725	4626683	0	1	3958,	0,
13	6882034	6884023	ggo_retrop01171.0	0	+	6882034	6884023	0	1	1989,	0,
13	9454980	9456539	ggoiretrop09639.0	0	+	9454980	9456539	0	2	145,556,	0,1003,
13	12269596	12273580	ggoiretrop09082.0	0	+	12269596	12273580	0	1	3984,	0,
13	12269596	12275068	ggoiretrop09082.1	0	+	12269596	12275068	0	2	3870,415,	0,5057,
13	19030799	19033617	ggo_retrom01274.0	0	-	19030799	19033617	0	1	2818,	0,
13	19126029	19126672	ggoiretrom09189.0	0	-	19126029	19126672	0	1	643,	0,
13	32131165	32132142	ggoiretrop09116.0	0	+	32131165	32132142	0	1	977,	0,
13	33736399	33737272	ggo_retrop01209.0	0	+	33736399	33737272	0	1	873,	0,
13	34260895	34261071	ggo_retrop01211.0	0	+	34260895	34261071	0	1	176,	0,
13	34303400	34323124	ggo_retrop01212.1	0	+	34303400	34323124	0	3	61,932,3663,	0,11734,16061,
13	34303400	34323124	ggo_retrop01212.2	0	+	34303400	34323124	0	4	61,231,932,3663,	0,6516,11734,16061,
13	34303403	34323124	ggo_retrop01212.0	0	+	34303403	34323124	0	2	58,3663,	0,16058,
13	55706447	55706782	ggo_retrom01316.0	0	-	55706447	55706782	0	1	335,	0,
13	72233106	72235053	ggoiretrom09530.0	0	-	72233106	72235053	0	1	1947,	0,
13	82187943	82188341	ggo_retrom01337.0	0	-	82187943	82188341	0	1	398,	0,
13	94240076	94241897	ggoiretrop09044.0	0	+	94240076	94241897	0	1	1821,	0,
14	15803262	15803716	ggoiretrom06648.0	0	-	15803262	15803716	0	1	454,	0,
14	16681816	16682338	ggoiretrop06620.0	0	+	16681816	16682338	0	1	522,	0,
14	25414518	25414917	ggoiretrom06667.0	0	-	25414518	25414917	0	1	399,	0,
14	27399826	27401324	ggo_retrom00922.0	0	-	27399826	27401324	0	1	1498,	0,
14	30424228	30427029	ggoiretrom06401.0	0	-	30424228	30427029	0	2	448,935,	0,1866,
14	30711311	30715248	ggo_retrop00922.1	0	+	30711311	30715248	0	1	3937,	0,
14	30711320	30715248	ggo_retrop00922.0	0	+	30711320	30715248	0	2	62,3766,	0,162,
14	36069313	36070408	ggoiretrom06698.0	0	-	36069313	36070408	0	1	1095,	0,
14	36130405	36131123	ggo_retrop00930.0	0	+	36130405	36131123	0	1	718,	0,
14	42233456	42236361	ggo_retrom00945.0	0	-	42233456	42236361	0	2	2013,874,	0,2031,
14	44568296	44568408	ggoiretrop07609.0	0	+	44568296	44568408	0	1	112,	0,
14	45535566	45538093	ggo_retrop00958.0	0	+	45535566	45538093	0	1	2527,	0,
14	45535705	45537640	ggo_retrop00958.1	0	+	45535705	45537640	0	1	1935,	0,
14	56873730	56873836	ggoiretrom06444.0	0	-	56873730	56873836	0	1	106,	0,
14	64167209	64167612	ggoiretrom06779.0	0	-	64167209	64167612	0	1	403,	0,
14	83655503	83655912	ggoiretrop06238.0	0	+	83655503	83655912	0	1	409,	0,
14	88362263	88362787	ggo_retrom01031.0	0	-	88362263	88362787	0	2	302,111,	0,413,
14	88584854	88585197	ggoiretrom07575.0	0	-	88584854	88585197	0	1	343,	0,
14	88874018	88874525	ggo_retrom01080.0	0	-	88874018	88874525	0	2	293,111,	0,396,
15	856673	858337	ggo_retrom00718.0	0	-	856673	858337	0	1	1664,	0,
15	2337820	2341085	ggo_retrom00728.0	0	-	2337820	2341085	0	1	3265,	0,
15	2570408	2572529	ggo_retrop00694.0	0	+	2570408	2572529	0	1	2121,	0,
15	8199273	8199633	ggo_retrop00699.0	0	+	8199273	8199633	0	1	360,	0,
15	13439858	13440947	ggo_retrop00711.0	0	+	13439858	13440947	0	1	1089,	0,
15	15195713	15209627	ggo_retrom00751.0	0	-	15195713	15209627	0	4	61,99,112,777,	0,4407,12595,13137,
15	19359964	19361812	ggo_retrom00756.0	0	-	19359964	19361812	0	3	1300,59,115,	0,1485,1733,
15	21297248	21297578	ggo_retrop00728.0	0	+	21297248	21297578	0	1	330,	0,
15	24311965	24313814	ggo_retrop00740.0	0	+	24311965	24313814	0	1	1849,	0,
15	24311965	24313814	ggo_retrop00740.1	0	+	24311965	24313814	0	1	1849,	0,
15	38372844	38374352	ggo_retrop00765.0	0	+	38372844	38374352	0	1	1508,	0,
15	45691916	45692426	ggo_retrom00806.0	0	-	45691916	45692426	0	1	510,	0,
15	50614146	50615896	ggo_retrom00814.0	0	-	50614146	50615896	0	1	1750,	0,
15	58986396	58987745	ggo_retrop00805.0	0	+	58986396	58987745	0	1	1349,	0,
15	62742397	62743780	ggo_retrom00847.0	0	-	62742397	62743780	0	1	1383,	0,
15	68980091	68981314	ggo_retrom00857.0	0	-	68980091	68981314	0	1	1223,	0,
15	69482529	69482865	ggoiretrom05224.0	0	-	69482529	69482865	0	1	336,	0,
15	70025421	70029861	ggo_retrop00817.0	0	+	70025421	70029861	0	1	4440,	0,
15	72581643	72581887	ggoiretrop05612.0	0	+	72581643	72581887	0	1	244,	0,
15	72599856	72600442	ggo_retrom00862.0	0	-	72599856	72600442	0	1	586,	0,
15	76747121	76748980	ggo_retrop00833.0	0	+	76747121	76748980	0	1	1859,	0,
16	16564646	16565256	ggo_retrom00599.0	0	-	16564646	16565256	0	1	610,	0,
16	16800710	16803245	ggoiretrom04060.0	0	-	16800710	16803245	0	1	2535,	0,
16	31188073	31190002	ggoiretrom04923.0	0	-	31188073	31190002	0	1	1929,	0,
16	31188073	31190295	ggoiretrom04923.1	0	-	31188073	31190295	0	1	2222,	0,
16	31581894	31582981	ggo_retrom00620.0	0	-	31581894	31582981	0	1	1087,	0,
16	65022935	65024654	ggoiretrop04692.0	0	+	65022935	65024654	0	1	1719,	0,
16	66629406	66630437	ggo_retrom00696.1	0	-	66629406	66630437	0	1	1031,	0,
16	72496307	72499820	ggoiretrom04467.0	0	-	72496307	72499820	0	2	2802,145,	0,3368,
16	72496307	72511420	ggoiretrom04467.2	0	-	72496307	72511420	0	3	2802,94,107,	0,3368,15006,
16	77115795	77117520	ggo_retrop00672.0	0	+	77115795	77117520	0	1	1725,	0,
16	78016080	78027899	ggo_retrop00676.0	0	+	78016080	78027899	0	3	55,272,897,	0,9878,10922,
16	78025856	78027899	ggo_retrop00676.1	0	+	78025856	78027899	0	1	2043,	0,
16	80925721	80926626	ggo_retrop00683.0	0	+	80925721	80926626	0	1	905,	0,
17	2292442	2293784	ggoiretrop08102.0	0	+	2292442	2293784	0	1	1342,	0,
17	4805553	4806310	ggo_retrom01100.0	0	-	4805553	4806310	0	1	757,	0,
17	4962126	4963085	ggoiretrom08414.0	0	-	4962126	4963085	0	1	959,	0,
17	16095628	16096421	ggo_retrop01068.0	0	+	16095628	16096421	0	1	793,	0,
17	16281353	16282290	ggoiretrom08268.0	0	-	16281353	16282290	0	1	937,	0,
17	20425154	20426772	ggoiretrom08576.0	0	-	20425154	20426772	0	1	1618,	0,
17	26280655	26282737	ggo_retrom01151.0	0	-	26280655	26282737	0	1	2082,	0,
17	27465007	27465434	ggo_retrop01096.0	0	+	27465007	27465434	0	1	427,	0,
17	30298814	30301075	ggo_retrom01161.0	0	-	30298814	30301075	0	1	2261,	0,
17	60568322	60569033	ggo_retrom01200.0	0	-	60568322	60569033	0	1	711,	0,
17	61562607	61580803	ggo_retrom01203.0	0	-	61562607	61580803	0	2	726,233,	0,17963,
17	76309207	76310673	ggo_retrop01141.0	0	+	76309207	76310673	0	2	526,848,	0,618,
17	76309770	76310673	ggo_retrop01141.1	0	+	76309770	76310673	0	1	903,	0,
18	552759	554250	ggo_retrop00487.0	0	+	552759	554250	0	1	1491,	0,
18	10028306	10029898	ggo_retrop00496.1	0	+	10028306	10029898	0	2	119,965,	0,627,
18	12074009	12075379	ggo_retrop00498.0	0	+	12074009	12075379	0	1	1370,	0,
18	21496687	21497703	ggo_retrop00510.0	0	+	21496687	21497703	0	1	1016,	0,
18	43578037	43579708	ggo_retrop00521.0	0	+	43578037	43579708	0	1	1671,	0,
18	44833473	44833992	ggo_retrop00524.0	0	+	44833473	44833992	0	1	519,	0,
18	52260340	52260652	ggoiretrom03565.0	0	-	52260340	52260652	0	1	312,	0,
18	55081343	55084374	ggoiretrop03726.0	0	+	55081343	55084374	0	1	3031,	0,
19	76125	76897	ggo_retrom00162.0	0	-	76125	76897	0	1	772,	0,
19	80450	81195	ggo_retrom00165.0	0	-	80450	81195	0	1	745,	0,
19	88107	88527	ggo_retrom00170.0	0	-	88107	88527	0	1	420,	0,
19	9969694	9970327	ggoiretrop01589.0	0	+	9969694	9970327	0	1	633,	0,
19	12886869	12887439	ggo_retrom00213.0	0	-	12886869	12887439	0	1	570,	0,
19	15069097	15070198	ggoiretrop01612.0	0	+	15069097	15070198	0	1	1101,	0,
19	20838787	20839543	ggo_retrop00251.0	0	+	20838787	20839543	0	1	756,	0,
19	22506792	22507120	ggoiretrop01290.0	0	+	22506792	22507120	0	1	328,	0,
19	22753592	22755163	ggo_retrom00242.0	0	-	22753592	22755163	0	1	1571,	0,
19	22753592	22779975	ggo_retrom00242.1	0	-	22753592	22779975	0	2	1551,132,	0,26251,
19	27147738	27149293	ggo_retrop00262.0	0	+	27147738	27149293	0	1	1555,	0,
19	33809733	33811750	ggo_retrom00265.0	0	-	33809733	33811750	0	1	2017,	0,
19	35053995	35055594	ggo_retrom00269.0	0	-	35053995	35055594	0	2	457,1058,	0,541,
19	35147395	35149579	ggoiretrop01723.0	0	+	35147395	35149579	0	1	2184,	0,
19	40001825	40001920	ggo_retrop00308.0	0	+	40001825	40001920	0	1	95,	0,
19	45049090	45049679	ggoiretrom01574.0	0	-	45049090	45049679	0	1	589,	0,
19	47254244	47276974	ggo_retrom00307.0	0	-	47254244	47276974	0	2	2280,129,	0,22601,
19	48997507	48999955	ggo_retrop00349.0	0	+	48997507	48999955	0	2	542,786,	0,1662,
19	50242084	50243707	ggoiretrop02749.0	0	+	50242084	50243707	0	1	1623,	0,
19	50656407	50656843	ggo_retrom00322.0	0	-	50656407	50656843	0	1	436,	0,
19	50724343	50728184	ggoiretrom01362.0	0	-	50724343	50728184	0	1	3841,	0,
19	53860216	53862354	ggo_retrom00335.0	0	-	53860216	53862354	0	1	2138,	0,
19	55397902	55398520	ggoiretrom01652.0	0	-	55397902	55398520	0	1	618,	0,
19	55618555	55621790	ggo_retrop00380.0	0	+	55618555	55621790	0	1	3235,	0,
20	12686499	12686820	ggoiretrop03092.0	0	+	12686499	12686820	0	1	321,	0,
20	23958392	23962310	ggo_retrop00417.0	0	+	23958392	23962310	0	2	234,764,	0,3154,
20	29621213	29647222	ggoiretrop02983.0	0	+	29621213	29647222	0	8	1462,102,123,119,114,106,179,2323,	0,6445,6754,6983,17819,18604,22636,23686,
20	31097220	31098344	ggo_retrom00405.0	0	-	31097220	31098344	0	1	1124,	0,
20	41392113	41393210	ggo_retrop00444.0	0	+	41392113	41393210	0	1	1097,	0,
20	44267151	44269840	ggo_retrom00439.0	0	-	44267151	44269840	0	1	2689,	0,
20	47048341	47048529	ggoiretrop02897.0	0	+	47048341	47048529	0	2	47,140,	0,48,
20	51963239	51964325	ggoiretrom02775.0	0	-	51963239	51964325	0	1	1086,	0,
20	62130143	62131325	ggo_retrop00483.0	0	+	62130143	62131325	0	1	1182,	0,
21	2052932	2055337	ggoiretrom00465.0	0	-	2052932	2055337	0	1	2405,	0,
21	7574944	7576924	ggo_retrop00022.0	0	+	7574944	7576924	0	1	1980,	0,
21	17268424	17271519	ggo_retrom00033.0	0	-	17268424	17271519	0	3	735,283,149,	0,2116,2946,
21	17270282	17271463	ggo_retrom00033.1	0	-	17270282	17271463	0	2	541,93,	0,1088,
21	22470018	22480966	ggo_retrop00034.0	0	+	22470018	22480966	0	1	10948,	0,
21	24316631	24318713	ggoiretrop00179.0	0	+	24316631	24318713	0	1	2082,	0,
22	2546812	2550219	ggo_retrom00082.0	0	-	2546812	2550219	0	1	3407,	0,
22	4999574	5000726	ggo_retrop00064.1	0	-	4999574	5000726	0	1	1152,	0,
22	4999574	5000726	ggo_retrop00064.1	0	-	4999574	5000726	0	1	1152,	0,
22	4999941	5001409	ggo_retrop00064.0	0	-	4999941	5001409	0	1	1468,	0,
22	4999941	5001409	ggo_retrop00064.0	0	-	4999941	5001409	0	1	1468,	0,
22	6905006	6908584	ggoiretrop01003.0	0	+	6905006	6908584	0	2	1166,219,	0,3359,
22	6905014	6934831	ggoiretrop01003.1	0	+	6905014	6934831	0	2	1158,1940,	0,27877,
22	8167575	8169442	ggo_retrop00133.0	0	+	8167575	8169442	0	1	1867,	0,
22	8167575	8169442	ggo_retrop00133.0	0	+	8167575	8169442	0	1	1867,	0,
22	8182854	8183278	ggo_retrom00101.0	0	-	8182854	8183278	0	1	424,	0,
22	8653479	8654664	ggoiretrop00651.0	0	+	8653479	8654664	0	1	1185,	0,
22	14200997	14201623	ggo_retrom00109.0	0	-	14200997	14201623	0	1	626,	0,
22	14754766	14755865	ggo_retrom00114.0	0	-	14754766	14755865	0	1	1099,	0,
22	15014959	15015461	ggoiretrop01021.0	0	+	15014959	15015461	0	1	502,	0,
22	15422041	15427550	ggoiretrop00674.0	0	+	15422041	15427550	0	1	5509,	0,
22	16110904	16123842	ggo_retrop00150.0	0	+	16110904	16123842	0	2	189,1453,	0,11485,
22	16206277	16206551	ggo_retrop00151.0	0	+	16206277	16206551	0	1	274,	0,
22	26480663	26481232	ggoiretrom00762.0	0	-	26480663	26481232	0	1	569,	0,
2a	20735295	20737558	ggo_retrop01273.0	0	+	20735295	20737558	0	1	2263,	0,
2a	26239502	26241065	ggo_retrop01277.0	0	+	26239502	26241065	0	1	1563,	0,
2a	26420627	26420725	ggoiretrop09991.0	0	+	26420627	26420725	0	1	98,	0,
2a	38649182	38649743	ggoiretrop10021.0	0	+	38649182	38649743	0	1	561,	0,
2a	47318774	47326504	ggo_retrom01402.0	0	-	47318774	47326504	0	2	960,35,	0,7695,
2a	48505724	48505826	ggo_retrom01404.0	0	-	48505724	48505826	0	1	102,	0,
2a	62063776	62070150	ggo_retrom01416.0	0	-	62063776	62070150	0	1	6374,	0,
2a	63324438	63325416	ggoiretrop10063.0	0	+	63324438	63325416	0	1	978,	0,
2a	71393675	71395214	ggo_retrop01319.0	0	+	71393675	71395214	0	1	1539,	0,
2a	85767780	85771208	ggoiretrop10701.0	0	+	85767780	85771208	0	1	3428,	0,
2a	92388029	92389203	ggoiretrom11298.0	0	-	92388029	92389203	0	1	1174,	0,
2a	98721805	98725053	ggoiretrom10534.0	0	-	98721805	98725053	0	1	3248,	0,
2a	102415907	102416748	ggoiretrop10752.0	0	+	102415907	102416748	0	1	841,	0,
2a	106424160	106427894	ggoiretrop10160.0	0	+	106424160	106427894	0	2	70,2621,	0,1113,
2a	109758349	109758777	ggoiretrom10554.0	0	-	109758349	109758777	0	1	428,	0,
2b	7049331	7055160	ggo_retrom01743.0	0	-	7049331	7055160	0	1	5829,	0,
2b	14508730	14509317	ggo_retrop01622.0	0	+	14508730	14509317	0	1	587,	0,
2b	15201507	15201765	ggoiretrop12848.0	0	+	15201507	15201765	0	1	258,	0,
2b	17628644	17635665	ggo_retrop01627.0	0	+	17628644	17635665	0	2	120,5396,	0,1625,
2b	18188601	18190307	ggo_retrop01631.0	0	+	18188601	18190307	0	2	332,1349,	0,357,
2b	18293839	18294385	ggo_retrom01756.0	0	-	18293839	18294385	0	1	546,	0,
2b	18349608	18355240	ggo_retrom01757.1	0	-	18349608	18355240	0	2	474,2030,	0,3602,
2b	18349629	18355231	ggo_retrom01757.0	0	-	18349629	18355231	0	2	453,1163,	0,4439,
2b	18366857	18368800	ggo_retrom01758.0	0	-	18366857	18368800	0	1	1943,	0,
2b	18384694	18386175	ggo_retrop01632.0	0	+	18384694	18386175	0	1	1481,	0,
2b	18647663	18649722	ggo_retrom01760.0	0	-	18647663	18649722	0	1	2059,	0,
2b	18647663	18649722	ggo_retrom01760.1	0	-	18647663	18649722	0	2	1876,91,	0,1968,
2b	46562545	46562839	ggo_retrop01663.0	0	+	46562545	46562839	0	1	294,	0,
2b	49171296	49174658	ggo_retrom01796.0	0	-	49171296	49174658	0	1	3362,	0,
2b	71140420	71141987	ggo_retrom01818.0	0	-	71140420	71141987	0	1	1567,	0,
2b	78014717	78015269	ggo_retrop01694.0	0	+	78014717	78015269	0	1	552,	0,
2b	90080866	90093054	ggoiretrom13088.0	0	-	90080866	90093054	0	7	4077,122,94,74,192,124,515,	0,5768,6956,7713,8870,9369,11673,
2b	107280197	107280350	ggoiretrop12646.0	0	+	107280197	107280350	0	1	153,	0,
2b	121592118	121593041	ggoiretrop13414.0	0	+	121592118	121593041	0	1	923,	0,
2b	123010961	123012827	ggoiretrom13390.1	0	-	123010961	123012827	0	2	922,527,	0,1339,
2b	123010963	123011959	ggoiretrom13390.0	0	-	123010963	123011959	0	2	472,309,	0,687,
3	7019829	7019992	ggoiretrom30555.0	0	-	7019829	7019992	0	1	163,	0,
3	12673485	12673783	ggoiretrop31333.0	0	+	12673485	12673783	0	1	298,	0,
3	33060696	33061890	ggo_retrop03944.0	0	+	33060696	33061890	0	1	1194,	0,
3	45983481	46024577	ggo_retrop03964.0	0	+	45983481	46024577	0	9	93,165,110,73,38,166,132,122,632,	0,964,3011,7868,8404,11675,12097,12562,40464,
3	49431145	49431233	ggoiretrop31429.0	0	+	49431145	49431233	0	1	88,	0,
3	56115231	56115506	ggo_retrop03995.0	0	+	56115231	56115506	0	1	275,	0,
3	63292693	63292873	ggo_retrom04016.0	0	-	63292693	63292873	0	1	180,	0,
3	69725422	69725766	ggoiretrop31485.0	0	+	69725422	69725766	0	1	344,	0,
3	74933630	74934278	ggoiretrom30729.0	0	-	74933630	74934278	0	2	155,492,	0,156,
3	93912099	93914210	ggoiretrom30756.0	0	-	93912099	93914210	0	1	2111,	0,
3	100593413	100593605	ggo_retrom04044.0	0	-	100593413	100593605	0	1	192,	0,
3	106241219	106242114	ggoiretrom30173.0	0	-	106241219	106242114	0	1	895,	0,
3	107566447	107567244	ggoiretrop33012.0	0	+	107566447	107567244	0	1	797,	0,
3	107568129	107568731	ggo_retrop04062.0	0	+	107568129	107568731	0	1	602,	0,
3	122042505	122045063	ggo_retrom04068.0	0	-	122042505	122045063	0	1	2558,	0,
3	128360204	128361201	ggo_retrom04075.0	0	-	128360204	128361201	0	1	997,	0,
3	136907377	136908038	ggoiretrom30446.0	0	-	136907377	136908038	0	1	661,	0,
3	153732684	153738189	ggo_retrop04125.1	0	+	153732684	153738189	0	1	5505,	0,
3	157533982	157534223	ggoiretrom31184.0	0	-	157533982	157534223	0	2	192,48,	0,193,
3	161353119	161356176	ggo_retrop04134.0	0	+	161353119	161356176	0	1	3057,	0,
3	161353119	161356176	ggo_retrop04134.1	0	+	161353119	161356176	0	2	307,1365,	0,1692,
3	170712816	170714882	ggo_retrom04149.0	0	-	170712816	170714882	0	1	2066,	0,
3	175445496	175446202	ggo_retrop04148.0	0	+	175445496	175446202	0	1	706,	0,
3	180460566	180478280	ggoiretrom30953.1	0	-	180460566	180478280	0	4	733,199,192,642,	0,1944,8666,17072,
3	180461068	180479885	ggoiretrom30953.0	0	-	180461068	180479885	0	4	231,199,192,2247,	0,1442,8164,16570,
3	185395095	185396032	ggo_retrom04164.0	0	-	185395095	185396032	0	1	937,	0,
3	185511055	185520786	ggo_retrop04158.0	0	+	185511055	185520786	0	11	337,146,142,102,108,91,124,126,111,185,364,	0,1535,1918,2183,2460,2733,3123,3780,4278,4564,9367,
3	185512456	185520786	ggo_retrop04158.1	0	+	185512456	185520786	0	8	280,142,102,108,1173,111,185,364,	0,517,782,1059,1332,2877,3163,7966,
3	188363496	188363670	ggo_retrop04164.0	0	+	188363496	188363670	0	1	174,	0,
3	199904063	199905027	ggo_retrop04179.0	0	+	199904063	199905027	0	1	964,	0,
4	408143	419398	ggoiretrom33050.0	0	-	408143	419398	0	2	2244,173,	0,11082,
4	25638495	25639935	ggo_retrop04211.0	0	+	25638495	25639935	0	1	1440,	0,
4	39780883	39782410	ggo_retrop04220.0	0	+	39780883	39782410	0	1	1527,	0,
4	42401415	42403987	ggo_retrop04224.0	0	+	42401415	42403987	0	1	2572,	0,
4	47185342	47363152	ggoiretrom32669.0	0	-	47185342	47363152	0	3	364,55,53,	0,109390,177757,
4	48151301	48151599	ggo_retrop04230.0	0	+	48151301	48151599	0	1	298,	0,
4	62202330	62203211	ggo_retrom04233.0	0	-	62202330	62203211	0	1	881,	0,
4	71597106	71598152	ggo_retrop04251.0	0	+	71597106	71598152	0	1	1046,	0,
4	88088328	88097602	ggo_retrom04276.0	0	-	88088328	88097602	0	2	1014,869,	0,8405,
4	88178510	88180337	ggo_retrom04277.0	0	-	88178510	88180337	0	1	1827,	0,
4	104952516	104953825	ggo_retrop04303.1	0	+	104952516	104953825	0	1	1309,	0,
4	104952968	104953864	ggo_retrop04303.0	0	+	104952968	104953864	0	1	896,	0,
4	119058940	119059156	ggoiretrom33172.0	0	-	119058940	119059156	0	1	216,	0,
4	123397761	123484659	ggoiretrom33742.0	0	-	123397761	123484659	0	2	1854,1768,	0,85130,
4	123397761	123484659	ggoiretrom33742.1	0	-	123397761	123484659	0	3	391,1367,1768,	0,487,85130,
4	126620602	126622547	ggoiretrom32793.0	0	-	126620602	126622547	0	1	1945,	0,
4	137707395	137707769	ggo_retrom04329.0	0	-	137707395	137707769	0	1	374,	0,
4	153413382	153413972	ggo_retrom04346.0	0	-	153413382	153413972	0	2	80,479,	0,111,
4	163946847	163947506	ggo_retrop04369.0	0	+	163946847	163947506	0	1	659,	0,
4	168634917	168636778	ggo_retrop04375.1	0	+	168634917	168636778	0	1	1861,	0,
4	175745622	175746917	ggo_retrom04369.0	0	-	175745622	175746917	0	1	1295,	0,
4	193831812	193833464	ggoiretrop33772.0	0	+	193831812	193833464	0	1	1652,	0,
5	15415603	15419219	ggo_retrop03320.0	0	+	15415603	15419219	0	1	3616,	0,
5	22201527	22202273	ggoiretrop26041.0	0	+	22201527	22202273	0	1	746,	0,
5	25223037	25224098	ggoiretrop27177.0	0	+	25223037	25224098	0	1	1061,	0,
5	30218218	30220821	ggo_retrom03437.0	0	-	30218218	30220821	0	1	2603,	0,
5	34641908	34642179	ggoiretrop28145.0	0	+	34641908	34642179	0	1	271,	0,
5	37374488	37374776	ggo_retrop03363.0	0	+	37374488	37374776	0	1	288,	0,
5	41284514	41284804	ggo_retrop03379.0	0	+	41284514	41284804	0	1	290,	0,
5	41507641	41508723	ggo_retrom03462.0	0	-	41507641	41508723	0	1	1082,	0,
5	48679736	48695012	ggoiretrop27255.0	0	+	48679736	48695012	0	3	142,2471,2395,	0,8537,12881,
5	48692454	48695012	ggoiretrop27255.1	0	+	48692454	48695012	0	1	2558,	0,
5	50114066	50115243	ggoiretrop26514.0	0	+	50114066	50115243	0	1	1177,	0,
5	53651680	53653363	ggo_retrom03485.0	0	-	53651680	53653363	0	1	1683,	0,
5	55904974	55905529	ggo_retrop03425.0	0	+	55904974	55905529	0	1	555,	0,
5	56060819	56085268	ggo_retrop03426.0	0	+	56060819	56085268	0	3	400,117,824,	0,1186,23625,
5	57040593	57041652	ggoiretrop26541.0	0	+	57040593	57041652	0	1	1059,	0,
5	59103886	59105788	ggoiretrom26273.0	0	-	59103886	59105788	0	1	1902,	0,
5	60176455	60178252	ggoiretrom26278.0	0	-	60176455	60178252	0	1	1797,	0,
5	62253127	62253794	ggo_retrop03440.0	0	+	62253127	62253794	0	1	667,	0,
5	62395814	62396666	ggo_retrom03517.0	0	-	62395814	62396666	0	1	852,	0,
5	82554696	82555569	ggo_retrom03540.0	0	-	82554696	82555569	0	1	873,	0,
5	105041408	105042292	ggo_retrop03481.0	0	+	105041408	105042292	0	1	884,	0,
5	118789560	118802451	ggoiretrop26650.0	0	+	118789560	118802451	0	1	12891,	0,
5	124895072	124896504	ggo_retrom03587.0	0	-	124895072	124896504	0	1	1432,	0,
5	124910553	124912766	ggo_retrom03588.0	0	-	124910553	124912766	0	1	2213,	0,
5	133732709	133779594	ggoiretrom26417.0	0	-	133732709	133779594	0	12	131,108,147,149,144,150,161,67,65,75,141,948,	0,9184,10354,10626,12360,13365,17644,21330,28962,35646,45093,45937,
5	133745069	133779594	ggoiretrom26417.1	0	-	133745069	133779594	0	8	144,150,48,67,172,75,141,948,	0,1005,5284,8970,16495,23286,32733,33577,
5	133778645	133779594	ggoiretrom26417.2	0	-	133778645	133779594	0	1	949,	0,
5	139011011	139013911	ggoiretrop26311.0	0	+	139011011	139013911	0	1	2900,	0,
5	140899892	140901118	ggoiretrop26762.1	0	+	140899892	140901118	0	1	1226,	0,
5	140899905	140900505	ggoiretrop26762.2	0	+	140899905	140900505	0	1	600,	0,
5	140900031	140900505	ggoiretrop26762.0	0	+	140900031	140900505	0	1	474,	0,
5	152969386	152970270	ggo_retrop03593.0	0	+	152969386	152970270	0	1	884,	0,
5	152988030	152994727	ggo_retrom03614.0	0	-	152988030	152994727	0	1	6697,	0,
5	157305486	157306085	ggo_retrom03618.0	0	-	157305486	157306085	0	1	599,	0,
5	161851887	161853097	ggoiretrom27262.0	0	-	161851887	161853097	0	1	1210,	0,
5	162753911	162756833	ggoiretrom26992.0	0	-	162753911	162756833	0	1	2922,	0,
5	164239144	164254963	ggo_retrop03612.0	0	+	164239144	164254963	0	2	69,513,	0,15306,
5	164239661	164254971	ggo_retrop03612.1	0	+	164239661	164254971	0	2	59,521,	0,14789,
5	164344033	164346007	ggoiretrop26824.0	0	+	164344033	164346007	0	1	1974,	0,
5	165901144	165901895	ggo_retrop03617.0	0	+	165901144	165901895	0	1	751,	0,
6	532089	533097	ggoiretrom29834.0	0	-	532089	533097	0	1	1008,	0,
6	3882369	3884237	ggo_retrop03626.0	0	+	3882369	3884237	0	2	92,1474,	0,394,
6	5914483	5917166	ggo_retrom03646.0	0	-	5914483	5917166	0	1	2683,	0,
6	8241281	8244337	ggo_retrop03636.0	0	+	8241281	8244337	0	3	518,30,1689,	0,1152,1367,
6	13052540	13053161	ggo_retrop03640.0	0	+	13052540	13053161	0	1	621,	0,
6	18269614	18270698	ggo_retrop03645.0	0	+	18269614	18270698	0	1	1084,	0,
6	19140926	19142863	ggo_retrom03668.0	0	-	19140926	19142863	0	1	1937,	0,
6	25956145	25956904	ggoiretrop28955.0	0	+	25956145	25956904	0	1	759,	0,
6	27093452	27095613	ggo_retrop03674.0	0	+	27093452	27095613	0	2	87,1228,	0,933,
6	27094290	27095628	ggo_retrop03674.1	0	+	27094290	27095628	0	1	1338,	0,
6	27406329	27415060	ggo_retrop03677.0	0	+	27406329	27415060	0	2	122,1758,	0,6973,
6	28661596	28662971	ggo_retrop03685.0	0	+	28661596	28662971	0	1	1375,	0,
6	29977367	29978386	ggo_retrom03719.0	0	-	29977367	29978386	0	1	1019,	0,
6	30550881	30551262	ggo_retrom03729.0	0	-	30550881	30551262	0	1	381,	0,
6	30631272	30634444	ggoiretrom29910.0	0	-	30631272	30634444	0	1	3172,	0,
6	31667434	31672468	ggo_retrop03726.0	0	+	31667434	31672468	0	4	193,109,111,2063,	0,2166,2549,2971,
6	32713336	32715691	ggo_retrop03731.0	0	+	32713336	32715691	0	1	2355,	0,
6	32726912	32729170	ggo_retrop03732.0	0	+	32726912	32729170	0	1	2258,	0,
6	35711044	35711250	ggoiretrop30697.0	0	+	35711044	35711250	0	1	206,	0,
6	40200146	40208714	ggo_retrop03759.0	0	+	40200146	40208714	0	1	8568,	0,
6	51332642	51334258	ggo_retrom03775.1	0	-	51332642	51334258	0	1	1616,	0,
6	51332953	51334065	ggo_retrom03775.0	0	-	51332953	51334065	0	1	1112,	0,
6	64291397	64292432	ggoiretrom28447.0	0	-	64291397	64292432	0	1	1035,	0,
6	64895504	64897845	ggo_retrop03790.0	0	+	64895504	64897845	0	2	1812,225,	0,2116,
6	70862421	70862807	ggo_retrop03794.0	0	+	70862421	70862807	0	1	386,	0,
6	71284924	71286934	ggo_retrop03795.0	0	+	71284924	71286934	0	1	2010,	0,
6	89143166	89143384	ggoiretrop29211.0	0	+	89143166	89143384	0	1	218,	0,
6	98598950	98601325	ggoiretrop30501.0	0	+	98598950	98601325	0	1	2375,	0,
6	116317491	116318641	ggo_retrop03849.0	0	+	116317491	116318641	0	1	1150,	0,
6	118963548	118968200	ggo_retrop03851.0	0	+	118963548	118968200	0	1	4652,	0,
6	123237186	123237320	ggoiretrom28547.0	0	-	123237186	123237320	0	1	134,	0,
6	135292704	135292847	ggoiretrom27869.0	0	-	135292704	135292847	0	1	143,	0,
6	144207865	144208971	ggoiretrop29582.0	0	+	144207865	144208971	0	1	1106,	0,
6	150568767	150570989	ggo_retrop03888.0	0	+	150568767	150570989	0	2	619,1156,	0,1066,
6	154317868	154318538	ggo_retrom03907.0	0	-	154317868	154318538	0	1	670,	0,
6	160899255	160902087	ggo_retrom03917.0	0	-	160899255	160902087	0	1	2832,	0,
7	4859010	4866246	ggo_retrom03138.0	0	-	4859010	4866246	0	1	7236,	0,
7	6472959	6474105	ggo_retrom03142.0	0	-	6472959	6474105	0	1	1146,	0,
7	7798577	7799186	ggoiretrom25335.0	0	-	7798577	7799186	0	1	609,	0,
7	12563695	12564382	ggo_retrop03007.0	0	+	12563695	12564382	0	1	687,	0,
7	23777361	23778189	ggo_retrop03022.0	0	+	23777361	23778189	0	1	828,	0,
7	23850202	23851255	ggoiretrom24396.0	0	-	23850202	23851255	0	1	1053,	0,
7	39414931	39416560	ggoiretrom24439.1	0	-	39414931	39416560	0	1	1629,	0,
7	39414931	39416560	ggoiretrom24439.2	0	-	39414931	39416560	0	2	784,748,	0,881,
7	39414935	39415987	ggoiretrom24439.0	0	-	39414935	39415987	0	2	780,175,	0,877,
7	45451428	45451580	ggo_retrop03050.0	0	+	45451428	45451580	0	1	152,	0,
7	46841405	46842188	ggo_retrop03051.0	0	+	46841405	46842188	0	1	783,	0,
7	49989522	49992239	ggo_retrop03074.0	0	+	49989522	49992239	0	1	2717,	0,
7	56935823	56936804	ggo_retrom03211.0	0	-	56935823	56936804	0	1	981,	0,
7	57429075	57429791	ggo_retrop03094.0	0	+	57429075	57429791	0	1	716,	0,
7	60829669	60831368	ggo_retrop03110.0	0	+	60829669	60831368	0	1	1699,	0,
7	61572251	61573137	ggo_retrop03113.0	0	+	61572251	61573137	0	1	886,	0,
7	61629062	61631791	ggo_retrop03114.0	0	+	61629062	61631791	0	1	2729,	0,
7	63426477	63426783	ggo_retrom03256.0	0	-	63426477	63426783	0	1	306,	0,
7	63487920	63488287	ggoiretrom25575.0	0	-	63487920	63488287	0	1	367,	0,
7	70773825	70775036	ggo_retrom03263.0	0	-	70773825	70775036	0	1	1211,	0,
7	72286985	72287535	ggo_retrom03265.0	0	-	72286985	72287535	0	1	550,	0,
7	73400776	73432457	ggo_retrom03268.0	0	-	73400776	73432457	0	2	3464,245,	0,31436,
7	119002459	119003155	ggoiretrop24697.0	0	+	119002459	119003155	0	1	696,	0,
7	120725308	120726529	ggoiretrom25624.0	0	-	120725308	120726529	0	1	1221,	0,
7	127266480	127268428	ggo_retrop03195.0	0	+	127266480	127268428	0	1	1948,	0,
7	131210345	131210961	ggo_retrom03341.0	0	-	131210345	131210961	0	1	616,	0,
7	132853179	132886264	ggo_retrop03201.0	0	+	132853179	132886264	0	3	50,662,952,	0,14268,32133,
7	137524794	137525319	ggo_retrom03348.0	0	-	137524794	137525319	0	1	525,	0,
7	138630589	138631652	ggoiretrop24446.0	0	+	138630589	138631652	0	1	1063,	0,
8	11456359	11472582	ggoiretrop19172.0	0	+	11456359	11472582	0	6	75,140,353,197,4092,517,	0,1730,4935,8858,11613,15706,
8	11456767	11472582	ggoiretrop19172.1	0	+	11456767	11472582	0	6	211,140,353,197,4092,517,	0,1322,4527,8450,11205,15298,
8	20696547	20697799	ggoiretrop19183.0	0	+	20696547	20697799	0	1	1252,	0,
8	33324983	33325494	ggo_retrop02412.0	0	+	33324983	33325494	0	1	511,	0,
8	35043577	35043845	ggo_retrop02414.0	0	+	35043577	35043845	0	1	268,	0,
8	37895931	37900110	ggoiretrop19615.0	0	+	37895931	37900110	0	2	385,2872,	0,1307,
8	37945642	37948272	ggoiretrom19370.0	0	-	37945642	37948272	0	1	2630,	0,
8	38648503	38649301	ggo_retrom02557.0	0	-	38648503	38649301	0	1	798,	0,
8	54375874	54377957	ggo_retrom02580.0	0	-	54375874	54377957	0	1	2083,	0,
8	65042884	65042987	ggo_retrom02590.0	0	-	65042884	65042987	0	1	103,	0,
8	67452000	67452974	ggo_retrop02456.0	0	+	67452000	67452974	0	1	974,	0,
8	72381536	72388594	ggo_retrop02465.0	0	+	72381536	72388594	0	3	307,106,2075,	0,2568,4983,
8	86585081	86586839	ggo_retrom02661.0	0	-	86585081	86586839	0	1	1758,	0,
8	106029974	106031183	ggo_retrom02686.0	0	-	106029974	106031183	0	1	1209,	0,
8	124196563	124198956	ggoiretrop20035.0	0	+	124196563	124198956	0	1	2393,	0,
8	143151738	143151914	ggo_retrop02526.0	0	+	143151738	143151914	0	1	176,	0,
9	6070471	6075017	ggo_retrom01554.0	0	-	6070471	6075017	0	2	3302,129,	0,4417,
9	6070471	6075017	ggo_retrom01554.1	0	-	6070471	6075017	0	1	4546,	0,
9	8893786	8894124	ggo_retrop01434.0	0	+	8893786	8894124	0	1	338,	0,
9	19438131	19439717	ggo_retrop01440.0	0	+	19438131	19439717	0	1	1586,	0,
9	21732656	21737000	ggo_retrom01581.0	0	-	21732656	21737000	0	1	4344,	0,
9	22428102	22428854	ggo_retrop01448.0	0	+	22428102	22428854	0	1	752,	0,
9	34285461	34286460	ggo_retrop01460.0	0	+	34285461	34286460	0	1	999,	0,
9	34337920	34339197	ggoiretrom11779.0	0	-	34337920	34339197	0	1	1277,	0,
9	36177723	36178409	ggo_retrop01469.0	0	+	36177723	36178409	0	1	686,	0,
9	38698802	38700580	ggoiretrop11445.0	0	+	38698802	38700580	0	1	1778,	0,
9	39218039	39242178	ggo_retrop01478.0	0	+	39218039	39242178	0	2	85,2535,	0,21604,
9	39236556	39241733	ggo_retrop01478.1	0	+	39236556	39241733	0	2	70,2090,	0,3087,
9	39329843	39330861	ggo_retrop01480.0	0	+	39329843	39330861	0	1	1018,	0,
9	43901436	43902524	ggo_retrom01625.0	0	-	43901436	43902524	0	1	1088,	0,
9	44322291	44323829	ggo_retrop01498.1	0	+	44322291	44323829	0	2	509,1028,	0,510,
9	44322360	44323829	ggo_retrop01498.0	0	+	44322360	44323829	0	2	440,1028,	0,441,
9	50292953	50297458	ggo_retrop01506.0	0	+	50292953	50297458	0	1	4505,	0,
9	50526462	50527976	ggo_retrom01644.0	0	-	50526462	50527976	0	1	1514,	0,
9	68978094	68978928	ggo_retrop01521.0	0	+	68978094	68978928	0	1	834,	0,
9	69977999	69978317	ggoiretrop12459.0	0	+	69977999	69978317	0	1	318,	0,
9	70158025	70158411	ggoiretrop11496.1	0	+	70158025	70158411	0	1	386,	0,
9	71371865	71372365	ggoiretrop11502.0	0	+	71371865	71372365	0	1	500,	0,
9	74761700	74781491	ggoiretrom12281.0	0	+	74761700	74781491	0	4	88,54,964,728,	0,1040,17564,19063,
9	74779253	74781480	ggoiretrom12281.2	0	+	74779253	74781480	0	2	975,717,	0,1510,
9	83590122	83590469	ggoiretrom11878.0	0	-	83590122	83590469	0	1	347,	0,
9	83805113	83808018	ggoiretrom11488.0	0	-	83805113	83808018	0	1	2905,	0,
9	108560195	108563468	ggo_retrop01592.0	0	+	108560195	108563468	0	1	3273,	0,
9	116622444	116623411	ggoiretrop12019.0	0	+	116622444	116623411	0	1	967,	0,
X	14152661	14153165	ggo_retrop02719.0	0	+	14152661	14153165	0	1	504,	0,
X	22120573	22122113	ggoiretrop21533.0	0	+	22120573	22122113	0	1	1540,	0,
X	22556783	22558279	ggo_retrop02725.0	0	+	22556783	22558279	0	1	1496,	0,
X	23288082	23290389	ggoiretrop23007.0	0	+	23288082	23290389	0	1	2307,	0,
X	25090370	25090962	ggo_retrom02903.0	0	-	25090370	25090962	0	1	592,	0,
X	25951896	25952400	ggo_retrom02905.0	0	-	25951896	25952400	0	1	504,	0,
X	27813037	27814630	ggo_retrom02908.0	0	-	27813037	27814630	0	1	1593,	0,
X	28345378	28347466	ggo_retrom02909.0	0	-	28345378	28347466	0	1	2088,	0,
X	31496765	31497561	ggo_retrom02913.0	0	-	31496765	31497561	0	1	796,	0,
X	33613520	33613965	ggoiretrop22074.0	0	+	33613520	33613965	0	1	445,	0,
X	37636785	37637470	ggo_retrom02915.0	0	-	37636785	37637470	0	1	685,	0,
X	37724050	37724919	ggo_retrom02916.0	0	-	37724050	37724919	0	1	869,	0,
X	46464318	46465006	ggoiretrop22102.0	0	+	46464318	46465006	0	1	688,	0,
X	48635132	48635533	ggoiretrop21774.0	0	+	48635132	48635533	0	1	401,	0,
X	48672385	48675460	ggo_retrom02948.0	0	-	48672385	48675460	0	1	3075,	0,
X	52213680	52220323	ggo_retrom02957.0	0	-	52213680	52220323	0	2	1670,757,	0,5886,
X	52448813	52451251	ggo_retrop02787.0	0	+	52448813	52451251	0	1	2438,	0,
X	57419119	57423068	ggo_retrop02800.0	0	+	57419119	57423068	0	1	3949,	0,
X	57890355	57895190	ggoiretrom22540.0	0	-	57890355	57895190	0	1	4835,	0,
X	58040530	58042133	ggoiretrom22062.0	0	-	58040530	58042133	0	1	1603,	0,
X	58494476	58499581	ggoiretrop21579.0	0	+	58494476	58499581	0	1	5105,	0,
X	58799467	58803204	ggoiretrom22064.0	0	-	58799467	58803204	0	1	3737,	0,
X	60541367	60541505	ggo_retrom02975.0	0	-	60541367	60541505	0	1	138,	0,
X	60541367	60541505	ggo_retrom02975.1	0	-	60541367	60541505	0	1	138,	0,
X	60594429	60596807	ggoiretrom22547.0	0	-	60594429	60596807	0	1	2378,	0,
X	67289016	67291426	ggo_retrop02817.0	0	+	67289016	67291426	0	1	2410,	0,
X	72469402	72471043	ggoiretrom23185.0	0	-	72469402	72471043	0	1	1641,	0,
X	72905147	72907391	ggoiretrom22600.0	0	-	72905147	72907391	0	1	2244,	0,
X	75063221	75063472	ggo_retrom03013.0	0	-	75063221	75063472	0	1	251,	0,
X	82055145	82055903	ggoiretrop22208.0	0	+	82055145	82055903	0	1	758,	0,
X	98704101	98710482	ggo_retrop02876.0	0	+	98704101	98710482	0	2	94,2162,	0,4219,
X	100721366	100726669	ggo_retrom03051.0	0	-	100721366	100726669	0	1	5303,	0,
X	100902654	100913108	ggoiretrom23748.1	0	-	100902654	100913108	0	4	1533,102,90,51,	0,2973,8949,10403,
X	100902670	100913108	ggoiretrom23748.0	0	-	100902670	100913108	0	3	1517,90,51,	0,8933,10387,
X	101052490	101056729	ggoiretrom22658.0	0	-	101052490	101056729	0	1	4239,	0,
X	101052490	101064479	ggoiretrom22658.1	0	-	101052490	101064479	0	3	3564,74,151,	0,4743,11838,
X	104584961	104586132	ggo_retrop02893.0	0	+	104584961	104586132	0	1	1171,	0,
X	118340805	118343408	ggoiretrop22294.2	0	+	118340805	118343408	0	1	2603,	0,
X	118340923	118343408	ggoiretrop22294.1	0	+	118340923	118343408	0	1	2485,	0,
X	123532864	123535300	ggo_retrom03078.0	0	-	123532864	123535300	0	2	949,1407,	0,1029,
X	123532864	123535300	ggo_retrom03078.1	0	-	123532864	123535300	0	2	949,1399,	0,1037,
X	123532864	123535300	ggo_retrom03078.2	0	-	123532864	123535300	0	1	2436,	0,
X	123923170	123926248	ggo_retrom03079.0	0	-	123923170	123926248	0	2	1672,1313,	0,1765,
X	131198770	131198976	ggoiretrop23216.0	0	+	131198770	131198976	0	1	206,	0,
X	134437601	134439428	ggo_retrop02947.0	0	+	134437601	134439428	0	1	1827,	0,
X	137763848	137765057	ggo_retrop02952.0	0	+	137763848	137765057	0	1	1209,	0,
unplaced	41536936	41538517	ggoiretrom11370.0	0	-	41536936	41538517	0	1	1581,	0,
unplaced	96460824	96461497	ggoiretrop10925.0	0	+	96460824	96461497	0	1	673,	0,

## Sheet: Orangutan
# Supplemental Table S11: Retrocopy transcripts in orangutan (BED12 format)
Chromosome	Start	End	Transcript_ID	Score (not defined)	Strand	Thick Start (not defined)	Thick End (not defined)	Item_RGB (not defined)	Exon_count	Exon_sizes	Exon_starts
1	7614755	7621739	ppy_retrop18366.0	0	+	7614755	7621739	0	2	366,2794,	0,4190,
1	20924981	20936014	ppy_retrom17624.0	0	-	20924981	20936014	0	3	3381,59,388,	0,8925,10645,
1	20977846	20978283	ppy_retrom17629.0	0	-	20977846	20978283	0	1	437,	0,
1	21021097	21022834	ppy_retrom17630.0	0	-	21021097	21022834	0	1	1737,	0,
1	25274927	25275334	ppy_retrop18476.0	0	+	25274927	25275334	0	1	407,	0,
1	46563117	46563612	ppy_retrop18578.0	0	+	46563117	46563612	0	1	495,	0,
1	50109542	50109891	ppy_retrom17755.0	0	-	50109542	50109891	0	1	349,	0,
1	79411202	79411385	ppy_retrop18667.0	0	+	79411202	79411385	0	1	183,	0,
1	89790065	89792654	ppy_retrom17882.0	0	-	89790065	89792654	0	1	2589,	0,
1	91101667	91102476	ppy_retrop18709.0	0	+	91101667	91102476	0	1	809,	0,
1	99530750	99532483	ppy_retrom17992.0	0	-	99530750	99532483	0	1	1733,	0,
1	100059686	100060250	ppyiretrom40638.0	0	-	100059686	100060250	0	1	564,	0,
1	101794836	101800608	ppyiretrop42021.0	0	+	101794836	101800608	0	1	5772,	0,
1	106450568	106451486	ppy_retrom18073.0	0	-	106450568	106451486	0	1	918,	0,
1	124876707	124879322	ppy_retrom18164.0	0	-	124876707	124879322	0	3	147,214,1335,	0,492,1280,
1	128286828	128287332	ppyiretrom41160.0	0	-	128286828	128287332	0	1	504,	0,
1	135524120	135524357	ppyiretrom41230.0	0	-	135524120	135524357	0	1	237,	0,
1	139742270	139743994	ppy_retrop19053.0	0	+	139742270	139743994	0	1	1724,	0,
1	139857904	139868786	ppy_retrop19059.0	0	+	139857904	139868786	0	3	194,100,2109,	0,4477,8773,
1	144784928	144785448	ppy_retrom18249.0	0	-	144784928	144785448	0	1	520,	0,
1	170981705	170983559	ppy_retrop19120.0	0	+	170981705	170983559	0	1	1854,	0,
1	178621154	178621281	ppy_retrop19173.0	0	+	178621154	178621281	0	1	127,	0,
1	179485975	179486129	ppy_retrom18353.0	0	-	179485975	179486129	0	1	154,	0,
1	183156287	183156663	ppy_retrom18366.0	0	-	183156287	183156663	0	1	376,	0,
1	190339263	190340982	ppy_retrop19257.0	0	+	190339263	190340982	0	1	1719,	0,
1	190339263	190346855	ppy_retrop19257.1	0	+	190339263	190346855	0	3	2006,195,95,	0,6455,7497,
1	190602277	190603677	ppy_retrom18526.0	0	-	190602277	190603677	0	1	1400,	0,
1	192381864	192383726	ppy_retrop19265.0	0	+	192381864	192383726	0	1	1862,	0,
1	197218879	197219731	ppy_retrop19274.0	0	+	197218879	197219731	0	1	852,	0,
1	206493060	206493762	ppyiretrom42243.0	0	-	206493060	206493762	0	1	702,	0,
1	210684967	210685818	ppy_retrom18655.0	0	-	210684967	210685818	0	1	851,	0,
1	221664215	221664993	ppy_retrop19476.0	0	+	221664215	221664993	0	1	778,	0,
1	221701416	221701985	ppy_retrom18702.0	0	-	221701416	221701985	0	1	569,	0,
10	724249	724340	ppy_retrom10298.0	0	-	724249	724340	0	1	91,	0,
10	5799711	5801049	ppy_retrop10463.0	0	+	5799711	5801049	0	1	1338,	0,
10	6190098	6191343	ppy_retrom10310.0	0	-	6190098	6191343	0	1	1245,	0,
10	6190098	6220265	ppy_retrom10310.1	0	-	6190098	6220265	0	7	438,191,79,162,109,43,306,	0,20114,22307,24989,25962,27726,29861,
10	6190098	6222104	ppy_retrom10310.2	0	-	6190098	6222104	0	8	438,191,79,162,109,43,221,824,	0,20114,22307,24989,25962,27726,29861,31182,
10	8467624	8467986	ppy_retrom10314.0	0	-	8467624	8467986	0	1	362,	0,
10	41951480	41962666	ppy_retrom10418.0	0	-	41951480	41962666	0	3	1843,59,132,	0,9231,11054,
10	41951480	41962666	ppy_retrom10418.2	0	-	41951480	41962666	0	3	1843,59,132,	0,9231,11054,
10	41951480	41973858	ppy_retrom10418.1	0	-	41951480	41973858	0	4	1843,59,135,11,	0,9231,11054,22367,
10	41951480	41975285	ppy_retrom10418.3	0	-	41951480	41975285	0	4	1843,59,135,17,	0,9231,11054,23788,
10	52062706	52063390	ppy_retrop10563.1	0	+	52062706	52063390	0	1	684,	0,
10	54892278	54893604	ppyiretrop20933.0	0	+	54892278	54893604	0	2	14,1307,	0,19,
10	57387262	57387603	ppyiretrop20971.0	0	+	57387262	57387603	0	1	341,	0,
10	61690535	61692881	ppyiretrop21014.0	0	+	61690535	61692881	0	1	2346,	0,
10	77668684	77669936	ppy_retrop10664.0	0	+	77668684	77669936	0	1	1252,	0,
10	84604648	84606831	ppy_retrop10678.0	0	+	84604648	84606831	0	1	2183,	0,
10	86493190	86493557	ppy_retrom10571.0	0	-	86493190	86493557	0	1	367,	0,
10	91398888	91399498	ppy_retrom10592.0	0	-	91398888	91399498	0	1	610,	0,
10	92734933	92737928	ppy_retrom10600.0	0	-	92734933	92737928	0	1	2995,	0,
10	95126604	95127858	ppy_retrom10610.0	0	-	95126604	95127858	0	1	1254,	0,
10	99239138	99240567	ppy_retrop10734.0	0	+	99239138	99240567	0	1	1429,	0,
10	100743184	100743667	ppy_retrop10738.0	0	+	100743184	100743667	0	1	483,	0,
10	110289897	110290517	ppy_retrom10657.0	0	-	110289897	110290517	0	1	620,	0,
10	113525892	113526467	ppyiretrop21570.0	0	+	113525892	113526467	0	1	575,	0,
10	119056892	119057104	ppyiretrop21600.0	0	+	119056892	119057104	0	1	212,	0,
10	123984261	123984561	ppy_retrom10693.0	0	-	123984261	123984561	0	1	300,	0,
10	124507650	124508216	ppy_retrom10704.0	0	-	124507650	124508216	0	1	566,	0,
10_random	33182601	33185975	ppyiretrom04728.0	0	-	33182601	33185975	0	1	3374,	0,
10_random	36609005	36609403	ppyiretrom04773.0	0	-	36609005	36609403	0	1	398,	0,
10_random	36981814	36984185	ppy_retrom02700.0	0	-	36981814	36984185	0	1	2371,	0,
11	10768171	10769054	ppyiretrop18182.0	0	+	10768171	10769054	0	1	883,	0,
11	24852938	24855128	ppy_retrom09401.0	0	-	24852938	24855128	0	1	2190,	0,
11	52940112	52940914	ppyiretrop18937.0	0	+	52940112	52940914	0	1	802,	0,
11	58991878	58992596	ppy_retrom09504.0	0	-	58991878	58992596	0	1	718,	0,
11	61053512	61053924	ppy_retrom09522.0	0	-	61053512	61053924	0	1	412,	0,
11	63964690	63966462	ppy_retrop09801.0	0	+	63964690	63966462	0	1	1772,	0,
11	66915755	66916856	ppy_retrop10117.0	0	+	66915755	66916856	0	1	1101,	0,
11	69868548	69871808	ppy_retrom09841.0	0	-	69868548	69871808	0	1	3260,	0,
11	70133810	70134075	ppy_retrom09850.0	0	-	70133810	70134075	0	1	265,	0,
11	73228448	73228531	ppy_retrom09870.0	0	-	73228448	73228531	0	1	83,	0,
11	108924008	108968574	ppy_retrop10277.0	0	+	108924008	108968574	0	12	156,205,224,116,103,129,161,168,138,183,111,944,	0,3728,19036,19440,20214,25408,26319,27728,39591,40629,42081,43622,
11	108943567	108968566	ppy_retrop10277.1	0	+	108943567	108968566	0	9	8,103,129,161,168,138,183,111,936,	0,655,5849,6760,8169,20032,21070,22522,24063,
11	115503829	115504981	ppy_retrop10290.0	0	+	115503829	115504981	0	1	1152,	0,
11	119920020	119921093	ppy_retrop10296.0	0	+	119920020	119921093	0	1	1073,	0,
11	122104136	122106998	ppy_retrop10434.0	0	+	122104136	122106998	0	1	2862,	0,
11	127200525	127201605	ppy_retrom10262.0	0	-	127200525	127201605	0	1	1080,	0,
12	9775410	9786324	ppyiretrom24202.0	0	-	9775410	9786324	0	3	2652,104,1523,	0,4464,9391,
12	9775410	9791935	ppyiretrom24202.1	0	-	9775410	9791935	0	5	2652,104,185,64,108,	0,4464,9391,15274,16417,
12	12720558	12768908	ppy_retrom11823.0	0	-	12720558	12768908	0	3	692,198,361,	0,3214,47989,
12	22103789	22105030	ppyiretrop24979.0	0	+	22103789	22105030	0	1	1241,	0,
12	46828546	46841757	ppy_retrop12234.0	0	+	46828546	46841757	0	2	122,1646,	0,11565,
12	48560544	48561836	ppyiretrom24731.0	0	-	48560544	48561836	0	1	1292,	0,
12	49063950	49064696	ppy_retrop12262.0	0	+	49063950	49064696	0	1	746,	0,
12	49400686	49401136	ppy_retrom11989.0	0	-	49400686	49401136	0	1	450,	0,
12	50324256	50325071	ppy_retrop12274.0	0	+	50324256	50325071	0	1	815,	0,
12	56184066	56184418	ppy_retrom12044.0	0	-	56184066	56184418	0	1	352,	0,
12	56284269	56285688	ppy_retrop12412.0	0	+	56284269	56285688	0	1	1419,	0,
12	57782031	57782505	ppy_retrom12047.0	0	-	57782031	57782505	0	1	474,	0,
12	63817294	63819676	ppy_retrop12477.0	0	+	63817294	63819676	0	1	2382,	0,
12	90397128	90398354	ppy_retrom12113.0	0	-	90397128	90398354	0	1	1226,	0,
12	105625721	105626081	ppy_retrop12585.0	0	+	105625721	105626081	0	1	360,	0,
12	106097848	106099250	ppyiretrop26220.0	0	+	106097848	106099250	0	1	1402,	0,
12	112248065	112248401	ppy_retrop12609.0	0	+	112248065	112248401	0	1	336,	0,
12	119057531	119057990	ppy_retrom12209.0	0	-	119057531	119057990	0	1	459,	0,
12	121362040	121362204	ppyiretrop26408.0	0	+	121362040	121362204	0	1	164,	0,
12	122462727	122463321	ppy_retrop12634.0	0	+	122462727	122463321	0	1	594,	0,
12	135935912	135936150	ppy_retrop12665.0	0	+	135935912	135936150	0	1	238,	0,
13	21841867	21842288	ppy_retrom08878.0	0	-	21841867	21842288	0	1	421,	0,
13	27059133	27060585	ppyiretrop17378.0	0	+	27059133	27060585	0	2	174,422,	0,1030,
13	27652244	27655014	ppy_retrop09185.0	0	+	27652244	27655014	0	1	2770,	0,
13	29949383	29950060	ppyiretrop17433.0	0	+	29949383	29950060	0	1	677,	0,
13	36282668	36283041	ppy_retrom08931.0	0	-	36282668	36283041	0	1	373,	0,
13	36899794	36902060	ppy_retrom08940.0	0	-	36899794	36902060	0	1	2266,	0,
13	40578260	40578756	ppy_retrop09217.0	0	+	40578260	40578756	0	1	496,	0,
13	55490662	55491033	ppyiretrom17262.0	0	-	55490662	55491033	0	1	371,	0,
13	56632960	56634094	ppyiretrom17267.0	0	-	56632960	56634094	0	1	1134,	0,
13	109135345	109135768	ppy_retrop09365.0	0	+	109135345	109135768	0	1	423,	0,
13_random	1088636	1089576	ppy_retrom00521.0	0	-	1088636	1089576	0	1	940,	0,
13_random	1160234	1160722	ppy_retrop00615.0	0	+	1160234	1160722	0	1	488,	0,
14	18743373	18744502	ppy_retrop07468.0	0	+	18743373	18744502	0	1	1129,	0,
14	21123102	21123473	ppy_retrom07525.0	0	-	21123102	21123473	0	1	371,	0,
14	26210074	26210451	ppy_retrom07553.0	0	-	26210074	26210451	0	1	377,	0,
14	34293762	34302152	ppy_retrom07579.0	0	-	34293762	34302152	0	3	866,86,2875,	0,5347,5515,
14	38985439	38987394	ppy_retrop07822.0	0	+	38985439	38987394	0	1	1955,	0,
14	46921222	46921897	ppy_retrom07619.0	0	-	46921222	46921897	0	1	675,	0,
14	50005683	50006352	ppy_retrop07860.0	0	+	50005683	50006352	0	1	669,	0,
14	50024408	50024792	ppy_retrom07635.0	0	-	50024408	50024792	0	1	384,	0,
14	50024408	50024792	ppy_retrom07635.1	0	-	50024408	50024792	0	1	384,	0,
14	50319665	50323515	ppy_retrop07868.0	0	+	50319665	50323515	0	2	49,3701,	0,149,
14	50319665	50323515	ppy_retrop07868.1	0	+	50319665	50323515	0	1	3850,	0,
14	55847486	55848309	ppy_retrop07879.0	0	+	55847486	55848309	0	1	823,	0,
14	62015326	62019276	ppyiretrom14451.0	0	-	62015326	62019276	0	1	3950,	0,
14	65443995	65445985	ppy_retrop07948.0	0	+	65443995	65445985	0	1	1990,	0,
14	74749960	74751055	ppy_retrom07763.0	0	-	74749960	74751055	0	1	1095,	0,
14	78877597	78878199	ppy_retrom07797.0	0	-	78877597	78878199	0	1	602,	0,
14	82533208	82533388	ppy_retrop08000.0	0	+	82533208	82533388	0	1	180,	0,
14	95997475	95998094	ppy_retrop08030.0	0	+	95997475	95998094	0	1	619,	0,
14	103266849	103267039	ppyiretrop15529.0	0	+	103266849	103267039	0	1	190,	0,
14	107454058	107669599	ppy_retrom07904.0	0	-	107454058	107669599	0	7	445,330,45,36,15,294,31,	0,542,990,1473,109851,110258,215510,
14_random	1745912	1747896	ppy_retrop00298.0	0	+	1745912	1747896	0	1	1984,	0,
14_random	3909714	3910298	ppy_retrom00264.0	0	-	3909714	3910298	0	1	584,	0,
15	19709830	19712531	ppy_retrop07091.0	0	+	19709830	19712531	0	1	2701,	0,
15	28262402	28263994	ppyiretrom12767.0	0	-	28262402	28263994	0	1	1592,	0,
15	37281942	37283375	ppyiretrom12923.0	0	-	37281942	37283375	0	1	1433,	0,
15	37281942	37283990	ppyiretrom12923.1	0	-	37281942	37283990	0	3	1298,59,314,	0,1481,1734,
15	38055528	38056806	ppyiretrom12942.0	0	-	38055528	38056806	0	1	1278,	0,
15	41644109	41646626	ppyiretrop13256.1	0	+	41644109	41646626	0	1	2517,	0,
15	45899690	45900684	ppy_retrom07222.0	0	-	45899690	45900684	0	1	994,	0,
15	62944079	62944482	ppy_retrom07290.0	0	-	62944079	62944482	0	1	403,	0,
15	85851221	85858459	ppy_retrom07390.0	0	-	85851221	85858459	0	1	7238,	0,
15	86954737	86958434	ppyiretrop13848.0	0	+	86954737	86958434	0	1	3697,	0,
15	87789793	87790315	ppy_retrom07416.0	0	-	87789793	87790315	0	1	522,	0,
15	89303759	89304837	ppy_retrop07402.0	0	+	89303759	89304837	0	1	1078,	0,
15_random	2505354	2506445	ppy_retrom00832.0	0	-	2505354	2506445	0	1	1091,	0,
15_random	4679906	4681945	ppy_retrop00958.0	0	+	4679906	4681945	0	1	2039,	0,
16	28958215	28960299	ppyiretrom11492.1	0	-	28958215	28960299	0	1	2084,	0,
16	62023500	62025290	ppyiretrop12099.0	0	+	62023500	62025290	0	1	1790,	0,
16	69596698	69599921	ppyiretrom11959.1	0	-	69596698	69599921	0	2	2566,92,	0,3131,
16	69596698	69600180	ppyiretrom11959.0	0	-	69596698	69600180	0	2	2566,351,	0,3131,
16	69596698	69610445	ppyiretrom11959.2	0	-	69596698	69610445	0	3	2566,94,66,	0,3131,13681,
16	74234756	74235629	ppy_retrop06824.0	0	+	74234756	74235629	0	1	873,	0,
16	75644629	75645158	ppy_retrom06879.0	0	-	75644629	75645158	0	1	529,	0,
16_random	4903092	4904201	ppyiretrom01610.0	0	-	4903092	4904201	0	1	1109,	0,
16_random	5522054	5523200	ppyiretrom01635.0	0	-	5522054	5523200	0	1	1146,	0,
16_random	8875322	8875641	ppy_retrom01069.0	0	-	8875322	8875641	0	1	319,	0,
17	2198050	2199316	ppy_retrop06007.0	0	+	2198050	2199316	0	1	1266,	0,
17	18942648	18944424	ppyiretrom10178.0	0	-	18942648	18944424	0	1	1776,	0,
17	19571003	19610302	ppyiretrop10566.0	0	+	19571003	19610302	0	20	196,237,166,1079,680,134,243,216,41,286,207,132,105,51,57,75,118,170,308,826,	0,461,1343,2172,3345,4371,4636,34010,34391,35257,35702,36044,36341,36858,37218,37355,37539,37807,38055,38473,
17	19571317	19610302	ppyiretrop10566.1	0	+	19571317	19610302	0	19	384,723,1853,134,243,216,41,286,207,132,105,51,57,75,118,170,54,75,826,	0,1029,1858,4057,4322,33696,34077,34943,35388,35730,36027,36544,36904,37041,37225,37493,37741,37974,38159,
17	21905568	21906839	ppy_retrom06270.0	0	-	21905568	21906839	0	1	1271,	0,
17	25875427	25876733	ppyiretrom10344.1	0	-	25875427	25876733	0	1	1306,	0,
17	30235446	30236897	ppyiretrom10428.0	0	-	30235446	30236897	0	1	1451,	0,
17	33450917	33483952	ppy_retrop06236.0	0	+	33450917	33483952	0	2	114,1294,	0,31741,
17	33658464	33659543	ppyiretrop10803.0	0	+	33658464	33659543	0	1	1079,	0,
17	38573007	38575274	ppyiretrom10562.0	0	-	38573007	38575274	0	1	2267,	0,
17	46674511	46675223	ppyiretrop10985.0	0	+	46674511	46675223	0	1	712,	0,
17	57880424	57881298	ppyiretrom10873.0	0	-	57880424	57881298	0	1	874,	0,
17_random	989620	990297	ppy_retrom01843.0	0	-	989620	990297	0	1	677,	0,
17_random	9499569	9500665	ppyiretrop03221.0	0	+	9499569	9500665	0	1	1096,	0,
17_random	12794791	12795081	ppyiretrom03145.0	0	-	12794791	12795081	0	1	290,	0,
17_random	15049745	15050527	ppy_retrom01954.0	0	-	15049745	15050527	0	1	782,	0,
18	20157211	20159655	ppy_retrom06910.0	0	-	20157211	20159655	0	1	2444,	0,
18	21017041	21017251	ppy_retrop06889.0	0	+	21017041	21017251	0	1	210,	0,
18	31227233	31227721	ppy_retrop06927.1	0	+	31227233	31227721	0	1	488,	0,
18	31227425	31227721	ppy_retrop06927.0	0	+	31227425	31227721	0	1	296,	0,
18	32149098	32149747	ppy_retrom06949.0	0	-	32149098	32149747	0	1	649,	0,
18	32797338	32798398	ppy_retrom06951.0	0	-	32797338	32798398	0	1	1060,	0,
18	69785202	69786590	ppy_retrop07017.0	0	+	69785202	69786590	0	1	1388,	0,
19	1113041	1113578	ppy_retrop03188.0	0	+	1113041	1113578	0	1	537,	0,
19	4118329	4118794	ppy_retrop03208.0	0	+	4118329	4118794	0	1	465,	0,
19	9981313	9981916	ppyiretrop06521.0	0	+	9981313	9981916	0	1	603,	0,
19	12485335	12485949	ppy_retrop03545.0	0	+	12485335	12485949	0	1	614,	0,
19	12518629	12519802	ppy_retrom03318.0	0	-	12518629	12519802	0	1	1173,	0,
19	30405331	30405912	ppy_retrom03815.0	0	-	30405331	30405912	0	1	581,	0,
19	41049476	41049998	ppy_retrop04186.0	0	+	41049476	41049998	0	1	522,	0,
19	41049576	41049998	ppy_retrop04186.1	0	+	41049576	41049998	0	1	422,	0,
19	43765980	43766697	ppy_retrom04007.0	0	-	43765980	43766697	0	1	717,	0,
19	51457202	51483172	ppyiretrom07059.0	0	-	51457202	51483172	0	2	3096,2944,	0,23026,
19	53590725	53592097	ppy_retrom04372.0	0	-	53590725	53592097	0	1	1372,	0,
19	56780414	56781090	ppy_retrop04618.0	0	+	56780414	56781090	0	1	676,	0,
19	60162567	60166144	ppy_retrop04834.0	0	+	60162567	60166144	0	1	3577,	0,
19	60337798	60339562	ppy_retrop04853.0	0	+	60337798	60339562	0	1	1764,	0,
19_random	4004881	4006475	ppyiretrom00847.0	0	-	4004881	4006475	0	1	1594,	0,
19_random	5593556	5594870	ppy_retrop00572.0	0	+	5593556	5594870	0	1	1314,	0,
1_random	19925697	19927178	ppy_retrop02429.0	0	+	19925697	19927178	0	1	1481,	0,
1_random	31819477	31819902	ppyiretrop04716.0	0	+	31819477	31819902	0	1	425,	0,
20	14874795	14875015	ppy_retrom04985.0	0	-	14874795	14875015	0	1	220,	0,
20	18545828	18549626	ppyiretrop08464.0	0	+	18545828	18549626	0	2	258,615,	0,3183,
20	29374563	29376178	ppy_retrom05049.0	0	-	29374563	29376178	0	1	1615,	0,
20	29481949	29515984	ppyiretrop08662.0	0	+	29481949	29515984	0	2	11,1223,	0,32812,
20	29514760	29515984	ppyiretrop08662.1	0	+	29514760	29515984	0	1	1224,	0,
20	31670193	31670673	ppy_retrom05072.0	0	-	31670193	31670673	0	1	480,	0,
20	41082421	41082569	ppyiretrom08152.0	0	-	41082421	41082569	0	1	148,	0,
20	51716102	51717144	ppyiretrom08379.0	0	-	51716102	51717144	0	1	1042,	0,
21	26657133	26658161	ppy_retrom02916.0	0	-	26657133	26658161	0	1	1028,	0,
21	35105339	35106532	ppyiretrop06067.0	0	+	35105339	35106532	0	1	1193,	0,
21	36929959	36931299	ppy_retrop03133.0	0	+	36929959	36931299	0	1	1340,	0,
21	37077429	37078524	ppy_retrop03135.0	0	+	37077429	37078524	0	1	1095,	0,
22	18156555	18185761	ppyiretrop05555.0	0	+	18156555	18185761	0	2	398,1926,	0,27280,
22	25605999	25607499	ppy_retrom02809.0	0	-	25605999	25607499	0	1	1500,	0,
22	25865953	25866526	ppyiretrop05665.0	0	+	25865953	25866526	0	1	573,	0,
22	26916804	26932463	ppy_retrop03024.0	0	+	26916804	26932463	0	2	211,1363,	0,14296,
22	35681386	35681954	ppy_retrop03058.0	0	+	35681386	35681954	0	1	568,	0,
22	36100493	36101483	ppy_retrom02856.0	0	-	36100493	36101483	0	1	990,	0,
22	36318831	36319153	ppy_retrop03061.0	0	+	36318831	36319153	0	1	322,	0,
22_random	2843044	2845177	ppyiretrom00170.0	0	-	2843044	2845177	0	1	2133,	0,
22_random	3265740	3280108	ppy_retrom00100.0	0	-	3265740	3280108	0	1	14368,	0,
22_random	3265740	3282246	ppy_retrom00100.1	0	-	3265740	3282246	0	2	6567,640,	0,15866,
22_random	3265740	3282246	ppy_retrom00100.2	0	-	3265740	3282246	0	2	6729,640,	0,15866,
2a	8989590	8991217	ppyiretrom15828.0	0	-	8989590	8991217	0	2	393,543,	0,1084,
2a	12666033	12666753	ppyiretrop15865.0	0	+	12666033	12666753	0	1	720,	0,
2a	17151957	17173814	ppyiretrop15925.1	0	+	17151957	17173814	0	11	93,5143,171,93,179,205,102,161,274,335,123,	0,1141,9586,10370,10749,13616,15010,19424,20292,20688,21734,
2a	25831308	25832448	ppy_retrom08556.0	0	-	25831308	25832448	0	1	1140,	0,
2a	25831549	25832448	ppy_retrom08556.1	0	-	25831549	25832448	0	1	899,	0,
2a	40699914	40701483	ppy_retrom08618.1	0	-	40699914	40701483	0	1	1569,	0,
2a	40700314	40700995	ppy_retrom08618.0	0	-	40700314	40700995	0	1	681,	0,
2a	47051479	47051760	ppyiretrom16234.0	0	-	47051479	47051760	0	1	281,	0,
2a	48738802	48739700	ppy_retrom08661.0	0	-	48738802	48739700	0	1	898,	0,
2a	52347499	52348177	ppy_retrop08990.1	0	+	52347499	52348177	0	1	678,	0,
2a	52347768	52348175	ppy_retrop08990.0	0	+	52347768	52348175	0	1	407,	0,
2a	79792648	79793137	ppyiretrom16507.0	0	-	79792648	79793137	0	1	489,	0,
2a	86349534	86350302	ppy_retrom08761.0	0	-	86349534	86350302	0	1	768,	0,
2a	91916208	91917940	ppy_retrom08789.0	0	-	91916208	91917940	0	1	1732,	0,
2a_random	1533097	1533637	ppyiretrop02346.0	0	+	1533097	1533637	0	1	540,	0,
2a_random	6362809	6363517	ppyiretrop02408.0	0	+	6362809	6363517	0	1	708,	0,
2a_random	10942415	10942993	ppyiretrop02448.0	0	+	10942415	10942993	0	1	578,	0,
2b	97630906	97633462	ppyiretrom22227.0	0	-	97630906	97633462	0	1	2556,	0,
2b_random	1226073	1227328	ppyiretrop02558.0	0	+	1226073	1227328	0	1	1255,	0,
3	4228068	4229001	ppyiretrop38578.0	0	+	4228068	4229001	0	1	933,	0,
3	10279856	10283497	ppyiretrop38637.0	0	+	10279856	10283497	0	1	3641,	0,
3	13047666	13050906	ppy_retrop17703.1	0	+	13047666	13050906	0	1	3240,	0,
3	18926566	18927751	ppy_retrom16443.0	0	-	18926566	18927751	0	1	1185,	0,
3	39118154	39123039	ppy_retrop17794.0	0	+	39118154	39123039	0	2	136,3619,	0,1266,
3	72689162	72689464	ppy_retrom16615.0	0	-	72689162	72689464	0	1	302,	0,
3	88724793	88726674	ppy_retrop17929.0	0	+	88724793	88726674	0	1	1881,	0,
3	97170575	97172086	ppy_retrop17958.0	0	+	97170575	97172086	0	1	1511,	0,
3	98279223	98280871	ppy_retrop17960.0	0	+	98279223	98280871	0	1	1648,	0,
3	110002315	110002484	ppy_retrom16919.0	0	-	110002315	110002484	0	1	169,	0,
3	114780015	114782184	ppy_retrom16962.0	0	-	114780015	114782184	0	1	2169,	0,
3	131681081	131683123	ppy_retrom17013.0	0	-	131681081	131683123	0	1	2042,	0,
3	136207980	136209775	ppy_retrom17022.0	0	-	136207980	136209775	0	1	1795,	0,
3	139183769	139184537	ppy_retrom17033.0	0	-	139183769	139184537	0	1	768,	0,
3	158787906	158788838	ppy_retrom17155.0	0	-	158787906	158788838	0	1	932,	0,
3	160318200	160333871	ppy_retrom17160.0	0	-	160318200	160333871	0	11	690,99,112,142,105,100,65,121,110,75,3824,	0,1381,1580,1931,2158,2375,4270,5129,10921,11459,11847,
3	163704653	163705950	ppy_retrop18151.0	0	+	163704653	163705950	0	1	1297,	0,
3	163839002	163842675	ppy_retrop18160.0	0	+	163839002	163842675	0	1	3673,	0,
3	182627317	182628256	ppyiretrom38747.0	0	-	182627317	182628256	0	1	939,	0,
3	182850928	182870811	ppy_retrom17240.0	0	-	182850928	182870811	0	3	603,190,1976,	0,6570,17907,
3	182868510	182870811	ppy_retrom17240.1	0	-	182868510	182870811	0	1	2301,	0,
3	188010040	188010434	ppy_retrop18214.0	0	+	188010040	188010434	0	1	394,	0,
3	199578155	199578721	ppy_retrop18241.0	0	+	199578155	199578721	0	1	566,	0,
3_random	3251310	3251819	ppy_retrom02124.0	0	-	3251310	3251819	0	1	509,	0,
3_random	5038502	5039623	ppy_retrom02137.0	0	-	5038502	5039623	0	1	1121,	0,
4	9967853	9968411	ppy_retrop17264.0	0	+	9967853	9968411	0	1	558,	0,
4	16018919	16021823	ppy_retrom16028.0	0	-	16018919	16021823	0	1	2904,	0,
4	40528019	40531342	ppyiretrop37225.0	0	+	40528019	40531342	0	1	3323,	0,
4	43090625	43095277	ppyiretrop37262.0	0	+	43090625	43095277	0	1	4652,	0,
4	48192821	48381698	ppy_retrom16063.0	0	-	48192821	48381698	0	4	298,55,76,74,	0,121878,184219,188803,
4	49209063	49209576	ppy_retrop17335.0	0	+	49209063	49209576	0	1	513,	0,
4	49459152	49475250	ppyiretrom35392.0	0	-	49459152	49475250	0	8	1156,107,108,111,42,63,117,161,	0,4137,5407,6577,6770,13185,14722,15937,
4	59936227	59937185	ppyiretrom35470.0	0	-	59936227	59937185	0	1	958,	0,
4	63243164	63243431	ppyiretrop37367.0	0	+	63243164	63243431	0	1	267,	0,
4	80237767	80238277	ppyiretrop37566.0	0	+	80237767	80238277	0	1	510,	0,
4	82722552	82731903	ppy_retrom16162.0	0	-	82722552	82731903	0	2	1244,733,	0,8618,
4	82826760	82828614	ppy_retrom16166.0	0	-	82826760	82828614	0	1	1854,	0,
4	87091383	87092613	ppy_retrop17437.0	0	+	87091383	87092613	0	1	1230,	0,
4	99944844	99946096	ppy_retrop17472.0	0	+	99944844	99946096	0	1	1252,	0,
4	118631404	118709193	ppy_retrom16234.1	0	-	118631404	118709193	0	3	1859,1367,1543,	0,1955,76246,
4	118631405	118637768	ppy_retrom16234.0	0	-	118631405	118637768	0	3	1858,1367,49,	0,1954,6314,
4	122045548	122047412	ppy_retrom16239.0	0	-	122045548	122047412	0	1	1864,	0,
4	158542335	158542847	ppy_retrom16292.0	0	-	158542335	158542847	0	1	512,	0,
4	158671757	158673337	ppy_retrop17603.0	0	+	158671757	158673337	0	1	1580,	0,
4	169822787	169825399	ppyiretrom36338.0	0	-	169822787	169825399	0	1	2612,	0,
4	178588866	178590055	ppy_retrop17655.0	0	+	178588866	178590055	0	1	1189,	0,
4_random	17832225	17833954	ppyiretrom03852.0	0	-	17832225	17833954	0	1	1729,	0,
4_random	19066350	19066837	ppy_retrom02272.0	0	-	19066350	19066837	0	1	487,	0,
5	1637709	1639704	ppy_retrop16501.0	0	+	1637709	1639704	0	1	1995,	0,
5	12784377	12784743	ppyiretrop34875.0	0	+	12784377	12784743	0	1	366,	0,
5	18209581	18209886	ppy_retrom15465.0	0	-	18209581	18209886	0	1	305,	0,
5	71095955	71100101	ppy_retrom15638.0	0	-	71095955	71100101	0	3	420,93,34,	0,1155,4112,
5	73584052	73584490	ppy_retrop16668.0	0	+	73584052	73584490	0	1	438,	0,
5	77409698	77410747	ppy_retrop16685.0	0	+	77409698	77410747	0	1	1049,	0,
5	117319096	117319472	ppyiretrom34267.0	0	-	117319096	117319472	0	1	376,	0,
5	123161314	123162600	ppy_retrop16805.0	0	+	123161314	123162600	0	1	1286,	0,
5	139763594	139764119	ppyiretrop35993.0	0	+	139763594	139764119	0	1	525,	0,
5	141301012	141301421	ppy_retrop16860.0	0	+	141301012	141301421	0	1	409,	0,
5	142396432	142396906	ppyiretrom34532.0	0	-	142396432	142396906	0	1	474,	0,
5	142401052	142401427	ppyiretrom34540.1	0	-	142401052	142401427	0	1	375,	0,
5	142833515	142835692	ppy_retrom15855.0	0	-	142833515	142835692	0	1	2177,	0,
5	143430016	143430529	ppy_retrom15857.0	0	-	143430016	143430529	0	1	513,	0,
5	149300382	149300639	ppy_retrop17116.0	0	+	149300382	149300639	0	1	257,	0,
5	152258770	152263174	ppy_retrom15891.0	0	-	152258770	152263174	0	2	992,140,	0,4264,
5	153819885	153820456	ppy_retrom15895.0	0	-	153819885	153820456	0	1	571,	0,
5	153819885	153825579	ppy_retrom15895.1	0	-	153819885	153825579	0	3	472,1420,292,	0,3442,5402,
5	159069373	159070157	ppy_retrop17147.0	0	+	159069373	159070157	0	1	784,	0,
5	171190720	171220709	ppy_retrom15925.0	0	-	171190720	171220709	0	7	9098,126,124,177,254,353,84,	0,10496,12844,15348,17499,20090,29905,
5	175633288	175633682	ppyiretrop36790.0	0	+	175633288	175633682	0	1	394,	0,
5	177318707	177318887	ppyiretrop36808.0	0	+	177318707	177318887	0	1	180,	0,
5	182408436	182410188	ppy_retrop17216.0	0	+	182408436	182410188	0	1	1752,	0,
5_random	4646678	4648396	ppy_retrop01742.0	0	+	4646678	4648396	0	1	1718,	0,
5_random	12750447	12751142	ppy_retrop01806.0	0	+	12750447	12751142	0	1	695,	0,
6	3886688	3887878	ppy_retrop15191.0	0	+	3886688	3887878	0	2	93,795,	0,395,
6	23495644	23497683	ppy_retrop15249.1	0	+	23495644	23497683	0	1	2039,	0,
6	27324221	27326350	ppyiretrop32773.0	0	+	27324221	27326350	0	2	101,1187,	0,942,
6	28711069	28712162	ppyiretrop32895.0	0	+	28711069	28712162	0	1	1093,	0,
6	28878887	28882579	ppy_retrop15734.0	0	+	28878887	28882579	0	2	172,2248,	0,1444,
6	28878887	28882579	ppy_retrop15734.1	0	+	28878887	28882579	0	2	172,2248,	0,1444,
6	31439899	31444632	ppy_retrop15992.1	0	+	31439899	31444632	0	4	198,109,111,1765,	0,2166,2546,2968,
6	31439902	31444557	ppy_retrop15992.0	0	+	31439902	31444557	0	4	195,109,111,1690,	0,2163,2543,2965,
6	32315879	32318234	ppy_retrop16011.0	0	+	32315879	32318234	0	1	2355,	0,
6	39322015	39322546	ppyiretrop33491.0	0	+	39322015	39322546	0	1	531,	0,
6	39994771	39995037	ppy_retrom15041.0	0	-	39994771	39995037	0	1	266,	0,
6	41101679	41102105	ppy_retrop16071.0	0	+	41101679	41102105	0	1	426,	0,
6	49941095	49942608	ppy_retrom15061.0	0	-	49941095	49942608	0	1	1513,	0,
6	73633511	73634605	ppyiretrom32311.0	0	-	73633511	73634605	0	1	1094,	0,
6	100358755	100361245	ppyiretrop34054.0	0	+	100358755	100361245	0	1	2490,	0,
6	102083565	102084035	ppyiretrop34084.0	0	+	102083565	102084035	0	1	470,	0,
6	110782616	110782895	ppy_retrom15212.0	0	-	110782616	110782895	0	1	279,	0,
6	118534076	118534796	ppy_retrom15259.0	0	-	118534076	118534796	0	1	720,	0,
6	118632639	118633531	ppy_retrom15275.0	0	-	118632639	118633531	0	1	892,	0,
6	120886307	120903393	ppy_retrop16319.0	0	+	120886307	120903393	0	5	284,227,772,151,2782,	0,1827,7290,12087,14304,
6	120893343	120903393	ppy_retrop16319.1	0	+	120893343	120903393	0	2	1026,4999,	0,5051,
6	120898045	120903393	ppy_retrop16319.2	0	+	120898045	120903393	0	1	5348,	0,
6	121404707	121405038	ppy_retrop16323.0	0	+	121404707	121405038	0	1	331,	0,
6	123949100	123949529	ppy_retrop16333.0	0	+	123949100	123949529	0	1	429,	0,
6	146284343	146285548	ppy_retrop16396.1	0	+	146284343	146285548	0	1	1205,	0,
6	152703950	152706741	ppy_retrop16437.0	0	+	152703950	152706741	0	2	707,1636,	0,1155,
6	152703950	152706741	ppy_retrop16437.1	0	+	152703950	152706741	0	1	2791,	0,
6	152891716	152892208	ppy_retrom15387.0	0	-	152891716	152892208	0	1	492,	0,
6	160735393	160738393	ppy_retrom15396.0	0	-	160735393	160738393	0	1	3000,	0,
6	163206391	163208147	ppy_retrom15416.0	0	-	163206391	163208147	0	1	1756,	0,
6_cox_hap1	1406100	1422116	ppy_retrom00057.0	0	-	1406100	1422116	0	2	1184,597,	0,15419,
7	3335173	3336845	ppy_retrop14131.0	0	+	3335173	3336845	0	1	1672,	0,
7	4898585	4901126	ppy_retrom13480.0	0	-	4898585	4901126	0	1	2541,	0,
7	6485852	6487064	ppy_retrom13489.0	0	-	6485852	6487064	0	1	1212,	0,
7	11825371	11857665	ppy_retrop14239.0	0	+	11825371	11857665	0	2	249,3447,	0,28847,
7	12318002	12318762	ppy_retrom13556.0	0	-	12318002	12318762	0	1	760,	0,
7	14296262	14297473	ppyiretrop30414.0	0	+	14296262	14297473	0	1	1211,	0,
7	22623012	22624164	ppyiretrop30463.0	0	+	22623012	22624164	0	1	1152,	0,
7	22924813	22926070	ppy_retrop14277.0	0	+	22924813	22926070	0	1	1257,	0,
7	23003988	23005867	ppy_retrom13601.0	0	-	23003988	23005867	0	1	1879,	0,
7	35041169	35042499	ppy_retrop14308.0	0	+	35041169	35042499	0	1	1330,	0,
7	60844205	60847693	ppy_retrop14437.0	0	+	60844205	60847693	0	2	131,3183,	0,305,
7	60844255	60847693	ppy_retrop14437.1	0	+	60844255	60847693	0	1	3438,	0,
7	60946149	60946972	ppy_retrom13772.0	0	-	60946149	60946972	0	1	823,	0,
7	66604542	66605543	ppy_retrop14458.0	0	+	66604542	66605543	0	1	1001,	0,
7	91272061	91272444	ppy_retrom13860.0	0	-	91272061	91272444	0	1	383,	0,
7	98762562	98763209	ppy_retrop14504.0	0	+	98762562	98763209	0	1	647,	0,
7	104712777	104713291	ppy_retrop14536.0	0	+	104712777	104713291	0	1	514,	0,
7	117886287	117886953	ppy_retrop14552.0	0	+	117886287	117886953	0	1	666,	0,
7	119585490	119586792	ppyiretrom30618.0	0	-	119585490	119586792	0	1	1302,	0,
7	131743942	131779847	ppy_retrop14634.0	0	+	131743942	131779847	0	3	66,662,846,	0,12629,35059,
7	136447599	136449192	ppy_retrom13989.0	0	-	136447599	136449192	0	1	1593,	0,
7	137479911	137480381	ppy_retrom13994.0	0	-	137479911	137480381	0	1	470,	0,
7	139755153	139755379	ppyiretrop31719.0	0	+	139755153	139755379	0	1	226,	0,
7	143390077	143390297	ppyiretrop32148.0	0	+	143390077	143390297	0	1	220,	0,
7_random	6999422	7000137	ppyiretrop03491.0	0	+	6999422	7000137	0	1	715,	0,
7_random	11617714	11618464	ppyiretrom03417.0	0	-	11617714	11618464	0	1	750,	0,
7_random	16809580	16812953	ppyiretrop03633.0	0	+	16809580	16812953	0	1	3373,	0,
8	29978346	29979880	ppy_retrop12789.0	0	+	29978346	29979880	0	1	1534,	0,
8	37957314	37961510	ppyiretrop26965.0	0	+	37957314	37961510	0	2	386,2888,	0,1308,
8	48970364	48972123	ppy_retrom12372.0	0	-	48970364	48972123	0	1	1759,	0,
8	65012985	65013197	ppyiretrop27185.0	0	+	65012985	65013197	0	1	212,	0,
8	76462000	76471103	ppy_retrop12944.0	0	+	76462000	76471103	0	5	374,106,2118,46,397,	0,3044,5442,8280,8706,
8	91023448	91026723	ppyiretrom26748.0	0	-	91023448	91026723	0	1	3275,	0,
8	107577440	107577742	ppy_retrom12535.0	0	+	107577440	107577742	0	1	302,	0,
8	132114928	132117634	ppyiretrop27845.0	0	+	132114928	132117634	0	1	2706,	0,
8	153183704	153184147	ppy_retrom12733.0	0	-	153183704	153184147	0	1	443,	0,
8_random	961238	963030	ppyiretrop02753.0	0	+	961238	963030	0	1	1792,	0,
8_random	1970516	1971073	ppyiretrom02628.0	0	-	1970516	1971073	0	1	557,	0,
8_random	8845893	8846259	ppyiretrop02815.0	0	+	8845893	8846259	0	1	366,	0,
9	23178217	23183748	ppy_retrom11135.0	0	-	23178217	23183748	0	2	2505,87,	0,5444,
9	25241411	25242936	ppy_retrop11186.0	0	+	25241411	25242936	0	1	1525,	0,
9	40765341	40769598	ppy_retrop11314.0	0	+	40765341	40769598	0	1	4257,	0,
9	42998403	43000477	ppy_retrop11444.0	0	+	42998403	43000477	0	1	2074,	0,
9	43161112	43162637	ppyiretrom23014.0	0	-	43161112	43162637	0	1	1525,	0,
9	47378838	47379053	ppy_retrop11465.0	0	+	47378838	47379053	0	1	215,	0,
9	56083439	56085210	ppy_retrom11314.0	0	-	56083439	56085210	0	1	1771,	0,
9	56531895	56532387	ppyiretrom23119.0	0	-	56531895	56532387	0	1	492,	0,
9	56800049	56804597	ppy_retrop11490.1	0	+	56800049	56804597	0	1	4548,	0,
9	58352845	58353735	ppyiretrom23174.0	0	-	58352845	58353735	0	1	890,	0,
9	63464032	63468332	ppyiretrop23634.0	0	+	63464032	63468332	0	2	647,3652,	0,648,
9	71347225	71349081	ppy_retrop11534.1	0	+	71347225	71349081	0	1	1856,	0,
9	71348150	71349080	ppy_retrop11534.0	0	+	71348150	71349080	0	1	930,	0,
9	71348273	71349080	ppy_retrop11534.2	0	+	71348273	71349080	0	1	807,	0,
9	83205704	83206754	ppyiretrom23389.0	0	-	83205704	83206754	0	1	1050,	0,
9	83822673	83823011	ppyiretrom23420.0	0	-	83822673	83823011	0	1	338,	0,
9	97504854	97505178	ppyiretrom23577.0	0	-	97504854	97505178	0	4	8,28,186,99,	0,9,38,225,
Un	3543802	3545684	ppy_retrom05300.0	0	-	3543802	3545684	0	1	1882,	0,
Un	4026798	4029330	ppyiretrop09171.0	0	+	4026798	4029330	0	1	2532,	0,
Un	6155667	6155981	ppy_retrom05356.0	0	-	6155667	6155981	0	1	314,	0,
Un	8331056	8332535	ppy_retrop05403.0	0	+	8331056	8332535	0	1	1479,	0,
Un	8555180	8556689	ppy_retrom05553.0	0	-	8555180	8556689	0	1	1509,	0,
Un	8577006	8583729	ppy_retrom05565.1	0	-	8577006	8583729	0	2	3251,1827,	0,4896,
Un	9683553	9684763	ppyiretrom09082.0	0	-	9683553	9684763	0	1	1210,	0,
Un	10326349	10329211	ppy_retrop05470.1	0	+	10326349	10329211	0	1	2862,	0,
Un	10958505	10964148	ppyiretrop09385.0	0	+	10958505	10964148	0	1	5643,	0,
Un	11701834	11702644	ppyiretrom09123.0	0	-	11701834	11702644	0	1	810,	0,
Un	12381290	12383038	ppy_retrop05545.0	0	+	12381290	12383038	0	1	1748,	0,
Un	13171303	13173829	ppyiretrom09167.0	0	-	13171303	13173829	0	1	2526,	0,
Un	13319504	13319819	ppy_retrom05643.0	0	-	13319504	13319819	0	1	315,	0,
Un	14903812	14908353	ppyiretrop09598.0	0	+	14903812	14908353	0	1	4541,	0,
Un	16689676	16690512	ppy_retrom05684.0	0	-	16689676	16690512	0	1	836,	0,
Un	53841848	53843746	ppy_retrop05889.0	0	+	53841848	53843746	0	1	1898,	0,
X	2149170	2149504	ppy_retrop13259.0	0	+	2149170	2149504	0	1	334,	0,
X	13229918	13231166	ppy_retrom12756.0	0	-	13229918	13231166	0	2	734,333,	0,915,
X	21907998	21909368	ppy_retrop13310.0	0	+	21907998	21909368	0	1	1370,	0,
X	23075919	23077987	ppy_retrop13315.0	0	+	23075919	23077987	0	1	2068,	0,
X	31363892	31364632	ppy_retrom12816.0	0	-	31363892	31364632	0	1	740,	0,
X	37998745	37999949	ppy_retrop13427.0	0	+	37998745	37999949	0	1	1204,	0,
X	48585569	48588842	ppy_retrop13477.0	0	+	48585569	48588842	0	1	3273,	0,
X	50025516	50025605	ppyiretrom27881.0	0	-	50025516	50025605	0	1	89,	0,
X	51900475	51905117	ppyiretrop28645.0	0	+	51900475	51905117	0	2	621,1190,	0,3452,
X	52085664	52091834	ppyiretrom27925.0	0	-	52085664	52091834	0	2	1374,617,	0,5553,
X	52191472	52193225	ppy_retrom12945.0	0	-	52191472	52193225	0	1	1753,	0,
X	52320548	52322965	ppy_retrop13587.0	0	+	52320548	52322965	0	1	2417,	0,
X	56170267	56183703	ppy_retrop13613.0	0	+	56170267	56183703	0	3	59,60,3035,	0,1220,10401,
X	57223056	57227132	ppy_retrop13617.0	0	+	57223056	57227132	0	2	132,3185,	0,891,
X	57223056	57227132	ppy_retrop13617.1	0	+	57223056	57227132	0	1	4076,	0,
X	57619021	57620325	ppyiretrom28027.0	0	-	57619021	57620325	0	1	1304,	0,
X	57711886	57713733	ppyiretrom28041.0	0	-	57711886	57713733	0	1	1847,	0,
X	58161408	58166526	ppyiretrop28749.0	0	+	58161408	58166526	0	1	5118,	0,
X	60674019	60675942	ppyiretrom28090.0	0	-	60674019	60675942	0	1	1923,	0,
X	67720723	67723413	ppy_retrop13659.0	0	+	67720723	67723413	0	1	2690,	0,
X	71787396	71788060	ppy_retrop13699.0	0	+	71787396	71788060	0	1	664,	0,
X	100415003	100420689	ppy_retrop13793.0	0	+	100415003	100420689	0	2	70,1999,	0,3687,
X	100415003	100420689	ppy_retrop13793.1	0	+	100415003	100420689	0	2	82,1999,	0,3687,
X	102443683	102449708	ppy_retrom13199.0	0	-	102443683	102449708	0	1	6025,	0,
X	102626632	102637590	ppyiretrom28681.0	0	-	102626632	102637590	0	4	844,102,90,51,	0,2301,9441,10907,
X	102626632	102637590	ppyiretrom28681.1	0	-	102626632	102637590	0	3	844,90,51,	0,9441,10907,
X	102626632	102637590	ppyiretrom28681.2	0	-	102626632	102637590	0	4	844,153,90,51,	0,2301,9441,10907,
X	102626720	102636160	ppyiretrom28681.3	0	-	102626720	102636160	0	3	756,153,87,	0,2213,9353,
X	102776031	102780696	ppy_retrom13206.0	0	-	102776031	102780696	0	2	3497,52,	0,4613,
X	106085103	106085351	ppyiretrop29446.0	0	+	106085103	106085351	0	1	248,	0,
X	106222808	106225177	ppy_retrop13834.0	0	+	106222808	106225177	0	1	2369,	0,
X	110802835	110803022	ppy_retrom13244.0	0	-	110802835	110803022	0	1	187,	0,
X	114700075	114700420	ppyiretrom28823.0	0	-	114700075	114700420	0	1	345,	0,
X	119986158	119989615	ppy_retrop13897.0	0	+	119986158	119989615	0	1	3457,	0,
X	125404316	125407367	ppy_retrom13301.0	0	-	125404316	125407367	0	1	3051,	0,
X	125404316	125407367	ppy_retrom13301.1	0	-	125404316	125407367	0	2	1206,1765,	0,1286,
X	125779270	125781046	ppy_retrom13303.0	0	-	125779270	125781046	0	2	104,1585,	0,191,
X	134808641	134809322	ppy_retrop13974.0	0	+	134808641	134809322	0	1	681,	0,
X	136316117	136320708	ppy_retrom13363.0	0	-	136316117	136320708	0	1	4591,	0,
X	136357842	136359147	ppy_retrop14005.0	0	+	136357842	136359147	0	1	1305,	0,
X	137259958	137260121	ppyiretrop29894.0	0	+	137259958	137260121	0	1	163,	0,
X	139743947	139745794	ppy_retrop14017.0	0	+	139743947	139745794	0	1	1847,	0,

## Sheet: Macaque
# Supplemental Table S11: Retrocopy transcripts in macaque (BED12 format)
Chromosome	Start	End	Transcript_ID	Score (not defined)	Strand	Thick Start (not defined)	Thick End (not defined)	Item_RGB (not defined)	Exon_count	Exon_sizes	Exon_starts
1	3562616	3565031	mmu_retrop37749.0	0	+	3562616	3565031	0	1	2415,	0,
1	18594595	18595654	mmu_retrop37874.0	0	+	18594595	18595654	0	1	1059,	0,
1	29504530	29505439	mmu_retrop38007.0	0	+	29504530	29505439	0	1	909,	0,
1	42643484	42651115	mmu_retrom36449.0	0	-	42643484	42651115	0	3	407,1985,3526,	0,1714,4105,
1	61430352	61432046	mmu_retrom36753.0	0	-	61430352	61432046	0	1	1694,	0,
1	67756584	67757675	mmu_retrom36768.0	0	-	67756584	67757675	0	1	1091,	0,
1	89331224	89332640	mmu_retrop38732.0	0	+	89331224	89332640	0	1	1416,	0,
1	89413526	89414961	mmu_retrom36926.0	0	-	89413526	89414961	0	1	1435,	0,
1	91716809	91729246	mmuiretrom35560.0	0	-	91716809	91729246	0	3	2219,100,1558,	0,7609,10879,
1	91756203	91757139	mmu_retrop38743.0	0	+	91756203	91757139	0	1	936,	0,
1	94211373	94211812	mmu_retrom36964.0	0	-	94211373	94211812	0	1	439,	0,
1	94531802	94534645	mmu_retrom36985.0	0	-	94531802	94534645	0	1	2843,	0,
1	95977198	95979572	mmu_retrom37043.0	0	-	95977198	95979572	0	1	2374,	0,
1	96826005	96826395	mmu_retrop38801.0	0	+	96826005	96826395	0	1	390,	0,
1	106545476	106546313	mmu_retrop38918.0	0	+	106545476	106546313	0	1	837,	0,
1	111958311	111959288	mmu_retrop38940.0	0	+	111958311	111959288	0	1	977,	0,
1	119281889	119288039	mmu_retrom37377.0	0	-	119281889	119288039	0	2	856,140,	0,6010,
1	123969837	123971106	mmu_retrom37504.0	0	-	123969837	123971106	0	1	1269,	0,
1	130498152	130498828	mmu_retrop39164.0	0	+	130498152	130498828	0	1	676,	0,
1	134775160	134775661	mmu_retrom37681.0	0	-	134775160	134775661	0	1	501,	0,
1	136750247	136752351	mmu_retrom37695.0	0	-	136750247	136752351	0	1	2104,	0,
1	139375180	139375519	mmuiretrop39733.0	0	+	139375180	139375519	0	1	339,	0,
1	140095156	140097525	mmu_retrop39359.0	0	+	140095156	140097525	0	1	2369,	0,
1	142131195	142131547	mmu_retrop39457.0	0	+	142131195	142131547	0	1	352,	0,
1	142267534	142268729	mmuiretrop38783.0	0	+	142267534	142268729	0	1	1195,	0,
1	147746102	147746356	mmu_retrom37943.0	0	-	147746102	147746356	0	1	254,	0,
1	150101215	150101409	mmu_retrop39524.0	0	+	150101215	150101409	0	1	194,	0,
1	155758777	155758980	mmu_retrop39543.0	0	+	155758777	155758980	0	1	203,	0,
1	161171361	161173575	mmu_retrom38046.0	0	-	161171361	161173575	0	1	2214,	0,
1	162649526	162653111	mmu_retrom38064.0	0	-	162649526	162653111	0	1	3585,	0,
1	164104060	164104503	mmuiretrop40769.0	0	+	164104060	164104503	0	1	443,	0,
1	165325087	165327416	mmu_retrom38106.0	0	-	165325087	165327416	0	1	2329,	0,
1	171820577	171821549	mmu_retrop39680.0	0	+	171820577	171821549	0	1	972,	0,
1	191143677	191147496	mmu_retrom38355.0	0	-	191143677	191147496	0	1	3819,	0,
1	215410886	215418738	mmu_retrop40387.0	0	+	215410886	215418738	0	2	432,3573,	0,4279,
1	218308483	218309176	mmu_retrop40409.0	0	+	218308483	218309176	0	1	693,	0,
1	220546812	220563479	mmu_retrom38924.0	0	-	220546812	220563479	0	2	2428,46,	0,16621,
1	220546812	220621198	mmu_retrom38924.2	0	-	220546812	220621198	0	5	2428,46,59,40,59,	0,16621,54998,68482,74327,
1	220546812	220621210	mmu_retrom38924.1	0	-	220546812	220621210	0	5	2428,46,59,40,71,	0,16621,54998,68482,74327,
1	228166729	228177603	mmu_retrom38977.0	0	-	228166729	228177603	0	3	3377,59,313,	0,9070,10561,
10	481227	484771	mmu_retrom08459.0	0	-	481227	484771	0	1	3544,	0,
10	10601507	10602537	mmu_retrop09860.0	0	+	10601507	10602537	0	1	1030,	0,
10	17941877	17944660	mmu_retrop09919.0	0	+	17941877	17944660	0	1	2783,	0,
10	20802906	20804508	mmu_retrom08601.1	0	-	20802906	20804508	0	1	1602,	0,
10	28760064	28781044	mmu_retrop10054.0	0	+	28760064	28781044	0	2	142,279,	0,20701,
10	29057208	29058445	mmu_retrop10060.0	0	+	29057208	29058445	0	1	1237,	0,
10	32242445	32267740	mmuiretrom08811.0	0	-	32242445	32267740	0	8	3732,179,106,114,119,123,102,1465,	0,4617,6975,7747,18525,18749,19081,23830,
10	36818761	36819764	mmu_retrom08846.0	0	-	36818761	36819764	0	1	1003,	0,
10	38822266	38827001	mmu_retrop10220.0	0	+	38822266	38827001	0	2	51,505,	0,4230,
10	56652252	56656200	mmu_retrop10339.0	0	+	56652252	56656200	0	2	273,756,	0,3192,
10	56652629	56656200	mmu_retrop10339.1	0	+	56652629	56656200	0	2	263,756,	0,2815,
10	58866487	58867452	mmu_retrom09113.0	0	-	58866487	58867452	0	1	965,	0,
10	64759364	64759997	mmuiretrop09944.0	0	+	64759364	64759997	0	1	633,	0,
10	67219555	67273348	mmuiretrop10780.0	0	+	67219555	67273348	0	3	41,1172,1903,	0,23828,51890,
10	67660407	67671131	mmuiretrop10546.0	0	+	67660407	67671131	0	3	2599,97,94,	0,8760,10630,
10	74514101	74518180	mmu_retrom09523.0	0	-	74514101	74518180	0	1	4079,	0,
10	75836674	75850296	mmu_retrop11779.0	0	+	75836674	75850296	0	2	244,1454,	0,12168,
10	84765777	84767395	mmu_retrom09603.0	0	-	84765777	84767395	0	1	1618,	0,
10	85041583	85041920	mmu_retrom09623.0	0	-	85041583	85041920	0	1	337,	0,
11	949678	950342	mmu_retrop17535.0	0	+	949678	950342	0	1	664,	0,
11	3586371	3598891	mmu_retrop17547.0	0	+	3586371	3598891	0	1	12520,	0,
11	3603625	3606741	mmuiretrom17777.0	0	-	3603625	3606741	0	1	3116,	0,
11	6216824	6217069	mmu_retrop17583.0	0	+	6216824	6217069	0	1	245,	0,
11	9434350	9434940	mmu_retrop17679.0	0	+	9434350	9434940	0	1	590,	0,
11	10808961	10811450	mmu_retrop17685.0	0	+	10808961	10811450	0	1	2489,	0,
11	41262679	41263146	mmu_retrom16059.0	0	-	41262679	41263146	0	1	467,	0,
11	41262680	41263059	mmu_retrom16059.1	0	-	41262680	41263059	0	1	379,	0,
11	44243702	44264882	mmu_retrop17936.0	0	+	44243702	44264882	0	2	460,1646,	0,19534,
11	44243702	44264882	mmu_retrop17936.1	0	+	44243702	44264882	0	2	460,1646,	0,19534,
11	44243959	44264882	mmu_retrop17936.2	0	+	44243959	44264882	0	2	203,1646,	0,19277,
11	44250969	44264882	mmu_retrop17936.3	0	+	44250969	44264882	0	2	165,1646,	0,12267,
11	44262815	44264882	mmu_retrop17936.4	0	+	44262815	44264882	0	1	2067,	0,
11	45433837	45444073	mmu_retrop17950.0	0	+	45433837	45444073	0	2	87,451,	0,9785,
11	52269496	52270010	mmu_retrop18073.0	0	+	52269496	52270010	0	1	514,	0,
11	55205141	55206763	mmuiretrom17908.0	0	-	55205141	55206763	0	1	1622,	0,
11	56291614	56292839	mmu_retrom16364.0	0	-	56291614	56292839	0	1	1225,	0,
11	59496980	59497235	mmu_retrop18339.0	0	+	59496980	59497235	0	1	255,	0,
11	60203827	60207846	mmu_retrop18372.0	0	+	60203827	60207846	0	1	4019,	0,
11	60832284	60834430	mmu_retrop18400.0	0	+	60832284	60834430	0	1	2146,	0,
11	61293834	61294113	mmu_retrop18405.0	0	+	61293834	61294113	0	1	279,	0,
11	61403337	61410078	mmu_retrop18406.0	0	+	61403337	61410078	0	3	196,102,495,	0,1020,6246,
11	61403337	61410078	mmu_retrop18406.1	0	+	61403337	61410078	0	3	196,102,506,	0,1020,6235,
11	64603874	64653839	mmu_retrop18428.0	0	+	64603874	64653839	0	2	952,6475,	0,43490,
11	64638929	64653839	mmu_retrop18428.1	0	+	64638929	64653839	0	2	423,6475,	0,8435,
11	64638929	64653839	mmu_retrop18428.2	0	+	64638929	64653839	0	3	423,149,6475,	0,1039,8435,
11	65373611	65374691	mmu_retrom16487.0	0	-	65373611	65374691	0	1	1080,	0,
11	65798076	65831075	mmu_retrop18470.0	0	+	65798076	65831075	0	11	306,85,75,134,50,68,97,161,156,78,3154,	0,1013,5306,7652,11003,14843,15037,19532,26402,27244,29845,
11	65798076	65831075	mmu_retrop18470.1	0	+	65798076	65831075	0	11	295,85,75,134,50,68,97,161,156,78,3154,	0,1013,5306,7652,11003,14843,15037,19532,26402,27244,29845,
11	71557966	71561579	mmu_retrop18481.0	0	+	71557966	71561579	0	1	3613,	0,
11	72933326	72933848	mmuiretrom16585.0	0	-	72933326	72933848	0	1	522,	0,
11	75469469	75469698	mmu_retrom16572.0	0	-	75469469	75469698	0	1	229,	0,
11	77541208	77541574	mmu_retrop18529.0	0	+	77541208	77541574	0	1	366,	0,
11	77970985	77972201	mmu_retrom16594.0	0	-	77970985	77972201	0	1	1216,	0,
11	81599800	81600018	mmu_retrom16633.0	0	-	81599800	81600018	0	1	218,	0,
11	86165087	86165699	mmu_retrom16650.0	0	-	86165087	86165699	0	1	612,	0,
11	86379723	86381397	mmu_retrop18596.0	0	+	86379723	86381397	0	1	1674,	0,
11	96310605	96324807	mmu_retrop18731.0	0	+	96310605	96324807	0	2	255,710,	0,13492,
11	98921180	98936084	mmu_retrom16748.0	0	-	98921180	98936084	0	3	533,71,224,	0,4153,14680,
11	99622340	99638809	mmu_retrom16753.0	0	-	99622340	99638809	0	3	102,137,3099,	0,2895,13370,
11	102085529	102086106	mmu_retrom16837.0	0	-	102085529	102086106	0	1	577,	0,
11	103086446	103086975	mmuiretrom17987.0	0	-	103086446	103086975	0	1	529,	0,
11	110292201	110293679	mmu_retrom16962.1	0	-	110292201	110293679	0	1	1478,	0,
11	110292551	110293679	mmu_retrom16962.0	0	-	110292551	110293679	0	1	1128,	0,
11	111164569	111166484	mmu_retrop18797.0	0	+	111164569	111166484	0	1	1915,	0,
11	112582381	112582634	mmu_retrop18811.0	0	+	112582381	112582634	0	1	253,	0,
11	116081963	116082706	mmu_retrom17004.0	0	-	116081963	116082706	0	1	743,	0,
11	123017497	123017908	mmu_retrom17069.0	0	-	123017497	123017908	0	1	411,	0,
12	10146747	10148806	mmuiretrop12011.0	0	+	10146747	10148806	0	1	2059,	0,
12	12278637	12278908	mmu_retrom09741.0	0	-	12278637	12278908	0	1	271,	0,
12	12433333	12433725	mmu_retrom09743.0	0	-	12433333	12433725	0	1	392,	0,
12	23615901	23616423	mmu_retrop12106.1	0	-	23615901	23616423	0	1	522,	0,
12	23615901	23616423	mmu_retrop12106.1	0	-	23615901	23616423	0	1	522,	0,
12	23615970	23616147	mmu_retrop12106.0	0	+	23615970	23616147	0	1	177,	0,
12	29970475	29970943	mmu_retrop12128.0	0	+	29970475	29970943	0	1	468,	0,
12	44233106	44233553	mmuiretrom10228.0	0	-	44233106	44233553	0	1	447,	0,
12	45858603	45860018	mmu_retrop12398.0	0	+	45858603	45860018	0	1	1415,	0,
12	46402441	46404605	mmu_retrop12411.0	0	+	46402441	46404605	0	1	2164,	0,
12	54485034	54485463	mmu_retrom10217.0	0	-	54485034	54485463	0	1	429,	0,
12	64885600	64887867	mmu_retrom10286.0	0	-	64885600	64887867	0	1	2267,	0,
12	69996910	70011527	mmu_retrom10392.0	0	-	69996910	70011527	0	6	5721,73,135,176,155,163,	0,8205,8376,9446,11738,14454,
12	80279013	80279632	mmu_retrom10527.0	0	-	80279013	80279632	0	1	619,	0,
12	85834695	85837538	mmu_retrop12679.1	0	+	85834695	85837538	0	1	2843,	0,
12	97614729	97615114	mmu_retrom10637.0	0	-	97614729	97615114	0	1	385,	0,
12	97747428	97751094	mmu_retrom10646.0	0	-	97747428	97751094	0	2	2679,38,	0,3628,
12	97748485	97751094	mmu_retrom10646.1	0	-	97748485	97751094	0	2	1622,38,	0,2571,
13	18481527	18515276	mmu_retrom17233.0	0	-	18481527	18515276	0	8	1036,185,123,130,168,465,138,103,	0,22056,22645,29457,30697,31144,32911,33646,
13	19489910	19490379	mmu_retrom17235.0	0	-	19489910	19490379	0	1	469,	0,
13	20373488	20375740	mmu_retrop19119.0	0	+	20373488	20375740	0	1	2252,	0,
13	24861639	24862696	mmuiretrop20542.0	0	+	24861639	24862696	0	1	1057,	0,
13	46629280	46642893	mmu_retrom17528.0	0	-	46629280	46642893	0	2	961,94,	0,13519,
13	46629280	46643219	mmu_retrom17528.1	0	-	46629280	46643219	0	2	961,35,	0,13904,
13	47273227	47288535	mmu_retrom17545.0	0	-	47273227	47288535	0	6	631,136,107,144,31,188,	0,1536,2400,2591,9406,15120,
13	57973362	57974050	mmu_retrop19530.0	0	+	57973362	57974050	0	1	688,	0,
13	61308363	61308660	mmu_retrop19567.0	0	+	61308363	61308660	0	1	297,	0,
13	73681477	73682539	mmu_retrop19794.0	0	+	73681477	73682539	0	1	1062,	0,
13	76401258	76402606	mmu_retrom17808.0	0	-	76401258	76402606	0	1	1348,	0,
13	80919477	80919751	mmuiretrom19846.0	0	-	80919477	80919751	0	1	274,	0,
13	84800442	84801485	mmuiretrop21543.0	0	+	84800442	84801485	0	1	1043,	0,
13	96099880	96113684	mmuiretrom18523.0	0	-	96099880	96113684	0	3	462,120,93,	0,6710,13711,
13	96099880	96113684	mmuiretrom18523.1	0	-	96099880	96113684	0	4	462,126,120,93,	0,2310,6710,13711,
13	96099880	96113684	mmuiretrom18523.2	0	-	96099880	96113684	0	4	462,126,274,93,	0,2310,6556,13711,
13	98280884	98291040	mmuiretrop20924.0	0	+	98280884	98291040	0	4	1146,117,107,2893,	0,1993,3179,7263,
13	98280884	98291040	mmuiretrop20924.1	0	+	98280884	98291040	0	3	2110,107,2893,	0,3179,7263,
13	99215623	99216235	mmuiretrop20699.0	0	+	99215623	99216235	0	1	612,	0,
13	99229630	99230801	mmuiretrom19049.0	0	-	99229630	99230801	0	1	1171,	0,
13	99477737	99478015	mmu_retrop20187.0	0	+	99477737	99478015	0	1	278,	0,
13	101216073	101218564	mmuiretrom18749.0	0	-	101216073	101218564	0	1	2491,	0,
13	102182292	102183697	mmuiretrom19057.0	0	-	102182292	102183697	0	1	1405,	0,
13	108463031	108463268	mmu_retrom20280.0	0	-	108463031	108463268	0	1	237,	0,
13	108513922	108572926	mmuiretrop20722.0	0	+	108513922	108572926	0	22	523,68,112,153,231,146,193,88,210,182,176,124,162,138,147,180,84,136,95,5152,171,9,	0,13291,15258,15794,20346,20919,25472,32375,34893,37235,37502,37845,38973,39401,39806,40881,41147,45006,48672,49703,58207,58995,
13	109936582	109937899	mmu_retrom20298.0	0	-	109936582	109937899	0	1	1317,	0,
13	126439861	126444532	mmu_retrom20589.0	0	-	126439861	126444532	0	1	4671,	0,
13	136500368	136501275	mmuiretrom18552.0	0	-	136500368	136501275	0	1	907,	0,
13	136500368	136503715	mmuiretrom18552.1	0	-	136500368	136503715	0	2	898,359,	0,2988,
14	41634897	41635782	mmu_retrom13168.0	0	-	41634897	41635782	0	1	885,	0,
14	44728806	44730685	mmu_retrop14853.0	0	+	44728806	44730685	0	1	1879,	0,
14	44962985	44965354	mmu_retrop14872.0	0	+	44962985	44965354	0	1	2369,	0,
14	64591080	64592462	mmu_retrop15068.0	0	+	64591080	64592462	0	1	1382,	0,
14	65189866	65190477	mmu_retrom13350.1	0	-	65189866	65190477	0	1	611,	0,
14	65189866	65190484	mmu_retrom13350.0	0	-	65189866	65190484	0	1	618,	0,
14	69704841	69719507	mmu_retrop15725.0	0	+	69704841	69719507	0	2	52,1925,	0,12741,
14	72656865	72660222	mmu_retrom13805.0	0	-	72656865	72660222	0	1	3357,	0,
14	78219908	78221921	mmuiretrop15486.0	0	+	78219908	78221921	0	1	2013,	0,
14	79145425	79146241	mmuiretrom12626.0	0	-	79145425	79146241	0	1	816,	0,
14	84262537	84263924	mmu_retrop15899.0	0	+	84262537	84263924	0	1	1387,	0,
14	85614463	85615221	mmu_retrom13898.0	0	-	85614463	85615221	0	1	758,	0,
14	102641285	102643371	mmu_retrop16057.0	0	+	102641285	102643371	0	1	2086,	0,
14	110357395	110358019	mmu_retrom14093.0	0	-	110357395	110358019	0	1	624,	0,
14	110644242	110685317	mmu_retrop16101.0	0	+	110644242	110685317	0	11	190,224,116,103,129,161,168,138,183,111,1085,	0,14320,14725,15496,22493,23392,24805,35945,37008,38455,39990,
14	116928809	116929613	mmu_retrom14125.0	0	-	116928809	116929613	0	1	804,	0,
14	117222519	117222744	mmu_retrop16132.0	0	+	117222519	117222744	0	1	225,	0,
14	120067535	120067961	mmuiretrom13484.0	0	-	120067535	120067961	0	1	426,	0,
14	121318581	121319908	mmu_retrop16144.0	0	+	121318581	121319908	0	1	1327,	0,
14	123258342	123262340	mmu_retrop16318.0	0	+	123258342	123262340	0	1	3998,	0,
14	128099434	128101204	mmuiretrom13524.2	0	-	128099434	128101204	0	1	1770,	0,
14	132128942	132131605	mmu_retrom14385.0	0	-	132128942	132131605	0	1	2663,	0,
15	34612831	34616108	mmuiretrop12468.0	0	+	34612831	34616108	0	1	3277,	0,
15	39014861	39021837	mmu_retrom11374.0	0	-	39014861	39021837	0	2	2453,113,	0,6863,
15	39535359	39535933	mmu_retrom11375.0	0	-	39535359	39535933	0	1	574,	0,
15	44589491	44593195	mmuiretrop13680.0	0	+	44589491	44593195	0	1	3704,	0,
15	45906687	45907757	mmu_retrom11448.0	0	-	45906687	45907757	0	1	1070,	0,
15	55702403	55706687	mmu_retrop13476.0	0	+	55702403	55706687	0	1	4284,	0,
15	55702674	55704867	mmu_retrop13476.1	0	+	55702674	55704867	0	2	5,1751,	0,442,
15	56308961	56309313	mmuiretrop12908.0	0	+	56308961	56309313	0	1	352,	0,
15	57934371	57936108	mmu_retrom11625.0	0	-	57934371	57936108	0	1	1737,	0,
15	71137119	71141601	mmu_retrop13686.0	0	+	71137119	71141601	0	1	4482,	0,
15	71137119	71141601	mmu_retrop13686.1	0	+	71137119	71141601	0	2	134,3233,	0,1249,
15	71828140	71829102	mmuiretrop13321.0	0	+	71828140	71829102	0	1	962,	0,
15	77575260	77576503	mmu_retrop13721.0	0	+	77575260	77576503	0	1	1243,	0,
15	77812340	77813886	mmu_retrom11809.0	0	-	77812340	77813886	0	1	1546,	0,
15	81068898	81069695	mmu_retrom11850.0	0	-	81068898	81069695	0	1	797,	0,
15	85839148	85839516	mmu_retrom11907.0	0	-	85839148	85839516	0	1	368,	0,
15	101485748	101487870	mmu_retrom12042.0	0	-	101485748	101487870	0	1	2122,	0,
15	103103246	103103660	mmu_retrop13872.0	0	+	103103246	103103660	0	1	414,	0,
16	4902847	4905888	mmu_retrom06090.0	0	-	4902847	4905888	0	1	3041,	0,
16	15722573	15830610	mmuiretrop07106.1	0	+	15722573	15830610	0	2	96,1510,	0,106527,
16	18931307	18934878	mmuiretrop07301.1	0	+	18931307	18934878	0	5	91,1079,686,134,917,	0,197,1362,2389,2654,
16	19043604	19046199	mmu_retrop07672.1	0	+	19043604	19046199	0	1	2595,	0,
16	22528378	22531199	mmu_retrom06202.0	0	-	22528378	22531199	0	1	2821,	0,
16	23445424	23472755	mmu_retrom06239.0	0	-	23445424	23472755	0	2	1388,64,	0,27267,
16	27804256	27804967	mmu_retrom06297.0	0	-	27804256	27804967	0	1	711,	0,
16	29028808	29029264	mmu_retrop07749.0	0	+	29028808	29029264	0	1	456,	0,
16	31185219	31186484	mmu_retrom06308.0	0	-	31185219	31186484	0	1	1265,	0,
16	31364438	31365187	mmu_retrop07777.0	0	+	31364438	31365187	0	1	749,	0,
16	31425850	31426393	mmuiretrop06524.0	0	+	31425850	31426393	0	1	543,	0,
16	34088914	34089893	mmu_retrom06361.0	0	-	34088914	34089893	0	1	979,	0,
16	37562481	37562771	mmu_retrom06380.0	0	-	37562481	37562771	0	1	290,	0,
16	38119690	38121954	mmuiretrop06956.0	0	+	38119690	38121954	0	1	2264,	0,
16	43144274	43145323	mmu_retrop07917.0	0	+	43144274	43145323	0	1	1049,	0,
16	44904241	44905071	mmu_retrop07924.0	0	+	44904241	44905071	0	1	830,	0,
16	52875266	52876893	mmuiretrom05935.0	0	-	52875266	52876893	0	1	1627,	0,
16	59123778	59126914	mmu_retrom06645.0	0	-	59123778	59126914	0	1	3136,	0,
16	60468739	60471538	mmu_retrop08211.0	0	+	60468739	60471538	0	1	2799,	0,
16	64857046	64885654	mmu_retrom06701.0	0	-	64857046	64885654	0	3	95,300,127,	0,28000,28481,
16	64884520	64885654	mmu_retrom06701.1	0	-	64884520	64885654	0	2	826,127,	0,1007,
16	76666031	76667388	mmuiretrop06664.0	0	+	76666031	76667388	0	1	1357,	0,
17	476937	477496	mmuiretrom07707.0	0	-	476937	477496	0	1	559,	0,
17	1851355	1852816	mmu_retrop09213.1	0	+	1851355	1852816	0	1	1461,	0,
17	4625519	4627499	mmu_retrop09229.0	0	+	4625519	4627499	0	1	1980,	0,
17	5011917	5013957	mmu_retrop09242.0	0	+	5011917	5013957	0	1	2040,	0,
17	9873073	9874952	mmu_retrop09346.0	0	+	9873073	9874952	0	1	1879,	0,
17	16306666	16309138	mmu_retrom07763.0	0	-	16306666	16309138	0	1	2472,	0,
17	16319743	16320359	mmu_retrom07769.0	0	-	16319743	16320359	0	1	616,	0,
17	28702146	28704593	mmu_retrop09456.0	0	+	28702146	28704593	0	1	2447,	0,
17	30835409	30856688	mmu_retrop09478.0	0	+	30835409	30856688	0	4	1145,231,932,3904,	0,7583,13081,17375,
17	30836604	30856643	mmu_retrop09478.1	0	+	30836604	30856643	0	3	61,231,3859,	0,6388,16180,
17	31330311	31331246	mmuiretrom08138.0	0	-	31330311	31331246	0	1	935,	0,
17	43452196	43453116	mmu_retrom08047.0	0	-	43452196	43453116	0	1	920,	0,
17	49260114	49261036	mmu_retrop09577.0	0	+	49260114	49261036	0	1	922,	0,
17	60888696	60888839	mmu_retrom08135.0	0	-	60888696	60888839	0	1	143,	0,
17	64295551	64295812	mmuiretrop08757.0	0	+	64295551	64295812	0	1	261,	0,
17	71260911	71261624	mmuiretrom07822.0	0	-	71260911	71261624	0	1	713,	0,
18	3748105	3749444	mmu_retrop06579.0	0	+	3748105	3749444	0	1	1339,	0,
18	3839417	3839942	mmu_retrop06582.0	0	+	3839417	3839942	0	1	525,	0,
18	4564091	4564923	mmu_retrom05409.1	0	-	4564091	4564923	0	2	784,44,	0,788,
18	13520128	13521256	mmu_retrom05467.0	0	-	13520128	13521256	0	1	1128,	0,
18	15436219	15438433	mmu_retrom05523.0	0	-	15436219	15438433	0	1	2214,	0,
18	36486504	36488831	mmuiretrop05645.0	0	+	36486504	36488831	0	1	2327,	0,
18	50406710	50408230	mmu_retrop06908.0	0	+	50406710	50408230	0	1	1520,	0,
18	52833675	52834798	mmu_retrop06943.0	0	+	52833675	52834798	0	1	1123,	0,
18	62856020	62856778	mmuiretrop05515.0	0	+	62856020	62856778	0	1	758,	0,
18	63351764	63352245	mmu_retrom05849.0	0	-	63351764	63352245	0	1	481,	0,
18	63998038	63999946	mmuiretrop05690.0	0	+	63998038	63999946	0	1	1908,	0,
18	63998038	64002281	mmuiretrop05690.1	0	+	63998038	64002281	0	2	1307,330,	0,3913,
19	8723248	8735430	mmu_retrom03097.0	0	-	8723248	8735430	0	6	1553,83,96,127,89,133,	0,2051,2620,10668,11425,12049,
19	8723248	8742777	mmu_retrom03097.1	0	-	8723248	8742777	0	9	1553,83,96,127,89,110,337,84,734,	0,2051,2620,10668,11425,12049,13400,18548,18795,
19	9620061	9620664	mmuiretrom02931.0	0	-	9620061	9620664	0	1	603,	0,
19	11348872	11349753	mmu_retrop04146.0	0	+	11348872	11349753	0	1	881,	0,
19	11970095	11970318	mmuiretrom02952.0	0	-	11970095	11970318	0	1	223,	0,
19	12244738	12275021	mmu_retrom03346.0	0	-	12244738	12275021	0	5	1564,61,127,45,201,	0,2699,3271,28553,30082,
19	22527031	22527564	mmuiretrop03892.0	0	+	22527031	22527564	0	1	533,	0,
19	35265283	35268758	mmuiretrom02696.0	0	-	35265283	35268758	0	2	369,2783,	0,692,
19	39883878	39884720	mmu_retrom03545.0	0	-	39883878	39884720	0	1	842,	0,
19	43597606	43603799	mmu_retrom03815.0	0	-	43597606	43603799	0	3	2696,93,163,	0,5660,6030,
19	44024567	44048329	mmu_retrom04059.0	0	-	44024567	44048329	0	5	3504,96,127,82,1205,	0,12778,14756,16710,22557,
19	44024567	44048329	mmu_retrom04059.0	0	-	44024567	44048329	0	5	3504,96,127,82,1205,	0,12778,14756,16710,22557,
19	56186712	56210038	mmu_retrom04453.0	0	-	56186712	56210038	0	2	2283,1475,	0,21851,
19	57712781	57713290	mmu_retrop05652.0	0	+	57712781	57713290	0	1	509,	0,
19	57893711	57894693	mmu_retrop05656.0	0	+	57893711	57894693	0	1	982,	0,
19	58494397	58495691	mmuiretrop05436.0	0	+	58494397	58495691	0	1	1294,	0,
19	58724855	58749898	mmu_retrom04843.0	0	-	58724855	58749898	0	4	2816,127,82,30,	0,10369,15199,25013,
19	59361911	59362432	mmu_retrop05759.0	0	+	59361911	59362432	0	1	521,	0,
19	62502666	62519446	mmu_retrop05999.0	0	+	62502666	62519446	0	8	368,92,127,96,164,115,96,2816,	0,764,7732,8033,9498,10306,10749,13964,
19	62834726	62859593	mmu_retrom04971.1	0	-	62834726	62859593	0	2	489,195,	0,24672,
19	62834727	62835299	mmu_retrom04971.0	0	-	62834727	62835299	0	1	572,	0,
19	63077281	63091298	mmuiretrop05287.0	0	+	63077281	63091298	0	3	262,96,2062,	0,7213,11955,
19	63204308	63204604	mmu_retrop06436.0	0	+	63204308	63204604	0	1	296,	0,
19	63807069	63809472	mmuiretrop03712.0	0	+	63807069	63809472	0	1	2403,	0,
19	63888896	63893499	mmu_retrom05283.0	0	-	63888896	63893499	0	1	4603,	0,
2	975175	976977	mmu_retrop33791.0	0	+	975175	976977	0	1	1802,	0,
2	14517577	14521682	mmu_retrom32668.0	0	-	14517577	14521682	0	2	2832,149,	0,3956,
2	15347350	15350212	mmu_retrom32676.0	0	-	15347350	15350212	0	1	2862,	0,
2	37611026	37612196	mmuiretrom31589.0	0	-	37611026	37612196	0	1	1170,	0,
2	45667078	45667648	mmu_retrop34134.0	0	+	45667078	45667648	0	1	570,	0,
2	46569460	46569994	mmuiretrom31373.0	0	-	46569460	46569994	0	1	534,	0,
2	51448845	51449048	mmu_retrom32872.0	0	-	51448845	51449048	0	1	203,	0,
2	54126119	54126475	mmu_retrop34249.0	0	+	54126119	54126475	0	1	356,	0,
2	77836316	77839114	mmuiretrom30568.0	0	-	77836316	77839114	0	1	2798,	0,
2	79070140	79071174	mmu_retrom33109.0	0	-	79070140	79071174	0	1	1034,	0,
2	87271870	87272033	mmu_retrom33141.0	0	-	87271870	87272033	0	1	163,	0,
2	90501126	90502491	mmu_retrom33156.0	0	-	90501126	90502491	0	1	1365,	0,
2	91658487	91659167	mmu_retrom33206.0	0	-	91658487	91659167	0	1	680,	0,
2	91881368	91914159	mmu_retrom33417.0	0	-	91881368	91914159	0	8	2392,145,319,7284,127,92,160,471,	0,8780,10224,12929,29535,29938,30643,32320,
2	92183590	92186361	mmu_retrop34845.0	0	+	92183590	92186361	0	1	2771,	0,
2	98019068	98020236	mmu_retrop34875.0	0	+	98019068	98020236	0	1	1168,	0,
2	98113038	98114306	mmu_retrop34876.0	0	+	98113038	98114306	0	1	1268,	0,
2	103791194	103791450	mmuiretrom31184.0	0	-	103791194	103791450	0	1	256,	0,
2	107550241	107568865	mmu_retrop34989.0	0	+	107550241	107568865	0	4	2450,192,199,507,	0,10757,16701,18117,
2	116368672	116369201	mmu_retrop35078.0	0	+	116368672	116369201	0	1	529,	0,
2	117246663	117249109	mmu_retrop35124.0	0	+	117246663	117249109	0	2	244,1055,	0,1391,
2	127112347	127114005	mmu_retrom33969.0	0	-	127112347	127114005	0	1	1658,	0,
2	127248691	127264923	mmu_retrom33972.0	0	-	127248691	127264923	0	12	2078,184,233,183,174,145,190,127,153,80,226,159,	0,2511,3150,4103,4711,5173,6956,10912,12227,13482,13673,16073,
2	128002490	128003089	mmu_retrop35182.0	0	+	128002490	128003089	0	1	599,	0,
2	130495940	130508297	mmu_retrop35236.0	0	+	130495940	130508297	0	7	3660,75,110,73,121,65,706,	0,3966,4478,6369,10418,11337,11651,
2	132030072	132030653	mmu_retrop35255.0	0	+	132030072	132030653	0	1	581,	0,
2	132360666	132362671	mmu_retrop35266.0	0	+	132360666	132362671	0	1	2005,	0,
2	137626149	137626821	mmu_retrop35311.0	0	+	137626149	137626821	0	1	672,	0,
2	151754758	151755273	mmu_retrop35547.0	0	+	151754758	151755273	0	1	515,	0,
2	151878547	151878938	mmu_retrom34272.0	0	-	151878547	151878938	0	1	391,	0,
2	187442710	187442897	mmu_retrop35896.0	0	+	187442710	187442897	0	1	187,	0,
20	1854833	1855561	mmu_retrop08390.0	0	+	1854833	1855561	0	1	728,	0,
20	3617281	3618002	mmu_retrop08533.0	0	+	3617281	3618002	0	1	721,	0,
20	8396113	8396788	mmu_retrom06942.0	0	-	8396113	8396788	0	1	675,	0,
20	28499538	28501745	mmuiretrom07436.0	0	-	28499538	28501745	0	1	2207,	0,
20	28899254	28900096	mmu_retrom07094.0	0	-	28899254	28900096	0	1	842,	0,
20	46773577	46774648	mmuiretrom06527.0	0	-	46773577	46774648	0	1	1071,	0,
20	57726712	57727878	mmuiretrop07714.0	0	+	57726712	57727878	0	1	1166,	0,
20	58093268	58094336	mmu_retrom07266.0	0	-	58093268	58094336	0	1	1068,	0,
20	66471064	66471721	mmu_retrom07298.0	0	-	66471064	66471721	0	1	657,	0,
20	67183566	67184041	mmu_retrop08883.0	0	+	67183566	67184041	0	1	475,	0,
20	73521630	73522192	mmuiretrom06556.0	0	-	73521630	73522192	0	1	562,	0,
20	74319608	74326787	mmu_retrom07504.0	0	-	74319608	74326787	0	3	426,128,955,	0,2895,6224,
20	80138645	80141523	mmuiretrom06988.0	0	-	80138645	80141523	0	2	2736,66,	0,2812,
20	80138645	80152843	mmuiretrom06988.1	0	-	80138645	80152843	0	3	2736,94,72,	0,3302,14126,
3	10449459	10450394	mmuiretrom32989.0	0	-	10449459	10450394	0	1	935,	0,
3	10678950	10680872	mmu_retrom34556.0	0	-	10678950	10680872	0	1	1922,	0,
3	12471537	12480843	mmuiretrom32552.0	0	-	12471537	12480843	0	2	1782,447,	0,8859,
3	15531368	15531640	mmu_retrop36006.0	0	+	15531368	15531640	0	1	272,	0,
3	17653048	17657285	mmu_retrop36036.0	0	+	17653048	17657285	0	2	274,553,	0,3684,
3	28981945	28982330	mmuiretrop36242.0	0	+	28981945	28982330	0	1	385,	0,
3	42853601	42856270	mmu_retrom34686.0	0	-	42853601	42856270	0	1	2669,	0,
3	44714497	44715311	mmu_retrom34708.0	0	-	44714497	44715311	0	1	814,	0,
3	50016885	50048977	mmu_retrop36393.0	0	+	50016885	50048977	0	2	281,3464,	0,28628,
3	71389062	71389997	mmu_retrop36486.1	0	+	71389062	71389997	0	1	935,	0,
3	74450787	74451307	mmu_retrop36495.0	0	+	74450787	74451307	0	1	520,	0,
3	77564641	77566561	mmu_retrop36525.0	0	+	77564641	77566561	0	1	1920,	0,
3	80456683	80457433	mmu_retrom35087.0	0	-	80456683	80457433	0	1	750,	0,
3	82390675	82390941	mmu_retrop36552.0	0	+	82390675	82390941	0	1	266,	0,
3	87580867	87582477	mmuiretrop35561.0	0	+	87580867	87582477	0	1	1610,	0,
3	87580867	87582477	mmuiretrop35561.1	0	+	87580867	87582477	0	2	706,807,	0,803,
3	93771706	93773162	mmu_retrom35196.0	0	-	93771706	93773162	0	1	1456,	0,
3	95826451	95924921	mmu_retrom35198.0	0	-	95826451	95924921	0	5	12811,80,106,96,1061,	0,16377,22622,54649,97409,
3	101036441	101038194	mmu_retrop36715.0	0	+	101036441	101038194	0	1	1753,	0,
3	102651114	102652892	mmu_retrop36728.0	0	+	102651114	102652892	0	1	1778,	0,
3	105941421	105941962	mmu_retrom35276.0	0	-	105941421	105941962	0	1	541,	0,
3	108119841	108120828	mmu_retrop36767.0	0	+	108119841	108120828	0	1	987,	0,
3	113699111	113701659	mmu_retrop36805.0	0	+	113699111	113701659	0	1	2548,	0,
3	113740439	113741912	mmuiretrom33774.0	0	-	113740439	113741912	0	1	1473,	0,
3	120127699	120127904	mmu_retrop36883.0	0	+	120127699	120127904	0	1	205,	0,
3	144730190	144730682	mmu_retrop37081.0	0	+	144730190	144730682	0	1	492,	0,
3	148783298	148784047	mmu_retrom35546.0	0	-	148783298	148784047	0	1	749,	0,
3	160212975	160214337	mmu_retrom35574.0	0	-	160212975	160214337	0	1	1362,	0,
3	160216495	160217736	mmuiretrom34527.0	0	-	160216495	160217736	0	1	1241,	0,
3	172130283	172164376	mmu_retrop37288.0	0	+	172130283	172164376	0	5	95,109,662,487,187,	0,526,15333,32096,33906,
3	172130283	172168989	mmu_retrop37288.1	0	+	172130283	172168989	0	4	95,662,487,187,	0,15333,32096,38519,
3	179982510	179982785	mmu_retrop37430.0	0	+	179982510	179982785	0	1	275,	0,
3	181148683	181151235	mmu_retrop37546.0	0	+	181148683	181151235	0	1	2552,	0,
3	181606510	181609094	mmu_retrop37616.0	0	+	181606510	181609094	0	1	2584,	0,
4	4063390	4135554	mmu_retrop25511.0	0	+	4063390	4135554	0	2	777,232,	0,71932,
4	5733080	5736810	mmu_retrom24277.0	0	-	5733080	5736810	0	1	3730,	0,
4	6693622	6694644	mmu_retrom24287.0	0	-	6693622	6694644	0	1	1022,	0,
4	7907286	7909556	mmu_retrop25541.0	0	+	7907286	7909556	0	1	2270,	0,
4	22540796	22542870	mmuiretrop23282.0	0	+	22540796	22542870	0	1	2074,	0,
4	24370479	24370964	mmu_retrop25669.0	0	+	24370479	24370964	0	1	485,	0,
4	26013902	26014767	mmuiretrop24585.0	0	+	26013902	26014767	0	1	865,	0,
4	26025671	26026493	mmuiretrom22998.0	0	-	26025671	26026493	0	1	822,	0,
4	26257472	26260401	mmuiretrom23008.1	0	-	26257472	26260401	0	1	2929,	0,
4	26258540	26260386	mmuiretrom23008.0	0	-	26258540	26260386	0	2	1027,515,	0,1331,
4	28787337	28789572	mmu_retrom25553.0	0	-	28787337	28789572	0	1	2235,	0,
4	29529273	29530235	mmu_retrop26607.0	0	+	29529273	29530235	0	1	962,	0,
4	31459019	31477228	mmu_retrom25709.0	0	-	31459019	31477228	0	3	2211,748,173,	0,5125,18036,
4	32576497	32577879	mmu_retrom25734.0	0	-	32576497	32577879	0	1	1382,	0,
4	33320638	33321281	mmu_retrom25745.0	0	-	33320638	33321281	0	1	643,	0,
4	36359096	36359336	mmu_retrom25823.0	0	-	36359096	36359336	0	1	240,	0,
4	37110133	37110902	mmu_retrop26864.0	0	+	37110133	37110902	0	1	769,	0,
4	42597057	42598859	mmuiretrop24400.0	0	+	42597057	42598859	0	1	1802,	0,
4	46052420	46054894	mmu_retrop26955.0	0	+	46052420	46054894	0	1	2474,	0,
4	49513185	49514813	mmu_retrom25906.0	0	-	49513185	49514813	0	1	1628,	0,
4	52839367	52839800	mmu_retrom25945.0	0	-	52839367	52839800	0	1	433,	0,
4	56593056	56595028	mmu_retrom25970.0	0	-	56593056	56595028	0	1	1972,	0,
4	57023708	57024143	mmu_retrom25989.0	0	-	57023708	57024143	0	1	435,	0,
4	67884880	67886061	mmu_retrop27157.0	0	+	67884880	67886061	0	1	1181,	0,
4	69399435	69400925	mmuiretrom22499.0	0	-	69399435	69400925	0	1	1490,	0,
4	69533116	69534295	mmu_retrop27180.0	0	+	69533116	69534295	0	1	1179,	0,
4	69534630	69536231	mmu_retrop27184.0	0	+	69534630	69536231	0	1	1601,	0,
4	71443982	71444242	mmuiretrom21810.0	0	-	71443982	71444242	0	1	260,	0,
4	87701223	87702087	mmuiretrom22545.0	0	-	87701223	87702087	0	1	864,	0,
4	94785512	94789560	mmuiretrop25452.0	0	+	94785512	94789560	0	1	4048,	0,
4	106587369	106588127	mmu_retrom26329.0	0	-	106587369	106588127	0	1	758,	0,
4	106869112	106869491	mmu_retrom26350.0	0	-	106869112	106869491	0	1	379,	0,
4	117473549	117473931	mmuiretrom22180.0	0	-	117473549	117473931	0	1	382,	0,
4	128498548	128498847	mmu_retrom26516.0	0	-	128498548	128498847	0	1	299,	0,
4	136463506	136464176	mmu_retrom26542.0	0	-	136463506	136464176	0	1	670,	0,
4	141622858	141623169	mmu_retrom26581.0	0	-	141622858	141623169	0	1	311,	0,
4	163256252	163257061	mmu_retrop28070.0	0	+	163256252	163257061	0	1	809,	0,
4	165209477	165211810	mmu_retrom26844.0	0	-	165209477	165211810	0	1	2333,	0,
4	167626416	167629788	mmuiretrop23474.0	0	+	167626416	167629788	0	2	598,904,	0,2468,
4	167628832	167629788	mmuiretrop23474.1	0	+	167628832	167629788	0	1	956,	0,
5	2087791	2089051	mmuiretrom30172.0	0	-	2087791	2089051	0	1	1260,	0,
5	8458526	8459333	mmu_retrom31624.0	0	-	8458526	8459333	0	1	807,	0,
5	9677028	9677336	mmu_retrom31626.0	0	-	9677028	9677336	0	1	308,	0,
5	16431697	16434921	mmu_retrom31642.0	0	-	16431697	16434921	0	1	3224,	0,
5	20262945	20265534	mmu_retrop32796.0	0	+	20262945	20265534	0	1	2589,	0,
5	34474356	34475963	mmu_retrop32863.0	0	+	34474356	34475963	0	1	1607,	0,
5	34474356	34475963	mmu_retrop32863.1	0	+	34474356	34475963	0	2	411,1065,	0,542,
5	37024149	37027268	mmu_retrop32916.0	0	+	37024149	37027268	0	1	3119,	0,
5	37024155	37025962	mmu_retrop32916.1	0	+	37024155	37025962	0	1	1807,	0,
5	41950281	42118676	mmuiretrom29276.0	0	-	41950281	42118676	0	3	373,55,105,	0,105004,168290,
5	46160716	46161021	mmu_retrom31715.0	0	-	46160716	46161021	0	1	305,	0,
5	50173859	50175716	mmu_retrop32951.0	0	+	50173859	50175716	0	1	1857,	0,
5	50256686	50267872	mmu_retrop32955.0	0	+	50256686	50267872	0	2	891,2917,	0,8269,
5	50834372	50835256	mmu_retrom31774.0	0	-	50834372	50835256	0	1	884,	0,
5	61181741	61182387	mmu_retrom31871.0	0	-	61181741	61182387	0	1	646,	0,
5	62085551	62085742	mmu_retrom31878.0	0	-	62085551	62085742	0	1	191,	0,
5	73288632	73288988	mmu_retrom31989.0	0	-	73288632	73288988	0	1	356,	0,
5	75379600	75380223	mmuiretrom29339.0	0	-	75379600	75380223	0	1	623,	0,
5	85791581	85793076	mmu_retrom32048.0	0	-	85791581	85793076	0	1	1495,	0,
5	88796849	88798205	mmu_retrop33230.0	0	+	88796849	88798205	0	1	1356,	0,
5	91910902	91929761	mmu_retrom32070.0	0	-	91910902	91929761	0	3	785,118,1006,	0,11161,17853,
5	91910902	91929761	mmu_retrom32070.0	0	-	91910902	91929761	0	3	785,118,1006,	0,11161,17853,
5	92055303	92056119	mmu_retrom32071.0	0	-	92055303	92056119	0	1	816,	0,
5	92213844	92214047	mmuiretrom29366.0	0	-	92213844	92214047	0	1	203,	0,
5	94508640	94508782	mmu_retrop33261.0	0	+	94508640	94508782	0	1	142,	0,
5	96641060	96641478	mmu_retrop33300.0	0	+	96641060	96641478	0	1	418,	0,
5	106776525	106853315	mmu_retrom32204.0	0	-	106776525	106853315	0	3	422,1367,396,	0,518,76394,
5	109581526	109583661	mmu_retrop33407.0	0	+	109581526	109583661	0	1	2135,	0,
5	109977099	109978491	mmu_retrom32216.0	0	-	109977099	109978491	0	1	1392,	0,
5	114471422	114471692	mmu_retrop33436.0	0	+	114471422	114471692	0	1	270,	0,
5	121316411	121316663	mmu_retrom32275.0	0	-	121316411	121316663	0	1	252,	0,
5	121433999	121434252	mmu_retrom32280.0	0	-	121433999	121434252	0	1	253,	0,
5	145272541	145272928	mmu_retrom32423.0	0	-	145272541	145272928	0	1	387,	0,
5	149192645	149194165	mmu_retrop33699.0	0	+	149192645	149194165	0	1	1520,	0,
5	152238265	152238744	mmuiretrop31517.0	0	+	152238265	152238744	0	1	479,	0,
5	157455550	157457570	mmu_retrom32458.0	0	-	157455550	157457570	0	1	2020,	0,
5	165738446	165738979	mmuiretrop31704.0	0	+	165738446	165738979	0	1	533,	0,
6	10157373	10170893	mmu_retrom29875.1	0	-	10157373	10170893	0	4	1414,51,138,275,	0,9384,10660,13245,
6	10158142	10170893	mmu_retrom29875.0	0	-	10158142	10170893	0	4	645,51,138,275,	0,8615,9891,12476,
6	37048780	37051716	mmu_retrop30637.0	0	+	37048780	37051716	0	1	2936,	0,
6	37124947	37126753	mmu_retrom30021.0	0	-	37124947	37126753	0	1	1806,	0,
6	42792455	42793336	mmu_retrop30690.0	0	-	42792455	42793336	0	1	881,	0,
6	42792455	42793336	mmu_retrop30690.0	0	-	42792455	42793336	0	1	881,	0,
6	48162658	48162920	mmuiretrop28702.0	0	+	48162658	48162920	0	1	262,	0,
6	53206469	53207520	mmuiretrom27545.0	0	-	53206469	53207520	0	1	1051,	0,
6	61370089	61371963	mmu_retrop30866.0	0	+	61370089	61371963	0	1	1874,	0,
6	67233120	67238254	mmu_retrom30456.1	0	-	67233120	67238254	0	3	918,93,125,	0,1960,5009,
6	67233121	67238253	mmu_retrom30456.0	0	-	67233121	67238253	0	3	917,93,84,	0,1959,5048,
6	74414950	74415727	mmu_retrop31034.0	0	+	74414950	74415727	0	1	777,	0,
6	75584171	75584646	mmu_retrom30557.0	0	-	75584171	75584646	0	1	475,	0,
6	76541566	76542885	mmu_retrom30567.0	0	-	76541566	76542885	0	1	1319,	0,
6	79180842	79180938	mmu_retrop31190.0	0	+	79180842	79180938	0	1	96,	0,
6	97668302	97670479	mmu_retrom30752.0	0	-	97668302	97670479	0	1	2177,	0,
6	105588724	105588950	mmuiretrop29315.0	0	+	105588724	105588950	0	1	226,	0,
6	106193033	106194381	mmu_retrom30783.0	0	-	106193033	106194381	0	1	1348,	0,
6	109658709	109658794	mmuiretrom27177.0	0	-	109658709	109658794	0	1	85,	0,
6	117783070	117784952	mmu_retrop31483.0	0	+	117783070	117784952	0	1	1882,	0,
6	118293900	118295320	mmuiretrop30551.0	0	+	118293900	118295320	0	1	1420,	0,
6	127427006	127428551	mmuiretrop29349.0	0	+	127427006	127428551	0	1	1545,	0,
6	134151247	134155004	mmu_retrom30999.0	0	-	134151247	134155004	0	1	3757,	0,
6	134163696	134164062	mmu_retrop31620.0	0	-	134163696	134164062	0	1	366,	0,
6	134163696	134164062	mmu_retrop31620.0	0	-	134163696	134164062	0	1	366,	0,
6	135898863	135899815	mmuiretrom27701.0	0	-	135898863	135899815	0	1	952,	0,
6	136334699	136335238	mmu_retrop31670.0	0	+	136334699	136335238	0	1	539,	0,
6	137692500	137693970	mmu_retrom31060.0	0	-	137692500	137693970	0	1	1470,	0,
6	137708593	137710795	mmu_retrom31065.1	0	-	137708593	137710795	0	1	2202,	0,
6	145534143	145535601	mmuiretrom27722.0	0	-	145534143	145535601	0	1	1458,	0,
6	146775463	146781421	mmu_retrom31160.0	0	-	146775463	146781421	0	2	2231,273,	0,5685,
6	151382825	151387225	mmuiretrop29099.0	0	+	151382825	151387225	0	1	4400,	0,
6	160052280	160053876	mmu_retrom31238.0	0	-	160052280	160053876	0	1	1596,	0,
6	164906552	164908904	mmu_retrop32167.1	0	+	164906552	164908904	0	1	2352,	0,
6	164930431	164933672	mmu_retrom31250.0	0	-	164930431	164933672	0	1	3241,	0,
6	164964411	164964904	mmu_retrop32177.0	0	+	164964411	164964904	0	1	493,	0,
6	167425431	167425834	mmu_retrom31286.0	0	-	167425431	167425834	0	1	403,	0,
6	172620491	172628684	mmu_retrop32227.0	0	+	172620491	172628684	0	4	97,125,170,813,	0,4739,5005,7380,
6	173789425	173790264	mmuiretrom28458.0	0	-	173789425	173790264	0	1	839,	0,
6	174735450	174736259	mmu_retrop32245.0	0	+	174735450	174736259	0	1	809,	0,
6	175557693	175583513	mmu_retrop32515.0	0	+	175557693	175583513	0	5	234,140,127,90,1512,	0,1481,5550,6085,24308,
6	175557693	175583513	mmu_retrop32515.1	0	+	175557693	175583513	0	5	291,140,127,90,1512,	0,1481,5550,6085,24308,
6	176356171	176357057	mmu_retrom31339.0	0	-	176356171	176357057	0	1	886,	0,
6	176622076	176622569	mmu_retrom31347.0	0	-	176622076	176622569	0	1	493,	0,
6	177527378	177533515	mmu_retrom31540.0	0	-	177527378	177533515	0	1	6137,	0,
6	177527378	177542938	mmu_retrom31540.1	0	-	177527378	177542938	0	2	6109,46,	0,15514,
7	5030385	5064165	mmu_retrom26863.1	0	-	5030385	5064165	0	2	539,1116,	0,32664,
7	13440025	13440973	mmu_retrop28155.0	0	+	13440025	13440973	0	1	948,	0,
7	15104328	15145185	mmu_retrom26915.0	0	-	15104328	15145185	0	3	785,99,1590,	0,31109,39267,
7	18644752	18649969	mmu_retrom26953.0	0	-	18644752	18649969	0	2	2438,177,	0,5040,
7	18644752	18649969	mmu_retrom26953.2	0	-	18644752	18649969	0	2	2438,177,	0,5040,
7	19262952	19264595	mmu_retrom26964.0	0	-	19262952	19264595	0	2	1300,155,	0,1488,
7	19262952	19264990	mmu_retrom26964.1	0	-	19262952	19264990	0	3	1300,59,303,	0,1488,1735,
7	24764424	24765075	mmu_retrop28299.0	0	+	24764424	24765075	0	1	651,	0,
7	26385478	26386978	mmu_retrop28310.0	0	+	26385478	26386978	0	1	1500,	0,
7	28113626	28115773	mmu_retrop28337.0	0	+	28113626	28115773	0	1	2147,	0,
7	28113626	28117825	mmu_retrop28337.1	0	+	28113626	28117825	0	2	1207,182,	0,4017,
7	37578804	37580398	mmu_retrop28449.0	0	+	37578804	37580398	0	1	1594,	0,
7	38224051	38224395	mmuiretrom25766.0	0	-	38224051	38224395	0	1	344,	0,
7	54201830	54206352	mmu_retrom27382.0	0	-	54201830	54206352	0	1	4522,	0,
7	56948940	56949536	mmu_retrop28758.0	0	+	56948940	56949536	0	1	596,	0,
7	58677235	58679368	mmu_retrom27436.0	0	-	58677235	58679368	0	1	2133,	0,
7	69925268	69926518	mmu_retrop28858.0	0	+	69925268	69926518	0	1	1250,	0,
7	70468127	70468406	mmu_retrom27665.0	0	-	70468127	70468406	0	1	279,	0,
7	72483618	72485089	mmu_retrop28971.0	0	+	72483618	72485089	0	1	1471,	0,
7	76672546	76674823	mmuiretrop27789.0	0	+	76672546	76674823	0	1	2277,	0,
7	97887201	97897716	mmu_retrop29625.0	0	+	97887201	97897716	0	3	103,61,1561,	0,4916,8954,
7	107335188	107335590	mmu_retrop29798.0	0	+	107335188	107335590	0	1	402,	0,
7	108941799	108942129	mmu_retrom28560.0	0	-	108941799	108942129	0	1	330,	0,
7	109744250	109745789	mmu_retrom28576.0	0	-	109744250	109745789	0	1	1539,	0,
7	111110024	111110728	mmu_retrom28599.0	0	-	111110024	111110728	0	1	704,	0,
7	112953923	112958257	mmu_retrop29840.0	0	+	112953923	112958257	0	2	465,3769,	0,565,
7	115733632	115735124	mmu_retrop29862.0	0	+	115733632	115735124	0	1	1492,	0,
7	118785025	118785874	mmu_retrop29917.0	0	+	118785025	118785874	0	1	849,	0,
7	121827117	121828365	mmu_retrom28756.0	0	-	121827117	121828365	0	1	1248,	0,
7	127541535	127543319	mmu_retrop30022.0	0	+	127541535	127543319	0	2	66,1502,	0,282,
7	127541535	127543319	mmu_retrop30022.1	0	+	127541535	127543319	0	1	1784,	0,
7	129471983	129472560	mmu_retrop30093.0	0	+	129471983	129472560	0	1	577,	0,
7	135296889	135297253	mmu_retrop30166.0	0	-	135296889	135297253	0	1	364,	0,
7	135296889	135297253	mmu_retrop30166.0	0	-	135296889	135297253	0	1	364,	0,
7	136670468	136671357	mmu_retrop30187.0	0	+	136670468	136671357	0	1	889,	0,
7	166039436	166040309	mmuiretrop26958.0	0	+	166039436	166040309	0	1	873,	0,
7	166174670	166175051	mmu_retrom29200.0	0	-	166174670	166175051	0	1	381,	0,
8	8947020	8948297	mmuiretrom20493.0	0	-	8947020	8948297	0	1	1277,	0,
8	21359072	21359811	mmu_retrop22282.0	0	+	21359072	21359811	0	1	739,	0,
8	30857564	30857953	mmuiretrop22235.0	0	+	30857564	30857953	0	1	389,	0,
8	38190627	38191931	mmu_retrom20968.0	0	-	38190627	38191931	0	1	1304,	0,
8	53060440	53060871	mmuiretrom20599.0	0	-	53060440	53060871	0	1	431,	0,
8	55704641	55706016	mmu_retrom21111.1	0	-	55704641	55706016	0	1	1375,	0,
8	55704641	55706098	mmu_retrom21111.0	0	-	55704641	55706098	0	1	1457,	0,
8	78067228	78068745	mmuiretrop22320.0	0	+	78067228	78068745	0	1	1517,	0,
8	78067236	78069675	mmuiretrop22320.1	0	+	78067236	78069675	0	2	580,26,	0,2413,
8	82727632	82728052	mmu_retrop22732.0	0	+	82727632	82728052	0	1	420,	0,
8	83253952	83254394	mmuiretrop22323.0	0	+	83253952	83254394	0	1	442,	0,
8	90511440	90514733	mmu_retrom21300.0	0	-	90511440	90514733	0	1	3293,	0,
8	127032349	127035335	mmuiretrop23105.0	0	+	127032349	127035335	0	1	2986,	0,
8	147491223	147493205	mmu_retrop23386.0	0	+	147491223	147493205	0	1	1982,	0,
8	147614596	147662357	mmu_retrom22425.2	0	-	147614596	147662357	0	5	5324,114,167,160,1745,	0,37187,42734,45329,46016,
8	147614637	147660503	mmu_retrom22425.0	0	-	147614637	147660503	0	5	5283,114,167,160,54,	0,37146,42693,45288,45812,
8	147614637	147660503	mmu_retrom22425.1	0	-	147614637	147660503	0	4	5283,114,167,376,	0,37146,42693,45490,
9	646534	647329	mmuiretrop16661.0	0	+	646534	647329	0	1	795,	0,
9	5794590	5795521	mmu_retrop16364.0	0	+	5794590	5795521	0	1	931,	0,
9	15453737	15454574	mmu_retrop16382.0	0	-	15453737	15454574	0	1	837,	0,
9	15453737	15454574	mmu_retrop16382.0	0	-	15453737	15454574	0	1	837,	0,
9	27308801	27313840	mmu_retrom14616.0	0	-	27308801	27313840	0	1	5039,	0,
9	36865394	36866200	mmuiretrop16902.0	0	+	36865394	36866200	0	1	806,	0,
9	37883687	37884926	mmu_retrom14763.0	0	-	37883687	37884926	0	1	1239,	0,
9	43527981	43528732	mmu_retrop16613.0	0	+	43527981	43528732	0	1	751,	0,
9	43528392	43528732	mmu_retrop16613.1	0	+	43528392	43528732	0	1	340,	0,
9	43545707	43570082	mmu_retrom14788.2	0	-	43545707	43570082	0	4	1829,59,135,26,	0,9131,10937,24349,
9	43545709	43569752	mmu_retrom14788.1	0	-	43545709	43569752	0	4	1827,59,135,101,	0,9129,10935,23942,
9	43545712	43569752	mmu_retrom14788.0	0	-	43545712	43569752	0	3	1824,135,101,	0,10932,23939,
9	45379332	45380655	mmu_retrom14845.0	0	-	45379332	45380655	0	1	1323,	0,
9	59266917	59322411	mmu_retrop16818.1	0	+	59266917	59322411	0	5	3410,1307,105,86,1,	0,4122,6611,52943,55493,
9	64807643	64808236	mmu_retrom15009.0	0	-	64807643	64808236	0	1	593,	0,
9	79113383	79114214	mmu_retrop17018.0	0	+	79113383	79114214	0	1	831,	0,
9	85559910	85562403	mmu_retrop17063.0	0	+	85559910	85562403	0	1	2493,	0,
9	105368479	105368749	mmuiretrom15983.0	0	-	105368479	105368749	0	1	270,	0,
9	108345622	108346256	mmu_retrop17281.0	0	+	108345622	108346256	0	1	634,	0,
9	118548611	118549043	mmu_retrop17370.0	0	+	118548611	118549043	0	1	432,	0,
9	123588380	123589964	mmu_retrop17409.0	0	+	123588380	123589964	0	1	1584,	0,
9	129742470	129745530	mmu_retrop17473.0	0	+	129742470	129745530	0	1	3060,	0,
X	11015970	11017322	mmu_retrom22451.0	0	-	11015970	11017322	0	1	1352,	0,
X	11015971	11017322	mmu_retrom22451.1	0	-	11015971	11017322	0	2	752,335,	0,1016,
X	19618282	19619171	mmu_retrop23548.0	0	+	19618282	19619171	0	1	889,	0,
X	20047537	20049008	mmu_retrop23550.1	0	+	20047537	20049008	0	1	1471,	0,
X	20795135	20796944	mmu_retrop23557.0	0	+	20795135	20796944	0	1	1809,	0,
X	25305779	25308819	mmu_retrom22578.0	0	-	25305779	25308819	0	1	3040,	0,
X	25834825	25836244	mmu_retrom22588.0	0	-	25834825	25836244	0	1	1419,	0,
X	26745636	26746220	mmu_retrop23620.0	0	+	26745636	26746220	0	1	584,	0,
X	28954213	28955057	mmu_retrom22639.0	0	-	28954213	28955057	0	1	844,	0,
X	38101772	38105145	mmu_retrom22740.0	0	-	38101772	38105145	0	1	3373,	0,
X	38302581	38303997	mmu_retrom22750.0	0	-	38302581	38303997	0	1	1416,	0,
X	39162552	39162926	mmu_retrop23824.0	0	+	39162552	39162926	0	1	374,	0,
X	43542335	43543041	mmu_retrop23850.0	0	+	43542335	43543041	0	1	706,	0,
X	47515698	47517902	mmu_retrop23959.0	0	+	47515698	47517902	0	1	2204,	0,
X	49159116	49165820	mmu_retrom22976.0	0	-	49159116	49165820	0	2	1651,879,	0,5825,
X	49269861	49271686	mmu_retrom22982.0	0	-	49269861	49271686	0	1	1825,	0,
X	55011345	55014618	mmu_retrop24072.0	0	+	55011345	55014618	0	1	3273,	0,
X	55371971	55376658	mmu_retrom23028.0	0	-	55371971	55376658	0	1	4687,	0,
X	55563065	55565099	mmu_retrom23079.1	0	-	55563065	55565099	0	1	2034,	0,
X	55563780	55565089	mmu_retrom23079.0	0	-	55563780	55565089	0	2	227,478,	0,831,
X	62109400	62110372	mmu_retrom23102.0	0	-	62109400	62110372	0	1	972,	0,
X	69029794	69030820	mmu_retrop24263.0	0	+	69029794	69030820	0	1	1026,	0,
X	72608859	72609730	mmu_retrom23210.0	0	-	72608859	72609730	0	1	871,	0,
X	73409068	73410216	mmu_retrop24354.0	0	+	73409068	73410216	0	1	1148,	0,
X	74365667	74366036	mmu_retrop24370.0	0	+	74365667	74366036	0	1	369,	0,
X	74683547	74688667	mmu_retrom23238.0	0	-	74683547	74688667	0	1	5120,	0,
X	84928339	84929083	mmu_retrom23341.0	0	-	84928339	84929083	0	1	744,	0,
X	92359236	92395453	mmu_retrop24513.0	0	+	92359236	92395453	0	4	91,73,90,798,	0,498,24254,35419,
X	92381447	92395453	mmu_retrop24513.1	0	+	92381447	92395453	0	3	78,90,798,	0,2043,13208,
X	100125995	100132003	mmu_retrop24621.0	0	+	100125995	100132003	0	2	95,2107,	0,3901,
X	102377216	102387321	mmu_retrom23598.0	0	-	102377216	102387321	0	3	3502,74,379,	0,4667,9726,
X	118162046	118162632	mmu_retrop24883.0	0	+	118162046	118162632	0	1	586,	0,
X	119490573	119491034	mmu_retrom23839.0	0	-	119490573	119491034	0	1	461,	0,
X	123293582	123294136	mmu_retrop24977.0	0	+	123293582	123294136	0	1	554,	0,
X	124385330	124388101	mmu_retrom23856.0	0	-	124385330	124388101	0	1	2771,	0,
X	124385330	124388101	mmu_retrom23856.1	0	-	124385330	124388101	0	2	890,1801,	0,970,
X	126525025	126525325	mmu_retrop24985.0	0	+	126525025	126525325	0	1	300,	0,
X	128791171	128792221	mmu_retrom23889.0	0	-	128791171	128792221	0	1	1050,	0,
X	134881178	134882573	mmu_retrom23970.0	0	-	134881178	134882573	0	1	1395,	0,
X	138267645	138268919	mmu_retrop25194.0	0	+	138267645	138268919	0	1	1274,	0,
X	148035352	148035782	mmu_retrom24053.0	0	-	148035352	148035782	0	2	221,205,	0,225,
X	150839079	150840734	mmu_retrom24119.0	0	-	150839079	150840734	0	2	1528,47,	0,1608,

## Sheet: Mouse
# Supplemental Table S11: Retrocopy transcripts in mouse (BED12 format)
Chromosome	Start	End	Transcript_ID	Score (not defined)	Strand	Thick Start (not defined)	Thick End (not defined)	Item_RGB (not defined)	Exon_count	Exon_sizes	Exon_starts
1	4600518	4601477	mus_retrop112711.0	0	+	4600518	4601477	0	1	959,	0,
1	16759190	16760208	mus_retrom123890.0	0	-	16759190	16760208	0	1	1018,	0,
1	19143520	19144023	mus_retrom123903.0	0	-	19143520	19144023	0	2	285,213,	0,290,
1	23107362	23109060	mus_retrom123929.0	0	-	23107362	23109060	0	1	1698,	0,
1	31279673	31280970	mus_retrop112996.0	0	+	31279673	31280970	0	1	1297,	0,
1	32575024	32578029	musiretrom41448.0	0	-	32575024	32578029	0	1	3005,	0,
1	32599486	32604209	musiretrom41190.0	0	-	32599486	32604209	0	1	4723,	0,
1	37317461	37318967	mus_retrop113049.0	0	+	37317461	37318967	0	1	1506,	0,
1	37544004	37545478	mus_retrom124016.0	0	-	37544004	37545478	0	1	1474,	0,
1	45914285	45914577	mus_retrom124055.0	0	-	45914285	45914577	0	1	292,	0,
1	55392354	55392718	mus_retrop113304.0	0	+	55392354	55392718	0	1	364,	0,
1	78654099	78664148	musiretrop40316.0	0	+	78654099	78664148	0	3	579,140,3248,	0,5616,6801,
1	90100089	90102303	mus_retrom124477.0	0	-	90100089	90102303	0	1	2214,	0,
1	97395218	97395773	mus_retrop113816.0	0	+	97395218	97395773	0	1	555,	0,
1	100354865	100355609	mus_retrop113876.0	0	+	100354865	100355609	0	1	744,	0,
1	121418892	121424835	mus_retrop114001.1	0	+	121418892	121424835	0	1	5943,	0,
1	141532704	141533988	mus_retrop114141.0	0	+	141532704	141533988	0	1	1284,	0,
1	152981764	152992978	mus_retrop114215.0	0	+	152981764	152992978	0	6	10,2630,861,179,414,3134,	0,1370,4258,6892,7567,8080,
1	158296211	158296658	mus_retrop114296.0	0	+	158296211	158296658	0	1	447,	0,
1	159342768	159350352	mus_retrop114307.0	0	+	159342768	159350352	0	3	488,52,353,	0,1106,7231,
1	173433611	173434850	musiretrop42304.0	0	+	173433611	173434850	0	1	1239,	0,
1	177614724	177618693	mus_retrom125011.0	0	-	177614724	177618693	0	1	3969,	0,
1	182257160	182260670	mus_retrom125095.0	0	-	182257160	182260670	0	2	1202,55,	0,3455,
1	188791019	188794754	mus_retrop114705.1	0	+	188791019	188794754	0	1	3735,	0,
1	193897635	193898256	mus_retrom125188.0	0	-	193897635	193898256	0	1	621,	0,
1	194714704	194715288	mus_retrop114730.0	0	+	194714704	194715288	0	1	584,	0,
10	13610432	13611080	mus_retrom69014.0	0	-	13610432	13611080	0	1	648,	0,
10	18022322	18022934	mus_retrom69040.0	0	-	18022322	18022934	0	1	612,	0,
10	20084520	20085599	mus_retrom69060.0	0	-	20084520	20085599	0	1	1079,	0,
10	21784980	21788274	mus_retrom69093.1	0	-	21784980	21788274	0	1	3294,	0,
10	24971519	24972212	mus_retrop70222.0	0	+	24971519	24972212	0	1	693,	0,
10	28749933	28751486	mus_retrop70265.0	0	+	28749933	28751486	0	1	1553,	0,
10	33528471	33529148	mus_retrom69328.0	0	-	33528471	33529148	0	1	677,	0,
10	43881191	43890138	mus_retrom69408.0	0	-	43881191	43890138	0	2	87,824,	0,8123,
10	43887219	43890138	mus_retrom69408.1	0	-	43887219	43890138	0	2	418,824,	0,2095,
10	43888071	43890140	mus_retrom69408.2	0	-	43888071	43890140	0	1	2069,	0,
10	48812823	48816494	mus_retrom69414.0	0	-	48812823	48816494	0	1	3671,	0,
10	51475987	51476999	mus_retrom69416.1	0	-	51475987	51476999	0	1	1012,	0,
10	51475988	51476998	mus_retrom69416.0	0	-	51475988	51476998	0	2	253,382,	0,628,
10	52262069	52265601	mus_retrom69436.0	0	-	52262069	52265601	0	1	3532,	0,
10	55803655	55836670	musiretrop19621.0	0	+	55803655	55836670	0	3	190,151,2011,	0,22363,31004,
10	55834659	55836670	musiretrop19621.1	0	+	55834659	55836670	0	1	2011,	0,
10	57909426	57957625	mus_retrop70539.0	0	+	57909426	57957625	0	29	373,68,112,153,231,146,193,88,210,182,176,124,162,138,147,180,84,136,95,4663,171,87,179,202,102,146,274,335,1215,	0,5305,6633,7894,8540,9130,10913,13839,15157,17140,17404,17726,18386,18765,18984,20436,20711,23948,28565,29478,36350,37218,37763,39001,41894,43931,45732,46123,46984,
10	57909428	57956730	mus_retrop70539.2	0	+	57909428	57956730	0	29	371,68,112,153,231,146,193,88,210,182,176,124,162,138,147,180,84,136,95,4663,171,87,179,202,102,146,274,335,320,	0,5303,6631,7892,8538,9128,10911,13837,15155,17138,17402,17724,18384,18763,18982,20434,20709,23946,28563,29476,36348,37216,37761,38999,41892,43929,45730,46121,46982,
10	57909428	57956927	mus_retrop70539.1	0	+	57909428	57956927	0	29	371,68,112,153,231,146,193,88,210,182,176,124,162,138,147,180,84,136,95,4663,171,87,179,202,102,146,274,335,517,	0,5303,6631,7892,8538,9128,10911,13837,15155,17138,17402,17724,18384,18763,18982,20434,20709,23946,28563,29476,36348,37216,37761,38999,41892,43929,45730,46121,46982,
10	61533871	61534994	mus_retrop70565.0	0	+	61533871	61534994	0	1	1123,	0,
10	62884017	62884423	mus_retrom69486.0	0	-	62884017	62884423	0	1	406,	0,
10	70945744	70946295	mus_retrop70610.0	0	+	70945744	70946295	0	1	551,	0,
10	71442374	71443432	mus_retrom69527.1	0	-	71442374	71443432	0	1	1058,	0,
10	71442793	71443432	mus_retrom69527.0	0	-	71442793	71443432	0	1	639,	0,
10	74441534	74479649	mus_retrop70634.0	0	+	74441534	74479649	0	3	67,1207,2037,	0,12144,36078,
10	82329388	82330653	mus_retrop71221.0	0	+	82329388	82330653	0	1	1265,	0,
10	84560492	84565210	mus_retrom69830.0	0	-	84560492	84565210	0	2	1741,170,	0,4548,
10	99219165	99222249	mus_retrom69970.1	0	-	99219165	99222249	0	1	3084,	0,
10	115548772	115551287	mus_retrom70053.0	0	-	115548772	115551287	0	1	2515,	0,
11	3370915	3371175	mus_retrom58620.0	0	-	3370915	3371175	0	1	260,	0,
11	3851931	3852191	mus_retrop54782.0	0	+	3851931	3852191	0	1	260,	0,
11	17874201	17874460	mus_retrom58817.0	0	-	17874201	17874460	0	1	259,	0,
11	22657406	22660065	mus_retrom58893.0	0	-	22657406	22660065	0	1	2659,	0,
11	22657406	22662711	mus_retrom58893.1	0	-	22657406	22662711	0	3	2628,100,190,	0,3972,5115,
11	22657406	22675029	mus_retrom58893.2	0	-	22657406	22675029	0	2	2628,136,	0,17487,
11	22872027	22874840	mus_retrop55007.0	0	+	22872027	22874840	0	1	2813,	0,
11	28239131	28239873	mus_retrom58907.0	0	-	28239131	28239873	0	1	742,	0,
11	35608503	35612332	mus_retrom59026.0	0	-	35608503	35612332	0	1	3829,	0,
11	48758983	48759351	mus_retrom59169.0	0	-	48758983	48759351	0	1	368,	0,
11	51498922	51502540	mus_retrom59282.0	0	-	51498922	51502540	0	2	672,491,	0,3127,
11	54931617	54932137	mus_retrom59418.0	0	-	54931617	54932137	0	1	520,	0,
11	56272967	56273571	mus_retrop56403.0	0	+	56272967	56273571	0	1	604,	0,
11	58322380	58322682	musiretrom12912.0	0	-	58322380	58322682	0	1	302,	0,
11	58775115	58786507	musiretrop13650.0	0	+	58775115	58786507	0	7	2256,434,96,231,23,104,1979,	0,3500,5160,6873,8813,8928,9413,
11	61302344	61307728	musiretrom14733.1	0	-	61302344	61307728	0	6	428,565,1341,220,308,147,	0,521,1503,4007,4804,5237,
11	61302347	61306912	musiretrom14733.0	0	-	61302347	61306912	0	5	425,134,656,1079,507,	0,518,1003,1762,4058,
11	61302347	61307722	musiretrom14733.2	0	-	61302347	61307722	0	8	425,134,80,159,1079,166,308,141,	0,518,1003,1500,1762,4058,4801,5234,
11	62462228	62479848	mus_retrop56772.1	0	+	62462228	62479848	0	3	130,566,603,	0,15943,17017,
11	62462228	62479849	mus_retrop56772.0	0	+	62462228	62479849	0	2	90,1678,	0,15943,
11	63125880	63126709	mus_retrom60084.0	0	-	63125880	63126709	0	1	829,	0,
11	76031153	76032157	musiretrop12558.0	0	+	76031153	76032157	0	2	97,429,	0,575,
11	78564013	78565164	musiretrom13595.0	0	-	78564013	78565164	0	1	1151,	0,
11	81386064	81387068	mus_retrom61496.0	0	-	81386064	81387068	0	1	1004,	0,
11	85998964	85999249	musiretrop13198.0	0	+	85998964	85999249	0	1	285,	0,
11	94603330	94604226	mus_retrop58124.0	0	+	94603330	94604226	0	1	896,	0,
11	100104574	100104673	mus_retrop58257.0	0	+	100104574	100104673	0	1	99,	0,
11	110927486	110938064	mus_retrop58367.0	0	+	110927486	110938064	0	2	162,5202,	0,5376,
12	4789025	4790196	mus_retrop53075.0	0	+	4789025	4790196	0	1	1171,	0,
12	8504475	8506803	mus_retrom49633.0	0	-	8504475	8506803	0	1	2328,	0,
12	12918843	12919177	mus_retrop53141.0	0	+	12918843	12919177	0	1	334,	0,
12	25322895	25323798	mus_retrom50089.1	0	-	25322895	25323798	0	1	903,	0,
12	35669461	35671056	mus_retrop53855.0	0	+	35669461	35671056	0	1	1595,	0,
12	55802307	55802669	mus_retrom50287.0	0	-	55802307	55802669	0	1	362,	0,
12	56666216	56667800	mus_retrop53974.0	0	+	56666216	56667800	0	1	1584,	0,
12	58331477	58342726	mus_retrop53990.0	0	+	58331477	58342726	0	2	121,3377,	0,7872,
12	62454957	62455733	mus_retrom50401.0	0	-	62454957	62455733	0	1	776,	0,
12	66326558	66329409	mus_retrop54074.1	0	+	66326558	66329409	0	2	1926,215,	0,2636,
12	67384376	67385374	mus_retrom50460.0	0	-	67384376	67385374	0	1	998,	0,
12	70283747	70285011	mus_retrom50473.0	0	-	70283747	70285011	0	2	405,42,	0,1222,
12	70473136	70476954	mus_retrop54112.0	0	+	70473136	70476954	0	2	74,3644,	0,174,
12	71021494	71022136	mus_retrom50516.0	0	-	71021494	71022136	0	1	642,	0,
12	72947665	72948044	mus_retrom50556.0	0	-	72947665	72948044	0	1	379,	0,
12	74644449	74647402	mus_retrom50572.0	0	-	74644449	74647402	0	1	2953,	0,
12	77505235	77507886	mus_retrop54154.0	0	+	77505235	77507886	0	2	41,2371,	0,280,
12	85599300	85599592	mus_retrom50669.0	0	-	85599300	85599592	0	1	292,	0,
12	96152212	96154583	musiretrom10607.0	0	-	96152212	96154583	0	1	2371,	0,
12	102383740	102387917	mus_retrop54426.0	0	+	102383740	102387917	0	1	4177,	0,
12	107696654	107697738	mus_retrop54498.1	0	+	107696654	107697738	0	1	1084,	0,
13	3116154	3139398	mus_retrom46694.0	0	-	3116154	3139398	0	3	393,334,1643,	0,1667,21601,
13	3802562	3803832	mus_retrom46702.0	0	-	3802562	3803832	0	1	1270,	0,
13	21592897	21593135	mus_retrom47016.1	0	-	21592897	21593135	0	1	238,	0,
13	21592897	21593283	mus_retrom47016.0	0	-	21592897	21593283	0	1	386,	0,
13	23852564	23854363	musiretrom09420.0	0	-	23852564	23854363	0	1	1799,	0,
13	24411969	24413059	mus_retrop51853.0	0	+	24411969	24413059	0	1	1090,	0,
13	33212768	33213220	mus_retrom48384.0	0	-	33212768	33213220	0	1	452,	0,
13	34826715	34839438	mus_retrop51942.0	0	+	34826715	34839438	0	2	62,1116,	0,11607,
13	34831518	34839438	mus_retrop51942.1	0	+	34831518	34839438	0	2	138,1116,	0,6804,
13	47104632	47106309	mus_retrom48516.0	0	-	47104632	47106309	0	1	1677,	0,
13	59788812	59795466	mus_retrop52130.0	0	-	59788812	59795466	0	6	2250,51,147,99,182,69,	0,2997,3346,4106,5933,6585,
13	59788812	59795466	mus_retrop52130.1	0	-	59788812	59795466	0	7	1990,164,47,147,99,182,69,	0,2086,2997,3346,4106,5933,6585,
13	59788812	59795466	mus_retrop52130.2	0	-	59788812	59795466	0	5	2250,496,99,182,69,	0,2997,4106,5933,6585,
13	59788812	59795466	mus_retrop52130.3	0	-	59788812	59795466	0	6	2250,51,276,99,182,69,	0,2997,3217,4106,5933,6585,
13	59801514	59812585	mus_retrom48647.0	0	-	59801514	59812585	0	6	3869,61,43,927,77,747,	0,3987,4892,5811,10100,10324,
13	64611246	64612633	mus_retrop52192.0	0	+	64611246	64612633	0	1	1387,	0,
13	67759682	67765130	mus_retrop52410.0	0	+	67759682	67765130	0	1	5448,	0,
13	67911137	67912184	mus_retrop52425.0	0	+	67911137	67912184	0	1	1047,	0,
13	74670838	74672023	mus_retrop52552.0	0	+	74670838	74672023	0	1	1185,	0,
13	75782345	75782678	mus_retrop52568.0	0	+	75782345	75782678	0	1	333,	0,
13	98228153	98228504	musiretrom10233.0	0	-	98228153	98228504	0	1	351,	0,
13	98530185	98530425	mus_retrom49232.1	0	-	98530185	98530425	0	1	240,	0,
13	98530276	98530523	mus_retrom49232.0	0	-	98530276	98530523	0	1	247,	0,
13	101421337	101425972	mus_retrop52885.0	0	+	101421337	101425972	0	3	63,93,984,	0,2808,3651,
13	101421606	101425967	mus_retrop52885.1	0	+	101421606	101425967	0	3	66,93,979,	0,2539,3382,
13	101421672	101425967	mus_retrop52885.2	0	+	101421672	101425967	0	3	69,93,979,	0,2473,3316,
14	12113514	12114380	mus_retrom66895.0	0	-	12113514	12114380	0	1	866,	0,
14	57409455	57424912	mus_retrop69399.0	0	-	57409455	57424912	0	7	3882,207,163,283,91,449,156,	0,5985,7049,8291,13530,13796,15301,
14	78860890	78861940	mus_retrop69578.0	0	+	78860890	78861940	0	1	1050,	0,
14	79103370	79104929	mus_retrop69581.0	0	+	79103370	79104929	0	2	1195,147,	0,1412,
14	94284064	94289886	mus_retrom68722.2	0	-	94284064	94289886	0	2	4043,547,	0,5275,
14	94284915	94286748	mus_retrom68722.1	0	-	94284915	94286748	0	1	1833,	0,
14	95818979	95821030	mus_retrop69629.0	0	+	95818979	95821030	0	1	2051,	0,
14	120418888	120431385	mus_retrom68920.0	0	-	120418888	120431385	0	4	3201,140,153,59,	0,7516,9355,12438,
14	120418888	120441657	mus_retrom68920.1	0	-	120418888	120441657	0	3	3201,140,156,	0,7516,22613,
14	120418888	120441657	mus_retrom68920.2	0	-	120418888	120441657	0	4	3201,140,153,156,	0,7516,9355,22613,
15	19384455	19385993	mus_retrom45850.0	0	-	19384455	19385993	0	1	1538,	0,
15	20594994	20596503	mus_retrom45852.1	0	-	20594994	20596503	0	1	1509,	0,
15	20595328	20596502	mus_retrom45852.0	0	-	20595328	20596502	0	1	1174,	0,
15	24652977	24654566	mus_retrom45856.0	0	-	24652977	24654566	0	1	1589,	0,
15	25769847	25770259	mus_retrom45861.0	0	-	25769847	25770259	0	1	412,	0,
15	25769847	25771339	mus_retrom45861.1	0	-	25769847	25771339	0	1	1492,	0,
15	40369109	40370133	mus_retrop49814.0	0	+	40369109	40370133	0	1	1024,	0,
15	51920892	51921268	mus_retrop49855.0	0	+	51920892	51921268	0	1	376,	0,
15	58704213	58709331	musiretrop08845.0	0	+	58704213	58709331	0	1	5118,	0,
15	62049174	62050989	mus_retrom46200.0	0	-	62049174	62050989	0	1	1815,	0,
15	63322372	63324462	musiretrom07320.0	0	-	63322372	63324462	0	1	2090,	0,
15	75794426	75799433	mus_retrom46277.0	0	-	75794426	75799433	0	2	888,2201,	0,2806,
15	75796070	75799433	mus_retrom46277.1	0	-	75796070	75799433	0	2	389,2201,	0,1162,
15	76353088	76358382	mus_retrom46295.0	0	-	76353088	76358382	0	1	5294,	0,
15	78383617	78385607	mus_retrom46431.0	0	-	78383617	78385607	0	1	1990,	0,
15	80058192	80060562	mus_retrom46464.0	0	-	80058192	80060562	0	1	2370,	0,
15	81237565	81238684	mus_retrom46474.0	0	-	81237565	81238684	0	1	1119,	0,
15	81810981	81811980	mus_retrop50179.0	0	+	81810981	81811980	0	1	999,	0,
15	90713138	90713681	mus_retrop50305.0	0	+	90713138	90713681	0	1	543,	0,
15	91648472	91654202	mus_retrop50323.0	0	+	91648472	91654202	0	1	5730,	0,
16	4229198	4231189	mus_retrop48457.1	0	+	4229198	4231189	0	1	1991,	0,
16	4229207	4231187	mus_retrop48457.0	0	+	4229207	4231187	0	2	580,1115,	0,865,
16	10798008	10803336	mus_retrop48516.0	0	+	10798008	10803336	0	1	5328,	0,
16	16274513	16276076	mus_retrop48572.0	0	+	16274513	16276076	0	1	1563,	0,
16	22053758	22055846	mus_retrop48690.2	0	+	22053758	22055846	0	2	244,352,	0,1736,
16	22053760	22054199	mus_retrop48690.0	0	+	22053760	22054199	0	1	439,	0,
16	22053773	22054856	mus_retrop48690.1	0	+	22053773	22054856	0	2	229,451,	0,632,
16	31376886	31379623	mus_retrom44511.0	0	-	31376886	31379623	0	1	2737,	0,
16	32408492	32409220	mus_retrop48834.2	0	+	32408492	32409220	0	1	728,	0,
16	37869041	37888928	mus_retrop48947.0	0	+	37869041	37888928	0	4	25,129,278,7589,	0,8093,9331,12298,
16	45204300	45216961	mus_retrop49028.0	0	+	45204300	45216961	0	3	1396,254,652,	0,8643,12009,
16	45204300	45216961	mus_retrop49028.1	0	+	45204300	45216961	0	4	686,503,254,652,	0,893,8643,12009,
16	48072377	48074571	mus_retrop49046.0	0	+	48072377	48074571	0	1	2194,	0,
16	53984071	53986074	mus_retrop49162.0	0	+	53984071	53986074	0	1	2003,	0,
16	87549296	87553640	mus_retrom45614.0	0	-	87549296	87553640	0	3	500,197,382,	0,1281,3962,
16	88682308	88682795	mus_retrom45624.0	0	-	88682308	88682795	0	1	487,	0,
17	5417344	5418697	mus_retrom42065.0	0	-	5417344	5418697	0	1	1353,	0,
17	6131695	6132604	mus_retrom42080.0	0	-	6131695	6132604	0	1	909,	0,
17	6492278	6493279	mus_retrom42086.0	0	-	6492278	6493279	0	1	1001,	0,
17	9859420	9862522	mus_retrom42194.0	0	-	9859420	9862522	0	1	3102,	0,
17	22104721	22104961	mus_retrom42415.0	0	-	22104721	22104961	0	1	240,	0,
17	33201060	33204978	mus_retrom42691.0	0	-	33201060	33204978	0	1	3918,	0,
17	33272585	33279043	mus_retrom42698.0	0	-	33272585	33279043	0	2	3182,2892,	0,3566,
17	35093447	35096171	mus_retrom42748.0	0	-	35093447	35096171	0	1	2724,	0,
17	35107162	35108963	mus_retrom42758.0	0	-	35107162	35108963	0	1	1801,	0,
17	35113917	35115697	mus_retrop47027.0	0	-	35113917	35115697	0	1	1780,	0,
17	37311858	37315118	mus_retrop47110.0	0	+	37311858	37315118	0	1	3260,	0,
17	40343998	40345528	mus_retrom43546.0	0	-	40343998	40345528	0	1	1530,	0,
17	47175329	47180012	mus_retrom43596.0	0	-	47175329	47180012	0	1	4683,	0,
17	65986930	65991516	mus_retrom43775.0	0	-	65986930	65991516	0	3	1439,146,200,	0,1964,4386,
17	79248356	79269872	mus_retrom43877.0	0	-	79248356	79269872	0	10	6245,57,102,132,181,120,123,51,35,46,	0,6326,7550,9484,14822,16285,17298,19740,20459,21470,
17	87343472	87347220	mus_retrom43922.0	0	-	87343472	87347220	0	2	937,37,	0,3711,
18	4198225	4198497	mus_retrom41029.0	0	-	4198225	4198497	0	1	272,	0,
18	9618795	9619436	mus_retrom41057.0	0	-	9618795	9619436	0	1	641,	0,
18	15991307	15991801	mus_retrop44762.0	0	+	15991307	15991801	0	1	494,	0,
18	15991308	15991794	mus_retrop44762.1	0	+	15991308	15991794	0	1	486,	0,
18	23375491	23376660	mus_retrop44823.0	0	+	23375491	23376660	0	1	1169,	0,
18	35696251	35696526	mus_retrop44896.1	0	+	35696251	35696526	0	1	275,	0,
18	35696290	35696525	mus_retrop44896.0	0	+	35696290	35696525	0	1	235,	0,
18	37080283	37081970	mus_retrop44918.0	0	+	37080283	37081970	0	1	1687,	0,
18	37797047	37798367	mus_retrom41298.0	0	-	37797047	37798367	0	1	1320,	0,
18	37800659	37803795	musiretrom03116.0	0	-	37800659	37803795	0	2	2527,197,	0,2939,
18	39933211	39935987	mus_retrop45643.0	0	+	39933211	39935987	0	1	2776,	0,
18	46624602	46625447	musiretrom03954.0	0	-	46624602	46625447	0	1	845,	0,
18	46757371	46769750	musiretrop03405.0	0	+	46757371	46769750	0	3	83,60,2593,	0,923,9786,
18	46757738	46769750	musiretrop03405.1	0	+	46757738	46769750	0	3	72,60,2593,	0,556,9419,
18	48206402	48208021	mus_retrop45787.0	0	+	48206402	48208021	0	1	1619,	0,
18	50727482	50728305	musiretrom03960.0	0	-	50727482	50728305	0	1	823,	0,
18	52491194	52492602	mus_retrop45861.0	0	+	52491194	52492602	0	1	1408,	0,
18	52853380	52855195	mus_retrop45870.0	0	+	52853380	52855195	0	1	1815,	0,
18	64447589	64451376	mus_retrop46022.1	0	+	64447589	64451376	0	3	695,133,210,	0,1026,3577,
18	64447643	64448441	mus_retrop46022.0	0	+	64447643	64448441	0	1	798,	0,
18	67365083	67366294	mus_retrop46040.0	0	+	67365083	67366294	0	1	1211,	0,
18	80403581	80409458	mus_retrop46229.0	0	+	80403581	80409458	0	4	59,190,69,1307,	0,311,3219,4570,
19	3205861	3206266	mus_retrop42196.0	0	+	3205861	3206266	0	1	405,	0,
19	18001593	18002073	mus_retrop44234.0	0	+	18001593	18002073	0	1	480,	0,
19	24550631	24551768	musiretrom03012.0	0	-	24550631	24551768	0	1	1137,	0,
19	29048835	29050365	mus_retrom40704.0	0	-	29048835	29050365	0	1	1530,	0,
19	29788913	29887940	mus_retrom40716.0	0	-	29788913	29887940	0	10	5183,188,116,90,80,1418,201,1457,1073,1884,	0,6162,8966,20692,29109,39176,71825,90858,95500,97143,
19	29882716	29887939	mus_retrom40716.1	0	-	29882716	29887939	0	1	5223,	0,
19	30078287	30080485	mus_retrop44349.0	0	+	30078287	30080485	0	1	2198,	0,
19	30613448	30614054	mus_retrom40738.0	0	-	30613448	30614054	0	1	606,	0,
19	40356669	40356947	mus_retrop44438.0	0	+	40356669	40356947	0	1	278,	0,
19	56827624	56835028	mus_retrom40956.0	0	-	56827624	56835028	0	1	7404,	0,
2	21989498	21990708	mus_retrop102426.0	0	+	21989498	21990708	0	1	1210,	0,
2	40411325	40412633	mus_retrop103919.0	0	+	40411325	40412633	0	1	1308,	0,
2	59936259	59936827	mus_retrom109003.0	0	-	59936259	59936827	0	1	568,	0,
2	70297088	70297614	mus_retrop104198.0	0	+	70297088	70297614	0	1	526,	0,
2	70456597	70458673	mus_retrom109068.2	0	-	70456597	70458673	0	2	1480,225,	0,1851,
2	78685295	78686182	mus_retrom109173.0	0	-	78685295	78686182	0	1	887,	0,
2	80132641	80135015	mus_retrop104327.0	0	+	80132641	80135015	0	1	2374,	0,
2	83193582	83193978	mus_retrom109227.0	0	-	83193582	83193978	0	1	396,	0,
2	87366369	87366688	mus_retrop106918.0	0	+	87366369	87366688	0	1	319,	0,
2	92401321	92402598	mus_retrop110694.0	0	+	92401321	92402598	0	1	1277,	0,
2	104554071	104557495	mus_retrom121805.1	0	-	104554071	104557495	0	2	888,1010,	0,2414,
2	104554073	104556291	mus_retrom121805.0	0	-	104554073	104556291	0	2	886,50,	0,2168,
2	119094980	119103704	musiretrom38462.0	0	-	119094980	119103704	0	4	1243,59,325,38,	0,1437,1671,8686,
2	121226968	121227134	mus_retrom122983.0	0	-	121226968	121227134	0	1	166,	0,
2	130707049	130707833	mus_retrop111983.0	0	+	130707049	130707833	0	1	784,	0,
2	148498394	148501757	mus_retrop112192.0	0	+	148498394	148501757	0	3	177,135,740,	0,1805,2623,
2	148498394	148501757	mus_retrop112192.1	0	+	148498394	148501757	0	2	177,740,	0,2623,
2	151284726	151285961	musiretrop37452.0	0	+	151284726	151285961	0	1	1235,	0,
2	152512934	152513303	mus_retrop112296.0	0	+	152512934	152513303	0	1	369,	0,
2	153117236	153159060	musiretrop37999.0	0	+	153117236	153159060	0	9	4,1468,102,123,119,114,106,179,3266,	0,24716,28774,29078,29283,31311,32036,38071,38558,
2	153141952	153159060	musiretrop37999.1	0	+	153141952	153159060	0	8	1468,102,123,119,114,106,179,3266,	0,4058,4362,4567,6595,7320,13355,13842,
2	153141952	153159060	musiretrop37999.2	0	+	153141952	153159060	0	8	1468,102,123,119,114,106,179,3266,	0,4058,4362,4567,6595,7320,13355,13842,
2	156819227	156832158	mus_retrom123369.0	0	-	156819227	156832158	0	10	2790,88,148,78,60,91,73,74,324,575,	0,3241,4115,5228,5644,7342,8191,9197,11676,12356,
2	156819231	156832796	mus_retrom123369.1	0	-	156819231	156832796	0	11	2786,88,148,78,60,91,73,74,324,26,86,	0,3237,4111,5224,5640,7338,8187,9193,11672,12352,13479,
2	166325618	166331086	mus_retrom123526.0	0	-	166325618	166331086	0	4	652,108,93,135,	0,2252,3208,5333,
2	166325618	166344182	mus_retrom123526.1	0	-	166325618	166344182	0	4	652,108,93,85,	0,2252,3208,18479,
2	170289154	170289501	mus_retrom123574.0	0	-	170289154	170289501	0	1	347,	0,
3	8214777	8216145	mus_retrop95424.0	0	+	8214777	8216145	0	1	1368,	0,
3	8214777	8223825	mus_retrop95424.1	0	+	8214777	8223825	0	2	747,297,	0,8751,
3	22424265	22424616	mus_retrop95696.0	0	+	22424265	22424616	0	1	351,	0,
3	33903938	33904219	mus_retrom100454.0	0	-	33903938	33904219	0	1	281,	0,
3	37633675	37634014	mus_retrop95814.0	0	+	37633675	37634014	0	1	339,	0,
3	40656859	40659194	mus_retrom100533.0	0	-	40656859	40659194	0	1	2335,	0,
3	40704152	40706420	mus_retrom100537.1	0	-	40704152	40706420	0	1	2268,	0,
3	40704160	40706418	mus_retrom100537.0	0	-	40704160	40706418	0	2	786,599,	0,1659,
3	48409712	48413011	mus_retrom100617.0	0	-	48409712	48413011	0	2	129,392,	0,2907,
3	59235619	59237134	mus_retrop95957.0	0	+	59235619	59237134	0	1	1515,	0,
3	59571601	59572121	mus_retrop95965.0	0	+	59571601	59572121	0	1	520,	0,
3	65312468	65333322	mus_retrom100745.0	0	-	65312468	65333322	0	4	670,48,237,164,	0,8092,8601,20690,
3	65417517	65419983	mus_retrop96033.0	0	+	65417517	65419983	0	1	2466,	0,
3	85718642	85718980	mus_retrop96190.0	0	+	85718642	85718980	0	1	338,	0,
3	88233078	88233345	mus_retrop96242.0	0	+	88233078	88233345	0	1	267,	0,
3	88380343	88380974	mus_retrom100950.0	0	-	88380343	88380974	0	1	631,	0,
3	95214305	95214885	mus_retrom101392.0	0	-	95214305	95214885	0	1	580,	0,
3	115641927	115710282	musiretrop33087.0	0	-	115641927	115710282	0	11	7702,150,91,136,51,150,127,88,114,102,230,	0,15042,17861,39634,42752,45815,51002,51717,53916,67824,68125,
3	124023985	124025822	mus_retrop96971.0	0	+	124023985	124025822	0	1	1837,	0,
3	135146399	135147107	mus_retrop97067.0	0	+	135146399	135147107	0	1	708,	0,
3	140873314	140874765	mus_retrom102170.0	0	-	140873314	140874765	0	1	1451,	0,
3	142193320	142213100	mus_retrop97126.0	0	+	142193320	142213100	0	11	83,196,128,110,197,246,281,213,103,194,3817,	0,4160,5940,7655,8365,10999,12492,13565,15093,15505,15963,
3	144086897	144233162	mus_retrom102194.0	0	-	144086897	144233162	0	7	10781,158,98,139,86,239,465,	0,11528,13661,23336,30018,41113,145800,
4	3185653	3186325	musiretrop31812.0	0	+	3185653	3186325	0	1	672,	0,
4	4454948	4456826	mus_retrom97891.0	0	-	4454948	4456826	0	1	1878,	0,
4	4454949	4456826	mus_retrom97891.1	0	-	4454949	4456826	0	2	949,612,	0,1265,
4	9843519	9844538	mus_retrom97984.0	0	-	9843519	9844538	0	1	1019,	0,
4	12058559	12060408	mus_retrom98017.0	0	-	12058559	12060408	0	1	1849,	0,
4	25468930	25469728	mus_retrom98064.0	0	-	25468930	25469728	0	1	798,	0,
4	33051750	33051992	mus_retrop93339.0	0	+	33051750	33051992	0	1	242,	0,
4	34336203	34349588	mus_retrom98121.0	0	-	34336203	34349588	0	2	916,72,	0,13313,
4	34336208	34429998	mus_retrom98121.1	0	-	34336208	34429998	0	4	911,146,107,346,	0,22661,93100,93444,
4	34888164	34888553	mus_retrom98128.0	0	-	34888164	34888553	0	1	389,	0,
4	37917484	37919452	musiretrop30598.0	0	+	37917484	37919452	0	1	1968,	0,
4	37917484	37920606	musiretrop30598.2	0	+	37917484	37920606	0	2	1956,119,	0,3003,
4	37917484	37920668	musiretrop30598.1	0	+	37917484	37920668	0	2	1956,181,	0,3003,
4	39397362	39398800	mus_retrop93365.0	0	+	39397362	39398800	0	2	204,1010,	0,428,
4	45811955	45817445	mus_retrop93743.0	0	+	45811955	45817445	0	2	86,2119,	0,3371,
4	49691645	49694869	mus_retrom98541.0	0	-	49691645	49694869	0	2	2414,558,	0,2666,
4	72511418	72513642	mus_retrom98840.0	0	-	72511418	72513642	0	1	2224,	0,
4	82840263	82840721	mus_retrop94036.0	0	+	82840263	82840721	0	1	458,	0,
4	86221592	86223164	musiretrop30459.0	0	+	86221592	86223164	0	1	1572,	0,
4	97187991	97188925	musiretrom30803.0	0	-	97187991	97188925	0	1	934,	0,
4	99096931	99097261	mus_retrom99232.0	0	-	99096931	99097261	0	1	330,	0,
4	122793515	122795227	mus_retrop94954.0	0	+	122793515	122795227	0	1	1712,	0,
4	122999126	123000849	musiretrom31734.0	0	-	122999126	123000849	0	1	1723,	0,
4	147195684	147222687	mus_retrom100047.0	0	-	147195684	147222687	0	4	5371,61,127,301,	0,6834,7094,26702,
4	154040567	154041962	mus_retrom100099.0	0	-	154040567	154041962	0	1	1395,	0,
4	154040572	154041798	mus_retrom100099.1	0	-	154040572	154041798	0	1	1226,	0,
5	5781563	5783595	mus_retrom96093.0	0	-	5781563	5783595	0	1	2032,	0,
5	7179641	7180639	mus_retrop91705.0	0	+	7179641	7180639	0	1	998,	0,
5	24151279	24154675	mus_retrop91832.0	0	+	24151279	24154675	0	2	74,1362,	0,2034,
5	24151279	24154675	mus_retrop91832.1	0	+	24151279	24154675	0	2	74,1403,	0,1993,
5	33361625	33370603	mus_retrop91945.0	0	+	33361625	33370603	0	2	178,1413,	0,7565,
5	38966022	38967232	mus_retrom96493.0	0	+	38966022	38967232	0	1	1210,	0,
5	39727980	39730108	mus_retrom96504.0	0	-	39727980	39730108	0	2	1203,41,	0,2087,
5	43354323	43356554	musiretrom28650.0	0	-	43354323	43356554	0	1	2231,	0,
5	62198067	62202704	mus_retrop92122.0	0	+	62198067	62202704	0	2	130,2627,	0,2010,
5	62200064	62202703	mus_retrop92122.1	0	+	62200064	62202703	0	2	2271,189,	0,2450,
5	71834145	71939453	musiretrom28926.0	0	-	71834145	71939453	0	3	363,63,42,	0,60544,105266,
5	73771603	73783957	mus_retrop92162.0	0	+	73771603	73783957	0	2	488,2104,	0,10250,
5	87798844	87799260	mus_retrom96741.0	0	-	87798844	87799260	0	1	416,	0,
5	97811261	97821358	mus_retrom96889.0	0	-	97811261	97821358	0	2	2627,712,	0,9385,
5	97884205	97885989	mus_retrom96895.0	0	-	97884205	97885989	0	1	1784,	0,
5	104937402	104980159	mus_retrop92527.1	0	+	104937402	104980159	0	8	188,5302,32,38,155,148,97,255,	0,9039,15733,15875,17434,30442,32782,42502,
5	104937405	104983206	mus_retrop92527.0	0	+	104937405	104983206	0	8	185,5302,32,167,155,148,97,3302,	0,9036,15730,15872,17431,30439,32779,42499,
5	107860571	107863476	mus_retrop92564.0	0	+	107860571	107863476	0	3	426,1236,449,	0,1135,2456,
5	107860571	107863476	mus_retrop92564.1	0	+	107860571	107863476	0	2	427,1770,	0,1135,
5	108259200	108260734	mus_retrop92578.0	0	+	108259200	108260734	0	1	1534,	0,
5	109957262	109959150	mus_retrom97091.0	0	-	109957262	109959150	0	1	1888,	0,
5	109957290	109975405	mus_retrom97091.1	0	-	109957290	109975405	0	2	855,69,	0,18046,
5	115553187	115553534	mus_retrom97130.1	0	-	115553187	115553534	0	1	347,	0,
5	115553224	115553534	mus_retrom97130.0	0	-	115553224	115553534	0	1	310,	0,
5	126327386	126330265	musiretrom28553.0	0	-	126327386	126330265	0	2	1756,130,	0,2749,
5	135421145	135422781	mus_retrom97471.0	0	-	135421145	135422781	0	1	1636,	0,
5	136384289	136410447	mus_retrom97507.0	0	-	136384289	136410447	0	2	3232,255,	0,25903,
5	138805927	138806775	mus_retrom97605.0	0	-	138805927	138806775	0	1	848,	0,
5	143001844	143005950	mus_retrom97643.0	0	-	143001844	143005950	0	1	4106,	0,
5	147889109	147890620	musiretrop30372.0	0	+	147889109	147890620	0	2	160,510,	0,1001,
6	8545737	8546987	mus_retrom73131.0	0	-	8545737	8546987	0	1	1250,	0,
6	23598882	23600247	musiretrom22766.0	0	-	23598882	23600247	0	1	1365,	0,
6	34426338	34455118	mus_retrop74711.0	0	+	34426338	34455118	0	3	84,661,848,	0,10951,27932,
6	37491311	37491931	mus_retrop74746.0	0	+	37491311	37491931	0	1	620,	0,
6	39792617	39794359	mus_retrom73305.0	0	-	39792617	39794359	0	1	1742,	0,
6	65902606	65903986	mus_retrop76052.0	0	+	65902606	65903986	0	1	1380,	0,
6	67155684	67156067	mus_retrop76105.0	0	+	67155684	67156067	0	1	383,	0,
6	67484123	67485799	musiretrom22866.0	0	-	67484123	67485799	0	1	1676,	0,
6	73418580	73419625	mus_retrom79426.0	0	-	73418580	73419625	0	1	1045,	0,
6	85026304	85030417	mus_retrop78757.1	0	+	85026304	85030417	0	2	421,98,	0,4015,
6	85026305	85026722	mus_retrop78757.0	0	+	85026305	85026722	0	1	417,	0,
6	86474507	86475994	mus_retrom79661.0	0	-	86474507	86475994	0	1	1487,	0,
6	88172595	88173148	mus_retrop78825.0	0	-	88172595	88173148	0	1	553,	0,
6	90855712	90856483	mus_retrop78965.0	0	+	90855712	90856483	0	2	166,603,	0,168,
6	92515205	92515824	mus_retrom79842.0	0	-	92515205	92515824	0	1	619,	0,
6	96114573	96116209	mus_retrom79905.0	0	-	96114573	96116209	0	1	1636,	0,
6	116145457	116145704	mus_retrom80040.0	0	-	116145457	116145704	0	1	247,	0,
6	117856829	117875571	musiretrop24940.0	0	+	117856829	117875571	0	4	28,129,61,1846,	0,10658,12287,16896,
6	117857147	117875571	musiretrop24940.1	0	+	117857147	117875571	0	4	79,129,61,1846,	0,10340,11969,16578,
6	117947116	117948026	mus_retrop79355.0	0	+	117947116	117948026	0	1	910,	0,
6	127232118	127232421	mus_retrom80165.0	0	-	127232118	127232421	0	1	303,	0,
6	128152725	128152906	musiretrom22353.0	0	-	128152725	128152906	0	1	181,	0,
6	128422983	128424158	mus_retrop79467.0	0	+	128422983	128424158	0	1	1175,	0,
6	128422983	128424158	mus_retrop79467.0	0	+	128422983	128424158	0	1	1175,	0,
6	133881896	133882344	mus_retrom80307.0	0	-	133881896	133882344	0	1	448,	0,
6	135259177	135260354	mus_retrom80325.0	0	-	135259177	135260354	0	1	1177,	0,
6	135299495	135299694	mus_retrom80331.0	0	-	135299495	135299694	0	1	199,	0,
6	138605639	138607164	mus_retrom80362.0	0	-	138605639	138607164	0	1	1525,	0,
6	145214857	145215297	mus_retrop79606.0	0	+	145214857	145215297	0	1	440,	0,
6	145336127	145340716	mus_retrop79610.0	0	+	145336127	145340716	0	2	290,772,	0,3817,
6	148303185	148304109	mus_retrop79653.0	0	+	148303185	148304109	0	1	924,	0,
7	3181345	3181882	mus_retrop79686.0	0	+	3181345	3181882	0	1	537,	0,
7	5076579	5077538	mus_retrom80482.0	0	-	5076579	5077538	0	1	959,	0,
7	11241655	11242300	mus_retrom81987.1	0	-	11241655	11242300	0	1	645,	0,
7	11241912	11242299	mus_retrom81987.0	0	-	11241912	11242299	0	1	387,	0,
7	25118097	25118977	mus_retrom90513.0	0	-	25118097	25118977	0	1	880,	0,
7	31494907	31495309	mus_retrop85572.0	0	+	31494907	31495309	0	1	402,	0,
7	37019501	37020240	mus_retrop86720.0	0	+	37019501	37020240	0	1	739,	0,
7	48921742	48923499	mus_retrom90885.0	0	-	48921742	48923499	0	1	1757,	0,
7	49380638	49381552	mus_retrom90946.0	0	-	49380638	49381552	0	1	914,	0,
7	57854570	57855833	mus_retrop86910.0	0	+	57854570	57855833	0	1	1263,	0,
7	66091853	66092938	mus_retrom91238.0	0	-	66091853	66092938	0	1	1085,	0,
7	75763311	75764881	mus_retrop87027.0	0	+	75763311	75764881	0	1	1570,	0,
7	75763311	75764881	mus_retrop87027.1	0	+	75763311	75764881	0	2	308,998,	0,572,
7	88367444	88367689	mus_retrom91497.0	0	-	88367444	88367689	0	1	245,	0,
7	96756398	96757066	mus_retrop87352.0	0	+	96756398	96757066	0	1	668,	0,
7	109796171	109796676	mus_retrom91966.1	0	-	109796171	109796676	0	1	505,	0,
7	111969742	111970761	mus_retrop89328.0	0	+	111969742	111970761	0	1	1019,	0,
7	114352610	114354427	mus_retrop89795.0	0	+	114352610	114354427	0	1	1817,	0,
7	121352220	121352496	mus_retrom95429.0	0	-	121352220	121352496	0	1	276,	0,
7	138757172	138758704	mus_retrom95856.0	0	-	138757172	138758704	0	1	1532,	0,
7	148363948	148380128	mus_retrom96027.0	0	-	148363948	148380128	0	9	478,123,98,477,126,160,179,152,390,	0,735,1830,12668,13292,14081,14392,14780,15790,
7	148363948	148380128	mus_retrom96027.1	0	-	148363948	148380128	0	8	478,123,98,750,160,179,152,390,	0,735,1830,12668,14081,14392,14780,15790,
8	3583806	3584164	mus_retrop73113.0	0	-	3583806	3584164	0	1	358,	0,
8	3583806	3584164	mus_retrop73113.0	0	-	3583806	3584164	0	1	358,	0,
8	3583807	3584060	mus_retrop73113.1	0	-	3583807	3584060	0	1	253,	0,
8	3583807	3584060	mus_retrop73113.1	0	-	3583807	3584060	0	1	253,	0,
8	3583807	3584060	mus_retrop73113.2	0	-	3583807	3584060	0	1	253,	0,
8	3583807	3584060	mus_retrop73113.2	0	-	3583807	3584060	0	1	253,	0,
8	3994629	3997435	musiretrop22468.0	0	+	3994629	3997435	0	1	2806,	0,
8	13746496	13747415	mus_retrom71748.0	0	-	13746496	13747415	0	1	919,	0,
8	13835246	13838477	mus_retrom71756.0	0	-	13835246	13838477	0	1	3231,	0,
8	29193261	29196035	mus_retrom71816.0	0	-	29193261	29196035	0	1	2774,	0,
8	34594687	34595587	mus_retrop73440.0	0	+	34594687	34595587	0	1	900,	0,
8	41939519	41940643	mus_retrom72028.0	0	-	41939519	41940643	0	1	1124,	0,
8	41940307	41941719	mus_retrop73537.0	0	+	41940307	41941719	0	1	1412,	0,
8	43332268	43332934	mus_retrop73543.0	0	+	43332268	43332934	0	1	666,	0,
8	59998705	59999694	mus_retrom72264.0	0	-	59998705	59999694	0	1	989,	0,
8	69035640	69043082	mus_retrop73764.0	0	+	69035640	69043082	0	2	1959,4391,	0,3051,
8	72534473	72534772	mus_retrom72362.0	0	-	72534473	72534772	0	1	299,	0,
8	74804027	74809108	mus_retrom72410.0	0	-	74804027	74809108	0	3	648,802,416,	0,3226,4665,
8	74806536	74809112	mus_retrom72410.1	0	-	74806536	74809112	0	2	1519,420,	0,2156,
8	81029208	81032757	mus_retrom72520.0	0	-	81029208	81032757	0	2	1554,60,	0,3489,
8	98157318	98168827	mus_retrop74329.0	0	+	98157318	98168827	0	3	365,234,1821,	0,4391,9688,
8	98166959	98168827	mus_retrop74329.1	0	+	98166959	98168827	0	1	1868,	0,
8	99952061	99953098	mus_retrom72807.0	0	-	99952061	99953098	0	1	1037,	0,
8	100088231	100090969	mus_retrom72849.0	0	-	100088231	100090969	0	1	2738,	0,
8	103159988	103163389	mus_retrop74359.1	0	+	103159988	103163389	0	1	3401,	0,
8	109096854	109097214	mus_retrom72920.0	0	-	109096854	109097214	0	1	360,	0,
8	112968393	112971416	mus_retrop74421.0	0	+	112968393	112971416	0	2	97,1163,	0,1860,
8	120185312	120195591	musiretrom21215.0	0	-	120185312	120195591	0	3	2420,94,483,	0,3574,9796,
8	120185314	120197559	musiretrom21215.1	0	-	120185314	120197559	0	4	2418,94,135,60,	0,3572,9794,12185,
8	120185314	120197559	musiretrom21215.2	0	-	120185314	120197559	0	3	2418,94,60,	0,3572,12185,
8	127289284	127289854	mus_retrop74490.0	0	+	127289284	127289854	0	1	570,	0,
9	6265051	6266532	musiretrom15167.1	0	-	6265051	6266532	0	1	1481,	0,
9	6265187	6266528	musiretrom15167.0	0	-	6265187	6266528	0	1	1341,	0,
9	19732348	19732728	mus_retrom62633.0	0	-	19732348	19732728	0	1	380,	0,
9	21338115	21338465	mus_retrom62921.0	0	-	21338115	21338465	0	1	350,	0,
9	35089119	35089307	mus_retrom63020.0	0	-	35089119	35089307	0	1	188,	0,
9	37504200	37504568	mus_retrop59824.0	0	+	37504200	37504568	0	1	368,	0,
9	39857969	39864449	mus_retrop65595.0	0	+	39857969	39864449	0	1	6480,	0,
9	43023688	43026145	mus_retrop65646.0	0	+	43023688	43026145	0	1	2457,	0,
9	51808933	51856946	mus_retrom65810.0	0	-	51808933	51856946	0	3	2498,119,217,	0,20182,47796,
9	55875360	55878529	mus_retrop65763.0	0	+	55875360	55878529	0	1	3169,	0,
9	56285576	56286021	mus_retrop65764.0	0	+	56285576	56286021	0	1	445,	0,
9	57331735	57332383	mus_retrop65784.0	0	+	57331735	57332383	0	1	648,	0,
9	58993692	58993912	mus_retrom65903.0	0	-	58993692	58993912	0	1	220,	0,
9	62689425	62689755	mus_retrom65939.0	0	-	62689425	62689755	0	1	330,	0,
9	66653159	66653648	mus_retrom65981.0	0	-	66653159	66653648	0	1	489,	0,
9	67595960	67596749	mus_retrom66136.0	0	-	67595960	67596749	0	1	789,	0,
9	71446710	71448333	mus_retrom66171.0	0	-	71446710	71448333	0	1	1623,	0,
9	75541566	75541861	mus_retrom66280.0	0	-	75541566	75541861	0	1	295,	0,
9	107194722	107195605	mus_retrom66621.0	0	-	107194722	107195605	0	1	883,	0,
9	108062447	108063483	mus_retrop66231.0	0	+	108062447	108063483	0	1	1036,	0,
9	109731867	109734268	mus_retrom66654.0	0	-	109731867	109734268	0	1	2401,	0,
9	109731867	109735186	mus_retrom66654.1	0	-	109731867	109735186	0	2	2076,460,	0,2859,
9	122850761	122851832	mus_retrop66346.0	0	+	122850761	122851832	0	1	1071,	0,
9	123598560	123599371	musiretrom15952.0	0	-	123598560	123599371	0	1	811,	0,
NT_161902	202741	203590	musiretrom01640.0	0	-	202741	203590	0	1	849,	0,
NT_161902	397624	399546	musiretrom01651.0	0	-	397624	399546	0	1	1922,	0,
NT_161937	825629	826001	musiretrop01978.0	0	+	825629	826001	0	1	372,	0,
NT_161937	982723	983103	musiretrop01980.0	0	+	982723	983103	0	1	380,	0,
NT_161937	1398588	1399018	musiretrop01983.0	0	+	1398588	1399018	0	1	430,	0,
X	5624839	5631846	mus_retrop98169.0	0	+	5624839	5631846	0	2	683,1702,	0,5305,
X	5745875	5750113	mus_retrom103412.1	0	-	5745875	5750113	0	2	1039,654,	0,3584,
X	5745877	5750113	mus_retrom103412.0	0	-	5745877	5750113	0	3	482,83,654,	0,954,3582,
X	5748985	5750113	mus_retrom103412.2	0	-	5748985	5750113	0	1	1128,	0,
X	7615937	7616132	musiretrom34407.0	0	-	7615937	7616132	0	1	195,	0,
X	12229053	12229930	mus_retrop98507.0	0	+	12229053	12229930	0	1	877,	0,
X	12514054	12515614	musiretrop34327.0	0	+	12514054	12515614	0	1	1560,	0,
X	14687750	14688518	mus_retrom103568.0	0	-	14687750	14688518	0	1	768,	0,
X	22038792	22039489	mus_retrop98666.0	0	+	22038792	22039489	0	1	697,	0,
X	23459673	23484676	mus_retrop98672.0	0	+	23459673	23484676	0	3	92,63,1286,	0,10176,23717,
X	23534779	23536059	mus_retrom103643.1	0	-	23534779	23536059	0	1	1280,	0,
X	23534779	23569004	mus_retrom103643.0	0	-	23534779	23569004	0	2	1283,24,	0,34201,
X	23534779	23572789	mus_retrom103643.2	0	-	23534779	23572789	0	2	1283,20,	0,37990,
X	23534779	23597387	mus_retrom103643.3	0	-	23534779	23597387	0	2	1283,28,	0,62580,
X	23534779	23614775	mus_retrom103643.4	0	-	23534779	23614775	0	2	1283,62,	0,79934,
X	33291574	33342474	mus_retrop99884.0	0	+	33291574	33342474	0	3	101,114,1285,	0,2836,49615,
X	33291574	33342474	mus_retrop99884.1	0	+	33291574	33342474	0	4	101,114,88,1285,	0,2836,15315,49615,
X	42139752	42142015	mus_retrom105261.0	0	-	42139752	42142015	0	2	1718,448,	0,1815,
X	42139752	42143349	mus_retrom105261.1	0	-	42139752	42143349	0	2	1718,1760,	0,1837,
X	53701141	53701502	mus_retrop100234.0	0	+	53701141	53701502	0	1	361,	0,
X	53701141	53701502	mus_retrop100234.0	0	+	53701141	53701502	0	1	361,	0,
X	57298226	57299531	mus_retrom105504.0	0	-	57298226	57299531	0	1	1305,	0,
X	57801194	57802346	mus_retrop100263.0	0	+	57801194	57802346	0	1	1152,	0,
X	71506420	71506883	mus_retrop100454.0	0	+	71506420	71506883	0	1	463,	0,
X	75900922	75902059	mus_retrom106218.0	0	-	75900922	75902059	0	1	1137,	0,
X	76876531	76876859	musiretrom36000.0	0	-	76876531	76876859	0	1	328,	0,
X	77147724	77149047	mus_retrom106245.0	0	-	77147724	77149047	0	1	1323,	0,
X	86649292	86651966	mus_retrom106418.0	0	-	86649292	86651966	0	1	2674,	0,
X	86898361	87000806	mus_retrop100839.0	0	+	86898361	87000806	0	2	54,3024,	0,99421,
X	86997603	87000806	mus_retrop100839.1	0	+	86997603	87000806	0	2	39,3024,	0,179,
X	86997603	87000806	mus_retrop100839.2	0	+	86997603	87000806	0	2	48,3024,	0,179,
X	87662113	87664961	mus_retrom106435.0	0	-	87662113	87664961	0	2	2685,27,	0,2821,
X	91881426	91888546	mus_retrop100895.2	0	+	91881426	91888546	0	3	2293,663,448,	0,4838,6672,
X	91881428	91883847	mus_retrop100895.0	0	+	91881428	91883847	0	1	2419,	0,
X	91881428	91884596	mus_retrop100895.1	0	+	91881428	91884596	0	2	2291,165,	0,3003,
X	97532620	97534265	mus_retrop100929.0	0	+	97532620	97534265	0	1	1645,	0,
X	97624104	97625509	mus_retrop100933.0	0	+	97624104	97625509	0	1	1405,	0,
X	98963911	98964256	mus_retrop100947.1	0	+	98963911	98964256	0	1	345,	0,
X	98963975	98964254	mus_retrop100947.0	0	+	98963975	98964254	0	1	279,	0,
X	100724954	100725995	mus_retrop101009.0	0	+	100724954	100725995	0	1	1041,	0,
X	100825971	100826964	mus_retrop101020.0	0	+	100825971	100826964	0	1	993,	0,
X	102920418	102920805	mus_retrom106866.0	0	-	102920418	102920805	0	1	387,	0,
X	112018590	112019543	mus_retrop101159.0	0	+	112018590	112019543	0	2	221,545,	0,408,
X	112021173	112022101	mus_retrop101172.0	0	+	112021173	112022101	0	2	210,532,	0,396,
X	117228476	117229440	mus_retrop101198.0	0	+	117228476	117229440	0	1	964,	0,
X	123347016	123350365	musiretrom35383.0	0	-	123347016	123350365	0	1	3349,	0,
X	124796274	124797555	mus_retrop101532.0	0	+	124796274	124797555	0	1	1281,	0,
X	124909948	124911769	musiretrop34975.0	0	+	124909948	124911769	0	1	1821,	0,
X	131135785	131141558	mus_retrop101570.0	0	+	131135785	131141558	0	3	87,71,2165,	0,1445,3608,
X	131135785	131141559	mus_retrop101570.1	0	+	131135785	131141559	0	4	87,71,45,2166,	0,1445,1671,3608,
X	132528374	132529877	musiretrop34558.0	0	+	132528374	132529877	0	1	1503,	0,
X	132567926	132569368	musiretrop34559.0	0	+	132567926	132569368	0	1	1442,	0,
X	133267503	133275799	musiretrom36849.1	0	-	133267503	133275799	0	4	1537,77,90,51,	0,2581,6840,8245,
X	133267504	133275799	musiretrom36849.0	0	-	133267504	133275799	0	3	1536,90,51,	0,6839,8244,
X	133392692	133403098	mus_retrom107434.0	0	-	133392692	133403098	0	3	3538,72,167,	0,4626,10239,
X	133634040	133635328	mus_retrop101671.0	0	+	133634040	133635328	0	1	1288,	0,
X	148999438	149000516	mus_retrop101951.0	0	+	148999438	149000516	0	1	1078,	0,
X	149932746	149936072	mus_retrop101970.0	0	+	149932746	149936072	0	1	3326,	0,
X	150266640	150268763	mus_retrop102165.0	0	+	150266640	150268763	0	2	232,1030,	0,1093,
X	150266640	150268766	mus_retrop102165.1	0	+	150266640	150268766	0	3	232,114,1033,	0,337,1093,
X	150266640	150268766	mus_retrop102165.2	0	+	150266640	150268766	0	2	451,1033,	0,1093,
X	154088572	154089292	mus_retrom108019.0	0	-	154088572	154089292	0	1	720,	0,
X	160198103	160199239	mus_retrom108053.0	0	-	160198103	160199239	0	1	1136,	0,
X	162919781	162921854	musiretrom35009.0	0	-	162919781	162921854	0	1	2073,	0,
X	166214153	166217537	mus_retrom108094.0	0	-	166214153	166217537	0	3	1177,91,88,	0,1872,3296,
Y	605007	605395	mus_retrom38162.0	0	-	605007	605395	0	1	388,	0,

## Sheet: Rat
# Supplemental Table S11: Retrocopy transcripts in rat (BED12 format)
Chromosome	Start	End	Transcript_ID	Score (not defined)	Strand	Thick Start (not defined)	Thick End (not defined)	Item_RGB (not defined)	Exon_count	Exon_sizes	Exon_starts
1	5844281	5845307	rno_retrom06586.0	0	-	5844281	5845307	0	1	1026	0,
1	7660727	7661579	rnoiretrop45877.0	0	-	7660727	7661579	0	1	852	0,
1	14777387	14779200	rnoiretrop45975.0	0	+	14777387	14779200	0	1	1813	0,
1	19563520	19564128	rnoiretrop46035.0	0	+	19563520	19564128	0	1	608	0,
1	29721376	29721886	rno_retrom06644.0	0	-	29721376	29721886	0	1	510	0,
1	33797248	33798864	rno_retrom06651.0	0	-	33797248	33798864	0	1	1616	0,
1	40399202	40400483	rno_retrom06664.0	0	-	40399202	40400483	0	1	1281	0,
1	42093148	42094461	rnoiretrop46370.0	0	+	42093148	42094461	0	1	1313	0,
1	45590450	45593527	rnoiretrop46431.0	0	+	45590450	45593527	0	1	3077	0,
1	47859682	47860585	rno_retrom06679.0	0	-	47859682	47860585	0	1	903	0,
1	51208888	51210097	rno_retrom06702.0	0	-	51208888	51210097	0	1	1209	0,
1	52006208	52007007	rno_retrom06740.0	0	-	52006208	52007007	0	1	799	0,
1	52242404	52243354	rno_retrom06751.0	0	-	52242404	52243354	0	1	950	0,
1	52753294	52753973	rno_retrom06765.0	0	-	52753294	52753973	0	1	679	0,
1	63235099	63236490	rno_retrom06819.0	0	-	63235099	63236490	0	1	1391	0,
1	67457066	67457976	rnoiretrop46976.0	0	+	67457066	67457976	0	1	910	0,
1	79369454	79370865	rnoiretrop47415.1	0	+	79369454	79370865	0	1	1411	0,
1	79575676	79576488	rno_retrom06929.0	0	-	79575676	79576488	0	1	812	0,
1	82119640	82120352	rnoiretrom49771.0	0	-	82119640	82120352	0	1	712	0,
1	82854673	82854927	rnoiretrop47573.0	0	+	82854673	82854927	0	1	254	0,
1	86251215	86253186	rnoiretrom49964.0	0	-	86251215	86253186	0	1	1971	0,
1	91097583	91097770	rnoiretrop47746.0	0	+	91097583	91097770	0	1	187	0,
1	94846255	94856474	rno_retrom07000.0	0	-	94846255	94856474	0	2	516,428,	0,9791,
1	100482096	100483496	rnoiretrop47973.0	0	+	100482096	100483496	0	1	1400	0,
1	111604753	111678109	rno_retrom07044.1	0	-	111604753	111678109	0	4	2588,38,62,95,	0,5803,62646,73261,
1	116672944	116675222	rnoiretrom50451.0	0	-	116672944	116675222	0	1	2278	0,
1	159723114	159735530	rno_retrom07159.0	0	-	159723114	159735530	0	2	2098,24,	0,12392,
1	163663921	163664539	rno_retrom07256.0	0	-	163663921	163664539	0	1	618	0,
1	175179759	175180135	rno_retrom07318.0	0	-	175179759	175180135	0	1	376	0,
1	179450947	179451540	rnoiretrom52607.0	0	-	179450947	179451540	0	1	593	0,
1	185499761	185500234	rnoiretrop50268.0	0	+	185499761	185500234	0	1	473	0,
1	200970043	200977573	rno_retrom07386.0	0	-	200970043	200977573	0	2	4020,235,	0,7295,
1	207421699	207426931	rnoiretrop50913.0	0	+	207421699	207426931	0	2	475,467,	0,4765,
1	208146721	208147635	rnoiretrom53288.0	0	-	208146721	208147635	0	1	914	0,
1	208186670	208186936	rnoiretrop50975.0	0	+	208186670	208186936	0	1	266	0,
1	208269345	208269599	rno_retrom07420.0	0	-	208269345	208269599	0	1	254	0,
1	226996497	227001584	rnoiretrop51747.0	0	+	226996497	227001584	0	2	48,1196,	0,3891,
1	227442545	227443292	rno_retrom07502.0	0	-	227442545	227443292	0	1	747	0,
1	227892032	227893026	rnoiretrom53961.0	0	-	227892032	227893026	0	1	994	0,
1	233518489	233523073	rno_retrom07517.0	0	-	233518489	233523073	0	1	4584	0,
1	233743652	233745907	rnoiretrop51865.0	0	+	233743652	233745907	0	1	2255	0,
1	252329499	252340919	rnoiretrop52160.0	0	+	252329499	252340919	0	3	1043,125,2020,	0,7240,9400,
1	258942236	258942661	rnoiretrop52208.0	0	+	258942236	258942661	0	1	425	0,
10	449500	450827	rno_retrop01658.0	0	+	449500	450827	0	1	1327	0,
10	1779757	1781039	rno_retrom01720.0	0	-	1779757	1781039	0	1	1282	0,
10	7921809	7922687	rno_retrop01676.0	0	+	7921809	7922687	0	1	878	0,
10	13073280	13073449	rno_retrom01769.0	0	-	13073280	13073449	0	1	169	0,
10	19773341	19800130	rno_retrom01800.0	0	-	19773341	19800130	0	3	6085,193,3986,	0,7836,22803,
10	20709131	20711020	rnoiretrom12303.0	0	-	20709131	20711020	0	1	1889	0,
10	37197779	37201959	rno_retrom01825.1	0	-	37197779	37201959	0	2	676,114,	0,4066,
10	37197791	37201781	rno_retrom01825.0	0	-	37197791	37201781	0	2	664,134,	0,3856,
10	37869196	37869741	rno_retrom01829.0	0	-	37869196	37869741	0	1	545	0,
10	48849144	48858527	rno_retrop01833.1	0	+	48849144	48858527	0	2	1582,6321,	0,3062,
10	48852206	48858507	rno_retrop01833.0	0	+	48852206	48858507	0	1	6301	0,
10	55392046	55392932	rno_retrom01895.0	0	-	55392046	55392932	0	1	886	0,
10	55660526	55662086	rno_retrom01897.0	0	-	55660526	55662086	0	1	1560	0,
10	55833070	55833355	rno_retrop01848.0	0	+	55833070	55833355	0	1	285	0,
10	55913540	55914377	rnoiretrom13116.0	0	-	55913540	55914377	0	1	837	0,
10	55913540	55915056	rnoiretrom13116.1	0	-	55913540	55915056	0	2	821,570,	0,946,
10	63571324	63575995	rnoiretrop13633.1	0	+	63571324	63575995	0	3	98,1325,31,	0,549,4640,
10	63571326	63575995	rnoiretrop13633.0	0	+	63571326	63575995	0	3	96,352,31,	0,547,4638,
10	64864954	64866061	rnoiretrom13632.0	0	-	64864954	64866061	0	1	1107	0,
10	66106883	66107409	rnoiretrom13669.0	0	-	66106883	66107409	0	1	526	0,
10	68349517	68353029	rno_retrop01910.0	0	+	68349517	68353029	0	1	3512	0,
10	69783156	69784751	rnoiretrom13712.0	0	-	69783156	69784751	0	1	1595	0,
10	77427544	77428738	rno_retrom01987.0	0	-	77427544	77428738	0	1	1194	0,
10	79683050	79702600	rnoiretrop13976.0	0	-	79683050	79702600	0	2	1812,158,	0,19392,
10	79887192	79887593	rnoiretrom13923.0	0	-	79887192	79887593	0	1	401	0,
10	79994582	79997895	rno_retrom01991.1	0	-	79994582	79997895	0	1	3313	0,
10	79994914	79996786	rno_retrom01991.0	0	-	79994914	79996786	0	1	1872	0,
10	94569230	94573065	rno_retrom02049.0	0	-	94569230	94573065	0	1	3835	0,
10	97746982	97747584	rno_retrop02004.0	0	+	97746982	97747584	0	1	602	0,
10	98928547	98933820	rno_retrom02058.0	0	-	98928547	98933820	0	1	5273	0,
10	105805299	105805737	rnoiretrop14539.0	0	+	105805299	105805737	0	1	438	0,
11	31486914	31488085	rno_retrop00763.0	0	+	31486914	31488085	0	1	1171	0,
11	38234966	38235914	rno_retrom00768.0	0	-	38234966	38235914	0	1	948	0,
11	44075636	44095178	rno_retrop00816.0	0	+	44075636	44095178	0	8	81,217,111,102,88,141,210,677,	0,1856,5016,7748,8715,9245,15411,18865,
11	63683299	63683592	rno_retrop00846.0	0	+	63683299	63683592	0	1	293	0,
11	66482331	66483732	rno_retrop00855.0	0	+	66482331	66483732	0	1	1401	0,
11	70679718	70680878	rno_retrom00823.0	0	-	70679718	70680878	0	1	1160	0,
11	80306845	80327968	rno_retrom00841.0	0	-	80306845	80327968	0	2	1562,59,	0,21064,
11	81379678	81380282	rno_retrop00883.0	0	+	81379678	81380282	0	1	604	0,
11	86675197	86675851	rno_retrom00869.0	0	-	86675197	86675851	0	1	654	0,
12	8421055	8422900	rnoiretrop00202.0	0	+	8421055	8422900	0	2	468,539,	0,1306,
12	11780095	11780225	rnoiretrom00272.0	0	-	11780095	11780225	0	1	130	0,
12	12440871	12445123	rno_retrop00066.0	0	+	12440871	12445123	0	1	4252	0,
12	17467628	17468570	rno_retrop00077.0	0	+	17467628	17468570	0	1	942	0,
12	17527904	17528279	rno_retrop00078.0	0	+	17527904	17528279	0	1	375	0,
12	21859823	21888039	rno_retrop00105.1	0	+	21859823	21888039	0	2	212,3223,	0,24993,
12	21859924	21888039	rno_retrop00105.0	0	+	21859924	21888039	0	2	111,3223,	0,24892,
12	31330392	31331219	rno_retrom00149.0	0	-	31330392	31331219	0	1	827	0,
12	31879286	31881320	rno_retrop00117.0	0	+	31879286	31881320	0	2	122,874,	0,1160,
12	31880196	31881471	rno_retrop00117.1	0	+	31880196	31881471	0	1	1275	0,
13	1120915	1121139	rnoiretrom14651.0	0	-	1120915	1121139	0	1	224	0,
13	32276983	32280289	rno_retrop02069.0	0	+	32276983	32280289	0	1	3306	0,
13	44078006	44086506	rnoiretrom15067.0	0	-	44078006	44086506	0	2	1765,93,	0,8407,
13	49446524	49447970	rno_retrop02104.0	0	+	49446524	49447970	0	2	117,1138,	0,308,
13	61634612	61676539	rno_retrom02185.0	0	-	61634612	61676539	0	5	54,78,121,65,952,	0,29237,32904,39050,40975,
13	61663849	61676539	rno_retrom02185.1	0	-	61663849	61676539	0	4	78,121,65,952,	0,3667,9813,11738,
13	66690298	66690791	rno_retrom02188.0	0	-	66690298	66690791	0	1	493	0,
13	67963561	67964413	rno_retrom02191.0	0	-	67963561	67964413	0	1	852	0,
13	72672916	72679982	rnoiretrop15439.0	0	+	72672916	72679982	0	3	532,52,475,	0,1115,6591,
13	72672940	72679703	rnoiretrop15439.1	0	+	72672940	72679703	0	3	508,52,196,	0,1091,6567,
13	86732219	86733130	rno_retrop02182.0	0	+	86732219	86733130	0	1	911	0,
13	91235669	91237010	rno_retrom02257.0	0	-	91235669	91237010	0	1	1341	0,
13	91420564	91421945	rno_retrom02258.0	0	-	91420564	91421945	0	1	1381	0,
13	103082868	103086605	rno_retrop02235.0	0	+	103082868	103086605	0	1	3737	0,
14	1093075	1095197	rno_retrom02323.0	0	-	1093075	1095197	0	1	2122	0,
14	2469782	2471240	rno_retrom02344.0	0	-	2469782	2471240	0	1	1458	0,
14	13547938	13549810	rnoiretrop16398.0	0	+	13547938	13549810	0	1	1872	0,
14	13547940	13549536	rnoiretrop16398.1	0	+	13547940	13549536	0	1	1596	0,
14	13633094	13641291	rno_retrop02285.0	0	+	13633094	13641291	0	2	786,604,	0,7593,
14	37741418	37743007	rno_retrop02311.0	0	+	37741418	37743007	0	1	1589	0,
14	39191343	39267807	rno_retrop02315.0	0	+	39191343	39267807	0	3	50,36,369,	0,1689,76095,
14	44785101	44848310	rno_retrop02322.0	0	+	44785101	44848310	0	6	44,120,1160,207,206,2750,	0,30783,53048,55020,57348,60459,
14	44815884	44848310	rno_retrop02322.1	0	+	44815884	44848310	0	5	120,1160,207,206,2750,	0,22265,24237,26565,29676,
14	48619019	48620449	rnoiretrop16854.0	0	+	48619019	48620449	0	1	1430	0,
14	58071061	58072033	rno_retrom02448.0	0	-	58071061	58072033	0	1	972	0,
14	79624057	79625288	rnoiretrop17251.0	0	+	79624057	79625288	0	1	1231	0,
14	83448399	83457535	rno_retrom02477.0	0	-	83448399	83457535	0	2	1421,18,	0,9118,
14	87241274	87245805	rno_retrop02414.0	0	+	87241274	87245805	0	1	4531	0,
14	101641856	101650443	rno_retrom02506.0	0	-	101641856	101650443	0	2	2408,42,	0,8545,
15	21843143	21843546	rno_retrom01395.0	0	-	21843143	21843546	0	1	403	0,
15	35788648	35805593	rnoiretrop10740.0	0	-	35788648	35805593	0	5	3640,1033,286,91,444,	0,7771,10803,16237,16501,
15	42695095	42696434	rno_retrom01625.0	0	-	42695095	42696434	0	1	1339	0,
15	51434186	51438303	rno_retrom01641.0	0	-	51434186	51438303	0	2	697,155,	0,3962,
15	64161683	64162743	rno_retrom01656.0	0	-	64161683	64162743	0	1	1060	0,
15	65846911	65848066	rno_retrop01610.0	0	+	65846911	65848066	0	1	1155	0,
15	81175113	81176078	rnoiretrom11219.0	0	-	81175113	81176078	0	1	965	0,
15	86149814	86150497	rno_retrop01630.0	0	+	86149814	86150497	0	1	683	0,
16	16029781	16030449	rno_retrom00930.0	0	-	16029781	16030449	0	1	668	0,
16	18713338	18714507	rno_retrop00973.0	0	+	18713338	18714507	0	1	1169	0,
16	19286608	19291972	rno_retrom00939.0	0	+	19286608	19291972	0	1	5364	0,
16	22745901	22746940	rnoiretrom06308.0	0	-	22745901	22746940	0	1	1039	0,
16	24917199	24921475	rno_retrom00957.1	0	-	24917199	24921475	0	1	4276	0,
16	25751515	25752392	rno_retrop00987.0	0	+	25751515	25752392	0	1	877	0,
16	32930919	32941054	rno_retrop01001.0	0	+	32930919	32941054	0	3	5104,156,248,	0,8203,9887,
16	52150072	52158679	rnoiretrop07303.0	0	+	52150072	52158679	0	3	205,77,1373,	0,3612,7234,
16	52150072	52158679	rnoiretrop07303.1	0	+	52150072	52158679	0	4	205,80,77,1373,	0,1149,3612,7234,
16	52157371	52158679	rnoiretrop07303.2	0	+	52157371	52158679	0	1	1308	0,
16	71035535	71036157	rno_retrop01066.0	0	+	71035535	71036157	0	1	622	0,
16	86124107	86125510	rno_retrom01083.0	0	-	86124107	86125510	0	1	1403	0,
17	12452047	12452551	rno_retrop01114.0	0	+	12452047	12452551	0	1	504	0,
17	20562264	20563710	rno_retrom01131.0	0	-	20562264	20563710	0	1	1446	0,
17	36510973	36530417	rno_retrom01172.0	0	-	36510973	36530417	0	2	1132,42,	0,19402,
17	48283887	48286475	rno_retrom01198.0	0	-	48283887	48286475	0	1	2588	0,
17	48514788	48515350	rno_retrop01188.0	0	+	48514788	48515350	0	1	562	0,
17	50777805	50779392	rno_retrop01208.0	0	+	50777805	50779392	0	1	1587	0,
17	68035273	68035948	rno_retrom01288.0	0	-	68035273	68035948	0	1	675	0,
17	77594500	77596058	rno_retrop01277.0	0	+	77594500	77596058	0	1	1558	0,
18	913613	914603	rno_retrom00516.0	0	-	913613	914603	0	1	990	0,
18	2274152	2274727	rno_retrom00529.0	0	-	2274152	2274727	0	1	575	0,
18	24584701	24605938	rno_retrom00565.0	0	-	24584701	24605938	0	3	2002,174,698,	0,10401,20539,
18	25034948	25036155	rno_retrop00537.0	0	+	25034948	25036155	0	1	1207	0,
18	26889964	26891551	rnoiretrom03660.0	0	+	26889964	26891551	0	1	1587	0,
18	28524593	28528718	rno_retrop00546.0	0	+	28524593	28528718	0	2	51,658,	0,3467,
18	30534452	30539115	rno_retrom00583.0	0	-	30534452	30539115	0	1	4663	0,
18	30539598	30543507	rnoiretrom03774.0	0	-	30539598	30543507	0	2	3370,162,	0,3747,
18	32756427	32758975	rno_retrop00610.0	0	+	32756427	32758975	0	1	2548	0,
18	37496079	37497906	rnoiretrom03921.0	0	-	37496079	37497906	0	1	1827	0,
18	40671758	40672716	rnoiretrom03962.0	0	-	40671758	40672716	0	1	958	0,
18	40808178	40820156	rnoiretrop04195.0	0	+	40808178	40820156	0	3	66,47,2335,	0,914,9643,
18	45740716	45743027	rnoiretrom04072.0	0	-	45740716	45743027	0	2	174,786,	0,1525,
18	45742072	45743018	rnoiretrom04072.1	0	-	45742072	45743018	0	1	946	0,
18	47678366	47679775	rno_retrop00642.0	0	+	47678366	47679775	0	1	1409	0,
18	48053584	48055423	rno_retrop00645.0	0	+	48053584	48055423	0	1	1839	0,
18	61521536	61525312	rno_retrop00670.0	0	+	61521536	61525312	0	2	2317,742,	0,3034,
18	61524592	61525327	rno_retrop00670.1	0	+	61524592	61525327	0	1	735	0,
18	63426175	63427040	rno_retrom00664.0	0	-	63426175	63427040	0	1	865	0,
18	63715138	63717590	rno_retrop00678.0	0	+	63715138	63717590	0	1	2452	0,
18	76848361	76849168	rno_retrop00697.0	0	+	76848361	76849168	0	1	807	0,
18	77105773	77112132	rno_retrop00703.0	0	+	77105773	77112132	0	4	32,190,69,1344,	0,310,3291,5015,
19	9122865	9123832	rnoiretrop02331.0	0	+	9122865	9123832	0	1	967	0,
19	9876710	9878612	rno_retrom00407.0	0	-	9876710	9878612	0	1	1902	0,
19	9876710	9885273	rno_retrom00407.1	0	-	9876710	9885273	0	3	1827,234,275,	0,4439,8288,
19	10974863	10975062	rnoiretrop02382.0	0	+	10974863	10975062	0	1	199	0,
19	19169169	19169940	rno_retrop00413.0	0	+	19169169	19169940	0	1	771	0,
19	19614409	19615943	rno_retrom00425.0	0	-	19614409	19615943	0	2	126,655,	0,879,
19	23434816	23435469	rno_retrop00430.0	0	+	23434816	23435469	0	1	653	0,
19	26222030	26225015	rno_retrom00443.0	0	-	26222030	26225015	0	1	2985	0,
19	31310347	31313881	rno_retrop00448.0	0	+	31310347	31313881	0	2	59,1534,	0,2000,
19	31312305	31314152	rno_retrop00448.1	0	+	31312305	31314152	0	1	1847	0,
19	40219213	40328385	rno_retrop00473.0	0	+	40219213	40328385	0	13	100,202,184,100,119,224,68,236,101,136,165,153,1056,	0,21934,30400,44065,55919,61650,69467,75890,78613,80912,83441,84816,108116,
19	47828674	47840327	rno_retrop00489.0	0	+	47828674	47840327	0	3	20,94,754,	0,10076,10899,
19	56904409	56904843	rno_retrop00507.0	0	+	56904409	56904843	0	1	434	0,
2	12839355	12842409	rno_retrom06116.0	0	-	12839355	12842409	0	1	3054	0,
2	23946742	23947063	rnoiretrom44834.0	0	-	23946742	23947063	0	1	321	0,
2	30693742	30702769	rnoiretrop42602.0	0	+	30693742	30702769	0	3	65,99,568,	0,7314,8459,
2	31454879	31458350	rnoiretrop42635.0	0	+	31454879	31458350	0	3	46,93,814,	0,1832,2657,
2	45420178	45420602	rnoiretrop42824.0	0	+	45420178	45420602	0	2	42,375,	0,49,
2	61989931	61990786	rno_retrom06199.0	0	-	61989931	61990786	0	1	855	0,
2	127828152	127830324	rno_retrom06277.0	0	-	127828152	127830324	0	2	732,1002,	0,1170,
2	127828152	127830417	rno_retrom06277.1	0	-	127828152	127830417	0	1	2265	0,
2	137166390	137169599	rno_retrom06289.0	0	-	137166390	137169599	0	2	142,350,	0,2859,
2	177242728	177244465	rno_retrom06353.0	0	-	177242728	177244465	0	1	1737	0,
2	180380989	180435828	rnoiretrop44398.0	0	+	180380989	180435828	0	13	2185,51,63,97,118,187,150,133,82,181,246,132,1997,	0,3648,3776,6499,8454,40711,43670,44659,44966,49668,51812,52402,52842,
2	187323874	187335303	rnoiretrom46830.0	0	+	187323874	187335303	0	2	152,11177,	0,252,
2	188673568	188706093	rnoiretrom46969.0	0	-	188673568	188706093	0	2	704,6,	0,32519,
2	190398157	190398668	rno_retrom06434.0	0	-	190398157	190398668	0	1	511	0,
2	191043057	191044133	rno_retrom06444.0	0	-	191043057	191044133	0	1	1076	0,
2	197672020	197673096	rno_retrom06461.0	0	-	197672020	197673096	0	1	1076	0,
2	204114215	204114748	rnoiretrop45169.0	0	+	204114215	204114748	0	1	533	0,
2	221093435	221095808	rnoiretrop45337.0	0	+	221093435	221095808	0	1	2373	0,
2	238983301	238984650	rno_retrom06531.0	0	-	238983301	238984650	0	1	1349	0,
2	252624342	252626374	rnoiretrop45695.0	0	-	252624342	252626374	0	1	2032	0,
20	2810342	2811354	rnoiretrom01420.0	0	-	2810342	2811354	0	1	1012	0,
20	3956563	3958008	rno_retrop00221.0	0	+	3956563	3958008	0	1	1445	0,
20	13227780	13228613	rno_retrop00245.0	0	+	13227780	13228613	0	1	833	0,
20	14146843	14198388	rnoiretrom01748.0	0	-	14146843	14198388	0	3	1951,1211,62,	0,26556,51483,
20	14255699	14256720	rno_retrop00246.0	0	+	14255699	14256720	0	1	1021	0,
20	17281107	17281888	rno_retrop00249.0	0	+	17281107	17281888	0	1	781	0,
20	22562574	22563800	rnoiretrop01769.0	0	+	22562574	22563800	0	1	1226	0,
20	33382227	33383384	rnoiretrom02035.0	0	-	33382227	33383384	0	1	1157	0,
20	34899250	34907935	rnoiretrop01976.0	0	+	34899250	34907935	0	3	34,101,2151,	0,820,6534,
20	37276014	37316592	rno_retrom00350.0	0	-	37276014	37316592	0	25	147,102,202,179,87,171,4768,95,136,84,180,147,138,162,124,176,182,210,88,193,146,231,153,112,59,	0,2197,4140,7473,8118,8912,11343,16911,21505,24393,24572,25489,25709,26065,26727,27013,27272,29473,30915,33894,35974,36403,37113,38380,40519,
20	48142181	48144528	rno_retrom00382.0	0	-	48142181	48144528	0	1	2347	0,
20	53223833	53228265	rno_retrom00392.0	0	-	53223833	53228265	0	1	4432	0,
3	5781283	5781771	rnoiretrop31690.0	0	+	5781283	5781771	0	1	488	0,
3	16865871	16873974	rnoiretrop32066.0	0	-	16865871	16873974	0	2	777,34,	0,8069,
3	31101135	31102406	rno_retrom04625.0	0	-	31101135	31102406	0	1	1271	0,
3	40427430	40431588	rnoiretrop32347.0	0	+	40427430	40431588	0	2	161,834,	0,3324,
3	40430192	40431600	rnoiretrop32347.1	0	+	40430192	40431600	0	2	115,846,	0,562,
3	48568797	48570749	rno_retrom04651.0	0	-	48568797	48570749	0	1	1952	0,
3	55312132	55313078	rnoiretrop32549.0	0	+	55312132	55313078	0	1	946	0,
3	58396467	58399461	rno_retrom04661.0	0	-	58396467	58399461	0	2	2037,74,	0,2920,
3	58396467	58399728	rno_retrom04661.1	0	-	58396467	58399728	0	3	1757,119,341,	0,1918,2920,
3	61403861	61406158	rnoiretrop32756.0	0	+	61403861	61406158	0	1	2297	0,
3	67092903	67095127	rnoiretrop32797.0	0	+	67092903	67095127	0	1	2224	0,
3	105787124	105789048	rnoiretrom36039.0	0	-	105787124	105789048	0	3	1244,59,250,	0,1438,1674,
3	118467630	118479724	rnoiretrop34653.0	0	+	118467630	118479724	0	2	155,1339,	0,10755,
3	128260466	128260724	rnoiretrop34812.0	0	+	128260466	128260724	0	1	258	0,
3	137405012	137407873	rnoiretrop34937.0	0	+	137405012	137407873	0	2	50,742,	0,2119,
3	138281089	138281688	rnoiretrop34951.0	0	+	138281089	138281688	0	1	599	0,
3	141131281	141147611	rnoiretrop35041.0	0	-	141131281	141147611	0	6	260,78,197,989,202,769,	0,4618,12402,13683,15149,15561,
3	141131281	141147611	rnoiretrop35041.1	0	-	141131281	141147611	0	4	260,78,1727,769,	0,4618,13683,15561,
3	141147522	141148178	rnoiretrop35041.2	0	+	141147522	141148178	0	1	656	0,
3	141545080	141546650	rno_retrom05033.0	0	-	141545080	141546650	0	1	1570	0,
3	143038272	143038700	rnoiretrop35108.0	0	+	143038272	143038700	0	1	428	0,
3	143660234	143666088	rnoiretrop35160.0	0	+	143660234	143666088	0	2	218,1307,	0,4547,
3	145106486	145107836	rno_retrom05057.0	0	-	145106486	145107836	0	1	1350	0,
3	147573900	147576569	rno_retrom05064.0	0	-	147573900	147576569	0	2	2155,85,	0,2584,
3	163941735	163942167	rno_retrom05104.0	0	-	163941735	163942167	0	1	432	0,
3	170627955	170630047	rnoiretrop35637.0	0	+	170627955	170630047	0	1	2092	0,
4	5903254	5906502	rno_retrom05517.0	0	-	5903254	5906502	0	2	1288,187,	0,3061,
4	5903254	5906511	rno_retrom05517.1	0	-	5903254	5906511	0	2	1291,51,	0,3206,
4	5903254	5906513	rno_retrom05517.2	0	-	5903254	5906513	0	2	1500,53,	0,3206,
4	49065463	49069169	rno_retrom05594.0	0	-	49065463	49069169	0	3	760,363,168,	0,1964,3538,
4	50024539	50027376	rnoiretrom40894.0	0	-	50024539	50027376	0	2	1700,133,	0,2704,
4	50029891	50031052	rnoiretrom40900.0	0	-	50029891	50031052	0	1	1161	0,
4	61858874	61888000	rnoiretrop39111.0	0	+	61858874	61888000	0	3	76,661,841,	0,11748,28285,
4	76413341	76415040	rnoiretrom41306.0	0	-	76413341	76415040	0	1	1699	0,
4	78806890	78807410	rno_retrom05653.0	0	-	78806890	78807410	0	1	520	0,
4	95635685	95637043	rnoiretrop39959.0	0	+	95635685	95637043	0	1	1358	0,
4	97803196	97804866	rno_retrom05705.0	0	-	97803196	97804866	0	1	1670	0,
4	104470695	104471114	rno_retrom05894.0	0	-	104470695	104471114	0	1	419	0,
4	106795911	106796913	rno_retrom05901.0	0	-	106795911	106796913	0	1	1002	0,
4	120719134	120720573	rno_retrom05928.0	0	-	120719134	120720573	0	1	1439	0,
4	121057266	121057598	rno_retrom05929.0	0	-	121057266	121057598	0	1	332	0,
4	122302766	122303407	rnoiretrop41183.0	0	+	122302766	122303407	0	1	641	0,
4	122558135	122558424	rno_retrom05936.0	0	-	122558135	122558424	0	1	289	0,
4	128819456	128820691	rno_retrom05960.0	0	-	128819456	128820691	0	1	1235	0,
4	130736917	130738614	rno_retrom05963.0	0	-	130736917	130738614	0	1	1697	0,
4	135571399	135578148	rnoiretrop41352.1	0	+	135571399	135578148	0	3	1241,96,2774,	0,2721,3975,
4	152157380	152158176	rnoiretrop41496.0	0	+	152157380	152158176	0	1	796	0,
4	154207303	154228904	rnoiretrop41572.0	0	+	154207303	154228904	0	4	301,132,61,2421,	0,13078,14691,19180,
4	154220381	154228871	rnoiretrop41572.1	0	+	154220381	154228871	0	3	132,61,2388,	0,1613,6102,
4	163364251	163364930	rno_retrom06023.0	0	-	163364251	163364930	0	1	679	0,
4	164672231	164674502	rnoiretrom44124.0	0	-	164672231	164674502	0	1	2271	0,
4	165189893	165190963	rno_retrom06032.0	0	-	165189893	165190963	0	1	1070	0,
4	165674874	165676146	rnoiretrop41837.0	0	+	165674874	165676146	0	1	1272	0,
4	172257808	172259019	rno_retrom06067.0	0	-	172257808	172259019	0	1	1211	0,
4	174254778	174264352	rnoiretrom44403.0	0	-	174254778	174264352	0	2	341,1038,	0,8536,
4	175746766	175748241	rno_retrom06078.0	0	-	175746766	175748241	0	1	1475	0,
4	185977421	185978334	rnoiretrop42067.0	0	+	185977421	185978334	0	1	913	0,
5	4528444	4528885	rnoiretrop35769.0	0	+	4528444	4528885	0	2	263,171,	0,270,
5	4664620	4665491	rnoiretrop35779.0	0	+	4664620	4665491	0	1	871	0,
5	9052472	9052785	rnoiretrop35811.0	0	+	9052472	9052785	0	1	313	0,
5	15325456	15325621	rnoiretrop35898.0	0	+	15325456	15325621	0	1	165	0,
5	17836059	17837636	rno_retrom05148.0	0	-	17836059	17837636	0	1	1577	0,
5	18796623	18797332	rno_retrom05149.0	0	-	18796623	18797332	0	1	709	0,
5	56705542	56706949	rnoiretrop36353.0	0	+	56705542	56706949	0	2	173,1012,	0,395,
5	62314146	62316267	rnoiretrop36471.0	0	+	62314146	62316267	0	1	2121	0,
5	66421274	66424481	rno_retrom05235.0	0	-	66421274	66424481	0	2	2311,639,	0,2568,
5	73006349	73007184	rno_retrom05253.0	0	-	73006349	73007184	0	1	835	0,
5	105659702	105661260	rnoiretrop36907.0	0	+	105659702	105661260	0	1	1558	0,
5	108196990	108201162	rno_retrom05320.0	0	-	108196990	108201162	0	1	4172	0,
5	116767926	116779978	rnoiretrop37078.0	0	-	116767926	116779978	0	4	7321,150,257,312,	0,8015,11097,11740,
5	116767926	116779978	rnoiretrop37078.1	0	-	116767926	116779978	0	4	7321,150,224,312,	0,8015,11097,11740,
5	118566969	118568188	rnoiretrop37097.0	0	+	118566969	118568188	0	1	1219	0,
5	118761414	118806815	rnoiretrop37116.0	0	-	118761414	118806815	0	10	4487,129,74,92,109,70,368,105,59,196,	0,6809,15551,19003,24303,31757,33971,37882,44971,45205,
5	118761414	118806815	rnoiretrop37116.1	0	-	118761414	118806815	0	9	4487,129,74,92,109,70,368,59,196,	0,6809,15551,19003,24303,31757,33971,44971,45205,
5	118761414	118806815	rnoiretrop37116.2	0	-	118761414	118806815	0	9	4487,129,74,92,109,70,368,105,196,	0,6809,15551,19003,24303,31757,33971,37882,45205,
5	136271948	136273139	rno_retrom05369.0	0	-	136271948	136273139	0	1	1191	0,
5	139578657	139579088	rnoiretrop37512.0	0	+	139578657	139579088	0	1	431	0,
5	142627901	142638528	rno_retrom05410.0	0	-	142627901	142638528	0	5	585,111,80,195,2011,	0,3787,4295,4814,8616,
5	146450567	146450899	rnoiretrom39569.0	0	-	146450567	146450899	0	1	332	0,
5	151294004	151295657	rnoiretrop37771.0	0	+	151294004	151295657	0	1	1653	0,
5	151478723	151480466	rnoiretrop37794.0	0	+	151478723	151480466	0	1	1743	0,
5	159941434	159946430	rnoiretrop38007.0	0	+	159941434	159946430	0	2	229,152,	0,4844,
5	169076391	169076868	rno_retrom05497.0	0	-	169076391	169076868	0	1	477	0,
5	169096175	169098571	rnoiretrop38207.2	0	+	169096175	169098571	0	1	2396	0,
5	169096223	169098519	rnoiretrop38207.0	0	+	169096223	169098519	0	1	2296	0,
5	169096223	169098519	rnoiretrop38207.1	0	+	169096223	169098519	0	1	2296	0,
5	171473779	171475183	rno_retrom05499.0	0	-	171473779	171475183	0	1	1404	0,
5	172410866	172411065	rno_retrom05501.0	0	-	172410866	172411065	0	1	199	0,
6	10391735	10392689	rno_retrom03501.0	0	-	10391735	10392689	0	1	954	0,
6	23095945	23096645	rno_retrom03525.0	0	-	23095945	23096645	0	1	700	0,
6	32052217	32054560	rno_retrom03541.0	0	-	32052217	32054560	0	1	2343	0,
6	33868174	33872840	rnoiretrop25996.0	0	+	33868174	33872840	0	2	377,1011,	0,3655,
6	51849251	51850794	rnoiretrop26261.0	0	+	51849251	51850794	0	1	1543	0,
6	53652111	53653227	rnoiretrop26298.0	0	+	53652111	53653227	0	1	1116	0,
6	74875295	74880711	rno_retrom03609.0	0	-	74875295	74880711	0	2	2158,557,	0,4859,
6	75812060	75813762	rnoiretrop26500.0	0	+	75812060	75813762	0	1	1702	0,
6	76153225	76154072	rno_retrom03615.0	0	-	76153225	76154072	0	1	847	0,
6	77692041	77693663	rnoiretrop26572.0	0	+	77692041	77693663	0	1	1622	0,
6	86526571	86526938	rnoiretrop26733.0	0	+	86526571	86526938	0	1	367	0,
6	87928574	87930968	rno_retrom03633.0	0	-	87928574	87930968	0	1	2394	0,
6	91135717	91137063	rno_retrom03639.0	0	-	91135717	91137063	0	2	425,21,	0,1325,
6	91337209	91340903	rnoiretrop26842.0	0	+	91337209	91340903	0	1	3694	0,
6	93454358	93455139	rnoiretrop26880.1	0	+	93454358	93455139	0	1	781	0,
6	96028920	96032158	rno_retrom03657.0	0	-	96028920	96032158	0	1	3238	0,
6	99000650	99003070	rnoiretrop27011.0	0	+	99000650	99003070	0	1	2420	0,
6	102998344	102998624	rnoiretrom26422.0	0	-	102998344	102998624	0	1	280	0,
6	103984401	103985488	rnoiretrom26562.0	0	-	103984401	103985488	0	1	1087	0,
6	125416731	125420967	rnoiretrop27666.1	0	+	125416731	125420967	0	1	4236	0,
6	129220821	129221744	rnoiretrop27754.0	0	+	129220821	129221744	0	1	923	0,
6	136695376	136695628	rnoiretrop27889.0	0	+	136695376	136695628	0	1	252	0,
6	142904226	142905921	rnoiretrop28312.0	0	+	142904226	142905921	0	1	1695	0,
6	145183246	145184607	rnoiretrom29246.0	0	-	145183246	145184607	0	1	1361	0,
7	190564	247600	rno_retrom03049.1	0	-	190564	247600	0	3	780,68,931,	0,55893,56105,
7	723209	725582	rno_retrom03052.0	0	-	723209	725582	0	1	2373	0,
7	1828437	1839203	rno_retrom03059.0	0	-	1828437	1839203	0	4	485,1505,64,158,	0,7500,10227,10608,
7	10406598	10406917	rno_retrom03181.0	0	-	10406598	10406917	0	1	319	0,
7	11566807	11567364	rno_retrom03189.0	0	-	11566807	11567364	0	1	557	0,
7	13524427	13541127	rnoiretrop23514.2	0	+	13524427	13541127	0	4	114,127,61,4906,	0,9709,10036,11794,
7	13534136	13541127	rnoiretrop23514.0	0	+	13534136	13541127	0	3	127,61,4906,	0,327,2085,
7	13534136	13541127	rnoiretrop23514.1	0	+	13534136	13541127	0	3	127,61,4906,	0,327,2085,
7	13773503	13777637	rno_retrom03205.0	0	-	13773503	13777637	0	2	130,2742,	0,1392,
7	13894109	13898097	rno_retrom03206.0	0	-	13894109	13898097	0	1	3988	0,
7	20743876	20749013	rnoiretrop23726.0	0	+	20743876	20749013	0	2	110,2158,	0,2979,
7	23085579	23086849	rnoiretrom23055.0	0	-	23085579	23086849	0	1	1270	0,
7	36685316	36687029	rnoiretrop23994.0	0	+	36685316	36687029	0	1	1713	0,
7	51875754	51879470	rnoiretrom23354.0	0	-	51875754	51879470	0	1	3716	0,
7	55442350	55444773	rnoiretrom23402.0	0	-	55442350	55444773	0	1	2423	0,
7	78072187	78073408	rnoiretrom23769.0	0	+	78072187	78073408	0	1	1221	0,
7	95612204	95613080	rno_retrom03365.0	0	-	95612204	95613080	0	1	876	0,
7	95628286	95630311	rnoiretrop24671.0	0	+	95628286	95630311	0	1	2025	0,
7	97234809	97236816	rnoiretrop24697.0	0	+	97234809	97236816	0	2	51,1566,	0,441,
7	119005712	119006148	rno_retrom03426.0	0	-	119005712	119006148	0	1	436	0,
7	119736170	119738537	rnoiretrom24409.0	0	-	119736170	119738537	0	1	2367	0,
7	120364090	120365200	rnoiretrop25027.0	0	+	120364090	120365200	0	1	1110	0,
7	130232573	130232985	rnoiretrom24606.0	0	-	130232573	130232985	0	1	412	0,
7	136003678	136105890	rnoiretrop25180.0	0	+	136003678	136105890	0	4	33,66,136,1602,	0,3039,78134,100610,
7	136081811	136105890	rnoiretrop25180.1	0	+	136081811	136105890	0	2	137,1605,	0,22474,
7	136097292	136105890	rnoiretrop25180.2	0	+	136097292	136105890	0	2	223,1602,	0,6996,
7	136097292	136105890	rnoiretrop25180.3	0	+	136097292	136105890	0	2	223,1605,	0,6993,
7	136103843	136105890	rnoiretrop25180.4	0	+	136103843	136105890	0	1	2047	0,
7	141657556	141657952	rnoiretrop25365.0	0	+	141657556	141657952	0	1	396	0,
8	2863364	2864733	rno_retrom02716.0	0	-	2863364	2864733	0	2	331,89,	0,1280,
8	3238115	3239817	rnoiretrom18953.0	0	-	3238115	3239817	0	1	1702	0,
8	24852071	24853521	rno_retrom02788.0	0	-	24852071	24853521	0	1	1450	0,
8	24852072	24853322	rno_retrom02788.1	0	-	24852072	24853322	0	1	1250	0,
8	54204508	54204981	rno_retrom02884.0	0	-	54204508	54204981	0	1	473	0,
8	63523512	63525038	rno_retrom02909.0	0	-	63523512	63525038	0	1	1526	0,
8	69397471	69397815	rnoiretrop21291.0	0	+	69397471	69397815	0	1	344	0,
8	72139571	72141754	rno_retrom02924.0	0	-	72139571	72141754	0	1	2183	0,
8	77956840	78041845	rno_retrop02914.0	0	+	77956840	78041845	0	2	74,434,	0,84571,
8	92385266	92385776	rnoiretrop21667.0	0	+	92385266	92385776	0	1	510	0,
8	115413114	115413565	rnoiretrop22075.0	0	+	115413114	115413565	0	1	451	0,
8	125713135	125713529	rnoiretrom21481.0	0	-	125713135	125713529	0	1	394	0,
8	126999303	127000152	rnoiretrop22211.0	0	+	126999303	127000152	0	1	849	0,
9	16705773	16707449	rno_retrop02493.0	0	+	16705773	16707449	0	1	1676	0,
9	21934174	21935890	rno_retrom02563.0	0	-	21934174	21935890	0	1	1716	0,
9	22170283	22175439	rnoiretrom17809.0	0	+	22170283	22175439	0	1	5156	0,
9	27510688	27516242	rno_retrom02569.0	0	-	27510688	27516242	0	2	4117,122,	0,5432,
9	29448965	29450494	rno_retrop02509.0	0	+	29448965	29450494	0	1	1529	0,
9	42194326	42195019	rno_retrom02593.0	0	-	42194326	42195019	0	1	693	0,
9	78410052	78411741	rno_retrom02648.0	0	-	78410052	78411741	0	1	1689	0,
9	87085524	87086524	rno_retrom02668.0	0	-	87085524	87086524	0	1	1000	0,
9	93253941	93254598	rno_retrom02682.0	0	-	93253941	93254598	0	1	657	0,
9	97909422	97909667	rno_retrop02645.0	0	+	97909422	97909667	0	1	245	0,
9	104391670	104393869	rno_retrom02690.0	0	-	104391670	104393869	0	2	1513,143,	0,2056,
9	104391670	104395395	rno_retrom02690.2	0	-	104391670	104395395	0	2	1513,59,	0,3666,
9	104391670	104395401	rno_retrom02690.1	0	-	104391670	104395401	0	3	1513,146,65,	0,2056,3666,
9	104391670	104396092	rno_retrom02690.3	0	-	104391670	104396092	0	2	1513,5,	0,4417,
9	104926443	104929007	rno_retrom02694.0	0	-	104926443	104929007	0	1	2564	0,
9	105242719	105243362	rno_retrop02652.0	0	+	105242719	105243362	0	1	643	0,
9	105303392	105316282	rno_retrop02653.0	0	+	105303392	105316282	0	3	654,123,904,	0,5843,11986,
X	175891	179416	rnoiretrop28395.0	0	+	175891	179416	0	2	1728,1707,	0,1818,
X	9230746	9263114	rno_retrom04105.0	0	-	9230746	9263114	0	2	1334,65,	0,32303,
X	9557023	9570501	rnoiretrop28634.0	0	+	9557023	9570501	0	2	78,1276,	0,12202,
X	11179362	11179676	rno_retrom04108.0	0	-	11179362	11179676	0	1	314	0,
X	11346515	11347143	rno_retrom04109.0	0	-	11346515	11347143	0	1	628	0,
X	16341490	16348704	rnoiretrop28730.0	0	+	16341490	16348704	0	1	7214	0,
X	19569758	19570552	rnoiretrop28782.0	0	+	19569758	19570552	0	1	794	0,
X	21893665	21895184	rno_retrom04137.0	0	-	21893665	21895184	0	1	1519	0,
X	22226116	22226688	rno_retrom04139.0	0	-	22226116	22226688	0	1	572	0,
X	25893883	25894731	rnoiretrop28873.0	0	+	25893883	25894731	0	1	848	0,
X	25991416	25992538	rnoiretrop28888.0	0	+	25991416	25992538	0	1	1122	0,
X	26150667	26151506	rno_retrom04152.0	0	-	26150667	26151506	0	1	839	0,
X	26275172	26284765	rnoiretrop28917.0	0	+	26275172	26284765	0	13	179,156,70,91,79,53,54,103,84,98,147,42,2056,	0,1026,1426,1582,2842,4720,4861,5021,5232,5837,6055,6378,7537,
X	26280967	26284765	rnoiretrop28917.1	0	+	26280967	26284765	0	4	140,189,42,2056,	0,218,583,1742,
X	27946997	27949473	rnoiretrop29007.0	0	+	27946997	27949473	0	2	134,1700,	0,776,
X	28682866	28689243	rnoiretrop29023.0	0	+	28682866	28689243	0	2	582,1681,	0,4696,
X	28839781	28844038	rno_retrom04166.0	0	-	28839781	28844038	0	2	1033,574,	0,3683,
X	29824090	29824606	rnoiretrop29062.0	0	+	29824090	29824606	0	1	516	0,
X	34504889	34507015	rno_retrom04192.0	0	-	34504889	34507015	0	1	2126	0,
X	37609290	37611227	rno_retrom04199.0	0	-	37609290	37611227	0	2	1044,250,	0,1687,
X	37993984	37996222	rno_retrom04200.0	0	-	37993984	37996222	0	1	2238	0,
X	45029628	45031174	rnoiretrop29289.0	0	+	45029628	45031174	0	2	105,1163,	0,383,
X	48658595	48660573	rnoiretrop29325.0	0	+	48658595	48660573	0	1	1978	0,
X	51496731	51497946	rnoiretrop29372.0	0	+	51496731	51497946	0	1	1215	0,
X	63905664	63907472	rno_retrom04271.0	0	-	63905664	63907472	0	1	1808	0,
X	73881790	73882024	rnoiretrop29768.0	0	+	73881790	73882024	0	1	234	0,
X	77325972	77433283	rnoiretrop29810.0	0	+	77325972	77433283	0	3	63,57,2898,	0,30026,104413,
X	82183111	82187109	rnoiretrom31144.0	0	-	82183111	82187109	0	1	3998	0,
X	82269902	82272325	rnoiretrop29930.0	0	+	82269902	82272325	0	1	2423	0,
X	86818168	86820473	rnoiretrop30055.0	0	+	86818168	86820473	0	1	2305	0,
X	91615405	91616159	rnoiretrop30203.1	0	+	91615405	91616159	0	1	754	0,
X	91615405	91616460	rnoiretrop30203.0	0	+	91615405	91616460	0	1	1055	0,
X	100806644	100807158	rnoiretrop30480.0	0	+	100806644	100807158	0	1	514	0,
X	103550489	103550951	rno_retrom04400.0	0	-	103550489	103550951	0	1	462	0,
X	113481616	113483901	rno_retrom04414.0	0	-	113481616	113483901	0	1	2285	0,
X	113765684	113768097	rnoiretrop30635.0	0	+	113765684	113768097	0	1	2413	0,
X	114933825	114935774	rnoiretrom31774.0	0	-	114933825	114935774	0	1	1949	0,
X	122056645	122062468	rnoiretrop30697.0	0	+	122056645	122062468	0	4	64,63,45,2154,	0,1394,1622,3669,
X	123250906	123253537	rnoiretrop30781.0	0	+	123250906	123253537	0	2	55,1412,	0,1219,
X	123288710	123289493	rnoiretrop30799.0	0	+	123288710	123289493	0	1	783	0,
X	124382875	124390005	rno_retrom04443.0	0	-	124382875	124390005	0	2	1499,85,	0,7045,
X	124382875	124390006	rno_retrom04443.1	0	-	124382875	124390006	0	3	1499,101,86,	0,2571,7045,
X	124527575	124528494	rno_retrom04444.0	0	-	124527575	124528494	0	1	919	0,
X	146110978	146112500	rnoiretrop31219.0	0	+	146110978	146112500	0	1	1522	0,

## Sheet: Opossum
# Supplemental Table S11: Retrocopy transcripts in opossum (BED12 format)
Chromosome	Start	End	Transcript_ID	Score (not defined)	Strand	Thick Start (not defined)	Thick End (not defined)	Item_RGB (not defined)	Exon_count	Exon_sizes	Exon_starts
1	5691819	5692918	mdo_retrop25690.0	0	+	5691819	5692918	0	1	1099,	0,
1	13071073	13074273	mdo_retrom26173.0	0	-	13071073	13074273	0	1	3200,	0,
1	13437605	13439877	mdo_retrom26176.0	0	-	13437605	13439877	0	1	2272,	0,
1	22920136	22922106	mdo_retrom26247.0	0	-	22920136	22922106	0	2	1431,81,	0,1889,
1	28604235	28606969	mdoiretrom28508.0	0	-	28604235	28606969	0	1	2734,	0,
1	58136326	58137310	mdo_retrom26429.0	0	-	58136326	58137310	0	1	984,	0,
1	66520348	66523446	mdoiretrom29350.0	0	-	66520348	66523446	0	1	3098,	0,
1	72990323	72991919	mdo_retrop26097.0	0	+	72990323	72991919	0	1	1596,	0,
1	74770907	74791069	mdo_retrom26526.0	0	-	74770907	74791069	0	6	997,129,100,54,74,39,	0,1212,4125,4526,13171,20123,
1	74770909	74791068	mdo_retrom26526.1	0	-	74770909	74791068	0	5	995,129,100,74,38,	0,1210,4123,13169,20121,
1	87760497	87762169	mdoiretrom28579.0	0	-	87760497	87762169	0	1	1672,	0,
1	93038538	93039840	mdoiretrop29784.0	0	+	93038538	93039840	0	1	1302,	0,
1	107038405	107039507	mdoiretrom25691.0	0	-	107038405	107039507	0	1	1102,	0,
1	110140582	110141079	mdo_retrom26768.0	0	-	110140582	110141079	0	1	497,	0,
1	112166813	112168222	mdoiretrop26432.0	0	+	112166813	112168222	0	1	1409,	0,
1	131828439	131829089	mdoiretrop29815.1	0	+	131828439	131829089	0	1	650,	0,
1	131828439	131829415	mdoiretrop29815.0	0	+	131828439	131829415	0	1	976,	0,
1	150663140	150664122	mdo_retrop26601.0	0	+	150663140	150664122	0	1	982,	0,
1	169503776	169504154	mdoiretrop23929.0	0	+	169503776	169504154	0	1	378,	0,
1	188039765	188042388	mdo_retrop26985.0	0	+	188039765	188042388	0	1	2623,	0,
1	197818814	197820806	mdo_retrom27468.0	0	-	197818814	197820806	0	3	445,59,341,	0,1179,1651,
1	206938856	207035174	mdo_retrom27519.0	0	-	206938856	207035174	0	7	3681,106,132,78,148,3882,415,	0,5438,13064,19254,35739,80633,95903,
1	207659982	207661374	mdo_retrop27109.0	0	+	207659982	207661374	0	1	1392,	0,
1	224148168	224148399	mdoiretrom29523.0	0	-	224148168	224148399	0	1	231,	0,
1	251078862	251079501	mdo_retrop27543.0	0	+	251078862	251079501	0	1	639,	0,
1	251383533	251384201	mdo_retrom27910.0	0	-	251383533	251384201	0	1	668,	0,
1	252711240	252711789	mdo_retrop27561.0	0	+	252711240	252711789	0	1	549,	0,
1	262979495	262982085	mdo_retrom27996.0	0	-	262979495	262982085	0	1	2590,	0,
1	263650803	263652491	mdo_retrom28002.0	0	-	263650803	263652491	0	1	1688,	0,
1	265469511	265472278	mdoiretrop29057.0	0	+	265469511	265472278	0	1	2767,	0,
1	267216507	267218705	mdo_retrop27685.0	0	-	267216507	267218705	0	1	2198,	0,
1	277877060	277881904	mdo_retrom28157.0	0	-	277877060	277881904	0	3	3783,180,455,	0,3894,4389,
1	287060310	287060682	mdo_retrom28333.0	0	-	287060310	287060682	0	1	372,	0,
1	311842648	311843841	mdo_retrom28689.0	0	-	311842648	311843841	0	1	1193,	0,
1	314641821	314643480	mdo_retrop28306.0	0	+	314641821	314643480	0	1	1659,	0,
1	319683332	319719088	mdo_retrom28759.0	0	-	319683332	319719088	0	3	115,1396,217,	0,33533,35539,
1	332613972	332616447	mdo_retrop28480.0	0	+	332613972	332616447	0	1	2475,	0,
1	332645041	332646807	mdo_retrop28484.0	0	+	332645041	332646807	0	1	1766,	0,
1	332668069	332900479	mdo_retrop28487.0	0	+	332668069	332900479	0	5	2485,59,89,102,2233,	0,192869,196907,229637,230177,
1	342073824	342074266	mdoiretrop24066.0	0	+	342073824	342074266	0	1	442,	0,
1	343245283	343255776	mdoiretrom29674.0	0	-	343245283	343255776	0	2	4107,140,	0,10353,
1	343245283	343256910	mdoiretrom29674.1	0	-	343245283	343256910	0	2	4107,1274,	0,10353,
1	401135767	401196916	mdoiretrom26120.0	0	-	401135767	401196916	0	9	3459,179,106,114,119,123,102,1473,159,	0,11228,11973,12756,23814,24209,24666,27511,60990,
1	404060776	404062114	mdo_retrop29128.0	0	+	404060776	404062114	0	1	1338,	0,
1	404393461	404429290	mdo_retrop29131.3	0	+	404393461	404429290	0	2	897,382,	0,35447,
1	404393469	404428283	mdo_retrop29131.1	0	+	404393469	404428283	0	3	889,121,168,	0,30100,34646,
1	404393470	404394420	mdo_retrop29131.0	0	+	404393470	404394420	0	1	950,	0,
1	404394222	404428283	mdo_retrop29131.2	0	+	404394222	404428283	0	3	136,121,168,	0,29347,33893,
1	408580015	408580372	mdo_retrop29163.0	0	+	408580015	408580372	0	1	357,	0,
1	422441481	422442888	mdo_retrop29310.0	0	+	422441481	422442888	0	1	1407,	0,
1	424129853	424157731	mdo_retrop29330.0	0	+	424129853	424157731	0	2	448,1641,	0,26237,
1	424130895	424157731	mdo_retrop29330.1	0	+	424130895	424157731	0	2	339,1641,	0,25195,
1	433284186	433285647	mdo_retrom29657.0	0	-	433284186	433285647	0	1	1461,	0,
1	435291738	435292480	mdoiretrop25883.0	0	+	435291738	435292480	0	1	742,	0,
1	437288737	437289291	mdoiretrom26175.0	0	-	437288737	437289291	0	1	554,	0,
1	437288737	437291446	mdoiretrom26175.1	0	-	437288737	437291446	0	2	543,799,	0,1910,
1	445970448	445971388	mdoiretrop30272.0	0	+	445970448	445971388	0	1	940,	0,
1	449694986	449697012	mdo_retrop29527.0	0	+	449694986	449697012	0	1	2026,	0,
1	449755525	449756009	mdo_retrom29768.0	0	-	449755525	449756009	0	1	484,	0,
1	453420281	453433590	mdo_retrop29544.0	0	+	453420281	453433590	0	8	166,82,91,167,172,149,4038,1939,	0,1084,3213,3643,5545,6471,7327,11370,
1	454859097	454863148	mdo_retrom29792.0	0	-	454859097	454863148	0	1	4051,	0,
1	488788952	488789215	mdo_retrom30023.0	0	-	488788952	488789215	0	1	263,	0,
1	500417422	500418762	mdo_retrom30102.0	0	-	500417422	500418762	0	1	1340,	0,
1	504953052	504953199	mdoiretrom26257.0	0	-	504953052	504953199	0	1	147,	0,
1	515473344	515473815	mdoiretrom24812.0	0	-	515473344	515473815	0	1	471,	0,
1	524005286	524015802	mdoiretrom26968.0	0	-	524005286	524015802	0	3	1820,95,157,	0,2419,10359,
1	532227669	532227986	mdo_retrop30091.0	0	+	532227669	532227986	0	1	317,	0,
1	533260438	533267093	mdo_retrom30328.0	0	-	533260438	533267093	0	4	1796,45,192,18,	0,3388,3765,6637,
1	557351957	557352333	mdo_retrop30312.0	0	+	557351957	557352333	0	1	376,	0,
1	559192580	559297728	mdo_retrop30333.0	0	+	559192580	559297728	0	4	119,156,69,1841,	0,79852,86985,103307,
1	559192587	559296531	mdo_retrop30333.1	0	+	559192587	559296531	0	4	112,156,69,644,	0,79845,86978,103300,
1	559212322	559297729	mdo_retrop30333.2	0	+	559212322	559297729	0	7	343,86,156,69,70,72,1842,	0,532,60110,67243,73473,82530,83565,
1	567735841	567737731	mdo_retrom30652.1	0	-	567735841	567737731	0	1	1890,	0,
1	585470614	585472045	mdo_retrom30778.0	0	-	585470614	585472045	0	1	1431,	0,
1	608090820	608092371	mdo_retrom30939.0	0	-	608090820	608092371	0	1	1551,	0,
1	610709691	610710634	mdo_retrom30962.0	0	-	610709691	610710634	0	1	943,	0,
1	613978118	613978941	mdo_retrop30695.0	0	+	613978118	613978941	0	1	823,	0,
1	614086384	614086745	mdoiretrom26368.0	0	-	614086384	614086745	0	2	318,42,	0,319,
1	620613064	620614536	mdo_retrop30736.0	0	+	620613064	620614536	0	1	1472,	0,
1	645396021	645397144	mdo_retrop30915.0	0	+	645396021	645397144	0	1	1123,	0,
1	648854406	648854781	mdo_retrom31260.0	0	-	648854406	648854781	0	1	375,	0,
1	661736683	661738115	mdo_retrom31347.0	0	-	661736683	661738115	0	1	1432,	0,
1	668458828	668459546	mdo_retrop31059.0	0	+	668458828	668459546	0	1	718,	0,
1	699264585	699264795	mdoiretrom26475.0	0	-	699264585	699264795	0	1	210,	0,
1	703616760	703617061	mdo_retrop31315.1	0	+	703616760	703617061	0	1	301,	0,
1	703616898	703617061	mdo_retrop31315.0	0	+	703616898	703617061	0	1	163,	0,
1	713225099	713225973	mdo_retrop31434.0	0	+	713225099	713225973	0	1	874,	0,
1	713272670	713274429	mdo_retrop31438.0	0	+	713272670	713274429	0	1	1759,	0,
1	714001316	714002298	mdo_retrop31459.0	0	+	714001316	714002298	0	2	629,145,	0,837,
1	714231892	714232896	mdo_retrop31468.0	0	+	714231892	714232896	0	1	1004,	0,
1	714678910	714682588	mdo_retrom31814.0	0	-	714678910	714682588	0	3	1801,99,137,	0,2948,3541,
1	714708348	714718904	mdo_retrop31496.2	0	+	714708348	714718904	0	2	99,5988,	0,4568,
2	1755464	1757938	mdo_retrop21291.0	0	+	1755464	1757938	0	1	2474,	0,
2	11419936	11420638	mdo_retrom21629.0	0	-	11419936	11420638	0	1	702,	0,
2	33480026	33483600	mdo_retrop21431.0	0	+	33480026	33483600	0	1	3574,	0,
2	52595579	52596514	mdoiretrop20333.0	0	+	52595579	52596514	0	1	935,	0,
2	71058914	71060683	mdo_retrom21932.0	0	-	71058914	71060683	0	1	1769,	0,
2	71547039	71547399	mdo_retrop21647.0	0	+	71547039	71547399	0	1	360,	0,
2	75934350	75936072	mdo_retrom21959.0	0	-	75934350	75936072	0	1	1722,	0,
2	81133811	81135144	mdo_retrom21985.0	0	-	81133811	81135144	0	1	1333,	0,
2	101063514	101064707	mdo_retrom22191.0	0	-	101063514	101064707	0	1	1193,	0,
2	105581038	105582469	mdoiretrom20127.0	0	-	105581038	105582469	0	1	1431,	0,
2	105758038	105758539	mdo_retrom22227.0	0	-	105758038	105758539	0	1	501,	0,
2	154588305	154588948	mdo_retrom22589.0	0	-	154588305	154588948	0	1	643,	0,
2	156554413	156556973	mdo_retrop22277.0	0	+	156554413	156556973	0	1	2560,	0,
2	160483314	160499950	mdoiretrop21616.0	0	+	160483314	160499950	0	3	1445,59,3394,	0,3286,13242,
2	180369140	180371416	mdoiretrom21894.1	0	-	180369140	180371416	0	1	2276,	0,
2	180369685	180371414	mdoiretrom21894.0	0	-	180369685	180371414	0	1	1729,	0,
2	181625726	181626574	mdo_retrom22825.0	0	-	181625726	181626574	0	1	848,	0,
2	181914239	181915290	mdo_retrop22500.0	0	+	181914239	181915290	0	1	1051,	0,
2	185967119	185968775	mdoiretrop20493.0	0	+	185967119	185968775	0	1	1656,	0,
2	190928507	190936871	mdo_retrom22905.1	0	-	190928507	190936871	0	2	3266,113,	0,8251,
2	190929041	190936853	mdo_retrom22905.0	0	-	190929041	190936853	0	2	2732,95,	0,7717,
2	204601978	204602190	mdoiretrom21259.0	0	-	204601978	204602190	0	1	212,	0,
2	204841004	204841498	mdo_retrom22988.0	0	-	204841004	204841498	0	1	494,	0,
2	207312312	207314534	mdo_retrop22662.1	0	+	207312312	207314534	0	1	2222,	0,
2	207312349	207314534	mdo_retrop22662.0	0	+	207312349	207314534	0	1	2185,	0,
2	229855859	229856516	mdoiretrop22255.0	0	+	229855859	229856516	0	1	657,	0,
2	233153263	233153988	mdo_retrom23270.0	0	-	233153263	233153988	0	1	725,	0,
2	236499039	236499213	mdoiretrop20584.0	0	+	236499039	236499213	0	1	174,	0,
2	242057444	242063468	mdoiretrom24082.1	0	-	242057444	242063468	0	5	816,36,79,46,39,	0,2013,3131,5293,5985,
2	242057444	242063468	mdoiretrom24082.2	0	-	242057444	242063468	0	4	816,36,46,39,	0,2013,5293,5985,
2	242057452	242058316	mdoiretrom24082.0	0	-	242057452	242058316	0	1	864,	0,
2	251507824	251509367	mdo_retrop23217.0	0	-	251507824	251509367	0	1	1543,	0,
2	251507824	251509367	mdo_retrop23217.0	0	-	251507824	251509367	0	1	1543,	0,
2	253694472	253694553	mdoiretrom23528.0	0	-	253694472	253694553	0	1	81,	0,
2	259218997	259219692	mdo_retrom23696.0	0	-	259218997	259219692	0	1	695,	0,
2	261101544	261102391	mdo_retrop23384.0	0	+	261101544	261102391	0	1	847,	0,
2	261853284	261854152	mdoiretrop21313.0	0	+	261853284	261854152	0	1	868,	0,
2	267981434	267985219	mdo_retrom23876.0	0	-	267981434	267985219	0	1	3785,	0,
2	267983209	267987119	mdo_retrop23508.0	0	+	267983209	267987119	0	2	56,1613,	0,2297,
2	279352589	279357869	mdo_retrom23968.1	0	-	279352589	279357869	0	2	1831,92,	0,5188,
2	279352589	279358524	mdo_retrom23968.0	0	-	279352589	279358524	0	3	1831,94,78,	0,5188,5857,
2	285006446	285008342	mdo_retrop23678.0	0	-	285006446	285008342	0	1	1896,	0,
2	355841598	355844746	mdo_retrom24755.0	0	-	355841598	355844746	0	1	3148,	0,
2	360488244	360491880	mdo_retrop24405.0	0	+	360488244	360491880	0	1	3636,	0,
2	370124047	370125788	mdo_retrop24506.1	0	+	370124047	370125788	0	1	1741,	0,
2	370124496	370125788	mdo_retrop24506.0	0	+	370124496	370125788	0	1	1292,	0,
2	370133953	370134270	mdo_retrop24507.0	0	+	370133953	370134270	0	1	317,	0,
2	371778639	371778944	mdo_retrop24517.0	0	+	371778639	371778944	0	1	305,	0,
2	381928940	381929212	mdo_retrop24589.0	0	+	381928940	381929212	0	1	272,	0,
2	384795328	384802241	mdo_retrom25029.0	0	-	384795328	384802241	0	4	1849,79,40,1025,	0,2544,3688,5888,
2	384795333	384802241	mdo_retrom25029.2	0	-	384795333	384802241	0	4	1844,97,40,657,	0,2539,3683,6251,
2	384795334	384802241	mdo_retrom25029.1	0	-	384795334	384802241	0	4	1843,79,40,657,	0,2538,3682,6250,
2	387803093	387803444	mdo_retrop24648.0	0	+	387803093	387803444	0	1	351,	0,
2	393165094	393166171	mdo_retrom25119.0	0	-	393165094	393166171	0	1	1077,	0,
2	414142338	414148634	mdo_retrom25300.0	0	-	414142338	414148634	0	2	1944,86,	0,6210,
2	418390667	418392186	mdoiretrom21606.1	0	-	418390667	418392186	0	1	1519,	0,
2	418390796	418392186	mdoiretrom21606.0	0	-	418390796	418392186	0	1	1390,	0,
2	424201133	424202358	mdo_retrop24922.1	0	+	424201133	424202358	0	2	117,758,	0,467,
2	424201133	424203619	mdo_retrop24922.0	0	+	424201133	424203619	0	2	117,2019,	0,467,
2	425394025	425394502	mdo_retrom25405.0	0	-	425394025	425394502	0	1	477,	0,
2	441397255	441399322	mdo_retrom25495.0	0	-	441397255	441399322	0	1	2067,	0,
2	454322361	454322913	mdo_retrom25559.0	0	-	454322361	454322913	0	2	363,187,	0,365,
2	471582683	471583169	mdo_retrop25213.0	0	+	471582683	471583169	0	1	486,	0,
2	486177278	486178097	mdoiretrom23783.0	0	-	486177278	486178097	0	1	819,	0,
2	515113249	515113500	mdo_retrom25948.1	0	+	515113249	515113500	0	1	251,	0,
2	515113256	515113761	mdo_retrom25948.0	0	-	515113256	515113761	0	1	505,	0,
2	515113256	515113761	mdo_retrom25948.0	0	-	515113256	515113761	0	1	505,	0,
2	515113256	515113761	mdo_retrop25487.0	0	-	515113256	515113761	0	1	505,	0,
2	515113256	515113761	mdo_retrop25487.0	0	-	515113256	515113761	0	1	505,	0,
2	515144390	515144884	mdo_retrop25488.0	0	-	515144390	515144884	0	1	494,	0,
2	515144390	515144884	mdo_retrop25488.0	0	-	515144390	515144884	0	1	494,	0,
2	515437302	515438948	mdo_retrop25490.1	0	-	515437302	515438948	0	1	1646,	0,
2	515437302	515438948	mdo_retrop25490.1	0	-	515437302	515438948	0	1	1646,	0,
2	515437303	515438268	mdo_retrop25490.0	0	+	515437303	515438268	0	1	965,	0,
2	516072298	516081846	mdo_retrom25954.0	0	-	516072298	516081846	0	4	2069,142,1240,337,	0,3596,5122,9211,
2	522260731	522267644	mdo_retrop25519.0	0	+	522260731	522267644	0	2	44,3794,	0,3119,
2	522382083	522382787	mdo_retrom25983.0	0	-	522382083	522382787	0	1	704,	0,
2	528972222	528997548	mdo_retrop25563.0	0	+	528972222	528997548	0	2	400,3592,	0,21734,
2	530384723	530385839	mdoiretrom20979.0	0	-	530384723	530385839	0	1	1116,	0,
2	530486659	530488249	mdoiretrop20270.0	0	+	530486659	530488249	0	1	1590,	0,
2	538751270	538756744	mdo_retrom26098.0	0	-	538751270	538756744	0	1	5474,	0,
3	1882964	1883583	mdoiretrop16452.0	0	+	1882964	1883583	0	1	619,	0,
3	1882968	1883556	mdoiretrop16452.1	0	+	1882968	1883556	0	1	588,	0,
3	11527688	11566491	mdo_retrop16752.0	0	+	11527688	11566491	0	3	379,151,4500,	0,30071,34303,
3	16796671	16798526	mdo_retrop16778.0	0	+	16796671	16798526	0	1	1855,	0,
3	18703328	18703911	mdo_retrop16791.0	0	+	18703328	18703911	0	1	583,	0,
3	19315733	19322411	mdo_retrop16799.1	0	+	19315733	19322411	0	2	576,191,	0,6487,
3	19315916	19316306	mdo_retrop16799.0	0	+	19315916	19316306	0	1	390,	0,
3	33781726	33785277	mdo_retrop16926.0	0	+	33781726	33785277	0	1	3551,	0,
3	42628906	42629589	mdo_retrop17023.0	0	+	42628906	42629589	0	1	683,	0,
3	56021274	56021814	mdo_retrop17161.0	0	+	56021274	56021814	0	1	540,	0,
3	63983805	63983998	mdo_retrop17221.0	0	+	63983805	63983998	0	1	193,	0,
3	75605036	75627269	mdo_retrop17293.0	0	+	75605036	75627269	0	2	670,2956,	0,19277,
3	86450842	86451824	mdo_retrop17405.0	0	+	86450842	86451824	0	1	982,	0,
3	97906452	97934997	mdoiretrom17091.0	0	-	97906452	97934997	0	2	232,238,	0,28307,
3	108531508	108531871	mdoiretrom16367.0	0	-	108531508	108531871	0	1	363,	0,
3	109203742	109205339	mdo_retrom17770.0	0	-	109203742	109205339	0	1	1597,	0,
3	117331342	117333580	mdo_retrop17647.0	0	+	117331342	117333580	0	2	809,863,	0,1375,
3	136871667	136873071	mdo_retrop17921.0	0	+	136871667	136873071	0	1	1404,	0,
3	143750922	143754935	mdo_retrop17962.0	0	+	143750922	143754935	0	1	4013,	0,
3	150468742	150469046	mdo_retrop18053.0	0	+	150468742	150469046	0	1	304,	0,
3	154411150	154412523	mdoiretrop16592.0	0	+	154411150	154412523	0	1	1373,	0,
3	159829288	159832840	mdoiretrop15857.1	0	+	159829288	159832840	0	1	3552,	0,
3	178587467	178588587	mdo_retrom18501.0	0	-	178587467	178588587	0	1	1120,	0,
3	186831487	186831715	mdoiretrop16623.0	0	+	186831487	186831715	0	1	228,	0,
3	202350716	202351435	mdoiretrop18004.0	0	+	202350716	202351435	0	1	719,	0,
3	204822431	204823104	mdo_retrom18718.0	0	-	204822431	204823104	0	1	673,	0,
3	206706835	206707337	mdo_retrom18746.0	0	-	206706835	206707337	0	1	502,	0,
3	211454732	211454891	mdo_retrom18791.0	0	-	211454732	211454891	0	1	159,	0,
3	213504807	213507777	mdo_retrom18810.0	0	-	213504807	213507777	0	1	2970,	0,
3	213504807	213519420	mdo_retrom18810.1	0	-	213504807	213519420	0	2	2956,391,	0,14222,
3	227949131	227949353	mdoiretrop17583.0	0	+	227949131	227949353	0	1	222,	0,
3	252069697	252069988	mdo_retrop18941.0	0	+	252069697	252069988	0	1	291,	0,
3	256168950	256170137	mdo_retrom19157.0	0	-	256168950	256170137	0	1	1187,	0,
3	272787461	272789902	mdo_retrop19087.0	0	+	272787461	272789902	0	1	2441,	0,
3	277833707	277835042	mdoiretrom17279.0	0	-	277833707	277835042	0	1	1335,	0,
3	291506717	291514007	mdo_retrop19256.0	0	+	291506717	291514007	0	1	7290,	0,
3	302771203	302772084	mdo_retrom19643.0	0	-	302771203	302772084	0	1	881,	0,
3	305758595	305759762	mdo_retrop19415.0	0	+	305758595	305759762	0	1	1167,	0,
3	313351502	313352600	mdo_retrom19724.0	0	-	313351502	313352600	0	1	1098,	0,
3	329193783	329194046	mdo_retrop19580.0	0	+	329193783	329194046	0	1	263,	0,
3	343307919	343346438	mdo_retrom19986.0	0	-	343307919	343346438	0	12	2318,150,78,558,91,77,150,229,138,154,218,61,	0,6721,8521,10799,15500,17410,19873,23215,25484,28727,36278,38458,
3	353723527	353724042	mdoiretrop16765.0	0	+	353723527	353724042	0	1	515,	0,
3	367457663	367559911	mdoiretrom17953.0	0	-	367457663	367559911	0	4	4362,106,397,160,	0,8186,26191,102088,
3	367457663	367861567	mdoiretrom17953.1	0	-	367457663	367861567	0	5	4362,106,397,81,39,	0,8186,26191,232237,403865,
3	369750346	369750541	mdoiretrom17372.0	0	-	369750346	369750541	0	1	195,	0,
3	386334803	386336050	mdo_retrop20034.1	0	-	386334803	386336050	0	1	1247,	0,
3	386334803	386336050	mdo_retrop20034.1	0	-	386334803	386336050	0	1	1247,	0,
3	386334808	386335155	mdo_retrop20034.0	0	+	386334808	386335155	0	1	347,	0,
3	386334808	386335155	mdo_retrop20034.0	0	+	386334808	386335155	0	1	347,	0,
3	392299843	392305204	mdo_retrom20393.0	0	-	392299843	392305204	0	2	1897,40,	0,5321,
3	392299843	392305204	mdo_retrom20393.1	0	-	392299843	392305204	0	2	1897,44,	0,5317,
3	392595780	392596394	mdo_retrom20397.0	0	-	392595780	392596394	0	1	614,	0,
3	395831613	395832445	mdo_retrop20097.0	0	+	395831613	395832445	0	1	832,	0,
3	395831615	395832419	mdo_retrop20097.1	0	+	395831615	395832419	0	1	804,	0,
3	419169365	419170504	mdoiretrop15978.0	0	+	419169365	419170504	0	1	1139,	0,
3	421665075	421673108	mdoiretrom17423.0	0	-	421665075	421673108	0	2	1017,1173,	0,6860,
3	422572751	422572953	mdoiretrop18623.0	0	+	422572751	422572953	0	1	202,	0,
3	429143521	429145337	mdo_retrom20698.0	0	-	429143521	429145337	0	1	1816,	0,
3	434366061	434366494	mdo_retrop20423.0	0	+	434366061	434366494	0	1	433,	0,
3	439220278	439223973	mdoiretrom16569.0	0	-	439220278	439223973	0	2	1805,746,	0,2949,
3	455667690	455667890	mdoiretrom19409.0	0	-	455667690	455667890	0	1	200,	0,
3	478411287	478413331	mdo_retrop20712.0	0	+	478411287	478413331	0	1	2044,	0,
3	486995538	487004980	mdo_retrop20782.0	0	+	486995538	487004980	0	3	2804,290,2945,	0,5309,6497,
3	503646228	503646806	mdoiretrop19272.0	0	+	503646228	503646806	0	1	578,	0,
3	513223880	513241553	mdo_retrop21021.0	0	+	513223880	513241553	0	2	332,1554,	0,16119,
3	513831520	513952442	mdoiretrop18789.0	0	+	513831520	513952442	0	3	574,1350,2152,	0,53019,118770,
4	654734	655865	mdoiretrom14010.0	0	-	654734	655865	0	1	1131,	0,
4	2855547	2857280	mdo_retrom13168.0	0	-	2855547	2857280	0	1	1733,	0,
4	13532939	13534500	mdo_retrom13271.0	0	-	13532939	13534500	0	1	1561,	0,
4	32081588	32083816	mdo_retrop13185.0	0	+	32081588	32083816	0	1	2228,	0,
4	48326093	48337896	mdo_retrom13616.0	0	-	48326093	48337896	0	2	691,406,	0,11397,
4	61572913	61575048	mdo_retrop13483.0	0	+	61572913	61575048	0	1	2135,	0,
4	67028534	67030281	mdoiretrom13616.0	0	-	67028534	67030281	0	1	1747,	0,
4	105013850	105014422	mdo_retrop13787.0	0	+	105013850	105014422	0	1	572,	0,
4	105027737	105028309	mdo_retrom14037.0	0	-	105027737	105028309	0	1	572,	0,
4	108379818	108381234	mdo_retrom14078.0	0	-	108379818	108381234	0	1	1416,	0,
4	113989117	114014268	mdo_retrop13862.0	0	+	113989117	114014268	0	2	85,1298,	0,23853,
4	113989117	114014268	mdo_retrop13862.1	0	+	113989117	114014268	0	2	85,1298,	0,23853,
4	115959705	115960642	mdoiretrom14593.0	0	-	115959705	115960642	0	1	937,	0,
4	133802438	133802579	mdo_retrop14009.0	0	+	133802438	133802579	0	1	141,	0,
4	138741255	138743267	mdoiretrop14658.0	0	+	138741255	138743267	0	1	2012,	0,
4	142757301	142757996	mdo_retrom14364.0	0	-	142757301	142757996	0	1	695,	0,
4	144958061	144958487	mdo_retrom14375.0	0	-	144958061	144958487	0	1	426,	0,
4	164069952	164070561	mdo_retrom14537.0	0	-	164069952	164070561	0	1	609,	0,
4	177754108	177756049	mdo_retrop14356.0	0	+	177754108	177756049	0	1	1941,	0,
4	184574802	184585790	mdo_retrop14397.0	0	+	184574802	184585790	0	2	82,993,	0,9995,
4	202340001	202347346	mdo_retrom14831.0	0	-	202340001	202347346	0	2	1247,235,	0,7110,
4	226504641	226506342	mdoiretrom15920.0	0	-	226504641	226506342	0	1	1701,	0,
4	237532367	237532884	mdo_retrom15152.0	0	-	237532367	237532884	0	1	517,	0,
4	241037160	241089144	mdo_retrom15174.0	0	-	241037160	241089144	0	6	375,105,52,115,170,212,	0,29004,46918,47070,48812,51772,
4	241037160	241089231	mdo_retrom15174.1	0	-	241037160	241089231	0	6	375,105,52,115,82,57,	0,29004,46918,47070,48812,52014,
4	243902118	243903390	mdo_retrop14917.1	0	+	243902118	243903390	0	1	1272,	0,
4	243902119	243903389	mdo_retrop14917.0	0	+	243902119	243903389	0	2	110,777,	0,493,
4	251837420	251838130	mdo_retrom15271.1	0	-	251837420	251838130	0	1	710,	0,
4	251837500	251838130	mdo_retrom15271.0	0	-	251837500	251838130	0	1	630,	0,
4	274003977	274008214	mdo_retrom15505.0	0	-	274003977	274008214	0	3	1139,65,351,	0,3608,3886,
4	289730491	289742976	mdoiretrom13192.0	0	-	289730491	289742976	0	2	9850,1253,	0,11232,
4	289741712	289742952	mdoiretrom13192.1	0	-	289741712	289742952	0	1	1240,	0,
4	318283540	318284578	mdo_retrop15531.0	0	+	318283540	318284578	0	1	1038,	0,
4	348702766	348704291	mdo_retrom16003.1	0	-	348702766	348704291	0	1	1525,	0,
4	349542194	349593542	mdoiretrop15472.0	0	+	349542194	349593542	0	4	44,257,82,1464,	0,3349,10803,49884,
4	352482660	352485890	mdoiretrom13350.0	0	-	352482660	352485890	0	1	3230,	0,
4	363432262	363449066	mdo_retrop15952.0	0	+	363432262	363449066	0	3	1651,302,3492,	0,6238,13312,
4	363434488	363449062	mdo_retrop15952.1	0	+	363434488	363449062	0	3	60,302,3488,	0,4012,11086,
4	364397312	364398092	mdo_retrop15960.0	0	+	364397312	364398092	0	1	780,	0,
4	376072209	376075457	mdo_retrom16322.0	0	-	376072209	376075457	0	1	3248,	0,
4	388059137	388060524	mdo_retrop16117.0	0	+	388059137	388060524	0	1	1387,	0,
4	388061737	388065425	mdo_retrop16118.1	0	+	388061737	388065425	0	3	1435,113,134,	0,1858,3554,
4	388061891	388065424	mdo_retrop16118.0	0	+	388061891	388065424	0	3	1281,113,133,	0,1704,3400,
4	399496801	399522342	mdo_retrom16462.0	0	-	399496801	399522342	0	6	7718,96,127,75,79,80,	0,12000,12669,13958,16571,25461,
4	401510276	401512839	mdo_retrom16490.0	0	-	401510276	401512839	0	1	2563,	0,
4	404992778	404994601	mdo_retrop16339.0	0	+	404992778	404994601	0	1	1823,	0,
4	405080943	405082827	mdo_retrop16345.0	0	+	405080943	405082827	0	1	1884,	0,
4	405094021	405095861	mdoiretrom16262.0	0	-	405094021	405095861	0	1	1840,	0,
4	405277284	405281643	mdo_retrop16352.0	0	+	405277284	405281643	0	1	4359,	0,
4	406019012	406020915	mdoiretrop13055.0	0	+	406019012	406020915	0	1	1903,	0,
4	410083153	410083323	mdo_retrop16465.0	0	+	410083153	410083323	0	1	170,	0,
4	416234492	416245333	mdo_retrop16555.2	0	+	416234492	416245333	0	3	187,46,900,	0,426,9941,
4	416234495	416245331	mdo_retrop16555.0	0	+	416234495	416245331	0	4	184,46,117,586,	0,423,9938,10250,
4	416234497	416245330	mdo_retrop16555.1	0	+	416234497	416245330	0	3	182,46,585,	0,421,10248,
4	424129427	424132140	mdo_retrop16589.0	0	+	424129427	424132140	0	1	2713,	0,
4	425968939	425969197	mdo_retrom16788.0	0	-	425968939	425969197	0	1	258,	0,
5	25434986	25451065	mdo_retrom07982.0	0	-	25434986	25451065	0	2	1252,137,	0,15942,
5	25434986	25451067	mdo_retrom07982.1	0	-	25434986	25451067	0	2	1252,297,	0,15784,
5	50849434	50849607	mdoiretrom06729.0	0	-	50849434	50849607	0	1	173,	0,
5	52214510	52217351	mdo_retrom08205.0	0	-	52214510	52217351	0	1	2841,	0,
5	77111314	77112891	mdo_retrop08285.0	0	+	77111314	77112891	0	2	102,933,	0,644,
5	78322810	78327885	mdo_retrop08296.0	0	+	78322810	78327885	0	1	5075,	0,
5	79757942	79759365	mdo_retrom08521.0	0	-	79757942	79759365	0	1	1423,	0,
5	80613338	80614613	mdo_retrop08318.0	0	+	80613338	80614613	0	1	1275,	0,
5	81825413	81827109	mdo_retrop08328.0	0	+	81825413	81827109	0	1	1696,	0,
5	95200488	95200904	mdo_retrom08665.0	0	-	95200488	95200904	0	1	416,	0,
5	98051159	98056125	mdo_retrom08681.0	0	-	98051159	98056125	0	1	4966,	0,
5	101155683	101170628	mdo_retrom08716.0	0	-	101155683	101170628	0	2	1935,158,	0,14787,
5	142988191	142989676	mdo_retrom09037.0	0	-	142988191	142989676	0	1	1485,	0,
5	142988191	142989676	mdo_retrom09037.1	0	-	142988191	142989676	0	2	1193,185,	0,1300,
5	144011196	144012252	mdo_retrop08836.0	0	+	144011196	144012252	0	1	1056,	0,
5	144323844	144324917	mdo_retrop08838.0	0	+	144323844	144324917	0	1	1073,	0,
5	173075634	173076804	mdo_retrop09132.0	0	+	173075634	173076804	0	1	1170,	0,
5	176094565	176095235	mdo_retrom09388.0	0	-	176094565	176095235	0	1	670,	0,
5	202997018	202998141	mdo_retrom09637.0	0	-	202997018	202998141	0	2	179,749,	0,374,
5	225064973	225068249	mdoiretrom06829.0	0	-	225064973	225068249	0	2	209,1084,	0,2192,
5	225067115	225068248	mdoiretrom06829.1	0	-	225067115	225068248	0	1	1133,	0,
5	233257338	233259211	mdo_retrop09688.0	0	+	233257338	233259211	0	3	186,90,706,	0,494,1167,
5	233257338	233259211	mdo_retrop09688.0	0	+	233257338	233259211	0	3	186,90,706,	0,494,1167,
5	240282310	240282712	mdo_retrop09724.0	0	+	240282310	240282712	0	1	402,	0,
5	252750946	252751493	mdo_retrom09983.0	0	-	252750946	252751493	0	1	547,	0,
5	257406966	257408475	mdo_retrop09827.0	0	+	257406966	257408475	0	1	1509,	0,
5	260509926	260510366	mdoiretrom08494.0	0	-	260509926	260510366	0	1	440,	0,
5	276302770	276314107	mdo_retrop09939.0	0	+	276302770	276314107	0	2	19,1204,	0,10133,
5	302526371	302528474	mdo_retrop10359.0	0	+	302526371	302528474	0	1	2103,	0,
6	13957525	13961235	mdo_retrom05595.0	0	-	13957525	13961235	0	3	784,166,216,	0,2746,3494,
6	14539778	14549620	mdo_retrom05597.0	0	-	14539778	14549620	0	3	171,236,505,	0,3637,9337,
6	14548948	14549834	mdo_retrom05597.1	0	-	14548948	14549834	0	1	886,	0,
6	26371017	26375221	mdo_retrop05408.0	0	+	26371017	26375221	0	5	242,166,1079,563,131,	0,1518,1975,3196,4073,
6	29501021	29502335	mdo_retrop05430.0	0	+	29501021	29502335	0	1	1314,	0,
6	29635919	29637819	mdo_retrom05737.0	0	-	29635919	29637819	0	1	1900,	0,
6	30450218	30450405	mdoiretrom05299.0	0	-	30450218	30450405	0	1	187,	0,
6	31296828	31303901	mdo_retrop05443.0	0	+	31296828	31303901	0	2	207,1572,	0,5501,
6	48714868	48715910	mdo_retrop05660.0	0	+	48714868	48715910	0	1	1042,	0,
6	86049917	86051218	mdoiretrom05124.0	0	-	86049917	86051218	0	1	1301,	0,
6	86049984	86051692	mdoiretrom05124.1	0	-	86049984	86051692	0	2	874,49,	0,1659,
6	86049984	86051692	mdoiretrom05124.2	0	-	86049984	86051692	0	2	874,229,	0,1479,
6	86049984	86051692	mdoiretrom05124.3	0	-	86049984	86051692	0	2	874,324,	0,1384,
6	88562381	88563503	mdo_retrop05976.0	0	+	88562381	88563503	0	1	1122,	0,
6	88923640	88925389	mdo_retrom06278.0	0	-	88923640	88925389	0	1	1749,	0,
6	100183662	100185205	mdoiretrom05857.0	0	-	100183662	100185205	0	1	1543,	0,
6	128225371	128225718	mdo_retrom06585.1	0	-	128225371	128225718	0	1	347,	0,
6	147332238	147356368	mdoiretrop04819.0	0	+	147332238	147356368	0	5	870,366,92,130,8460,	0,5822,6931,7366,15670,
6	147336731	147356368	mdoiretrop04819.1	0	+	147336731	147356368	0	5	42,366,92,130,8460,	0,1329,2438,2873,11177,
6	169946194	169947178	mdo_retrop06627.0	0	+	169946194	169947178	0	1	984,	0,
6	193103438	193103603	mdoiretrop04873.0	0	+	193103438	193103603	0	1	165,	0,
6	193180374	193181805	mdo_retrom07116.0	0	-	193180374	193181805	0	1	1431,	0,
6	198356495	198358159	mdo_retrop06850.0	0	+	198356495	198358159	0	1	1664,	0,
6	201195815	201200539	mdo_retrop06865.0	0	+	201195815	201200539	0	1	4724,	0,
6	201260861	201264967	mdo_retrom07177.0	0	-	201260861	201264967	0	1	4106,	0,
6	204354826	204358254	mdo_retrop06886.0	0	+	204354826	204358254	0	2	142,2989,	0,439,
6	204354826	204358254	mdo_retrop06886.1	0	+	204354826	204358254	0	2	110,2989,	0,439,
6	211568150	211570353	mdoiretrop04902.0	0	+	211568150	211570353	0	1	2203,	0,
6	217857013	217858787	mdo_retrop06965.0	0	+	217857013	217858787	0	1	1774,	0,
6	223528280	223528424	mdo_retrom07277.0	0	-	223528280	223528424	0	1	144,	0,
6	253302812	253303845	mdo_retrom07458.0	0	-	253302812	253303845	0	1	1033,	0,
6	259708624	259708928	mdo_retrom07486.0	0	-	259708624	259708928	0	1	304,	0,
6	259708781	259708928	mdo_retrom07486.1	0	+	259708781	259708928	0	1	147,	0,
6	263417522	263418582	mdo_retrop07242.0	0	+	263417522	263418582	0	1	1060,	0,
6	268914995	268915250	mdo_retrop07309.0	0	+	268914995	268915250	0	1	255,	0,
6	272034099	272034946	mdo_retrop07332.0	0	+	272034099	272034946	0	1	847,	0,
6	285451623	285452344	mdo_retrop07395.0	0	+	285451623	285452344	0	1	721,	0,
6	291197541	291199532	mdo_retrom07692.0	0	-	291197541	291199532	0	1	1991,	0,
7	12073712	12077102	mdo_retrom03377.0	0	-	12073712	12077102	0	1	3390,	0,
7	36497199	36498223	mdo_retrop03297.0	0	+	36497199	36498223	0	1	1024,	0,
7	46189570	46190076	mdo_retrop03417.0	0	+	46189570	46190076	0	1	506,	0,
7	56817187	56818010	mdo_retrom03905.0	0	-	56817187	56818010	0	1	823,	0,
7	56835363	56989592	mdo_retrom03906.0	0	-	56835363	56989592	0	6	2433,103,55,163,88,220,	0,4289,8639,52109,138915,154009,
7	58766300	58868372	mdoiretrom04110.1	0	-	58766300	58868372	0	7	1849,107,108,75,180,137,163,	0,3331,4462,7397,16978,64736,101909,
7	58766302	58868361	mdoiretrom04110.0	0	-	58766302	58868361	0	7	1847,107,108,180,114,137,152,	0,3329,4460,16976,26335,64734,101907,
7	59109237	59110760	mdo_retrom03927.0	0	-	59109237	59110760	0	1	1523,	0,
7	69176491	69181497	mdo_retrop03667.0	0	+	69176491	69181497	0	1	5006,	0,
7	73941300	74020062	mdo_retrop03702.1	0	+	73941300	74020062	0	29	556,68,112,153,231,146,193,91,210,182,176,124,162,138,147,180,84,139,95,4429,168,93,191,139,105,146,274,335,2322,	0,22230,25359,26153,29801,30567,33360,38352,39488,41765,42034,42363,49626,50121,50337,53507,53773,55612,57777,58376,67663,68447,69660,70252,71944,72576,74469,74850,76440,
7	84098660	84101781	mdo_retrop03770.0	0	+	84098660	84101781	0	1	3121,	0,
7	84102597	84103920	mdo_retrop03771.0	0	+	84102597	84103920	0	1	1323,	0,
7	92762920	92763600	mdo_retrop03877.0	0	+	92762920	92763600	0	1	680,	0,
7	144471128	144472084	mdo_retrom04761.0	0	-	144471128	144472084	0	1	956,	0,
7	153625744	153625982	mdoiretrop03170.0	0	-	153625744	153625982	0	1	238,	0,
7	154611053	154611557	mdo_retrop04506.0	0	+	154611053	154611557	0	1	504,	0,
7	155012959	155016287	mdoiretrom03749.0	0	-	155012959	155016287	0	1	3328,	0,
7	159034325	159035713	mdo_retrop04541.0	0	+	159034325	159035713	0	1	1388,	0,
7	162990729	162991326	mdo_retrom04929.0	0	-	162990729	162991326	0	1	597,	0,
7	186774403	186774901	mdo_retrop04759.0	0	+	186774403	186774901	0	1	498,	0,
7	189672326	189674660	mdoiretrom04828.0	0	-	189672326	189674660	0	1	2334,	0,
7	190159242	190160328	mdo_retrop04782.0	0	+	190159242	190160328	0	1	1086,	0,
7	198241605	198243304	mdoiretrom04836.0	0	-	198241605	198243304	0	1	1699,	0,
7	210178613	210180421	mdo_retrom05215.0	0	-	210178613	210180421	0	1	1808,	0,
7	213915729	213917480	mdo_retrom05247.0	0	-	213915729	213917480	0	1	1751,	0,
7	232522485	232529473	mdo_retrop05004.0	0	+	232522485	232529473	0	2	304,1177,	0,5811,
7	240809843	240810598	mdo_retrom05402.0	0	-	240809843	240810598	0	1	755,	0,
7	248865878	248868910	mdo_retrom05444.0	0	-	248865878	248868910	0	1	3032,	0,
8	12950313	12958012	mdo_retrom10752.1	0	-	12950313	12958012	0	1	7699,	0,
8	14798365	14824309	mdo_retrop10475.0	0	+	14798365	14824309	0	8	168,141,111,140,173,112,2815,2327,	0,2566,14936,16184,18159,18560,19621,23617,
8	32419411	32420669	mdo_retrop10697.0	0	+	32419411	32420669	0	1	1258,	0,
8	36269097	36274683	mdoiretrop11347.0	0	+	36269097	36274683	0	2	92,2666,	0,2920,
8	64271416	64283034	mdo_retrom11276.0	0	-	64271416	64283034	0	3	506,349,82,	0,1752,11536,
8	65433154	65435292	mdo_retrom11284.0	0	-	65433154	65435292	0	1	2138,	0,
8	72010100	72011444	mdo_retrop11037.1	0	+	72010100	72011444	0	2	214,531,	0,813,
8	72010100	72012923	mdo_retrop11037.0	0	+	72010100	72012923	0	2	214,2010,	0,813,
8	76011713	76015099	mdoiretrom10096.1	0	-	76011713	76015099	0	1	3386,	0,
8	76012587	76015073	mdoiretrom10096.0	0	-	76012587	76015073	0	1	2486,	0,
8	79503710	79505520	mdo_retrop11114.0	0	+	79503710	79505520	0	1	1810,	0,
8	83712012	83712623	mdoiretrop11017.0	0	+	83712012	83712623	0	1	611,	0,
8	103942395	103943166	mdo_retrom11539.0	0	-	103942395	103943166	0	1	771,	0,
8	111752539	111753703	mdo_retrop11364.0	0	+	111752539	111753703	0	1	1164,	0,
8	121744740	121756743	mdoiretrom10596.0	0	-	121744740	121756743	0	2	1778,1431,	0,10572,
8	122528978	122531022	mdo_retrom11688.0	0	-	122528978	122531022	0	1	2044,	0,
8	123319940	123320766	mdo_retrop11450.0	0	-	123319940	123320766	0	1	826,	0,
8	123319940	123320766	mdo_retrop11450.0	0	-	123319940	123320766	0	1	826,	0,
8	124489804	124490451	mdo_retrom11714.0	0	-	124489804	124490451	0	1	647,	0,
8	126402419	126408953	mdo_retrop11479.0	0	+	126402419	126408953	0	1	6534,	0,
8	130110342	130111913	mdo_retrom11755.0	0	-	130110342	130111913	0	1	1571,	0,
8	130110342	130112111	mdo_retrom11755.1	0	-	130110342	130112111	0	1	1769,	0,
8	131432440	131432628	mdo_retrom11765.0	0	-	131432440	131432628	0	1	188,	0,
8	145783038	145783181	mdoiretrop09139.0	0	+	145783038	145783181	0	1	143,	0,
8	155923031	155924242	mdoiretrop11436.0	0	+	155923031	155924242	0	1	1211,	0,
8	158240104	158241267	mdo_retrom12020.0	0	-	158240104	158241267	0	1	1163,	0,
8	167259585	167261189	mdo_retrop11845.0	0	+	167259585	167261189	0	1	1604,	0,
8	170149760	170151348	mdo_retrom12143.1	0	-	170149760	170151348	0	1	1588,	0,
8	170149875	170151348	mdo_retrom12143.0	0	-	170149875	170151348	0	1	1473,	0,
8	180507706	180509063	mdo_retrom12226.0	0	-	180507706	180509063	0	1	1357,	0,
8	180512873	180515383	mdoiretrom11833.0	0	-	180512873	180515383	0	2	1043,136,	0,2374,
8	187552221	187552304	mdo_retrom12298.0	0	-	187552221	187552304	0	1	83,	0,
8	190890270	190892355	mdoiretrom11848.0	0	-	190890270	190892355	0	1	2085,	0,
8	196018472	196019439	mdoiretrop09866.0	0	+	196018472	196019439	0	1	967,	0,
8	209361136	209362153	mdo_retrop12248.0	0	+	209361136	209362153	0	1	1017,	0,
8	220938570	220939012	mdoiretrop09956.0	0	+	220938570	220939012	0	1	442,	0,
8	236238855	236241775	mdoiretrop10550.0	0	+	236238855	236241775	0	1	2920,	0,
8	262759506	262767091	mdo_retrop12637.0	0	+	262759506	262767091	0	1	7585,	0,
8	267140839	267142399	mdo_retrop12672.0	0	+	267140839	267142399	0	1	1560,	0,
8	267140857	267141605	mdo_retrop12672.1	0	+	267140857	267141605	0	1	748,	0,
8	293642033	293649220	mdo_retrop12835.0	0	+	293642033	293649220	0	2	93,1533,	0,5654,
8	293642399	293649220	mdo_retrop12835.1	0	+	293642399	293649220	0	2	63,1533,	0,5288,
8	298488748	298489581	mdo_retrom13058.0	0	-	298488748	298489581	0	1	833,	0,
8	305628338	305628760	mdo_retrop12889.0	0	+	305628338	305628760	0	1	422,	0,
8	311440591	311441376	mdo_retrop12928.0	0	+	311440591	311441376	0	1	785,	0,
8	311736954	311738134	mdo_retrop12930.0	0	+	311736954	311738134	0	1	1180,	0,
Un	16543680	16563466	mdo_retrop00789.0	0	+	16543680	16563466	0	2	243,1826,	0,17960,
Un	22459138	22467392	mdo_retrom00782.0	0	-	22459138	22467392	0	2	2757,4306,	0,3948,
Un	23989442	23990144	mdo_retrop00883.0	0	+	23989442	23990144	0	1	702,	0,
Un	27763682	27766526	mdo_retrop00918.0	0	+	27763682	27766526	0	2	146,2272,	0,572,
Un	27763682	27766526	mdo_retrop00918.1	0	+	27763682	27766526	0	2	146,2247,	0,597,
Un	27785732	27788645	mdoiretrop01762.0	0	+	27785732	27788645	0	2	96,1667,	0,1246,
Un	28331361	28332660	mdo_retrop00922.0	0	+	28331361	28332660	0	1	1299,	0,
Un	28596781	28598823	mdo_retrop00927.0	0	+	28596781	28598823	0	1	2042,	0,
Un	34692317	34694627	mdo_retrom00875.1	0	-	34692317	34694627	0	1	2310,	0,
Un	38606470	38607387	mdo_retrop01016.0	0	+	38606470	38607387	0	1	917,	0,
Un	38671938	38672416	mdo_retrom01023.0	0	-	38671938	38672416	0	1	478,	0,
Un	56822526	56825207	mdo_retrop01598.0	0	+	56822526	56825207	0	1	2681,	0,
Un	58258865	58260467	mdo_retrop01629.0	0	+	58258865	58260467	0	1	1602,	0,
Un	66546856	66547564	mdo_retrom02313.0	0	-	66546856	66547564	0	1	708,	0,
Un	66603554	66604892	mdoiretrop02476.0	0	+	66603554	66604892	0	1	1338,	0,
Un	70784393	70785281	mdo_retrom02416.0	0	-	70784393	70785281	0	1	888,	0,
Un	79103832	79104450	mdo_retrom02718.1	0	-	79103832	79104450	0	1	618,	0,
Un	96357534	96357879	mdo_retrop02842.0	0	+	96357534	96357879	0	1	345,	0,
X	4313856	4315900	mdo_retrop00032.0	0	+	4313856	4315900	0	1	2044,	0,
X	4504911	4508917	mdo_retrom00016.1	0	-	4504911	4508917	0	1	4006,	0,
X	4504921	4507323	mdo_retrom00016.0	0	-	4504921	4507323	0	1	2402,	0,
X	13799370	13805750	mdo_retrop00128.0	0	+	13799370	13805750	0	4	152,154,136,1915,	0,2781,3900,4465,
X	13802083	13805750	mdo_retrop00128.1	0	+	13802083	13805750	0	3	222,136,1915,	0,1187,1752,
X	15041147	15042441	mdo_retrom00102.0	0	-	15041147	15042441	0	1	1294,	0,
X	19854034	19855795	mdo_retrop00185.0	0	+	19854034	19855795	0	1	1761,	0,
X	23023395	23024072	mdo_retrom00200.0	0	-	23023395	23024072	0	1	677,	0,
X	23225071	23234097	mdo_retrom00202.0	0	-	23225071	23234097	0	2	4869,1048,	0,7978,
X	23531106	23549187	mdo_retrop00232.2	0	+	23531106	23549187	0	2	151,3942,	0,14139,
X	23796370	23800913	mdo_retrom00213.0	0	-	23796370	23800913	0	1	4543,	0,
X	24036782	24040617	mdo_retrom00217.0	0	-	24036782	24040617	0	1	3835,	0,
X	25966939	25968449	mdo_retrom00231.0	0	-	25966939	25968449	0	1	1510,	0,
X	29466092	29467845	mdo_retrop00286.0	0	+	29466092	29467845	0	1	1753,	0,
X	42789254	42800792	mdo_retrop00371.0	0	+	42789254	42800792	0	3	2147,60,366,	0,9779,11172,
X	46911694	46913218	mdo_retrom00341.0	0	-	46911694	46913218	0	1	1524,	0,
X	48154581	48156038	mdo_retrop00398.0	0	+	48154581	48156038	0	1	1457,	0,
X	48154581	48156038	mdo_retrop00398.1	0	+	48154581	48156038	0	1	1457,	0,
X	49876446	49878177	mdo_retrop00426.0	0	+	49876446	49878177	0	2	54,787,	0,944,
X	52845224	52846729	mdo_retrom00391.0	0	-	52845224	52846729	0	2	288,593,	0,912,
X	53444894	53447848	mdo_retrop00450.0	0	+	53444894	53447848	0	1	2954,	0,
X	53812724	53814583	mdo_retrom00399.0	0	-	53812724	53814583	0	1	1859,	0,
X	55034604	55037146	mdo_retrop00465.1	0	+	55034604	55037146	0	1	2542,	0,
X	55423758	55427171	mdo_retrom00408.0	0	-	55423758	55427171	0	1	3413,	0,
X	56184867	56185121	mdo_retrom00415.0	0	-	56184867	56185121	0	1	254,	0,
X	59754963	59758712	mdo_retrop00498.0	0	+	59754963	59758712	0	2	40,2437,	0,1312,
X	59755622	59758712	mdo_retrop00498.1	0	+	59755622	59758712	0	1	3090,	0,
X	61910056	61911639	mdo_retrop00521.0	0	+	61910056	61911639	0	1	1583,	0,
X	62409911	62411000	mdo_retrom00473.0	0	-	62409911	62411000	0	1	1089,	0,
X	63586045	63587007	mdo_retrom00480.0	0	-	63586045	63587007	0	1	962,	0,
X	63973245	63975702	mdo_retrom00482.1	0	-	63973245	63975702	0	1	2457,	0,
X	64275698	64278125	mdo_retrom00486.0	0	-	64275698	64278125	0	1	2427,	0,
X	65861851	65907391	mdo_retrop00546.0	0	+	65861851	65907391	0	3	71,57,2237,	0,35672,43303,
X	68182201	68183389	mdo_retrop00562.0	0	+	68182201	68183389	0	1	1188,	0,
X	69810989	69812585	mdo_retrop00572.0	0	+	69810989	69812585	0	1	1596,	0,
X	69948321	69956998	mdo_retrom00515.0	0	-	69948321	69956998	0	2	759,294,	0,8383,
X	74644445	74649464	mdo_retrom00547.0	0	-	74644445	74649464	0	1	5019,	0,
X	78641255	78658314	mdo_retrop00645.0	0	+	78641255	78658314	0	3	161,74,3363,	0,1790,13696,

## Sheet: Platypus
# Supplemental Table S11: Retrocopy transcripts in platypus (BED12 format)
Chromosome	Start	End	Transcript_ID	Score (not defined)	Strand	Thick Start (not defined)	Thick End (not defined)	Item_RGB (not defined)	Exon_count	Exon_sizes	Exon_starts
10	450333	451738	oan_retrom131171.0	0	-	450333	451738	0	1	1405,	0,
10	7590707	7621649	oaniretrop11805.0	0	+	7590707	7621649	0	3	59,669,4619,	0,10300,26323,
10	7601007	7621649	oaniretrop11805.1	0	+	7601007	7621649	0	2	669,4619,	0,16023,
12	10496361	10498510	oaniretrom11968.0	0	-	10496361	10498510	0	1	2149,	0,
2	9297099	9297423	oan_retrom129524.0	0	-	9297099	9297423	0	1	324,	0,
3	54139434	54269876	oan_retrop133053.0	0	+	54139434	54269876	0	3	510,1147,478,	0,1218,129964,
3	54139434	54269876	oan_retrop133053.1	0	+	54139434	54269876	0	3	510,1532,478,	0,833,129964,
4	32339138	32342019	oan_retrop133005.0	0	+	32339138	32342019	0	2	109,2670,	0,211,
4	32339314	32340093	oan_retrop133005.1	0	+	32339314	32340093	0	1	779,	0,
7	23132959	23193468	oan_retrop131877.1	0	+	23132959	23193468	0	2	829,608,	0,59901,
7	23133260	23193414	oan_retrop131877.0	0	+	23133260	23193414	0	2	528,554,	0,59600,
Contig12248	753	1788	oan_retrop20598.0	0	+	753	1788	0	1	1035,	0,
Contig12405	10794	11044	oaniretrom04596.0	0	-	10794	11044	0	1	250,	0,
Contig13	3947538	3949664	oaniretrom09786.0	0	-	3947538	3949664	0	1	2126,	0,
Contig13	5923797	5924272	oan_retrom128698.0	0	-	5923797	5924272	0	1	475,	0,
Contig13244	5202	6504	oan_retrom65879.0	0	-	5202	6504	0	1	1302,	0,
Contig13244	5202	6504	oan_retrom65879.1	0	-	5202	6504	0	1	1302,	0,
Contig13246	4932	6128	oan_retrom79213.0	0	-	4932	6128	0	3	168,162,244,	0,613,952,
Contig13492	10853	11468	oan_retrop52296.0	0	+	10853	11468	0	1	615,	0,
Contig142793	633	1667	oan_retrom09697.0	0	-	633	1667	0	1	1034,	0,
Contig14473	3322	4731	oan_retrop55395.0	0	+	3322	4731	0	1	1409,	0,
Contig1456	179070	204364	oan_retrop107037.2	0	+	179070	204364	0	17	1085,928,88,92,136,105,480,128,349,224,177,73,542,154,78,297,626,	0,4519,6842,7066,9082,9451,10002,10563,12024,13708,14660,15912,17199,20356,20669,24239,24668,
Contig14892	13149	13827	oan_retrop72203.1	0	+	13149	13827	0	1	678,	0,
Contig15042	5294	11856	oan_retrom69557.0	0	-	5294	11856	0	2	1890,45,	0,6517,
Contig16850	3938	4083	oaniretrop05060.0	0	+	3938	4083	0	1	145,	0,
Contig170756	699	1141	oan_retrop04876.0	0	+	699	1141	0	1	442,	0,
Contig17898	5161	6776	oan_retrop37550.0	0	+	5161	6776	0	1	1615,	0,
Contig20113	5956	6594	oan_retrop45880.0	0	+	5956	6594	0	1	638,	0,
Contig205796	14	763	oan_retrop00261.0	0	+	14	763	0	1	749,	0,
Contig25944	2962	3804	oan_retrom55179.1	0	-	2962	3804	0	1	842,	0,
Contig26148	2501	7406	oaniretrom04180.0	0	-	2501	7406	0	4	36,733,93,224,	0,1169,2378,4681,
Contig264088	79	251	oan_retrop02517.0	0	+	79	251	0	1	172,	0,
Contig26747	1935	2335	oan_retrom38776.0	0	-	1935	2335	0	1	400,	0,
Contig283641	44	549	oan_retrom00465.0	0	-	44	549	0	1	505,	0,
Contig28765	59	1203	oan_retrop25199.0	0	+	59	1203	0	1	1144,	0,
Contig3087	30518	33946	oan_retrop81589.0	0	+	30518	33946	0	1	3428,	0,
Contig34008	4602	6649	oan_retrom36574.0	0	-	4602	6649	0	1	2047,	0,
Contig3828	2776	31434	oan_retrop82600.0	0	+	2776	31434	0	16	139,147,174,84,139,95,4774,171,93,200,205,105,143,274,335,528,	0,222,2641,2916,3971,4929,5998,15042,15649,19808,22179,23817,24209,26916,27274,28130,
Contig3828	2778	31427	oan_retrop82600.1	0	+	2778	31427	0	16	137,147,174,84,139,95,97,171,93,200,205,105,143,274,335,521,	0,220,2639,2914,3969,4927,5996,15040,15647,19806,22177,23815,24207,26914,27272,28128,
Contig40576	972	1515	oan_retrom20148.0	0	-	972	1515	0	1	543,	0,
Contig43430	3946	4479	oaniretrop02384.0	0	+	3946	4479	0	1	533,	0,
Contig49866	391	1338	oan_retrom17075.0	0	-	391	1338	0	1	947,	0,
Contig6090	404	3806	oan_retrop74679.0	0	+	404	3806	0	2	28,1544,	0,1858,
Contig67345	65	1846	oan_retrom17703.0	0	-	65	1846	0	1	1781,	0,
Contig67345	65	1876	oan_retrom17703.1	0	-	65	1876	0	1	1811,	0,
Contig696	82146	88811	oan_retrop125959.0	0	+	82146	88811	0	2	58,1835,	0,4830,
Contig7199	7237	19994	oan_retrop71248.0	0	+	7237	19994	0	4	1173,207,185,2851,	0,2911,7165,9906,
Contig78727	2529	3258	oan_retrom16712.0	0	-	2529	3258	0	2	712,16,	0,713,
Contig819	16128	16501	oaniretrom07383.0	0	-	16128	16501	0	1	373,	0,
Contig83128	716	1856	oan_retrom12129.0	0	-	716	1856	0	1	1140,	0,
Contig83577	116	806	oan_retrop06356.0	0	+	116	806	0	1	690,	0,
Contig8433	6551	20672	oaniretrom05180.0	0	-	6551	20672	0	2	379,170,	0,13951,
Contig8748	23	2222	oan_retrom56357.0	0	-	23	2222	0	1	2199,	0,
Contig90949	10	571	oan_retrop06268.0	0	+	10	571	0	1	561,	0,
Contig9481	1156	3358	oan_retrom88909.0	0	-	1156	3358	0	1	2202,	0,
Ultra12	1975422	1976831	oan_retrom128494.0	0	-	1975422	1976831	0	1	1409,	0,
Ultra148	54528	55467	oaniretrom06956.0	0	-	54528	55467	0	1	939,	0,
Ultra178	316100	317295	oan_retrop126225.0	0	+	316100	317295	0	1	1195,	0,
Ultra178	330007	331252	oan_retrop126234.0	0	+	330007	331252	0	1	1245,	0,
Ultra212	18056	19496	oan_retrop119743.0	0	+	18056	19496	0	1	1440,	0,
Ultra272	299101	299442	oan_retrop131671.0	0	+	299101	299442	0	1	341,	0,
Ultra288	569912	580001	oan_retrom128591.0	0	-	569912	580001	0	2	4061,157,	0,9932,
Ultra288	1393298	1398966	oan_retrom128595.0	0	-	1393298	1398966	0	1	5668,	0,
Ultra32	1135457	1136484	oan_retrop127541.0	0	+	1135457	1136484	0	1	1027,	0,
Ultra337	3175363	3177225	oan_retrom129105.0	0	-	3175363	3177225	0	1	1862,	0,
Ultra408	566582	567115	oan_retrop126179.0	0	+	566582	567115	0	1	533,	0,
Ultra41	1103559	1105892	oan_retrom127499.2	0	-	1103559	1105892	0	1	2333,	0,
Ultra451	571466	571773	oan_retrop126208.0	0	+	571466	571773	0	1	307,	0,
Ultra519	7119560	7128144	oaniretrom10399.0	0	-	7119560	7128144	0	2	3699,72,	0,8512,
Ultra521	562087	577164	oaniretrom09488.0	0	-	562087	577164	0	3	4270,102,102,	0,5866,14975,
Ultra532	241976	244469	oan_retrop119631.0	0	+	241976	244469	0	1	2493,	0,
Ultra543	307823	308615	oan_retrom126855.0	0	-	307823	308615	0	1	792,	0,
Ultra56	9565119	9572453	oan_retrop131774.0	0	+	9565119	9572453	0	3	764,347,943,	0,2981,6391,
Ultra56	9566546	9572390	oan_retrop131774.1	0	+	9566546	9572390	0	3	99,347,880,	0,1554,4964,
Ultra693	750	10522	oaniretrop04765.0	0	+	750	10522	0	7	10,85,61,141,88,89,131,	0,3602,4909,5815,7181,8917,9641,
Ultra693	752	10431	oaniretrop04765.1	0	+	752	10431	0	7	8,85,61,141,88,89,40,	0,3600,4907,5813,7179,8915,9639,

## Sheet: Chicken
# Supplemental Table S11: Retrocopy transcripts in chicken (BED12 format)
Chromosome	Start	End	Transcript_ID	Score (not defined)	Strand	Thick Start (not defined)	Thick End (not defined)	Item_RGB (not defined)	Exon_count	Exon_sizes	Exon_starts
1	36768473	36783575	ggairetrop06424.0	0	+	36768473	36783575	0	3	415,137,5786,	0,1268,9316,
1	36774652	36783574	ggairetrop06424.1	0	+	36774652	36783574	0	2	280,5785,	0,3137,
1	45251432	45253359	gga_retrom38547.0	0	-	45251432	45253359	0	1	1927,	0,
1	47138033	47139371	ggairetrop05638.0	0	+	47138033	47139371	0	1	1338,	0,
1	64321920	64337541	ggairetrop06785.0	0	+	64321920	64337541	0	4	93,58,653,1166,	0,369,5999,14455,
1	136055917	136064341	ggairetrom06696.0	0	-	136055917	136064341	0	4	1742,107,108,492,	0,4679,6468,7932,
1	136055938	136076802	ggairetrom06696.1	0	-	136055938	136076802	0	8	1721,107,108,120,180,117,132,33,	0,4658,6447,7911,12163,15023,20270,20831,
1	136055938	136088631	ggairetrom06696.2	0	-	136055938	136088631	0	7	1721,107,108,180,117,132,292,	0,4658,6447,12163,15023,20270,32401,
10	1891944	1892550	gga_retrop26238.0	0	-	1891944	1892550	0	1	606,	0,
10	1892474	1893356	gga_retrop26238.1	0	+	1892474	1893356	0	1	882,	0,
11	3636549	3637136	ggairetrom02121.0	0	-	3636549	3637136	0	1	587,	0,
11	17428253	17430987	ggairetrom02117.1	0	-	17428253	17430987	0	3	1649,102,426,	0,1960,2308,
11	17429687	17430360	ggairetrom02117.0	0	-	17429687	17430360	0	2	215,147,	0,526,
13	14728525	14731316	gga_retrop25614.0	0	+	14728525	14731316	0	1	2791,	0,
14	4452831	4458054	gga_retrom34241.0	0	-	4452831	4458054	0	1	5223,	0,
15	8956916	9003316	ggairetrom01441.0	0	-	8956916	9003316	0	3	2059,1276,113,	0,26367,46287,
15	9078625	9088561	gga_retrom34034.0	0	-	9078625	9088561	0	2	1427,2027,	0,7909,
18	5632505	5634555	ggairetrop07140.0	0	+	5632505	5634555	0	1	2050,	0,
19	4212121	4215672	gga_retrop31095.0	0	+	4212121	4215672	0	1	3551,	0,
2	15314735	15321072	ggairetrop05118.0	0	+	15314735	15321072	0	3	364,450,721,	0,2050,5616,
2	15315940	15318240	ggairetrop05118.1	0	+	15315940	15318240	0	2	68,1455,	0,845,
20	10104724	10114446	ggairetrop01281.0	0	+	10104724	10114446	0	9	31,1439,102,123,119,114,106,179,3005,	0,1820,3834,4614,4840,5192,5960,6269,6717,
21	1234537	1235766	gga_retrom39838.0	0	-	1234537	1235766	0	1	1229,	0,
21	1236296	1237678	gga_retrom39850.0	0	-	1236296	1237678	0	1	1382,	0,
26	2327453	2332699	ggairetrop07623.0	0	+	2327453	2332699	0	2	116,1563,	0,3683,
3	59493662	59496480	ggairetrop04656.0	0	+	59493662	59496480	0	1	2818,	0,
3	103437074	103442254	ggairetrom04952.0	0	-	103437074	103442254	0	1	5180,	0,
3	104599248	104601492	gga_retrop28989.0	0	+	104599248	104601492	0	1	2244,	0,
4	1967376	1972012	gga_retrop28390.0	0	+	1967376	1972012	0	3	32,70,2266,	0,1103,2370,
4	1967376	1972012	gga_retrop28390.1	0	+	1967376	1972012	0	4	32,70,112,2054,	0,1103,2370,2582,
4	2229971	2243484	gga_retrom36736.0	0	-	2229971	2243484	0	5	1099,2700,71,140,11,	0,1513,6077,12827,13502,
4	57856121	58046733	gga_retrop28515.0	0	+	57856121	58046733	0	4	156,62,97,2110,	0,4242,149573,188502,
5	26434336	26437249	ggairetrom03548.1	0	-	26434336	26437249	0	2	2607,57,	0,2856,
5	26434336	26437303	ggairetrom03548.0	0	-	26434336	26437303	0	2	2607,111,	0,2856,
5	26434336	26441098	ggairetrom03548.2	0	-	26434336	26441098	0	3	2607,59,813,	0,2856,5949,
5	55410561	55412117	gga_retrom35658.0	0	-	55410561	55412117	0	1	1556,	0,
5	60273590	60276952	gga_retrop27561.0	0	+	60273590	60276952	0	1	3362,	0,
7	23755859	23763517	ggairetrop03163.0	0	+	23755859	23763517	0	3	50,312,782,	0,236,6876,
9	3552383	3566313	gga_retrop26346.0	0	+	3552383	3566313	0	6	988,185,119,189,189,4940,	0,4886,5983,7089,7688,8990,
