# Supplementary material for: The life history of retrocopies illuminates the evolution of new mammalian genes
Source: HighWire-hosted journal article supplement (doi:10.1101/gr.198473.115), 2016-01-04
Supplement: Supplemental_Tables.zip [file Supplemental_Table_S12.xlsx]

## Sheet: Human
# Supplemental Table S12: alternative isoform usage in human retrogenes
retro_ID	alternative isoform detection method
hsa_retrop27767	DEXSeq
hsa_retrop42534	cufflinks
hsa_retrom28536	DEXSeq
hsa_retrom36198	cufflinks
hsa_retrom24471	cufflinks
hsa_retrop13389	cufflinks
hsa_retrom24456	DEXSeq
hsa_retrop21162	DEXSeq
hsa_retrom29080	cufflinks; DEXSeq
hsa_retrop09455	DEXSeq
hsairetrop24499	DEXSeq
hsa_retrom15613	cufflinks
hsairetrop03487	cufflinks
hsa_retrop16929	cufflinks
hsa_retrop12913	cufflinks; DEXSeq
hsairetrom39463	cufflinks
hsa_retrom14133	DEXSeq
hsa_retrom26906	cufflinks
hsa_retrop05893	DEXSeq
hsa_retrop27887	DEXSeq
hsa_retrom30127	cufflinks
hsairetrop37208	cufflinks
hsa_retrom34525	cufflinks
hsa_retrom28363	DEXSeq
hsa_retrop43672	cufflinks
hsa_retrom31396	DEXSeq
hsa_retrom28645	DEXSeq
hsa_retrom22262	DEXSeq
hsa_retrop43829	cufflinks
hsa_retrom39045	DEXSeq
hsa_retrom24569	DEXSeq
hsa_retrom35168	DEXSeq
hsa_retrop34562	DEXSeq
hsa_retrop24944	cufflinks
hsa_retrom38978	cufflinks
hsa_retrop11436	cufflinks
hsa_retrop25540	cufflinks
hsa_retrop24754	DEXSeq
hsa_retrom40747	cufflinks
hsa_retrom01308	cufflinks
hsa_retrom04289	DEXSeq
hsa_retrom14678	DEXSeq
hsa_retrom14185	cufflinks
hsa_retrop42608	cufflinks
hsairetrom11641	DEXSeq
hsa_retrop10427	DEXSeq
hsa_retrop16833	cufflinks

## Sheet: Chimpanzee
# Supplemental Table S12: alternative isoform usage in chimpanzee retrogenes
retro_ID	alternative isoform detection method
ptr_retrop08387	DEXSeq
ptriretrop18583	DEXSeq
ptr_retrom02159	cufflinks
ptr_retrom09260	cufflinks
ptriretrop04910	DEXSeq
ptriretrop17289	DEXSeq
ptriretrom32891	cufflinks
ptriretrop15155	cufflinks; DEXSeq
ptr_retrom09818	cufflinks
ptriretrom42025	DEXSeq
ptr_retrop04066	DEXSeq
ptriretrom34902	DEXSeq
ptriretrop33073	DEXSeq
ptr_retrop06968	cufflinks; DEXSeq
ptriretrom09033	cufflinks
ptriretrom36136	DEXSeq
ptriretrom10832	DEXSeq
ptr_retrop08743	DEXSeq
ptriretrom05050	DEXSeq
ptriretrop19829	DEXSeq
ptr_retrop07460	cufflinks
ptriretrom09369	DEXSeq
ptriretrop14592	DEXSeq
ptr_retrop07077	cufflinks
ptriretrop14867	DEXSeq
ptriretrop33779	DEXSeq
ptr_retrop04117	cufflinks; DEXSeq
ptr_retrom03320	cufflinks
ptriretrom10999	cufflinks
ptriretrom34871	cufflinks
ptriretrom33148	DEXSeq
ptr_retrom10996	DEXSeq

## Sheet: Gorilla
# Supplemental Table S12: alternative isoform usage in gorilla retrogenes
retro_ID	alternative isoform detection method
ggo_retrop02336	DEXSeq
ggo_retrop00922	cufflinks
ggo_retrop02583	DEXSeq
ggoiretrom16711	DEXSeq
ggo_retrop01597	DEXSeq
ggo_retrop01212	cufflinks
ggo_retrop01141	cufflinks
ggo_retrop01478	cufflinks
ggo_retrop01998	DEXSeq
ggo_retrom01757	DEXSeq
ggo_retrop04303	cufflinks
ggoiretrop01003	cufflinks; DEXSeq
ggo_retrop01498	DEXSeq
ggo_retrop01800	DEXSeq
ggo_retrom01554	cufflinks
ggo_retrop02001	DEXSeq
ggo_retrop04617	DEXSeq
ggoiretrom23748	cufflinks
ggoiretrom04923	cufflinks
ggo_retrop00958	cufflinks
ggoiretrom22658	cufflinks
ggoiretrom33742	cufflinks; DEXSeq
ggoiretrom17077	cufflinks
ggoiretrop22294	cufflinks; DEXSeq
ggo_retrop03964	DEXSeq
ggo_retrop00711	DEXSeq
ggo_retrop01506	DEXSeq
ggoiretrom34884	DEXSeq
ggo_retrom03775	cufflinks
ggo_retrom00307	DEXSeq
ggoiretrop09639	DEXSeq
ggoiretrom04467	cufflinks
ggo_retrop00676	cufflinks; DEXSeq
ggo_retrom00751	DEXSeq
ggoiretrom13088	DEXSeq
ggoiretrom36285	cufflinks
ggo_retrom04149	DEXSeq

## Sheet: Orangutan
# Supplemental Table S12: alternative isoform usage in orangutan retrogenes
retro_ID	alternative isoform detection method
ppy_retrop07402	DEXSeq
ppyiretrom04773	DEXSeq
ppy_retrom13860	DEXSeq
ppy_retrop15992	DEXSeq
ppy_retrom02272	DEXSeq
ppy_retrop14437	DEXSeq
ppyiretrop10566	cufflinks
ppy_retrom18366	DEXSeq
ppy_retrop18366	DEXSeq
ppy_retrom02856	DEXSeq
ppy_retrom00100	DEXSeq
ppy_retrop17116	DEXSeq
ppyiretrom34540	DEXSeq
ppy_retrom18655	DEXSeq
ppyiretrop08662	cufflinks
ppy_retrop06927	DEXSeq
ppy_retrom07904	DEXSeq
ppy_retrop07868	cufflinks
ppy_retrom11823	DEXSeq
ppy_retrom06951	DEXSeq
ppyiretrom40638	DEXSeq
ppy_retrom09850	DEXSeq
ppyiretrop20971	DEXSeq
ppyiretrom28681	cufflinks; DEXSeq
ppy_retrop13427	DEXSeq
ppy_retrom15638	DEXSeq
ppy_retrop10738	DEXSeq
ppy_retrom08940	DEXSeq
ppy_retrop14634	DEXSeq
ppyiretrop23634	DEXSeq
ppyiretrom27925	DEXSeq
ppy_retrom17624	DEXSeq
ppy_retrom08618	cufflinks
ppy_retrop12585	DEXSeq
ppyiretrop17378	DEXSeq
ppy_retrop11490	DEXSeq
ppyiretrom11959	cufflinks
ppy_retrom07579	DEXSeq
ppyiretrom11492	DEXSeq
ppy_retrom10693	DEXSeq
ppy_retrom18164	DEXSeq
ppy_retrom07635	cufflinks; DEXSeq
ppy_retrom16234	cufflinks; DEXSeq
ppyiretrop15925	DEXSeq
ppyiretrom03145	DEXSeq
ppyiretrop28749	DEXSeq
ppy_retrop09217	DEXSeq
ppyiretrom40932	DEXSeq
ppy_retrop13617	cufflinks; DEXSeq
ppy_retrom17160	DEXSeq
ppyiretrom34532	DEXSeq
ppy_retrop12944	DEXSeq
ppy_retrom12209	DEXSeq
ppy_retrom17022	DEXSeq
ppy_retrom11135	DEXSeq
ppy_retrop13793	cufflinks; DEXSeq
ppy_retrop08990	DEXSeq
ppyiretrom12923	cufflinks
ppy_retrop11186	DEXSeq
ppyiretrom28823	DEXSeq
ppy_retrop10563	DEXSeq
ppy_retrop19257	cufflinks; DEXSeq
ppyiretrom10178	DEXSeq
ppy_retrom10418	cufflinks; DEXSeq
ppyiretrom07059	DEXSeq

## Sheet: Macaque
# Supplemental Table S12: alternative isoform usage in macaque retrogenes
retro_ID	alternative isoform detection method
mmuiretrom18749	DEXSeq
mmu_retrop09478	cufflinks; DEXSeq
mmu_retrom23856	cufflinks
mmu_retrom10392	DEXSeq
mmu_retrop18406	DEXSeq
mmu_retrop13686	cufflinks
mmu_retrop18428	cufflinks; DEXSeq
mmu_retrop32916	cufflinks
mmu_retrop07924	DEXSeq
mmu_retrop32227	DEXSeq
mmu_retrom03815	DEXSeq
mmuiretrom29339	DEXSeq
mmu_retrop13721	DEXSeq
mmu_retrom17233	DEXSeq
mmu_retrom20589	DEXSeq
mmu_retrom33972	DEXSeq
mmuiretrom06988	cufflinks
mmu_retrom14788	cufflinks; DEXSeq
mmuiretrop20924	cufflinks
mmu_retrop10339	cufflinks
mmu_retrom22451	cufflinks
mmu_retrom31540	cufflinks
mmu_retrop09346	DEXSeq
mmu_retrop16318	DEXSeq
mmu_retrom32070	DEXSeq
mmuiretrom23008	cufflinks
mmu_retrom32458	DEXSeq
mmu_retrom30456	cufflinks; DEXSeq
mmu_retrop22019	DEXSeq
mmu_retrop24513	cufflinks
mmu_retrom07769	DEXSeq
mmu_retrop37288	cufflinks
mmu_retrop13476	cufflinks
mmuiretrop07301	DEXSeq
mmu_retrom23889	DEXSeq
mmu_retrom25709	DEXSeq
mmu_retrop38732	DEXSeq
mmu_retrop23548	DEXSeq
mmu_retrom17528	cufflinks
mmu_retrom04453	DEXSeq
mmu_retrop17936	cufflinks
mmu_retrom04059	cufflinks
mmuiretrop22320	DEXSeq
mmu_retrop32167	DEXSeq
mmu_retrop31483	DEXSeq
mmu_retrom32069	DEXSeq
mmu_retrom35198	DEXSeq
mmu_retrom26964	cufflinks
mmuiretrom32552	DEXSeq
mmu_retrop31670	DEXSeq
mmu_retrop18731	DEXSeq

## Sheet: Mouse
# Supplemental Table S12: alternative isoform usage in mouse retrogenes
retro_ID	alternative isoform detection method
mus_retrom79934	DEXSeq
mus_retrop52885	cufflinks
musiretrom36849	cufflinks; DEXSeq
musiretrom15167	cufflinks
mus_retrom124016	DEXSeq
mus_retrom97507	DEXSeq
mus_retrop101570	cufflinks; DEXSeq
mus_retrom65810	DEXSeq
mus_retrom100099	cufflinks
musiretrop03405	cufflinks
mus_retrom59026	DEXSeq
mus_retrop102165	cufflinks
mus_retrom98519	DEXSeq
mus_retrop74421	DEXSeq
mus_retrom124477	DEXSeq
mus_retrop91832	cufflinks
mus_retrom69527	cufflinks
mus_retrom46277	DEXSeq
mus_retrom40716	cufflinks
mus_retrop112192	cufflinks; DEXSeq
mus_retrop96943	DEXSeq
mus_retrom68722	cufflinks; DEXSeq
musiretrom14733	cufflinks
mus_retrop92564	cufflinks
mus_retrop92527	cufflinks
mus_retrom97891	cufflinks
mus_retrom43775	DEXSeq
musiretrom02814	DEXSeq
mus_retrop45787	DEXSeq
mus_retrop46040	DEXSeq
mus_retrop70539	cufflinks
musiretrop19621	cufflinks; DEXSeq
mus_retrom42698	DEXSeq
mus_retrom70091	DEXSeq
mus_retrop55007	DEXSeq
mus_retrom107587	DEXSeq
mus_retrop51942	cufflinks
mus_retrom62946	DEXSeq
musiretrom38462	DEXSeq
mus_retrom42758	DEXSeq
musiretrom21215	cufflinks
mus_retrop56772	cufflinks
mus_retrop95440	DEXSeq
mus_retrop101532	DEXSeq
musiretrop37999	cufflinks
mus_retrop91945	DEXSeq
musiretrop24940	cufflinks; DEXSeq
musiretrop30372	DEXSeq
mus_retrop45741	DEXSeq
mus_retrom124555	DEXSeq
mus_retrom66654	DEXSeq
musiretrom41190	DEXSeq
mus_retrop54154	DEXSeq
mus_retrop66867	DEXSeq
mus_retrom45614	DEXSeq
mus_retrom50473	DEXSeq
mus_retrom97581	DEXSeq
mus_retrop100895	cufflinks
mus_retrop93743	DEXSeq
mus_retrom99763	DEXSeq
mus_retrom100745	DEXSeq
mus_retrom50572	DEXSeq
mus_retrom96027	DEXSeq
mus_retrop73764	DEXSeq

## Sheet: Rat
# Supplemental Table S12: alternative isoform usage in rat retrogenes
retro_ID	alternative isoform detection method
rno_retrop01067	DEXSeq
rno_retrom05400	DEXSeq
rnoiretrop35160	DEXSeq
rnoiretrop18786	DEXSeq
rno_retrom04661	DEXSeq
rnoiretrop26842	DEXSeq
rno_retrom07386	DEXSeq
rno_retrom02257	DEXSeq
rnoiretrom01748	DEXSeq
rno_retrom04108	DEXSeq
rnoiretrop39111	DEXSeq
rnoiretrop50268	DEXSeq
rno_retrop01665	DEXSeq
rno_retrop00221	DEXSeq
rno_retrom07000	DEXSeq
rno_retrop02285	DEXSeq
rno_retrop00973	DEXSeq
rno_retrop00117	cufflinks
rnoiretrop25180	cufflinks
rnoiretrop16398	cufflinks
rno_retrom02648	DEXSeq
rno_retrom00425	DEXSeq
rno_retrom00583	DEXSeq
rnoiretrom04072	cufflinks
rno_retrom01656	DEXSeq
rno_retrom04192	DEXSeq
rno_retrom04443	cufflinks; DEXSeq
rnoiretrop44398	DEXSeq
rno_retrom02690	cufflinks
rnoiretrop41572	cufflinks
rnoiretrop23726	DEXSeq
rnoiretrop28917	DEXSeq
rno_retrop00448	cufflinks
rno_retrom05053	DEXSeq
rnoiretrom49964	DEXSeq
rno_retrom00565	DEXSeq
rno_retrom01991	cufflinks
rnoiretrop42635	DEXSeq
rno_retrom01825	cufflinks; DEXSeq
rnoiretrop34671	DEXSeq
rno_retrom06277	cufflinks; DEXSeq
rno_retrom06067	DEXSeq
rnoiretrop34812	DEXSeq
rnoiretrom24409	DEXSeq
rno_retrop01833	cufflinks
rno_retrop00105	cufflinks
rno_retrom02058	DEXSeq
rnoiretrop37794	DEXSeq
rno_retrop02322	cufflinks; DEXSeq
rno_retrom07502	DEXSeq
rnoiretrop02331	DEXSeq
rnoiretrop37512	DEXSeq
rno_retrom05517	cufflinks
rnoiretrop37116	DEXSeq
rno_retrom05410	DEXSeq

## Sheet: Opossum
# Supplemental Table S12: alternative isoform usage in opossum retrogenes
retro_ID	alternative isoform detection method
mdoiretrom04110	cufflinks
mdo_retrop20097	DEXSeq
mdo_retrop03877	DEXSeq
mdo_retrop11037	DEXSeq
mdo_retrop28487	DEXSeq
mdo_retrom20393	cufflinks
mdo_retrop00546	DEXSeq
mdoiretrop29815	cufflinks
mdo_retrom00016	DEXSeq
mdo_retrop09687	DEXSeq
mdo_retrop09688	DEXSeq
mdoiretrom20127	DEXSeq
mdo_retrop11450	cufflinks
mdo_retrom25119	DEXSeq
mdo_retrop17293	DEXSeq
mdo_retrop22662	cufflinks
mdo_retrom25954	DEXSeq
mdo_retrom23876	DEXSeq
mdo_retrom03906	DEXSeq
mdo_retrom12143	cufflinks
mdo_retrop15952	DEXSeq
mdoiretrop16592	DEXSeq
mdo_retrop09132	DEXSeq
mdoiretrom13192	cufflinks
mdoiretrop16452	cufflinks
mdo_retrop00498	cufflinks
mdo_retrom09037	cufflinks; DEXSeq
mdo_retrom03377	DEXSeq
mdo_retrom26098	DEXSeq
mdo_retrop30661	DEXSeq
mdoiretrom29674	cufflinks; DEXSeq
mdo_retrom00782	DEXSeq
mdo_retrop12835	cufflinks
mdoiretrom17953	cufflinks
mdo_retrop16555	cufflinks
mdo_retrom10752	DEXSeq
mdo_retrom25029	cufflinks; DEXSeq
mdo_retrop30333	cufflinks
mdoiretrom21894	cufflinks
mdo_retrop29131	cufflinks
mdoiretrom10096	cufflinks
mdo_retrop16339	DEXSeq
mdo_retrom22905	cufflinks
mdo_retrop16118	cufflinks
mdo_retrop22277	DEXSeq
mdoiretrom05124	cufflinks
mdo_retrom07982	cufflinks
mdo_retrop24922	DEXSeq

## Sheet: Platypus
# Supplemental Table S12: alternative isoform usage in platypus retrogenes
retro_ID	alternative isoform detection method
oan_retrop131877	cufflinks
oan_retrop133005	cufflinks
oan_retrom65879	cufflinks
oan_retrop131774	cufflinks
oan_retrop133053	cufflinks
oan_retrom17703	cufflinks
oaniretrop11805	cufflinks
oan_retrom79213	DEXSeq

## Sheet: Chicken
# Supplemental Table S12: alternative isoform usage in chicken retrogenes
retro_ID	alternative isoform detection method
gga_retrom34034	DEXSeq
ggairetrop05118	cufflinks
gga_retrop26238	cufflinks
ggairetrom06696	cufflinks
gga_retrom38547	DEXSeq
ggairetrom03548	cufflinks
ggairetrom02117	cufflinks
ggairetrop06424	cufflinks; DEXSeq
gga_retrom34241	DEXSeq
gga_retrop28390	cufflinks
