# Supplementary material for: The life history of retrocopies illuminates the evolution of new mammalian genes
Source: HighWire-hosted journal article supplement (doi:10.1101/gr.198473.115), 2016-01-04
Supplement: Supplemental_Tables.zip [file Supplemental_Table_S13.xlsx]

## Sheet: Sheet1
# Supplemental Table S13: expression levels of orphan retrogenes and outgroup parents
# Expression levels correspond to the median expression between all samples from each organ
# For the RNF113 gene, expression levels in therians correspond to the sum of the two orphan retrogenes
gene_name	species	annotated gene	Brain	Cerebellum	Heart	Kidney	Liver	Testis
DEM1	human	ENSG00000164002	1.74186	1.57671	0.769633	1.71085	2.5647	1.56516
DEM1	chimpanzee	ENSPTRG00000000592	1.8386	3.71098	1.81665	2.86288	4.93983	1.29015
DEM1	gorilla	ENSGGOG00000024174	2.83749	7.30906	3.99401	4.37284	6.21668	1.60177
DEM1	orangutan	ENSPPYG00000001487	4.82191	7.03301	4.8533	8.51748	9.24668	4.63977
DEM1	macaque	ENSMMUG00000020398	1.19411	2.25854	1.44917	1.01583	0.577922	0.401863
DEM1	mouse	ENSMUSG00000028629	2.78614	2.22398	1.59912	2.20294	1.93673	8.34986
DEM1	rat	ENSRNOG00000037432	1.7897	1.34547	1.04772	2.51085	3.96365	0.750192
DEM1_parent	opossum	ENSMODG00000010851	7.84736	5.54447	1.2824	2.4029	1.6039	0.786168
CNO	human	hsairetrop27282	3.60382	2.99992	3.39999	4.7467	5.28265	2.90404
CNO	chimpanzee	ptriretrop34174	6.82062	2.58761	3.60222	7.34658	6.54845	1.15844
CNO	gorilla	ENSGGOG00000007549	7.77955	6.84747	5.45897	5.78022	7.53272	3.80575
CNO	orangutan	ENSPPYG00000014580	7.91831	5.58014	5.79458	7.79208	8.01828	19.3859
CNO	macaque	mmuiretrom30172	4.41694	4.46898	6.60427	6.77295	7.65661	3.52431
CNO	mouse	ENSMUSG00000060708	5.42508	4.27563	4.5917	4.912	7.17141	8.16124
CNO	rat	rnoiretrop17251	9.61613	11.5947	9.10814	12.0161	17.8945	11.7136
CNO_parent	opossum	ENSMODG00000011923	6.71334	4.21638	15.3329	8.30064	11.0176	10.8324
CNO_parent	platypus	ENSOANG00000022358	15.0563	23.2432	33.0924	15.5108	27.837	8.82115
CNO_parent	chicken	ENSGALG00000013591	13.3106	14.3011	14.4645	28.9985	15.6744	9.73627
TRMT12	human	hsairetrop37208	3.35021	2.82531	3.11401	2.73559	2.19975	2.3473
TRMT12	chimpanzee	ptriretrop24479	5.30611	5.26475	4.80732	5.81119	4.9666	6.72007
TRMT12	gorilla	ggoiretrop20035	5.92686	4.90332	4.91897	5.96277	3.91298	4.84433
TRMT12	orangutan	ppyiretrop27845	4.62437	6.31376	5.32423	4.65943	4.28788	1.94709
TRMT12	macaque	mmuiretrop23105	5.11851	4.44505	4.64066	4.2833	2.51292	3.35186
TRMT12	mouse	musiretrop08845	1.33751	1.87876	1.40462	1.49043	1.23792	0.9229
TRMT12	rat	rnoiretrop24671	2.17647	1.63766	1.86091	2.06878	3.15772	3.69169
TRMT12_parent	platypus	ENSOANG00000009987	5.56902	4.61837	6.56015	3.94636	3.71927	15.8465
TRMT12_parent	chicken	ENSGALG00000006773	2.12989	2.12295	1.84689	2.39415	3.43321	0.995873
HYI	opossum	mdoiretrop26432	1.71002	3.1899	5.217	22.5345	48.9047	0.388501
HYI_parent	human	ENSG00000178922	17.7217	18.8507	16.524	65.7617	87.5947	7.05361
HYI_parent	chimpanzee	ENSPTRG00000000640	23.2849	17.3064	17.9209	55.4676	36.7649	1.99374
HYI_parent	gorilla	ENSGGOG00000012782	38.5883	133.661	77.69	153.598	172.582	21.3865
HYI_parent	orangutan	ENSPPYG00000001444	13.0806	20.9266	16.4083	37.8899	57.9593	16.6699
HYI_parent	macaque	ENSMMUG00000023675	16.5579	24.9996	28.5022	75.1381	108.211	5.94529
HYI_parent	mouse	ENSMUSG00000006395	5.31521	5.62599	3.7374	22.6743	47.5192	2.00944
HYI_parent	rat	ENSRNOG00000037518	4.45913	8.35782	40.4541	85.8743	363.414	0.940002
HYI_parent	chicken	ENSGALG00000010021	4.80776	3.04622	2.32792	22.3055	20.9834	3.62207
L2HGDH	opossum	mdoiretrom10096	0.976396	2.0954	8.20093	7.78984	7.90716	0.92083
L2HGDH_parent	human	ENSG00000087299	3.75405	4.1311	2.60319	10.1442	6.05576	3.36136
L2HGDH_parent	chimpanzee	ENSPTRG00000006329	2.59106	3.37659	5.66777	7.40047	3.12963	2.6547
L2HGDH_parent	gorilla	ENSGGOG00000003027	2.74322	2.72912	3.73735	6.74164	1.7603	1.18788
L2HGDH_parent	orangutan	ENSPPYG00000005800	2.94524	1.48401	2.01979	9.80637	2.40959	2.82563
L2HGDH_parent	macaque	ENSMMUG00000007468	2.41716	2.01704	5.74729	4.75911	3.05019	4.07927
L2HGDH_parent	mouse	ENSMUSG00000020988	4.35826	4.77889	14.3653	23.3703	24.8131	5.22945
L2HGDH_parent	rat	ENSRNOG00000004857	1.64471	1.34998	4.67366	3.94723	3.63058	3.49338
L2HGDH_parent	chicken	ENSGALG00000012282	3.67746	3.24768	5.04494	32.0426	20.2049	2.14162
ZNF830	human	ENSG00000198783	7.40083	5.40406	4.27177	4.82704	6.56754	6.57971
ZNF830	chimpanzee	ENSPTRG00000009007	8.06706	8.13327	6.9838	6.43805	12.3834	9.0496
ZNF830	orangutan	ENSPPYG00000008175	9.35138	8.73447	9.80805	10.1987	15.0449	10.8867
ZNF830	macaque	ENSMMUG00000006402	6.04242	5.43917	5.69945	6.07811	7.08894	9.26739
ZNF830	mouse	ENSMUSG00000046010	2.30244	3.1672	4.34556	4.90493	5.12036	13.5874
ZNF830	rat	ENSRNOG00000007578	6.09114	6.05548	10.2906	7.56412	10.1555	15.9261
ZNF830	opossum	ENSMODG00000019150	11.6768	11.7539	12.3525	13.2663	14.6109	11.8524
ZNF830_parent	chicken	ENSGALG00000013156	7.63689	9.89319	8.55258	6.31315	6.82962	9.68815
LCMT2	human	ENSG00000168806	2.87475	3.99566	1.64111	3.25424	3.16232	2.31855
LCMT2	chimpanzee	ENSPTRG00000030303	2.83739	2.72667	2.57713	2.77846	2.32538	2.01247
LCMT2	gorilla	ENSGGOG00000015142	2.30385	3.30656	1.54457	2.50482	2.55818	1.5992
LCMT2	orangutan	ENSPPYG00000006410	0.964091	2.30605	1.85944	2.02078	1.89346	2.05648
LCMT2	macaque	ENSMMUG00000017066	1.35208	1.29325	1.41077	2.02765	1.52771	1.37083
LCMT2	mouse	ENSMUSG00000074890	1.39881	2.0354	4.35282	4.37363	4.15066	0.922535
LCMT2	rat	ENSRNOG00000043002	1.27415	1.22715	2.52063	4.30148	4.50887	1.65556
LCMT2	opossum	ENSMODG00000017825	1.26655	3.70547	1.63941	1.37949	3.23712	0.39253
LCMT2_parent	chicken	ENSGALG00000017333	3.72371	7.7532	5.42699	5.29473	6.01802	5.74512
COMMD5	human	ENSG00000170619	8.85451	9.87923	7.49943	9.1396	10.7647	6.81125
COMMD5	chimpanzee	ENSPTRG00000020718	12.3437	4.94829	5.17078	10.5798	10.8988	2.50888
COMMD5	orangutan	ENSPPYG00000018995	14.7015	9.47106	7.61894	12.5432	13.0618	21.3727
COMMD5	macaque	ENSMMUG00000011549	6.17532	5.66591	9.01552	7.01814	15.6123	3.46702
COMMD5	mouse	ENSMUSG00000055041	6.89436	5.5649	5.75567	7.44861	8.52423	13.3926
COMMD5	rat	ENSRNOG00000004484	14.5657	15.0325	18.2195	28.7965	87.0178	10.6536
COMMD5_parent	chicken	ENSGALG00000008867	9.70236	8.06787	5.05842	12.4582	11.1399	5.59101
MARS2	human	ENSG00000247626	1.86287	2.34405	1.89355	2.5851	4.3157	1.05607
MARS2	gorilla	ENSGGOG00000034895	1.97704	1.98227	1.36226	1.29504	1.82874	1.11131
MARS2	orangutan	ENSPPYG00000013049	1.59661	1.36775	3.24038	2.26206	5.2	2.70742
MARS2	macaque	ENSMMUG00000023810	2.78363	3.20585	2.54395	2.5721	2.92652	2.28445
MARS2	mouse	ENSMUSG00000046994	1.73696	2.16115	3.74884	2.25206	1.21902	3.00446
MARS2	rat	ENSRNOG00000015648	3.75481	2.69287	4.80263	6.75987	2.74173	1.52061
MARS2	opossum	ENSMODG00000024604	3.79375	3.47745	4.21462	5.11313	3.91074	1.33198
MARS2_parent	chicken	ENSGALG00000004019	3.94897	3.72616	3.34147	5.47144	7.19269	5.23083
RNF113	human	ENSG00000125352+ENSG00000139797	5.92138	6.86218	4.55889	5.42158	8.41088	36.3818
RNF113	chimpanzee	ENSPTRG00000022231+ENSPTRG00000005987	14.3146	10.6801	6.36699	8.48448	12.7433	107.895
RNF113	gorilla	ENSGGOG00000002324+ENSGGOG00000023052	10.2234	15.3589	9.81427	9.97802	13.0412	33.3198
RNF113	orangutan	ENSPPYG00000020676+ENSPPYG00000005460	11.8263	8.97922	6.59838	7.72027	12.6702	10.8903
RNF113	macaque	ENSMMUG00000020223+ENSMMUG00000022250	8.20233	7.6353	7.22552	7.60359	9.13108	9.97475
RNF113	mouse	ENSMUSG00000036537+ENSMUSG00000045546	7.63305	5.65966	6.1888	6.55532	6.71161	38.6716
RNF113	rat	ENSRNOG00000034040+ENSRNOG00000011364	14.8505	11.8704	17.5589	23.9235	21.4915	4.84489
RNF113	platypus	ENSOANG00000002592	12.2733	10.059	10.8523	12.4275	11.6634	17.7234
RNF113_parent	chicken	ENSGALG00000000538	8.89364	7.89234	9.29572	7.17057	7.21236	50.1893
