# Supplementary material for: The life history of retrocopies illuminates the evolution of new mammalian genes
Source: HighWire-hosted journal article supplement (doi:10.1101/gr.198473.115), 2016-01-04
Supplement: Supplemental_Tables.zip [file Supplemental_Table_S14.xlsx]

## Sheet: Sheet1
# Supplemental Table S14: list of RNA-seq samples used in this study
SampleID	Species	Tissue	Library type	Publication reference	Remarks
Brain_Female	Human (Homo sapiens)	Brain	Illumina HISeq2000, polyA, non-strand-specific	Illumina Body Map, Derrien et al, Genome Res, 2012
Brain_Male1	Human (Homo sapiens)	Brain, prefrontal cortex	Illumina GAII, polyA, non-strand-specific	Brawand, Soumillon, Necsulea et al., Nature, 2011
Brain_Male2ss	Human (Homo sapiens)	Brain, prefrontal cortex	Illumina GAII, polyA, strand-specific	Necsulea et al., Nature, 2014	Paired-end libraries, 100bp run
Brain_Male3	Human (Homo sapiens)	Brain, frontal cortex	Illumina GAII, polyA, non-strand-specific	Brawand, Soumillon, Necsulea et al., Nature, 2011
Brain_Male9	Human (Homo sapiens)	Brain, frontal cortex	Illumina GAII, polyA, strand-specific	Necsulea et al., Nature, 2014
Cerebellum_Male	Human (Homo sapiens)	Cerebellum	Illumina GAII, polyA, non-strand-specific	Brawand, Soumillon, Necsulea et al., Nature, 2011
Heart_Female	Human (Homo sapiens)	Heart	Illumina GAII, polyA, non-strand-specific	Brawand, Soumillon, Necsulea et al., Nature, 2011
Heart_Male1	Human (Homo sapiens)	Heart	Illumina GAII, polyA, non-strand-specific	Brawand, Soumillon, Necsulea et al., Nature, 2011
Heart_Male2	Human (Homo sapiens)	Heart	Illumina GAII, polyA, non-strand-specific	Brawand, Soumillon, Necsulea et al., Nature, 2011
Kidney_Female	Human (Homo sapiens)	Kidney	Illumina GAII, polyA, non-strand-specific	Brawand, Soumillon, Necsulea et al., Nature, 2011
Kidney_Male1	Human (Homo sapiens)	Kidney	Illumina GAII, polyA, non-strand-specific	Brawand, Soumillon, Necsulea et al., Nature, 2011
Kidney_Male2	Human (Homo sapiens)	Kidney	Illumina GAII, polyA, non-strand-specific	Brawand, Soumillon, Necsulea et al., Nature, 2011
Liver_Male1	Human (Homo sapiens)	Liver	Illumina GAII, polyA, non-strand-specific	Brawand, Soumillon, Necsulea et al., Nature, 2011
Liver_Male2	Human (Homo sapiens)	Liver	Illumina GAII, polyA, non-strand-specific	Brawand, Soumillon, Necsulea et al., Nature, 2011
Testis_Male1	Human (Homo sapiens)	Testis	Illumina GAII, polyA, non-strand-specific	Brawand, Soumillon, Necsulea et al., Nature, 2011
Testis_Male2	Human (Homo sapiens)	Testis	Illumina GAII, polyA, non-strand-specific	Brawand, Soumillon, Necsulea et al., Nature, 2011
Testis_Male3	Human (Homo sapiens)	Testis	Illumina GAII, polyA, strand-specific	Necsulea et al., Nature, 2014
Brain_Female1	Chimpanzee (Pan troglodytes)	Brain, prefrontal cortex	Illumina GAII, polyA, non-strand-specific	Brawand, Soumillon, Necsulea et al., Nature, 2011
Brain_Male2	Chimpanzee (Pan troglodytes)	Brain, prefrontal cortex	Illumina GAII, polyA, non-strand-specific	Brawand, Soumillon, Necsulea et al., Nature, 2011	Paired-end libraries, 100bp run
Brain_Male3	Chimpanzee (Pan troglodytes)	Brain, prefrontal cortex	Illumina GAII, polyA, non-strand-specific	Brawand, Soumillon, Necsulea et al., Nature, 2011	Paired-end libraries, 100bp run
Brain_Male4	Chimpanzee (Pan troglodytes)	Brain, prefrontal cortex	Illumina GAII, polyA, non-strand-specific	Brawand, Soumillon, Necsulea et al., Nature, 2011	Paired-end libraries, 100bp run
Brain_Male5	Chimpanzee (Pan troglodytes)	Brain, prefrontal cortex	Illumina GAII, polyA, non-strand-specific	Brawand, Soumillon, Necsulea et al., Nature, 2011	Paired-end libraries, 100bp run
Cerebellum_Female1	Chimpanzee (Pan troglodytes)	Cerebellum	Illumina GAII, polyA, non-strand-specific	Brawand, Soumillon, Necsulea et al., Nature, 2011
Cerebellum_Male1	Chimpanzee (Pan troglodytes)	Cerebellum	Illumina GAII, polyA, non-strand-specific	Brawand, Soumillon, Necsulea et al., Nature, 2011
Heart_Female1	Chimpanzee (Pan troglodytes)	Heart	Illumina GAII, polyA, non-strand-specific	Brawand, Soumillon, Necsulea et al., Nature, 2011
Heart_Male1	Chimpanzee (Pan troglodytes)	Heart	Illumina GAII, polyA, non-strand-specific	Brawand, Soumillon, Necsulea et al., Nature, 2011
Kidney_Female1	Chimpanzee (Pan troglodytes)	Kidney	Illumina GAII, polyA, non-strand-specific	Brawand, Soumillon, Necsulea et al., Nature, 2011
Kidney_Male1	Chimpanzee (Pan troglodytes)	Kidney	Illumina GAII, polyA, non-strand-specific	Brawand, Soumillon, Necsulea et al., Nature, 2011
Liver_Female1	Chimpanzee (Pan troglodytes)	Liver	Illumina GAII, polyA, non-strand-specific	Brawand, Soumillon, Necsulea et al., Nature, 2011
Liver_Male1	Chimpanzee (Pan troglodytes)	Liver	Illumina GAII, polyA, non-strand-specific	Brawand, Soumillon, Necsulea et al., Nature, 2011
Testis_Male1	Chimpanzee (Pan troglodytes)	Testis	Illumina GAII, polyA, non-strand-specific	Brawand, Soumillon, Necsulea et al., Nature, 2011
Brain_Female2	Gorilla (Gorilla gorilla)	Brain, prefrontal cortex	Illumina GAII, polyA, non-strand-specific	Brawand, Soumillon, Necsulea et al., Nature, 2011	This sample was published as "ggo br M1" in Brawand et al, and it was assumed that the sample was derived from a male individual. However, we realized that this sample was mislabeled in our initial data transfers, and that it was in fact extracted from a second female individual.
Cerebellum_Female1	Gorilla (Gorilla gorilla)	Cerebellum	Illumina GAII, polyA, non-strand-specific	Brawand, Soumillon, Necsulea et al., Nature, 2011
Cerebellum_Male1	Gorilla (Gorilla gorilla)	Cerebellum	Illumina GAII, polyA, non-strand-specific	Brawand, Soumillon, Necsulea et al., Nature, 2011
Heart_Female1	Gorilla (Gorilla gorilla)	Heart	Illumina GAII, polyA, non-strand-specific	Brawand, Soumillon, Necsulea et al., Nature, 2011
Heart_Male1	Gorilla (Gorilla gorilla)	Heart	Illumina GAII, polyA, non-strand-specific	Brawand, Soumillon, Necsulea et al., Nature, 2011
Kidney_Female1	Gorilla (Gorilla gorilla)	Kidney	Illumina GAII, polyA, non-strand-specific	Brawand, Soumillon, Necsulea et al., Nature, 2011
Kidney_Male1	Gorilla (Gorilla gorilla)	Kidney	Illumina GAII, polyA, non-strand-specific	Brawand, Soumillon, Necsulea et al., Nature, 2011
Liver_Female1	Gorilla (Gorilla gorilla)	Liver	Illumina GAII, polyA, non-strand-specific	Brawand, Soumillon, Necsulea et al., Nature, 2011
Liver_Male1	Gorilla (Gorilla gorilla)	Liver	Illumina GAII, polyA, non-strand-specific	Brawand, Soumillon, Necsulea et al., Nature, 2011
Testis_Male1	Gorilla (Gorilla gorilla)	Testis	Illumina GAII, polyA, non-strand-specific	Necsulea et al., Nature, 2014
Brain_Female1	Orangutan (Pongo pygmaeus)	Brain, prefrontal cortex	Illumina GAII, polyA, non-strand-specific	Brawand, Soumillon, Necsulea et al., Nature, 2011
Brain_Male1	Orangutan (Pongo pygmaeus)	Brain, prefrontal cortex	Illumina GAII, polyA, non-strand-specific	Brawand, Soumillon, Necsulea et al., Nature, 2011	Paired-end libraries, 100bp run
Cerebellum_Female1	Orangutan (Pongo pygmaeus)	Cerebellum	Illumina GAII, polyA, non-strand-specific	Brawand, Soumillon, Necsulea et al., Nature, 2011
Heart_Female1	Orangutan (Pongo pygmaeus)	Heart	Illumina GAII, polyA, non-strand-specific	Brawand, Soumillon, Necsulea et al., Nature, 2011
Heart_Male1	Orangutan (Pongo pygmaeus)	Heart	Illumina GAII, polyA, non-strand-specific	Brawand, Soumillon, Necsulea et al., Nature, 2011
Kidney_Female1	Orangutan (Pongo pygmaeus)	Kidney	Illumina GAII, polyA, non-strand-specific	Brawand, Soumillon, Necsulea et al., Nature, 2011
Kidney_Male1	Orangutan (Pongo pygmaeus)	Kidney	Illumina GAII, polyA, non-strand-specific	Brawand, Soumillon, Necsulea et al., Nature, 2011
Liver_Female1	Orangutan (Pongo pygmaeus)	Liver	Illumina GAII, polyA, non-strand-specific	Brawand, Soumillon, Necsulea et al., Nature, 2011
Liver_Male1	Orangutan (Pongo pygmaeus)	Liver	Illumina GAII, polyA, non-strand-specific	Brawand, Soumillon, Necsulea et al., Nature, 2011
Testis_Run22_paired_end	Orangutan (Pongo pygmaeus)	Testis	Illumina MiSeq, polyA, strand-specific, paired-end	This manuscript	ppy ts M 1 and ppy ts M 2 correspond to technical replicates of the same sample
Testis_Run30_paired_end	Orangutan (Pongo pygmaeus)	Testis	Illumina MiSeq, polyA, strand-specific, paired-end	This manuscript	ppy ts M 1 and ppy ts M 2 correspond to technical replicates of the same sample
Brain_Female	Macaque (Macaca mulatta)	Brain	Illumina GAII, polyA, non-strand-specific	Brawand, Soumillon, Necsulea et al., Nature, 2011
Brain_Male1	Macaque (Macaca mulatta)	Brain	Illumina GAII, polyA, non-strand-specific	Necsulea et al., Nature, 2014
Brain_Male2	Macaque (Macaca mulatta)	Brain, prefrontal cortex	Illumina GAII, polyA, non-strand-specific	Brawand, Soumillon, Necsulea et al., Nature, 2011	Paired-end libraries, 100bp run
Cerebellum_Female	Macaque (Macaca mulatta)	Cerebellum	Illumina GAII, polyA, non-strand-specific	Brawand, Soumillon, Necsulea et al., Nature, 2011
Cerebellum_Male	Macaque (Macaca mulatta)	Cerebellum	Illumina GAII, polyA, non-strand-specific	Brawand, Soumillon, Necsulea et al., Nature, 2011
Heart_Female	Macaque (Macaca mulatta)	Heart	Illumina GAII, polyA, non-strand-specific	Brawand, Soumillon, Necsulea et al., Nature, 2011
Heart_Male	Macaque (Macaca mulatta)	Heart	Illumina GAII, polyA, non-strand-specific	Brawand, Soumillon, Necsulea et al., Nature, 2011
Kidney_Female	Macaque (Macaca mulatta)	Kidney	Illumina GAII, polyA, non-strand-specific	Brawand, Soumillon, Necsulea et al., Nature, 2011
Kidney_Male	Macaque (Macaca mulatta)	Kidney	Illumina GAII, polyA, non-strand-specific	Brawand, Soumillon, Necsulea et al., Nature, 2011
Liver_Female	Macaque (Macaca mulatta)	Liver	Illumina GAII, polyA, non-strand-specific	Brawand, Soumillon, Necsulea et al., Nature, 2011
Liver_Male	Macaque (Macaca mulatta)	Liver	Illumina GAII, polyA, non-strand-specific	Brawand, Soumillon, Necsulea et al., Nature, 2011
Testis_Male1	Macaque (Macaca mulatta)	Testis	Illumina GAII, polyA, non-strand-specific	Necsulea et al., Nature, 2014
Testis_Male2	Macaque (Macaca mulatta)	Testis	Illumina GAII, polyA, non-strand-specific	Brawand, Soumillon, Necsulea et al., Nature, 2011
Brain_Female	Mouse (Mus musculus)	Brain	Illumina GAII, polyA, non-strand-specific	Brawand, Soumillon, Necsulea et al., Nature, 2011	C57BL/6 mouse
Brain_Male1	Mouse (Mus musculus)	Brain	Illumina GAII, polyA, non-strand-specific	Brawand, Soumillon, Necsulea et al., Nature, 2011	C57BL/6 mouse; library generated from pool of brain RNAs extracted from 3 mice
Brain_Male2	Mouse (Mus musculus)	Brain	Illumina GAII, polyA, non-strand-specific	Brawand, Soumillon, Necsulea et al., Nature, 2011	Wild type mouse
Brain_Male3	Mouse (Mus musculus)	Brain	Illumina GAII, polyA, strand-specific	Necsulea et al., Nature, 2014	C57BL/6 mouse
Brain_Male4	Mouse (Mus musculus)	Brain	Illumina GAII, polyA, strand-specific	Necsulea et al., Nature, 2014	C57BL/6 mouse; library generated from pool of brain RNAs extracted from 3 mice
Cerebellum_Female	Mouse (Mus musculus)	Cerebellum	Illumina GAII, polyA, non-strand-specific	Brawand, Soumillon, Necsulea et al., Nature, 2011	C57BL/6 mouse
Cerebellum_Male1	Mouse (Mus musculus)	Cerebellum	Illumina GAII, polyA, non-strand-specific	Brawand, Soumillon, Necsulea et al., Nature, 2011	C57BL/6 mouse
Cerebellum_Male2	Mouse (Mus musculus)	Cerebellum	Illumina GAII, polyA, non-strand-specific	Brawand, Soumillon, Necsulea et al., Nature, 2011	Wild type mouse
Heart_Female	Mouse (Mus musculus)	Heart	Illumina GAII, polyA, non-strand-specific	Brawand, Soumillon, Necsulea et al., Nature, 2011	C57BL/6 mouse
Heart_Male1	Mouse (Mus musculus)	Heart	Illumina GAII, polyA, non-strand-specific	Brawand, Soumillon, Necsulea et al., Nature, 2011	C57BL/6 mouse
Heart_Male2	Mouse (Mus musculus)	Heart	Illumina GAII, polyA, non-strand-specific	Brawand, Soumillon, Necsulea et al., Nature, 2011	Wild type mouse
Kidney_Female	Mouse (Mus musculus)	Kidney	Illumina GAII, polyA, non-strand-specific	Brawand, Soumillon, Necsulea et al., Nature, 2011	C57BL/6 mouse
Kidney_Male1	Mouse (Mus musculus)	Kidney	Illumina GAII, polyA, non-strand-specific	Brawand, Soumillon, Necsulea et al., Nature, 2011	C57BL/6 mouse
Kidney_Male2	Mouse (Mus musculus)	Kidney	Illumina GAII, polyA, non-strand-specific	Brawand, Soumillon, Necsulea et al., Nature, 2011	Wild type mouse
Liver_Female	Mouse (Mus musculus)	Liver	Illumina GAII, polyA, non-strand-specific	Brawand, Soumillon, Necsulea et al., Nature, 2011	C57BL/6 mouse
Liver_Male1	Mouse (Mus musculus)	Liver	Illumina GAII, polyA, non-strand-specific	Brawand, Soumillon, Necsulea et al., Nature, 2011	C57BL/6 mouse
Liver_Male2	Mouse (Mus musculus)	Liver	Illumina GAII, polyA, non-strand-specific	Brawand, Soumillon, Necsulea et al., Nature, 2011	Wild type mouse
Testis_Male1	Mouse (Mus musculus)	Testis	Illumina GAII, polyA, non-strand-specific	Brawand, Soumillon, Necsulea et al., Nature, 2011	C57BL/6 mouse
Testis_Male2	Mouse (Mus musculus)	Testis	Illumina GAII, polyA, non-strand-specific	Brawand, Soumillon, Necsulea et al., Nature, 2011	Wild type mouse
Testis_Male3	Mouse (Mus musculus)	Testis	Illumina GAII, polyA, strand-specific	Necsulea et al., Nature, 2014	C57BL/6 mouse
Testis_Male4	Mouse (Mus musculus)	Testis	Illumina GAII, polyA, strand-specific	Necsulea et al., Nature, 2014	C57BL/6 mouse
Sertoli_Male1	Mouse (Mus musculus)	Sertoli	Illumina GAII, polyA, non-strand-specific	Soumillon et al., Cell Rep. 2013 (no GSE43717)	C57BL/6 mouse
Spermatogonia_Male1	Mouse (Mus musculus)	Spermatogonia	Illumina GAII, polyA, non-strand-specific	Soumillon et al., Cell Rep. 2013 (no GSE43717)	C57BL/6 mouse
Spermatocytes_Male1	Mouse (Mus musculus)	Spermatocytes	Illumina GAII, polyA, non-strand-specific	Soumillon et al., Cell Rep. 2013 (no GSE43717)	C57BL/6 mouse
Spermatids_Male1	Mouse (Mus musculus)	Spermatids	Illumina GAII, polyA, non-strand-specific	Soumillon et al., Cell Rep. 2013 (no GSE43717)	C57BL/6 mouse
Spermatids_Male2	Mouse (Mus musculus)	Spermatids	Illumina GAII, polyA, non-strand-specific	Soumillon et al., Cell Rep. 2013 (no GSE43717)	C57BL/6 mouse
Spermatozoa_Male1	Mouse (Mus musculus)	Spermatozoa	Illumina GAII, polyA, non-strand-specific	Soumillon et al., Cell Rep. 2013 (no GSE43717)	C57BL/6 mouse
Brain_Female	Rat (Rattus norvegicus)	Brain	Illumina HISeq2000, polyA, strand-specific	Cortez et al., Nature, 2014	Brown Norway
Brain_Male	Rat (Rattus norvegicus)	Brain	Illumina HISeq2000, polyA, strand-specific	Cortez et al., Nature, 2014	Brown Norway
Cerebellum_Female	Rat (Rattus norvegicus)	Cerebellum	Illumina HISeq2000, polyA, strand-specific	Cortez et al., Nature, 2014	Brown Norway
Cerebellum_Male	Rat (Rattus norvegicus)	Cerebellum	Illumina HISeq2000, polyA, strand-specific	Cortez et al., Nature, 2014	Brown Norway
Heart_Female	Rat (Rattus norvegicus)	Heart	Illumina HISeq2000, polyA, strand-specific	Cortez et al., Nature, 2014	Brown Norway
Heart_Male	Rat (Rattus norvegicus)	Heart	Illumina HISeq2000, polyA, strand-specific	Cortez et al., Nature, 2014	Brown Norway
Kidney_Female	Rat (Rattus norvegicus)	Kidney	Illumina HISeq2000, polyA, strand-specific	Cortez et al., Nature, 2014	Brown Norway
Kidney_Male	Rat (Rattus norvegicus)	Kidney	Illumina HISeq2000, polyA, strand-specific	Cortez et al., Nature, 2014	Brown Norway
Liver_Female	Rat (Rattus norvegicus)	Liver	Illumina HISeq2000, polyA, strand-specific	Cortez et al., Nature, 2014	Brown Norway
Liver_Male	Rat (Rattus norvegicus)	Liver	Illumina HISeq2000, polyA, strand-specific	Cortez et al., Nature, 2014	Brown Norway
Testis_Male1	Rat (Rattus norvegicus)	Testis	Illumina HISeq2000, polyA, strand-specific	Cortez et al., Nature, 2014	Brown Norway
Brain_Female	Opossum (Monodelphis domestica)	Brain	Illumina GAII, polyA, non-strand-specific	Brawand, Soumillon, Necsulea et al., Nature, 2011
Brain_Male	Opossum (Monodelphis domestica)	Brain	Illumina GAII, polyA, non-strand-specific	Brawand, Soumillon, Necsulea et al., Nature, 2011
Brain_Male2	Opossum (Monodelphis domestica)	Brain	Illumina GAII, polyA, strand-specific	Necsulea et al., Nature, 2014
Cerebellum_Female	Opossum (Monodelphis domestica)	Cerebellum	Illumina GAII, polyA, non-strand-specific	Brawand, Soumillon, Necsulea et al., Nature, 2011
Cerebellum_Male	Opossum (Monodelphis domestica)	Cerebellum	Illumina GAII, polyA, non-strand-specific	Brawand, Soumillon, Necsulea et al., Nature, 2011
Heart_Female	Opossum (Monodelphis domestica)	Heart	Illumina GAII, polyA, non-strand-specific	Brawand, Soumillon, Necsulea et al., Nature, 2011
Heart_Male	Opossum (Monodelphis domestica)	Heart	Illumina GAII, polyA, non-strand-specific	Brawand, Soumillon, Necsulea et al., Nature, 2011
Kidney_Female	Opossum (Monodelphis domestica)	Kidney	Illumina GAII, polyA, non-strand-specific	Brawand, Soumillon, Necsulea et al., Nature, 2011
Kidney_Male	Opossum (Monodelphis domestica)	Kidney	Illumina GAII, polyA, non-strand-specific	Brawand, Soumillon, Necsulea et al., Nature, 2011
Liver_Female	Opossum (Monodelphis domestica)	Liver	Illumina GAII, polyA, non-strand-specific	Brawand, Soumillon, Necsulea et al., Nature, 2011
Liver_Male	Opossum (Monodelphis domestica)	Liver	Illumina GAII, polyA, non-strand-specific	Brawand, Soumillon, Necsulea et al., Nature, 2011
Testis_Male1	Opossum (Monodelphis domestica)	Testis	Illumina GAII, polyA, non-strand-specific	Brawand, Soumillon, Necsulea et al., Nature, 2011
Testis_Male2	Opossum (Monodelphis domestica)	Testis	Illumina GAII, polyA, non-strand-specific	Brawand, Soumillon, Necsulea et al., Nature, 2011
Testis_Male3	Opossum (Monodelphis domestica)	Testis	Illumina GAII, polyA, strand-specific	Necsulea et al., Nature, 2014
Brain_Female	Platypus (Ornithorhynchus anatinus)	Brain	Illumina GAII, polyA, non-strand-specific	Brawand, Soumillon, Necsulea et al., Nature, 2011	not lactating
Brain_Male	Platypus (Ornithorhynchus anatinus)	Brain	Illumina GAII, polyA, non-strand-specific	Brawand, Soumillon, Necsulea et al., Nature, 2011
Brain_Male2	Platypus (Ornithorhynchus anatinus)	Brain	Illumina GAII, polyA, strand-specific	Necsulea et al., Nature, 2014
Cerebellum_Female	Platypus (Ornithorhynchus anatinus)	Cerebellum	Illumina GAII, polyA, non-strand-specific	Brawand, Soumillon, Necsulea et al., Nature, 2011	not lactating
Cerebellum_Male	Platypus (Ornithorhynchus anatinus)	Cerebellum	Illumina GAII, polyA, non-strand-specific	Brawand, Soumillon, Necsulea et al., Nature, 2011
Heart_Female	Platypus (Ornithorhynchus anatinus)	Heart	Illumina GAII, polyA, non-strand-specific	Brawand, Soumillon, Necsulea et al., Nature, 2011	not lactating
Heart_Male	Platypus (Ornithorhynchus anatinus)	Heart	Illumina GAII, polyA, non-strand-specific	Brawand, Soumillon, Necsulea et al., Nature, 2011
Kidney_Female	Platypus (Ornithorhynchus anatinus)	Kidney	Illumina GAII, polyA, non-strand-specific	Brawand, Soumillon, Necsulea et al., Nature, 2011	not lactating
Kidney_Male	Platypus (Ornithorhynchus anatinus)	Kidney	Illumina GAII, polyA, non-strand-specific	Brawand, Soumillon, Necsulea et al., Nature, 2011
Liver_Female	Platypus (Ornithorhynchus anatinus)	Liver	Illumina GAII, polyA, non-strand-specific	Brawand, Soumillon, Necsulea et al., Nature, 2011	not lactating
Liver_Male	Platypus (Ornithorhynchus anatinus)	Liver	Illumina GAII, polyA, non-strand-specific	Brawand, Soumillon, Necsulea et al., Nature, 2011
Testis_Male1	Platypus (Ornithorhynchus anatinus)	Testis	Illumina GAII, polyA, non-strand-specific	Brawand, Soumillon, Necsulea et al., Nature, 2011
Testis_Male2	Platypus (Ornithorhynchus anatinus)	Testis	Illumina GAII, polyA, non-strand-specific	Brawand, Soumillon, Necsulea et al., Nature, 2011
Testis_Male3	Platypus (Ornithorhynchus anatinus)	Testis	Illumina GAII, polyA, non-strand-specific	Brawand, Soumillon, Necsulea et al., Nature, 2012
Testis_Male4	Platypus (Ornithorhynchus anatinus)	Testis	Illumina GAII, polyA, strand-specific	Necsulea et al., Nature, 2014
Brain_Female	Chicken (Gallus gallus)	Brain	Illumina GAII, polyA, non-strand-specific	Brawand, Soumillon, Necsulea et al., Nature, 2011	Red Junglefowl
Brain_Male	Chicken (Gallus gallus)	Brain	Illumina GAII, polyA, non-strand-specific	Brawand, Soumillon, Necsulea et al., Nature, 2011	Red Junglefowl
Brain_Male2	Chicken (Gallus gallus)	Brain	Illumina GAII, polyA, strand-specific	Necsulea et al., Nature, 2014	Red Junglefowl
Cerebellum_Female	Chicken (Gallus gallus)	Cerebellum	Illumina GAII, polyA, non-strand-specific	Brawand, Soumillon, Necsulea et al., Nature, 2011	Red Junglefowl
Cerebellum_Male	Chicken (Gallus gallus)	Cerebellum	Illumina GAII, polyA, non-strand-specific	Brawand, Soumillon, Necsulea et al., Nature, 2011	Red Junglefowl
Heart_Female	Chicken (Gallus gallus)	Heart	Illumina GAII, polyA, non-strand-specific	Brawand, Soumillon, Necsulea et al., Nature, 2011	Red Junglefowl
Heart_Male	Chicken (Gallus gallus)	Heart	Illumina GAII, polyA, non-strand-specific	Brawand, Soumillon, Necsulea et al., Nature, 2011	Red Junglefowl
Kidney_Female	Chicken (Gallus gallus)	Kidney	Illumina GAII, polyA, non-strand-specific	Brawand, Soumillon, Necsulea et al., Nature, 2011	Red Junglefowl
Kidney_Male	Chicken (Gallus gallus)	Kidney	Illumina GAII, polyA, non-strand-specific	Brawand, Soumillon, Necsulea et al., Nature, 2011	Red Junglefowl
Liver_Female	Chicken (Gallus gallus)	Liver	Illumina GAII, polyA, non-strand-specific	Brawand, Soumillon, Necsulea et al., Nature, 2011	Red Junglefowl
Liver_Male	Chicken (Gallus gallus)	Liver	Illumina GAII, polyA, non-strand-specific	Brawand, Soumillon, Necsulea et al., Nature, 2011	Red Junglefowl
Testis_Male1	Chicken (Gallus gallus)	Testis	Illumina GAII, polyA, non-strand-specific	Brawand, Soumillon, Necsulea et al., Nature, 2011	Red Junglefowl
Testis_Male2	Chicken (Gallus gallus)	Testis	Illumina GAII, polyA, non-strand-specific	Brawand, Soumillon, Necsulea et al., Nature, 2011	Red Junglefowl
Testis_Male3	Chicken (Gallus gallus)	Testis	Illumina GAII, polyA, strand-specific	Necsulea et al., Nature, 2014	Red Junglefowl
Color codes
	Data generated for this study.
	Note of caution: the sex of these samples was wrong in our initial publication. However, otherwise the samples were unobjectionable, and they were used for expression analyses.
